# Supplementary material for: Impaired iron recycling from erythrocytes is an early hallmark of aging
Source: eLife. 2023 Jan 31;12:e79196. doi: 10.7554/eLife.79196 (PMC9931393; doi:10.7554/eLife.79196)
Supplement: Figure 1—figure supplement 1—source data 1. [file elife-79196-fig1-figsupp1-data1.xlsx]

## Sheet: Arkusz1
Figure 1 - Source Data 2 Related to Figure 1-figure supplement 1 (A-N)
RPMs of aged mice show increased labile iron levels, oxidative stress and diminished iron-recycling functions.
(A) Spleen non-heme iron content was determined in young and aged mice.
	Spleen non-heme iron (μg/g dry tissue)
Young	1008.21	993.162	579.344	632.012	669.632	406.293
Aged	5868.68	6019.16	6192.21	4995.9	6019.16	6041.73
(B) Liver non-heme iron content was determined in young and aged mice.
	Liver non-heme iron (μg/g dry tissue)
Young	288.489	334.04	321.025	234.262	201.725
Aged	388.267	477.199	383.929	451.17	416.465
(C) Muscle non-heme iron content was determined in young and aged mice.
	Muscle non-heme iron (μg/g dry tissue)
Young	61.2978	63.8519	51.0815	48.5274	51.0815	48.5274	63.8519	48.5274	45.9734
Aged	79.1763	58.7437	68.96	66.406	74.0682	61.2978	66.406	61.2978	45.9734
(D) Heart non-heme iron content was determined in young and aged mice.
	Heart non-heme iron (μg/g dry tissue)
Young	240.083	224.759	206.88	217.096	214.542	196.664	232.421	201.772	214.542
Aged	250.299	265.624	278.394	263.07	263.07	286.057	293.719	265.624	252.853
(E) Plasma transferrin saturation was determined in young and aged mice.
	Transfrrin saturation (%)
Young	43.8762	59.1882	51.6941	33.6282	26.5107	35.6672	46.0494	47.9062	46.1575
Aged	35.0314	31.5794	31.7924	29.2052	23.3489	31.2325	28.1142	32.5729	23.7574
(F) Blood hemoglobin (Hgb) concentration were determined in young and aged mice.
	HGB (g/dL)
Young	14	14.9	16.2	15.6	16.2	16	15.3	15.4	15.1
Aged	13.9	14.7	14.6	14.9	15.5	15.3	14.6	13	14.9
(G) Intracellular H-Ferritin expression levels were quantified in young and aged RPMs with flow cytometry.
	Intracellular H-Ferritin (normalized MFI)
Young	1.50264	1.59852	1.51032	1.03126
Aged	1.03569	0.432153	0.549684	0.339739
(H) Intracellular L-Ferritin expression levels were quantified in young and aged RPMs with flow cytometry.
	Intracellular L-Ferritin (normalized MFI)
Young	1.06642	1.1625	0.73106	1.24886	0.732642	1.08656	1.49442	1.13359
Aged	1.076	1.0702	1.15944	1.18451	0.944545	1.23354	1.01249	0.986682
(I) Cytosolic ferrous iron (Fe2+) levels in young and aged RPMs were quantified using the FerroOrange with flow cytometry.
	Labile iron (normalized MFI)
Young	0.60681	0.634509	0.714479	0.66736	0.886039	0.504608	0.657348
Aged	0.872225	1.13797	2.03401	1.20361	1.24299	1.47251	1.36553
(J) ROS levels in young and aged RPMs were quantified using CellROX Deep Red probe with flow cytometry.
	Oxidative stress (normalized MFI)
Young	0.832698	0.833836	0.682519	0.839524	0.880482
Aged	1.11519	1.28358	1.10382	1.11861	1.30974
(K) The phagocytosis capacity of PKH67-labeled temperature-stressed RBCs and (L) zymosan A fluorescent particles by young and aged RPMs were analyzed ex vivo by flow cytometry. The percentage of cargo-positive RPMs is indicated.
	Erythrophagocytosis rate (% of RBC+ RPMs)
Young	55.6	76.6	68.4	57	69.1
Aged	39.2	53.8	41.8	53.1	45.8
(K) The phagocytosis capacity of zymosan A fluorescent particles by young and aged RPMs were analyzed ex vivo by flow cytometry. The percentage of cargo-positive RPMs is indicated.
	Phagocytosis rate (% of Zymosan+ RPMs)
Young	36.42	36.61	36.04	33.56	49.64
Aged	41.85	64.11	43.58	40.07	42.31
(M) Lysosomal activity in young and aged RPMs was determined using Lysosomal Intracellular Activity Assay Kit with flow cytometry.
	Lysosomal activity (normalized MFI)
Young	1.25238	1.38608	1.1318	1.33842	0.979472	1.30821
Aged	0.68077	0.857203	0.691771	0.756012	0.897947	0.719941
(N) Mitochondrial activity in young and aged RPMs was determined using the TMRE probe with flow cytometry.
	Mitochondrial activity (normalized MFI)
Young	1.25238	1.38608	1.1318	1.33842	0.979472	1.30821
Aged	0.68077	0.857203	0.691771	0.756012	0.897947	0.719941
