# Supplementary material for: Impaired iron recycling from erythrocytes is an early hallmark of aging
Source: eLife. 2023 Jan 31;12:e79196. doi: 10.7554/eLife.79196 (PMC9931393; doi:10.7554/eLife.79196)
Supplement: Figure 1—figure supplement 3—source data 1. [file elife-79196-fig1-figsupp3-data1.xlsx]

## Sheet: Arkusz1
Figure 1 - Source Data 3 Related to Figure 1-figure supplement 3 (A)
Validation of the antibodies against H and L ferritin, and FPN for flow cytometry
(A) Shown is the intracellular staining and flow cytometric analysis of H ferritin in bone marrow-derived macrophages treated with an iron chelator DFO for 18 h. An expected drop in fluorescence intensity was observed.
	Intracellular H-Ferritin (normalized MFI)
Control	1.20992	1.11747	1.32834
DFO	0.793131	0.777633	0.773512
