# Supplementary material for: Impaired iron recycling from erythrocytes is an early hallmark of aging
Source: eLife. 2023 Jan 31;12:e79196. doi: 10.7554/eLife.79196 (PMC9931393; doi:10.7554/eLife.79196)
Supplement: Figure 1—figure supplement 4—source data 1. [file elife-79196-fig1-figsupp4-data1.xlsx]

## Sheet: Arkusz1
Figure 1 - Source Data 4 Related to Figure 1-figure supplement 4 (B-D)
Peritoneal macrophages in aged mice do not show functional impairments.
(B) The cytosolic ROS levels in young and aged peritoneal macrophages were quantified using CellRox Deep Red with flow cytometry.
	Oxidative stress (normalized MFI)
Young	1.42996	1.21387	1.08853	0.886739	0.942843	0.586969	1.5211	0.513758
Aged	0.697138	0.959369	0.611127	1.28902	0.881404	1.30774	1.15961	0.910821
(C) Lysosomal activity in young and aged peritoneal macrophages was determined using Lysosomal Intracellular Activity Assay Kit with flow cytometry.
	Lysosomal activity (normalized MFI)
Young	0.910653	1.21456	1.15597	1.05571	1.00187	1.02406
Aged	0.728438	1.07811	0.912277	0.685071	1.35801	0.87527
(D) Mitochondrial activity in young and aged peritoneal macrophages was determined using tetramethylrhodamine ethyl ester (TMRE) with flow cytometry.
	Mitochondrial activity (normalized MFI)
Young	1.28368	0.950135	0.85794	0.905688	1.17351	1.03825
Aged	0.846342	0.827551	1.23435	1.08572	0.711003	1.08583
