# Supplementary material for: Impaired iron recycling from erythrocytes is an early hallmark of aging
Source: eLife. 2023 Jan 31;12:e79196. doi: 10.7554/eLife.79196 (PMC9931393; doi:10.7554/eLife.79196)
Supplement: Figure 1—figure supplement 5—source data 1. [file elife-79196-fig1-figsupp5-data1.xlsx]

## Sheet: Arkusz1
Figure 1 - Source Data 5 Related to Figure 1-figure supplement 5 (A-H)
Hematological parameters and erythropoietic activity in aging mice.
(A) Blood hemoglobin (Hgb) concentration was determined in young, aged, and aged IR mice.
	Hgb (g/dL)
Young	14.2	13.8	13.9	15.4	14.7	15.3	15.3	15.6	15.4	16.5	13.9	15	13.7	13	14.6	14	14.9	14.6	15.4
Aged	14.2	13.1	14.1	13.5	14.3	14.6	13.5	14	14.9	13.9	15.1	14.3	13.6	13.5	14.1	13.4	13.4	13.8
Aged IR	13.8	14.3	14.1	14.1	14.6	13.6	13.6	13.9	14.2	14.5	14.5	12	13.5	10.7	13.3	14.4	13.7	13.1
(B) Blood hematocrit (HCT) was determined in young, aged, and aged IR mice.
	HCT (%)
Young	51.2	48.3	49.3	56.3	55	55.2	48	48.3	51.6	51.9	48.8	51.6	47.9	45.6	49.9	49.6	52.3	52.6	55.2
Aged	52.6	46.8	51.3	48.8	52.6	52.8	41.9	44.2	46.8	43.4	51.8	48.7	47.8	46.5	47.5	47.5	48	48.8
Aged IR	49.8	51.6	49.9	50.6	54	50.7	43.2	44.2	46.4	47.2	50.9	41.2	45.5	35.8	46	49.7	49.3	47.9
(C) Blood RBC counts were determined in young, aged, and aged IR mice.
	RBC count (10^6/ml)
Young	9.89	9.3	9.61	10.75	10.68	10.86	8.46	9.04	9.05	8.67	9.13	8.49	8.14	8.88	8.75	9.47	10.14	10.78
Aged	10.08	9.19	9.97	9.52	10.15	10.45	7.06	7.62	7.97	7.45	9.21	8.54	8.55	8.48	8.56	8.64	8.76	9.2
Aged IR	9.66	9.68	9.51	9.13	10.5	9.53	7.51	7.59	8.05	8.3	8.78	7.35	7.95	6.57	8.33	8.9	9.73	8.65
(D) Mean corpuscular volume (MCV) was determined in young, aged, and aged IR mice.
	MCV (fL)
Young	52	52	51	52	52	51	57	56	57	57	56	56	56	56	56	57	55	52	51
Aged	52	51	51	51	52	51	59	58	59	58	56	57	56	55	56	55	55	53
Aged IR	51	53	52	55	51	53	57	58	58	57	58	56	57	54	55	56	51	55
(D) Mean corpuscular hemoglobin (MCH) was determined in young, aged, and aged IR mice.
	MCH (pg)
Young	16.2	16	16.5	14.4	14.3	14.3	14.8	14.4	14.3	13.7	14.1	18	18.2	17	18.2	16	16.4
Aged	16.4	17	16.3	15	14.1	14.3	14.2	14.2	14.1	13.9	19.1	18.4	18.8	18.7	16.4	16.8
Aged IR	15.9	15.9	16.5	14.1	15.1	14.3	14.8	14.8	15.4	13.9	14.3	18.1	18.3	17.6	17.4	16.5
(F) Shown is the percentage of erythroid progenitor cells (EPCs, TER119+ CD71+) present in the bone marrow of young, aged, and aged IR mice
	EPCs in bone marrow (% TER119+ cells from live cells)
Young	38.81	42.62	37.03	41.95	44.89	40.67
Aged	45.66	46.41	43.46	39.3	38.98	45.27
Aged IR	44.34	42.94	43.79	36.4	38.91	40.69
(G) Shown is the percentage of erythroid progenitor cells (EPCs, TER119+ CD71+) present in the spleen of young, aged, and aged IR mice
	EPCs in spleen (% TER119+ cells from live cells)
Young	4.96	6.79	4.92	3.85	6.08	3.29
Aged	13	12	10.3	11.7	9.35	6.54
Aged IR	11.3	8.75	8.5	15.5	7.16	8.77
(H) EPO concentration in the plasma of young, aged, and aged IR mice were measured by Mouse Erythropoietin/EPO Quantikine ELISA Kit.
	EPO (pg/mL)
Young	237.333	174	194	205.667	204	169
Aged	274	242.333	245.667	275.667	312.333	292.333
Aged IR	260.667	272.333	304	249	229	322.333
