# Supplementary material for: Impaired iron recycling from erythrocytes is an early hallmark of aging
Source: eLife. 2023 Jan 31;12:e79196. doi: 10.7554/eLife.79196 (PMC9931393; doi:10.7554/eLife.79196)
Supplement: Figure 1—figure supplement 7—source data 1. [file elife-79196-fig1-figsupp7-data1.xlsx]

## Sheet: Arkusz1
Figure 1-figure supplement 7. Validation of the ferroportin antibody for flow cytometry.
Expression of ferroportin on the membrane of RBCs obtained from the spleen of young, aged, and aged IR mice assessed by flow cytometry.
	Membrane FPN of splenic RBCs (normalized MFI)
Young	0.866619	0.867216	0.832444	0.911987
Aged	1.03481	1.21404	1.1157	1.00317
Aged IR	1.13942	1.08212	0.954371	0.978099
