# Supplementary material for: Impaired iron recycling from erythrocytes is an early hallmark of aging
Source: eLife. 2023 Jan 31;12:e79196. doi: 10.7554/eLife.79196 (PMC9931393; doi:10.7554/eLife.79196)
Supplement: Figure 1—figure supplement 8—source data 1. [file elife-79196-fig1-figsupp8-data1.xlsx]

## Sheet: Arkusz1
Figure 1-figure supplement 8. RNAseq analysis identifies 9 differentially regulated genes that are involved in the proliferation control between aged and aged IR RPMs and differentially expressed proliferation marker Ki-67.
(B) Intracellular Ki-67 protein levels in RPMs derived from aged, and aged IR mice were assessed by flow cytometry.
	Intracellular Ki67 (normalized MFI)
Aged	0.822715	0.54984	0.73312	0.516228	0.470607	0.872118
Aged IR	0.885431	1.04748	0.98048	1.09712	0.525308	1.22158
