# Supplementary material for: Impaired iron recycling from erythrocytes is an early hallmark of aging
Source: eLife. 2023 Jan 31;12:e79196. doi: 10.7554/eLife.79196 (PMC9931393; doi:10.7554/eLife.79196)
Supplement: Figure 1—figure supplement 9—source data 1. [file elife-79196-fig1-figsupp9-data1.xlsx]

## Sheet: Arkusz1
Figure 1-figure supplement 9. Representations of monocytes, pre-RPMs and granulocytes in young, aged, and aged IR mice.
(A) Percentage of the total, monocyte-derived (M), and embryonically-derived (E) RPMs from CD45+ live cells present in the spleen of 8-, 20- and 36-week-old mice. The results represent a re-analysis of the data from Liu et al. (Z. Liu et al., 2019)
Cell type	8 weeks				20 weeks			36 weeks
Total RPMs	0.96	1.74	1.43	1.09	1.33	0.99	0.82	0.56	0.35	0.36	% RPMs from CD45+ live cells
M RPMs	0.19	0.28	0.39	0.16	0.21	0.14	0.18	0.2	0.14	0.11
E RPMs	0.77	1.45	1.01	0.92	1.11	0.84	0.63	0.35	0.21	0.25
(B) Percentage of splenic monocytes (CD11b-high, F4/80-low) from CD45+ cells.
	% of monocytes from CD45+ live cells
Control	5.29	4.52	4.71	3	3.54	3.51
Aged	5.21	4.41	6.09	5.6	4.87	4.9
Aged IR	8.6	5.65	5.84	5.95	3.99	4.32
(C) Percentage of splenic pre-RPMs (CD11b-high, F4/80 high) from CD45+ cells.
	% of pre-RPMs from CD45+ live cells
Young	1.88	1.23	1.25	0.96	0.72	0.81
Aged	1.93	1.38	2.32	1.07	0.65	0.86
Aged IR	2.5	1.78	1.97	1.11	0.49	0.47
(D) Percentage of splenic granulocytes (Gr1-high) from CD45+ cells.
	% of granulocytes from CD45+ live cells
Young	5.24	4.98	5.03	4.79
Aged	3.71	3.46	5.41	3.24
