# Supplementary material for: Impaired iron recycling from erythrocytes is an early hallmark of aging
Source: eLife. 2023 Jan 31;12:e79196. doi: 10.7554/eLife.79196 (PMC9931393; doi:10.7554/eLife.79196)
Supplement: Figure 1—source data 1. [file elife-79196-fig1-data1.xlsx]

## Sheet: Arkusz1
Figure 1 - Source Data 1 Related to Figure 1 (A-O)
Iron-reduced diet normalizes body iron parameters during aging, diminishes iron retention in RPMs, and prevents oxidative stress.
(A) Splenic non-heme iron content was determined in young, aged, and aged IR mice.
	Spleen non-heme iron (μg/g dry tissue)
Young	2105.91	1624.56	2567.2	2186.14	2617.35
Aged	6057	4973.96	5565.62	5605.73	5756.16
Aged IR	2777.8	3309.29	3810.7	3429.63	2336.56
(B) Liver non-heme iron content was determined in young, aged, and aged IR mice.
	Liver non-heme iron (μg/g dry tissue)
Young	326.196	381.351	323.689	306.14	481.351
Aged	633.999	708.928	860.026	699.182	584.139
Aged IR	396.112	458.788	401.126	398.619	310.873
(C) Plasma transferrin saturation was determined in young, aged, and aged IR mice.
	Transferrin Saturation (%)
Young	43.9145	64.71	53.8	56.93	52.85	56.2307	68.4071	55.9442	68.7286	49.4304	69.3125	64.6094	67.6653	48.3542
Aged	35.7944	32.8637	43.76	39.12	38.51	38.7126	39.6944	40.405	38.1473	37.1008	34.7796	38.4452	36.7018	46.5276
Aged IR	52.5603	36.2198	44.63	35.65	51.92	45.74	40.0882	46.4736	41.2752	44.3171	38.6114	54.571	45.7334	40.8369
(D) Relative mRNA expression of hepcidin (Hamp) in the liver of young, aged, and aged IR mice was determined by qPCR.
	Liver HAMP mRNA expression (fold change)
Young	1	2.21914	1.47427	2.42839	1	1.01396	0.80107
Aged	1.89211	3.18215	6.27667	3.38698	1.77768	3.11666
Aged IR	1.07923	1.28343	1.23114	0.003448	0.779165	0.752623	1.38511
(E) Serum IL-6 protein levels in young, aged, and aged IR mice were measured by Mouse IL-6 Quantikine ELISA Kit.
	IL-6 protein (ng/μL)
Young	1.02273	1.70454	3.75	2.15909	2.84091
Aged	0.113636	3.97727	1.02273	2.15909	1.47727
Aged IR	0.340909	2.15909	2.61364	1.70454	6.47727	1.70454
(F) Expression of ferroportin (FPN) on the cell membrane of young, aged, and aged IR RPMs was assessed by flow cytometry.
	Membrane FPN (normalized MFI)
Young	1.12575	0.990511	1.09086	1.17779	1.35899	0.844708
Aged	0.813461	0.966833	0.873215	0.716802	0.920651	0.804737
Aged IR	1.00203	1.11957	1.01777	0.97661	1.06188	1.13782
(G) Intracellular H-Ferritin protein levels in young, aged, and aged IR RPMs were quantified by flow cytometry.
	Intracellular H-Ferritin (normalized MFI)
Young	1.71518	1.18961	1.19906	1.20223	1.21712	1.49256
Aged	0.840283	0.490952	0.723839	0.725806	0.751861	0.923077
Aged IR	0.878049	0.963021	0.952853	0.844913	0.889578
(H) Cytosolic ferrous iron (Fe2+) levels in young, aged, and aged IR RPMs were measured using FerroOrange and flow cytometry.
	Labile iron (normalized MFI)
Young	0.713248	0.923228	0.884356	0.90635	0.569153	1.00031	0.78655
Aged	1.4212	1.30593	1.27397	1.30684	1.30225	1.00066
Aged IR	0.632003	0.828068	0.898001	1.21364	0.886973	1.05946	1.0878
(I) The total intracellular iron content in young, aged, and aged IR magnetically-sorter RPMs was assessed using a colorimetric commercial assay.
	Total iron (ng/μL)
Young	79.646	52.3285	63.3222	38.5513
Aged	222.206	152.228	169.911	126.184
Aged IR	53.5435	60.1561	59.1539	49.3493
(J) The cytosolic ROS levels in young, aged, and aged IR RPMs were assessed by determining CellROX Deep Red fluorescence intensity with flow cytometry.
	Oxidative stress (normalized MFI)
Young	0.960467	0.704973	0.580065	0.855528	0.815966
Aged	1.06172	1.32667	1.31437	1.16567	1.45814
Aged IR	0.957628	0.989801	1.1043	0.759449	0.945249
(K) The percentage of RPMs from CD45+ live cells present in the spleen of young, aged, and aged IR mice was assessed by flow cytometry.
	% of RPMs from CD45+ live cells
Young	1.94	1.6	2.08	1.82	1.64	1.45
Aged	0.55	0.92	0.6	0.87	0.73
Aged IR	1.14	1.24	1.17	0.93	0.93	1.01
(L) RBC clearance capacity in young, aged, and aged IR RPMs was determined using flow cytometry by measuring the percentage of RPMs that phagocytosed transfused PKH67-labeled temperature-stressed RBCs.
	Erythrophagocytosis rate of RPMs (% of RBC+ RPMs)
Young	48.7	55.8	49	57.9	47.6	58.3
Aged	24.7	25.7	38	29.1	20.9	30.3
Aged IR	36.2	40.1	37.5	41.7	43.9	43.5
(M) Lysosomal activity of young, aged, and aged IR RPMs was determined using a dedicated fluorescent probe and flow cytometry.
	Lysosomal activity (normalized MFI)
Young	1.32198	1.04367	0.966569	1.05827	1.19429
Aged	0.786983	0.837756	0.708942	0.568789	0.992183
Aged IR	1.36617	1.03239	0.935541	1.13289	1.17894
(N) Erythrophagocytosis capacity in young, aged, and aged IR Kupffer cells (KCs) was determined using flow cytometry by measuring the percentage of KCs that phagocytosed transfused PKH67-labeled temperature-stressed RBCs.
	Erythrophagocytosis rate of KCs (% of RBC+ KCs)
Young	14.4	12.6	14.9	12.4
Aged	11.7	6.81	13.4	10.9	5.42
Aged IR	11	6.48	10.4	8.93
(O) Percentages of KCs in total live cells in the livers of young, aged, and aged IR mice.
	%KCs from live cells
Young	5.11	7.95	4.02	6.37	1.56	1.68
Aged	10.9	17	9.14	15.2	6.17	4.74
Aged IR	3.63	9.07	3.1	8.06	1.79	6.92
