# Supplementary material for: Impaired iron recycling from erythrocytes is an early hallmark of aging
Source: eLife. 2023 Jan 31;12:e79196. doi: 10.7554/eLife.79196 (PMC9931393; doi:10.7554/eLife.79196)
Supplement: Figure 2—figure supplement 2—source data 1. [file elife-79196-fig2-figsupp2-data1.xlsx]

## Sheet: Arkusz1
Figure 2-figure supplement 2. FPN levels and iron status in splenic RBCs in aging.
(A) Expression of ferroportin on the membrane of RBCs obtained from the spleen of young, aged, and aged IR mice assessed by flow cytometry.
	Membrane FPN of splenic RBCs (normalized MFI)
Young	0.866619	0.867216	0.832444	0.911987
Aged	1.03481	1.21404	1.1157	1.00317
Aged IR	1.13942	1.08212	0.954371	0.978099
(B) Cytosolic ferrous iron (Fe2+) levels in RBCs derived from the spleen of young, aged, and aged IR mice were measured using FerroOrange and flow cytometry.
	Labile iron in splenic RBCs (normalized MFI)
Young	0.607736	1.17852	1.10174	0.764648	0.868286	1.13123
Aged	0.500507	0.770369	0.880609	1.16071	0.926331	0.730591
Aged IR	1.35263	1.76314	0.844749	0.986572	1.21893	1.21271
