# Supplementary material for: Impaired iron recycling from erythrocytes is an early hallmark of aging
Source: eLife. 2023 Jan 31;12:e79196. doi: 10.7554/eLife.79196 (PMC9931393; doi:10.7554/eLife.79196)
Supplement: Figure 2—source data 1. [file elife-79196-fig2-data1.xlsx]

## Sheet: Arkusz1
Figure 2 - Source Data 1 Related to Figure 2 (A-G) and (K-L)
Aging triggers the retention of senescent RBCs, increased hemolysis, and the formation of non-degradable iron-rich aggregates in the spleen.
(A) The RBC biotinylation life-span assay was performed on circulating RBCs from young, aged, and aged IR mice.
Day	0	4	11	18	25
Young	99.6	91.9	72.8	51.9	31	% of Biotin+ RBCs from TER119+ gate
	99.6	91.7	70.7	51	34
	99.7	92	71.9	49.4	32
	99.8	92.4	71.3	50.5	34.1
	99.6	92.4	72.7	53	34.2
	99.8	92.4	75.1	50	34.2
	99.7	92.5	72.2	50.7	33.8
	99.8	92.9	72	49.3	32.3
Aged	99.5	90.6	67.6	52.6	38.1
	99.5	90.5	70.6	52.7	34.2
	99.6	91.6	77.7	55	35.2
	98.7	91.3	71.7	52.5	32.4
	99.7	91	72.7	52.4	32.4
	99.3	92.1	70.4	53	34.1
	99.2	88.1	71.5	52.8	34
Aged IR	98.9	86.3	72.1	49.3	38.6
	99.5	90.5	68.9	50.9	34.3
	99.7	88.3	66.3	52.7	37.3
	98.5	90.9	70.7	50.3	35.8
	99.2	89.4	70.9	49.7	38
	99.5	91.6	72.7	53.3	36.7
	99.5	91.1	73.5	49	37.9
	99.8	92.2	73.6	50.7	40.5
(B) Cytosolic ferrous iron (Fe2+) levels in RBCs derived from the circulation of young, aged, and aged IR mice were measured using FerroOrange and flow cytometry.
	Labile iron in circulating RBCs (normalized MFI)
Young	0.984612	1.24482	0.988041	0.841347	0.841347	0.841347
Aged	0.902327	1.00984	1.07339	0.987049	1.30511	1.06393
Aged IR	0.898163	0.929388	0.969429	1.16623	0.858088	1.09555
(C) The cytosolic ROS levels in RBCs derived from circulation and the spleen of young and aged mice. Levels of ROS were estimated by determining CellROX Deep Red fluorescence intensity with flow cytometry.
	Circulation	Spleen
Young	0.337534	1.01645	Oxidative stress in RBCs (normalized MFI)
	0.193821	1.5168
	0.0786	1.1139
	0.1679	0.9858
	0.3782	0.9719
Aged	0.115235	2.2445
	0.296078	2.27959
	0.1457	1.4342
	0.0893	4.2952
	0.0454	2.2941
(D) The cytosolic ROS levels in RBCs derived from the spleen of young, aged, and aged IR mice. Levels of ROS were estimated by determining CellROX Deep Red fluorescence intensity with flow cytometry.
	Oxidative stress in splenic RBCs (normalized MFI)
Young	0.637548	0.999044	0.924773	0.892567	0.296676	0.897422
Aged	1.52091	1.69377	1.59847	1.72999	1.34528	1.62652
Aged IR	0.605999	0.817639	0.645435	0.663838	0.521244	0.886898	0.695964
(E) Extracellular heme levels were measured in the supernatant obtained after the dissociation of spleens from young, aged, and aged IR mice using the Heme Assay Kit.
	Extracellular heme in spleen (μM/g fresh tissue)
Young	153.943	130.228	138.669	170.044	140.338	124.378	140.315
Aged	186.955	180.718	195.087	195.038	175.298	167.031	173.753
Aged IR	173.437	178.197	177.817	158.405	147.732	163.108	147.437
(F) Portal vein plasma heme levels were measured in young, aged, and aged IR mice using Heme Assay Kit.
	Portal vein plasma heme (μM)
Young	26.4738	15.5568	25.655	16.3756
Aged	66.5939	35.2074	45.0328	69.5961
(G) Serum hemopexin levels were measured in young, aged, and aged IR mice by Mouse Hemopexin ELISA Kit.
	Serum hemopexin (ng/mL)
Young	77.2519	71.603	71.145	66.1832	75.3435
Aged	88.9313	92.4428	87.9389	81.0687	88.4733
Aged IR	80.9924	80.7634	88.0916	80.3817	71.5267
(K) The total iron content in magnetically-sorted, cell-free aggregates derived from spleens of young, aged, and aged IR mice was assessed using a commercial colorimetric assay.
	Total iron in splenic aggregates (μg/g tissue)
Young	53.0542	43.6455	1.04296	112.123
Aged	711.36	535.517	607.105	429.795
Aged IR	160.825	117.906	322.739	211.619
(L) The heme content in magnetically-sorted, cell-free aggregates derived from spleens of young, aged, and aged IR mice was assessed using Heme Assay Kit.
	Heme in splenic aggregates (μg/g tissue)
Young	5.90954	7.72543	2.67341	3.54393
Aged	74.366	159.113	173.133	155.166
Aged IR	63.2197	62.139	76.3126	71.534
