# Supplementary material for: Impaired iron recycling from erythrocytes is an early hallmark of aging
Source: eLife. 2023 Jan 31;12:e79196. doi: 10.7554/eLife.79196 (PMC9931393; doi:10.7554/eLife.79196)
Supplement: Figure 3—figure supplement 1—source data 1. [file elife-79196-fig3-figsupp1-data1.xlsx]

## Sheet: diffexpr-results_Young_vs_Aged
Figure 3 - Source Data 5 Related to Figure 3-figure supplement 1 A
Source data for volcano plot of differentially regulated genes (identified by RNAseq) in aged versus young RPMs
Ensembl gene ID	Gene name	baseMean	foldChange	lfcSE	stat	pvalue	padj	1 Young_RPM	2 Young_RPM	3 Young_RPM	4 Young_RPM	1 Aged_RPM	2 Aged_RPM	3 Aged_RPM	4 Aged_RPM	1 Aged IR_RPM	2 Aged IR_RPM	3 Aged IR_RPM	4 Aged IR_RPM
ENSMUSG00000031762	Mt2	8542.62	-24.5756	0.346928	-13.3145	1.90728e-40	2.06635e-36	757.547	673.456	600.76	447.798	17667.6	23867.3	12539.7	6852.49	14942.4	9828.67	5419.66	8914.04
ENSMUSG00000049493	Pls1	1307.93	-8.05568	0.246005	-12.2356	2.00714e-34	1.08727e-30	240.395	163.914	172.974	214.729	1304.7	1567.16	1550.24	1953.19	2188.62	1309.57	2703.68	2326.02
ENSMUSG00000061356	Nuggc	723.533	-20.1938	0.364208	-11.9049	1.11664e-32	4.03254e-29	68.6842	72.6858	38.1287	34.3873	878.976	684.609	1529.14	1225.06	1263.89	514.966	1298.55	1073.33
ENSMUSG00000038156	Spon1	1490.9	-22.0847	0.407344	-10.9612	5.87227e-28	1.5905e-24	141.409	108.287	35.3388	49.6705	1464.35	1473.11	2182	2263.65	1946.37	1363.73	4328.14	2534.8
ENSMUSG00000031530	Dusp4	8337.65	-6.02335	0.25287	-10.2446	1.25081e-24	2.71027e-21	2475.66	1800.09	1951.08	1561.95	17166.6	11138.6	8824.83	9776.22	9956.09	7982.47	14629.4	12788.8
ENSMUSG00000029093	Sorcs2	524.037	-10.7132	0.340544	-10.0466	9.50681e-24	1.71661e-20	64.644	39.3097	63.2379	58.0762	904.666	301.84	696.305	504.381	721.235	725.679	1112.01	1097.05
ENSMUSG00000020592	Sdc1	7788.1	-7.60474	0.301349	-9.71266	2.66308e-22	4.12168e-19	2135.27	910.797	1372.63	1189.03	8953.08	8968.81	14191.7	10521.1	17114.5	6633.52	11023.8	10442.9
ENSMUSG00000052271	Bhlha15	1764.72	-6.72929	0.294588	-9.33662	9.94566e-21	1.34689e-17	339.381	244.758	383.147	218.55	1763.46	1558.41	2597.8	2053.88	3474.66	1483.85	3601.49	3457.24
ENSMUSG00000056498	Tmem154	4190.28	-6.25549	0.288682	-9.16276	5.05878e-20	6.08965e-17	897.945	516.959	942.059	1063.71	4081.09	4574.63	7111.99	5628.37	9115.8	3782	6807.37	5761.43
ENSMUSG00000032053	Pou2af1	13881.5	-4.12363	0.227966	-8.96587	3.07833e-19	3.33507e-16	5022.03	3606.85	4007.24	3862.07	13759	13477.8	21770.4	19022	22510.6	13381.2	25153	21006.3
ENSMUSG00000022496	Tnfrsf17	1716.47	-6.58111	0.308383	-8.81478	1.19921e-18	1.18111e-15	543.413	269.234	528.222	340.816	1876.31	3012.94	3990.41	2180.68	2822.65	1930.88	1393.86	1708.22
ENSMUSG00000063354	Slc39a4	928.729	-4.17875	0.235947	-8.7438	2.25404e-18	2.03502e-15	424.226	255.142	278.061	321.712	1257.91	1291.57	1342.96	1447.88	1443.85	773.927	1018.75	1288.75
ENSMUSG00000053398	Phgdh	4272.46	-3.85268	0.226432	-8.59357	8.43062e-18	7.02595e-15	1933.26	1042.08	1649.77	1529.09	4983.92	5753.56	7633.29	5334.69	6302.85	3970.07	5335.62	5801.29
ENSMUSG00000018648	Dusp14	984.78	-4.93534	0.273266	-8.42823	3.50923e-17	2.71564e-14	470.689	252.175	297.59	175.757	1597.39	1689.65	1413.71	1193.36	1277.74	947.223	1262.67	1239.4
ENSMUSG00000074743	Thbd	1145.11	-5.68337	0.303663	-8.25503	1.51868e-16	1.09689e-13	311.099	269.234	206.453	196.389	2019.44	863.963	937.095	1763	2220.46	1551.79	2053.9	1348.54
ENSMUSG00000041189	Chrnb1	428.252	-6.33576	0.323494	-8.23359	1.81687e-16	1.23025e-13	80.805	66.7523	100.437	132.964	502.796	544.625	789.394	578.966	877.664	347.578	590.341	526.7
ENSMUSG00000029122	Evc	434.898	-9.21968	0.39065	-8.20355	2.33398e-16	1.48743e-13	106.057	54.1435	82.7673	31.3306	919.346	438.543	619.352	540.741	442.985	435.211	941.881	606.416
ENSMUSG00000030785	Cox6a2	290.358	-10.1036	0.407701	-8.18442	2.73607e-16	1.64681e-13	52.5232	34.1178	102.297	21.3965	422.055	683.515	521.298	488.532	261.638	348.562	331.042	217.323
ENSMUSG00000026167	Wnt10a	271.838	-7.52385	0.356978	-8.1559	3.46599e-16	1.97634e-13	67.6742	53.4018	28.829	50.4346	353.242	371.832	541.157	241.469	335.008	269.791	541.146	408.074
ENSMUSG00000029816	Gpnmb	92.5182	-9.34348	0.403419	-7.9916	1.33202e-15	7.21556e-13	15.1509	19.284	19.5294	15.2832	166.987	101.707	168.801	209.77	70.6008	100.433	136.311	86.3598
ENSMUSG00000027073	Prg2	12443	-4.86358	0.286331	-7.96986	1.58852e-15	8.19523e-13	5678.57	2112.34	3803.57	3693.96	12267.1	19360.4	27719.4	15003.7	14561.8	16302.7	13943.7	14869.1
ENSMUSG00000030313	Dennd5b	1426.76	-7.23523	0.359881	-7.93329	2.13412e-15	1.05096e-12	188.882	208.415	262.251	131.436	1552.43	832.248	1580.03	1755.54	2634.38	1232.77	4614.09	2128.63
ENSMUSG00000046841	Ckap4	4742.48	-6.91866	0.355925	-7.84011	4.5014e-15	2.12035e-12	1190.86	772.101	933.689	501.29	4751.79	4243.26	8060.26	6447.87	9554.64	2698.9	9140.04	8615.1
ENSMUSG00000010142	Tnfrsf13b	349.674	-7.85715	0.387132	-7.68216	1.56428e-14	7.06144e-12	48.483	25.2175	97.6468	53.4913	423.89	369.645	556.051	412.082	690.78	296.376	552.42	670
ENSMUSG00000085037	4933421O10Rik	544.046	-3.49642	0.236247	-7.64403	2.10519e-14	9.12304e-12	199.992	211.382	238.072	218.55	750.524	701.013	947.025	637.701	908.12	622.292	610.839	483.045
ENSMUSG00000067149	Jchain	747803	-5.24875	0.314569	-7.60397	2.87177e-14	1.19664e-11	307058	132946	221158	178925	658881	1.05823e+06	1.68979e+06	1.00249e+06	1.42713e+06	738135	789077	769810
ENSMUSG00000072623	Zfp9	157.212	-15.5389	0.521311	-7.59204	3.14905e-14	1.26359e-11	10.1006	8.15861	6.50978	22.1607	184.42	179.354	155.148	215.364	137.049	142.773	523.723	301.785
ENSMUSG00000038991	Txndc5	757.094	-5.52799	0.32543	-7.57998	3.45604e-14	1.33724e-11	196.962	74.9109	237.142	167.351	774.38	885.836	1076.11	996.642	1448.01	710.91	1360.04	1156.84
ENSMUSG00000031765	Mt1	8372.48	-6.74593	0.363754	-7.5711	3.70081e-14	1.38257e-11	3164.52	1866.1	1575.37	1917.28	16157.4	22347.1	12935.6	6053.5	12501.9	8131.15	4388.61	9431.25
ENSMUSG00000050248	Evc2	132.904	-7.4038	0.38195	-7.5619	3.9722e-14	1.4345e-11	32.322	24.4758	12.0896	21.3965	223.873	139.984	161.354	141.711	207.649	169.358	286.971	173.669
ENSMUSG00000016529	Il10	1696.49	-4.24095	0.276165	-7.54761	4.43327e-14	1.54936e-11	636.339	450.949	764.435	605.98	2269.92	3206.51	3255.63	1689.35	2746.51	1387.36	1712.6	1632.29
ENSMUSG00000075702	Selenom	553.117	-6.09543	0.353501	-7.37686	1.6206e-13	5.48676e-11	131.308	133.505	117.176	193.333	466.096	1055.35	1216.36	772.887	1043.78	405.671	565.744	536.19
ENSMUSG00000055895	Oosp2	251.993	-13.116	0.512597	-7.244	4.3564e-13	1.43022e-10	45.4528	9.64199	37.1988	19.104	318.376	273.406	508.886	349.617	766.918	256.991	241.876	196.445
ENSMUSG00000041895	Wipi1	1058.16	-4.26515	0.290327	-7.20773	5.68939e-13	1.81291e-10	215.143	188.39	435.226	307.193	912.006	1262.04	1570.1	1143.01	2000.35	1218	1982.15	1464.32
ENSMUSG00000034981	Parm1	77.4749	-160.735	1.0176	-7.20177	5.94375e-13	1.83985e-10	0	0	3.71988	0	43.123	67.8047	198.59	254.521	89.9814	41.3549	153.735	76.8697
ENSMUSG00000030104	Edem1	18410.3	-3.55422	0.254931	-7.17657	7.14814e-13	2.15119e-10	6414.9	7146.94	5674.67	5184.83	21319.3	18461.5	25773.2	21245.5	39673.5	14850.3	31644.7	23534.5
ENSMUSG00000040010	Slc7a5	4053.95	-3.28021	0.243547	-7.03677	1.9675e-12	5.76104e-10	1375.7	1892.8	2036.63	1047.66	7279.54	4820.7	4623.42	4113.36	5670.21	5090.59	6171.93	4524.87
ENSMUSG00000052684	Jun	20595	-3.43487	0.255748	-6.96098	3.37912e-12	9.63406e-10	7237.1	6813.92	10406.4	8151.31	23183.7	22774.7	39303.4	26745.2	30455.2	17873.2	34715.3	19480.3
ENSMUSG00000022498	Txndc11	3643.18	-3.58521	0.270011	-6.82215	8.96894e-12	2.49153e-09	1365.6	1208.22	1547.47	1036.97	3707.66	4243.26	6131.46	4409.84	7266.34	2753.05	5450.41	4597.95
ENSMUSG00000023272	Creld2	15902.2	-3.70981	0.281112	-6.72809	1.71906e-11	4.65606e-09	6341.17	5076.14	4443.39	5982.62	17226.3	21629.7	24548.2	17631	36200.2	11739.9	17871.1	22136.6
ENSMUSG00000038648	Creb3l2	1954.31	-5.23973	0.359827	-6.64066	3.12274e-11	8.25164e-09	448.468	562.202	253.882	288.089	2702.07	1007.23	2249.03	2177.88	2847.56	1806.81	5113.21	3995.33
ENSMUSG00000039910	Cited2	4915.08	-3.96206	0.300492	-6.61	3.84314e-11	9.91348e-09	1920.13	1764.48	1241.51	1674.28	6316.15	6466.6	8850.89	4518.92	11267	4200.47	6083.79	4676.71
ENSMUSG00000039004	Bmp6	281.346	-6.40119	0.405941	-6.59786	4.17137e-11	1.05099e-08	44.4427	90.4864	27.8991	45.0855	328.469	238.41	446.827	322.58	472.056	230.406	655.935	473.555
ENSMUSG00000024353	Mzb1	24038.5	-5.25919	0.364518	-6.56989	5.03539e-11	1.23985e-08	8282.51	4397.49	5515.65	5946.7	24849.9	37279.5	40632.7	24204.7	71979.5	21050.6	20776.7	23545.8
ENSMUSG00000038151	Prdm1	1791.47	-7.30286	0.439649	-6.52443	6.82602e-11	1.61965e-08	197.972	512.509	270.621	400.42	1938.7	1387.81	4386.35	2382.99	3063.52	905.868	4345.57	1705.37
ENSMUSG00000021610	Clptm1l	10465	-2.11235	0.165384	-6.52332	6.87688e-11	1.61965e-08	6646.21	5805.96	5744.42	5847.36	11444.1	13297.4	14300.9	11747.1	13645.3	9247.73	13742.9	14110.8
ENSMUSG00000003746	Man1a	10407.2	-2.88502	0.234543	-6.51727	7.16002e-11	1.65046e-08	5596.75	3874.6	3696.63	3122.36	12224	9439.07	12691.1	12639.4	16690.8	9737.1	19023.1	16151.2
ENSMUSG00000053318	Slamf8	3177.08	2.11936	0.166603	6.50427	7.80741e-11	1.7622e-08	4820.02	4674.88	3666.87	5438.54	2083.67	2338.17	2484.85	1872.08	2418.42	2724.5	2999.88	2603.13
ENSMUSG00000038312	Edem2	9718.09	-3.45924	0.275808	-6.49169	8.48804e-11	1.87672e-08	3788.74	3395.46	3243.73	3149.87	10125.7	11801.3	13564.9	11476.8	24919.3	8408.82	11272.8	11469.7
ENSMUSG00000020964	Sel1l	113.118	-15.11	0.60621	-6.46218	1.03208e-10	2.19245e-08	0	9.64199	6.50978	16.8115	142.214	63.4302	152.666	150.102	197.959	121.111	303.37	193.598
ENSMUSG00000054364	Rhob	10974.6	-3.53777	0.282047	-6.4629	1.02718e-10	2.19245e-08	5414.94	3095.08	4501.98	3917.09	10407.3	10829.1	23737.7	14915.1	18429.6	11900.4	14388.5	10158.2
ENSMUSG00000026822	Lcn2	785.165	-7.15442	0.440644	-6.44247	1.17544e-10	2.44899e-08	242.415	196.548	185.064	345.401	2958.97	2369.88	968.125	639.566	466.519	427.334	456.079	166.076
NA	NA	89.4246	-59.2918	0.920139	-6.40094	1.54419e-10	3.15655e-08	0	9.64199	0	0	49.5456	100.613	259.408	190.192	145.354	93.5407	62.5188	162.28
ENSMUSG00000047238	Mageh1	166.051	-15.1006	0.613817	-6.38063	1.76362e-10	3.53834e-08	24.2415	14.8338	18.5994	3.05664	139.462	288.717	414.556	68.0588	386.228	314.1	179.357	141.402
ENSMUSG00000059149	Mfsd4a	297.292	-11.9249	0.564019	-6.34005	2.29697e-10	4.52461e-08	31.3119	8.9003	74.3975	11.4624	353.242	239.504	498.957	402.759	877.664	232.375	434.557	402.38
ENSMUSG00000030407	Qpctl	1036.9	-3.11594	0.259471	-6.31926	2.62827e-10	5.08476e-08	536.343	399.772	339.439	314.834	1303.78	1099.09	1481.98	1068.43	2062.65	971.839	1339.54	1525.06
ENSMUSG00000049422	Chchd10	1287.28	-3.62249	0.295446	-6.28534	3.27143e-10	6.21801e-08	405.035	385.68	645.399	529.564	1381.77	1976.18	2359.49	1404.06	2516.71	1438.56	1052.57	1352.34
ENSMUSG00000030156	Cd69	10601.9	-5.5306	0.393627	-6.26846	3.6463e-10	6.81103e-08	2695.86	1560.52	4761.44	4206.71	7989.69	13135.5	35980.7	16033.9	11766.8	8306.42	12207.6	8577.14
ENSMUSG00000020256	Aldh1l2	90.1031	-16.874	0.656162	-6.21299	5.19855e-10	9.54595e-08	0	8.15861	18.5994	6.11329	65.1433	130.141	106.742	253.589	101.056	118.157	131.187	142.351
ENSMUSG00000028412	Slc44a1	94.7474	-8.94001	0.509278	-6.2054	5.45576e-10	9.85128e-08	25.2516	14.8338	8.36972	12.2266	94.5037	139.984	222.172	83.9081	171.657	68.9248	128.112	167.025
ENSMUSG00000053469	Tg	331.166	-3.81173	0.314904	-6.13027	8.77327e-10	1.55819e-07	89.8955	151.305	95.7868	112.332	319.294	404.641	573.428	419.54	592.493	376.132	284.922	554.221
ENSMUSG00000020475	Pgam2	145.945	-10.4754	0.559512	-6.05696	1.38721e-09	2.42404e-07	19.1912	8.15861	42.7786	16.0474	308.284	209.976	228.378	151.035	311.474	160.496	56.3694	239.15
ENSMUSG00000054203	Ifi205	4200.81	1.98132	0.166946	5.90889	3.44429e-09	5.92308e-07	6494.7	5916.48	5044.15	6638.27	2691.06	3887.84	2858.45	2724.22	3428.98	3274.91	3896.66	3554.04
ENSMUSG00000085837	Kcnmb4os2	254.911	-9.65554	0.560963	-5.83168	5.48709e-09	9.28861e-07	33.3321	34.8595	81.8373	21.3965	213.78	296.372	789.394	353.346	682.474	169.358	222.403	160.382
ENSMUSG00000041729	Coro2b	707.869	-6.04898	0.445499	-5.82873	5.58511e-09	9.30909e-07	220.194	151.305	70.6777	51.963	1197.35	499.786	493.992	793.398	1884.07	661.678	1073.07	1396.94
ENSMUSG00000032300	1700017B05Rik	3146.65	-3.49732	0.312626	-5.77768	7.57388e-09	1.24326e-06	1172.68	1302.41	1087.13	522.686	5102.28	2353.48	3344.99	3483.12	7013.01	3358.61	4895.94	4123.44
ENSMUSG00000038949	Cnst	1337.48	-3.20221	0.296995	-5.65351	1.57202e-08	2.54198e-06	396.954	427.956	683.527	469.195	1642.35	1163.62	1696.7	1829.2	1753.94	996.455	2781.57	2208.34
ENSMUSG00000029417	Cxcl9	7029.56	2.57304	0.242501	5.62256	1.88146e-08	2.99761e-06	12485.4	14153.7	7448.12	11878.1	4182.93	5553.43	4812.08	3317.17	4180.67	4596.3	7036.95	4709.93
ENSMUSG00000040520	Manea	1640.92	-3.798	0.342695	-5.61794	1.93245e-08	3.03423e-06	545.434	525.118	387.797	364.505	1611.15	1195.33	1958.59	2157.37	3215.8	1238.68	4588.47	1902.76
ENSMUSG00000042385	Gzmk	592.216	-9.09924	0.56984	-5.5906	2.26287e-08	3.50228e-06	250.495	155.755	127.406	46.6138	511.054	886.93	3212.19	666.603	438.832	256.006	121.963	432.748
ENSMUSG00000045658	Pid1	1788.6	2.04858	0.185722	5.57084	2.53513e-08	3.86839e-06	2984.73	2383.06	1818.09	2661.57	1360.67	1093.62	1124.51	1226.92	1585.06	1997.83	1557.84	1669.31
ENSMUSG00000033083	Tbc1d4	5993.74	2.03964	0.185436	5.54538	2.93308e-08	4.41348e-06	7533.04	8100.02	8349.26	7414.66	3951.72	4665.4	2600.28	4173.96	5529.01	6129.38	6195.51	7282.69
ENSMUSG00000020399	Havcr2	7396.64	1.92793	0.171417	5.52485	3.29762e-08	4.89403e-06	11492.5	11674.2	8847.73	9694.91	5935.38	6586.9	4604.8	4506.8	5937.38	7080.54	6392.29	6006.27
ENSMUSG00000034855	Cxcl10	3307.37	-1.91034	0.169315	-5.51535	3.48077e-08	5.09603e-06	2499.9	2437.94	2014.31	2348.27	4805.92	4724.46	4611	3626.69	2754.81	2810.16	3935.61	3119.39
ENSMUSG00000028184	Adgrl2	658.424	-5.11071	0.427954	-5.49949	3.80901e-08	5.50224e-06	48.483	198.773	85.5572	136.785	825.76	244.972	453.033	881.035	1180.83	1091.97	1664.43	1089.46
ENSMUSG00000049608	Gpr55	1404.52	-2.95265	0.285247	-5.47599	4.35076e-08	6.20212e-06	750.476	512.509	419.416	473.016	1697.4	1252.2	1935.01	1477.71	2544.4	1186.49	2846.14	1759.46
ENSMUSG00000040280	Ndufa4l2	51.8409	-38.9313	0.967915	-5.45798	4.81587e-08	6.776e-06	0	0	0	8.40577	96.3387	49.2131	127.842	67.1265	94.1343	75.8172	22.5477	80.6657
NA	NA	117.175	-9.91415	0.611035	-5.4162	6.08781e-08	8.45582e-06	34.3421	6.67523	13.0196	18.3399	164.235	226.38	201.072	121.201	207.649	276.684	100.44	36.0623
ENSMUSG00000047222	Rnase2a	30.7322	-74.8705	1.15429	-5.39408	6.88772e-08	9.44576e-06	0	0	0	3.05664	73.4009	77.6473	42.2003	50.3448	67.8321	6.89248	12.2988	35.1133
ENSMUSG00000039474	Wfs1	507.133	-3.65557	0.348997	-5.35849	8.39208e-08	1.1365e-05	145.449	177.264	156.235	129.907	427.56	299.653	867.589	632.108	1108.85	509.059	1007.47	624.448
ENSMUSG00000072601	Ear1	24.1506	-459.469	1.6534	-5.34887	8.85054e-08	1.18379e-05	0	0	0	0	121.112	104.988	60.8181	1.86462	0	0	1.0249	0
ENSMUSG00000030214	Plbd1	37360.7	1.77967	0.156941	5.29885	1.16533e-07	1.52111e-05	56804.9	50983.1	41410.6	50936.7	31225.7	31862.8	25160.1	24207.5	30600.6	37962.8	35056.6	32117.3
ENSMUSG00000027171	Prrg4	224.246	-5.16385	0.446853	-5.30028	1.15624e-07	1.52111e-05	54.5434	40.793	18.5994	29.8023	173.41	94.0517	251.961	221.89	438.832	244.191	746.126	376.756
ENSMUSG00000053411	Cbx7	2005.23	-2.59053	0.260519	-5.27121	1.35525e-07	1.74795e-05	893.905	637.855	1446.1	1152.36	2316.72	2179.59	3336.31	2865.93	2721.59	1673.89	2376.74	2461.73
ENSMUSG00000027435	Cd93	854.663	-3.61402	0.351914	-5.2672	1.38517e-07	1.76552e-05	235.344	356.754	333.859	174.993	945.954	663.83	969.366	1399.4	1212.67	789.681	2238.38	935.722
ENSMUSG00000035873	Pawr	109.552	-10.048	0.632544	-5.26262	1.42017e-07	1.78908e-05	36.3622	14.8338	14.8795	0.764161	132.122	133.422	192.384	206.973	184.116	98.4639	197.805	102.493
ENSMUSG00000011179	Odc1	40202.1	-1.84056	0.167795	-5.24537	1.5597e-07	1.94227e-05	30882.7	22771.4	25419.8	21416.4	48410.7	50780.3	41273.1	44489.9	54962	39511.6	47663.9	54843.2
ENSMUSG00000056938	Acbd4	543.141	-2.70822	0.275393	-5.21924	1.79658e-07	2.20371e-05	261.606	219.541	331.069	333.174	660.608	646.332	1103.41	692.708	804.295	437.18	512.449	515.312
ENSMUSG00000021703	Serinc5	1842.62	-3.05282	0.308585	-5.21783	1.81032e-07	2.20371e-05	515.132	805.477	803.493	474.544	1955.22	1115.5	2303.64	2559.2	2752.05	1726.07	4058.59	3042.52
ENSMUSG00000039783	Kmo	2534.1	1.80386	0.163339	5.21056	1.88272e-07	2.26638e-05	3603.9	2931.17	3373.93	3829.98	1500.13	2124.91	2194.42	1799.36	2353.36	2347.38	2107.19	2243.46
ENSMUSG00000063529	Stmnd1	26.6617	-129.408	1.35391	-5.18185	2.19691e-07	2.5871e-05	1.01006	0	0	0	52.2981	10.9362	17.3766	53.1418	105.209	21.6621	18.4482	39.8584
ENSMUSG00000011148	Adssl1	2059.49	-2.77925	0.284502	-5.18342	2.17857e-07	2.5871e-05	1374.69	980.516	779.314	926.927	2128.63	2608.29	3851.4	2699.04	3602.02	1688.66	1669.56	2404.79
ENSMUSG00000040618	Pck2	3680.76	-3.16472	0.32372	-5.13432	2.83165e-07	3.26409e-05	1011.07	825.503	2672.73	1835.52	4002.18	6286.15	5754.14	4036.91	5894.47	4200.47	3871.04	3778.95
NA	NA	187.294	-6.30314	0.517319	-5.13429	2.83205e-07	3.26409e-05	13.1308	34.8595	62.3079	71.8311	168.822	301.84	430.691	249.86	416.683	161.481	129.137	206.884
ENSMUSG00000029752	Asns	2260.5	-4.1347	0.39915	-5.13036	2.8919e-07	3.29798e-05	334.331	444.273	1838.55	729.01	2541.51	4209.36	3891.12	3192.24	1971.28	2875.15	2590.94	2508.23
ENSMUSG00000096210	H1f0	2217.07	-2.45214	0.252904	-5.11673	3.10872e-07	3.50832e-05	1010.06	959.749	1386.58	1469.48	2426.82	2552.52	4110.81	2745.66	3543.88	2392.67	2036.47	1970.14
ENSMUSG00000026548	Slamf9	924.482	-4.11988	0.399757	-5.10962	3.22813e-07	3.60552e-05	399.985	189.873	358.038	307.957	1054.22	1879.94	1526.66	711.354	2288.3	808.389	671.308	897.762
ENSMUSG00000074591	Ankub1	19.7619	-170.481	1.4585	-5.08295	3.71616e-07	4.10826e-05	0	0	0	0	58.7207	8.749	16.1354	23.3078	42.9142	61.0476	21.5229	4.74504
ENSMUSG00000019832	Rab32	2872.05	1.66458	0.145574	5.05008	4.41636e-07	4.83302e-05	3266.54	3706.98	3861.23	4411.5	2280.02	2537.21	2185.73	2157.37	2177.55	2668.37	2654.49	2557.58
ENSMUSG00000030954	Gp2	1657.54	-2.34799	0.244687	-5.03267	4.83694e-07	5.18957e-05	959.559	936.015	667.718	988.825	2476.36	1736.68	1524.18	2602.08	1967.13	2016.54	1412.31	2603.13
ENSMUSG00000043668	Tox3	15.2757	-133.581	1.40316	-5.03263	4.83797e-07	5.18957e-05	0	0	0	0	24.7728	16.4044	9.92948	32.6309	13.8433	42.3395	34.8465	8.54108
ENSMUSG00000032496	Ltf	1393.64	-10.7598	0.683648	-5.01366	5.34046e-07	5.61734e-05	138.379	422.764	252.022	325.533	6424.41	3810.19	1246.15	774.751	1047.94	334.777	1401.04	545.68
ENSMUSG00000045394	Epcam	1433.71	-4.45283	0.429726	-5.01418	5.32598e-07	5.61734e-05	298.978	316.702	420.346	580.762	1348.74	1900.72	2783.98	1168.19	4528.14	1369.63	858.864	1629.45
ENSMUSG00000040314	Ctsg	123.046	-14.873	0.777538	-5.00892	5.47372e-07	5.70214e-05	18.1811	38.568	9.29969	12.9907	513.806	512.91	85.6418	66.1942	73.3694	87.6329	52.2698	5.69405
ENSMUSG00000020576	Nbas	1284.24	-2.79324	0.296777	-4.99344	5.93124e-07	6.11991e-05	340.391	640.822	360.828	475.308	1669.87	828.967	1359.1	1221.33	2057.11	1544.9	3180.26	1731.94
ENSMUSG00000027479	Mapre1	6402.77	1.43102	0.103794	4.98143	6.31162e-07	6.45096e-05	7877.47	7709.89	7647.14	7491.07	5132.56	5682.47	5301.1	5355.2	6369.3	6613.82	5925.96	5727.27
ENSMUSG00000028246	Faxc	90.2797	-32.1098	1.00831	-4.96371	6.91575e-07	7.00236e-05	11.1107	0	0	0	64.2258	63.4302	44.6827	166.884	318.396	35.447	186.531	192.649
ENSMUSG00000033255	Gm5134	174.342	-5.89724	0.516193	-4.95946	7.06896e-07	7.09122e-05	76.7647	70.4607	15.8095	22.9248	187.172	255.908	346.291	306.731	179.963	88.6175	289.021	252.436
ENSMUSG00000020048	Hsp90b1	81156.1	-2.31112	0.244293	-4.9473	7.52482e-07	7.47926e-05	42435.7	39911.9	30076.1	34971.1	79312.4	78840.5	97030.9	85463.2	165186	64274.3	140753	115618
ENSMUSG00000051000	Fam160a1	55.4627	-27.6548	0.975856	-4.90796	9.20306e-07	9.06417e-05	0	0	8.36972	2.29248	158.729	33.9024	27.3061	70.8557	55.3731	34.4624	76.8673	197.394
ENSMUSG00000053101	Gpr141	453.936	2.49163	0.268572	4.90405	9.38822e-07	9.16324e-05	849.462	839.595	717.936	490.591	260.573	241.691	320.226	340.294	224.261	399.764	407.909	354.929
ENSMUSG00000036181	H1f2	2369.22	-2.8039	0.303994	-4.89297	9.93233e-07	9.60775e-05	1236.32	769.134	1257.32	1193.62	2909.43	2968.1	3817.89	2798.8	5203.69	2070.7	2354.19	1851.52
ENSMUSG00000075033	Nxpe3	1328.18	-2.40541	0.259586	-4.87808	1.07123e-06	0.000102705	731.285	489.517	724.446	688.509	1278.09	1225.95	1902.74	1927.09	2084.8	1091.97	2160.48	1633.24
ENSMUSG00000030124	Lag3	2968.78	-2.6126	0.284244	-4.87428	1.09204e-06	0.000103782	1916.09	1895.76	981.117	1092.75	3787.49	2456.28	5277.52	3856.04	3863.66	2713.67	4528	3257
ENSMUSG00000041538	H2-Ob	7498.55	1.57576	0.134685	4.87097	1.11052e-06	0.000104621	10485.5	9139.13	8972.34	10782.3	6495.06	6887.65	5569.2	6037.65	6977.02	6727.06	5737.38	6172.35
ENSMUSG00000032042	Srpr	7069.19	-2.00595	0.20707	-4.84998	1.23474e-06	0.00011532	4785.67	3649.87	3673.38	3224	7054.75	6970.76	7936.14	8792.63	11177.1	6258.37	10861.9	10445.7
ENSMUSG00000022844	Pdia5	2956.12	2.05416	0.215538	4.81839	1.44719e-06	0.000134008	4664.47	3827.87	3653.85	4889.1	2379.11	2582.05	1607.34	1723.84	2123.56	3287.71	2164.58	2569.91
ENSMUSG00000016498	Pdcd1lg2	652.783	-2.52132	0.278168	-4.79631	1.61613e-06	0.000148382	538.363	310.769	227.842	348.457	838.605	1037.85	808.012	907.14	517.739	611.461	894.736	792.422
ENSMUSG00000032549	Rab6b	405.764	-2.33076	0.254692	-4.79324	1.64108e-06	0.000149407	254.536	166.881	202.733	187.984	479.858	321.526	625.557	464.291	521.892	459.827	547.295	636.785
ENSMUSG00000001576	Ergic1	3174.42	-2.11182	0.225518	-4.78227	1.73328e-06	0.000156486	2280.72	1568.68	1418.2	1769.8	3253.5	3304.93	4428.55	3873.76	5678.52	3070.11	3670.16	3776.1
ENSMUSG00000036646	Man1b1	8783.15	-1.91105	0.195799	-4.77208	1.82337e-06	0.000162447	5211.92	5772.59	4663.8	4652.21	11298.2	8788.37	10248.5	8460.73	13954	7716.62	12692.3	11938.5
ENSMUSG00000024807	Syvn1	259.862	-4.41191	0.448798	-4.77142	1.82929e-06	0.000162447	25.2516	77.8776	91.137	60.3687	337.644	278.874	356.22	152.899	531.582	185.112	605.715	415.666
ENSMUSG00000076431	Sox4	268.408	2.67606	0.298175	4.76268	1.91038e-06	0.000168269	628.259	308.544	407.326	348.457	200.017	172.793	104.26	153.831	231.183	227.452	222.403	216.374
ENSMUSG00000070332	Trim80	19.5467	-186.562	1.58737	-4.75221	2.01205e-06	0.000174388	0	0	0	0	35.7829	24.0597	35.9944	21.4432	40.1455	0	16.3984	60.7365
ENSMUSG00000023045	Soat2	307.221	-3.4767	0.378236	-4.7529	2.00516e-06	0.000174388	44.4427	183.198	163.675	119.209	497.291	406.828	408.35	465.224	373.769	327.885	464.279	232.507
ENSMUSG00000005364	Il5ra	700.362	-3.11927	0.345591	-4.74899	2.04438e-06	0.000175784	334.331	194.323	195.294	230.777	663.361	647.426	1000.4	665.671	2025.27	614.415	917.283	915.793
NA	NA	121.111	-7.64226	0.618774	-4.74164	2.11998e-06	0.00018085	9.09056	13.3505	24.1792	46.6138	133.039	200.133	263.131	119.336	323.933	181.174	49.1951	90.1558
ENSMUSG00000024516	Sec11c	14546.8	-2.65051	0.296821	-4.73777	2.16086e-06	0.000182897	7758.29	5835.63	7128.21	8955.97	12801.1	22302.3	27148.5	16411.5	28128.2	13495.5	12037.4	12559.2
ENSMUSG00000074342	I830077J02Rik	637.009	2.32935	0.25812	4.72619	2.2877e-06	0.000192131	952.489	649.722	1049.94	1116.44	426.643	484.476	402.144	304.866	473.44	790.665	508.349	484.943
ENSMUSG00000007458	M6pr	13126.2	1.59514	0.142715	4.72047	2.35295e-06	0.000196091	19668.9	17881.4	15032	15544.6	9813.7	12153.4	10675.4	10067.1	12112.9	12838.7	10658.9	11067.3
ENSMUSG00000089762	Ier5l	1129.79	-2.01009	0.214975	-4.68548	2.79299e-06	0.000230987	674.722	648.239	889.05	821.473	1343.24	1624.03	1908.94	1223.19	895.661	1025.01	1095.62	1408.33
ENSMUSG00000042817	Flt3	6806.4	1.77618	0.177362	4.67281	2.97102e-06	0.000243848	8445.13	9162.86	8118.63	8288.86	5727.11	5422.19	3701.22	4298.89	6201.79	6246.55	8442.08	7621.49
ENSMUSG00000086765	Gm11827	67.892	-21.982	0.955737	-4.66473	3.09029e-06	0.000251731	0	17.8006	0	3.05664	38.5355	101.707	220.931	108.148	164.735	57.1091	66.6184	36.0623
ENSMUSG00000039989	Cbx4	2596.12	-1.85039	0.190532	-4.65973	3.16632e-06	0.000252397	1593.88	1438.88	1686.03	1605.5	2945.21	2573.3	3022.29	3160.54	3661.55	2156.36	3841.32	3468.63
ENSMUSG00000089844	A530032D15Rik	318.732	-3.54707	0.391844	-4.66162	3.13729e-06	0.000252397	86.8653	217.316	81.8373	90.171	484.446	466.978	212.243	527.689	437.448	276.684	445.831	497.28
ENSMUSG00000104835	Gm5547	902.026	-2.74038	0.312125	-4.65959	3.16836e-06	0.000252397	652.5	280.359	544.962	509.695	992.747	1347.35	1979.69	1125.3	1226.52	833.99	688.731	642.479
ENSMUSG00000017830	Dhx58	825.485	1.89718	0.19886	4.64578	3.38786e-06	0.000267913	1287.83	1160.01	954.148	1370.14	555.094	581.808	706.235	673.129	519.123	769.988	726.652	601.671
ENSMUSG00000032575	Manf	14739.8	-2.13389	0.235547	-4.64233	3.44495e-06	0.000270453	10011.7	7981.34	8176.29	9130.96	12993.8	20524.1	25285.4	16525.2	22996.5	12331.6	14322.9	16597.2
ENSMUSG00000054934	Kcnmb4	503.372	-16.5035	0.872155	-4.6376	3.52483e-06	0.000270837	65.654	0	47.4284	85.5861	585.372	760.069	1242.43	688.979	735.078	668.57	624.163	537.139
ENSMUSG00000038828	Tmem214	3388.35	-2.00002	0.215547	-4.63944	3.49355e-06	0.000270837	2504.95	1777.84	1768.8	2030.38	3840.7	3871.43	4957.29	3494.31	4544.75	2657.54	4488.03	4724.16
ENSMUSG00000041779	Tram2	492.038	-3.82411	0.41722	-4.63813	3.51572e-06	0.000270837	113.127	251.434	87.4171	68.7745	707.401	404.641	310.296	570.575	1122.69	450.965	958.279	858.853
ENSMUSG00000014905	Dnajb9	6844.06	-2.27051	0.255271	-4.63434	3.5807e-06	0.000273193	4403.87	2947.48	2750.85	3312.64	5283.03	8500.74	8776.42	7897.62	11973.1	5520.87	9980.45	10781.7
ENSMUSG00000031155	Pim2	1329.59	-1.89135	0.198879	-4.62298	3.78271e-06	0.000284596	755.526	647.497	908.58	933.041	1507.47	1251.11	1800.96	1577.47	1830.08	1435.6	1927.83	1379.86
ENSMUSG00000050628	Ubald2	2138.96	-1.90517	0.201101	-4.62414	3.76152e-06	0.000284596	1485.8	1085.84	1481.44	1762.16	2834.19	3233.85	2703.3	2307.47	2735.43	1919.06	1862.24	2256.74
ENSMUSG00000008461	Fut1	17.5744	-160.044	1.58559	-4.61804	3.87373e-06	0.000285496	0	0	0	0	55.0507	0	17.3766	27.9694	20.7649	34.4624	28.6971	26.5722
ENSMUSG00000024594	Prrc1	1569.21	-1.77285	0.178833	-4.61924	3.85157e-06	0.000285496	1158.54	957.524	857.432	987.296	1794.65	1641.53	1889.08	1695.88	2191.39	1435.6	2093.87	2127.68
ENSMUSG00000026830	Ermn	21.747	-212.34	1.67382	-4.61831	3.86879e-06	0.000285496	0	0	0	0	14.6802	5.46812	54.6122	58.7357	35.9925	18.7081	72.7677	0
NA	NA	177.709	-7.42952	0.627763	-4.60886	4.04892e-06	0.000296392	57.5735	5.19184	47.4284	47.378	152.307	357.615	525.021	133.321	390.381	151.634	139.386	125.269
ENSMUSG00000034783	Cd207	1002.24	4.22763	0.451766	4.60382	4.14801e-06	0.000301608	2325.16	2478.73	1221.98	1474.83	555.094	609.149	143.978	465.224	350.235	1151.04	328.992	922.436
ENSMUSG00000024042	Sik1	8219.6	-2.05005	0.22512	-4.60049	4.21508e-06	0.000304441	3711.98	5390.62	5551.92	4821.09	11365.2	6787.03	12241.8	9533.82	9428.66	7188.85	11782.2	10832
ENSMUSG00000028657	Ppt1	41440.8	1.5641	0.140369	4.59741	4.27773e-06	0.00030692	52569.7	51962.2	45887.5	55204.5	33235	39544.4	29215	29470.4	40422.4	42026.4	41602.6	36149.6
ENSMUSG00000029840	Mtpn	8881.38	1.6802	0.162977	4.59351	4.35861e-06	0.000308635	12060.1	12171.9	9203.9	10422.4	7003.36	6740.01	5149.68	7207.7	8645.13	8735.72	10628.2	8608.45
ENSMUSG00000079419	Ms4a6c	1074.58	2.25978	0.256008	4.59432	4.34159e-06	0.000308635	2446.37	1527.14	1432.15	1419.81	806.493	867.244	584.598	760.767	930.269	938.361	554.47	627.295
NA	NA	1017.8	-3.15511	0.361318	-4.5879	4.47732e-06	0.000314982	167.67	510.284	393.377	506.639	1566.19	687.89	1220.09	1507.55	1698.57	963.962	1911.43	1079.97
ENSMUSG00000032553	Srprb	3383.36	-1.89242	0.201493	-4.56707	4.94586e-06	0.0003457	2678.68	2057.45	2075.69	1871.43	3520.49	3989.54	4972.19	3949.27	4481.07	2730.41	3840.29	4433.77
ENSMUSG00000003484	Cyp4f18	2290.4	-3.4179	0.388396	-4.56521	4.98986e-06	0.000346539	1055.51	479.133	829.532	595.282	2569.03	2436.6	2702.06	2404.43	7748.09	2231.19	1681.86	2752.12
ENSMUSG00000067610	Klri1	1136.06	2.43244	0.282336	4.54211	5.56942e-06	0.000384325	2211.03	1797.12	1408.9	1515.33	898.244	1030.19	405.868	514.636	967.646	1012.21	1013.62	857.904
ENSMUSG00000000594	Gm2a	43019.5	1.67713	0.164294	4.5406	5.60938e-06	0.000384633	67013.6	57168.9	43559.8	60397.8	35674.7	39348.6	29823.2	31183	38772.3	40152.6	39289.5	33850.2
ENSMUSG00000026728	Vim	16845.1	1.52537	0.13442	4.53176	5.84937e-06	0.000398566	22406.2	19789.8	19788.8	23799.8	13768.2	15660.7	13839.2	12971.3	13422.4	14269.4	15321.2	17104
ENSMUSG00000050957	Insl6	548.902	-3.91361	0.434882	-4.52651	5.99647e-06	0.000406036	203.022	84.5529	175.764	240.711	450.498	690.077	980.537	633.972	1643.2	498.228	503.225	483.045
ENSMUSG00000031132	Cd40lg	212.859	-2.22943	0.255923	-4.51961	6.19523e-06	0.000416889	145.449	118.671	156.235	120.737	251.398	344.492	269.337	339.362	200.728	153.604	239.826	214.476
ENSMUSG00000044033	Ccdc141	52.9272	-6.44592	0.596237	-4.50892	6.51579e-06	0.000435754	19.1912	14.0921	11.1596	9.16993	107.349	103.894	93.0889	40.0894	88.597	17.7235	61.4939	69.2776
ENSMUSG00000038742	Angptl6	134.438	-3.66243	0.415579	-4.50649	6.59096e-06	0.000438077	73.7345	52.6601	52.0783	60.3687	204.605	279.968	224.655	165.019	78.9067	232.375	115.813	73.0736
ENSMUSG00000073538	E330020D12Rik	582.176	-2.18347	0.250175	-4.50333	6.68966e-06	0.000441926	397.964	279.618	361.758	453.912	638.588	657.268	1040.11	924.854	718.466	533.675	468.378	511.516
ENSMUSG00000031618	Nr3c2	66.7889	-8.3976	0.682708	-4.49676	6.89955e-06	0.000453029	10.1006	9.64199	0	12.2266	102.761	32.8087	40.9591	93.2312	83.0597	147.696	172.183	96.7989
ENSMUSG00000003575	Crtc1	371.387	-2.28586	0.265944	-4.48492	7.29409e-06	0.000476049	211.103	167.622	212.963	217.022	619.32	340.117	390.973	495.99	458.213	448.996	568.818	325.51
ENSMUSG00000064158	Izumo1	62.9806	-19.6666	0.962232	-4.46636	7.9561e-06	0.000513074	12.1207	6.67523	0	0	81.6585	32.8087	112.948	137.982	23.5336	37.4163	157.834	152.79
ENSMUSG00000018168	Ikzf3	2479.09	-2.15788	0.24843	-4.46649	7.95115e-06	0.000513074	1697.91	1399.57	1049.01	1013.28	2989.25	2264.9	2834.87	3043.07	3557.72	2162.27	4639.71	3097.56
ENSMUSG00000090946	Ccdc71l	1140.6	-1.80099	0.190097	-4.46504	8.00551e-06	0.000513205	667.651	657.881	899.28	753.463	1214.79	1477.49	1496.87	1175.65	1568.44	1187.48	1476.88	1111.29
ENSMUSG00000024487	Yipf5	1830.95	-1.73796	0.178678	-4.46275	8.09156e-06	0.000514291	1209.04	1125.15	1075.97	1438.15	1742.35	2081.17	2544.43	2061.34	2368.59	1775.3	2184.06	2365.88
ENSMUSG00000038886	Man2a2	2634.63	-2.45376	0.290223	-4.46206	8.11738e-06	0.000514291	1028.24	1722.95	1206.17	939.154	4257.25	1739.96	2726.88	3291.06	5025.11	2723.51	3767.52	3187.72
ENSMUSG00000031755	Bbs2	477.153	-2.27023	0.265659	-4.45247	8.48875e-06	0.000534693	382.814	195.807	313.4	239.182	711.989	497.599	754.641	600.409	512.202	397.794	630.312	489.688
ENSMUSG00000040740	Slc25a34	54.1844	-8.78633	0.704398	-4.45098	8.54787e-06	0.000535304	0	18.5423	6.50978	6.87745	46.7931	74.3665	84.4006	80.1788	95.5187	127.018	50.22	59.7875
ENSMUSG00000032468	Armc8	1181.99	1.5897	0.15042	4.44591	8.7522e-06	0.00054495	1496.91	1539.01	1337.3	1829.4	876.223	956.921	1056.25	1014.36	975.952	1054.55	1050.52	996.459
ENSMUSG00000084997	Gm15471	37.5296	-18.2558	0.943629	-4.44061	8.97058e-06	0.000555356	0	0	6.50978	9.16993	48.6281	50.3067	136.53	53.1418	62.2948	17.7235	46.1204	19.9292
ENSMUSG00000001467	Cyp51	2076.86	1.62474	0.158036	4.43072	9.39203e-06	0.000578144	3020.09	2406.05	2413.27	1989.88	1504.72	1583.57	1406.26	1553.23	2515.32	2198.7	2102.07	2229.22
ENSMUSG00000096883	Shisa8	205.076	-4.56857	0.495815	-4.42049	9.84793e-06	0.000599396	106.057	34.1178	53.0082	38.9722	180.75	208.882	409.591	258.25	586.955	204.805	229.577	149.943
ENSMUSG00000002731	Prkra	1073.75	1.70792	0.174684	4.42078	9.83462e-06	0.000599396	1213.08	1389.19	1545.61	1726.24	751.442	991.917	868.83	828.825	1025.79	825.128	887.561	831.331
ENSMUSG00000027808	Serp1	25243.1	-1.99265	0.225085	-4.41915	9.90882e-06	0.000599733	17766	13241.4	13598	14437.3	22557	27150.3	36646	31297.7	40779.5	20153.6	34487.8	30802
ENSMUSG00000027230	Creb3l1	151.422	-4.9103	0.522894	-4.39059	1.13045e-05	0.000680404	17.1711	33.3761	46.4985	60.3687	144.967	80.9282	265.614	283.423	355.772	108.31	259.299	161.331
ENSMUSG00000106333	4930428O21Rik	72.1498	-15.762	0.906776	-4.38739	1.1472e-05	0.000686671	15.1509	0	0	9.9341	99.0912	121.392	130.324	41.0217	185.5	153.604	72.7677	37.0113
ENSMUSG00000063171	Rps4l	411.902	2.86848	0.346613	4.38612	1.15389e-05	0.000686882	1013.09	642.305	437.085	865.03	187.172	361.99	244.514	237.74	286.556	337.731	157.834	171.771
ENSMUSG00000031591	Asah1	6618.2	1.66869	0.168524	4.38345	1.16813e-05	0.000691558	10034	7927.94	7616.45	8760.34	4576.55	5648.57	5230.36	5123.05	6758.29	7060.85	6024.35	4657.73
ENSMUSG00000044350	Lacc1	1399.38	1.83944	0.200927	4.37603	1.20862e-05	0.000711639	1767.61	2005.53	1767.87	2139.65	1328.56	1029.1	880.001	936.974	906.735	1238.68	1472.78	1319.12
ENSMUSG00000025330	Padi4	140	-3.40027	0.404744	-4.36238	1.28656e-05	0.000753438	39.3924	69.719	50.2183	77.9444	272.501	199.04	198.59	138.914	188.269	212.682	156.809	75.9207
ENSMUSG00000049764	Zfp280b	799.857	-2.94352	0.358379	-4.34607	1.38597e-05	0.000802979	246.455	392.355	240.862	370.618	802.822	508.535	1386.4	985.454	880.433	713.864	1966.78	1103.7
ENSMUSG00000087305	A430035B10Rik	290.407	-3.08943	0.37444	-4.34607	1.38598e-05	0.000802979	101.006	80.1027	142.285	171.936	256.903	367.458	593.287	314.189	553.731	384.009	255.2	264.773
ENSMUSG00000039195	1110008P14Rik	1224.7	-1.89716	0.212694	-4.34353	1.40209e-05	0.000807989	789.869	738.725	803.493	949.852	1427.65	1932.43	1542.79	1324.82	1698.57	1350.93	949.055	1188.16
ENSMUSG00000048218	Amigo2	56.341	-9.06948	0.732996	-4.33975	1.42644e-05	0.000817674	0	14.0921	19.5294	5.34913	88.0811	65.6175	73.2299	127.727	91.3657	27.5699	80.9669	82.5637
ENSMUSG00000030304	Ergic2	77.8411	-4.03302	0.463837	-4.33742	1.44162e-05	0.000822025	22.2214	32.6344	25.1092	51.963	76.1534	99.5198	156.389	202.312	47.0672	69.9094	75.8424	74.9717
ENSMUSG00000041857	Oosp1	2746.4	-6.08414	0.601481	-4.33107	1.48388e-05	0.000841696	934.307	210.64	652.838	490.591	2629.59	4161.24	4711.54	2417.49	9813.5	2753.05	1713.63	2468.37
ENSMUSG00000069873	4930438A08Rik	12.2294	-219.796	1.79695	-4.32957	1.49402e-05	0.000843033	0	0	0	0	47.7106	61.243	19.859	9.32312	0	0	1.0249	7.59207
ENSMUSG00000020766	Galk1	976.105	-2.12942	0.252209	-4.32365	1.5347e-05	0.000857059	750.476	373.813	526.363	712.962	1268.92	1217.2	1516.73	1029.27	1378.79	1019.1	855.79	1063.84
ENSMUSG00000003411	Rab3b	142.01	-7.05538	0.651838	-4.32427	1.53037e-05	0.000857059	25.2516	5.19184	31.619	42.793	195.43	132.329	237.066	174.342	491.437	226.467	74.8175	67.3796
ENSMUSG00000038208	Pgap3	357.64	-1.97501	0.227741	-4.31132	1.62283e-05	0.000901627	215.143	203.965	240.862	267.456	490.869	448.386	526.263	367.331	358.541	312.131	486.826	373.909
ENSMUSG00000022947	Cbr3	465.006	2.12493	0.25251	4.30643	1.65913e-05	0.000917091	823.201	510.284	610.99	953.673	313.789	379.488	259.408	410.217	293.478	362.347	331.042	332.153
ENSMUSG00000032648	Pygm	164.617	-3.61394	0.431144	-4.2992	1.71419e-05	0.000942716	62.6239	70.4607	50.2183	19.104	200.935	108.269	170.042	250.792	346.082	187.081	297.22	212.578
NA	NA	781.924	-2.30734	0.280754	-4.29639	1.73599e-05	0.000949883	336.351	512.509	530.082	458.497	1183.59	1129.71	990.466	936.974	1367.72	588.814	638.511	709.858
ENSMUSG00000023243	Kcnk5	547.069	-2.95567	0.365761	-4.27461	1.91473e-05	0.00104242	336.351	129.054	307.82	176.521	964.304	426.514	809.253	603.206	898.429	399.764	780.972	732.634
ENSMUSG00000002778	Kdelr1	3314.62	-1.81192	0.200785	-4.27085	1.94728e-05	0.00105484	2481.72	1978.83	2008.73	2583.63	3330.57	4591.04	4731.4	3751.62	4770.4	2906.66	3250.98	3389.86
ENSMUSG00000023132	Gzma	2006.52	2.12385	0.255403	4.25478	2.09255e-05	0.0011279	4090.75	2699.76	2828.97	3873.53	1072.57	1714.8	1674.36	1891.66	1005.02	1115.6	1418.46	692.776
ENSMUSG00000014496	Ankrd28	677.854	-2.86055	0.357029	-4.24697	2.16676e-05	0.00116211	104.036	284.81	326.419	132.2	759.699	427.607	608.181	629.311	1312.34	904.884	1638.81	1005.95
ENSMUSG00000029185	Fam114a1	271.742	-2.24471	0.274773	-4.24543	2.18171e-05	0.00116436	113.127	142.405	147.865	172.7	349.572	372.926	310.296	261.98	384.843	220.559	368.963	415.666
ENSMUSG00000073423	Zfp414	12.0994	-151.722	1.71013	-4.23668	2.26847e-05	0.00120474	0	0	0	0	27.5253	34.996	27.3061	5.59387	0	29.5392	4.09959	16.1331
ENSMUSG00000027579	Srms	184.509	-6.8508	0.656992	-4.22573	2.38167e-05	0.00125868	46.4629	77.8776	6.50978	25.9815	199.1	146.546	423.244	307.663	445.754	48.2473	241.876	244.844
ENSMUSG00000010830	Kdelr3	124.59	-7.65539	0.695218	-4.22382	2.40192e-05	0.00126322	10.1006	53.4018	38.1287	0.764161	138.544	182.635	289.196	175.275	164.735	99.4486	195.755	147.096
ENSMUSG00000008475	Arpc5	15279.9	1.55452	0.150924	4.21717	2.47392e-05	0.00128858	23222.3	18368	17157	20749.3	11735.9	14186.5	12567	12649.6	13709	15093.5	11232.9	12688.2
NA	NA	11.5282	-195.987	1.80539	-4.21771	2.46792e-05	0.00128858	0	0	0	0	24.7728	8.749	57.0945	32.6309	0	6.89248	8.19918	0
ENSMUSG00000040841	Six5	136.389	-7.09979	0.671924	-4.20848	2.57097e-05	0.00133272	0	54.8852	46.4985	16.8115	207.358	179.354	248.237	206.973	192.422	117.172	175.258	191.7
ENSMUSG00000035227	Spcs2	13728.4	-2.06404	0.248534	-4.20656	2.5929e-05	0.00133769	11136.9	6940.75	7321.65	7304.62	12805.7	17414.9	22335.1	14945.9	23613.9	13473.8	12976.2	14471.4
ENSMUSG00000034126	Pomt2	412.281	-2.20645	0.271788	-4.20079	2.6598e-05	0.0013657	183.831	206.19	242.722	267.456	447.746	413.39	538.675	587.357	426.373	341.67	594.441	697.521
ENSMUSG00000032557	Uba5	2592.36	-1.87854	0.21678	-4.19602	2.71641e-05	0.00138819	2071.64	1619.85	1167.11	1637.6	2557.1	3138.7	3232.05	3275.21	3633.86	2159.31	3234.58	3381.32
ENSMUSG00000022610	Mapk12	192.628	-3.50011	0.432185	-4.18201	2.88947e-05	0.0014697	43.4327	52.6601	128.336	61.1329	164.235	287.623	346.291	201.379	422.22	182.158	227.527	194.547
ENSMUSG00000074580	4931440P22Rik	127.643	-3.59999	0.442392	-4.17728	2.95014e-05	0.00149354	32.322	62.3021	43.7085	67.2462	249.563	164.044	208.519	120.268	238.105	71.8787	159.884	113.881
ENSMUSG00000020009	Ifngr1	15206.7	1.44229	0.126591	4.17373	2.99651e-05	0.00150996	19024.5	17667.8	19588.9	21660.1	11992.8	14199.6	13039.9	14807.9	11707.3	13434.4	12151.2	13206.4
ENSMUSG00000048621	Gm6377	8086.19	1.95502	0.232137	4.16643	3.09413e-05	0.00155194	8048.18	8238.71	14658.2	13461.5	4713.26	6873.43	5258.9	5868.9	7076.69	8696.34	8253.5	5886.7
ENSMUSG00000044678	Ly6k	987.218	-4.13214	0.491648	-4.16332	3.13652e-05	0.00156595	657.55	173.556	146.005	372.911	1113.86	1473.11	1946.18	1043.26	1106.08	1003.35	394.586	2416.18
ENSMUSG00000023393	Slc17a9	453.761	-2.19839	0.273798	-4.15069	3.31471e-05	0.00164732	330.29	215.832	152.515	306.429	442.24	564.31	635.487	567.778	631.254	448.011	510.399	640.581
ENSMUSG00000005533	Igf1r	652.479	-2.23227	0.279717	-4.14172	3.44717e-05	0.00170533	257.566	379.004	360.828	248.352	1011.1	558.842	477.856	731.865	834.75	746.357	1162.23	1060.99
ENSMUSG00000029299	Abcg3	4081.72	2.01028	0.243499	4.13715	3.51644e-05	0.00173169	8078.48	7146.2	3991.43	4719.46	2849.79	2442.06	2673.51	3939.95	2821.26	3824.34	3462.1	3032.08
ENSMUSG00000037622	Wdtc1	1402.8	-1.98122	0.238806	-4.13051	3.61966e-05	0.00177445	752.496	811.411	1070.39	515.809	1999.26	1356.09	1481.98	1401.26	2192.78	1621.7	2031.35	1599.08
ENSMUSG00000102716	Gm5099	16.3756	-159.686	1.77489	-4.12369	3.72846e-05	0.00181956	0	0	0	0	1.83502	12.0299	52.1298	34.4955	11.0746	53.1705	31.7718	0
ENSMUSG00000039891	Txlnb	229.495	-3.54617	0.443599	-4.11691	3.83979e-05	0.00186549	36.3622	48.9517	118.106	26.7456	223.873	203.414	196.107	191.124	415.299	260.929	673.358	359.674
ENSMUSG00000038539	Atf5	75.7603	-6.70362	0.667397	-4.1129	3.90715e-05	0.00188973	0	11.1254	26.9691	28.274	107.349	118.111	145.219	76.4496	107.978	117.172	85.0665	85.4108
ENSMUSG00000005338	Cadm3	253.372	2.48404	0.319345	4.11057	3.94687e-05	0.00190046	363.622	299.643	337.579	484.478	189.007	166.231	143.978	98.8251	303.168	160.496	191.656	301.785
ENSMUSG00000032484	Ngp	2838.04	-8.75658	0.763096	-4.10219	4.09255e-05	0.00196189	121.207	1027.24	726.306	1060.66	11699.2	9524.38	2672.27	1811.48	1932.52	715.833	2114.36	651.02
ENSMUSG00000053334	Ficd	703.655	-2.74887	0.356056	-4.09722	4.18144e-05	0.00198707	489.88	235.116	212.963	299.551	670.701	475.727	1290.83	963.078	1065.93	567.152	1136.61	1036.32
ENSMUSG00000025169	Ogfod3	629.645	-2.49496	0.321932	-4.0972	4.18175e-05	0.00198707	324.23	283.326	351.528	326.297	652.351	760.069	1050.04	744.917	1396.79	492.32	524.748	649.122
ENSMUSG00000059639	Clec4a4	168.607	3.16698	0.407078	4.08548	4.39859e-05	0.00208098	357.562	277.393	218.543	331.646	83.4935	104.988	115.43	70.8557	94.1343	222.529	71.7428	74.9717
ENSMUSG00000035711	Dok3	1823.23	-1.9818	0.241681	-4.08313	4.44326e-05	0.00209297	1346.41	860.362	1254.53	1344.16	2037.79	2427.85	2520.85	2535.89	2817.11	1367.66	1550.67	1815.45
ENSMUSG00000036594	H2-Aa	206388	1.83822	0.215291	4.07962	4.51102e-05	0.00210657	356797	259974	245640	345455	152315	219662	149272	135837	161062	192869	116459	141311
ENSMUSG00000048138	Dmrt2	49.5775	-20.4035	1.06645	-4.07967	4.50994e-05	0.00210657	0	0	14.8795	0	66.0608	39.3705	117.913	75.5173	128.743	48.2473	61.4939	42.7054
ENSMUSG00000017400	Stac2	501.674	-3.50832	0.444289	-4.07568	4.58799e-05	0.00213332	168.68	124.604	177.624	95.5201	502.796	462.603	570.945	449.374	2026.66	390.902	561.644	488.739
ENSMUSG00000060509	Xcr1	6821.17	1.6684	0.181826	4.0614	4.87801e-05	0.00225848	7710.81	7663.9	8587.34	9704.08	4561.87	5878.23	4913.85	4825.65	6164.41	6869.83	9275.32	5698.8
ENSMUSG00000071552	Tigit	675.088	-2.04344	0.253964	-4.05964	4.9149e-05	0.00226587	380.793	446.498	481.724	518.101	767.957	785.222	1390.13	793.398	757.228	468.688	702.055	609.263
ENSMUSG00000090164	BC035044	1848.2	1.55951	0.158001	4.05751	4.95991e-05	0.00227693	2795.85	2544.74	2214.26	2540.84	1594.63	1831.82	1665.67	1382.62	1299.88	1614.81	1461.5	1231.81
ENSMUSG00000030802	Bckdk	2430.4	-1.77455	0.204806	-4.04021	5.3404e-05	0.00244126	1561.56	1349.14	1784.61	1731.59	2737.85	3039.18	2771.57	2855.67	3783.37	1941.71	2523.3	3085.23
ENSMUSG00000055912	Tmem150a	321.039	-3.41046	0.43823	-4.0389	5.37022e-05	0.00244458	295.948	118.671	51.1483	98.5768	371.592	474.633	678.928	397.165	449.907	306.223	274.673	335
ENSMUSG00000004951	Hspb1	110.898	-4.19517	0.513018	-4.03247	5.51947e-05	0.002502	44.4427	48.9517	17.6694	32.0948	104.596	86.3963	194.866	215.364	51.2202	184.128	178.332	172.72
ENSMUSG00000039031	Arhgap18	2160.62	1.61669	0.171946	4.03057	5.5641e-05	0.00251173	2355.46	2858.48	2518.36	2538.54	1643.26	1551.85	1375.23	1781.65	1824.54	2790.47	2544.82	2144.76
ENSMUSG00000026153	Fam135a	219.695	-3.19913	0.416471	-4.02832	5.61763e-05	0.00252537	27.2717	102.353	66.0278	106.218	290.851	165.137	224.655	288.084	411.146	278.653	451.98	223.966
ENSMUSG00000031995	St14	963.97	-2.26676	0.293178	-4.02701	5.64913e-05	0.00252904	558.564	325.603	561.701	504.346	1090	954.734	1367.79	1006.9	1969.9	751.28	1421.53	1055.3
ENSMUSG00000030160	Tmem52b	11.5937	176.662	1.85676	4.02037	5.81075e-05	0.00259069	74.7446	14.8338	14.8795	30.5664	0	0	0	0	0	0	4.09959	0
ENSMUSG00000046961	Gpr156	12.7132	131.518	1.75399	4.01319	5.99038e-05	0.00265723	64.644	6.67523	5.57981	23.689	0	0	0	0	17.9963	0	10.249	23.7252
ENSMUSG00000086370	Ftx	483.183	-2.9428	0.388089	-4.01245	6.00906e-05	0.00265723	64.644	199.515	340.369	198.682	553.259	535.876	763.329	512.772	881.817	711.894	496.05	539.986
ENSMUSG00000030082	Sec61a1	12106.3	-1.72488	0.196181	-4.00905	6.09637e-05	0.00268488	9550.14	7853.03	6766.46	7601.88	13099.3	12398.4	16135.4	13168.9	15366	9858.21	17251.1	16227.1
ENSMUSG00000025150	Cbr2	231.185	3.66882	0.468279	4.0047	6.2097e-05	0.00272372	668.661	552.56	284.571	258.286	156.894	143.265	71.9888	108.148	177.194	205.79	48.1702	98.6969
ENSMUSG00000094910	D430019H16Rik	75.9098	-12.8215	0.920735	-3.99735	6.40564e-05	0.00279833	0	18.5423	19.5294	0	179.832	48.1195	136.53	124.93	91.3657	175.266	52.2698	64.5326
ENSMUSG00000035237	Lcat	13.8998	-108.091	1.69335	-3.98979	6.61328e-05	0.00287744	0	0	0	0	36.7005	10.9362	9.92948	10.2554	48.4515	32.4931	0	18.0312
ENSMUSG00000022848	Slc49a4	988.38	-1.77665	0.20794	-3.9875	6.67741e-05	0.00289372	785.828	735.758	709.566	560.13	1055.14	1120.97	1575.06	1208.28	1205.75	864.513	1168.38	871.19
ENSMUSG00000027187	Cat	5061.87	1.60925	0.172393	3.98153	6.84727e-05	0.00295551	7832.02	6990.44	5251.54	6403.67	4436.17	4312.16	3305.28	4397.72	4087.92	5192.99	4408.09	4124.39
ENSMUSG00000032478	Nme6	325.96	-2.19247	0.28503	-3.97347	7.0833e-05	0.00304526	153.529	143.888	200.873	289.617	390.86	447.292	517.574	373.857	376.537	252.068	365.888	399.533
ENSMUSG00000007029	Vars	9486.68	-1.79516	0.213045	-3.96213	7.42831e-05	0.00318096	3716.02	6609.96	7300.26	5417.14	11719.4	8029.39	10502.9	11116	12533.7	10844.8	13909.9	12140.7
ENSMUSG00000047264	Zfp358	243.174	-2.21513	0.289971	-3.95692	7.59227e-05	0.00323837	132.318	89.7447	119.036	212.437	270.666	306.215	327.673	322.58	326.702	284.561	274.673	251.487
ENSMUSG00000021678	F2rl1	395.754	-3.50135	0.457511	-3.95163	7.7622e-05	0.00328499	43.4327	131.279	252.022	136.021	504.631	442.918	523.78	499.719	1007.79	263.883	426.357	517.21
ENSMUSG00000021701	Plk2	678.514	2.09397	0.269777	3.95232	7.73976e-05	0.00328499	1391.87	727.6	997.857	960.551	579.867	307.308	629.281	430.728	580.034	577.983	495.026	464.065
ENSMUSG00000034265	Zdhhc14	564.785	-1.7837	0.212465	-3.92947	8.51344e-05	0.00358889	333.321	347.112	417.556	442.449	733.092	748.039	789.394	479.208	685.243	638.046	583.167	580.793
ENSMUSG00000056167	Cnot10	1896.17	-1.53945	0.158646	-3.92327	8.73553e-05	0.00366825	1287.83	1249.75	1358.68	1384.66	2176.34	1835.1	1971	2146.18	1805.16	2399.57	2729.3	2410.48
ENSMUSG00000024018	Ccdc167	354.92	-2.16725	0.284526	-3.92184	8.78741e-05	0.00367578	157.57	132.763	221.333	171.936	376.18	265.751	433.174	405.556	401.455	461.796	752.275	479.249
ENSMUSG00000073490	Ifi207	1423.35	2.45746	0.331064	3.91818	8.92215e-05	0.00371779	2858.48	3382.86	970.888	1570.35	1065.23	830.061	661.552	1016.22	931.653	1282.99	1420.51	1089.46
ENSMUSG00000003526	Prodh	257.132	-2.17382	0.286519	-3.9098	9.23728e-05	0.00383436	175.751	131.279	159.955	113.86	353.242	370.739	208.519	327.242	397.302	233.36	299.27	315.071
ENSMUSG00000028334	Nans	4215.2	-1.67846	0.191143	-3.90881	9.27528e-05	0.00383544	3377.65	2541.78	3130.28	3442.55	4297.62	5718.56	6335.01	4617.74	5440.41	3787.91	3767.52	4125.34
ENSMUSG00000047694	Yipf6	1433.42	-1.57668	0.168336	-3.90226	9.52988e-05	0.00392573	1151.47	1076.94	878.821	816.124	1474.44	1405.31	1683.05	1622.22	1819.01	1551.79	1729	1992.92
ENSMUSG00000036026	Tmem63b	529.075	-1.83917	0.225513	-3.89802	9.69816e-05	0.00397992	268.677	327.828	346.878	320.184	703.731	398.079	598.251	623.717	830.597	638.046	696.93	595.977
ENSMUSG00000059708	Akap17b	286.365	-3.21262	0.433517	-3.88393	0.00010278	0.00418617	44.4427	86.7779	139.495	64.1895	164.235	265.751	300.367	345.888	735.078	216.621	643.636	429.901
ENSMUSG00000079547	H2-DMb1	10373.6	1.61924	0.178987	3.88471	0.000102451	0.00418617	14753	13653.1	12611.3	15512.5	9207.23	10770	8111.15	6823.59	7993.11	10218.6	7155.84	7673.68
ENSMUSG00000047986	Palm3	50.2132	-19.0049	1.09409	-3.88295	0.000103198	0.00418746	0	0	0	17.5757	42.2055	80.9282	99.2948	117.471	58.1418	20.6774	92.2408	74.0227
ENSMUSG00000029311	Hsd17b11	6451.58	1.7154	0.200562	3.88183	0.000103673	0.00419101	11678.3	8995.24	6038.29	7856.34	4573.79	5882.61	4459.58	5234.93	5390.58	6358.8	5290.52	5659.89
ENSMUSG00000070282	3000002C10Rik	91.0724	-3.05654	0.415556	-3.8789	0.00010493	0.00422606	56.5635	33.3761	50.2183	29.8023	122.029	152.014	84.4006	158.493	99.6717	63.0169	145.535	97.7479
ENSMUSG00000053835	H2-T24	1155.16	-2.14205	0.283521	-3.87624	0.000106084	0.00425671	639.369	664.556	683.527	426.402	1437.74	997.386	1431.09	1303.37	2256.46	876.329	1842.77	1302.99
ENSMUSG00000021917	Spcs1	7839.66	-2.32433	0.314056	-3.87451	0.00010684	0.00427124	5094.75	3977.69	4492.68	4445.13	6934.55	12686	14070.1	8171.71	15352.2	7055.93	5138.84	6656.34
ENSMUSG00000024371	C2	516.426	3.62528	0.480074	3.87042	0.000108647	0.00432749	1396.92	1266.07	344.089	565.479	200.935	172.793	208.519	402.759	315.627	161.481	460.179	702.266
ENSMUSG00000018102	H2bc4	845.668	-2.07998	0.273134	-3.86831	0.000109594	0.00434919	709.064	353.787	384.077	583.819	1062.48	997.386	1148.1	1014.36	1385.71	977.747	702.055	829.433
ENSMUSG00000024548	Setbp1	341.367	-4.08976	0.525419	-3.86742	0.000109994	0.00434919	29.2918	141.663	51.1483	50.4346	485.364	89.6772	271.82	270.37	679.705	417.487	1114.06	495.382
ENSMUSG00000013419	Zfp651	106.632	-6.30757	0.68741	-3.86536	0.000110928	0.00436056	11.1107	48.9517	2.78991	25.9815	212.863	69.992	209.76	71.788	152.276	69.9094	241.876	162.28
ENSMUSG00000016526	Dyrk3	880.885	-3.46882	0.46428	-3.86501	0.000111087	0.00436056	95.9559	216.574	676.088	379.024	834.935	963.483	2033.06	913.666	1679.19	827.097	1094.59	856.955
ENSMUSG00000022365	Derl1	7145.93	-1.59956	0.175424	-3.86307	0.000111973	0.00436371	5735.13	4908.52	4703.78	4758.43	6897.85	7716.61	9193.46	8352.58	9907.64	6163.84	8252.48	9160.78
ENSMUSG00000061313	Ddhd2	25.394	25.442	1.20843	3.8638	0.000111639	0.00436371	16.161	16.3172	31.619	12.2266	0	0	0	2.79694	123.205	21.6621	52.2698	28.4703
ENSMUSG00000020120	Plek	25086.7	1.76495	0.212296	3.86079	0.000113023	0.00438885	38609.6	36305.1	24311.3	24269	19954	18991.9	12701.1	18321.8	21929.1	28073.1	30647.5	26927.2
ENSMUSG00000036478	Btg1	20526.4	1.41515	0.129791	3.85972	0.000113517	0.00439231	27068.7	22813	25740.6	28467.3	18078.6	18263.5	18491.2	18719.9	16488.7	20161.5	15465.7	16558.3
ENSMUSG00000033355	Rtp4	391.295	2.04765	0.268057	3.85726	0.000114663	0.00442086	551.494	832.178	614.71	596.046	199.1	334.649	398.421	336.565	174.425	226.467	252.125	179.363
ENSMUSG00000022831	Hcls1	22473.5	1.56741	0.16833	3.85188	0.000117216	0.00450327	37575.3	27781.5	25469.1	31277.9	20199.9	21658.1	17957.5	18085	16850	20805.4	14585.3	17437.1
NA	NA	852.239	1.88277	0.237111	3.84991	0.00011816	0.00452349	1037.33	1025.02	1239.65	1528.32	554.177	696.639	597.01	717.88	668.631	945.254	478.627	738.329
ENSMUSG00000039050	Osbpl2	995.792	-1.59796	0.175912	-3.84418	0.000120959	0.00461431	726.235	678.648	661.208	699.207	1001	1045.51	1292.07	1081.48	1409.25	917.684	1194.01	1243.2
NA	NA	16.8276	-151.764	1.88643	-3.84095	0.000122557	0.00465889	0	0	0	0	52.2981	0	0	42.8864	11.0746	26.5853	35.8714	33.2153
ENSMUSG00000073436	Eme2	390.917	-1.96636	0.254329	-3.8357	0.00012521	0.00474308	293.928	206.932	321.769	224.663	459.673	481.195	630.522	486.667	498.358	300.315	451.98	335
ENSMUSG00000049881	2810025M15Rik	509.137	2.11122	0.281217	3.83362	0.000126273	0.0047667	1186.82	691.257	668.648	881.078	311.036	461.51	341.326	509.042	322.549	178.22	258.274	299.887
ENSMUSG00000020572	Nampt	6670.02	1.6936	0.199361	3.81267	0.000137475	0.00517153	10218.8	10126.3	6097.81	7681.35	5633.52	5811.52	4026.41	4676.48	6258.55	6755.61	7076.92	5676.97
ENSMUSG00000036599	Chst12	832.866	-1.81086	0.224965	-3.80804	0.000140071	0.00525095	557.554	575.553	390.587	536.441	864.296	762.256	1087.28	1018.08	1394.02	814.297	1014.65	979.377
ENSMUSG00000066952	Myo1h	71.0205	-11.6307	0.930929	-3.80251	0.00014324	0.00535125	0	12.6088	24.1792	0.764161	159.647	78.741	34.7532	163.155	65.0634	25.6006	169.108	118.626
ENSMUSG00000085779	Atcayos	10.8413	-176.028	1.96769	-3.79108	0.000149994	0.0055843	0	0	0	0	7.34009	8.749	69.5064	25.1724	15.2276	0	4.09959	0
ENSMUSG00000009739	Pou6f1	1365.27	-2.33332	0.322834	-3.78641	0.000152839	0.00567073	832.291	1026.5	629.589	349.986	2256.16	937.236	1849.37	1579.34	2154.02	1717.21	1479.95	1571.56
ENSMUSG00000079111	Kdelr2	2367.88	-1.61499	0.183203	-3.77463	0.000160245	0.00590508	1688.82	1688.09	1730.67	1692.62	2016.69	2971.38	3421.95	2575.05	2804.65	2161.28	2776.45	2886.88
ENSMUSG00000033487	Fndc3a	4123.75	-2.27334	0.313882	-3.77471	0.000160195	0.00590508	1656.5	2442.39	1169.9	1162.29	3802.17	2451.91	3528.69	4837.77	8192.46	4046.87	10179.3	6014.82
ENSMUSG00000043154	Ppp2r3a	12.1012	85.1436	1.69986	3.77197	0.000161964	0.00594821	20.2012	5.93353	21.3893	17.5757	0	0	0	0	42.9142	0	15.3735	21.8272
ENSMUSG00000039512	Uhrf1bp1	382.887	-2.05874	0.276802	-3.76356	0.000167512	0.00613118	173.731	251.434	244.582	180.342	500.044	317.151	433.174	499.719	361.31	668.57	556.519	408.074
ENSMUSG00000019909	Fam162b	53.4609	-15.4856	1.05122	-3.76026	0.000169736	0.00619165	11.1107	0	10.2297	0	15.5977	72.1792	214.725	22.3755	103.825	40.3702	79.942	71.1756
ENSMUSG00000051985	Igfn1	23.7579	-95.5537	1.74985	-3.75932	0.000170377	0.00619418	0	0	0	0	15.5977	0	44.6827	0	42.9142	65.9708	53.2947	62.6346
ENSMUSG00000032281	Acsbg1	254.677	-2.56686	0.361951	-3.75743	0.000171666	0.00622015	98.9861	116.446	158.095	235.362	284.429	334.649	534.951	411.15	160.582	156.558	272.623	292.295
ENSMUSG00000032501	Trib1	9060.94	-1.87825	0.242165	-3.75525	0.000173166	0.00625362	6304.81	5478.14	4183.93	3833.03	11518.4	6662.36	9727.17	9279.3	15514.2	8407.84	14944	12878
ENSMUSG00000039063	Echdc3	41.8767	-7.98015	0.798835	-3.75098	0.000176143	0.00633999	19.1912	0	8.36972	7.64161	103.679	85.3027	58.3357	29.834	52.6045	65.9708	44.0706	27.5212
ENSMUSG00000020311	Erlec1	1846.13	-1.91588	0.25014	-3.74993	0.000176881	0.00634548	1138.34	1096.96	938.339	906.295	1774.47	1980.55	2028.1	2033.37	4175.13	1757.58	2316.27	2008.1
ENSMUSG00000089911	Mfsd14a	2982.54	1.40017	0.1296	3.74691	0.000179025	0.00640116	3538.25	3370.99	3508.77	3148.34	2255.24	2689.22	2136.08	2606.74	3164.57	3056.32	3361.66	2954.26
ENSMUSG00000040502	Marchf9	146.049	-3.3032	0.46062	-3.74249	0.000182207	0.00643265	94.9458	48.21	36.2688	52.7271	179.832	158.576	282.99	144.508	303.168	88.6175	131.187	231.558
ENSMUSG00000062980	Cped1	224.538	-4.85355	0.608671	-3.74429	0.000180907	0.00643265	162.62	33.3761	39.0587	8.40577	183.502	278.874	278.026	436.322	351.619	206.774	401.76	314.122
ENSMUSG00000026390	Marco	1598.18	2.84778	0.40328	3.74389	0.000181193	0.00643265	3875.61	5482.59	1516.78	1594.8	932.192	972.232	969.366	1504.75	409.761	1021.07	414.059	484.943
ENSMUSG00000044068	Zrsr1	801.449	-1.71641	0.208262	-3.74239	0.00018228	0.00643265	503.011	448.724	547.752	463.846	632.165	714.137	1129.48	895.02	957.955	1135.29	1085.37	1104.65
ENSMUSG00000027199	Gatm	2381.81	1.68965	0.203098	3.7259	0.000194622	0.0068459	2973.62	3852.35	2984.27	2968	1790.06	2338.17	1649.54	1785.38	1579.52	2744.19	1974.98	1941.67
ENSMUSG00000022136	Dnajc3	11187.6	-1.84396	0.237159	-3.72244	0.000197305	0.00691781	6982.56	6107.09	5503.56	5635.69	9521.02	10954.8	13216.1	10985.4	23525.3	9487	17436.6	14896.6
ENSMUSG00000101942	Gm19582	44.4611	-5.52469	0.663897	-3.71427	0.000203791	0.00712216	13.1308	17.8006	15.8095	2.29248	33.0304	61.243	129.083	47.5479	62.2948	35.447	52.2698	63.5836
ENSMUSG00000022769	Sdf2l1	10009.8	-1.82838	0.234688	-3.70947	0.000207697	0.00723535	7256.29	6270.26	6064.33	8046.62	9533.86	14245.6	16147.8	10606.9	14632.4	7277.47	9535.65	10500.8
ENSMUSG00000054408	Spcs3	7415.41	-1.69538	0.205371	-3.70847	0.000208519	0.0072407	4371.55	4976.01	4338.31	4126.47	6132.65	6842.81	8293.6	8930.62	11592.4	6867.86	12795.8	9716.9
ENSMUSG00000024334	H2-Oa	4290.92	1.79852	0.228456	3.70668	0.000209993	0.00724741	6639.14	4866.24	5991.79	7260.3	3039.72	5043.8	2823.7	2858.47	3423.44	3904.1	2543.8	3096.61
ENSMUSG00000026192	Atic	2450.11	1.46632	0.148977	3.70661	0.000210051	0.00724741	3140.28	3129.2	2845.71	3048.24	2069.91	2036.33	2095.12	2093.97	1809.32	2043.13	2430.03	2660.07
ENSMUSG00000024610	Cd74	9495.49	1.56809	0.175189	3.70464	0.000211691	0.00725779	13315.6	13038.2	9022.56	12816.5	8916.38	8117.97	7267.14	6432.02	8992.6	9609.1	9060.1	7357.66
ENSMUSG00000072884	Gm10433	31.4758	-18.2858	1.13165	-3.7049	0.00021147	0.00725779	0	0	11.1596	0	36.7005	41.5577	105.501	16.7816	33.2239	47.2627	39.971	45.5524
ENSMUSG00000073421	H2-Ab1	237887	1.69063	0.204883	3.69755	0.000217693	0.00744002	365675	293386	291966	394616	197653	269795	173581	154911	181397	217819	146688	167158
ENSMUSG00000008193	Spib	1312.31	1.95196	0.261323	3.69245	0.000222108	0.00756703	2681.71	1287.58	1693.47	1571.12	1269.84	768.818	683.893	980.792	1245.9	1010.24	1276	1278.31
ENSMUSG00000073079	Srp54a	224.452	-2.00156	0.271216	-3.69126	0.00022315	0.0075787	105.046	149.08	130.196	140.606	213.78	269.032	269.337	300.204	335.008	192.989	330.017	258.13
ENSMUSG00000020142	Slc1a4	204.526	-3.07929	0.439681	-3.6904	0.000223905	0.00758057	85.8553	51.1767	56.7281	132.964	252.316	95.1453	352.497	306.731	191.037	370.224	291.071	268.569
ENSMUSG00000060586	H2-Eb1	206987	1.70268	0.208685	3.67928	0.000233896	0.00789418	325440	255094	242786	355619	170569	233100	151217	137516	151696	186575	123959	150275
ENSMUSG00000037493	Cib2	357.258	-2.53535	0.365001	-3.6772	0.000235805	0.00793028	167.67	165.397	166.464	173.465	321.129	453.854	584.598	347.752	910.888	291.453	375.113	329.306
NA	NA	8.18963	94.9373	1.78671	3.67653	0.00023643	0.00793028	24.2415	22.9924	17.6694	7.64161	0	0	0	0	0	18.7081	5.12449	1.89802
ENSMUSG00000022018	Rgcc	3375.1	-2.48823	0.358679	-3.66657	0.000245823	0.00821991	1196.92	863.329	2605.77	2312.35	2918.6	5006.61	5715.66	3723.65	6611.55	3478.73	2704.71	3363.29
ENSMUSG00000031871	Cdh5	85.0743	-3.50915	0.494132	-3.66525	0.000247094	0.00823696	20.2012	27.4426	38.1287	52.7271	86.2461	146.546	80.6771	173.41	42.9142	117.172	103.515	131.912
ENSMUSG00000028756	Pink1	4605.63	-1.66525	0.201259	-3.65568	0.000256503	0.00852438	3746.32	2618.91	2889.41	3748.97	5153.66	5860.73	5559.27	5080.17	6845.5	5478.53	4156.99	4129.14
ENSMUSG00000026360	Rgs2	16132.9	1.67195	0.202939	3.65398	0.000258204	0.00855469	22782	17630	22652.2	26074.7	11143.2	16529	12881	12761.5	12949	16896.4	9984.55	11311.2
ENSMUSG00000040197	Cd209e	52.2247	9.51338	0.891966	3.64359	0.000268861	0.00888062	192.922	32.6344	128.336	103.926	20.1853	16.4044	0	11.1877	30.4552	33.4777	3.07469	54.0935
ENSMUSG00000045573	Penk	8.06196	-94.7295	1.80363	-3.6403	0.000272322	0.00896758	0	0	0	0	27.5253	0	19.859	12.1201	13.8433	10.831	3.07469	9.49008
ENSMUSG00000056054	S100a8	3227.63	-4.62184	0.607005	-3.6383	0.000274441	0.00898277	1816.09	1200.06	1432.15	1215.02	9806.36	11041.2	3112.89	2213.31	2952.77	2210.52	1207.33	523.853
ENSMUSG00000020715	Ern1	1642.07	-2.8631	0.417094	-3.63847	0.000274268	0.00898277	881.784	1016.86	381.287	226.956	2808.5	1276.26	1506.8	1584.93	3008.15	1432.65	3506.18	2074.53
ENSMUSG00000027398	Il1b	18054.7	1.92957	0.260754	3.63666	0.000276192	0.00901284	24967.7	17078.2	32853	34541.6	13449.8	16682.1	8587.76	17996.4	12518.5	15367.3	10939.8	11674.7
ENSMUSG00000025816	Sec61a2	13.5566	-146.905	1.98122	-3.63348	0.000279623	0.00909742	0	0	0	0	25.6903	0	54.6122	12.1201	8.30597	0	16.3984	45.5524
ENSMUSG00000032437	Stt3b	6729.13	-1.74409	0.220958	-3.63181	0.000281445	0.00912926	4839.21	4763.89	3471.57	2822.81	7512.58	5252.68	6688.75	8270.54	8441.64	7576.8	11244.2	9864.94
ENSMUSG00000041891	Lman1	1207.92	-2.30301	0.331758	-3.62769	0.000285965	0.00924819	447.458	618.571	631.449	420.289	965.222	739.29	1454.67	1718.25	1276.35	1143.17	2797.97	2282.37
ENSMUSG00000004891	Nes	16.1588	-101.644	1.83911	-3.62533	0.000288597	0.00930553	0	0	0.929969	0	26.6078	21.8725	26.0649	30.7663	69.2164	0	18.4482	0
ENSMUSG00000026721	Rabgap1l	1708.53	-1.94758	0.265506	-3.62208	0.000292239	0.009395	863.603	759.492	854.642	962.079	1306.54	1712.62	1717.8	1962.52	3214.41	1648.29	3728.58	1771.8
ENSMUSG00000023809	Rps6ka2	420.614	-2.25817	0.324524	-3.62115	0.000293292	0.00940096	135.348	218.799	280.851	152.832	596.382	270.125	408.35	503.448	724.004	503.151	774.823	479.249
ENSMUSG00000070471	Erich6	8.89625	-138.264	1.96468	-3.61956	0.000295104	0.00943115	0	0	0	0	23.8553	27.3406	19.859	15.8493	2.76866	0	0	17.0822
ENSMUSG00000044165	Bcl2l15	96.4378	-3.99114	0.551936	-3.61782	0.000297099	0.00946696	76.7647	9.64199	48.3584	33.6231	138.544	187.01	223.413	120.268	83.0597	46.2781	121.963	68.3286
ENSMUSG00000021218	Gdi2	22627.6	1.41025	0.137162	3.61581	0.000299406	0.00951249	33464.4	25810.1	23986.7	26965.7	19582.4	21273.2	18028.2	19275.6	21800.4	20579	19440.3	21325.2
ENSMUSG00000029638	Glcci1	111.247	-4.09769	0.564523	-3.60448	0.000312778	0.00990829	4.04025	40.793	33.4789	36.6797	137.627	87.49	90.6065	157.561	267.175	141.788	241.876	95.8498
ENSMUSG00000050967	Creg2	123.114	-7.27832	0.796018	-3.59741	0.000321401	0.0101518	18.1811	51.9184	25.1092	0	96.3387	155.295	328.914	113.742	189.653	51.2012	269.548	177.465
ENSMUSG00000028874	Fgr	2559.9	1.73917	0.221989	3.59659	0.000322411	0.0101541	4871.53	3901.3	2949.86	2914.51	2391.95	1878.85	1822.06	2321.46	2082.03	2325.72	1406.16	1853.41
ENSMUSG00000070044	Fam149a	1113.74	1.6464	0.200052	3.59566	0.000323569	0.010161	1286.82	1267.55	1248.95	1659.76	876.223	821.312	768.294	852.133	812.601	1112.64	1441.01	1217.58
ENSMUSG00000025815	Dhtkd1	26.2846	-92.0269	1.8165	-3.59152	0.000328756	0.0102056	0	0	0	0	11.9276	45.9322	0	0	15.2276	148.681	21.5229	72.1246
ENSMUSG00000031431	Tsc22d3	1257.85	-3.16002	0.462179	-3.59153	0.000328739	0.0102056	573.715	496.192	727.236	891.776	777.132	1041.13	5026.8	1653.92	717.082	670.539	1473.8	1044.86
ENSMUSG00000027611	Procr	1171.98	1.77237	0.229817	3.59277	0.000327182	0.0102056	1664.58	1688.09	1240.58	1743.82	1033.12	1019.26	719.888	802.721	700.47	1352.89	1039.25	1059.09
ENSMUSG00000090124	Ugt1a7c	346.369	2.60414	0.384444	3.59169	0.000328535	0.0102056	644.42	488.775	449.175	488.299	304.614	265.751	148.942	75.5173	228.414	277.668	423.283	361.572
ENSMUSG00000089682	Bcl2l2	698.413	-1.8052	0.237442	-3.58893	0.000332039	0.010278	538.363	379.746	376.638	375.967	590.877	769.912	816.7	837.216	1046.55	819.22	1167.36	662.408
ENSMUSG00000009350	Mpo	459.507	-10.0854	0.930468	-3.58335	0.000339212	0.0104108	88.8855	221.024	35.3388	14.5191	1885.49	1120.97	80.6771	542.606	350.235	502.166	542.171	130.014
ENSMUSG00000024521	Pmaip1	5646.49	1.61483	0.192932	3.58357	0.000338927	0.0104108	5933.11	5854.17	9066.27	9471.01	4148.99	4830.54	5287.45	4513.32	4907.44	4730.21	4944.11	4071.25
ENSMUSG00000097101	1810034E14Rik	177.207	-2.97199	0.438502	-3.58363	0.000338855	0.0104108	43.4327	63.0438	103.227	123.03	167.905	267.938	368.632	186.462	341.929	137.85	158.859	164.178
ENSMUSG00000018672	Copz2	348.375	-2.26833	0.329831	-3.58253	0.000340287	0.0104143	213.123	219.541	150.655	223.135	263.326	370.739	704.993	492.261	538.504	323.946	382.287	297.989
ENSMUSG00000034858	Fam214a	77.3057	-7.54328	0.814903	-3.57735	0.000347098	0.010561	1.01006	7.41692	32.5489	23.689	178.915	52.494	186.178	70.8557	207.649	95.51	28.6971	42.7054
ENSMUSG00000062014	Gmfb	2907.37	1.40776	0.13795	3.57667	0.000348005	0.010561	3286.74	3602.4	3036.35	2950.43	2392.87	2258.33	1959.83	2533.09	3038.6	3259.16	3482.6	3088.07
ENSMUSG00000031782	Coq9	1162.9	-1.54655	0.175827	-3.57771	0.000346622	0.010561	949.458	717.958	959.728	917.758	1177.17	1511.39	1546.52	1247.43	1342.8	1221.94	1046.42	1316.27
ENSMUSG00000017002	Slpi	17139.9	-2.28756	0.333995	-3.57433	0.000351124	0.0106259	18136.7	11383.5	5959.24	7111.28	19689.8	25793.1	31537.3	20407.4	23270.6	19441.7	10520.6	12428.2
ENSMUSG00000009566	Fpgs	593.113	-2.00408	0.280898	-3.57047	0.000356341	0.0107538	282.817	299.643	397.097	471.487	835.853	732.728	794.359	546.335	1003.64	465.734	703.08	584.589
ENSMUSG00000033313	Fbxl8	132.613	-2.19058	0.317395	-3.56438	0.00036472	0.0109456	85.8553	86.0362	60.448	90.171	178.915	204.508	157.631	165.952	186.884	151.634	132.212	91.1048
ENSMUSG00000042759	Apobr	3896.9	1.67307	0.208281	3.56487	0.000364035	0.0109456	6439.15	5650.21	4354.12	4509.32	4063.66	3334.46	2702.06	2422.15	2797.73	3571.29	3824.92	3093.77
ENSMUSG00000059182	Skap2	8055.95	1.52549	0.171181	3.55925	0.000371911	0.0111	10283.4	10029.9	8767.75	12193.7	7010.7	7941.9	6379.69	5725.33	7213.74	8509.25	6022.3	6593.71
ENSMUSG00000047462	Gpr141b	3134.29	1.89602	0.259269	3.5599	0.000370992	0.0111	2765.55	3653.57	4544.76	5171.84	1602.89	2378.63	2224.2	2305.61	2447.49	3024.81	4852.89	2639.19
ENSMUSG00000037349	Nudt22	469.839	-2.28289	0.334942	-3.55542	0.000377378	0.0112322	227.264	178.006	336.649	345.401	517.476	860.683	762.088	343.091	476.209	706.971	483.752	400.482
ENSMUSG00000042377	Fam83g	135.616	-4.57533	0.618143	-3.54914	0.000386496	0.011472	81.815	28.1843	27.8991	5.34913	291.769	150.92	74.4711	134.253	285.172	195.943	147.585	204.037
ENSMUSG00000004665	Cnn2	16038.7	1.48788	0.162033	3.53789	0.000403334	0.011923	24498	17432.7	19209.4	24408.8	13217.7	16845.1	13871.5	13563.3	11442.9	13123.3	11254.4	13597.4
ENSMUSG00000074695	Il22	117.113	2.89681	0.433767	3.53753	0.000403888	0.011923	212.113	89.003	172.044	212.437	44.0405	91.8645	40.9591	59.668	112.131	93.5407	185.506	92.0538
ENSMUSG00000095041	AC149090.1	4228.64	-2.0932	0.301418	-3.53566	0.000406764	0.0119752	1339.34	3147.74	3315.34	3338.62	7437.35	3439.45	5539.41	6905.64	5045.88	3081.92	4281	3871.95
ENSMUSG00000026211	Obsl1	10.9112	-147.057	2.04193	-3.52619	0.000421589	0.012378	0	0	0	0	40.3705	49.2131	0	2.79694	0	21.6621	10.249	6.64306
ENSMUSG00000055725	Paqr3	35.8692	-6.07682	0.738457	-3.52534	0.000422932	0.0123839	14.1409	5.93353	3.71988	9.16993	65.1433	31.7151	79.4359	23.3078	85.8284	41.3549	57.3943	13.2861
ENSMUSG00000031584	Gsr	2312.9	1.43039	0.14662	3.52207	0.000428191	0.0124527	3135.23	2983.83	2709	3008.5	2346.08	2088.82	1747.59	2090.24	1691.65	2098.27	1791.52	2064.09
ENSMUSG00000023277	Twf2	2457.61	1.52353	0.17251	3.52107	0.000429805	0.0124527	3518.05	2537.33	3209.32	3879.65	2010.27	2507.68	2007	2102.36	1676.42	2134.7	1865.31	2043.22
ENSMUSG00000027596	a	32.9727	-8.50711	0.877207	-3.52103	0.000429879	0.0124527	9.09056	5.19184	0	12.9907	18.3502	59.0557	105.501	50.3448	23.5336	43.3241	12.2988	55.9915
ENSMUSG00000052160	Pld4	9185.72	1.37208	0.129578	3.52195	0.000428382	0.0124527	13355	11261.1	9966.48	11682.5	9271.45	8479.96	8395.38	7571.31	7647.03	7601.42	7442.81	7554.11
ENSMUSG00000071650	Ganab	10.3016	62.7385	1.69691	3.51892	0.000433309	0.0125186	15.1509	9.64199	23.2492	0	0	0	0	0	26.3022	14.7696	17.4233	17.0822
ENSMUSG00000021423	Ly86	4736.53	1.86364	0.255636	3.51328	0.000442605	0.0127193	9318.83	6717.5	5733.26	7145.67	3642.52	4097.81	4263.47	3512.02	3550.8	4592.36	1963.7	2300.4
ENSMUSG00000052616	Terb1	12.1032	-136.819	2.01958	-3.51365	0.000441988	0.0127193	0	0	0	0	12.8452	45.9322	27.3061	0	27.6866	0	27.6722	3.79603
ENSMUSG00000101585	1600010M07Rik	629.748	2.23156	0.330257	3.50652	0.000454007	0.0130125	1004	628.213	1112.24	1425.16	427.56	504.161	352.497	583.627	373.769	596.691	212.154	336.898
ENSMUSG00000044811	Cd300c2	2069.46	1.74135	0.228744	3.49828	0.000468277	0.0133861	4435.18	2829.55	2257.97	3123.13	1759.79	1886.5	1736.42	1878.61	1306.81	1478.93	854.765	1285.91
ENSMUSG00000022225	Cma1	57.5891	5.07423	0.670984	3.49217	0.000479121	0.0136241	133.328	84.5529	132.056	84.0577	5.50507	26.247	8.6883	44.751	13.8433	59.0784	42.0208	56.9405
ENSMUSG00000113591	4930447K03Rik	11.8383	152.243	2.076	3.4924	0.000478694	0.0136241	1.01006	80.8444	16.7394	17.5757	0	0	0	0	20.7649	0	5.12449	0
ENSMUSG00000021957	Tkt	10292.9	1.40477	0.140577	3.48805	0.000486554	0.0137964	13019.7	11905.6	13387.8	13075.6	10081.6	10415.7	8498.4	7585.29	8650.67	9178.81	8092.59	9622.94
ENSMUSG00000025964	Adam23	4075.34	1.78655	0.240056	3.48741	0.000487725	0.0137964	5550.29	5599.77	4343.89	4859.3	3768.22	2832.49	1697.94	3091.55	3024.76	4638.64	4916.43	4580.86
ENSMUSG00000096847	Tmem151b	61.5933	-3.46363	0.514227	-3.48539	0.000491411	0.0138645	16.161	15.5755	52.0783	14.5191	93.5862	86.3963	93.0889	66.1942	65.0634	94.5254	58.4192	83.5127
ENSMUSG00000026675	Hsd17b7	206.122	2.49992	0.380086	3.47785	0.000505448	0.0142234	243.425	304.835	210.173	251.409	116.524	124.673	68.2652	94.1635	102.44	345.608	305.42	306.53
ENSMUSG00000074676	Foxs1	13.2387	113.817	1.96534	3.47552	0.000509857	0.0143103	31.3119	0	25.1092	30.5664	0	0	0	0	42.9142	0	19.4731	9.49008
ENSMUSG00000025381	Cnpy2	3582.42	-2.02675	0.293571	-3.47163	0.000517308	0.014482	2807.97	1895.02	2039.42	2240.52	3577.38	5102.85	5865.84	3660.26	6838.58	3403.9	2586.84	2970.4
ENSMUSG00000019804	Snx3	5663.99	1.3618	0.128545	3.46581	0.000528641	0.0147611	7409.82	6466.07	6632.54	7718.03	4690.32	5881.51	5242.77	4914.22	4777.32	5014.77	4420.38	4800.08
ENSMUSG00000028673	Fuca1	8961.99	1.50415	0.170123	3.46189	0.000536394	0.0149391	12712.6	9649.41	10841.6	13678.5	6598.74	9386.58	7779.75	7404.42	7948.81	8207.95	6549.1	6786.36
ENSMUSG00000020474	Polm	482.213	-1.86992	0.261026	-3.45933	0.000541523	0.0150432	232.314	275.168	385.007	385.901	715.659	378.394	655.346	641.431	535.735	495.274	598.54	487.79
ENSMUSG00000025935	Tram1	6072.01	-1.50424	0.170459	-3.45556	0.000549146	0.015216	4007.93	4646.7	4363.42	4234.98	5295.88	5991.97	7134.33	7532.15	8271.36	5802.48	8398.01	7184.94
ENSMUSG00000096263	Snord14c	12.0488	113.244	1.97534	3.45425	0.000551834	0.0152515	0	28.926	9.29969	48.1422	0	0	0	0	13.8433	0	22.5477	21.8272
ENSMUSG00000003379	Cd79a	6943.64	-1.9187	0.272277	-3.45285	0.000554695	0.0152915	7247.2	2784.31	3258.61	4729.39	7590.57	8721.66	10326.7	7933.04	9625.24	6358.8	6493.75	8254.47
ENSMUSG00000044309	Apol7c	6097.93	2.0215	0.294301	3.4503	0.000559971	0.0153978	7787.58	8665.93	9375.02	11801.7	2480.95	4067.19	5720.62	6347.18	3074.59	3842.06	3592.27	6420.04
ENSMUSG00000031790	Mmp15	101.972	-7.15442	0.823804	-3.44601	0.000568936	0.0156047	9.09056	50.435	10.2297	0	130.287	51.4004	172.525	147.305	287.94	82.7097	165.009	116.728
ENSMUSG00000053931	Cnn3	483.138	2.20719	0.331875	3.44169	0.000578094	0.0158158	1107.03	539.21	562.631	719.076	333.974	337.93	181.213	471.75	341.929	482.473	283.897	436.544
ENSMUSG00000049350	Zg16	12.9381	116.501	1.99564	3.43959	0.00058259	0.0158987	34.3421	0	6.50978	48.1422	0	0	0	0	0	38.4009	17.4233	10.4391
ENSMUSG00000020844	Nxn	452.855	-1.66683	0.214978	-3.42874	0.000606384	0.0164651	343.421	275.909	356.178	301.844	546.837	506.348	631.763	443.781	567.575	393.856	590.341	476.402
ENSMUSG00000005413	Hmox1	36953.8	2.21029	0.333705	3.42889	0.000606062	0.0164651	95653.9	72335	36459.4	43262.2	26619.8	24363.8	27668.5	33418.7	20482.5	34240.8	10565.7	18374.7
ENSMUSG00000092260	Zfp963	309.732	-2.24337	0.340655	-3.42184	0.000621989	0.0168466	202.012	120.896	188.784	166.587	270.666	278.874	481.58	489.464	210.418	345.608	481.702	480.198
ENSMUSG00000027742	Cog6	1247.22	-1.57237	0.190913	-3.42007	0.000626046	0.0169142	880.774	918.214	930.899	794.728	1084.5	1254.39	1643.33	1560.69	1284.66	1258.37	1659.31	1696.83
ENSMUSG00000049988	Lrrc25	1667.95	1.81551	0.251712	3.41809	0.000630614	0.0169952	2976.65	2801.37	1826.46	2085.4	1491.87	1418.43	1091	1335.07	1083.93	1894.45	945.981	1064.79
ENSMUSG00000078317	F8a	379.476	-1.84523	0.25886	-3.41421	0.000639678	0.017137	199.992	198.773	274.341	329.353	491.786	531.502	448.068	379.451	472.056	317.054	516.548	394.787
ENSMUSG00000017969	Ptgis	1208.24	1.88845	0.268674	3.41381	0.000640621	0.017137	2464.55	1920.24	1532.59	1698.73	900.079	1111.12	716.164	1304.3	710.161	969.87	447.88	723.144
ENSMUSG00000015839	Nfe2l2	180.145	2.02334	0.297787	3.41433	0.000639402	0.017137	208.073	221.024	242.722	262.107	141.297	114.831	126.601	79.2465	236.72	227.452	139.386	162.28
ENSMUSG00000037443	Cep85	726.488	-2.50514	0.388451	-3.4107	0.000647961	0.0172907	96.966	396.805	479.864	482.186	769.792	690.077	1179.13	1010.63	858.284	677.432	1157.11	919.589
ENSMUSG00000001542	Ell2	5380.41	-2.06719	0.307307	-3.40921	0.000651511	0.0173427	3876.62	3677.31	1494.46	1442.74	5565.62	4796.64	5469.9	5853.99	9129.65	5826.11	9644.29	7787.56
ENSMUSG00000059316	Slc27a4	894.113	-1.63568	0.208439	-3.40576	0.000659792	0.0174772	742.396	646.755	660.278	565.479	1326.72	910.989	1169.2	868.915	1161.45	762.111	999.275	915.793
ENSMUSG00000027799	Nbea	59.3487	-10.7103	1.00442	-3.40587	0.000659539	0.0174772	0	17.8006	0	12.9907	77.071	14.2171	134.048	109.081	41.5299	38.4009	158.859	108.187
ENSMUSG00000050350	Gpr18	2150.96	-1.72451	0.231368	-3.39798	0.000678845	0.0179381	1988.81	1108.83	1447.03	1800.36	2004.76	2799.68	3673.91	2464.1	2447.49	1891.49	2101.04	2084.02
ENSMUSG00000037722	Gnpnat1	551.895	-1.66047	0.215347	-3.39729	0.000680571	0.0179399	328.27	482.1	427.786	489.063	628.495	756.788	692.582	792.465	595.261	508.074	543.196	378.654
ENSMUSG00000003380	Rabac1	9188.95	-2.07001	0.309293	-3.39365	0.000689669	0.0181356	7214.87	3954.7	5265.49	5475.98	8024.55	12482.6	14165.7	10682.4	19208.9	8364.51	6608.54	8819.13
ENSMUSG00000058013	Septin11	1592.71	-2.0084	0.296842	-3.38916	0.000701062	0.0183906	813.1	922.665	718.866	573.885	2178.17	1010.51	1089.76	1802.16	2263.38	1617.76	3527.7	2594.59
ENSMUSG00000024780	Cdc37l1	12.3581	-118.667	2.03602	-3.38444	0.000713232	0.0186646	0	0	0	0	47.7106	0	2.48237	24.2401	29.0709	0	15.3735	29.4193
ENSMUSG00000026409	Pfkfb2	217.178	-2.23483	0.343032	-3.3821	0.000719334	0.0187671	119.187	126.829	115.316	103.162	281.676	181.542	172.525	400.894	200.728	242.221	392.536	269.518
ENSMUSG00000026368	F13b	31.0941	-13.6262	1.11453	-3.38108	0.000722003	0.0187671	0	0	0	13.7549	59.6382	47.0259	55.8533	28.9017	70.6008	37.4163	27.6722	32.2663
ENSMUSG00000048965	Mrgpre	93.6371	-5.01563	0.688099	-3.38095	0.000722345	0.0187671	40.4025	25.2175	13.0196	9.9341	166.07	67.8047	50.8886	157.561	214.571	102.402	251.1	24.6742
ENSMUSG00000050304	Slc25a2	10.2986	63.3519	1.7709	3.37981	0.000725369	0.0188006	26.2616	0	4.64985	17.5757	0	0	0	0	29.0709	24.616	7.17428	14.2351
ENSMUSG00000004451	Ralb	1587.98	1.49526	0.171996	3.37444	0.000739647	0.0191249	2384.76	1808.24	1728.81	2439.2	1313.88	1423.9	1532.86	1322.02	1247.28	1163.84	1480.98	1209.99
ENSMUSG00000032757	Bet1	1580.27	-1.74639	0.239425	-3.3596	0.000780549	0.0201344	1108.04	1004.99	1315.91	1225.71	1212.95	2246.3	2411.62	2258.99	2037.73	1269.2	1436.91	1434.9
ENSMUSG00000084989	Crocc2	60.6589	-3.8235	0.5762	-3.35802	0.000785015	0.0202016	41.4125	33.3761	16.7394	12.9907	61.4733	41.5577	124.119	171.545	51.2202	65.9708	42.0208	65.4816
ENSMUSG00000001424	Snd1	8419.31	-1.57453	0.195261	-3.35408	0.000796296	0.0204433	6616.92	6115.99	4939.07	4963.23	9794.43	7900.34	9023.42	8920.36	12209.8	7196.73	12652.4	10699.1
ENSMUSG00000025477	Inpp5a	9.88836	-112.66	2.0326	-3.35326	0.000798667	0.0204557	0	0	0	0	11.0101	0	45.9239	13.9847	13.8433	0	9.22408	24.6742
ENSMUSG00000036693	Nop14	1236.03	1.49888	0.174168	3.35245	0.000801004	0.0204672	1830.23	1297.22	1299.17	1211.96	1029.45	952.547	907.307	870.779	1272.2	1263.29	1448.18	1450.08
ENSMUSG00000021796	Bmpr1a	166.434	-5.85014	0.760465	-3.3512	0.000804617	0.0205111	0	9.64199	81.8373	19.104	137.627	106.082	173.766	228.416	445.754	244.191	338.216	212.578
ENSMUSG00000068735	Trp53i11	8.01978	-104.635	2.00266	-3.35015	0.000807668	0.0205406	0	0	0	0	0.917511	17.498	37.2356	10.2554	20.7649	0	1.0249	8.54108
ENSMUSG00000032038	St3gal4	1794.42	1.65989	0.218367	3.34797	0.000814062	0.0206547	1762.56	1943.23	3046.58	2951.19	1140.47	1649.19	1606.09	1451.61	1420.32	1606.93	1622.41	1332.41
ENSMUSG00000008859	Rala	4557.19	1.44585	0.158981	3.3458	0.000820469	0.0207686	5735.13	5013.84	4990.21	6807.15	3571.87	4645.72	3845.19	3532.53	4064.39	4548.05	3773.67	4158.55
ENSMUSG00000097471	5830432E09Rik	179.837	-2.62037	0.415507	-3.34476	0.000823546	0.0207979	102.016	62.3021	85.5572	124.558	247.728	217.631	285.473	230.281	335.008	73.848	189.606	204.037
ENSMUSG00000021271	Zfp839	13.5105	65.9942	1.80883	3.34153	0.000833184	0.0209924	0	10.3837	31.619	8.40577	0	0	0	0	53.9888	19.6928	1.0249	37.0113
ENSMUSG00000067424	Zfp563	116.821	-3.39841	0.528652	-3.33841	0.000842585	0.0210821	22.2214	66.0106	47.4284	57.3121	114.689	96.239	191.143	255.453	76.1381	63.0169	196.78	215.425
ENSMUSG00000025492	Ifitm3	4090.84	1.76457	0.245365	3.33917	0.000840305	0.0210821	7449.21	5192.58	5202.25	6710.1	3674.63	4302.32	2970.16	2967.55	2878.02	3818.43	1802.8	2121.98
ENSMUSG00000021065	Fut8	34.186	-8.98987	0.948917	-3.33886	0.00084123	0.0210821	0	0	12.0896	9.16993	34.8654	59.0557	34.7532	62.4649	42.9142	29.5392	91.2159	34.1643
ENSMUSG00000029163	Emilin1	245.026	-2.69332	0.428599	-3.33502	0.000852934	0.0211942	75.7547	109.77	104.157	180.342	300.944	192.478	306.573	467.088	215.955	148.681	520.648	317.918
ENSMUSG00000040616	Tmem51	1284.68	1.58638	0.199578	3.33572	0.000850787	0.0211942	2118.1	1706.63	1455.4	1928.74	1279.93	1259.86	839.041	1163.53	928.884	1072.27	771.748	892.068
ENSMUSG00000052435	Cebpe	32.0621	-21.9008	1.33508	-3.33533	0.000851996	0.0211942	0	6.67523	8.36972	0	125.699	153.107	0	51.2772	12.459	8.86175	16.3984	1.89802
ENSMUSG00000032420	Nt5e	655.345	-1.63273	0.212248	-3.33236	0.000861115	0.0212513	291.908	503.609	472.424	393.543	734.009	624.46	582.116	772.887	809.832	939.346	813.769	926.232
ENSMUSG00000044562	Rasip1	410.601	-1.89508	0.276732	-3.3327	0.000860084	0.0212513	314.129	277.393	165.535	312.542	645.011	429.794	573.428	379.451	495.59	365.301	526.797	442.238
ENSMUSG00000058709	Egln2	517.279	-1.92161	0.282752	-3.33265	0.000860245	0.0212513	519.172	390.872	307.82	349.986	522.981	786.316	1151.82	552.861	431.91	369.24	431.482	392.889
ENSMUSG00000036362	P2ry13	784.279	2.4636	0.39099	3.32685	0.000878335	0.021627	2284.76	1495.25	872.311	778.68	565.187	411.203	511.368	716.016	571.728	662.662	209.079	333.102
ENSMUSG00000035958	Tdp2	764.43	-1.63235	0.212712	-3.32353	0.000888866	0.0218367	461.598	494.708	787.684	599.867	930.357	1114.4	769.535	1010.63	779.377	732.572	700.005	792.422
ENSMUSG00000097820	E530011L22Rik	12.1696	-58.6576	1.76798	-3.32258	0.000891906	0.0218618	1.01006	0	0.929969	0	38.5355	0	44.6827	21.4432	8.30597	15.7542	15.3735	0
ENSMUSG00000039234	Sec24d	2150.78	-2.19166	0.341609	-3.31381	0.00092035	0.0225081	1139.35	1143.69	785.824	702.264	1859.8	1546.39	2421.55	2437.06	2429.5	1460.22	5213.65	4670.07
ENSMUSG00000044468	Tent5c	7967.23	-1.67383	0.224926	-3.30399	0.0009532	0.0230875	6204.81	4909.26	3669.66	3670.27	8304.4	6918.27	7989.51	7674.79	13317.2	7721.54	14118	11109.1
ENSMUSG00000022965	Ifngr2	2496.7	1.56421	0.195468	3.302	0.000959991	0.0230875	4151.36	3493.37	2771.31	2842.68	2434.16	2235.37	1689.25	2115.42	2084.8	2017.53	1676.73	2448.44
ENSMUSG00000030341	Tnfrsf1a	4250.24	1.55352	0.192404	3.30314	0.000956103	0.0230875	5781.6	5712.51	5023.69	5258.96	4596.73	3750.04	2586.63	3082.22	3087.05	4165.02	3833.12	4125.34
ENSMUSG00000022901	Cd86	8642.8	1.77247	0.250057	3.30228	0.00095903	0.0230875	15969.1	15038.5	7278.87	9596.34	7819.95	7316.35	5371.85	6505.67	6759.68	9230.99	6594.19	6232.14
ENSMUSG00000027195	Hsd17b12	2615.49	1.62468	0.212062	3.30168	0.000961091	0.0230875	4235.19	4200.94	2893.13	2989.4	2176.34	2204.75	2327.22	2105.16	1681.96	2894.84	1890.94	1786.03
ENSMUSG00000043931	Gimap7	1090.34	-2.07648	0.319254	-3.3019	0.000960338	0.0230875	836.331	491.742	912.3	940.682	915.676	1148.31	2640	1901.92	715.698	803.466	1005.42	772.493
ENSMUSG00000041488	Stx3	185.33	2.09663	0.323386	3.30277	0.000957334	0.0230875	197.972	244.017	239.002	233.069	84.411	139.984	127.842	84.8404	240.873	195.943	300.295	135.708
ENSMUSG00000054404	Slfn5	1420.55	2.03431	0.310127	3.30362	0.000954449	0.0230875	2092.85	2644.13	1298.24	1472.54	1089.09	737.103	919.718	944.432	974.567	1205.2	2484.35	1184.36
ENSMUSG00000025993	Slc40a1	13491.5	2.20602	0.345916	3.29979	0.000967585	0.0231921	35617.8	28482.4	12606.7	12707.2	10909.2	7470.55	8279.95	13870.9	6929.95	12467.5	6228.3	6327.04
ENSMUSG00000018583	G3bp1	7486.1	1.48582	0.173277	3.2968	0.000977916	0.023388	11734.9	10159	7924.27	8304.14	7119.89	6912.8	5370.61	6252.08	5527.62	6740.84	6547.05	7239.98
ENSMUSG00000013367	Iglon5	89.479	-6.33596	0.809445	-3.2906	0.000999724	0.0238568	45.4528	21.5091	0	4.58497	43.123	92.9581	177.49	137.982	96.903	124.065	158.859	170.822
ENSMUSG00000025279	Dnase1l3	19362.3	1.67607	0.22657	3.28852	0.00100715	0.0239812	25902	31756.3	15185.5	26518.7	18205.3	13512.8	12598	14966.4	15411.7	17040.2	22860.3	18390.8
ENSMUSG00000087110	Gm11264	6.43359	70.6981	1.86902	3.28707	0.00101237	0.0240526	17.1711	19.284	8.36972	9.16993	0	0	0	0	0	9.84639	1.0249	12.3371
ENSMUSG00000034066	Farp2	481.905	-1.86767	0.274285	-3.28579	0.00101698	0.0241094	223.224	195.807	331.999	242.239	492.704	390.424	441.862	528.621	674.168	460.811	983.902	817.096
ENSMUSG00000022797	Tfrc	10.52	40.1149	1.62221	3.28322	0.00102629	0.0242575	20.2012	2.22508	21.3893	6.87745	0	0	1.24119	0	30.4552	29.5392	1.0249	13.2861
ENSMUSG00000020098	Pcbd1	61.1805	-7.63855	0.893528	-3.28283	0.00102771	0.0242575	18.1811	0	5.57981	21.3965	94.5037	38.2769	183.695	27.9694	179.963	45.2934	60.469	58.8385
ENSMUSG00000047880	Cxcr5	1801.44	1.90593	0.283537	3.28175	0.00103164	0.0242973	4011.97	1490.8	1783.68	1982.23	1193.68	1088.16	1222.57	1357.45	1796.86	1945.65	1441.01	2303.24
ENSMUSG00000031668	Eif2ak3	2721.54	-1.85321	0.27162	-3.27674	0.00105013	0.0246259	1539.33	1849.04	978.328	1101.16	3709.5	1943.37	2251.51	2228.23	5668.83	3134.11	4185.68	4069.35
ENSMUSG00000038150	Ormdl3	1877.67	-1.61393	0.210719	-3.27726	0.00104821	0.0246259	1488.83	1073.97	1547.47	1232.59	1731.34	2611.58	2615.18	1665.11	2453.03	2133.71	1858.14	2121.03
NA	NA	7.30356	-100.293	2.02983	-3.27519	0.00105593	0.0247083	0	0	0	0	8.2576	28.4342	16.1354	10.2554	0	0	11.2739	13.2861
ENSMUSG00000001128	Cfp	10865.7	2.04228	0.31488	3.27167	0.00106916	0.0249639	27458.5	17292.5	11535.3	12905.9	9864.17	7467.27	6955.6	9591.63	6981.17	11008.3	4090.37	5237.58
ENSMUSG00000031246	Sh3bgrl	6917.15	1.43076	0.158099	3.26875	0.00108024	0.0251683	9150.15	8217.94	7678.76	7766.93	5159.17	5808.24	5680.91	6285.65	8220.14	7343.44	6227.28	5467.24
ENSMUSG00000055723	Rras2	1488.81	1.62195	0.213576	3.2669	0.00108732	0.0252791	2394.86	1794.15	1764.15	2135.07	1083.58	1329.85	1194.02	1378.89	1082.54	1413.94	819.918	1474.76
ENSMUSG00000026170	Cyp27a1	3009.95	1.61206	0.211021	3.26461	0.00109616	0.0254299	2771.61	3560.12	4125.34	5904.67	2644.27	2537.21	2293.71	2674.8	2228.77	2540.37	2427.98	2410.48
ENSMUSG00000026866	Kynu	241.894	1.93129	0.290939	3.2638	0.00109931	0.0254484	358.572	367.137	374.778	334.703	177.997	123.58	207.278	234.01	117.668	165.419	209.079	232.507
ENSMUSG00000047193	Dync2h1	107.429	-3.54897	0.560694	-3.25918	0.00111735	0.0258111	18.1811	52.6601	35.3388	17.5757	139.462	76.5537	94.3301	129.591	242.257	75.8172	323.868	83.5127
ENSMUSG00000029390	Tmed2	3328.72	-1.41936	0.15512	-3.25713	0.00112544	0.0259425	2904.94	2398.63	2500.69	2736.46	3280.1	4204.99	3912.22	3564.23	3712.77	2906.66	3798.27	4024.74
ENSMUSG00000027514	Zbp1	164.226	-2.51577	0.409014	-3.25416	0.00113726	0.0261595	81.815	91.2281	68.8177	58.8404	150.472	220.912	278.026	108.148	377.922	135.88	206.004	192.649
ENSMUSG00000017707	Serinc3	54018.4	-1.65426	0.224157	-3.23962	0.0011969	0.0274728	43342.8	32249.5	33732.8	34992.5	41472.4	53373.3	74045.4	69847	88822.7	49733.2	62252.3	64357
ENSMUSG00000038607	Gng10	4976.29	1.63722	0.219668	3.23781	0.00120449	0.0275888	7361.33	5371.33	6622.31	7786.8	3732.44	4948.65	4493.09	3404.8	4915.75	4935.01	2961.95	3182.03
ENSMUSG00000038894	Irs2	3927.68	-2.02578	0.314972	-3.23355	0.00122263	0.027945	1121.17	2591.47	2470.93	1263.16	5715.18	2450.81	3205.98	3713.4	7104.37	4546.08	7247.05	5702.59
ENSMUSG00000042460	C1galt1	546.754	-1.93274	0.294113	-3.23226	0.00122814	0.0280118	253.526	315.961	310.61	216.258	654.186	514.004	577.151	373.857	830.597	550.413	1282.15	682.337
ENSMUSG00000037306	Man1c1	729.09	-1.72167	0.242676	-3.22986	0.0012385	0.0281888	526.242	438.34	415.696	476.072	904.666	768.818	907.307	615.326	1176.68	639.031	1127.39	753.513
ENSMUSG00000087362	Gm13710	233.489	2.38658	0.388686	3.22869	0.00124359	0.0282455	685.832	347.853	300.38	259.051	183.502	153.107	166.319	164.087	157.813	209.728	84.0416	90.1558
ENSMUSG00000037708	Spag6	129.459	-6.50654	0.837415	-3.22647	0.00125328	0.028406	44.4427	33.3761	5.57981	0	133.957	179.354	163.836	64.3295	517.739	88.6175	148.61	173.669
ENSMUSG00000055692	Tmem191c	280.176	-2.2306	0.358982	-3.22421	0.00126322	0.0285714	111.107	163.172	191.574	288.853	378.015	290.904	594.528	422.337	272.713	135.88	251.1	261.926
ENSMUSG00000051495	Irf2bp2	3668.07	-1.84193	0.273684	-3.21984	0.00128263	0.0289501	1286.82	3024.62	3104.24	2565.29	6532.68	3501.79	3910.98	4439.67	4254.04	3206.97	4188.76	4001.02
ENSMUSG00000024580	Grpel2	549.44	-1.80506	0.265108	-3.21395	0.00130922	0.0294888	540.383	336.728	360.828	282.74	580.785	613.523	955.713	593.883	671.399	463.765	585.217	608.314
ENSMUSG00000034035	Ccdc17	433.424	-2.18979	0.352408	-3.20877	0.00133303	0.0299628	161.61	190.615	388.727	324.768	763.369	504.161	441.862	623.717	721.235	354.47	327.967	398.584
ENSMUSG00000033953	Ppp3r1	3514.07	1.33736	0.130759	3.20734	0.00133968	0.0300498	4062.47	4233.58	3758.01	3959.88	2945.21	2994.34	2894.44	3140.03	3433.13	3177.43	4217.45	3352.85
ENSMUSG00000018821	Avpi1	2763.34	1.7126	0.24229	3.20353	0.00135754	0.0303875	5406.86	3155.16	3056.81	4184.55	1897.41	3181.35	2178.28	1970.91	1972.67	2431.07	1566.04	2158.99
ENSMUSG00000014776	Nol3	42.792	-7.80972	0.927204	-3.19808	0.00138346	0.030904	0	13.3505	16.7394	1.52832	113.771	71.0856	53.371	9.32312	59.5261	63.0169	35.8714	75.9207
ENSMUSG00000006442	Srm	1768.62	-1.69346	0.237958	-3.19372	0.00140454	0.0313102	1699.93	890.03	1398.67	1345.69	2110.28	2082.26	2623.87	2215.17	1812.09	1120.52	1843.79	2081.18
ENSMUSG00000003355	Fkbp11	165.156	-5.14765	0.740919	-3.19052	0.00142018	0.031331	0	34.1178	63.2379	65.7179	76.1534	247.159	301.608	216.296	340.545	339.701	132.212	165.127
ENSMUSG00000027828	Ssr3	8832.96	-1.45576	0.169796	-3.1907	0.00141927	0.031331	6026.03	6505.38	6443.76	5755.66	7151.08	8910.85	10248.5	9693.25	11762.6	8784.95	13474.3	11239.1
ENSMUSG00000027313	Chac1	340.447	-2.09931	0.33512	-3.19264	0.00140981	0.031331	180.801	215.091	226.912	282.74	591.795	510.723	558.533	241.469	330.855	455.888	280.822	209.731
ENSMUSG00000033855	Ston1	11.5164	88.1976	2.02593	3.18998	0.00142282	0.031331	38.3824	0	0	29.0381	0	0	0	0	9.6903	12.8003	11.2739	37.0113
ENSMUSG00000038806	Sde2	1667.08	1.50463	0.184724	3.19073	0.00141914	0.031331	2576.67	2016.66	1872.03	1671.22	1538.67	1130.81	1479.49	1257.69	1392.63	1760.54	1632.66	1675.95
NA	NA	10.9496	-160.386	2.29482	-3.19215	0.00141218	0.031331	0	0	0	0	41.288	0	59.5769	0	9.6903	0	12.2988	8.54108
ENSMUSG00000087574	C030037D09Rik	39.2705	-4.24577	0.655169	-3.18395	0.00145279	0.0319261	23.2314	13.3505	3.71988	13.7549	48.6281	47.0259	55.8533	77.3819	15.2276	74.8326	45.0955	53.1445
ENSMUSG00000024124	Prss30	877.03	1.6474	0.226511	3.1795	0.0014753	0.0323551	808.05	1190.42	1172.69	1730.06	703.731	844.278	716.164	712.286	689.396	676.447	585.217	695.623
NA	NA	10.0481	-147.133	2.26582	-3.17808	0.00148253	0.0324478	0	0	0	0	8.2576	52.494	0	31.6986	0	16.7389	0	11.3881
ENSMUSG00000026177	Slc11a1	5239.87	1.85371	0.280505	3.17434	0.00150178	0.032803	11763.2	9352.73	4913.03	5411.79	5651.87	3582.71	3456.7	4268.12	3405.45	4627.81	2990.65	3454.39
ENSMUSG00000052212	Cd177	275.439	-2.92092	0.487454	-3.17245	0.0015116	0.0328849	240.395	141.663	156.235	136.021	796.4	730.541	209.76	231.213	132.896	272.745	182.432	74.9717
ENSMUSG00000040433	Zbtb38	25.2609	-23.0616	1.42706	-3.17256	0.00151101	0.0328849	0	0	0	5.34913	63.3083	51.4004	12.4119	0	33.2239	70.894	39.971	26.5722
ENSMUSG00000036299	BC031181	8.21346	87.7152	2.03555	3.17101	0.0015191	0.0329819	13.1308	14.8338	13.0196	25.9815	0	0	0	0	6.92164	0	0	24.6742
ENSMUSG00000055681	Cope	7242.08	-1.58661	0.210254	-3.16736	0.00153828	0.0333315	6021.99	4842.51	5366.85	6515.24	6958.41	9936.67	11222.8	7974.06	9551.87	6077.19	5942.36	6495.01
ENSMUSG00000053158	Fes	2776.85	1.51409	0.189121	3.16437	0.00155421	0.0336093	3326.13	4087.46	3179.56	3635.11	3178.26	2258.33	1799.72	2159.23	2237.07	2687.08	2355.21	2419.02
ENSMUSG00000093327	Mir5107	175.603	2.05656	0.328896	3.1628	0.00156262	0.0337239	220.194	240.308	280.851	314.07	188.09	66.7111	141.495	116.539	127.358	135.88	135.286	140.453
ENSMUSG00000029209	Gnpda2	11.4977	133.653	2.23497	3.15992	0.0015781	0.0339904	35.3522	0	31.619	35.1514	0	0	0	0	0	25.6006	10.249	0
ENSMUSG00000044556	Tex38	9.30048	-114.296	2.16479	-3.1581	0.00158803	0.0341363	0	0	0	0	14.6802	1.09362	49.6474	6.52618	17.9963	21.6621	0	0
ENSMUSG00000029378	Areg	443.783	-2.02717	0.322919	-3.15704	0.0015938	0.0341925	371.703	220.282	239.002	416.468	489.951	561.029	631.763	845.607	225.646	557.306	382.287	384.348
ENSMUSG00000005103	Wdr1	13279.6	1.43205	0.164396	3.15146	0.00162459	0.0347842	17733.7	17892.6	13044.7	15699.7	13299.3	10912.2	9184.77	11551.3	11553.6	11871.8	12341.8	14270.2
ENSMUSG00000031838	Ifi30	14163.5	1.58961	0.212421	3.14786	0.00164472	0.0351457	21573.9	16319.4	16144.3	24663.3	10823.9	15758	11459.9	11468.4	11074.6	12777.7	7601.67	10296.7
ENSMUSG00000024846	Cst6	49.4868	-14.5286	1.22858	-3.1425	0.00167512	0.0357249	19.1912	0	0	12.2266	99.0912	71.0856	198.59	85.7727	62.2948	0	13.3237	32.2663
ENSMUSG00000030654	Arl6ip1	9874.8	1.45402	0.17195	3.14074	0.00168523	0.0358461	16247.9	12314.3	10595.1	11999.6	7362.11	9799.97	8977.49	9043.43	7086.38	9217.21	7536.07	8318.06
ENSMUSG00000037325	Bbs7	77.8112	2.41578	0.405206	3.14036	0.00168742	0.0358461	102.016	123.863	106.016	75.652	58.7207	28.4342	45.9239	35.4279	130.127	70.894	77.8922	78.7677
ENSMUSG00000037913	Tmem156	787.539	1.69623	0.242976	3.13749	0.00170403	0.0360575	800.979	1294.99	1006.23	848.219	667.948	365.271	628.04	667.535	800.142	681.37	801.47	888.272
ENSMUSG00000044982	Sft2d3	206.033	-1.94911	0.306854	-3.1377	0.00170281	0.0360575	158.58	97.1616	167.394	183.399	241.305	380.581	350.014	210.703	197.959	151.634	174.233	159.433
ENSMUSG00000050965	Prkca	632.589	-1.77631	0.264339	-3.13567	0.00171463	0.0362112	343.421	450.207	345.019	285.796	711.071	417.765	578.392	822.299	854.131	665.616	1103.81	1013.54
ENSMUSG00000027315	Spint1	599.995	1.68225	0.240016	3.12641	0.00176954	0.037298	573.715	987.933	799.773	961.315	460.591	495.412	542.398	478.276	357.157	403.702	562.669	576.997
ENSMUSG00000027890	Gstm4	7.2666	86.8517	2.06088	3.12512	0.00177734	0.0373898	32.322	11.1254	13.0196	9.9341	0	0	0	0	0	17.7235	3.07469	0
ENSMUSG00000031906	Smpd3	33.2706	-8.7626	1.00251	-3.12351	0.00178706	0.0375213	0	0	4.64985	12.9907	72.4834	20.7789	16.1354	46.6156	81.6754	59.0784	56.3694	28.4703
NA	NA	143.972	-2.548	0.43222	-3.12194	0.00179663	0.0376493	114.137	61.5604	55.7981	61.8971	153.224	204.508	268.096	121.201	300.399	116.187	117.863	152.79
ENSMUSG00000056216	Cebpg	1559.26	-1.43653	0.167688	-3.11644	0.00183049	0.0382848	1040.36	1391.41	1128.05	1066	1790.98	1340.78	1683.05	1831.06	1709.65	1838.32	2082.59	1808.81
ENSMUSG00000078931	Pdf	679.564	-1.64411	0.230468	-3.11238	0.00185583	0.03874	697.953	433.89	466.845	540.262	655.103	897.866	1005.36	957.484	657.556	485.427	627.237	729.787
ENSMUSG00000038357	Camp	702.551	-12.5002	1.17126	-3.11107	0.0018641	0.0388378	0	111.995	263.181	151.304	2885.57	2575.49	768.294	352.414	458.213	306.223	485.802	72.1246
ENSMUSG00000020869	Lrrc59	7098.83	-1.49147	0.18551	-3.10894	0.00187762	0.0390444	6500.76	5411.38	4832.12	4441.3	7501.57	7804.1	8540.6	7750.31	7723.17	5904.88	9081.62	9694.12
ENSMUSG00000020430	Pes1	3929.5	1.29265	0.119152	3.10803	0.0018834	0.0390704	4570.53	4508	4670.31	5163.44	3370.02	3811.28	3976.76	3475.66	3485.74	3275.9	3219.2	3627.11
ENSMUSG00000085457	1110046J04Rik	10.0203	84.1921	2.05805	3.10761	0.00188608	0.0390704	24.2415	21.5091	18.5994	0	0	0	0	0	0	41.3549	4.09959	10.4391
ENSMUSG00000039936	Pik3cd	8.89979	45.8491	1.77636	3.10682	0.00189111	0.0390997	6.06037	13.3505	10.2297	5.34913	0	0	0	0	13.8433	0	26.6473	31.3173
ENSMUSG00000022092	Ppp3cc	198.481	-2.75401	0.470567	-3.1059	0.00189701	0.039147	54.5434	31.8927	167.394	71.8311	190.842	165.137	318.985	220.958	382.075	170.343	274.673	333.102
ENSMUSG00000040653	Ppp1r14c	10.329	-136.551	2.28852	-3.09952	0.00193835	0.0399242	0	0	0	0	26.6078	0	50.8886	8.39081	0	21.6621	16.3984	0
ENSMUSG00000015709	Arnt2	88.3103	-4.40759	0.690828	-3.09772	0.00195018	0.0400145	36.3622	4.45015	33.4789	38.9722	96.3387	65.6175	224.655	111.877	30.4552	65.9708	146.56	204.986
ENSMUSG00000047250	Ptgs1	1516.53	2.14287	0.355017	3.09716	0.00195382	0.0400145	4107.92	2683.44	1667.43	1373.2	1337.73	816.938	1004.12	1428.3	1067.32	1373.57	528.847	809.504
ENSMUSG00000048732	Klhl11	7.61794	-83.929	2.06327	-3.09756	0.00195119	0.0400145	0	0	0	0	7.34009	29.5279	0	15.8493	0	8.86175	18.4482	11.3881
ENSMUSG00000031883	Car7	6.06765	-96.9102	2.13234	-3.09452	0.0019713	0.0402963	0	0	0	0	16.5152	0	24.8237	19.5786	6.92164	0	3.07469	1.89802
ENSMUSG00000037447	Arid5a	8.69091	-78.5364	2.03664	-3.09102	0.0019947	0.0405515	0	0	0	0	13.7627	13.1235	0	22.3755	13.8433	0	30.7469	10.4391
ENSMUSG00000050578	Mmp13	28.6687	17.0666	1.32421	3.09097	0.00199501	0.0405515	115.147	130.538	5.57981	35.1514	10.0926	6.56175	0	0	24.9179	8.86175	7.17428	0
ENSMUSG00000041323	Ak7	50.7001	-8.42659	0.994742	-3.0912	0.00199347	0.0405515	38.3824	0	9.29969	2.29248	23.8553	125.767	126.601	140.779	19.3806	14.7696	38.9461	68.3286
ENSMUSG00000055546	Timd4	632.997	2.63755	0.45326	3.08696	0.00202215	0.0410261	1547.42	1488.58	547.752	742	682.628	412.296	239.549	304.866	290.709	757.188	183.457	399.533
ENSMUSG00000002204	Napsa	7171.76	1.58594	0.215717	3.08432	0.00204017	0.0413144	12786.4	7380.57	7542.05	10087.7	6035.39	6400.98	6027.2	5368.25	8139.85	6019.1	5160.36	5113.26
ENSMUSG00000073802	Cdkn2b	126.049	-3.08326	0.527013	-3.08238	0.0020535	0.0415067	55.5534	112.737	15.8095	61.1329	270.666	239.504	156.389	91.3666	119.052	112.249	103.515	174.618
ENSMUSG00000032115	Hyou1	12508.2	-1.81327	0.278945	-3.07801	0.00208391	0.042043	7117.91	8655.54	5922.04	5194.77	13513.1	9377.83	13268.3	12600.2	14881.5	9794.21	24533	25239.8
ENSMUSG00000034612	Chst11	1016.4	-1.99299	0.323449	-3.07602	0.00209782	0.0421665	399.985	619.313	676.088	407.298	1065.23	503.067	1216.36	1405.93	1054.86	1260.34	2078.49	1509.87
ENSMUSG00000051851	Rtl8c	1957.63	1.50463	0.191599	3.07624	0.00209628	0.0421665	2429.2	2785.79	2050.58	2812.11	1867.14	1748.71	1700.42	1382.62	1978.21	1945.65	1385.66	1405.48
ENSMUSG00000089704	Galnt2	3870.11	-1.61584	0.225728	-3.06691	0.00216284	0.0433128	3248.36	2681.96	2175.2	1754.51	4614.16	3231.66	3785.62	4297.96	6057.82	3711.11	5263.87	5619.08
ENSMUSG00000048905	Bnip5	35.0198	-6.10001	0.850575	-3.06712	0.00216135	0.0433128	0	14.8338	9.29969	4.58497	88.9986	26.247	33.512	27.9694	49.8358	87.6329	57.3943	19.9292
ENSMUSG00000025795	Rassf3	3878.9	1.40518	0.160087	3.06558	0.00217249	0.0434258	5353.33	4564.37	3995.15	3956.06	3808.59	2945.13	2685.93	3273.35	3945.34	3799.72	4044.25	4175.64
ENSMUSG00000036169	Sostdc1	98.6419	-5.21851	0.778164	-3.06316	0.00219016	0.0436984	64.644	40.0514	0	32.0948	217.45	62.3366	206.037	227.484	70.6008	57.1091	63.5437	142.351
ENSMUSG00000027775	Mfsd1	3406.6	1.53839	0.202915	3.06249	0.00219504	0.0437152	5575.54	5263.79	3393.46	3316.46	2663.54	2965.91	2556.84	3220.21	3315.47	3152.82	2785.67	2669.56
ENSMUSG00000049866	Arl4c	2149.03	1.39028	0.155348	3.06007	0.00221286	0.0439891	3008.98	2652.29	2763.87	2307.77	2068.07	1934.62	1732.69	1982.1	1663.96	2005.71	1581.42	2086.87
ENSMUSG00000022009	Nufip1	772.454	1.57434	0.21425	3.05602	0.002243	0.0443451	1236.32	942.69	1022.04	953.673	769.792	743.665	420.762	702.031	628.485	601.615	646.71	601.671
ENSMUSG00000054855	Rnd1	178.969	2.14795	0.360916	3.05601	0.00224304	0.0443451	288.878	384.196	132.986	225.428	86.2461	130.141	109.224	154.764	181.347	128.988	152.71	172.72
ENSMUSG00000038930	Rccd1	322.267	-1.95425	0.31628	-3.0562	0.00224164	0.0443451	124.238	176.523	325.489	227.72	347.737	409.016	491.509	421.405	462.366	289.484	275.697	316.02
ENSMUSG00000017692	Rhbdl3	90.1336	-5.75901	0.827127	-3.05373	0.00226018	0.0446026	56.5635	0	20.4593	4.58497	107.349	87.49	168.801	102.554	189.653	94.5254	141.436	108.187
ENSMUSG00000022403	St13	4396.41	1.35279	0.142781	3.05317	0.00226437	0.044604	5956.34	4928.54	4459.2	5707.52	3624.17	3834.25	4030.13	4073.27	3667.09	3835.17	4082.17	4559.04
ENSMUSG00000050439	Enthd1	10.8636	77.4212	2.05671	3.05082	0.00228214	0.0447912	42.4226	0	0	16.8115	0	0	0	0	35.9925	5.90784	10.249	18.9802
ENSMUSG00000029925	Tbxas1	1574.02	1.8139	0.281567	3.05112	0.00227992	0.0447912	3669.56	2618.17	1364.26	1621.55	1375.35	1180.02	1387.65	1169.12	1160.07	1386.37	1027.97	928.13
ENSMUSG00000036932	Aifm1	31.0484	-6.84368	0.909865	-3.04965	0.00229104	0.0448781	4.04025	0.741692	10.2297	17.5757	13.7627	37.1832	114.189	58.7357	15.2276	33.4777	13.3237	54.0935
ENSMUSG00000086236	5830418P13Rik	110.306	-3.57448	0.602703	-3.04916	0.00229485	0.0448781	65.654	71.9441	27.8991	25.9815	138.544	90.7708	294.161	161.29	261.638	57.1091	71.7428	56.9405
ENSMUSG00000051499	Zfp786	10.3279	-111.25	2.23179	-3.04584	0.00232032	0.0452943	0	0	0	0	10.0926	13.1235	0	46.6156	51.2202	0.984639	0	1.89802
ENSMUSG00000025321	Itgb8	16.5462	-25.0988	1.52803	-3.04284	0.00234356	0.0456656	0	2.96677	0	0	29.3604	20.7789	28.5473	0	23.5336	5.90784	27.6722	59.7875
ENSMUSG00000095892	Rnu5g	9.59645	-134.086	2.32575	-3.03859	0.00237684	0.0462311	0	0	0	0	10.0926	19.6852	54.6122	0	11.0746	19.6928	0	0
ENSMUSG00000049604	Hoxb13	11.3994	-126.338	2.30314	-3.03114	0.00243631	0.0473029	0	0	0	0	0	0	49.6474	29.834	22.1493	27.5699	0	7.59207
ENSMUSG00000031875	Cmtm3	1493.31	1.67296	0.245055	3.02952	0.0024494	0.0473872	2889.79	2232.49	1533.52	2005.92	1613.9	1098	1211.4	1253.03	843.056	1406.07	820.943	1011.64
ENSMUSG00000022014	Epsti1	6043.57	1.52768	0.201783	3.02972	0.0024478	0.0473872	9129.95	7000.09	6750.65	9701.03	4104.03	6140.7	4649.48	6432.95	4386.94	4808.98	3923.31	5494.76
ENSMUSG00000004709	Cd244a	1635.73	1.53996	0.205915	3.02498	0.00248647	0.0480187	1968.61	1650.26	2393.74	2385.71	1144.14	1357.19	1403.78	1548.57	1083.93	1347.97	1827.39	1517.46
NA	NA	10605	-1.68334	0.248598	-3.02225	0.00250901	0.0483395	5117.98	5159.21	10050.2	6947.75	9352.19	11685.4	12121.4	12754	11199.2	9930.09	16721.2	16221.4
NA	NA	9.80633	84.4113	2.11767	3.02189	0.00251201	0.0483395	0	45.2432	13.0196	6.11329	0	0	0	0	38.7612	0	4.09959	10.4391
ENSMUSG00000073489	Ifi204	619.997	1.95548	0.320331	3.02039	0.0025245	0.0483614	1148.44	1150.36	540.312	940.682	537.662	477.914	268.096	647.957	423.605	517.92	490.926	296.091
ENSMUSG00000031451	Gas6	186.129	3.28186	0.567868	3.01921	0.00253433	0.0483614	673.711	436.115	169.254	191.04	198.182	78.741	23.5825	146.373	105.209	71.8787	63.5437	75.9207
ENSMUSG00000029622	Arpc1b	22502.3	1.43234	0.171625	3.0204	0.00252438	0.0483614	35735	27221.6	23649.1	31412.4	20269.7	24044.4	20144.4	17936.8	17028.6	19962.6	14704.2	17919.2
ENSMUSG00000040659	Efhd2	15161.5	1.51109	0.197276	3.01908	0.00253547	0.0483614	23932.4	18834.5	16363.7	19449.4	14654.5	15737.3	10190.1	11419	9817.66	14432.8	12912.7	14193.4
ENSMUSG00000040794	C1qtnf4	88.8376	-3.50202	0.598715	-3.02011	0.00252681	0.0483614	43.4327	58.5936	67.8877	7.64161	111.019	149.827	246.996	113.742	114.899	39.3856	47.1453	65.4816
ENSMUSG00000017764	Zswim1	225.729	-1.88047	0.302112	-3.01576	0.00256335	0.0488073	95.9559	178.006	163.675	128.379	247.728	297.466	315.261	206.041	192.422	242.221	308.494	333.102
ENSMUSG00000025929	Il17a	87.5338	-9.43845	1.07461	-3.0137	0.00258081	0.0490535	0	0.741692	40.9186	40.5005	147.719	471.352	38.4768	118.404	19.3806	110.28	51.2449	11.3881
ENSMUSG00000043061	Tmem18	467.303	-1.57281	0.217435	-3.0048	0.00265756	0.0504237	241.405	299.643	310.61	384.373	488.116	472.446	557.292	428.864	560.653	584.876	526.797	752.564
ENSMUSG00000030579	Tyrobp	10667.1	1.6873	0.251514	3.00072	0.00269346	0.0509266	19614.4	14552.7	12780.6	16451.6	9031.98	11607.7	8252.64	8681.69	7299.56	10182.2	4458.31	5091.43
ENSMUSG00000032215	Rsl24d1	1402.86	1.46825	0.184645	3.00088	0.00269202	0.0509266	2018.1	1728.14	1667.43	1652.12	1188.18	1259.86	969.366	1392.87	1229.28	1400.16	948.03	1380.81
ENSMUSG00000045817	Zfp36l2	9669.88	-2.11782	0.360974	-2.99906	0.00270813	0.0510259	3912.98	7232.98	7295.61	6292.87	11565.2	5129.1	25208.5	10482.9	8884.62	8225.68	12865.5	8942.51
ENSMUSG00000055733	Nap1l3	134.373	-2.66073	0.47074	-2.99915	0.00270736	0.0510259	104.036	52.6601	56.7281	81.0011	99.0912	165.137	248.237	270.37	74.7537	75.8172	209.079	175.567
ENSMUSG00000009376	Met	367.064	2.39724	0.420788	2.99764	0.00272078	0.0511752	545.434	519.184	292.01	333.174	203.688	183.729	111.707	205.109	191.037	360.378	919.333	539.986
ENSMUSG00000117924	Tmem223	744.694	-1.84145	0.294018	-2.99589	0.00273649	0.0513815	510.081	401.997	633.309	560.13	741.349	1186.58	999.154	950.026	1183.6	711.894	615.964	442.238
ENSMUSG00000005142	Man2b1	22279	1.43732	0.175164	2.98796	0.00280843	0.0526411	30665.5	29982.1	21233.1	22550.4	22478.1	15916.6	15877.2	18382.4	22204.6	21148.1	24181.4	22728.8
ENSMUSG00000026627	Pacc1	821.153	1.65079	0.242074	2.98734	0.00281415	0.0526572	1571.66	1177.06	819.303	806.19	667.031	810.376	614.387	557.523	733.694	719.771	638.511	738.329
ENSMUSG00000037049	Smpd1	991.618	-1.83749	0.293928	-2.98622	0.00282447	0.0527591	757.547	461.332	578.441	576.178	966.139	1089.25	1252.36	1052.58	2183.09	786.727	1214.5	981.275
ENSMUSG00000042109	Csdc2	9.93061	-109.565	2.26973	-2.98522	0.00283371	0.0528407	0	0	0	0	64.2258	3.28087	1.24119	0	33.2239	0	14.3486	2.84703
ENSMUSG00000031202	Rab39b	115.925	-3.08675	0.545077	-2.98323	0.00285227	0.0530954	35.3522	51.1767	34.4089	30.5664	107.349	29.5279	119.154	211.635	156.429	101.418	316.693	197.394
ENSMUSG00000028369	Svep1	11.0568	173.58	2.49838	2.97771	0.00290411	0.0539677	117.167	0	5.57981	9.9341	0	0	0	0	0	0	0	0
ENSMUSG00000054555	Adam12	8.56443	-127.682	2.35404	-2.97208	0.00295787	0.0546956	0	0	0	0	60.5558	0	0	19.5786	0	9.84639	6.14939	6.64306
ENSMUSG00000046062	Ppp1r15b	5049.21	-1.53853	0.209124	-2.97215	0.00295722	0.0546956	2840.29	3966.57	3422.29	2671.51	6522.59	4032.19	4613.49	4679.27	6394.21	5805.43	8884.84	6757.89
ENSMUSG00000111342	4933404K13Rik	67.4824	-3.97157	0.66948	-2.97202	0.00295843	0.0546956	12.1207	9.64199	45.5685	19.104	105.514	69.992	132.807	34.4955	191.037	91.5715	40.9959	56.9405
ENSMUSG00000091337	Eid1	3285.88	1.5657	0.217756	2.97034	0.00297467	0.0548089	4409.93	3668.41	5029.27	4796.64	2557.1	3694.26	2507.19	2676.67	2051.57	3544.7	2080.54	2414.28
ENSMUSG00000039043	Arpin	1065.46	1.75451	0.27305	2.97039	0.00297423	0.0548089	1769.63	1093.25	1313.12	1817.18	819.338	1297.04	582.116	716.948	681.09	819.22	825.043	1051.5
ENSMUSG00000067750	Khdc1a	9.18959	122.021	2.33385	2.96977	0.00298025	0.0548184	1.01006	18.5423	53.0082	20.6324	0	0	0	0	0	0	0	17.0822
ENSMUSG00000035004	Igsf6	2028.27	1.99587	0.335851	2.96864	0.00299123	0.054927	4630.12	3827.87	1955.73	2219.89	2218.54	1371.41	853.936	1884.2	1352.49	1897.4	1024.9	1102.75
ENSMUSG00000045795	Whamm	999.456	-1.51821	0.203126	-2.96552	0.00302176	0.0553938	619.168	901.155	741.185	722.132	1486.37	1020.35	1036.39	987.318	988.411	1202.24	1278.05	1010.69
ENSMUSG00000022488	Nckap1l	11197.1	1.55132	0.213673	2.96478	0.003029	0.0554327	15517.6	14334.7	10443.6	11486.9	9476.98	6581.43	7215.01	10104.4	9291.61	11188.5	15168.5	13555.6
ENSMUSG00000106847	Peg13	1695.13	-1.82546	0.293023	-2.96311	0.0030455	0.0556406	1299.95	1109.57	904.86	603.687	1895.58	1038.94	1925.08	2290.69	2887.71	1553.76	2414.66	2417.12
ENSMUSG00000098973	Mir6236	958.464	-2.68559	0.481237	-2.96162	0.00306029	0.0558169	398.975	562.944	391.517	348.457	658.773	766.631	1153.06	1992.35	2875.25	851.713	353.59	1148.3
NA	NA	234.846	-1.93097	0.320714	-2.96004	0.00307602	0.0560095	109.087	132.763	254.812	132.964	251.398	301.84	315.261	346.82	227.03	273.73	177.307	295.142
ENSMUSG00000063727	Tnfrsf11b	7.95636	70.9928	2.07796	2.95944	0.00308204	0.0560248	22.2214	17.0589	11.1596	3.82081	0	0	0	0	0	19.6928	21.5229	0
ENSMUSG00000068245	Phf11d	159.266	2.28197	0.402296	2.95872	0.00308922	0.0560614	171.711	226.216	300.38	280.447	74.3184	69.992	209.76	76.4496	139.817	129.972	122.988	109.136
ENSMUSG00000015027	Galns	114.266	-2.15469	0.374473	-2.95744	0.00310205	0.0562	61.6138	75.6526	38.1287	90.171	139.462	132.329	201.072	101.622	106.593	126.034	160.909	137.606
ENSMUSG00000030881	Arfip2	1268.33	-1.68811	0.255672	-2.95462	0.00313053	0.0566213	455.538	944.174	988.557	1115.68	1364.34	1447.96	1817.1	1289.39	1612.74	1256.4	1389.76	1538.34
ENSMUSG00000029640	Usp12	3915.11	1.60967	0.232837	2.94957	0.00318214	0.0574589	4917.99	5286.04	3795.2	3984.34	3375.52	2259.43	2056.64	3478.46	3589.56	4146.32	6049.97	4041.83
ENSMUSG00000027447	Cst3	222277	1.57755	0.223291	2.9454	0.00322542	0.0581433	319653	285069	248910	363849	177073	268588	179114	146983	188851	212548	131608	145079
ENSMUSG00000042684	Npl	340.061	2.55786	0.46016	2.94449	0.00323487	0.0582169	612.098	752.817	565.421	446.27	256.903	281.062	177.49	213.499	130.127	441.118	62.5188	141.402
ENSMUSG00000113535	AU015791	37.7862	-6.99828	0.953653	-2.94342	0.0032461	0.0583221	14.1409	0	5.57981	19.8682	85.3286	146.546	22.3413	22.3755	49.8358	17.7235	18.4482	51.2465
ENSMUSG00000069237	Fam8a1	8.02514	-26.0642	1.5991	-2.94166	0.00326456	0.0583655	2.02012	1.48338	0	0	28.4429	13.1235	11.1707	37.2925	2.76866	0	0	0
ENSMUSG00000067916	Zfp991	48.6277	2.99821	0.538518	2.94159	0.00326528	0.0583655	111.107	80.1027	80.9073	69.5387	25.6903	31.7151	19.859	36.3602	33.2239	58.0937	24.5975	12.3371
ENSMUSG00000025429	Pstpip2	810.749	1.75711	0.276389	2.94226	0.00325828	0.0583655	1119.15	1253.46	689.107	1056.07	767.957	564.31	394.697	615.326	534.351	976.762	938.806	818.994
ENSMUSG00000029672	Fam3c	1072.63	1.57534	0.222929	2.94114	0.00327006	0.0583655	1877.71	1214.89	1069.46	1210.43	787.225	772.099	897.377	952.823	955.187	1282.99	817.868	1033.47
ENSMUSG00000035557	Krt17	7.85025	-129.02	2.38595	-2.93864	0.00329658	0.0586455	0	0	0	0	49.5456	5.46812	26.0649	0	11.0746	0	2.0498	0
ENSMUSG00000066755	Tnfsf18	75.1474	2.54497	0.458554	2.93891	0.00329366	0.0586455	182.821	110.512	74.3975	116.152	54.1332	65.6175	26.0649	43.8187	41.5299	81.7251	59.4441	45.5524
ENSMUSG00000027782	Kpna4	6674.53	1.59664	0.23002	2.93471	0.00333855	0.0592949	8674.41	9069.41	6123.85	6357.06	5889.51	4844.76	2844.8	5348.67	6965.94	9004.53	7764.63	7206.77
ENSMUSG00000034949	Zfr2	58.0834	-2.73725	0.495304	-2.93301	0.00335698	0.0593314	23.2314	29.6677	42.7786	16.8115	72.4834	51.4004	105.501	78.3142	107.978	68.9248	42.0208	57.8895
ENSMUSG00000028757	Ddost	9957.56	-1.43529	0.177752	-2.933	0.00335704	0.0593314	9137.02	7011.95	7032.43	7860.93	9921.97	11746.6	12554.6	10331.9	14107.7	8711.1	10648.7	10425.8
ENSMUSG00000030173	Klra5	130.214	2.37962	0.426396	2.93327	0.00335413	0.0593314	204.033	224.733	250.162	194.097	110.101	143.265	42.2003	70.8557	42.9142	116.187	74.8175	89.2068
ENSMUSG00000011884	Gltp	5752.09	1.47717	0.192121	2.92961	0.00339387	0.0598847	9138.03	7675.77	5810.45	6671.89	6274.86	4311.07	4061.16	5182.72	5347.66	5400.75	4631.51	4519.18
ENSMUSG00000015733	Capza2	10447.7	1.36821	0.15448	2.92783	0.0034134	0.0600338	14793.4	12290.6	10922.5	13538.6	9038.4	10397.1	9284.07	8953.92	9338.68	10787.7	7879.41	8148.19
ENSMUSG00000092341	Malat1	22782.7	-2.0743	0.359494	-2.92806	0.0034108	0.0600338	6066.43	15970.8	11318.7	15404.7	32824.9	14858	25155.1	28307.8	29468.2	17688.1	54464.1	21865.2
ENSMUSG00000062110	Scfd2	17.9741	-13.2262	1.27325	-2.92583	0.00343541	0.0603155	8.0805	0	0	0	5.50507	44.8386	37.2356	14.917	13.8433	26.5853	27.6722	37.0113
ENSMUSG00000026315	Serpinb8	490.923	2.20409	0.389757	2.92536	0.00344056	0.0603155	662.601	1162.23	443.595	618.971	486.281	376.207	208.519	238.672	263.022	645.923	284.922	500.127
ENSMUSG00000038349	Plcl1	154.074	3.12986	0.562981	2.9239	0.0034568	0.0605023	383.824	368.621	110.666	97.0485	120.194	68.8983	19.859	96.9605	101.056	187.081	147.585	147.096
ENSMUSG00000006304	Arpc2	605.623	1.55677	0.218654	2.92042	0.00349564	0.0610835	925.217	726.116	636.099	721.368	487.199	531.502	377.32	535.147	524.661	730.602	600.59	471.657
ENSMUSG00000031129	Slc9a9	2209	1.63131	0.241808	2.91981	0.0035025	0.0611048	3342.3	3268.64	2197.52	2276.44	1657.94	1688.56	1062.45	2383.92	1939.44	2263.69	2269.12	2158.05
ENSMUSG00000046442	Ppm1e	31.4549	3.3533	0.60008	2.90892	0.00362684	0.0630709	48.483	61.5604	33.4789	39.7364	18.3502	10.9362	11.1707	13.9847	27.6866	25.6006	65.5935	20.8782
NA	NA	135.217	-2.20489	0.392094	-2.90927	0.00362279	0.0630709	55.5534	61.5604	119.966	55.0196	112.854	143.265	153.907	233.078	228.414	141.788	131.187	186.006
ENSMUSG00000071540	3425401B19Rik	15.2728	-82.979	2.19187	-2.90833	0.00363367	0.0630884	0	0	0	0	24.7728	27.3406	0	0	24.9179	83.6944	22.5477	0
ENSMUSG00000032513	Gorasp1	416.068	-1.96242	0.334958	-2.90375	0.0036872	0.0637089	220.194	273.684	215.753	263.636	433.065	330.275	803.047	345.888	660.325	310.161	498.1	638.683
ENSMUSG00000022651	Retnlg	346.474	-3.74532	0.656188	-2.90327	0.00369293	0.0637089	380.793	100.87	99.5067	130.672	1126.7	1087.06	182.454	267.574	347.466	296.376	85.0665	53.1445
ENSMUSG00000054702	Ap1s3	1001.59	1.68828	0.260224	2.90349	0.00369033	0.0637089	773.708	1307.6	1348.46	1245.58	927.604	534.782	711.199	595.747	1071.47	957.07	1572.19	973.683
ENSMUSG00000100837	1700063D05Rik	22.6487	-25.2221	1.60362	-2.90381	0.00368652	0.0637089	0	0	0	6.11329	3.67005	20.7789	112.948	20.5109	13.8433	77.7865	0	16.1331
ENSMUSG00000044072	Eml6	407.332	-2.71114	0.495852	-2.90187	0.00370941	0.0637902	56.5635	338.953	108.806	114.624	499.126	179.354	307.814	693.64	584.187	484.443	886.537	633.938
ENSMUSG00000114213	A430090L17Rik	7.87157	-125.689	2.40291	-2.90219	0.00370558	0.0637902	0	0	0	0	6.42258	13.1235	59.5769	0	0	0	2.0498	13.2861
ENSMUSG00000097167	Gm16740	83.9461	-2.55274	0.466112	-2.90069	0.00372345	0.06393	37.3723	72.6858	44.6385	51.963	111.936	117.018	203.554	96.9605	74.7537	100.433	66.6184	29.4193
ENSMUSG00000046447	Camk2n1	165.309	-2.23696	0.400878	-2.89749	0.00376167	0.0644841	103.026	114.962	69.7477	109.275	178.915	123.58	280.508	305.798	128.743	120.126	283.897	165.127
ENSMUSG00000026012	Cd28	2096.1	-1.72625	0.271969	-2.89605	0.00377887	0.0646766	1349.44	1150.36	1433.08	1284.55	1565.27	1387.81	2849.76	3203.42	3125.81	1959.43	3143.36	2700.88
ENSMUSG00000078439	Smim24	214.517	1.9239	0.32616	2.89438	0.00379908	0.06492	365.642	287.776	343.159	333.174	123.864	135.609	214.725	217.229	127.358	215.636	106.589	103.442
ENSMUSG00000042015	Wdr41	863.38	1.6372	0.245918	2.89216	0.003826	0.0652769	1161.57	1300.93	927.179	1009.46	668.866	573.059	623.075	821.367	508.049	1111.66	824.018	831.331
ENSMUSG00000005800	Mmp8	125.885	-4.84303	0.787572	-2.88978	0.00385511	0.0656702	90.9056	31.1511	35.3388	59.6046	640.423	265.751	89.3654	54.0741	29.0709	94.5254	113.764	6.64306
ENSMUSG00000034039	Prss29	18.7494	-15.9865	1.38672	-2.88361	0.00393139	0.0667597	0	1.48338	0	6.87745	6.42258	30.6215	33.512	66.1942	41.5299	10.831	0	27.5212
ENSMUSG00000039497	Dse	914.271	1.87931	0.315596	2.88407	0.00392569	0.0667597	2144.36	1257.17	856.502	842.87	668.866	587.276	605.699	851.201	611.873	833.99	1094.59	616.855
ENSMUSG00000042842	Serpinb6b	8528.11	1.45903	0.189042	2.88303	0.00393876	0.0667801	12228.8	11188.4	8725.9	12215.1	6056.49	9121.92	6968.02	8256.56	5469.48	6634.5	7631.39	7840.71
ENSMUSG00000032508	Myd88	2500.82	1.33374	0.144188	2.88151	0.00395778	0.0669979	3486.73	2989.76	2669.01	3163.63	2444.25	2475.97	2283.78	2024.98	2271.68	1893.46	2063.12	2243.46
ENSMUSG00000072109	A530040E14Rik	586.618	-1.84833	0.30761	-2.88099	0.00396433	0.0670039	333.321	345.628	376.638	443.213	592.712	652.894	990.466	536.079	920.578	422.41	487.851	937.62
ENSMUSG00000023266	Frs3	29.6521	-7.55273	1.01346	-2.87825	0.00399885	0.0674822	0	19.284	6.50978	2.29248	36.7005	54.6812	24.8237	97.8928	27.6866	59.0784	4.09959	22.7762
ENSMUSG00000037731	Themis2	3511.76	1.50461	0.204859	2.87704	0.00401428	0.0675096	3835.21	5220.77	3438.1	3815.46	3572.79	2391.76	2186.97	2686.92	3822.13	3421.62	4482.9	3266.49
ENSMUSG00000026011	Ctla4	70.5454	-3.80688	0.670436	-2.87665	0.00401917	0.0675096	38.3824	28.1843	7.43975	52.7271	109.184	156.388	125.36	92.2989	13.8433	84.679	108.639	29.4193
ENSMUSG00000021495	Fam193b	1643.44	-1.60981	0.2387	-2.87762	0.00400692	0.0675096	765.627	1532.34	1399.6	1434.33	2462.6	1487.33	2209.31	2104.23	1823.16	1399.17	1516.85	1586.74
ENSMUSG00000026600	Soat1	1651.84	1.57054	0.226477	2.87562	0.00403235	0.0676261	2411.02	2173.9	1743.69	1685.74	1372.6	1017.07	1144.37	1567.22	1353.87	1325.32	2199.43	1827.79
ENSMUSG00000030483	Cyp2b10	8.19118	-109.079	2.3569	-2.87209	0.00407772	0.0682813	0	0	0	0	16.5152	10.9362	0	41.0217	0	22.6467	7.17428	0
NA	NA	275.824	-2.08848	0.37007	-2.87095	0.00409235	0.0684206	97.976	215.091	259.461	152.068	311.954	236.223	526.263	440.051	325.317	182.158	327.967	235.354
ENSMUSG00000051124	Gimap9	1424.69	-1.61345	0.240669	-2.86761	0.00413582	0.0689346	1061.58	810.669	1394.95	1264.69	1200.1	1799.01	2556.84	1757.41	1345.57	1277.08	1263.7	1364.67
ENSMUSG00000042901	Aida	918.821	1.49026	0.200707	2.8677	0.00413466	0.0689346	1321.16	967.166	1241.51	895.597	656.938	868.338	626.799	815.773	777.993	950.177	1021.82	882.578
ENSMUSG00000035478	Mbd3	9.18107	38.0954	1.83483	2.86214	0.00420796	0.0700293	0	4.45015	12.0896	31.3306	0	0	1.24119	0	9.6903	27.5699	1.0249	22.7762
ENSMUSG00000034041	Lyl1	820.173	-1.66296	0.256698	-2.85843	0.00425749	0.0706366	484.83	488.775	713.286	865.03	851.451	1326.57	1092.24	975.198	978.72	799.527	660.034	606.416
ENSMUSG00000006699	Cdc42	14725.5	1.34395	0.149188	2.85866	0.00425437	0.0706366	21263.8	16731.1	15617.9	17419.1	11890	14794.6	13550	12618.8	14719.6	13716	11454.3	12931.2
ENSMUSG00000037139	Myom3	7.41274	49.7005	1.97334	2.85565	0.00429483	0.0710385	9.09056	34.8595	18.5994	0	0.917511	0	0	0	0	9.84639	6.14939	9.49008
ENSMUSG00000035000	Dpp4	1965.11	1.52489	0.213127	2.85606	0.00428939	0.0710385	1684.78	2175.38	2706.21	2904.58	1178.08	1655.75	1567.62	1810.55	1730.41	1883.62	1942.18	2342.15
ENSMUSG00000024400	Wdr33	1056.24	-1.50938	0.208104	-2.85411	0.00431579	0.0712763	614.118	826.986	672.368	732.066	1149.64	933.955	1045.08	1167.25	1499.23	921.622	1599.87	1512.72
ENSMUSG00000032724	Abtb2	608.541	-1.69203	0.26595	-2.85299	0.00433104	0.0714193	585.836	461.332	387.797	311.778	952.377	458.229	831.594	711.354	625.716	617.369	642.611	716.501
ENSMUSG00000042073	Abhd14b	271.07	-2.04358	0.361631	-2.85124	0.0043549	0.0715948	275.747	77.1359	166.464	178.05	389.942	293.091	341.326	398.097	383.459	221.544	222.403	305.581
ENSMUSG00000037621	Atoh8	89.6001	-2.82942	0.526205	-2.85156	0.00435051	0.0715948	26.2616	59.3353	15.8095	69.5387	160.564	84.2091	160.113	81.1111	159.198	70.894	93.2657	94.9008
ENSMUSG00000001029	Icam2	1105.22	-1.70057	0.268711	-2.8507	0.00436228	0.0716075	1018.14	757.267	849.992	771.803	1174.41	1408.59	2036.79	1157.93	1540.76	791.65	764.574	990.765
ENSMUSG00000041361	Myzap	467.468	-2.84087	0.528691	-2.84917	0.00438333	0.0718442	218.173	22.2508	260.391	307.193	383.52	424.326	907.307	579.898	473.44	454.903	807.619	770.595
ENSMUSG00000000439	Mkrn2	691.726	-1.44324	0.185869	-2.84775	0.00440294	0.0720566	392.914	433.89	555.192	571.593	659.691	754.601	695.064	711.354	775.224	850.728	891.661	1008.8
ENSMUSG00000033955	Tnks1bp1	694.064	-1.61652	0.243372	-2.84706	0.00441249	0.072104	466.649	396.805	522.643	330.118	789.977	542.438	573.428	865.186	931.653	838.913	1246.28	824.688
ENSMUSG00000027953	Slc50a1	1645.17	-1.56237	0.22622	-2.8456	0.00443282	0.072327	1399.95	1013.15	1361.47	1596.33	1702.9	2062.58	2818.73	1808.69	1917.29	1432.65	1198.11	1430.16
ENSMUSG00000024778	Fas	11.3511	38.4261	1.85027	2.845	0.00444108	0.0723529	18.1811	0	11.1596	19.104	0.917511	0	0	0	65.0634	16.7389	4.09959	0.949008
ENSMUSG00000025068	Gsto1	2572.87	1.61134	0.242409	2.83924	0.0045221	0.0735622	4624.06	3739.61	3115.4	3530.42	2312.13	2879.51	1884.12	2238.48	1753.94	2305.04	1046.42	1445.34
ENSMUSG00000025503	Taldo1	22380	1.44675	0.187814	2.83693	0.00455503	0.0739867	29871.6	26878.9	26971	32801.6	17940.1	24930.3	20014.1	17658	18763.2	22902.7	13681.4	16147.4
ENSMUSG00000057778	Cyb5d2	239.32	-2.04249	0.363476	-2.83465	0.00458762	0.0740719	242.415	126.088	132.986	77.1803	255.068	231.848	325.191	367.331	311.474	188.066	271.598	342.592
ENSMUSG00000019822	Smpd2	413.191	-1.63102	0.248972	-2.83476	0.00458608	0.0740719	317.16	244.017	429.646	350.75	466.096	437.45	683.893	600.409	402.84	332.808	390.486	302.734
ENSMUSG00000047751	Utf1	98.8601	2.09887	0.377293	2.83497	0.004583	0.0740719	213.123	129.054	154.375	110.803	86.2461	78.741	45.9239	77.3819	60.9105	100.433	67.6432	61.6855
ENSMUSG00000030101	Sumf1	1765.12	1.32681	0.143877	2.8355	0.00457543	0.0740719	2037.3	1674.74	1969.67	2217.6	1372.6	1636.06	1488.18	1457.2	1799.63	1948.6	1924.76	1655.07
ENSMUSG00000008206	Cers4	759.617	-1.80868	0.301662	-2.83409	0.00459558	0.0740901	458.568	299.643	603.55	591.461	761.534	870.525	983.019	917.395	1352.49	512.997	833.242	930.977
ENSMUSG00000040591	1110051M20Rik	6.05348	-105.843	2.37417	-2.8329	0.00461276	0.0742366	0	0	0	0	11.9276	0	35.9944	18.6462	0	0	5.12449	0.949008
ENSMUSG00000000915	Hip1r	2448.01	-1.46704	0.195199	-2.83251	0.00461838	0.0742366	1558.53	1794.89	2229.14	1699.49	2847.96	2128.19	2637.52	3068.24	3157.65	2157.34	3316.57	2780.59
ENSMUSG00000050379	Septin6	1690.9	1.39427	0.169405	2.83053	0.00464703	0.0744763	2285.77	1919.5	1731.6	2342.15	1607.48	1602.16	1185.33	1541.11	1432.78	1389.33	1633.69	1619.96
NA	NA	46.8274	-6.67132	0.967152	-2.83096	0.00464082	0.0744763	0	35.6012	13.0196	3.82081	100.926	64.5238	131.566	55.0064	17.9963	29.5392	100.44	9.49008
ENSMUSG00000028701	Lurap1	49.8825	-12.0603	1.26959	-2.82941	0.00466341	0.0746284	0	15.5755	0	6.11329	33.9479	98.4262	132.807	0	170.272	44.3088	43.0457	54.0935
ENSMUSG00000021794	Glud1	5954.37	1.35442	0.154789	2.82756	0.0046904	0.0749496	6630.05	7697.28	6189.87	6498.43	5109.62	4901.63	4448.41	5485.72	4940.67	5922.61	7208.11	6420.04
ENSMUSG00000000753	Serpinf1	603.77	1.75026	0.285945	2.82422	0.00473956	0.0754523	769.667	863.329	730.956	821.473	513.806	549	409.591	347.752	618.795	862.544	385.362	372.96
ENSMUSG00000028085	Gatb	393.429	1.61103	0.243619	2.82401	0.00474276	0.0754523	554.524	448.724	529.152	583.819	261.491	323.713	330.155	398.097	423.605	227.452	305.42	335
ENSMUSG00000040795	Iqcc	209.088	-1.72629	0.278913	-2.82409	0.00474148	0.0754523	141.409	160.947	199.013	172.7	246.811	237.317	322.708	357.076	164.735	131.942	147.585	226.813
ENSMUSG00000009108	Gnat2	57.2632	-2.83566	0.532669	-2.82293	0.00475872	0.0755953	22.2214	6.67523	43.7085	22.9248	56.8857	65.6175	62.0593	84.8404	69.2164	93.5407	90.191	69.2776
ENSMUSG00000045730	Adrb2	1484.63	-1.64842	0.255715	-2.81985	0.00480455	0.0762115	810.07	1160.01	1155.02	1208.9	1548.76	1231.42	2626.35	1740.63	1892.38	1826.51	1410.26	1205.24
ENSMUSG00000024769	Cdc42bpg	612.192	-2.1377	0.389002	-2.81763	0.00483801	0.0765475	170.701	493.225	383.147	230.013	1163.4	371.832	448.068	746.782	873.511	892.083	962.379	611.161
ENSMUSG00000060098	Prmt7	1498.67	-1.76101	0.289762	-2.8175	0.00483986	0.0765475	914.106	953.074	1162.46	1094.28	1533.16	1618.56	2530.78	1581.2	2342.28	799.527	1591.67	1862.9
ENSMUSG00000002076	Hsf2bp	11.1423	-180.142	2.66191	-2.81489	0.00487934	0.0770594	0	0	0	0	0	0	84.4006	28.9017	19.3806	0	1.0249	0
ENSMUSG00000015568	Lpl	914.894	2.2952	0.426004	2.81364	0.00489845	0.0771364	2657.47	1875	620.289	820.709	911.089	509.629	448.068	732.797	578.649	985.624	403.81	435.595
NA	NA	6.50783	61.9141	2.11533	2.81384	0.00489536	0.0771364	19.1912	8.9003	9.29969	9.9341	0	0	0	0	19.3806	0	0	11.3881
ENSMUSG00000024725	Ostf1	9004.37	1.42291	0.180982	2.8116	0.00492953	0.0775131	12906.6	10253.9	10146	12935	7196.04	9399.7	8329.6	7573.17	8362.73	8346.79	5411.46	7191.59
ENSMUSG00000039568	Ubald1	1970.09	-1.38864	0.168715	-2.8075	0.00499271	0.0783928	1625.19	1455.94	1633.03	1609.32	2377.27	2263.8	2080.23	2058.54	2776.96	1878.69	1778.2	2103.95
ENSMUSG00000032554	Trf	16969.3	1.98351	0.353389	2.79594	0.00517484	0.0811348	43982.1	27893.5	16391.6	16357.6	15340.8	9411.73	11168.2	16825.4	12025.7	18350.7	6013.07	9870.64
ENSMUSG00000004530	Coro1c	2743	1.45258	0.192698	2.79514	0.00518774	0.0812196	3865.51	3564.57	3199.09	2631.01	2842.45	2010.08	1989.62	2284.16	2039.12	2926.35	2781.57	2782.49
ENSMUSG00000047344	Lancl3	14.3838	-23.1646	1.6228	-2.79385	0.00520854	0.0814276	0	0	0	3.05664	0	26.247	29.7885	17.7139	24.9179	60.063	5.12449	5.69405
ENSMUSG00000045302	Preb	204.727	-2.0349	0.366966	-2.79306	0.0052212	0.0815079	85.8553	176.523	76.2575	151.304	234.883	199.04	263.131	302.069	323.933	158.527	298.245	186.955
ENSMUSG00000037166	Ppp1r14a	361.814	2.09941	0.38325	2.79186	0.00524055	0.0816923	650.48	519.184	423.136	698.443	229.378	374.02	304.09	184.598	290.709	394.84	160.909	111.983
ENSMUSG00000020571	Pdia6	21788.1	-1.52415	0.217956	-2.78957	0.00527773	0.0821537	19264.9	15924.9	13200.9	16079.5	20908.2	25550.4	30052.8	21751.8	34833.9	17984.4	21656.1	24250
ENSMUSG00000039981	Zc3h12d	2220.83	-1.72056	0.280846	-2.78758	0.00531039	0.0825434	991.881	1466.32	1404.25	1331.17	2542.42	1432.65	2600.28	2361.55	4529.52	1734.93	2960.93	3294.01
ENSMUSG00000038168	P3h2	1438.45	1.7355	0.285873	2.7822	0.00539914	0.0838028	1774.68	2248.81	1575.37	1817.94	1712.99	812.563	647.899	1098.26	1208.52	1413.94	1115.09	1835.38
ENSMUSG00000026739	Bmi1	1660.93	-1.61632	0.249048	-2.78143	0.00541192	0.0838808	1260.56	1013.89	870.451	861.974	1234.97	1320	1995.83	1925.22	3258.71	1697.52	2402.36	2089.72
ENSMUSG00000009828	Cilk1	10.483	-87.9146	2.32536	-2.77721	0.00548274	0.0845253	0	0	0	0	0	21.8725	33.512	0	0	17.7235	45.0955	7.59207
ENSMUSG00000033825	Tpsb2	8.79644	127.451	2.51839	2.7771	0.00548471	0.0845253	36.3622	0	12.0896	48.9063	0	0	0	0	0	0	8.19918	0
ENSMUSG00000049421	Zfp260	977.971	-1.58267	0.238395	-2.77842	0.00546247	0.0845253	753.506	569.619	677.948	641.131	910.171	785.222	1423.64	1062.84	1208.52	881.252	1569.12	1252.69
ENSMUSG00000021113	Snapc1	1080.88	1.34852	0.155326	2.77723	0.00548236	0.0845253	1302.98	1358.04	1078.76	1237.94	989.995	914.27	850.212	936.041	1144.84	964.947	1222.7	969.887
ENSMUSG00000027997	Casp6	2266.15	1.50692	0.213117	2.77593	0.00550434	0.0847075	2975.64	2357.84	2846.64	3347.79	1807.5	2596.26	1854.33	1392.87	2142.94	2301.1	1612.16	1958.75
ENSMUSG00000056592	Zfp658	307.845	-2.31657	0.436769	-2.7749	0.00552189	0.0847783	251.505	158.722	103.227	76.4161	384.437	243.878	237.066	498.787	598.03	187.081	465.304	489.688
ENSMUSG00000015994	Fnta	2080.82	1.3566	0.158571	2.77474	0.0055246	0.0847783	2865.55	2228.04	2526.73	2608.85	1501.97	1913.84	2154.7	1970.91	1913.14	1903.31	1737.2	1645.58
ENSMUSG00000017781	Pitpna	8228.14	1.307	0.139259	2.77366	0.00554302	0.0848208	11644	9923.09	8136.3	9203.56	7581.4	7972.52	7228.66	6984.88	7745.32	7197.71	7185.56	7934.66
ENSMUSG00000001687	Ubl3	14.4526	8.82046	1.13225	2.774	0.0055372	0.0848208	43.4327	20.7674	18.5994	25.9815	2.75253	0	9.92948	0	23.5336	14.7696	5.12449	8.54108
ENSMUSG00000047875	Gpr157	329.742	1.73514	0.28678	2.77234	0.00556542	0.0850434	337.361	476.166	354.318	476.072	225.708	194.665	278.026	249.86	199.343	361.363	464.279	339.745
ENSMUSG00000037553	Zdhhc18	2333.21	-1.4645	0.198575	-2.77179	0.00557488	0.085068	1431.26	1915.79	1859.94	1761.39	3233.31	1807.76	2570.5	2593.69	2819.88	2236.12	2972.2	2796.73
ENSMUSG00000033182	Kbtbd12	79.7366	-2.51058	0.479616	-2.76893	0.0056241	0.0856403	26.2616	41.5347	62.3079	24.4532	66.0608	135.609	89.3654	96.9605	163.351	87.6329	103.515	59.7875
ENSMUSG00000027832	Ptx3	5.28442	76.5925	2.26098	2.76833	0.00563445	0.0856403	17.1711	22.2508	8.36972	10.6983	0	0	0	0	0	4.9232	0	0
ENSMUSG00000030283	St8sia1	163.948	2.24771	0.422138	2.76795	0.00564093	0.0856403	196.962	304.094	263.181	267.456	59.6382	102.801	148.942	148.238	48.4515	178.22	112.739	136.657
ENSMUSG00000045679	Pqlc3	2729.35	-1.9368	0.344563	-2.76778	0.00564401	0.0856403	1937.3	1030.95	1414.48	1529.09	2089.17	2907.95	3840.23	2612.34	7418.62	3213.86	2382.89	2375.37
ENSMUSG00000060181	Slc35e3	175.221	-2.13578	0.395614	-2.76725	0.00565311	0.0856585	116.157	87.5196	77.1874	129.143	272.501	178.261	165.078	259.183	105.209	136.865	287.996	287.55
ENSMUSG00000000531	Grasp	3706.08	1.6518	0.261854	2.76506	0.00569127	0.0861163	4822.04	4961.18	4641.48	4558.22	4166.42	3148.55	1669.39	2506.05	3287.78	4797.16	2543.8	3370.88
ENSMUSG00000028788	Ptp4a2	110.05	1.91231	0.338451	2.76353	0.00571807	0.0864011	159.59	182.456	132.986	92.4635	69.7309	71.0856	84.4006	71.788	143.97	120.126	106.589	85.4108
ENSMUSG00000040390	Map3k10	644.168	-1.6198	0.252043	-2.76071	0.00576759	0.0869069	536.343	265.526	532.872	590.697	797.317	666.017	939.577	715.083	688.011	619.338	683.607	695.623
ENSMUSG00000060519	Tor3a	1409.44	1.46765	0.200477	2.76096	0.00576312	0.0869069	2328.19	2032.98	1367.98	1609.32	1361.59	1031.29	1164.23	1441.35	1226.52	1180.58	1113.04	1056.25
ENSMUSG00000021595	Nsun2	3603.39	1.33452	0.150848	2.75985	0.00578279	0.0870149	4007.93	4392.3	4261.12	3272.9	2922.27	3342.12	2605.25	3069.17	3708.62	3471.84	4282.02	3905.17
ENSMUSG00000029014	Dnajc2	2091.66	1.35543	0.15901	2.75927	0.00579304	0.0870482	2747.37	2733.88	2401.18	2449.14	1675.38	1920.4	2049.2	1978.37	1387.1	1805.83	1915.53	2036.57
ENSMUSG00000079559	Colca2	17.9394	-27.3179	1.73074	-2.75707	0.00583224	0.0872242	0	0	6.50978	0	20.1853	102.801	42.2003	10.2554	9.6903	23.6313	0	0
ENSMUSG00000021702	Thbs4	6.8423	-101.448	2.41665	-2.75779	0.00581944	0.0872242	0	0	0	0	18.3502	21.8725	23.5825	0	15.2276	0	3.07469	0
ENSMUSG00000053040	Aph1c	1360.45	1.79124	0.305046	2.75684	0.00583631	0.0872242	2260.52	1880.93	1513.99	1948.61	1579.04	1307.97	528.745	827.893	1160.07	1428.71	812.744	1076.18
ENSMUSG00000106252	Mir684-1	37.5868	3.2166	0.61141	2.7568	0.00583695	0.0872242	33.3321	43.7598	66.9578	82.5294	29.3604	21.8725	8.6883	10.2554	56.7575	44.3088	26.6473	26.5722
ENSMUSG00000025533	Asl	1883.45	1.48233	0.206112	2.75515	0.00586653	0.0875455	2695.86	2354.87	1946.43	2588.21	1412.05	1934.62	1752.55	1368.63	1846.69	1953.52	1186.83	1561.12
ENSMUSG00000027221	Chst1	10.3681	-43.0723	1.97157	-2.75348	0.00589651	0.0878718	0	0	0	0	8.2576	0	0	18.6462	12.459	5.90784	30.7469	48.3994
ENSMUSG00000024732	Ccdc86	758.869	1.37769	0.168042	2.75079	0.00594511	0.088353	1013.09	925.631	777.454	918.522	732.174	705.388	631.763	568.71	670.015	640.016	750.225	773.442
ENSMUSG00000031827	Cotl1	14556.9	1.40961	0.180049	2.75091	0.005943	0.088353	24339.5	18319	15805.8	18116.7	13767.3	14408.5	13614.6	12536.8	10550	13534.9	8576.34	11113.8
ENSMUSG00000024986	Hhex	901.929	1.74009	0.291198	2.74439	0.00606239	0.0897358	915.116	906.347	1387.51	1586.4	551.424	615.711	620.593	967.74	552.347	890.114	1142.76	687.082
ENSMUSG00000022131	Gpr180	690.614	-1.60583	0.249028	-2.74396	0.00607037	0.0897358	404.025	459.849	544.032	424.109	604.64	594.932	974.331	769.157	1144.84	688.263	684.632	994.561
ENSMUSG00000030711	Sult1a1	633.41	1.82153	0.315298	2.74391	0.00607129	0.0897358	1176.72	789.16	691.897	979.655	334.892	426.514	624.316	611.597	436.063	748.326	292.096	489.688
ENSMUSG00000047649	Cd3eap	482.426	1.71602	0.283915	2.744	0.00606956	0.0897358	946.428	436.115	512.413	727.481	416.55	474.633	347.532	289.017	454.06	466.719	330.017	388.144
ENSMUSG00000056515	Rab31	955.505	1.63721	0.259349	2.7424	0.0060992	0.0900255	1469.64	1544.2	919.739	966.664	862.461	758.975	542.398	827.893	650.634	1122.49	1021.82	779.136
ENSMUSG00000031292	Cdkl5	34.7835	-5.38297	0.886345	-2.73979	0.00614776	0.0906188	0	7.41692	12.0896	13.7549	39.453	34.996	38.4768	67.1265	16.6119	18.7081	126.062	42.7054
ENSMUSG00000028841	Cnksr1	7.19502	-97.2745	2.41199	-2.73798	0.00618181	0.0906276	0	0	0	0	10.0926	42.6514	0	8.39081	0	0	7.17428	18.0312
ENSMUSG00000039206	Daglb	803.381	1.43939	0.19186	2.73875	0.0061673	0.0906276	1343.38	930.823	1058.3	832.172	699.144	678.047	755.882	758.902	638.175	549.429	709.229	687.082
ENSMUSG00000068798	Rap1a	9437.64	-1.46194	0.200077	-2.73836	0.00617472	0.0906276	7910.81	6595.86	7310.49	7679.06	7893.35	10942.8	14442.4	9845.21	12838.3	9355.06	8729.05	9709.3
ENSMUSG00000098120	Gm5914	18.5868	-5.1386	0.862314	-2.73842	0.0061736	0.0906276	10.1006	4.45015	7.43975	6.87745	7.34009	19.6852	85.6418	35.4279	19.3806	10.831	9.22408	6.64306
ENSMUSG00000031633	Slc25a4	5448.31	1.50489	0.215664	2.73414	0.00625429	0.0915541	8535.03	6379.29	6499.55	7577.42	4190.27	5494.37	5453.77	4127.35	4623.66	5824.14	3096.22	3578.71
ENSMUSG00000037815	Ctnna1	4347.61	1.52207	0.221688	2.73374	0.00626192	0.0915541	5684.63	6199.8	4590.33	4682.02	4229.73	3639.58	2452.58	3576.35	3063.52	4075.42	5554.95	4422.38
ENSMUSG00000057554	Lgals8	14.5315	40.9773	1.96124	2.73131	0.00630836	0.0921088	0	17.8006	6.50978	6.87745	0	0	0	0	0	110.28	21.5229	11.3881
ENSMUSG00000021281	Tnfaip2	4795.84	1.52142	0.222041	2.7266	0.00639898	0.0930558	5223.03	7500.73	6592.55	4974.69	5145.4	3684.42	3153.85	3980.97	3185.34	5538.6	4537.22	4033.29
ENSMUSG00000018930	Ccl4	2124.94	2.00281	0.36748	2.72676	0.00639595	0.0930558	2246.38	1737.78	4110.46	5445.41	1067.07	1681.99	2016.93	1995.15	1316.5	1807.8	1437.93	635.836
ENSMUSG00000042682	Selenok	8568.12	-1.62382	0.256484	-2.72686	0.00639408	0.0930558	6792.67	5283.81	6313.56	7396.32	7446.52	12530.8	13459.4	8437.42	12955.9	8632.33	6098.14	7470.59
ENSMUSG00000054920	Klhl5	24.6643	5.55527	0.907907	2.72479	0.00643423	0.093443	90.9056	26.7009	44.6385	22.9248	12.8452	9.84262	0	10.2554	23.5336	13.785	34.8465	5.69405
ENSMUSG00000046865	Fbl	4035.82	1.45738	0.199775	2.71993	0.00652961	0.0945745	7385.57	4468.69	4560.57	5714.4	3559.94	4568.07	3460.43	3595	2770.04	3170.54	2252.73	2923.89
ENSMUSG00000107722	2900060B14Rik	90.0045	-3.06045	0.593272	-2.72007	0.00652681	0.0945745	24.2415	57.852	39.9887	40.5005	39.453	123.58	250.719	85.7727	177.194	124.065	63.5437	53.1445
ENSMUSG00000026840	Lamc3	7.47987	60.9146	2.18327	2.71552	0.00661726	0.0955885	37.3723	0	9.29969	0	0	0	0	0	12.459	18.7081	7.17428	4.74504
ENSMUSG00000031960	Aars	3782.3	-1.35479	0.161316	-2.7156	0.00661557	0.0955885	2870.6	2788.02	3389.74	2572.17	4121.46	4122.96	3740.93	3756.29	4265.12	3607.72	5410.43	4742.19
ENSMUSG00000055675	Kbtbd11	3272.68	-1.60337	0.250879	-2.71488	0.0066299	0.0956436	1319.14	2528.43	2671.8	1934.86	4414.15	2284.58	2971.4	3884.94	4078.23	3964.16	4741.18	4479.32
ENSMUSG00000016541	Atxn10	2773.87	1.30946	0.143416	2.7122	0.0066839	0.0962944	3901.87	2807.3	3118.19	3496.8	2402.04	2592.98	2586.63	2592.76	2501.48	2661.48	2209.68	2415.23
ENSMUSG00000025017	Pik3ap1	6154.38	1.75271	0.298758	2.70985	0.00673136	0.0967209	10089.5	10673.7	4796.78	4402.33	5969.33	4479.49	2795.15	3849.52	6151.96	6998.82	6846.32	6799.64
ENSMUSG00000029330	Cds1	105.37	2.50618	0.489108	2.71001	0.00672802	0.0967209	115.147	207.674	192.504	136.021	77.071	37.1832	75.7123	69.9234	34.6082	162.466	96.3404	59.7875
ENSMUSG00000028277	Ube2j1	173.533	-2.63403	0.516062	-2.70756	0.00677792	0.0972609	73.7345	84.5529	71.6076	143.662	205.523	227.474	300.367	251.724	222.877	31.5085	302.345	167.025
ENSMUSG00000029823	Luc7l2	339.911	-2.71108	0.532118	-2.70404	0.00685029	0.0980397	110.097	299.643	79.0474	77.1803	800.07	217.631	292.92	224.687	528.813	304.254	834.267	310.326
ENSMUSG00000025290	Rps24	23.9362	-5.91946	0.948608	-2.70445	0.00684169	0.0980397	10.1006	4.45015	12.0896	2.29248	36.7005	50.3067	75.7123	7.4585	30.4552	12.8003	42.0208	2.84703
ENSMUSG00000045917	Tmem268	4.82084	-92.0881	2.41391	-2.70306	0.00687053	0.0981996	0	0	0	0	25.6903	3.28087	14.8942	13.9847	0	0	0	0
ENSMUSG00000050103	Agmo	88.343	2.58087	0.506383	2.70124	0.00690825	0.0986086	227.264	127.571	111.596	87.8785	53.2157	74.3665	67.024	20.5109	59.5261	118.157	52.2698	60.7365
ENSMUSG00000025823	Pdia4	55.3199	-4.02781	0.744689	-2.69911	0.00695258	0.0989806	0	16.3172	22.3193	21.3965	40.3705	32.8087	106.742	63.3972	130.127	71.8787	102.49	55.9915
ENSMUSG00000022540	Rogdi	3287.4	1.46062	0.202502	2.69915	0.00695178	0.0989806	4276.6	3553.45	3592.47	5519.54	3403.05	3082.93	2210.55	2901.36	2527.78	2963.76	2286.55	3130.78
ENSMUSG00000003418	St8sia6	786.648	-1.96416	0.361138	-2.69678	0.00700131	0.0995436	445.437	358.237	238.072	258.286	475.271	509.629	665.275	902.478	1299.88	673.493	2420.81	1192.9
ENSMUSG00000040229	Gpr34	823.155	1.65924	0.271075	2.6949	0.00704091	0.0998446	1280.76	1022.05	1046.22	1192.09	731.257	719.605	556.051	729.068	632.638	1055.53	443.781	468.81
ENSMUSG00000001473	Tubb6	2881.32	1.77934	0.308467	2.69508	0.00703722	0.0998446	5901.79	4044.45	2794.56	3500.62	2872.73	3058.87	1401.3	1793.77	2007.28	3131.15	1499.43	2569.91
ENSMUSG00000025650	Col7a1	40.092	-4.75599	0.835045	-2.69416	0.00705663	0.0999367	3.03019	18.5423	21.3893	4.58497	100.009	24.0597	8.6883	93.2312	58.1418	40.3702	75.8424	33.2153
ENSMUSG00000069581	Tspear	9.46812	83.3601	2.3691	2.69355	0.00706957	0.0999892	0	11.1254	15.8095	36.6797	0	0	0	0	0	44.3088	0	5.69405
ENSMUSG00000055413	H2-Q5	997.217	-1.53531	0.229784	-2.69178	0.00710715	0.10039	707.044	943.432	725.376	781.737	1679.05	1125.34	1087.28	956.552	833.366	962.977	1291.37	873.088
ENSMUSG00000058594	Fbh1	5.55058	-55.672	2.15573	-2.68998	0.00714558	0.10067	0	0.741692	0	0	11.0101	10.9362	12.4119	23.3078	0	0	8.19918	0
ENSMUSG00000063522	Ly6m	90.6733	-5.79488	0.942294	-2.69001	0.00714497	0.10067	0	25.2175	15.8095	61.1329	42.2055	113.737	194.866	243.333	37.3769	12.8003	166.033	175.567
ENSMUSG00000030319	Cand2	137.911	-3.76106	0.711467	-2.6862	0.00722707	0.101686	0	61.5604	68.8177	36.6797	179.832	183.729	184.937	81.1111	269.944	265.853	189.606	132.861
ENSMUSG00000055691	Gja6	9.35088	-134.532	2.63445	-2.68436	0.00726682	0.102112	0	0	0	0	12.8452	37.1832	0	34.4955	27.6866	0	0	0
ENSMUSG00000029482	Aacs	701.201	1.38765	0.176141	2.68335	0.00728886	0.102289	881.784	881.13	757.925	766.454	629.413	675.86	513.851	549.132	566.19	743.403	693.856	755.411
ENSMUSG00000015745	Plekho1	3561.36	1.39713	0.179862	2.68244	0.00730883	0.102437	4090.75	3918.36	4272.28	6214.16	3189.27	3805.81	3456.7	2788.55	2900.17	2714.65	2730.33	2655.33
ENSMUSG00000026483	Fam129a	3700.24	1.60333	0.253953	2.68187	0.00732116	0.102477	5675.54	5070.2	3221.41	3221.7	3507.65	2501.12	1899.01	2810.92	3013.68	4019.3	4687.88	4774.46
ENSMUSG00000029762	Akr1b8	117.911	2.10298	0.400275	2.67924	0.00737897	0.102948	237.365	129.054	112.526	158.181	68.8134	69.992	57.0945	106.284	74.7537	158.527	94.2906	148.045
ENSMUSG00000054889	Dsp	6.93172	-60.7052	2.21114	-2.67904	0.00738327	0.102948	0	0.741692	0	0	9.17511	13.1235	28.5473	12.1201	0	0	19.4731	0
ENSMUSG00000034438	Gbp8	1482.49	1.56571	0.241386	2.67959	0.00737133	0.102948	2051.44	2540.29	1467.49	1808.01	1233.14	1050.97	1001.64	1737.83	1093.62	1267.23	1533.25	1005
ENSMUSG00000020877	Scrn2	338.291	-1.69533	0.284326	-2.6785	0.00739525	0.102982	325.24	194.323	279.921	222.371	314.706	396.986	549.845	469.885	386.228	359.393	342.316	218.272
ENSMUSG00000025613	Cct8	9318.55	1.28547	0.135326	2.67725	0.00742282	0.103233	12191.5	10196	11043.4	11327.2	8024.55	9182.07	9280.34	8332.07	6860.73	8422.61	7774.87	9187.35
ENSMUSG00000039682	Lap3	3935.13	1.45885	0.203616	2.67576	0.00745608	0.10343	6611.87	5962.46	3667.8	4455.82	3283.77	3833.15	3912.22	3159.61	3387.45	3484.64	2733.4	2729.35
ENSMUSG00000030062	Rpn1	11084.6	-1.44418	0.198147	-2.67605	0.0074496	0.10343	10114.8	8100.76	7572.74	7698.92	10286.2	10643.2	14639.8	12792.3	13329.7	8899.17	13919.1	15018.1
ENSMUSG00000029661	Col1a2	8.7176	42.3371	2.02071	2.67423	0.00749004	0.103769	0	22.2508	0	9.9341	0	0	0	0	31.8396	12.8003	16.3984	11.3881
ENSMUSG00000040511	Pvr	1396.49	1.46309	0.205436	2.67244	0.00753019	0.104192	2165.57	1698.47	1569.79	1218.84	1303.78	1075.03	1020.25	1145.81	1111.62	1509.45	1374.39	1564.91
ENSMUSG00000097527	1700112J16Rik	6.16917	-95.096	2.46034	-2.67089	0.00756495	0.104539	0	0	0	0	5.50507	10.9362	43.4415	0	0	4.9232	9.22408	0
ENSMUSG00000053063	Clec12a	5445.38	1.53524	0.231667	2.66963	0.0075936	0.104801	8333.01	7186.25	6528.38	7595.76	4985.76	5636.54	4503.02	4183.28	3867.81	6208.15	2665.76	3650.84
ENSMUSG00000006705	Pknox1	8.86289	-75.2887	2.33602	-2.6688	0.00761229	0.104926	0	0	0	0	21.1028	0	0	26.1047	0	13.785	10.249	35.1133
ENSMUSG00000027399	Il1a	572.89	2.04891	0.387992	2.66721	0.00764832	0.10526	941.378	1149.62	855.572	672.462	348.654	235.129	304.09	877.306	415.299	503.151	227.527	344.49
ENSMUSG00000028843	Sh3bgrl3	13683.5	1.49492	0.217508	2.66688	0.00765595	0.10526	22166.8	14808.6	14785.6	23022.6	10983.5	15319.5	12532.2	11190.5	10316	12456.7	7421.28	9198.74
ENSMUSG00000061778	Mospd2	295.242	1.77409	0.310366	2.66486	0.00770213	0.10576	215.143	322.636	392.447	374.439	268.831	129.048	182.454	154.764	377.922	283.576	472.478	369.164
ENSMUSG00000004460	Dnajb11	2208.59	-1.55453	0.239025	-2.66283	0.00774858	0.106263	1776.7	1694.02	1314.05	1781.26	1972.65	2562.36	2987.53	2685.99	3291.93	1474.01	2385.96	2576.56
ENSMUSG00000001270	Ckb	8175.55	1.35049	0.162828	2.66219	0.00776338	0.106332	9917.8	9283.01	9608.44	11636.6	8367.7	8227.34	6246.89	7106.08	5923.54	8402.91	6633.14	6753.14
ENSMUSG00000031862	Atp13a1	2860.42	-1.61212	0.258943	-2.66065	0.00779903	0.106685	1267.63	2467.61	2423.5	1686.5	4252.67	2405.97	3114.13	2875.25	4031.16	2563.02	4082.17	3155.45
ENSMUSG00000006373	Pgrmc1	2019.35	-1.51704	0.226645	-2.65288	0.00798092	0.108898	2034.27	1484.87	1314.05	1380.08	1774.47	2579.86	3126.55	1945.74	2631.61	2115.01	1901.19	1944.52
ENSMUSG00000031851	Ntpcr	244.995	1.88488	0.344667	2.6532	0.00797335	0.108898	583.816	226.216	314.33	320.948	138.544	176.074	219.69	232.146	245.026	143.757	187.556	151.841
ENSMUSG00000032562	Gnai2	21086.8	1.2596	0.125743	2.64799	0.00809713	0.110345	28131.2	22631.2	22992.6	22136.2	20928.4	19246.7	17720.4	18229.5	19110.7	21121.5	20254	20539.4
ENSMUSG00000015316	Slamf1	126.74	2.02514	0.384599	2.64697	0.00812175	0.110542	175.751	94.1949	168.324	138.313	59.6382	45.9322	85.6418	93.2312	110.746	236.313	148.61	164.178
ENSMUSG00000005683	Cs	7414.5	1.22145	0.109072	2.64588	0.0081478	0.110618	8380.49	7709.14	8209.77	7864.75	6399.64	7260.57	6266.75	6404.98	7165.28	7383.81	8122.31	7806.54
ENSMUSG00000018008	Cyth4	8754.44	1.47922	0.21345	2.64623	0.00813934	0.110618	11765.2	13484.7	8844.94	9854.62	9984.36	7953.93	5560.51	6211.06	6939.64	9364.91	7423.33	7666.09
ENSMUSG00000044937	Ttc41	7.4291	-124.16	2.63192	-2.64296	0.00821843	0.111437	0	0	0	0	0	21.8725	31.0296	25.1724	11.0746	0	0	0
ENSMUSG00000035960	Apex1	1386.69	1.63021	0.266831	2.64235	0.00823322	0.111498	2458.49	1894.28	1859.94	1720.13	1002.84	1794.64	1109.62	959.349	888.739	1407.05	708.204	837.025
ENSMUSG00000048264	Dip2c	205.114	1.96669	0.370105	2.63646	0.00837765	0.113313	318.17	358.237	195.294	120.737	137.627	114.831	120.395	131.456	179.963	243.206	340.266	201.19
ENSMUSG00000040606	Kazn	7.82862	109.617	2.57333	2.63329	0.00845618	0.114232	0	21.5091	31.619	30.5664	0	0	0	0	0	0	10.249	0
ENSMUSG00000028573	Fggy	5.71408	-64.951	2.28946	-2.63	0.00853857	0.115202	0	0	0	0	0	28.4342	4.96474	7.4585	20.7649	0	4.09959	2.84703
ENSMUSG00000047591	Mafa	23.3553	-13.1101	1.41393	-2.62573	0.00864637	0.116511	0	9.64199	0	0	49.5456	24.0597	9.92948	45.6833	117.668	11.8157	7.17428	4.74504
ENSMUSG00000032353	Tmed3	2983.06	-1.53017	0.233889	-2.62386	0.00869393	0.117006	2684.75	1998.12	2097.08	2352.85	2638.76	3693.17	4464.54	3179.18	4608.43	2682.16	2457.7	2940.03
ENSMUSG00000107456	Gm10400	5.16645	71.1934	2.34779	2.62105	0.00876594	0.117829	21.2113	9.64199	12.0896	11.4624	0	0	0	0	0	0	0	7.59207
ENSMUSG00000026616	Cr2	71.7196	2.52908	0.511314	2.61798	0.00884513	0.118746	81.815	96.4199	66.0278	22.9248	22.0203	27.3406	18.6178	37.2925	81.6754	149.665	136.311	120.524
ENSMUSG00000002346	Slc25a42	169.208	-2.35415	0.471988	-2.61703	0.00886995	0.118785	28.2817	94.1949	108.806	132.964	267.913	103.894	275.543	211.635	290.709	130.957	183.457	202.139
ENSMUSG00000031353	Rbbp7	6149.2	1.27887	0.135598	2.61708	0.00886858	0.118785	7081.55	6876.22	7001.74	8100.87	5174.76	6528.94	5508.38	5512.76	5209.23	6310.55	5277.2	5208.16
ENSMUSG00000021458	Aopep	172.297	-2.60252	0.527706	-2.61492	0.00892482	0.119269	79.7949	123.121	150.655	98.5768	236.718	267.938	551.086	122.133	119.052	27.5699	135.286	155.637
ENSMUSG00000026473	Glul	8980.24	1.75679	0.310978	2.61415	0.00894489	0.119269	21182	14307.2	8482.25	8490.59	7642.87	6268.66	6847.62	9102.16	5512.4	9719.38	4129.31	6078.4
ENSMUSG00000031165	Was	3229.09	1.36786	0.172888	2.61395	0.00895014	0.119269	5139.2	3250.09	3441.82	3609.13	2648.86	2783.27	2710.75	3142.82	2954.16	2750.1	2990.65	3328.17
ENSMUSG00000021967	Mrpl57	1902.53	-1.70502	0.294406	-2.61472	0.00892994	0.119269	1301.97	1267.55	1525.15	1418.28	1627.67	2948.41	3006.15	1818.94	3197.8	2013.59	1323.14	1381.76
ENSMUSG00000023913	Pla2g7	2393.68	1.88796	0.350995	2.61208	0.00899935	0.119778	6555.3	4051.86	2012.45	2701.31	1855.21	1558.41	2030.58	2670.14	1254.2	1984.05	741.001	1309.63
ENSMUSG00000026103	Gls	350.034	-1.68393	0.288075	-2.60986	0.0090578	0.120037	186.861	339.695	234.352	198.682	485.364	290.904	367.391	472.682	447.138	425.364	466.328	285.652
ENSMUSG00000005268	Prlr	254.804	-2.82421	0.573954	-2.60969	0.00906231	0.120037	109.087	51.9184	45.5685	26.7456	121.112	134.516	71.9888	329.106	638.175	191.02	1016.7	321.714
ENSMUSG00000042613	Pbxip1	3098.19	-1.3358	0.16006	-2.60966	0.00906317	0.120037	2223.15	2269.58	2847.57	2474.35	3655.37	2730.78	3639.16	3085.02	3603.41	3096.69	4000.18	3553.09
NA	NA	20.5733	-6.05255	0.995138	-2.61023	0.00904808	0.120037	0	11.8671	4.64985	9.16993	14.6802	80.9282	27.3061	34.4955	22.1493	3.93856	9.22408	28.4703
ENSMUSG00000067924	Rtl8b	322.709	1.76479	0.314158	2.60856	0.00909248	0.120278	431.297	438.34	452.895	613.621	270.666	226.38	251.961	347.752	130.127	335.762	215.229	158.484
ENSMUSG00000031207	Msn	13313.3	1.46933	0.213007	2.60631	0.00915231	0.120813	17529.6	17586.3	12032.9	11151.4	10844.1	8692.13	8294.84	11845	12618.2	13379.3	17781	18004.6
ENSMUSG00000097709	2810429I04Rik	8.2397	-79.1421	2.41975	-2.6062	0.00915517	0.120813	0	0	0	0	14.6802	25.1534	9.92948	0	8.30597	0	0	40.8074
ENSMUSG00000020952	Scfd1	227.46	-2.22751	0.443688	-2.60415	0.00921026	0.121392	74.7446	162.43	179.484	169.644	202.77	189.197	425.727	489.464	322.549	101.418	182.432	229.66
ENSMUSG00000021250	Fos	16794.3	-1.90902	0.358279	-2.60365	0.0092236	0.12142	7710.81	7514.08	15736	14853.8	14658.2	14398.7	38725	19681.1	18386.7	13566.4	25508.7	10792.1
ENSMUSG00000009614	Sardh	10.0955	67.8249	2.3373	2.60289	0.00924414	0.121542	25.2516	0	12.0896	14.5191	0	0	0	0	33.2239	0	0	36.0623
ENSMUSG00000004263	Atn1	1072.94	-1.8633	0.345371	-2.5997	0.00933055	0.12253	304.029	887.063	689.107	558.602	1863.47	752.414	1164.23	765.428	1132.38	1544.9	1786.4	1427.31
ENSMUSG00000020690	Efcab3	18.6662	-14.5399	1.48756	-2.59617	0.00942706	0.123647	0	3.70846	0	0	0	18.5916	6.20593	31.6986	67.8321	34.4624	10.249	51.2465
ENSMUSG00000030521	Mphosph10	1431.51	-1.33716	0.161593	-2.59402	0.0094862	0.124243	1298.94	1054.69	1168.04	1104.21	1336.81	1645.9	1694.22	1508.48	1926.99	1485.82	1509.67	1444.39
ENSMUSG00000029560	Snx8	1121.18	1.37476	0.177039	2.59368	0.00949543	0.124243	1659.53	1357.3	1249.88	1401.47	1174.41	1078.31	892.412	976.131	1053.47	943.285	737.926	930.028
ENSMUSG00000029082	Bst1	588.468	1.64495	0.276913	2.59303	0.00951337	0.124328	728.255	594.095	677.948	921.578	484.446	576.34	337.602	377.586	629.869	541.552	812.744	379.603
ENSMUSG00000025433	Crisp3	111.412	-3.36533	0.675336	-2.59241	0.00953056	0.124403	95.9559	18.5423	80.9073	16.8115	150.472	193.572	140.254	227.484	159.198	137.85	14.3486	101.544
ENSMUSG00000001175	Calm1	2748.26	1.52427	0.234617	2.59197	0.00954289	0.124414	4305.89	3632.06	2447.68	3001.63	1915.76	2652.04	2211.79	2003.54	3084.28	3510.24	1994.45	2219.73
ENSMUSG00000026020	Nop58	4018.15	1.33313	0.16021	2.58923	0.00961916	0.125257	5834.12	4574.01	4639.62	4323.62	3381.03	4369.03	3212.19	3567.03	3470.51	4070.5	3322.72	3453.44
ENSMUSG00000030630	Fah	189.655	-2.15475	0.427901	-2.58825	0.00964641	0.125461	192.922	57.1103	124.616	139.841	262.408	124.673	302.849	416.743	156.429	125.049	195.755	177.465
ENSMUSG00000020520	Galnt10	2022.95	1.4025	0.188767	2.58519	0.00973244	0.126428	2515.05	2176.87	2810.37	2165.63	1714.83	1977.27	1396.33	1803.09	1694.42	2029.34	1585.52	2406.69
ENSMUSG00000042828	Trim72	21.3617	-6.15981	1.01515	-2.58373	0.00977384	0.126658	0	11.1254	11.1596	0.764161	65.1433	8.749	39.7179	28.9017	13.8433	19.6928	29.722	27.5212
ENSMUSG00000020656	Grhl1	5.93405	52.1682	2.2087	2.58301	0.00979432	0.126658	17.1711	11.1254	9.29969	2.29248	0	0	0	0	17.9963	0	13.3237	0
ENSMUSG00000047419	Cmya5	48.1015	-4.89938	0.887344	-2.58366	0.00977573	0.126658	0	14.0921	25.1092	12.9907	68.8134	33.9024	135.289	18.6462	65.0634	80.7404	104.54	18.0312
ENSMUSG00000046031	Calhm6	697.093	1.77185	0.319507	2.58292	0.00979685	0.126658	1395.91	1127.37	658.418	833.7	565.187	650.707	495.233	554.726	688.011	710.91	406.884	278.059
ENSMUSG00000025232	Hexa	7282.58	1.41763	0.195139	2.58015	0.00987583	0.127526	12738.9	9660.53	7181.22	8207.86	7573.14	6935.77	5837.3	6308.02	6147.8	6522.25	4953.33	5324.89
ENSMUSG00000036275	9530068E07Rik	3068.82	1.26976	0.133583	2.57933	0.00989909	0.127675	3850.36	3597.2	3012.17	3011.56	2580.04	2621.42	2770.33	2637.51	3070.44	3088.81	3086.99	3498.99
ENSMUSG00000079017	Ifi27l2a	1258.52	1.50502	0.228726	2.57857	0.00992096	0.127805	1926.19	1812.69	1474.93	2145	1213.87	1099.09	1571.34	1006.9	906.735	775.896	491.951	677.592
ENSMUSG00000024300	Myo1f	4416.6	1.48904	0.22287	2.57721	0.00996026	0.128159	5362.42	6009.93	4688.9	5087.02	4264.59	2882.79	3227.08	3827.14	2976.31	3659.9	5752.75	5260.35
ENSMUSG00000051457	Spn	3000.42	-1.47788	0.218705	-2.57667	0.00997586	0.128207	2866.56	2220.63	2437.45	1627.66	3496.64	2637.82	3287.9	4100.31	3768.14	2522.65	3812.62	3226.63
ENSMUSG00000016481	Cr1l	62.1626	-2.69352	0.554927	-2.576	0.00999503	0.128301	11.1107	40.793	45.5685	16.8115	78.906	78.741	69.5064	81.1111	148.123	56.1244	58.4192	60.7365
ENSMUSG00000016356	Col20a1	134.149	-2.38856	0.48783	-2.57495	0.0100254	0.128538	52.5232	120.154	100.437	27.5098	155.059	113.737	222.172	227.484	224.261	84.679	152.71	129.065
ENSMUSG00000021886	Gpr65	5479.73	1.45864	0.211584	2.57403	0.0100522	0.128577	7159.32	5430.67	7586.69	8211.68	3434.25	4650.09	6259.3	5120.26	5055.57	4871.01	4429.61	3548.34
ENSMUSG00000031176	Dynlt3	2456.73	-1.41407	0.194165	-2.57435	0.0100428	0.128577	2608.99	1602.8	1734.39	1781.26	2231.39	2829.21	2976.36	2888.3	3218.56	2617.17	2531.5	2460.78
ENSMUSG00000025058	5430427O19Rik	898.731	-1.62929	0.273986	-2.57036	0.0101593	0.129795	658.561	507.317	726.306	877.257	800.07	1205.17	1417.43	1090.81	1277.74	610.476	760.474	853.159
ENSMUSG00000026305	Lrrfip1	4389	1.59147	0.260999	2.56846	0.0102153	0.13005	7939.09	6637.4	3404.62	3522.02	3988.42	3162.76	2796.39	3562.36	4043.62	4654.39	4320.97	4635.91
ENSMUSG00000000791	Il12rb1	228.9	-2.39771	0.491178	-2.56864	0.0102099	0.13005	31.3119	189.131	166.464	90.9352	174.327	241.691	464.203	267.574	191.037	320.992	395.611	213.527
ENSMUSG00000020846	Rflnb	412.859	2.02648	0.396686	2.56873	0.0102072	0.13005	732.295	559.236	334.789	495.941	228.46	348.866	251.961	218.161	312.858	375.148	224.453	872.139
ENSMUSG00000039483	Asb6	1071.22	-1.24913	0.125	-2.56741	0.0102461	0.130289	1126.22	967.166	1059.23	1069.06	1348.74	1404.21	1280.9	1238.11	855.515	833.005	837.341	835.127
ENSMUSG00000029234	Tmem165	1401.46	-1.37892	0.180686	-2.56542	0.010305	0.130885	1147.43	1072.49	1183.85	1022.45	1251.49	1920.4	1524.18	1407.79	1747.02	1267.23	1666.48	1606.67
ENSMUSG00000021270	Hsp90aa1	8938.58	1.38964	0.185267	2.5623	0.0103982	0.131913	11980.3	9284.5	10820.2	10221.4	6824.45	8485.43	7830.64	7303.73	6349.91	7487.2	10227.5	10447.6
ENSMUSG00000022043	Trim35	7430.63	1.49731	0.227531	2.55953	0.0104814	0.132814	9881.44	10266.5	7386.74	7482.67	8397.98	5483.43	3892.36	5610.65	6437.13	7583.69	8659.36	8085.55
ENSMUSG00000018167	Stard3	1067.74	1.42548	0.199998	2.55726	0.0105499	0.13337	1239.35	1127.37	1555.84	1389.25	1023.03	854.121	1001.64	847.472	755.843	1178.61	1053.59	786.728
ENSMUSG00000021149	Gtpbp4	3502.7	1.36045	0.173638	2.55755	0.0105412	0.13337	4601.84	4775.01	3283.72	3806.29	3065.41	3228.38	2550.64	3258.43	2926.47	3549.63	3101.34	3885.24
ENSMUSG00000011658	Fuz	664.069	-1.51053	0.232791	-2.55619	0.0105827	0.133628	507.051	499.9	554.262	619.735	826.678	761.163	973.089	734.662	884.586	534.659	444.806	628.244
ENSMUSG00000070697	Utp3	2050.64	1.29925	0.147798	2.55541	0.0106061	0.133768	2748.38	2198.37	2350.96	2708.95	1910.26	2232.09	1850.61	1708.93	1819.01	1637.46	1610.11	1832.54
ENSMUSG00000042129	Rassf4	2455.87	1.60734	0.268063	2.55415	0.0106448	0.1341	3235.23	2928.94	2042.21	2327.63	2089.17	1250.01	1395.09	1818.01	1976.82	2516.74	4389.64	3500.89
ENSMUSG00000038702	Dsel	114.965	-3.17527	0.652915	-2.55298	0.0106806	0.134368	124.238	45.9849	21.3893	18.3399	269.748	141.078	124.119	129.591	44.2985	64.0016	219.328	177.465
ENSMUSG00000028692	Akr1a1	19587.3	1.37682	0.180731	2.55264	0.0106909	0.134368	30660.4	22996.2	22012.4	27014.6	17299.7	22807.5	18812.6	15661	14354.1	17239.1	11752.5	14437.3
ENSMUSG00000021072	Tmx1	3143.75	1.27781	0.138702	2.54986	0.0107766	0.135288	3879.65	3462.96	4046.3	3163.63	2518.57	2888.26	3176.19	2806.26	3021.99	2953.92	2708.8	3098.51
ENSMUSG00000062488	Ifit3b	85.2457	5.98565	1.01277	2.54895	0.0108047	0.135475	383.824	109.029	66.0278	84.0577	8.2576	25.1534	0	73.6527	6.92164	176.25	46.1204	43.6544
ENSMUSG00000045680	Tcf21	30.4461	5.97527	1.01194	2.54857	0.0108165	0.135475	108.077	27.4426	67.8877	86.3502	20.1853	19.6852	0	8.39081	0	14.7696	3.07469	9.49008
ENSMUSG00000024431	Nr3c1	6.79146	50.5195	2.22349	2.54499	0.0109279	0.136535	21.2113	1.48338	3.71988	12.2266	0	0	0	0	0	0	27.6722	15.1841
ENSMUSG00000030560	Ctsc	7035.68	1.66902	0.290507	2.54384	0.0109642	0.136535	15655	10540.9	6334.02	6953.87	6354.68	5307.36	5313.52	6680.02	4937.9	7982.47	3911.01	4457.49
ENSMUSG00000004771	Rab11a	4555.02	1.39064	0.186963	2.54463	0.0109393	0.136535	6102.8	5382.46	4966.97	6666.54	3763.63	5440.78	3881.19	3539.99	4060.24	4042.93	2970.15	3842.53
ENSMUSG00000055748	Gsdmc4	5.24156	56.1141	2.28381	2.54413	0.0109551	0.136535	27.2717	9.64199	3.71988	2.29248	0	0	0	0	15.2276	0	0	4.74504
NA	NA	45.0742	3.25335	0.668931	2.54425	0.0109513	0.136535	76.7647	107.545	59.518	75.652	22.0203	6.56175	19.859	49.4125	42.9142	41.3549	30.7469	8.54108
ENSMUSG00000021248	Tmed10	8812.97	-1.46294	0.215924	-2.54198	0.0110228	0.137015	7748.19	6581.03	5440.32	5888.63	7715.35	9038.81	11230.2	9552.47	14932.8	7789.48	10513.4	9324.96
ENSMUSG00000025224	Gbf1	1988.64	-1.86334	0.35325	-2.54181	0.0110279	0.137015	566.645	1591.67	1077.83	784.794	2749.78	1075.03	1534.11	2134.06	3033.06	1888.54	4463.43	2964.7
ENSMUSG00000040412	5330417C22Rik	5.03497	68.7725	2.40436	2.53862	0.011129	0.13808	21.2113	18.5423	7.43975	5.34913	0	0	0	0	0	7.87712	0	0
ENSMUSG00000013707	Tnfaip8l2	1140.97	1.44092	0.207614	2.5383	0.0111392	0.13808	1378.73	1526.4	1261.04	1694.15	1097.34	1221.58	708.717	1038.6	1006.41	1101.81	806.594	850.311
ENSMUSG00000020385	Clk4	8.85993	-73.4665	2.44299	-2.53747	0.0111656	0.138249	0	0	0	0	6.42258	0	17.3766	22.3755	4.15299	0	0	55.9915
ENSMUSG00000023952	Gtpbp2	75.7059	-2.47722	0.516027	-2.53615	0.0112078	0.138613	13.1308	42.2764	43.7085	45.0855	166.07	71.0856	49.6474	70.8557	91.3657	117.172	111.714	86.3598
ENSMUSG00000041961	Znrf3	38.1906	-9.58244	1.28678	-2.53376	0.0112845	0.139403	22.2214	0	0	0	51.3806	8.749	79.4359	69.9234	33.2239	21.6621	127.087	44.6034
ENSMUSG00000047347	Tdg-ps	12.7407	7.16622	1.12154	2.53332	0.0112988	0.13942	13.1308	15.5755	21.3893	9.9341	0.917511	6.56175	0	0.932312	30.4552	10.831	6.14939	37.0113
ENSMUSG00000032526	Ss18l2	401.074	-1.8899	0.362585	-2.53267	0.0113197	0.13952	310.089	138.696	312.47	288.089	391.777	618.991	624.316	347.752	718.466	414.533	275.697	372.011
ENSMUSG00000029059	Prxl2b	1942.76	1.73698	0.314674	2.53145	0.0113592	0.139848	4259.43	3361.35	2168.69	2348.27	1523.99	1804.48	1930.04	1729.44	1047.94	1640.41	481.702	1017.34
ENSMUSG00000035373	Ccl7	24.4703	8.26118	1.20393	2.53034	0.0113952	0.140132	66.6641	8.9003	53.9382	32.8589	8.2576	7.65537	3.72356	0	0	29.5392	70.7179	11.3881
ENSMUSG00000085589	A430078I02Rik	5.08032	79.7232	2.49742	2.52938	0.0114264	0.140356	45.4528	8.9003	2.78991	3.82081	0	0	0	0	0	0	0	0
ENSMUSG00000094447	9430069I07Rik	60.8838	-8.87154	1.24546	-2.52852	0.0114544	0.140381	0	0	15.8095	24.4532	125.699	87.49	75.7123	68.9911	67.8321	0	100.44	164.178
ENSMUSG00000031375	Bgn	32.9391	8.24209	1.20338	2.52871	0.0114482	0.140381	120.197	37.8263	106.016	32.8589	22.0203	4.3745	0	9.32312	0	24.616	1.0249	37.0113
ENSMUSG00000004937	Sgta	6.9034	73.6926	2.45666	2.52516	0.0115647	0.141572	0	14.8338	35.3388	6.11329	0	0	0	0	19.3806	0	7.17428	0
ENSMUSG00000027115	Kif18a	305.17	-1.71933	0.309877	-2.52307	0.0116334	0.14204	158.58	142.405	292.94	195.625	295.439	391.518	258.167	411.15	326.702	351.516	525.773	312.224
ENSMUSG00000020868	Xylt2	483.118	-1.62245	0.276746	-2.52281	0.0116422	0.14204	274.737	247.725	473.354	463.846	480.776	531.502	743.47	613.461	447.138	457.857	624.163	439.391
ENSMUSG00000034274	Thoc5	1194.27	1.37581	0.182399	2.52351	0.011619	0.14204	1846.39	1251.98	1341.95	1420.58	1123.95	1205.17	1053.77	876.373	1043.78	920.638	1120.21	1126.47
ENSMUSG00000037922	Bank1	98.4632	2.49662	0.523478	2.52155	0.011684	0.14207	273.727	149.08	93.9269	73.3595	72.4834	59.0557	32.2708	71.788	51.2202	121.111	56.3694	127.167
ENSMUSG00000001918	Slc1a5	5398.04	-1.48171	0.224962	-2.52161	0.0116819	0.14207	2831.2	4178.69	5252.47	5616.58	8149.34	5521.71	6858.79	5963.07	5347.66	4071.48	5584.67	5400.81
ENSMUSG00000001518	Itfg2	648.526	-1.41832	0.19993	-2.52178	0.0116764	0.14207	454.528	556.269	559.841	570.828	732.174	628.834	863.865	813.908	726.772	484.443	712.304	678.541
ENSMUSG00000040026	Saa3	40.3047	-12.7909	1.45885	-2.52051	0.0117186	0.142331	0	0	21.3893	12.2266	232.13	5.46812	146.46	45.6833	11.0746	0	9.22408	0
ENSMUSG00000101013	A630072M18Rik	390.381	-1.7459	0.319237	-2.51842	0.0117883	0.143017	224.234	337.47	258.531	271.277	523.899	587.276	424.485	371.06	455.444	203.82	605.715	421.36
ENSMUSG00000020496	Rnf187	6413.14	-1.35766	0.175191	-2.51792	0.011805	0.14306	4285.69	4540.64	6302.4	6195.05	7210.72	8437.31	7131.85	6171.91	7478.14	6356.83	6221.13	6625.98
ENSMUSG00000039087	Rreb1	8.46338	69.9398	2.43439	2.51728	0.0118266	0.143161	39.3924	14.0921	0	0	0	0	0	0	22.1493	0	4.09959	21.8272
ENSMUSG00000052353	Cemip	5.57915	48.4338	2.22501	2.51592	0.0118722	0.143545	2.02012	13.3505	13.9495	7.64161	0	0	0	0	0	0	20.498	9.49008
ENSMUSG00000024036	Slc37a1	6.7377	77.9778	2.49846	2.51555	0.0118848	0.143545	0	25.9592	3.71988	29.8023	0	0	0	0	0	0	19.4731	1.89802
ENSMUSG00000085912	Trp53cor1	16.2885	-15.1379	1.55957	-2.51357	0.0119515	0.14419	0	0	0	6.11329	23.8553	0	64.5416	6.52618	23.5336	23.6313	10.249	37.0113
NA	NA	14.6144	-19.3411	1.70093	-2.5125	0.0119879	0.144308	0	6.67523	0	0	27.5253	28.4342	21.1002	55.0064	0	0	20.498	16.1331
ENSMUSG00000045411	2410002F23Rik	1031.22	-1.37359	0.182253	-2.51274	0.0119797	0.144308	710.074	888.547	930.899	1051.49	1422.14	1040.04	1314.42	1143.95	847.209	1045.69	1019.77	960.396
ENSMUSG00000024697	Gna14	48.8181	-7.0712	1.12367	-2.51136	0.0120266	0.144613	0	0	30.689	3.05664	74.3184	104.988	31.0296	27.037	168.888	77.7865	21.5229	46.5014
ENSMUSG00000029580	Actb	198057	1.29309	0.147729	2.51015	0.012068	0.144789	259501	226851	182235	262785	197188	171024	168364	183691	167832	181772	177187	198253
ENSMUSG00000053460	Ggcx	307.995	-2.13401	0.4356	-2.51048	0.0120567	0.144789	194.942	232.891	124.616	135.257	403.705	248.253	412.074	403.691	326.702	109.295	626.212	478.3
ENSMUSG00000030788	Rnf141	432.106	1.4662	0.220021	2.50924	0.0120992	0.145003	408.065	594.095	544.962	477.601	309.201	310.589	379.803	382.248	386.228	369.24	541.146	482.096
ENSMUSG00000037797	Adh4	6.85515	-108.908	2.69725	-2.50884	0.0121128	0.145005	0	0	0	0	16.5152	29.5279	0	22.3755	13.8433	0	0	0
ENSMUSG00000031557	Plekha2	4306.68	-1.38888	0.188979	-2.50781	0.0121482	0.145269	4009.95	3173.7	2822.46	2513.33	4791.24	3782.85	4443.44	4367.88	6452.36	4245.77	5580.57	5496.66
ENSMUSG00000008090	Fgfrl1	10.0088	-18.9813	1.69393	-2.50689	0.0121799	0.145474	0	0	1.85994	2.29248	9.17511	15.3107	37.2356	17.7139	0	0	6.14939	30.3683
ENSMUSG00000022941	Ripply3	69.152	-2.75749	0.583817	-2.50653	0.0121922	0.145474	62.6239	34.1178	31.619	21.3965	33.9479	121.392	129.083	127.727	117.668	30.5238	53.2947	66.4306
ENSMUSG00000024421	Lama3	7.02926	41.2595	2.14168	2.50582	0.0122169	0.145609	5.05031	11.8671	0	14.5191	0	0	0	0	22.1493	24.616	6.14939	0
ENSMUSG00000029761	Cald1	8.12185	105.623	2.68699	2.50197	0.0123503	0.146055	57.5735	17.8006	0	5.34913	0	0	0	0	0	16.7389	0	0
ENSMUSG00000026070	Il18r1	510.731	-1.66295	0.293095	-2.50344	0.0122991	0.146055	327.26	470.233	304.1	349.222	739.514	552.28	496.474	624.649	286.556	700.079	680.532	597.875
ENSMUSG00000026478	Lamc1	891.661	-2.2153	0.45848	-2.50283	0.0123204	0.146055	541.393	507.317	212.033	110.039	940.449	447.292	1004.12	644.228	2271.68	663.647	1834.57	1523.16
ENSMUSG00000027962	Vcam1	20357.9	1.96058	0.388258	2.50163	0.0123622	0.146055	54140.3	39183.6	15782.5	16717.6	15877.5	10777.7	13002.7	24517.9	12301.1	22013.6	8822.32	11157.5
ENSMUSG00000109901	Chmp1b	2169.97	1.32885	0.163923	2.50223	0.0123414	0.146055	2757.47	2406.05	2415.13	2982.52	1590.05	2104.13	2268.89	1986.76	1961.59	1715.24	2124.61	1727.2
ENSMUSG00000056888	Glipr1	7455.05	-1.37244	0.182497	-2.50273	0.0123238	0.146055	6817.92	5911.28	6265.2	7506.36	7217.14	9984.79	11526.9	7644.96	6950.71	6515.36	5663.58	7456.36
ENSMUSG00000015224	Cyp2j9	7.46137	-72.7231	2.47165	-2.50211	0.0123457	0.146055	0	0	0	0	6.42258	13.1235	0	26.1047	38.7612	0	5.12449	0
ENSMUSG00000032915	Adgre4	3005.71	1.86106	0.358104	2.50241	0.0123353	0.146055	7454.26	5211.87	2385.37	2570.64	2547.93	1873.38	1815.85	3230.46	2277.22	3366.48	1463.55	1871.44
ENSMUSG00000014867	Surf4	10758.4	-1.32804	0.163735	-2.49979	0.0124268	0.146658	9984.46	8697.82	7301.19	8441.69	11037.7	11702.9	11942.7	11034.8	13868.2	9178.81	13543	12367.5
ENSMUSG00000031097	Tnni2	1169.1	1.6212	0.278906	2.49926	0.0124453	0.146716	1538.32	1231.95	1338.23	2491.17	908.336	1112.22	1166.71	884.764	1133.77	990.547	583.167	650.071
ENSMUSG00000073402	Gm8909	27.2131	-3.4642	0.717794	-2.49727	0.0125155	0.146725	5.05031	8.9003	9.29969	6.87745	10.0926	51.4004	12.4119	30.7663	51.2202	27.5699	64.5686	48.3994
ENSMUSG00000028826	Maco1	6.82647	70.4723	2.45766	2.49789	0.0124933	0.146725	0	14.8338	34.4089	4.58497	0	0	0	0	0	0	20.498	7.59207
ENSMUSG00000007739	Cct4	7581.56	1.28208	0.14357	2.49693	0.0125273	0.146725	8045.14	8062.93	9149.04	10816.7	6195.95	7695.84	7089.65	7157.36	6109.04	6983.06	6713.08	6960.98
ENSMUSG00000062380	Tubb3	50.8379	2.90125	0.615023	2.49857	0.0124696	0.146725	40.4025	80.1027	70.6777	118.445	6.42258	33.9024	49.6474	17.7139	41.5299	41.3549	48.1702	61.6855
ENSMUSG00000034135	Sik3	1063.85	-1.60945	0.274801	-2.49842	0.0124747	0.146725	590.886	950.849	596.11	651.829	1528.57	902.24	981.778	1077.75	1286.04	840.882	1817.14	1542.14
ENSMUSG00000103897	Pcdhga8	13.2244	-83.3628	2.5553	-2.49729	0.0125147	0.146725	0	0	0	0	52.2981	0	0	0	55.3731	30.5238	20.498	0
ENSMUSG00000044937	Ttc41	62.3876	-4.73291	0.899454	-2.49343	0.0126514	0.146976	0	40.0514	24.1792	6.87745	139.462	37.1832	54.6122	106.284	135.664	15.7542	111.714	76.8697
ENSMUSG00000073792	Alg6	258.171	-1.79277	0.337781	-2.49329	0.0126564	0.146976	241.405	114.962	208.313	136.785	221.12	326.994	317.743	389.706	229.799	421.426	219.328	270.467
ENSMUSG00000031516	Dctn6	9.15447	-55.9099	2.32668	-2.49498	0.0125963	0.146976	0	0	0	0	16.5152	18.5916	0	0	38.7612	0	24.5975	11.3881
ENSMUSG00000022261	Sdc2	142.013	-2.57622	0.547577	-2.49327	0.0126572	0.146976	35.3522	48.21	60.448	87.1144	152.307	56.8685	83.1594	303.001	228.414	347.578	203.955	97.7479
ENSMUSG00000047945	Marcksl1	4265.53	1.59253	0.269165	2.4941	0.0126278	0.146976	7749.2	4421.22	4921.4	7113.58	3955.39	4585.57	2627.59	4029.45	2223.23	2635.88	2458.73	4465.08
ENSMUSG00000027995	Tlr2	1265.93	1.7508	0.323857	2.49496	0.0125971	0.146976	2763.53	1922.47	1073.18	1071.35	1327.64	761.163	678.928	1131.83	996.717	1364.71	1197.08	902.507
ENSMUSG00000036273	Lrrk2	2278.1	1.75742	0.326215	2.49363	0.0126446	0.146976	1671.65	3567.54	2169.62	1934.09	2175.42	1251.11	884.965	1004.1	2282.76	2617.17	4661.23	3117.49
NA	NA	21.4108	-13.0235	1.48439	-2.49467	0.0126076	0.146976	0	13.3505	0	0	57.8032	21.8725	40.9591	55.9387	35.9925	0	21.5229	9.49008
ENSMUSG00000098923	Tmem185b	823.697	1.48587	0.229237	2.4922	0.0126954	0.147261	1142.38	1059.88	916.95	1067.53	786.307	736.009	702.511	592.95	498.358	1030.92	642.611	707.96
ENSMUSG00000030291	Med21	1372.37	1.51459	0.24054	2.48993	0.0127767	0.147729	2033.26	1507.86	1808.79	2048.72	1082.66	1566.07	1103.41	1132.76	1036.86	1513.39	723.578	911.048
ENSMUSG00000030126	Tmcc1	193.367	-1.82368	0.348115	-2.49014	0.0127693	0.147729	93.9358	89.7447	87.4171	218.55	198.182	223.099	274.302	199.515	246.41	256.006	198.83	234.405
ENSMUSG00000078485	Plekhn1	636.146	-1.58892	0.268227	-2.49059	0.0127531	0.147729	269.687	552.56	695.617	431.751	912.006	681.328	780.706	724.406	563.422	692.202	647.735	682.337
ENSMUSG00000032718	Mansc1	108.316	-2.55258	0.543772	-2.48626	0.0129094	0.149105	12.1207	90.4864	58.5881	55.0196	104.596	80.9282	160.113	207.906	181.347	83.6944	105.564	159.433
ENSMUSG00000004359	Spic	4087.53	1.76715	0.330453	2.48575	0.0129279	0.14916	8806.73	7036.43	3986.78	4700.36	3566.37	2700.16	3344.99	4269.06	2656.53	4593.34	1483.03	1906.56
ENSMUSG00000039187	Fanci	229.143	2.08755	0.427251	2.48522	0.0129471	0.149223	142.419	335.986	510.553	244.532	140.379	216.538	96.8125	137.05	130.127	277.668	313.619	204.037
ENSMUSG00000062116	Zfp954	528.929	-1.52157	0.243807	-2.48379	0.0129993	0.149664	582.806	386.421	382.217	356.863	536.744	609.149	767.053	685.249	481.746	550.413	380.237	628.244
ENSMUSG00000045114	Prrt2	23.2913	-7.98013	1.20715	-2.48223	0.0130565	0.14977	0	0	15.8095	7.64161	70.6484	26.247	76.9535	13.0524	19.3806	33.4777	2.0498	14.2351
ENSMUSG00000041115	Iqsec2	9.55008	-55.2335	2.33175	-2.48203	0.0130637	0.14977	0	0	0	0	28.4429	0	6.20593	0	33.2239	0	28.6971	18.0312
ENSMUSG00000038991	Txndc5	24.8499	-8.05166	1.21221	-2.48247	0.0130474	0.14977	0	0	8.36972	0	21.1028	5.46812	27.3061	12.1201	110.746	63.0169	22.5477	27.5212
ENSMUSG00000056666	Retsat	305.54	-1.81134	0.345295	-2.48211	0.0130607	0.14977	292.918	222.508	114.386	184.927	284.429	304.028	556.051	331.903	289.325	480.504	295.171	310.326
ENSMUSG00000036611	Eepd1	216.186	1.99142	0.400809	2.47947	0.0131577	0.150688	318.17	407.189	224.123	282.74	231.213	155.295	122.877	109.081	317.011	170.343	166.033	90.1558
ENSMUSG00000051537	Gm5124	29.2646	-9.5987	1.31698	-2.47752	0.01323	0.151355	0	22.9924	0	0	24.7728	57.9621	74.4711	66.1942	8.30597	6.89248	56.3694	33.2153
ENSMUSG00000039168	Dap	2479.65	-1.29298	0.149783	-2.4749	0.0133273	0.152308	1933.26	2047.81	2282.14	2549.24	2642.43	3180.26	3052.08	2522.84	2577.62	2318.83	2192.26	2456.98
ENSMUSG00000095440	Fignl2	5.35553	26.8602	1.91996	2.47266	0.0134112	0.152523	4.04025	21.5091	7.43975	0.764161	0	0	0	0.932312	0	11.8157	9.22408	8.54108
ENSMUSG00000026727	Rsu1	2710.18	1.41668	0.20324	2.47252	0.0134165	0.152523	4210.95	3247.13	2956.37	3808.58	2222.21	3105.89	2412.86	2299.08	2162.32	2615.2	1545.55	1935.98
ENSMUSG00000039304	Tnfsf10	311.996	-1.89604	0.373193	-2.47321	0.0133904	0.152523	90.9056	168.364	245.512	119.973	267.913	277.781	382.285	257.318	516.355	250.098	707.179	460.269
ENSMUSG00000020671	Rab10	5895.33	1.30758	0.156395	2.47385	0.0133666	0.152523	7668.39	6801.31	5661.65	6615.34	4985.76	5328.14	4843.11	5297.4	4820.23	5406.66	6619.81	6696.2
ENSMUSG00000049489	Ccnq	398.954	-1.78013	0.33642	-2.47305	0.0133966	0.152523	374.733	194.323	210.173	466.902	367.922	539.157	708.717	603.206	386.228	388.933	314.644	232.507
ENSMUSG00000039908	Slc26a11	372.593	1.51035	0.240641	2.47208	0.0134331	0.152552	447.458	495.45	547.752	430.987	418.385	228.568	321.467	303.001	350.235	335.762	344.366	247.691
ENSMUSG00000036908	Unc93b1	1806.86	1.35084	0.175714	2.46908	0.013546	0.153673	2844.33	2132.36	1912.02	1971.54	1702.9	1539.82	1738.9	1576.54	1607.21	1834.38	1473.8	1348.54
ENSMUSG00000024459	H2-M5	33.1071	4.80208	0.917255	2.46786	0.0135922	0.154036	39.3924	69.719	53.0082	55.7838	31.1954	4.3745	0	9.32312	31.8396	29.5392	64.5686	8.54108
ENSMUSG00000031490	Eif4ebp1	1367.78	-1.59386	0.27306	-2.46291	0.0137813	0.156016	972.69	867.038	1391.23	1217.31	1399.2	2665.16	1851.85	1174.71	1248.66	1542.93	940.856	1141.66
ENSMUSG00000021484	Lman2	9447.81	-1.32518	0.165014	-2.46152	0.013835	0.156459	9388.53	7087.61	7018.48	7447.51	8812.7	10349	11966.3	9875.98	10608.1	8482.67	10677.4	11659.5
ENSMUSG00000005973	Rcn1	778.547	-1.59841	0.274984	-2.46064	0.0138691	0.156587	798.959	499.9	554.262	633.49	946.872	783.035	1076.11	1167.25	449.907	621.307	1074.09	737.379
ENSMUSG00000049969	Plekhf2	994.006	1.37949	0.188636	2.46048	0.0138752	0.156587	1043.39	1284.61	1374.49	877.257	820.255	839.904	820.424	839.081	1027.17	822.174	1145.84	1033.47
ENSMUSG00000102037	Bcl2a1a	1560.64	1.65606	0.296056	2.45816	0.013965	0.156784	2501.92	1858.68	1895.28	2929.79	1313.88	1716.99	1397.57	1118.77	1153.15	1481.88	497.075	862.649
ENSMUSG00000056820	Tsnax	2351.17	1.22949	0.121238	2.45848	0.0139528	0.156784	2562.53	2661.93	2576.94	2671.51	2174.5	1916.03	2308.61	2120.08	2237.07	2151.44	2283.47	2549.99
ENSMUSG00000004698	Hdac9	383.741	-1.74729	0.327476	-2.45857	0.0139493	0.156784	217.163	347.112	230.632	213.201	521.146	395.892	297.885	546.335	484.515	276.684	692.831	381.501
ENSMUSG00000079614	Seh1l	21.7616	9.07448	1.29411	2.45868	0.0139448	0.156784	0	25.2175	21.3893	56.5479	3.67005	0	0	7.4585	24.9179	60.063	15.3735	46.5014
ENSMUSG00000097048	1600020E01Rik	15.0457	-19.7646	1.75072	-2.45891	0.0139361	0.156784	0	0	0	6.11329	0	34.996	35.9944	52.2095	0	20.6774	15.3735	15.1841
ENSMUSG00000023495	Pcbp4	212.617	-1.98641	0.402944	-2.45732	0.0139979	0.156991	169.69	60.8187	124.616	230.013	264.243	223.099	420.762	254.521	271.328	144.742	184.482	203.088
ENSMUSG00000022853	Ehhadh	254.033	-1.74472	0.326855	-2.45674	0.0140204	0.157081	169.69	143.888	166.464	192.569	266.078	152.014	328.914	426.067	371	318.039	221.378	292.295
ENSMUSG00000054626	Xlr	6.77746	66.3857	2.46469	2.4558	0.014057	0.157328	24.2415	8.9003	0	17.5757	0	0	0	0	24.9179	0	0	5.69405
ENSMUSG00000097061	9330151L19Rik	175.942	-2.24048	0.474069	-2.45494	0.0140908	0.157543	45.4528	63.7855	186.924	170.408	398.2	269.032	162.595	215.364	188.269	152.619	160.909	97.7479
ENSMUSG00000015337	Endog	251.941	-1.69515	0.310326	-2.4536	0.0141434	0.157968	197.972	221.024	212.033	230.013	293.604	505.255	436.897	225.62	177.194	117.172	196.78	209.731
ENSMUSG00000021993	Mipep	6.25783	-78.6759	2.56781	-2.45262	0.0141821	0.158238	0	0	0	0	5.50507	13.1235	0	30.7663	0	0	1.0249	24.6742
ENSMUSG00000032312	Csk	30.3543	-8.34702	1.2498	-2.4494	0.0143096	0.159496	0	0	16.7394	1.52832	35.7829	7.65537	81.9182	26.1047	98.2873	45.2934	47.1453	3.79603
ENSMUSG00000001127	Araf	1417.69	-1.38871	0.193517	-2.44808	0.0143622	0.159753	929.257	1149.62	1319.63	1301.37	1683.63	1699.49	1450.95	1693.08	1850.85	1116.58	1400.01	1417.82
ENSMUSG00000069806	Cacng7	8.8671	27.2273	1.94695	2.44843	0.014348	0.159753	0	0	9.29969	11.4624	0	0	0	0	16.6119	23.6313	23.5726	21.8272
ENSMUSG00000087385	Frg2f1	63.7094	-2.18746	0.461393	-2.44749	0.0143856	0.15985	37.3723	57.852	31.619	32.8589	66.0608	113.737	57.0945	112.81	37.3769	66.9555	88.1412	62.6346
ENSMUSG00000000290	Itgb2	1459.56	1.29561	0.152748	2.44609	0.0144415	0.160306	1801.95	1868.32	1392.16	1624.61	1434.07	1371.41	1228.77	1127.17	1463.24	1375.54	1453.3	1374.16
ENSMUSG00000030055	Rab43	1015.8	1.43201	0.21223	2.44094	0.0146491	0.1619	1246.42	997.575	1234.07	1177.57	1058.81	791.784	678.928	719.745	1074.24	812.328	1345.69	1052.45
ENSMUSG00000020349	Ppp2ca	11002.4	1.29846	0.15437	2.44087	0.0146521	0.1619	15460	12853.5	11301.9	12054.6	9505.42	11908.5	9681.25	8698.47	10478	10733.6	9045.75	10308.1
ENSMUSG00000025790	Slco3a1	471.59	1.84723	0.362574	2.44187	0.0146113	0.1619	766.637	892.997	674.228	301.844	542.249	227.474	279.267	376.654	268.56	397.794	454.03	477.351
ENSMUSG00000026922	Agpat2	243.515	-1.59717	0.276775	-2.44068	0.0146597	0.1619	171.711	189.873	207.383	194.097	191.76	314.964	430.691	283.423	232.567	240.252	262.374	203.088
ENSMUSG00000031494	Cd209a	349.898	2.13631	0.44859	2.44126	0.0146363	0.1619	1126.22	249.208	423.136	480.657	350.489	393.705	131.566	190.192	218.724	274.714	173.208	186.955
ENSMUSG00000027514	Zbp1	494.212	-1.52886	0.251018	-2.43987	0.0146924	0.16193	379.783	390.13	348.738	357.627	478.023	482.288	727.335	570.575	513.586	351.516	697.955	632.989
ENSMUSG00000004394	Tmed4	1633.61	-1.3317	0.169361	-2.44018	0.0146799	0.16193	1514.08	1289.8	1308.47	1467.19	1492.79	1978.37	2124.91	1835.72	1857.77	1817.64	1426.66	1489.94
ENSMUSG00000052631	Sh2d6	8.35359	-99.0827	2.71802	-2.43949	0.0147082	0.161939	0	0	0	0	16.5152	0	0	45.6833	0	28.5545	0	9.49008
ENSMUSG00000020010	Vnn3	259.188	1.72196	0.321565	2.43824	0.014759	0.162334	489.88	446.498	234.352	303.372	245.893	193.572	199.831	216.296	119.052	265.853	203.955	191.7
ENSMUSG00000021501	Caml	698.238	-1.44881	0.219492	-2.43683	0.0148167	0.162702	532.303	638.597	494.744	681.632	596.382	910.989	1086.04	811.111	746.153	615.4	608.789	656.714
ENSMUSG00000026234	Ncl	17845.5	1.26211	0.137826	2.43669	0.0148225	0.162702	23852.6	20855.6	18005.1	16995.7	15843.6	16456.9	14504.5	16348.1	17821.8	18631.3	17989	16841.1
ENSMUSG00000028211	Trp53inp1	24.0736	-19.3626	1.75547	-2.43536	0.0148771	0.163136	0	5.93353	0	0	0	14.2171	83.1594	20.5109	27.6866	0	99.4151	37.9603
ENSMUSG00000002326	Gmpr2	1626.89	1.36873	0.185992	2.43474	0.0149025	0.16325	2446.37	1941.01	1768.8	2365.08	1399.2	1549.67	1721.52	1556.03	1165.6	1514.38	969.553	1125.52
ENSMUSG00000049775	Tmsb4x	343720	1.49846	0.239705	2.43414	0.014927	0.163353	515633	413147	405246	550029	271558	412316	310430	263026	275566	340784	158023	208886
ENSMUSG00000099689	Zfp383	75.7981	2.34212	0.50461	2.4332	0.0149661	0.163615	195.952	109.029	62.3079	68.0103	31.1954	42.6514	48.4062	63.3972	48.4515	78.7712	52.2698	109.136
ENSMUSG00000056735	A930024E05Rik	257.834	-1.71469	0.319966	-2.43134	0.0150432	0.164292	131.308	215.832	178.554	189.512	288.099	237.317	208.519	492.261	332.239	315.085	274.673	230.609
ENSMUSG00000015488	Cacfd1	534.356	-1.52395	0.25009	-2.43038	0.0150831	0.164562	350.492	497.675	314.33	504.346	517.476	574.153	686.376	764.496	391.765	570.106	611.864	629.193
ENSMUSG00000003541	Ier3	824.772	1.61649	0.285469	2.42711	0.0152195	0.165883	1581.76	987.192	972.748	986.532	989.077	598.213	585.84	626.514	580.034	967.901	529.872	491.586
ENSMUSG00000041957	Pkp2	31.4866	-10.4836	1.39702	-2.42665	0.015239	0.165929	0	8.15861	0	6.87745	0	38.2769	111.707	10.2554	101.056	63.0169	32.7967	5.69405
ENSMUSG00000045092	S1pr1	2697.39	1.75598	0.334787	2.42626	0.0152555	0.165942	5232.12	2383.8	3532.95	3535.01	1651.52	2056.01	1845.64	2808.12	1774.71	3231.59	1065.89	3251.3
ENSMUSG00000041298	Katnal1	194.617	-1.75226	0.33361	-2.42565	0.015281	0.166052	177.771	109.029	151.585	109.275	243.141	272.313	235.825	206.973	123.205	160.496	270.573	275.212
ENSMUSG00000026663	Atf6	3615.71	-1.71169	0.319804	-2.42468	0.0153217	0.166328	2088.81	2723.49	1508.41	1225.71	3444.34	2484.71	3238.25	3749.76	5414.11	2844.62	9206.66	5459.65
ENSMUSG00000005442	Cic	557.954	-1.81217	0.353899	-2.42363	0.0153663	0.166635	192.922	445.015	384.077	244.532	911.089	275.593	589.563	519.298	700.47	671.524	910.109	851.261
ENSMUSG00000032085	Tagln	36.1196	5.01992	0.96054	2.42329	0.0153807	0.166635	151.509	55.6269	16.7394	33.6231	0	26.247	11.1707	13.9847	63.6791	13.785	20.498	26.5722
ENSMUSG00000026374	Tsn	73.0358	3.19599	0.692081	2.42206	0.0154328	0.167032	212.113	61.5604	86.4871	51.963	15.5977	71.0856	32.2708	10.2554	33.2239	137.85	100.44	63.5836
ENSMUSG00000074899	Sptbn5	103.209	-4.53616	0.900917	-2.42139	0.0154612	0.167056	0	89.003	23.2492	14.5191	275.253	25.1534	147.701	128.659	207.649	82.7097	176.282	68.3286
NA	NA	6.91583	46.8494	2.29216	2.42128	0.0154658	0.167056	32.322	11.8671	14.8795	0	0.917511	0	0	0	0	0	3.07469	19.9292
ENSMUSG00000043263	Ifi209	2340.91	1.35248	0.180063	2.41919	0.015555	0.167852	3191.8	2581.83	2800.14	2640.18	1734.1	1984.93	1973.48	2597.42	2102.8	1715.24	2477.18	2291.86
ENSMUSG00000020644	Id2	13019.9	1.40974	0.204975	2.41701	0.0156487	0.168695	20675	17489.1	12587.1	18301.7	11626.7	13763.3	12578.2	11015.3	9813.5	12568.9	7148.66	8672.04
ENSMUSG00000069662	Marcks	7714.71	1.50123	0.242546	2.41662	0.0156656	0.168708	11708.6	11588.2	6597.2	9784.32	8953.99	5912.13	4604.8	6957.84	5747.73	8476.76	6137.09	6107.82
ENSMUSG00000051703	Tmem198	116.744	-2.19029	0.468836	-2.41262	0.0158382	0.170297	62.6239	59.3353	47.4284	125.322	277.088	117.018	76.9535	174.342	149.507	94.5254	95.3155	121.473
ENSMUSG00000087648	E130018N17Rik	5.62127	-107.251	2.79582	-2.41248	0.0158445	0.170297	0	0	0	0	0	13.1235	34.7532	19.5786	0	0	0	0
ENSMUSG00000021025	Nfkbia	13985.5	-1.31805	0.165247	-2.41096	0.0159106	0.170838	14317.6	10330.3	13682.6	13852.7	14050.8	17580	20482	16667.9	12715.1	10841.9	10719.4	12585.7
ENSMUSG00000034837	Gnat1	6.23873	89.2713	2.68821	2.41057	0.0159275	0.17085	12.1207	0	44.6385	11.4624	0	0	0	0	0	0	0	6.64306
ENSMUSG00000068580	Zfyve19	13.0447	-11.2341	1.44868	-2.40896	0.0159982	0.171336	0	0	4.64985	5.34913	37.618	60.1493	3.72356	11.1877	0	16.7389	13.3237	3.79603
ENSMUSG00000052688	Rab7b	101.848	2.08214	0.439248	2.40881	0.0160044	0.171336	170.701	160.205	136.705	81.7652	68.8134	95.1453	35.9944	63.3972	52.6045	136.865	112.739	107.238
ENSMUSG00000039167	Adgrl4	15.2328	-16.3396	1.67348	-2.40833	0.0160256	0.171393	0	10.3837	0	0	33.9479	20.7789	64.5416	53.1418	0	0	0	0
ENSMUSG00000096995	2810029C07Rik	71.1731	2.70845	0.597008	2.40778	0.0160497	0.171482	51.5132	74.1692	97.6468	167.351	36.7005	24.0597	27.3061	55.9387	160.582	38.4009	36.8963	83.5127
ENSMUSG00000030107	Usp18	461.113	1.85615	0.37098	2.40529	0.0161597	0.172487	303.019	696.449	764.435	843.634	233.965	206.695	387.25	577.101	463.75	355.455	362.814	338.796
ENSMUSG00000004846	Plod3	1174.58	-1.36702	0.187558	-2.40479	0.0161816	0.172551	1033.29	1025.76	826.743	790.907	1462.51	1118.78	1367.79	1076.82	1470.16	1197.32	1553.74	1171.08
ENSMUSG00000057637	Prdm2	379.05	-1.86999	0.376117	-2.40093	0.0163535	0.174212	189.892	279.618	180.414	226.956	575.28	189.197	309.055	565.913	447.138	299.33	613.914	671.898
ENSMUSG00000000346	Dazap2	13577	1.29113	0.153653	2.39916	0.0164329	0.174886	18463.9	13854.8	14813.5	17718.6	11624	13686.7	12562	12355	12666.6	13212.9	9686.31	12279.2
ENSMUSG00000057729	Prtn3	174.152	-9.07016	1.32663	-2.3979	0.0164892	0.175313	0	126.829	20.4593	28.274	501.879	859.589	115.43	117.471	70.6008	140.803	106.589	1.89802
ENSMUSG00000030560	Ctsc	1177.25	1.60523	0.284832	2.39714	0.0165237	0.175475	1958.51	1912.08	1494.46	926.927	945.037	793.971	906.065	1273.54	1020.25	1256.4	1036.17	603.569
ENSMUSG00000034926	Dhcr24	700.806	1.48992	0.239997	2.39685	0.0165368	0.175475	761.587	912.281	1020.18	636.546	734.009	532.595	397.179	569.643	574.496	779.834	800.445	690.878
ENSMUSG00000098065	Gm5177	5.49697	17.4107	1.72128	2.39467	0.0166353	0.176174	0	7.41692	32.5489	10.6983	0.917511	0	0	1.86462	2.76866	2.95392	2.0498	4.74504
ENSMUSG00000118314	1700001K23Rik	6.46112	-96.6893	2.75409	-2.39472	0.0166329	0.176174	0	0	0	0	21.1028	18.5916	21.1002	0	0	16.7389	0	0
ENSMUSG00000045827	Serpinb9	10022.2	1.52039	0.252567	2.39318	0.0167029	0.176373	18430.6	13778.4	7903.81	10714.3	8691.59	10522.9	5906.8	8307.83	7626.27	8524.02	10197.7	9661.85
ENSMUSG00000051748	Wfdc21	92.1061	-4.13223	0.855236	-2.3934	0.0166932	0.176373	63.6339	11.1254	32.5489	73.3595	337.644	352.147	38.4768	17.7139	102.44	16.7389	33.8216	25.6232
ENSMUSG00000054426	A930005H10Rik	18.6523	6.02324	1.08226	2.39364	0.0166821	0.176373	35.3522	37.8263	26.0391	29.0381	9.17511	12.0299	0	0	8.30597	27.5699	7.17428	31.3173
ENSMUSG00000064147	Rab44	110.231	-3.4937	0.755807	-2.38786	0.016947	0.178603	23.2314	106.804	37.1988	48.9063	528.487	104.988	42.2003	80.1788	80.2911	136.865	112.739	20.8782
ENSMUSG00000028434	Epb41l4b	10.057	-33.6888	2.12492	-2.38794	0.0169429	0.178603	0	0	0	2.29248	40.3705	19.6852	0	19.5786	0	0	23.5726	15.1841
ENSMUSG00000015947	Fcgr1	711.597	1.93366	0.398951	2.38459	0.017098	0.179322	1734.28	1324.66	539.382	882.606	531.239	542.438	579.634	663.806	430.526	810.358	270.573	229.66
ENSMUSG00000026887	Mrrf	462.926	1.45387	0.226344	2.38531	0.0170647	0.179322	718.154	625.246	550.542	534.149	350.489	535.876	384.768	399.03	314.243	408.625	300.295	433.697
ENSMUSG00000021650	Ptcd2	1680.33	1.31992	0.167928	2.38468	0.017094	0.179322	1799.93	1761.52	2119.4	2436.91	1301.03	1571.54	1799.72	1480.51	1549.06	1366.68	1558.87	1418.77
ENSMUSG00000029552	Tes	3392.43	1.31142	0.164019	2.38464	0.0170961	0.179322	5148.29	3701.04	3393.46	3706.18	2906.68	3322.43	2868.38	3062.65	3136.89	3120.32	2827.69	3515.13
ENSMUSG00000106799	Gm20756	5.1304	-66.6953	2.54043	-2.38523	0.0170685	0.179322	0	0	0	0	15.5977	16.4044	9.92948	0	12.459	0	7.17428	0
ENSMUSG00000079051	Vinac1	6.06116	-98.75	2.78104	-2.38246	0.0171976	0.180018	0	0	0	0	29.3604	0	0	32.6309	0	0	4.09959	6.64306
ENSMUSG00000030835	Nomo1	3192.12	-1.41313	0.20938	-2.38273	0.0171849	0.180018	2798.88	2287.38	2041.28	1848.51	3392.04	2378.63	3464.15	3447.69	4568.28	3023.83	4925.66	4129.14
ENSMUSG00000035929	H2-Q4	7389.99	-1.29491	0.156596	-2.38097	0.0172669	0.180569	5827.05	6598.83	6214.05	7370.33	9431.1	7941.9	8668.44	7641.23	7388.16	5990.55	8739.3	6868.92
NA	NA	19.2931	-12.6847	1.53964	-2.38044	0.0172919	0.180656	0	0	8.36972	0	0	72.1792	14.8942	17.7139	53.9888	19.6928	26.6473	18.0312
ENSMUSG00000036887	C1qa	10834.8	1.92857	0.39847	2.37793	0.0174101	0.181716	30243.3	19002.9	9295.04	11541.1	9254.94	8010.8	8726.78	10345.9	6664.16	10700.1	2371.61	3860.57
ENSMUSG00000051403	Ppp1r37	1228.72	-1.38445	0.197531	-2.37586	0.0175079	0.182561	866.633	1037.63	1203.38	949.088	1557.02	1150.49	1198.99	1708	1222.36	1053.56	1458.43	1339.05
ENSMUSG00000020547	Bzw2	2769.02	1.42086	0.213374	2.375	0.017549	0.182713	4093.78	3617.23	3271.63	3049.77	2978.24	2854.36	1889.08	2152.71	2005.89	3073.06	1888.89	2353.54
ENSMUSG00000026630	Batf3	1563.57	1.53444	0.260106	2.37485	0.0175562	0.182713	1487.82	1616.89	2276.56	3486.1	1385.44	1614.19	1477.01	1303.37	874.896	1281.02	997.225	962.294
ENSMUSG00000053964	Lgals4	8.14914	-90.0576	2.73575	-2.37331	0.0176295	0.182949	0	0	0	0	35.7829	20.7789	0	0	16.6119	24.616	0	0
ENSMUSG00000027322	Siglec1	218.929	3.35195	0.735207	2.37348	0.0176213	0.182949	381.803	949.365	92.9969	119.209	312.871	51.4004	39.7179	55.9387	89.9814	292.438	133.237	108.187
ENSMUSG00000020577	Tspan13	13986.9	1.33494	0.175574	2.37379	0.0176065	0.182949	20619.4	15584.4	14847.9	16435.6	11253.3	13470.2	13305.5	12525.6	15674.8	12682.2	9825.69	11617.8
ENSMUSG00000024601	Isoc1	1964.87	1.33889	0.177499	2.37204	0.0176901	0.183226	2299.91	2157.58	1966.88	2179.39	1498.3	1834.01	1515.49	1578.4	1823.16	1702.44	2676.01	2346.9
ENSMUSG00000038179	Slamf7	80.9588	-2.39903	0.532216	-2.37206	0.0176892	0.183226	36.3622	20.7674	65.0978	65.7179	109.184	42.6514	191.143	108.148	106.593	72.8633	92.2408	60.7365
ENSMUSG00000067767	Clec4b2	280.479	2.62341	0.586731	2.37152	0.0177151	0.18331	503.011	270.717	624.939	599.867	202.77	357.615	81.9182	119.336	67.8321	336.747	35.8714	165.127
ENSMUSG00000018965	Ywhah	5273.5	1.33513	0.175887	2.37074	0.0177525	0.183347	6546.21	5314.96	6479.09	7695.87	4475.62	5831.21	4573.77	4620.54	3755.68	5401.73	4059.62	4527.72
ENSMUSG00000045326	Fndc7	72.2482	1.84533	0.372779	2.37106	0.0177373	0.183347	129.288	81.5861	97.6468	101.633	65.1433	60.1493	42.2003	54.0741	41.5299	72.8633	68.6681	52.1955
ENSMUSG00000026854	Usp20	595.23	-1.61839	0.293135	-2.36941	0.0178166	0.183834	219.183	413.122	590.53	390.486	675.288	652.894	600.734	682.452	840.287	479.519	719.478	878.782
ENSMUSG00000048534	Jaml	2613.91	1.48786	0.242231	2.36649	0.0179575	0.184703	2577.68	2030.75	3674.31	4147.87	1591.88	2265.99	2517.12	1981.16	2430.88	2660.5	3213.05	2275.72
ENSMUSG00000046727	Cystm1	455.954	1.68901	0.319596	2.36605	0.0179788	0.184703	685.832	548.852	640.749	694.623	320.211	564.31	278.026	358.94	301.784	540.567	197.805	339.745
ENSMUSG00000039095	En2	5.27147	-90.8565	2.7497	-2.3659	0.0179861	0.184703	0	0	0	0	0	18.5916	12.4119	26.1047	0	0	6.14939	0
ENSMUSG00000075273	Ttc30b	70.4365	-3.40485	0.747095	-2.36595	0.0179837	0.184703	0	20.7674	38.1287	41.2647	80.741	117.018	89.3654	55.0064	58.1418	90.5868	88.1412	166.076
ENSMUSG00000074406	Zfp628	532.097	-1.53686	0.261985	-2.3665	0.0179572	0.184703	277.767	468.749	467.774	410.355	880.811	423.233	636.728	556.59	568.959	576.014	605.715	512.465
ENSMUSG00000031137	Fgf13	5.12545	-68.3676	2.57677	-2.36546	0.0180077	0.18475	0	0	0	0	5.50507	32.8087	0	4.66156	0	13.785	0	4.74504
ENSMUSG00000006651	Aplp1	144.25	-2.4397	0.544321	-2.36387	0.0180851	0.185368	55.5534	45.2432	116.246	81.7652	105.514	88.5836	422.003	113.742	88.597	183.143	227.527	203.088
ENSMUSG00000056201	Cfl1	48852	1.38268	0.197914	2.36198	0.0181777	0.186111	75065.8	56669	49438.1	69903.2	41519.2	54782.9	44386	40898.7	42716.2	46307.6	28598.7	35938.9
ENSMUSG00000000402	Egfl6	8.27231	-90.334	2.75108	-2.36169	0.018192	0.186111	0	0	0	0	0	0	33.512	23.3078	33.2239	0	9.22408	0
ENSMUSG00000035936	Aldh5a1	54.1088	-3.72415	0.804385	-2.35821	0.0183632	0.187654	0	31.8927	22.3193	26.7456	40.3705	31.7151	165.078	66.1942	74.7537	71.8787	60.469	57.8895
ENSMUSG00000029765	Plxna4	63.1638	-3.87376	0.828581	-2.35793	0.0183774	0.187654	5.05031	3.70846	24.1792	42.793	42.2055	22.9661	103.018	125.862	146.739	24.616	57.3943	159.433
ENSMUSG00000040128	Pnrc1	7085.45	-1.36218	0.189267	-2.35601	0.0184725	0.188448	6019.97	3988.82	6110.83	7433.76	7830.96	6941.23	8409.03	8901.72	8217.37	6958.45	7305.47	6907.83
ENSMUSG00000074781	Ube2n	1725.65	1.42055	0.215035	2.35519	0.0185133	0.188686	2542.33	2245.84	1751.13	2313.12	1605.64	1486.24	1697.94	1442.29	1593.36	1781.21	917.283	1331.46
ENSMUSG00000046908	Ltb4r1	94.1928	-2.39117	0.534181	-2.35447	0.0185489	0.188694	111.107	59.3353	31.619	25.9815	181.667	193.572	65.7828	102.554	81.6754	84.679	124.013	68.3286
ENSMUSG00000028639	Ybx1	16642.5	1.33185	0.17557	2.35481	0.0185321	0.188694	25996	19033.3	17212.8	19810.9	14376.5	18103.9	15504.9	13622.9	14798.5	16206.2	11755.6	13289
ENSMUSG00000032470	Mras	417.77	1.62528	0.297718	2.35353	0.018596	0.188995	646.44	559.977	373.848	781.737	408.293	217.631	378.562	448.442	263.022	260.929	302.345	372.011
ENSMUSG00000043165	Lor	8.03195	-58.5512	2.49655	-2.3519	0.0186779	0.189498	0	0	0	0	1.83502	34.996	0	0	17.9963	36.4317	5.12449	0
ENSMUSG00000027670	Ocstamp	535.709	1.54447	0.266647	2.35185	0.0186804	0.189498	950.468	703.865	557.052	652.594	623.908	429.794	367.391	431.66	387.612	365.301	363.839	595.028
ENSMUSG00000021775	Nr1d2	858.296	-1.5425	0.265983	-2.35081	0.0187328	0.189851	556.544	602.995	423.136	561.658	946.872	499.786	769.535	1090.81	1431.4	937.377	1469.7	1009.74
ENSMUSG00000017607	Tns4	27.7181	5.12354	1.00285	2.35044	0.0187513	0.189861	30.3019	39.3097	40.9186	65.7179	2.75253	7.65537	6.20593	17.7139	20.7649	0	60.469	40.8074
ENSMUSG00000021003	Galc	974.403	1.62283	0.297282	2.34966	0.0187908	0.190084	1460.55	1628.01	830.462	969.721	1184.51	662.736	484.062	679.655	856.899	1131.35	831.192	973.683
ENSMUSG00000011463	Cpb1	21.5889	14.1078	1.62653	2.34759	0.0188951	0.190961	0	19.284	56.7281	105.454	5.50507	0	7.44711	0	0	47.2627	4.09959	13.2861
ENSMUSG00000029797	Sspo	590.35	-1.97531	0.418681	-2.34564	0.0189943	0.191784	387.864	483.583	281.781	217.022	1323.97	320.432	397.179	663.806	804.295	811.343	958.279	434.646
ENSMUSG00000019975	Ikbip	231.247	-1.77877	0.354386	-2.34455	0.0190499	0.192166	90.9056	232.15	198.083	180.342	227.543	276.687	388.491	357.076	297.631	155.573	158.859	211.629
ENSMUSG00000031438	Rnf128	5.62188	-46.6264	2.3656	-2.3432	0.0191193	0.192687	0	0	0	0	11.0101	16.4044	0	1.86462	0	1.96928	2.0498	34.1643
ENSMUSG00000027712	Anxa5	7466.65	1.37933	0.198142	2.34158	0.0192025	0.193345	12785.4	8514.62	7028.71	9658.23	6985.93	8049.08	6008.58	6495.42	5969.22	6741.83	5002.53	6360.25
ENSMUSG00000024835	Coro1b	14753.9	1.30404	0.163593	2.34107	0.0192285	0.193428	21783	15137.9	15671.8	20612.5	13037.8	15658.5	13892.6	13548.4	12255.5	13292.6	10235.7	11920.5
ENSMUSG00000019518	Ap4m1	376.942	1.52685	0.260966	2.33962	0.0193033	0.19382	494.93	351.562	559.841	465.374	400.035	297.466	259.408	267.574	354.388	250.098	433.532	389.093
ENSMUSG00000028484	Psip1	1498.29	-1.4634	0.234767	-2.33987	0.0192903	0.19382	885.825	956.782	1331.72	845.926	1123.03	1457.8	1496.87	1804.96	2285.53	1470.07	2526.37	1794.57
ENSMUSG00000044408	Sptssa	2124.22	1.32852	0.175245	2.33854	0.0193595	0.194205	2546.37	2404.56	2437.45	2707.42	1612.99	2264.9	1856.81	1865.56	2368.59	2036.23	1511.72	1878.09
ENSMUSG00000070738	Dgkd	4472.92	-1.59892	0.289617	-2.33792	0.0193914	0.194345	3326.13	3482.98	2770.38	1688.8	5328.91	2622.51	5340.82	4724.03	6385.91	3926.74	8051.6	6026.2
ENSMUSG00000079186	Gzmc	105.802	-2.60637	0.592414	-2.33289	0.0196537	0.196609	123.228	45.9849	45.5685	42.0289	119.276	190.291	112.948	245.198	17.9963	159.512	97.3653	70.2266
ENSMUSG00000018651	Tada2a	258.753	-1.81421	0.368352	-2.33294	0.0196512	0.196609	84.8452	226.216	212.033	278.919	284.429	553.374	323.949	295.543	186.884	254.037	186.531	218.272
ENSMUSG00000056529	Ptafr	2738.22	1.95235	0.413914	2.33192	0.0197051	0.196942	5331.11	4757.21	2052.44	2242.05	3326.9	2022.11	625.557	1391.01	2727.13	3286.73	1900.16	3196.26
ENSMUSG00000027593	Raly	4.96561	-62.9526	2.56358	-2.33119	0.0197434	0.197143	0	0	0	0	0	5.46812	21.1002	13.0524	0	0	13.3237	6.64306
ENSMUSG00000027007	Itprid2	3023.06	1.40479	0.210427	2.33028	0.0197915	0.197442	3196.85	3715.13	2614.14	2663.1	2693.81	2075.7	1786.07	2120.08	2930.62	3587.04	5050.7	3843.48
ENSMUSG00000025983	Ccdc150	5.75856	90.4173	2.79116	2.32825	0.0198987	0.198328	23.2314	0	34.4089	11.4624	0	0	0	0	0	0	0	0
ENSMUSG00000080115	Eef1akmt3	84.1452	-4.17538	0.8858	-2.32773	0.0199262	0.198419	92.9257	8.15861	0	32.8589	80.741	135.609	135.289	206.041	89.9814	32.4931	130.162	65.4816
ENSMUSG00000027004	Frzb	6.40808	89.0198	2.78441	2.32583	0.0200278	0.199216	53.5333	0	0	14.5191	0	0	0	0	0	0	4.09959	4.74504
ENSMUSG00000026407	Cacna1s	9.76704	-10.4656	1.45669	-2.32554	0.020043	0.199216	0	0	5.57981	1.52832	4.58756	18.5916	23.5825	27.037	12.459	0	14.3486	9.49008
ENSMUSG00000021464	Ror2	24.0544	-7.88452	1.28191	-2.3239	0.0201307	0.199905	13.1308	0	0	6.11329	33.0304	40.4641	8.6883	68.0588	24.9179	82.7097	2.0498	9.49008
ENSMUSG00000048109	Rbm15	523.705	-1.56828	0.279653	-2.32139	0.0202657	0.200406	304.029	480.616	445.455	288.853	598.217	448.386	651.622	684.317	426.373	472.627	803.52	680.439
ENSMUSG00000020358	Hnrnpab	154.444	1.78438	0.359903	2.32124	0.0202737	0.200406	262.616	272.943	140.425	181.87	89.9161	159.669	105.501	125.862	103.825	190.035	121.963	98.6969
ENSMUSG00000033318	Gstt2	582.539	-1.57143	0.280795	-2.32224	0.02022	0.200406	625.228	368.621	345.019	567.772	590.877	736.009	675.205	992.912	703.239	539.582	416.108	429.901
ENSMUSG00000031007	Atp6ap2	5070.5	1.34129	0.182482	2.32142	0.0202641	0.200406	6761.36	6871.03	5127.85	5745.73	4678.39	5128.01	4352.84	4111.5	5635.6	4917.29	3528.72	3987.73
ENSMUSG00000052776	Oas1a	438.223	1.62095	0.300145	2.32169	0.0202497	0.200406	781.788	756.526	492.884	579.234	360.582	582.902	351.255	316.054	249.179	288.499	341.291	158.484
ENSMUSG00000015839	Nfe2l2	5928.71	1.65249	0.312299	2.32034	0.0203227	0.200582	12341.9	9071.63	4732.61	5352.18	6491.39	5778.71	2894.44	3895.2	5001.58	6227.84	4238.98	5118
ENSMUSG00000052102	Gnpda1	1209.08	1.37057	0.196006	2.32023	0.0203285	0.200582	1703.97	1733.33	1262.9	1328.11	1258.83	954.734	1077.35	1106.65	887.355	1065.38	855.79	1274.52
ENSMUSG00000032067	Pts	5.76372	-59.1475	2.53989	-2.31752	0.0204756	0.201817	0	0	0	0	0	0	26.0649	11.1877	13.8433	0	13.3237	4.74504
ENSMUSG00000027030	Stk39	648.762	1.66765	0.31846	2.31683	0.020513	0.201817	1157.53	880.388	550.542	803.898	613.815	376.207	491.509	551.929	305.937	644.939	847.59	560.864
ENSMUSG00000074922	Fam122a	680.035	-1.5257	0.263094	-2.31655	0.0205282	0.201817	443.417	515.476	510.553	606.744	689.969	762.256	1112.1	606.003	1063.16	591.768	623.138	635.836
ENSMUSG00000116903	Gm19522	6.31021	-57.8474	2.52709	-2.31657	0.0205271	0.201817	0	0	0	0	0	0	11.1707	25.1724	16.6119	19.6928	3.07469	0
ENSMUSG00000026687	Aldh9a1	4397.38	-1.25615	0.142071	-2.3158	0.0205691	0.202036	4125.09	3867.92	3490.17	3846.02	4518.74	4752.89	5086.38	4898.37	5104.02	3630.37	4591.54	4857.02
ENSMUSG00000024507	Hsd17b4	3427.07	1.34336	0.184056	2.31368	0.0206851	0.202991	5279.59	4560.66	3032.63	3876.59	3248.91	3081.83	2744.26	3391.75	3132.74	3230.6	2629.89	2915.35
ENSMUSG00000086859	Snhg20	353.648	-1.55709	0.276274	-2.31237	0.0207571	0.203513	179.791	297.418	393.377	340.052	419.303	404.641	553.569	509.042	314.243	340.685	231.627	260.028
ENSMUSG00000000001	Gnai3	4198.99	1.33286	0.179356	2.31121	0.020821	0.203952	5760.38	4763.14	3774.74	4180.73	3089.26	3916.27	2921.75	3935.29	4234.66	4129.58	4591.54	5090.48
ENSMUSG00000053799	Exoc6	1319.03	1.39202	0.206494	2.31088	0.0208394	0.203952	1714.08	1379.55	1735.32	1343.4	879.893	1150.49	960.678	1441.35	1122.69	1193.38	1585.52	1321.97
ENSMUSG00000031668	Eif2ak3	43.4491	-3.6641	0.810975	-2.31013	0.0208808	0.203988	15.1509	18.5423	14.8795	25.2173	34.8654	84.2091	109.224	42.8864	132.896	8.86175	19.4731	15.1841
ENSMUSG00000038372	Gmds	615.861	-1.53865	0.269091	-2.31022	0.0208758	0.203988	440.387	466.524	400.817	482.95	701.896	569.778	867.589	617.191	1136.53	550.413	543.196	613.059
ENSMUSG00000022811	Zfp148	7.12693	-84.9356	2.77575	-2.30867	0.0209619	0.204227	0	0	0	0	0	0	27.3061	26.1047	0	16.7389	15.3735	0
ENSMUSG00000031933	Izumo1r	394.939	-1.86114	0.38811	-2.30911	0.0209373	0.204227	311.099	214.349	270.621	403.477	323.882	583.996	816.7	509.042	395.918	509.059	149.635	251.487
ENSMUSG00000019947	Arid5b	223.064	-2.06842	0.45413	-2.30888	0.0209501	0.204227	105.046	128.313	90.207	125.322	429.395	126.86	110.466	261.047	347.466	159.512	483.752	309.377
ENSMUSG00000079227	Ccr5	1397.79	-1.48214	0.245982	-2.30781	0.0210095	0.204342	904.006	974.583	1100.15	994.938	1577.2	1136.28	1628.44	1547.64	1082.54	1636.47	2581.72	1609.52
ENSMUSG00000045038	Prkce	409.602	-1.60631	0.296279	-2.30778	0.0210114	0.204342	225.244	289.26	229.702	218.55	397.282	261.376	374.838	512.772	804.295	354.47	672.333	575.099
ENSMUSG00000052395	Rft1	438.518	-1.51138	0.258337	-2.30657	0.0210789	0.204815	345.441	383.455	193.434	340.052	432.148	423.233	506.404	547.267	591.108	567.152	546.27	386.246
ENSMUSG00000034064	Poglut1	15.835	16.7835	1.76494	2.30545	0.0211416	0.205177	28.2817	16.3172	27.8991	0	0	4.3745	0	0	0	20.6774	44.0706	48.3994
ENSMUSG00000037262	Kin	829.566	1.47098	0.241529	2.30522	0.0211541	0.205177	1062.59	704.607	1259.18	1135.54	833.1	776.473	661.552	557.523	618.795	977.747	655.935	711.756
ENSMUSG00000038264	Sema7a	2917.25	1.65458	0.315217	2.30465	0.0211863	0.205306	5432.11	5291.97	2908.01	2184.74	3549.85	2525.18	1516.73	1966.25	2458.57	2437.97	1872.49	2863.16
ENSMUSG00000035186	Ubd	562.611	1.6757	0.323241	2.30406	0.0212196	0.205445	1124.2	1110.31	400.817	677.047	511.971	417.765	547.363	499.719	449.907	372.194	402.785	237.252
ENSMUSG00000041695	Kcnj2	58.7133	2.607	0.600127	2.3035	0.021251	0.205497	127.268	128.313	47.4284	36.6797	55.9682	17.498	19.859	36.3602	80.2911	72.8633	44.0706	37.9603
ENSMUSG00000021831	Ero1l	997.518	-1.33167	0.179414	-2.30328	0.0212629	0.205497	740.376	802.51	707.707	658.707	955.129	910.989	945.783	1061.9	1254.2	1218	1663.41	1051.5
ENSMUSG00000096549	Prickle4	12.9898	50.1288	2.45254	2.30275	0.0212931	0.205605	0	0	32.5489	30.5664	0.917511	0	0	0	17.9963	73.848	0	0
ENSMUSG00000033446	Lpar6	2114.72	1.4443	0.230359	2.30234	0.0213157	0.205641	2741.31	2831.04	2046.86	2874.77	1638.68	2304.27	1412.47	1910.31	1787.17	2534.46	1325.19	1970.14
ENSMUSG00000042333	Tnfrsf14	498.37	1.53689	0.269383	2.30159	0.0213582	0.205867	509.071	624.504	680.737	440.921	409.21	423.233	325.191	309.528	325.317	643.954	653.885	634.887
ENSMUSG00000021578	Ccdc127	140.89	-2.363	0.539656	-2.29891	0.0215101	0.206436	58.5836	80.8444	79.0474	35.9156	77.071	127.954	264.373	132.388	299.015	54.1552	297.22	184.108
ENSMUSG00000029201	Ugdh	924.49	1.36311	0.194318	2.29984	0.0214572	0.206436	1430.25	938.982	977.398	1044.61	929.439	711.95	683.893	893.155	899.814	880.268	906.01	798.116
ENSMUSG00000030275	Etnk1	4877.39	-1.58117	0.287491	-2.29918	0.0214948	0.206436	2959.48	3784.11	2225.42	1919.57	5235.32	3157.29	3577.1	5246.12	6893.96	5034.46	11581.3	6914.47
ENSMUSG00000044345	Marveld1	1205.08	1.45647	0.23593	2.29932	0.0214866	0.206436	1349.44	1439.62	1610.71	1458.02	1461.6	703.201	1110.86	745.85	1132.38	989.563	1189.91	1269.77
NA	NA	6.88069	-26.644	2.06003	-2.29887	0.0215125	0.206436	0	0	0	0	0	13.1235	3.72356	0	16.6119	20.6774	12.2988	16.1331
ENSMUSG00000000732	Icosl	1557.24	1.50894	0.258261	2.2982	0.0215506	0.206618	1217.12	1765.97	1804.14	2872.48	1577.2	964.577	1109.62	1424.57	1351.1	1351.91	1546.57	1701.57
ENSMUSG00000029196	Tada2b	737.483	-1.42966	0.224521	-2.29678	0.0216315	0.207058	557.554	583.711	514.273	379.788	657.856	812.563	830.353	609.732	989.795	708.94	1047.45	1157.79
ENSMUSG00000018916	Csf2	86.9914	-2.61619	0.604107	-2.29672	0.0216346	0.207058	89.8955	67.4939	36.2688	28.274	274.336	146.546	44.6827	113.742	34.6082	83.6944	90.191	34.1643
ENSMUSG00000034593	Myo5a	2348.27	-1.75668	0.35414	-2.29529	0.0217163	0.207656	729.265	1831.98	813.723	748.114	2091.93	1434.84	1627.19	2090.24	5079.1	2042.14	6324.64	3366.13
ENSMUSG00000037266	Rsrp1	5887.98	-1.35255	0.189853	-2.29485	0.0217418	0.207717	4125.09	6881.42	4376.43	5336.9	8687.92	6052.12	6801.7	6485.16	5613.45	5106.34	5592.87	5596.3
ENSMUSG00000056749	Nfil3	3749.36	-1.33715	0.182704	-2.29419	0.0217794	0.20782	3417.04	3109.17	2830.83	3231.64	4993.1	4925.68	3726.04	3187.57	4483.84	3296.57	3722.43	4068.4
ENSMUSG00000001999	Blvra	2475.19	1.5558	0.277968	2.29399	0.021791	0.20782	4765.47	3636.51	2616	2977.17	2331.4	2629.07	1990.86	2043.63	1787.17	2579.76	1015.67	1329.56
ENSMUSG00000014956	Ppp1cb	6237.09	1.24403	0.137381	2.29301	0.0218475	0.208176	7310.83	6914.05	6753.44	5919.96	5283.95	5399.22	4977.15	5959.34	6168.57	5977.75	7686.73	6494.06
ENSMUSG00000004633	Chn2	208.246	1.85799	0.389908	2.29219	0.0218944	0.208439	359.582	244.758	296.66	324.004	324.799	117.018	124.119	92.2989	166.119	130.957	176.282	142.351
ENSMUSG00000038909	Kat7	6.26239	-88.0369	2.82	-2.29079	0.0219756	0.208479	0	0	0	0	42.2055	0	0	13.0524	0	0	12.2988	7.59207
ENSMUSG00000034563	Ccpg1	19.0864	-8.05311	1.3137	-2.29089	0.0219697	0.208479	0	0	0	17.5757	46.7931	53.5876	14.8942	27.9694	8.30597	11.8157	21.5229	26.5722
ENSMUSG00000061024	Rrs1	1161.16	1.4897	0.25095	2.29139	0.0219409	0.208479	2252.44	1270.52	1297.31	1193.62	1324.89	904.427	970.607	835.352	877.664	1218	861.939	927.181
ENSMUSG00000027487	Cdk5rap1	406.435	1.92366	0.41188	2.29158	0.0219298	0.208479	576.745	696.449	280.851	931.512	211.028	195.759	435.656	450.307	265.791	215.636	431.482	186.006
NA	NA	81.2421	3.06922	0.706436	2.29019	0.0220102	0.208625	331.3	150.563	55.7981	37.4439	36.7005	31.7151	42.2003	76.4496	109.362	45.2934	40.9959	17.0822
ENSMUSG00000027551	Zfp64	492.596	-1.76121	0.356715	-2.28912	0.0220724	0.209032	424.226	258.109	280.851	276.626	531.239	599.306	601.975	450.307	982.873	275.699	423.283	806.657
ENSMUSG00000032462	Pik3cb	2008.43	1.62619	0.306785	2.28661	0.0222189	0.210151	1630.24	2434.97	2382.58	2195.44	1548.76	1141.74	1038.87	1584.93	1691.65	1462.19	4271.77	2717.96
ENSMUSG00000041556	Fbxo2	67.9431	-5.23556	1.04458	-2.28643	0.0222294	0.210151	0	56.3686	0	32.8589	108.266	137.797	106.742	116.539	84.444	14.7696	102.49	55.0425
ENSMUSG00000025491	Ifitm1	36.2278	-3.72885	0.83126	-2.28416	0.0223621	0.211038	35.3522	18.5423	6.50978	19.8682	97.2562	37.1832	68.2652	96.0281	17.9963	0	22.5477	15.1841
ENSMUSG00000031904	Slc7a6	11.0543	20.9286	1.92078	2.28417	0.0223613	0.211038	0	43.0181	4.64985	12.2266	2.75253	0	0	0	0	29.5392	8.19918	32.2663
ENSMUSG00000050022	Amz1	2825.43	1.66152	0.32078	2.28351	0.0224004	0.211215	4299.83	5903.87	2521.15	2945.84	3846.21	2282.39	1241.19	2060.41	2144.32	2335.56	1880.69	2443.7
ENSMUSG00000091694	Apol11b	413.291	-2.37525	0.547092	-2.2813	0.0225307	0.212074	49.493	299.643	314.33	149.011	255.986	613.523	757.123	304.866	290.709	566.168	1072.04	286.601
ENSMUSG00000021676	Iqgap2	1388.72	1.48674	0.250791	2.28141	0.0225243	0.212074	1647.41	1588.7	1350.32	1186.74	1171.66	1046.6	620.593	1042.32	1349.72	1538.99	2486.4	1635.14
ENSMUSG00000031953	Tmem170	210.771	-1.99178	0.436183	-2.279	0.022667	0.213172	162.62	142.405	46.4985	91.6993	189.007	254.815	297.885	141.711	400.071	146.711	308.494	347.337
ENSMUSG00000036632	Alg5	2395.16	-1.56778	0.284778	-2.27801	0.0227261	0.213358	2146.38	1502.67	1743.69	1717.83	2146.06	3106.99	3774.45	2121.01	4099	2660.5	1608.06	2115.34
ENSMUSG00000079555	Haus3	861.345	-1.58579	0.291974	-2.2783	0.0227087	0.213358	539.373	454.657	982.047	770.274	705.566	1164.71	1450.95	1034.87	984.258	748.326	881.412	619.702
ENSMUSG00000022283	Pabpc1	37644.7	1.3213	0.176489	2.27752	0.0227555	0.213401	45225.5	48204.8	36301.3	33473.3	37384	28415.6	25006.2	32710.2	36200.2	40761.1	44752.2	43302.3
ENSMUSG00000039115	Itga9	284.012	2.2277	0.507502	2.27694	0.0227898	0.213401	756.537	701.64	144.145	190.276	290.851	111.55	152.666	248.927	211.802	263.883	203.955	131.912
ENSMUSG00000073144	4930599N23Rik	15.1657	12.3368	1.59192	2.27706	0.0227825	0.213401	0	37.0846	38.1287	64.9537	6.42258	0	4.96474	0	11.0746	0	5.12449	14.2351
ENSMUSG00000047656	Trpt1	20.4556	-8.68926	1.37059	-2.27583	0.0228561	0.213837	0	0	16.7394	2.29248	33.9479	37.1832	68.2652	25.1724	31.8396	0	8.19918	21.8272
ENSMUSG00000026656	Fcgr2b	125.528	-2.08695	0.466468	-2.27539	0.0228823	0.213897	21.2113	84.5529	99.5067	97.8126	92.6687	141.078	192.384	207.906	107.978	150.65	170.133	140.453
NA	NA	5.38221	54.8016	2.53936	2.27465	0.022927	0.21413	0	13.3505	13.9495	14.5191	0	0	0	0	0	19.6928	3.07469	0
ENSMUSG00000028840	Zfp593	718.624	1.53845	0.273284	2.2741	0.0229599	0.214253	1230.26	691.257	903.93	1016.33	671.618	655.081	667.758	502.516	663.093	741.433	326.942	553.272
ENSMUSG00000000157	Itgb2l	53.9061	-8.82871	1.38233	-2.27312	0.0230187	0.214617	0	0	37.1988	20.6324	233.965	196.852	38.4768	41.0217	23.5336	0	53.2947	1.89802
ENSMUSG00000068290	Ddrgk1	4348.23	-1.47086	0.245216	-2.27009	0.0232022	0.215956	4632.14	2772.44	3144.23	3339.38	4515.07	5176.12	6156.28	4579.52	6820.59	3857.82	3398.56	3786.54
ENSMUSG00000097715	Gpr137b-ps	862.54	1.70194	0.337908	2.27038	0.0231845	0.215956	1528.22	1455.94	856.502	971.249	1226.71	629.928	433.174	536.079	436.063	773.927	659.009	843.668
ENSMUSG00000006273	Atp6v1b2	3654.62	1.33771	0.184948	2.26966	0.0232281	0.216012	5151.32	4935.96	3495.75	3548	3130.55	3065.43	2829.9	3778.66	2909.86	3533.87	3586.12	3889.99
ENSMUSG00000021497	Txndc15	2954.83	1.31611	0.174628	2.2693	0.0232503	0.216032	3293.81	2888.89	3767.3	4311.4	2212.12	3081.83	3011.12	2533.09	2429.5	2699.88	2434.13	2794.83
ENSMUSG00000038520	Tbc1d17	1141.5	-1.37529	0.202866	-2.2662	0.0234389	0.216519	761.587	867.779	912.3	1256.28	1302.87	1192.05	1449.7	1281	1421.71	995.47	1018.75	1238.46
ENSMUSG00000038368	Focad	464.721	-1.54027	0.274912	-2.26683	0.0234003	0.216519	219.183	343.403	213.893	282.74	399.117	278.874	450.55	504.381	661.709	582.907	986.976	652.918
ENSMUSG00000091649	Phf11b	2517.48	1.26527	0.149831	2.26555	0.0234791	0.216519	2938.27	2830.3	2882.9	3526.6	2032.29	2660.79	2402.94	2530.29	2314.6	2209.53	1983.18	1898.02
ENSMUSG00000021774	Ube2e1	1952.39	1.28062	0.15748	2.26594	0.0234548	0.216519	2479.7	2190.96	2274.7	2386.48	1770.8	2110.7	1810.89	1595.19	1902.07	1912.17	1421.53	1573.46
ENSMUSG00000028186	Uox	5.4529	85.6138	2.83148	2.26729	0.0233726	0.216519	34.3421	0	15.8095	15.2832	0	0	0	0	0	0	0	0
ENSMUSG00000040552	C3ar1	44.8737	5.65777	1.10378	2.26517	0.0235025	0.216519	191.912	50.435	66.0278	24.4532	36.7005	21.8725	0	0	48.4515	10.831	45.0955	42.7054
ENSMUSG00000032602	Slc25a20	3562.69	1.44797	0.235724	2.26549	0.0234827	0.216519	4589.72	4778.72	3700.35	4919.67	3322.31	3514.91	2344.6	3240.72	3251.79	4411.18	2008.8	2669.56
ENSMUSG00000035561	Aldh1b1	190.79	1.90949	0.411563	2.26742	0.0233649	0.216519	468.669	281.101	165.535	280.447	100.009	97.3326	202.313	226.552	130.127	124.065	138.361	74.9717
ENSMUSG00000007041	Clic1	9813.54	1.34207	0.187373	2.26531	0.0234935	0.216519	13266.2	11274.5	10370.1	14898.1	8262.19	10723	9894.73	8235.11	8120.47	9478.14	5978.23	7261.81
NA	NA	22.7623	-6.70818	1.21146	-2.26663	0.0234129	0.216519	0	0	13.0196	10.6983	16.5152	9.84262	107.983	25.1724	12.459	7.87712	29.722	39.8584
ENSMUSG00000092118	Fancf	150.767	-1.59317	0.296955	-2.26264	0.023658	0.217581	102.016	110.512	158.095	100.105	167.905	176.074	255.684	151.035	145.354	160.496	129.137	152.79
NA	NA	7.41437	-45.5629	2.43498	-2.26277	0.0236502	0.217581	0	0	0	0	22.9378	0	0	5.59387	33.2239	0	21.5229	5.69405
NA	NA	5.46711	-52.0157	2.52101	-2.26135	0.0237378	0.21813	0	0	0	0	16.5152	0	8.6883	7.4585	0	18.7081	0	14.2351
ENSMUSG00000066684	Pilrb1	971.196	1.9128	0.413965	2.26031	0.0238021	0.218536	2486.77	1498.22	926.249	1272.33	838.605	763.35	611.904	1018.08	670.015	1039.78	262.374	266.671
ENSMUSG00000030494	Rhpn2	164.576	-7.27715	1.26739	-2.25927	0.0238667	0.218943	44.4427	0	0	24.4532	107.349	145.452	140.254	107.216	883.202	165.419	209.079	148.045
ENSMUSG00000022914	Brwd1	120.651	-2.19821	0.503039	-2.25893	0.023888	0.218953	43.4327	67.4939	54.8682	57.3121	143.132	31.7151	90.6065	224.687	193.806	151.634	243.926	145.198
ENSMUSG00000027006	Dnajc10	2068.64	-1.28649	0.161014	-2.25721	0.0239948	0.21956	1310.05	1772.64	1690.68	1678.1	2028.62	2141.32	2091.4	2040.83	2475.18	2096.3	3024.47	2474.06
ENSMUSG00000027502	Rtf2	4453.33	1.27191	0.153707	2.25751	0.0239765	0.21956	6215.92	5162.92	4712.15	4977.75	3941.63	4827.26	4170.38	3625.76	4193.13	4079.36	3390.36	4143.37
ENSMUSG00000042106	Inka1	141.27	-1.96381	0.432189	-2.25285	0.0242685	0.22169	80.805	52.6601	133.916	139.841	135.792	296.372	208.519	159.425	167.504	86.6483	80.9669	152.79
ENSMUSG00000061603	Akap6	62.3472	-15.8686	1.77002	-2.25313	0.0242507	0.22169	0	0	0	14.5191	56.8857	68.8983	34.7532	71.788	0	198.897	175.258	127.167
ENSMUSG00000056629	Fkbp2	104.738	-2.26459	0.523848	-2.25113	0.0243771	0.222121	20.2012	68.2356	51.1483	121.502	106.431	114.831	229.619	142.644	112.131	56.1244	135.286	98.6969
ENSMUSG00000042712	Tceal9	2809.84	-1.55551	0.283066	-2.25174	0.024339	0.222121	2455.46	1558.29	2619.72	2279.49	2543.34	4209.36	4368.97	2742.86	4050.55	2924.38	1725.93	2239.66
ENSMUSG00000051223	Bzw1	7275.67	1.22453	0.129803	2.25128	0.0243679	0.222121	9068.34	8200.89	7335.6	7241.96	5799.59	6896.4	6740.88	6570.94	6891.19	7023.43	7764.63	7774.28
ENSMUSG00000063605	Ccdc102a	602.06	1.70049	0.340485	2.2496	0.0244745	0.222318	540.383	467.266	1025.76	1153.88	596.382	545.719	321.467	410.217	333.623	573.06	660.034	596.926
ENSMUSG00000028800	Hdac1	3357.09	1.27612	0.156398	2.24918	0.0245013	0.222318	4458.41	3421.42	3903.08	4112.72	2732.35	3514.91	3203.5	3005.77	3285.01	3308.39	2517.15	2822.35
ENSMUSG00000031760	Mt3	15.863	-14.4504	1.71221	-2.25033	0.0244279	0.222318	0	0	0.929969	7.64161	8.2576	44.8386	43.4415	28.9017	51.2202	0	5.12449	0
ENSMUSG00000054414	Slc30a7	1928.51	-1.41333	0.221812	-2.25008	0.0244438	0.222318	1546.41	1338.75	1359.61	1461.84	1481.78	1859.16	2469.96	2255.26	2722.97	1596.1	2866.64	2183.67
ENSMUSG00000049848	Ceacam19	5.77913	51.4683	2.5278	2.24923	0.0244978	0.222318	17.1711	0	13.0196	9.16993	0	0	0	0	20.7649	0	9.22408	0
ENSMUSG00000045282	Tmem86b	159.686	-2.23163	0.515135	-2.24814	0.0245671	0.222728	37.3723	130.538	139.495	94.756	354.159	168.418	201.072	174.342	191.037	44.3088	169.108	211.629
ENSMUSG00000067158	Col4a4	4.80671	23.7258	2.03535	2.24452	0.0247987	0.22464	8.0805	1.48338	5.57981	3.05664	0	0	0	0	17.9963	16.7389	0	4.74504
ENSMUSG00000022575	Gsdmd	2532.78	1.27148	0.154455	2.24345	0.0248681	0.22508	3316.03	2676.77	2594.61	3496.04	2435.08	2529.55	2301.16	2237.55	1940.83	2336.55	2083.62	2445.59
ENSMUSG00000033880	Lgals3bp	4941.37	1.48307	0.253708	2.24111	0.0250187	0.226254	9739.02	7866.38	4111.39	4766.07	5446.35	3623.18	4334.22	4451.79	3345.92	3909.02	3934.58	3768.51
ENSMUSG00000021359	Tfap2a	8.98815	15.5736	1.76943	2.23859	0.0251823	0.227198	59.5937	7.41692	9.29969	18.3399	2.75253	3.28087	0	0	0	0	7.17428	0
ENSMUSG00000022544	Eef2kmt	446.188	1.34718	0.192038	2.23883	0.0251671	0.227198	532.303	463.557	530.082	678.575	364.252	400.267	462.962	410.217	351.619	358.409	398.685	403.329
ENSMUSG00000103749	Pcdhgb5	10.7121	-29.4176	2.17937	-2.23854	0.0251859	0.227198	0	0	0	0	18.3502	0	0	0	55.3731	12.8003	16.3984	25.6232
ENSMUSG00000057286	St6galnac2	243.941	2.12296	0.485315	2.23789	0.0252283	0.22739	638.359	482.1	208.313	298.023	153.224	88.5836	225.896	298.34	87.2127	256.991	83.0167	107.238
ENSMUSG00000054619	Mettl7a1	947.959	-1.42722	0.229707	-2.23418	0.0254715	0.229392	781.788	706.091	902.07	922.343	921.181	1538.73	1371.51	897.816	1041.02	724.695	827.092	741.176
NA	NA	53.3793	-3.07627	0.72607	-2.23282	0.0255611	0.230007	30.3019	23.7341	34.4089	19.8682	101.844	7.65537	55.8533	166.884	62.2948	20.6774	55.3445	61.6855
ENSMUSG00000023034	Nr4a1	20969.9	1.39116	0.213359	2.23233	0.0255935	0.230108	20730.5	19421.2	31045.2	30387.6	21582.6	14826.3	14710.5	21900	16913.7	19848.4	22107	18165.9
ENSMUSG00000038893	Fam117a	2428.64	-1.76711	0.368027	-2.23187	0.0256233	0.230185	680.782	852.946	3201.88	1961.6	2511.23	2987.78	3637.91	2698.11	2713.28	2766.84	2421.83	2709.42
ENSMUSG00000059839	Zfp874b	303.626	-1.47767	0.252595	-2.23012	0.0257392	0.230652	205.043	203.224	310.61	239.947	385.355	285.436	328.914	415.811	307.321	262.899	403.81	295.142
ENSMUSG00000022468	Endou	43.5272	-4.24657	0.935239	-2.23076	0.0256969	0.230652	48.483	5.19184	0	6.87745	64.2258	21.8725	103.018	66.1942	73.3694	45.2934	45.0955	42.7054
ENSMUSG00000061273	Mmgt1	612.321	-1.40854	0.221574	-2.23041	0.0257201	0.230652	461.598	514.734	411.976	379.024	670.701	581.808	451.792	783.142	755.843	701.063	936.757	699.419
ENSMUSG00000059248	Septin9	14.3827	-6.3282	1.19445	-2.22848	0.0258488	0.231404	0	1.48338	1.85994	10.6983	45.8756	5.46812	4.96474	33.5632	35.9925	14.7696	11.2739	6.64306
ENSMUSG00000050373	Snx21	364.892	1.67264	0.333058	2.22822	0.0258659	0.231404	340.391	350.82	502.183	774.095	256.903	380.581	353.738	186.462	347.466	338.716	227.527	319.816
ENSMUSG00000037820	Tgm2	7477.23	1.70956	0.347248	2.22789	0.0258881	0.231412	16359	13917.1	6019.69	5637.22	8586.07	4653.37	4424.83	6862.75	6556.18	7794.41	4079.09	4837.1
ENSMUSG00000012017	Scarf2	17.9376	-11.6806	1.59206	-2.22733	0.0259249	0.231551	0	6.67523	0	1.52832	47.7106	16.4044	0	33.5632	35.9925	0	29.722	43.6544
ENSMUSG00000024327	Slc39a7	161.809	-1.73468	0.356928	-2.22642	0.025986	0.231885	134.338	139.438	117.176	60.3687	194.512	177.167	203.554	206.973	271.328	126.034	147.585	163.229
ENSMUSG00000116564	Riok2	807.898	1.29198	0.166018	2.22613	0.0260052	0.231885	839.362	1027.98	850.922	844.398	650.516	680.234	625.557	800.856	822.291	737.495	931.632	883.527
ENSMUSG00000085795	Zfp703	10.8321	14.5408	1.73672	2.22375	0.0261651	0.232777	0	39.3097	8.36972	7.64161	3.67005	0	0	0	26.3022	26.5853	1.0249	17.0822
ENSMUSG00000004446	Bid	1006.35	1.34646	0.192968	2.22405	0.0261454	0.232777	1399.95	1166.68	1331.72	1251.7	926.687	1078.31	1145.61	675.926	675.552	785.742	812.744	825.637
ENSMUSG00000047712	Ust	333.167	1.52954	0.275711	2.22368	0.0261697	0.232777	399.985	442.79	381.287	349.222	327.552	214.35	237.066	248.927	240.873	290.469	512.449	353.031
ENSMUSG00000006179	Prss16	96.8397	-4.55879	0.984503	-2.2231	0.026209	0.232935	50.5031	2.22508	14.8795	71.067	99.0912	209.976	147.701	175.275	94.1343	0	143.486	153.739
ENSMUSG00000021182	Ccdc88c	2102.72	-1.64002	0.321247	-2.22169	0.026304	0.233222	882.794	1718.5	1731.6	920.05	2736.02	1116.59	2258.96	2503.26	2169.24	2286.33	4030.92	2878.34
ENSMUSG00000028179	Cth	36.9783	-3.30759	0.776795	-2.22167	0.0263059	0.233222	19.1912	9.64199	1.85994	32.0948	76.1534	15.3107	52.1298	64.3295	47.0672	60.063	44.0706	21.8272
ENSMUSG00000079657	Rab26	45.2665	-3.97933	0.896822	-2.22176	0.0262993	0.233222	12.1207	0	11.1596	38.9722	61.4733	79.8346	54.6122	52.2095	131.511	36.4317	43.0457	21.8272
ENSMUSG00000026628	Atf3	8770.56	1.41757	0.226763	2.22003	0.0264166	0.23344	8340.08	7726.94	13135.8	13965.8	6756.55	7091.06	9490.1	7116.34	8881.85	9015.36	7476.63	6250.17
ENSMUSG00000001105	Ift20	2397.97	-1.39363	0.21567	-2.22029	0.0263991	0.23344	1892.86	1587.96	2149.16	2465.18	2457.1	3337.74	3225.84	2262.72	3109.2	2156.36	1980.1	2151.4
ENSMUSG00000042379	Esm1	36.2907	-5.49941	1.10765	-2.22026	0.0264014	0.23344	0	28.1843	0	14.5191	87.1636	54.6812	59.5769	35.4279	101.056	20.6774	13.3237	20.8782
ENSMUSG00000027848	Olfml3	72.4137	-1.87207	0.407483	-2.22006	0.0264148	0.23344	41.4125	82.3278	42.7786	32.0948	78.906	91.8645	116.671	85.7727	74.7537	74.8326	83.0167	64.5326
NA	NA	62.6293	-2.6501	0.63347	-2.2196	0.026446	0.233509	7.07044	29.6677	43.7085	46.6138	40.3705	65.6175	157.631	74.585	99.6717	94.5254	38.9461	53.1445
ENSMUSG00000033918	Parl	2187.31	1.34772	0.194261	2.21618	0.0266792	0.234613	3198.87	2749.45	2389.09	2507.98	2129.54	2072.42	1905.22	1939.21	1693.03	2560.06	1519.92	1582.95
ENSMUSG00000057329	Bcl2	1080.7	-1.66799	0.332913	-2.21712	0.0266148	0.234613	758.557	833.662	464.055	371.382	1039.54	526.033	1007.84	1474.92	1262.51	1336.16	2127.69	1766.1
ENSMUSG00000021403	Serpinb9b	81.6559	3.80491	0.869634	2.21687	0.0266321	0.234613	230.294	133.505	141.355	171.172	26.6078	7.65537	35.9944	107.216	0	45.2934	65.5935	15.1841
ENSMUSG00000020638	Cmpk2	550.587	-1.54039	0.281237	-2.21628	0.0266724	0.234613	454.528	281.843	525.433	362.977	475.271	638.677	706.235	681.52	556.5	466.719	918.308	539.037
ENSMUSG00000051238	Swsap1	256.81	-1.57838	0.297061	-2.21653	0.0266553	0.234613	288.878	132.763	173.904	230.013	252.316	337.93	353.738	358.008	243.642	192.989	299.27	218.272
ENSMUSG00000052234	Epx	14.8695	-283.919	3.67974	-2.21465	0.0267843	0.234626	0	0	0	0	107.349	71.0856	0	0	0	0	0	0
ENSMUSG00000020482	Ccdc117	2329.83	-1.42147	0.229022	-2.21544	0.0267297	0.234626	1798.92	2000.34	1634.89	1286.85	2261.67	2103.04	2693.37	2495.8	2531.94	1939.74	3318.62	3892.83
ENSMUSG00000042705	Commd10	1094.18	1.41702	0.227049	2.21475	0.0267775	0.234626	1283.79	1111.8	1320.56	1785.08	916.594	1028.01	1115.83	823.232	1023.02	1221.94	716.403	783.881
ENSMUSG00000093061	Mir5098	6.52104	45.7218	2.48994	2.21484	0.026771	0.234626	19.1912	9.64199	0	6.11329	0	0	0	0	29.0709	0	0	14.2351
ENSMUSG00000063714	Sp3os	151.095	-2.36736	0.561406	-2.21458	0.026789	0.234626	25.2516	110.512	116.246	131.436	100.009	296.372	281.749	231.213	185.5	158.527	138.361	37.9603
ENSMUSG00000060675	Plaat3	91.4288	-2.41748	0.575321	-2.21355	0.0268595	0.235053	21.2113	77.1359	46.4985	87.1144	34.8654	193.572	158.872	175.275	92.75	92.5561	46.1204	71.1756
ENSMUSG00000071649	B3gat3	1799.83	-1.4655	0.249191	-2.21275	0.0269146	0.235179	1268.64	983.483	1944.57	1985.29	1662.53	2385.2	2682.2	2330.78	1776.09	1456.28	1342.62	1780.34
ENSMUSG00000020064	Herc4	6.51315	75.333	2.8179	2.21271	0.0269173	0.235179	0	45.2432	0	12.2266	0	0	0	0	0	0	10.249	10.4391
ENSMUSG00000034573	Ptpn13	175.805	-2.08455	0.479082	-2.21201	0.0269657	0.235412	99.9962	143.147	92.9969	100.869	192.677	56.8685	418.28	244.266	149.507	173.297	170.133	267.62
ENSMUSG00000070939	Tgfbrap1	4.93954	-79.1405	2.85272	-2.21065	0.0270603	0.235669	0	0	0	0	10.0926	18.5916	21.1002	0	0	0	0	9.49008
ENSMUSG00000005640	Insrr	8.68232	69.9678	2.77198	2.21092	0.0270414	0.235669	53.5333	0	0	0	0	0	0	0	24.9179	0	14.3486	11.3881
ENSMUSG00000027649	Ctnnbl1	1819.75	1.30299	0.172691	2.21102	0.0270344	0.235669	2692.83	1910.6	2043.14	2041.84	1390.95	1830.73	1839.44	1607.31	1837	1667.98	1513.77	1461.47
ENSMUSG00000038048	Cntnap5c	6.3661	22.5897	2.03513	2.20998	0.0271068	0.235883	32.322	17.8006	4.64985	18.3399	0	3.28087	0	0	0	0	0	0
ENSMUSG00000049307	Fut4	638.578	-1.32847	0.185483	-2.20918	0.027162	0.236175	493.92	495.45	408.256	464.61	587.207	588.37	616.869	681.52	804.295	719.771	1057.69	744.972
ENSMUSG00000044177	Wfikkn2	38.4479	-4.49449	0.981622	-2.20875	0.0271922	0.236247	0	31.1511	6.50978	6.87745	22.9378	17.498	40.9591	120.268	92.75	47.2627	15.3735	59.7875
ENSMUSG00000086610	Gm15408	9.69025	-63.1142	2.70791	-2.2083	0.0272231	0.236326	0	0	0	0	31.1954	0	0	8.39081	66.4478	0	10.249	0
ENSMUSG00000019579	Mydgf	2123.67	-1.39932	0.219651	-2.2068	0.0273282	0.237049	2197.9	1674.74	1600.48	1840.86	1948.79	2983.41	2877.07	2425.88	2645.45	1669.95	1512.75	2106.8
ENSMUSG00000030789	Itgax	6935.99	1.51789	0.272918	2.20604	0.0273814	0.23732	9288.53	10506.1	5975.05	7593.47	7983.27	5327.05	2884.52	5783.13	6028.75	6253.44	8283.22	7325.4
ENSMUSG00000068220	Lgals1	4608.88	-1.49181	0.261781	-2.2044	0.0274964	0.238126	5245.25	3729.23	3182.35	4344.26	4583.89	7096.53	8402.83	4534.77	4359.25	4271.37	2452.58	3104.21
ENSMUSG00000074006	Omp	22.9638	-12.0824	1.63111	-2.20392	0.0275299	0.238226	0	0	0.929969	12.9907	11.9276	38.2769	53.371	66.1942	0	59.0784	32.7967	0
ENSMUSG00000026938	Fcna	13505	2.28298	0.540485	2.20343	0.0275647	0.238316	38805.6	25923.6	13323.7	14377.7	12268	8416.53	8929.09	10872.6	7908.67	14568.7	2295.77	4370.18
ENSMUSG00000023915	Tnfrsf21	1499.92	1.46894	0.251809	2.20315	0.0275843	0.238316	2383.75	2241.39	1359.61	1253.99	1495.54	1149.4	1053.77	1227.85	1205.75	1907.25	1421.53	1299.19
ENSMUSG00000029648	Flt1	214.476	1.6795	0.339803	2.20137	0.02771	0.239212	223.224	365.654	196.223	194.097	191.76	96.239	106.742	187.395	256.101	255.022	297.22	204.037
ENSMUSG00000047592	Nxpe5	198.454	2.23245	0.526409	2.20101	0.0277355	0.23924	646.44	298.16	220.403	189.512	133.957	68.8983	206.037	197.65	142.586	171.327	40.9959	65.4816
ENSMUSG00000025736	Jmjd8	949.674	-1.50955	0.270142	-2.19928	0.0278582	0.240108	941.378	534.018	554.262	781.737	889.069	1145.02	1331.79	878.238	1539.37	778.85	1012.6	1009.74
ENSMUSG00000033685	Ucp2	48139.4	1.28893	0.166638	2.19745	0.0279885	0.240657	64622.8	54693.1	47328	64016.1	50281.5	46183.8	43189.5	39298.8	39247.1	51586.2	35719.7	41505.8
ENSMUSG00000051627	H1f4	77.1721	-2.28701	0.543006	-2.19789	0.0279573	0.240657	26.2616	40.793	33.4789	110.803	79.8235	99.5198	207.278	98.8251	76.1381	42.3395	48.1702	62.6346
NA	NA	268.847	-1.63658	0.323384	-2.19764	0.0279745	0.240657	182.821	127.571	250.162	237.654	296.356	409.016	292.92	307.663	308.705	156.558	295.171	361.572
ENSMUSG00000074733	Zfp950	78.2457	-2.52202	0.607718	-2.19605	0.0280883	0.240721	50.5031	25.2175	39.9887	14.5191	162.4	22.9661	42.2003	98.8251	120.437	103.387	158.859	99.6459
ENSMUSG00000031681	Smad1	400.54	1.4267	0.233485	2.19579	0.0281071	0.240721	363.622	486.55	385.937	478.365	326.634	247.159	245.755	381.316	532.966	479.519	498.1	380.552
ENSMUSG00000021094	Dhrs7	2265.83	-1.44877	0.24352	-2.19623	0.0280757	0.240721	2585.76	1652.49	1564.21	1608.56	2390.12	2923.26	2884.52	2537.75	3326.54	2194.76	1771.02	1750.92
ENSMUSG00000022774	Ncbp2	1638.4	1.25843	0.150988	2.19634	0.0280674	0.240721	2175.67	1796.38	1725.09	2141.94	1558.85	1697.31	1656.98	1317.36	1495.07	1346.99	1421.53	1327.66
ENSMUSG00000002820	Atg4d	1362.67	-1.40121	0.221593	-2.19627	0.0280726	0.240721	846.432	936.015	1560.49	1259.34	1345.99	1607.63	1782.34	1713.59	1489.54	1157.94	1157.11	1495.64
ENSMUSG00000037072	Selenof	9912.82	-1.41257	0.227171	-2.19361	0.0282638	0.241872	9726.9	7060.16	8023.77	8154.36	9244.84	14292.6	13842.9	9186.07	13751.9	9346.2	7423.33	8900.75
ENSMUSG00000036427	Gpi1	12835.7	1.29819	0.171824	2.19117	0.0284394	0.243183	19665.9	13795.5	12609.5	16233.1	11364.3	13693.3	11674.6	11260.5	10169.3	11915.1	9497.73	12150.2
ENSMUSG00000031613	Hpgd	3642.61	1.66848	0.337618	2.18749	0.0287065	0.245273	7508.8	5697.68	3674.31	4025.6	3052.56	2853.27	2766.6	3856.97	2522.25	4584.48	1230.9	1937.88
ENSMUSG00000016831	Tox4	3125.35	1.31599	0.181169	2.18665	0.0287681	0.245412	3419.06	3945.8	2706.21	2951.19	3069.99	2232.09	2296.19	2296.28	3451.13	3159.71	4230.78	3745.74
ENSMUSG00000028743	Akr7a5	1289.19	1.36751	0.206496	2.18673	0.0287623	0.245412	1434.29	1243.08	1765.08	1983.76	998.252	1396.56	1186.57	1118.77	1320.65	968.885	920.358	1134.06
ENSMUSG00000030122	Ptms	10148.7	1.25259	0.148734	2.18453	0.0289234	0.246543	12211.7	11792.2	10451.9	13881.8	10748.6	10261.5	9154.98	8425.3	8545.46	10063	7846.62	8401.57
ENSMUSG00000047281	Sfn	509.186	-1.73247	0.363069	-2.18368	0.0289859	0.246881	513.112	427.956	337.579	156.653	804.657	557.749	623.075	499.719	789.067	635.092	342.316	423.258
ENSMUSG00000026712	Mrc1	4855.63	1.93592	0.436683	2.18241	0.0290793	0.247288	11936.9	9659.79	3069.83	2593.56	3804	2036.33	2937.89	5302.06	3247.63	6934.82	3577.92	3166.84
ENSMUSG00000036928	Stag3	20.6536	8.7265	1.43199	2.18255	0.0290688	0.247288	21.2113	8.9003	75.3275	73.3595	11.9276	6.56175	0	1.86462	0	37.4163	11.2739	0
ENSMUSG00000018143	Mafk	2607.54	1.3326	0.189893	2.18144	0.0291505	0.247655	3136.24	3361.35	2958.23	2622.6	2566.28	2682.66	1808.41	2005.4	2537.47	3121.31	2445.41	2045.11
ENSMUSG00000035459	Stab2	1436.3	1.68899	0.346708	2.18096	0.0291861	0.247655	3107.96	2585.54	1189.43	1209.67	1663.45	795.065	1030.18	1301.51	1118.54	1560.65	839.391	834.178
ENSMUSG00000062470	Fbxl12os	25.883	-3.98025	0.913779	-2.1809	0.029191	0.247655	0	8.15861	10.2297	16.8115	18.3502	38.2769	55.8533	28.9017	49.8358	55.1398	20.498	8.54108
ENSMUSG00000042548	Asxl1	1707.06	-1.49929	0.267992	-2.18019	0.0292431	0.247903	1139.35	1345.43	1071.32	743.529	2188.26	1190.96	1277.18	1788.17	3160.42	1676.84	2662.68	2240.61
ENSMUSG00000034472	Rasd2	11.7545	25.3786	2.141	2.17913	0.0293216	0.24818	33.3321	24.4758	0	14.5191	2.75253	0	0	0	0	15.7542	50.22	0
ENSMUSG00000097321	1700028E10Rik	5.04933	79.2968	2.89493	2.1794	0.0293023	0.24818	27.2717	0	11.1596	22.1607	0	0	0	0	0	0	0	0
ENSMUSG00000067370	B3galt4	352.1	-1.56037	0.294704	-2.17809	0.0293996	0.248646	424.226	224.733	215.753	200.21	395.447	393.705	495.233	375.722	484.515	386.963	339.241	289.448
ENSMUSG00000030339	Ltbr	693.421	1.63829	0.327099	2.17729	0.0294586	0.248951	1275.71	731.308	810.933	932.277	794.565	784.129	290.437	418.608	419.452	677.432	550.37	635.836
ENSMUSG00000073412	Lst1	1711.01	1.68358	0.345388	2.1759	0.029563	0.24955	3636.22	2838.45	1824.6	2204.6	1519.4	1649.19	1623.47	1446.95	883.202	1768.41	432.507	705.113
ENSMUSG00000027519	Rab22a	1376.19	-1.37603	0.211657	-2.17573	0.0295756	0.24955	1112.08	1184.48	1004.37	1360.97	1480.86	1703.87	1951.14	1281.93	1832.85	1194.37	1124.31	1283.06
ENSMUSG00000020935	Dcakd	200.117	-1.7106	0.35623	-2.17417	0.0296921	0.250338	98.9861	126.829	171.114	233.833	243.141	182.635	379.803	275.032	146.739	157.542	236.751	148.994
ENSMUSG00000029033	Acap3	561.719	-1.73652	0.366544	-2.17218	0.0298423	0.251409	164.64	424.989	610.06	398.892	912.924	383.862	897.377	582.695	541.272	508.074	673.358	642.479
ENSMUSG00000062007	Hsh2d	222.429	1.81213	0.395029	2.17121	0.0299154	0.251829	432.307	370.104	178.554	226.192	110.101	94.0517	219.69	242.401	232.567	174.281	163.984	224.915
ENSMUSG00000001783	Rtcb	8828.57	1.30895	0.179026	2.16957	0.0300394	0.252676	12281.3	9176.95	9517.3	11211	7296.05	10164.1	8018.06	6751.8	8541.31	8923.79	6608.54	7452.56
ENSMUSG00000041362	Shtn1	292.95	1.67364	0.34251	2.16925	0.0300638	0.252685	369.683	546.627	272.481	272.041	299.109	185.916	217.207	170.613	188.269	255.022	424.308	314.122
ENSMUSG00000022401	Xpnpep3	7.5808	-64.7693	2.77667	-2.16707	0.0302296	0.253017	0	0	0	0	0	19.6852	21.1002	0	20.7649	0	0	29.4193
ENSMUSG00000002108	Nr1h3	6.52121	72.6717	2.85204	2.16803	0.0301561	0.253017	0	11.1254	0	44.3213	0	0	0	0	0	18.7081	4.09959	0
ENSMUSG00000037185	Krt80	352.817	1.55027	0.291898	2.16693	0.0302403	0.253017	493.92	473.941	357.108	482.95	375.262	261.376	161.354	366.399	375.153	346.593	278.772	260.977
ENSMUSG00000039810	Zc3h10	992.573	1.38858	0.218599	2.16658	0.0302667	0.253017	1252.48	766.168	1353.11	1190.56	745.019	819.125	814.218	906.207	1021.63	988.578	796.346	1257.44
ENSMUSG00000037907	Ankrd13b	4.9328	-36.5068	2.39546	-2.16664	0.0302624	0.253017	0	0	0	0.764161	8.2576	0	6.20593	23.3078	12.459	0	8.19918	0
ENSMUSG00000077604	Snord1b	5.07244	79.7562	2.91455	2.16758	0.0301907	0.253017	0	16.3172	5.57981	38.9722	0	0	0	0	0	0	0	0
ENSMUSG00000097814	Panct2	31.7504	-8.6506	1.43557	-2.16834	0.030133	0.253017	0	0	0	9.9341	44.0405	0	35.9944	7.4585	121.821	27.5699	107.614	26.5722
NA	NA	5.11369	80.2719	2.92068	2.16622	0.0302946	0.253054	42.4226	9.64199	9.29969	0	0	0	0	0	0	0	0	0
ENSMUSG00000048486	Fitm2	79.0958	-2.1481	0.50968	-2.16423	0.0304468	0.253934	55.5534	21.5091	70.6777	38.9722	132.122	88.5836	85.6418	93.2312	156.429	46.2781	99.4151	60.7365
ENSMUSG00000034738	Nostrin	421.022	1.49827	0.269516	2.16425	0.0304454	0.253934	500.991	463.557	569.141	778.68	336.727	532.595	273.061	400.894	245.026	298.346	350.515	302.734
ENSMUSG00000070369	Itgad	5982.72	1.86201	0.41447	2.16387	0.030474	0.253966	16488.3	11316.7	4539.18	3886.52	6248.25	3199.95	3469.11	6539.24	4082.38	6253.44	2454.63	3314.89
ENSMUSG00000020075	Ddx21	5941.52	1.34144	0.19604	2.16172	0.0306395	0.255148	8569.37	6700.44	5313.84	5054.93	4839.87	4980.37	4120.74	5169.67	6178.26	5503.15	7323.92	7543.67
ENSMUSG00000003206	Ebi3	853.315	1.37918	0.214598	2.1613	0.0306724	0.255227	1138.34	1232.69	733.746	1224.95	897.326	662.736	783.188	796.194	782.146	769.988	627.237	591.232
ENSMUSG00000029032	Arhgef16	6.37065	-72.6113	2.86153	-2.16042	0.03074	0.255593	0	0	0	0	0	10.9362	27.3061	7.4585	0	0	30.7469	0
ENSMUSG00000028955	Vamp3	2974.53	1.22939	0.13794	2.15994	0.030777	0.255704	2924.13	3088.4	3412.06	3411.22	2374.52	2801.87	2826.18	2440.79	2897.4	3528.95	3147.46	2841.33
ENSMUSG00000038718	Pbx3	5.73996	-72.8945	2.86707	-2.15821	0.0309115	0.256624	0	0	0	0	0	19.6852	0	26.1047	0	11.8157	11.2739	0
ENSMUSG00000034751	Mast4	705.858	-1.82291	0.401524	-2.15739	0.0309752	0.256956	177.771	619.313	263.181	256.758	910.171	459.322	417.038	615.326	1486.77	674.478	1644.96	945.212
ENSMUSG00000020481	Ankrd36	5.43097	-75.0234	2.88935	-2.15594	0.031088	0.257695	0	0	0	0	0	20.7789	12.4119	13.9847	17.9963	0	0	0
ENSMUSG00000050555	Hyls1	218.096	-1.59711	0.313402	-2.15526	0.0311411	0.257741	258.576	105.32	131.126	154.361	241.305	276.687	289.196	228.416	283.787	232.375	222.403	193.598
ENSMUSG00000032198	Dock6	247.67	-1.94478	0.445233	-2.1553	0.0311383	0.257741	133.328	169.106	163.675	114.624	548.672	85.3027	260.649	234.01	322.549	234.344	419.183	286.601
ENSMUSG00000017756	Slc12a7	5.53921	-75.1239	2.89357	-2.15347	0.031282	0.25871	0	0	0	0	24.7728	0	0	22.3755	5.53731	13.785	0	0
ENSMUSG00000095028	Sirpb1b	164.476	1.97905	0.457396	2.15307	0.031313	0.258768	336.351	302.61	171.114	206.324	150.472	115.924	91.8477	154.764	91.3657	195.943	120.938	36.0623
ENSMUSG00000079492	Gm11127	64.3376	-3.50826	0.841432	-2.15199	0.031398	0.259273	25.2516	19.284	56.7281	26.7456	71.5659	63.4302	304.09	10.2554	37.3769	8.86175	69.693	78.7677
ENSMUSG00000026357	Rgs18	389.648	1.64631	0.334378	2.15098	0.0314781	0.259736	240.395	514.734	712.356	659.471	326.634	396.986	296.643	272.235	225.646	421.426	307.469	301.785
ENSMUSG00000016559	H3f3b	48556.2	-1.40876	0.229901	-2.1506	0.0315075	0.259781	42896.3	31401.7	41494.3	43001.6	41533	62890	65863.5	53416.8	72061.2	50900	37436.4	39779.6
ENSMUSG00000030058	Copg1	5038.69	-1.28639	0.169025	-2.14957	0.0315896	0.26026	4765.47	4177.21	3545.04	3347.79	5061.91	4619.47	5288.69	5399.02	6030.14	4779.44	6674.13	6775.92
ENSMUSG00000070336	Fbxo47	35.2215	-3.67892	0.874567	-2.14882	0.0316491	0.260448	22.2214	0	28.829	4.58497	44.9581	37.1832	54.6122	66.1942	33.2239	63.0169	31.7718	36.0623
ENSMUSG00000053166	Cdh22	15.3503	4.46994	1.00539	2.14867	0.0316605	0.260448	18.1811	22.9924	53.0082	9.9341	7.34009	9.84262	6.20593	0	11.0746	17.7235	5.12449	22.7762
ENSMUSG00000058297	Spock2	139.98	-1.92319	0.439285	-2.14781	0.0317288	0.260812	47.4729	69.719	93.9269	145.191	235.8	121.392	147.701	180.869	192.422	162.466	76.8673	205.935
ENSMUSG00000028392	Bspry	30.3502	-4.7966	1.05518	-2.14372	0.0320555	0.263098	0	17.0589	17.6694	11.4624	40.3705	59.0557	70.7476	52.2095	0	45.2934	13.3237	37.0113
ENSMUSG00000037295	Ldlrap1	1026.31	-1.4217	0.236771	-2.14392	0.0320395	0.263098	736.335	687.548	1088.99	754.227	1161.57	1035.66	1321.86	1125.3	1377.41	719.771	1268.82	1038.22
ENSMUSG00000034171	Faah	6.9013	-106.183	3.14177	-2.14224	0.0321744	0.263874	0	0	0	0	27.5253	0	0	39.1571	0	0	0	16.1331
ENSMUSG00000035877	Zhx3	107.377	-2.08387	0.494585	-2.14172	0.0322156	0.264012	80.805	24.4758	79.9773	19.8682	127.534	102.801	89.3654	105.351	134.28	116.187	215.229	192.649
ENSMUSG00000037638	Zbtb42	349.784	-1.85272	0.415471	-2.14129	0.0322508	0.264013	229.284	315.961	176.694	174.229	483.529	285.436	637.969	254.521	768.302	335.762	301.32	234.405
ENSMUSG00000034796	Cpne7	203.204	-2.51563	0.6216	-2.14112	0.0322644	0.264013	164.64	51.1767	32.5489	219.314	146.802	326.994	435.656	267.574	44.2985	159.512	290.046	299.887
ENSMUSG00000063931	Pepd	2044.11	1.31334	0.183721	2.14042	0.0323212	0.264078	3232.2	2386.02	2091.5	2418.57	2124.04	2228.81	1568.86	1788.17	1573.98	1861.95	1602.94	1652.22
ENSMUSG00000029090	Adgra3	37.8343	4.50564	1.01452	2.14064	0.032303	0.264078	32.322	48.9517	12.0896	25.9815	11.0101	1.09362	0	13.9847	5.53731	109.295	130.162	63.5836
ENSMUSG00000086316	Nbdy	588.858	1.48927	0.268638	2.13896	0.0324386	0.264838	964.609	617.829	683.527	1001.05	558.764	662.736	520.057	452.171	361.31	568.137	274.673	401.431
ENSMUSG00000022234	Cct5	70.6913	2.11411	0.505288	2.13749	0.0325578	0.265611	164.64	72.6858	103.227	65.7179	43.123	41.5577	73.2299	34.4955	27.6866	88.6175	57.3943	75.9207
ENSMUSG00000054342	Kcnn4	10.2473	-10.7751	1.60497	-2.13688	0.0326078	0.265818	0	5.19184	0	0	13.7627	13.1235	31.0296	0	23.5336	16.7389	8.19918	11.3881
ENSMUSG00000074754	Smim26	336.939	-1.6793	0.350136	-2.13591	0.0326866	0.26586	250.495	212.866	277.131	337.759	313.789	590.557	471.65	435.39	481.746	309.177	194.731	167.974
ENSMUSG00000067613	Krt83	139.53	-2.20885	0.535148	-2.13641	0.032646	0.26586	147.469	75.6526	96.7168	103.162	369.757	298.56	120.395	144.508	16.6119	107.326	110.689	83.5127
ENSMUSG00000056035	Cyp3a11	6.90482	75.0624	2.91638	2.13621	0.0326621	0.26586	55.5534	0	1.85994	0	0	0	0	0	9.6903	15.7542	0	0
ENSMUSG00000009145	Dqx1	92.5178	-2.001	0.468596	-2.13557	0.0327143	0.265887	30.3019	98.645	75.3275	81.0011	155.059	121.392	95.5713	199.515	44.2985	40.3702	87.1163	81.6147
ENSMUSG00000047514	Tspyl1	2937.48	1.20754	0.127509	2.1337	0.0328671	0.266928	3524.11	3155.16	3083.78	2709.72	2457.1	2480.34	2693.37	2697.18	3026.14	3086.84	3339.12	2996.97
ENSMUSG00000058672	Tubb2a	2143.66	1.38369	0.219647	2.13305	0.0329209	0.267165	2392.84	2320.75	2729.46	3369.95	1868.05	2116.16	1998.31	1832.93	1621.05	2490.15	1224.75	1759.46
ENSMUSG00000077450	Rab11b	2495.61	1.1801	0.112107	2.13109	0.033082	0.268079	2781.71	2833.26	2617.86	2705.13	2458.01	2392.85	2116.22	2300.01	2289.68	2502.95	2416.71	2532.9
ENSMUSG00000068742	Cry2	177.77	-1.55255	0.297803	-2.13107	0.0330831	0.268079	123.228	102.353	97.6468	102.398	218.368	161.856	100.536	178.072	217.34	302.284	251.1	278.059
ENSMUSG00000008140	Emc10	12.0859	8.31171	1.43637	2.12699	0.033421	0.270475	16.161	22.9924	22.3193	12.2266	6.42258	1.09362	1.24119	0	1.38433	32.4931	28.6971	0
ENSMUSG00000036896	C1qc	11749.9	1.77668	0.389876	2.1268	0.033437	0.270475	30965.5	19057	11042.5	12526.9	11198.2	8810.24	9603.05	11808.7	6035.67	12647.7	2669.86	4634.01
ENSMUSG00000026526	Fh1	2571.52	1.34108	0.199094	2.1266	0.0334536	0.270475	3235.23	2469.09	3576.66	3554.11	1870.81	3069.8	2071.54	2558.26	2026.66	2356.24	1839.69	2230.17
ENSMUSG00000040383	Aqr	242.58	-1.75487	0.381666	-2.12585	0.0335157	0.270775	143.429	134.246	191.574	197.154	195.43	200.133	333.879	440.051	145.354	208.744	342.316	378.654
ENSMUSG00000039830	Olig2	6.01853	26.9609	2.23634	2.12526	0.0335653	0.270973	0	11.1254	5.57981	3.82081	0	0	0	0	0	34.4624	2.0498	15.1841
ENSMUSG00000031662	Snx20	4358.84	1.38784	0.222616	2.12401	0.0336694	0.271611	5926.03	4272.89	5232.94	6393.74	4733.44	5101.76	2860.93	3029.08	3449.75	4366.88	3313.49	3625.21
ENSMUSG00000097318	1700007L15Rik	130.065	-2.28708	0.562359	-2.12233	0.0338104	0.272546	73.7345	27.4426	101.367	89.4069	131.204	222.006	187.419	126.794	293.478	148.681	35.8714	123.371
ENSMUSG00000090439	Gm17455	4.85038	-72.7511	2.91486	-2.12185	0.0338503	0.272665	0	0	0	0	17.4327	10.9362	17.3766	0	12.459	0	0	0
ENSMUSG00000020894	Vamp2	1700.42	-1.43747	0.246847	-2.12086	0.0339339	0.273135	869.664	1541.24	1569.79	1639.89	2386.45	1493.89	2379.35	1821.74	2140.17	1662.07	1508.65	1392.2
ENSMUSG00000041632	Mrps27	686.467	1.36998	0.214205	2.12018	0.0339911	0.273393	691.893	766.909	919.739	1032.38	620.238	762.256	614.387	494.125	465.134	648.877	593.416	628.244
ENSMUSG00000017677	Wsb1	1344.95	1.3297	0.193961	2.11953	0.034046	0.273478	1464.59	1415.15	1374.49	1660.52	1284.52	1177.83	840.283	1143.95	1338.65	1861.95	1319.04	1258.39
ENSMUSG00000010307	Tmem86a	678.726	1.79045	0.396482	2.11945	0.0340523	0.273478	1673.67	1152.59	675.158	639.603	645.928	471.352	507.645	687.114	466.519	753.249	233.677	238.201
ENSMUSG00000053317	Sec61b	6435.68	-1.44706	0.251772	-2.11748	0.0342194	0.274617	5510.9	4744.6	5204.11	6219.51	6038.14	9782.47	9325.03	6226.91	9059.05	6018.12	4118.04	4981.34
ENSMUSG00000020780	Srp68	3550.92	-1.33708	0.197992	-2.11666	0.0342886	0.274863	3576.63	2544.74	2338.87	2757.86	3294.78	4180.93	3802.99	3719.92	4417.39	2958.84	4058.59	4959.52
ENSMUSG00000027580	Helz2	4455.6	-1.80491	0.402513	-2.11652	0.0343008	0.274863	1598.93	4901.84	2208.68	1452.67	8319.08	2742.81	3011.12	4269.06	6964.56	3837.14	8179.71	5981.6
ENSMUSG00000001962	Fam50a	2245.23	1.25209	0.15332	2.11546	0.0343912	0.275384	2902.92	2636.71	2362.12	2702.84	2004.76	2437.69	2172.07	1856.23	2267.53	1973.22	1698.26	1928.38
ENSMUSG00000028602	Tnfrsf8	44.2662	-2.41512	0.601675	-2.11425	0.0344938	0.276001	15.1509	40.0514	33.4789	12.2266	72.4834	84.2091	59.5769	27.9694	71.9851	51.2012	28.6971	34.1643
ENSMUSG00000030087	Klf15	44.0963	2.77026	0.695952	2.11224	0.0346654	0.27717	105.046	60.077	20.4593	61.1329	6.42258	33.9024	28.5473	20.5109	42.9142	91.5715	34.8465	23.7252
NA	NA	6.06906	23.9877	2.17106	2.11152	0.034728	0.277465	7.07044	7.41692	0	3.82081	0	0	0	0	9.6903	32.4931	0	12.3371
ENSMUSG00000030717	Nupr1	77.6905	-2.15724	0.52558	-2.1104	0.0348235	0.278024	54.5434	29.6677	43.7085	74.1236	105.514	167.325	109.224	54.0741	78.9067	127.018	50.22	37.9603
ENSMUSG00000034863	Ano8	406.131	-1.45468	0.256296	-2.1097	0.0348845	0.278101	226.254	282.585	366.408	411.119	537.662	382.769	501.439	450.307	440.216	335.762	403.81	535.241
ENSMUSG00000025967	Eef1b2	57654.3	1.42801	0.24361	2.10995	0.0348627	0.278101	85707.8	63571.1	66650.9	91014.7	42262.4	71571.2	54960.9	46152.2	48732.5	55454.9	26640.2	39132.4
ENSMUSG00000038215	Cep44	447.92	-1.46451	0.261093	-2.10813	0.0350197	0.278968	384.834	235.116	392.447	417.996	349.572	611.336	558.533	575.237	542.657	446.042	468.378	392.889
ENSMUSG00000032487	Ptgs2	741.567	1.76382	0.388409	2.10784	0.0350448	0.278968	487.86	721.666	1449.82	925.399	594.547	389.33	369.873	677.791	647.866	859.59	1364.14	410.921
ENSMUSG00000062373	Tmem65	1317.15	1.48927	0.272684	2.10721	0.0350995	0.279198	2231.23	2081.19	1164.32	1075.17	1221.21	778.661	1359.1	1040.46	996.717	1375.54	1224.75	1257.44
ENSMUSG00000058794	Nfe2	26.5398	-5.00022	1.10232	-2.10646	0.0351646	0.279511	0	20.7674	7.43975	4.58497	41.288	63.4302	40.9591	19.5786	40.1455	64.9862	14.3486	0.949008
ENSMUSG00000019792	Trmt11	12.653	-7.45194	1.37594	-2.10592	0.0352113	0.279677	0	5.93353	5.57981	0	9.17511	15.3107	31.0296	30.7663	16.6119	0	18.4482	18.9802
ENSMUSG00000063632	Sox11	17.7839	6.96288	1.33039	2.1044	0.0353434	0.28011	50.5031	31.8927	60.448	16.8115	0	2.18725	0	20.5109	1.38433	22.6467	5.12449	1.89802
ENSMUSG00000098557	Kctd12	20134.6	-1.47264	0.265305	-2.10478	0.0353102	0.28011	12523.8	18520	11077.8	10163.3	29450.3	13528.1	15955.4	18062.6	32659.1	22257.8	33035.5	24381.9
ENSMUSG00000112980	D430020J02Rik	77.0907	-2.60225	0.655621	-2.1045	0.0353345	0.28011	7.07044	38.568	52.0783	41.2647	157.812	97.3326	43.4415	63.3972	41.5299	145.727	174.233	62.6346
ENSMUSG00000016534	Lamp2	1327.5	1.37104	0.216383	2.104	0.0353784	0.280183	2033.26	1781.54	1245.23	1148.53	1094.59	1143.93	971.848	1316.42	1353.87	1112.64	1470.73	1257.44
ENSMUSG00000029070	Mxra8	64.2841	-2.93476	0.738544	-2.10311	0.0354558	0.280591	23.2314	4.45015	67.8877	29.8023	50.4631	112.643	85.6418	118.404	16.6119	75.8172	134.262	52.1955
ENSMUSG00000062070	Pgk1	6801.4	1.24602	0.151101	2.10007	0.0357224	0.282379	9451.15	7778.86	6552.56	8553.26	5970.25	7038.57	6622.97	6320.14	6402.52	6200.27	5184.96	5541.26
ENSMUSG00000072235	Tuba1a	2152.94	1.38324	0.222888	2.09994	0.0357339	0.282379	3419.06	1929.14	2229.14	2969.53	1836.86	2165.38	1915.15	1707.06	1820.39	2012.6	1420.51	2410.48
ENSMUSG00000029075	Tnfrsf4	948.839	-1.67694	0.355366	-2.09878	0.0358364	0.282983	344.431	685.323	917.88	1063.71	1044.13	1363.75	1418.68	1225.06	564.806	1310.56	494.001	953.753
ENSMUSG00000022174	Dad1	1768.77	-1.5285	0.291932	-2.09677	0.0360143	0.28418	1592.87	981.258	1429.36	1668.93	1463.43	2494.56	2765.36	1947.6	2429.5	2035.25	1025.92	1391.25
ENSMUSG00000032333	Stoml1	28.2426	-5.36665	1.15668	-2.09568	0.0361108	0.284734	0	0	29.759	2.29248	56.8857	62.3366	32.2708	19.5786	26.3022	44.3088	47.1453	18.0312
ENSMUSG00000036412	Arsi	41.6781	6.71665	1.31195	2.0944	0.0362245	0.284815	152.519	129.796	66.9578	34.3873	51.3806	5.46812	0	0	29.0709	0	15.3735	15.1841
ENSMUSG00000026480	Ncf2	3277.57	1.41102	0.237103	2.09505	0.0361662	0.284815	6610.86	3982.88	3183.28	3485.34	3123.21	2989.97	2837.35	3281.74	2678.68	2910.59	1821.24	2425.67
ENSMUSG00000026581	Sell	150.538	2.13765	0.523191	2.09489	0.0361812	0.284815	331.3	140.921	217.613	149.776	29.3604	114.831	193.625	55.9387	153.66	155.573	90.191	173.669
ENSMUSG00000051652	Lrrc3	256.218	1.75774	0.388526	2.09438	0.0362262	0.284815	238.375	368.621	276.201	450.855	285.346	158.576	160.113	154.764	268.56	248.129	359.739	105.34
ENSMUSG00000038418	Egr1	3430.68	-1.70992	0.369593	-2.094	0.0362596	0.28487	1055.51	2014.43	3336.73	3070.4	3723.26	1940.09	6300.26	4242.95	3275.32	2947.03	5689.21	3573.02
ENSMUSG00000030114	Klrg1	214.24	-1.84834	0.423518	-2.09255	0.0363892	0.285475	161.61	88.2613	246.442	236.126	337.644	341.211	377.32	297.408	66.4478	104.372	229.577	84.4617
ENSMUSG00000021710	Nln	466.843	1.65951	0.349204	2.09264	0.0363811	0.285475	646.44	895.222	383.147	336.231	367.922	238.41	274.302	481.073	339.16	512.012	587.266	540.935
ENSMUSG00000046550	Spin2c	48.1953	-2.58603	0.655236	-2.09198	0.0364404	0.285669	24.2415	11.8671	29.759	21.3965	31.1954	107.175	26.0649	60.6003	87.2127	112.249	27.6722	38.9093
ENSMUSG00000045362	Tnfrsf26	188.9	1.6204	0.332959	2.09141	0.0364917	0.285865	186.861	186.906	255.742	311.778	111.019	110.456	237.066	123.997	175.81	205.79	189.606	171.771
NA	NA	11.0649	-14.9461	1.86623	-2.09069	0.0365561	0.286162	0	2.96677	0	0	0	15.3107	31.0296	0	16.6119	43.3241	10.249	13.2861
NA	NA	10.7609	16.2376	1.9239	2.09017	0.0366027	0.28632	0	2.22508	10.2297	0	0	0	0	0	31.8396	50.2166	6.14939	28.4703
ENSMUSG00000045107	Saysd1	355.781	-1.59091	0.3206	-2.08938	0.0366737	0.286669	247.465	251.434	393.377	327.061	351.407	386.049	826.63	377.586	275.481	241.237	249.05	342.592
ENSMUSG00000022351	Sqle	722.49	1.52159	0.289955	2.08851	0.0367516	0.287071	738.355	792.127	1185.71	800.077	400.952	610.242	457.997	840.945	647.866	511.028	706.155	978.428
ENSMUSG00000058655	Eif4b	12864.8	1.18511	0.117336	2.08818	0.0367818	0.287099	15363	12302.4	12945.2	13448.5	11159.7	11450.2	11274.9	11728.5	13351.8	12635.9	13867.9	14850.1
ENSMUSG00000048779	P2ry6	554.28	1.69155	0.363246	2.08769	0.0368262	0.287099	749.466	597.062	839.762	1032.38	439.488	566.498	618.11	279.694	242.257	209.728	625.188	451.728
ENSMUSG00000087235	Gm4750	155.424	1.51126	0.285379	2.08759	0.0368348	0.287099	201.002	201.74	176.694	204.031	129.369	114.831	143.978	130.524	89.9814	131.942	183.457	157.535
ENSMUSG00000012535	Tnpo3	5.28533	-95.9132	3.15532	-2.08653	0.0369309	0.287642	0	0	0	0	0	21.8725	38.4768	0	0	0	3.07469	0
ENSMUSG00000028494	Plin2	4809.09	1.36815	0.216894	2.08502	0.0370679	0.288501	7708.79	5940.95	4612.65	6431.18	4257.25	4448.86	4087.22	5254.51	3070.44	5279.64	3193.58	3424.02
ENSMUSG00000024737	Slc15a3	2362.98	1.77152	0.395966	2.08348	0.0372077	0.289382	5932.09	4990.1	1703.7	1592.51	3000.26	1704.96	1355.37	1964.38	1668.12	2087.44	1094.59	1262.18
ENSMUSG00000008822	Acyp1	7.51444	-53.5897	2.75894	-2.08191	0.0373503	0.289866	0	0	0	0	0	19.6852	0	13.9847	0	40.3702	0	16.1331
ENSMUSG00000040433	Zbtb38	9.35013	-12.9579	1.77502	-2.0821	0.0373338	0.289866	0	0	3.71988	0	5.50507	14.2171	4.96474	22.3755	0	48.2473	11.2739	1.89802
ENSMUSG00000071478	H2ac7	8.77613	-9.61683	1.56848	-2.08199	0.0373436	0.289866	0	1.48338	2.78991	0.764161	23.8553	4.3745	2.48237	17.7139	0	33.4777	17.4233	0.949008
ENSMUSG00000028645	Slc2a1	1373.28	-1.26909	0.165168	-2.08151	0.0373876	0.289948	1434.29	1180.77	1194.08	912.408	1542.34	1502.64	1395.09	1548.57	1555.99	1481.88	1397.96	1333.36
ENSMUSG00000031767	Nudt7	14.5625	-9.58293	1.56727	-2.08035	0.0374939	0.290564	0	0	7.43975	0	15.5977	28.4342	0	26.1047	47.0672	32.4931	7.17428	10.4391
ENSMUSG00000060600	Eno3	5.64435	-37.2133	2.50943	-2.07925	0.037594	0.290901	0	0	0	0	11.0101	0	12.4119	0	0	27.5699	8.19918	8.54108
ENSMUSG00000024767	Otub1	2058.27	1.23696	0.147539	2.07943	0.0375779	0.290901	2488.79	2154.61	2394.67	2658.52	2050.64	2111.79	1846.88	1829.2	1738.72	2126.82	1586.54	1712.01
ENSMUSG00000047205	Dusp18	253.387	1.65234	0.34849	2.07899	0.0376179	0.290901	297.968	372.329	171.114	238.418	234.883	132.329	148.942	137.05	227.03	252.068	372.038	456.473
ENSMUSG00000060935	Tmem263	416.612	-1.58191	0.318333	-2.07854	0.0376595	0.291015	285.848	331.536	248.302	267.456	467.013	364.177	565.981	396.233	474.825	345.608	892.686	359.674
ENSMUSG00000038587	Akap12	110.39	1.91756	0.452035	2.07787	0.0377209	0.291282	201.002	175.781	83.6972	158.946	67.8958	79.8346	42.2003	132.388	89.9814	120.126	116.838	55.9915
ENSMUSG00000040296	Ddx58	1046.51	-1.52358	0.292422	-2.07736	0.0377685	0.291322	792.899	686.807	559.841	615.15	1091.84	556.655	1356.62	1039.53	1214.06	1025.99	2129.74	1488.99
NA	NA	10.3157	-25.3193	2.24441	-2.07723	0.03778	0.291322	0	0	2.78991	0	9.17511	60.1493	0	0	30.4552	0	17.4233	3.79603
ENSMUSG00000114968	A630019I02Rik	39.7041	-8.5843	1.4938	-2.07639	0.0378583	0.291511	0	0	0	35.9156	73.4009	45.9322	53.371	137.05	56.7575	0	25.6224	48.3994
ENSMUSG00000024095	Hnrnpll	6.18209	-117.945	3.3143	-2.07645	0.0378523	0.291511	0	0	0	0	0	0	58.3357	15.8493	0	0	0	0
ENSMUSG00000030245	Golt1b	1352.14	-1.33532	0.201084	-2.0747	0.0380146	0.292507	1381.77	1069.52	1176.41	972.777	1399.2	1470.93	1958.59	1314.56	1593.36	1070.3	1354.91	1463.37
ENSMUSG00000060512	0610040J01Rik	152.451	1.95402	0.466208	2.07299	0.0381728	0.2931	270.697	206.932	265.041	221.607	86.2461	126.86	134.048	146.373	146.739	133.911	23.5726	67.3796
ENSMUSG00000034075	Zdhhc5	1618.09	-1.47932	0.272451	-2.07352	0.0381235	0.2931	1163.59	1483.38	909.51	662.528	1937.78	1246.73	1449.7	1606.37	1900.68	1589.21	2772.35	2695.18
ENSMUSG00000047368	Abhd17b	1150.38	-1.49359	0.279197	-2.07304	0.0381687	0.2931	875.724	760.234	788.614	841.341	1125.79	1078.31	1329.31	1344.39	1954.67	744.387	1908.36	1053.4
ENSMUSG00000006494	Pdk1	6.14439	60.4818	2.85634	2.07204	0.0382622	0.293245	18.1811	17.8006	10.2297	0	0	0	0	0	0	0	0	27.5212
ENSMUSG00000025612	Bach1	1610.65	1.79088	0.405744	2.07192	0.0382729	0.293245	2756.46	2330.4	1112.24	696.915	1539.58	912.083	434.415	963.078	1879.92	1803.86	2885.09	2013.8
ENSMUSG00000029407	Uso1	4435.84	-1.48711	0.276312	-2.07196	0.0382689	0.293245	3348.36	3234.52	1888.77	1907.35	4031.55	3234.94	4093.43	4074.2	6394.21	3823.35	9427.01	7772.38
ENSMUSG00000020125	Elane	222.289	-8.60421	1.49907	-2.07131	0.03833	0.293475	47.4729	143.147	39.9887	0	813.833	824.593	177.49	168.748	131.511	178.22	142.461	0
ENSMUSG00000023944	Hsp90ab1	65496	1.24144	0.15071	2.07034	0.0384205	0.293753	79780.8	68272.7	66762.5	78386.1	59744.7	60951	55813.6	59668	53541.7	55578	72043.1	75410.1
ENSMUSG00000037202	Prf1	945.913	1.36732	0.217977	2.07061	0.0383948	0.293753	1508.02	1217.86	916.02	997.23	823.925	741.477	839.041	987.318	649.25	835.959	1031.05	803.81
ENSMUSG00000019505	Ubb	91.6213	-2.02474	0.491825	-2.06931	0.0385167	0.293827	40.4025	66.0106	75.3275	56.5479	122.029	159.669	135.289	66.1942	188.269	66.9555	68.6681	54.0935
ENSMUSG00000066456	Hmgn3	16.7024	-12.3618	1.75285	-2.06967	0.0384836	0.293827	0	0	0	5.34913	53.2157	14.2171	0	0	51.2202	26.5853	19.4731	30.3683
ENSMUSG00000032381	Ciao2a	8.3902	14.6837	1.87337	2.06908	0.0385386	0.293827	26.2616	9.64199	17.6694	9.9341	0	4.3745	0	0	0	14.7696	0	18.0312
ENSMUSG00000024253	Dync2li1	115.652	-1.70584	0.372342	-2.06928	0.0385198	0.293827	80.805	65.2689	95.7868	119.209	139.462	134.516	116.671	224.687	145.354	96.4947	72.7677	96.7989
ENSMUSG00000018920	Cxcl16	283.879	1.64298	0.346365	2.0681	0.0386305	0.29432	398.975	390.13	241.792	559.366	367.005	263.564	142.736	193.921	206.265	264.868	182.432	195.496
ENSMUSG00000022433	Csnk1e	190.539	-1.80909	0.413666	-2.06751	0.0386859	0.294535	173.731	111.254	99.5067	180.342	223.873	183.729	379.803	234.943	276.866	76.8019	194.731	150.892
ENSMUSG00000031604	Msmo1	869.99	1.52975	0.296678	2.06722	0.0387138	0.29454	1714.08	1224.53	906.72	660.235	611.063	728.354	943.301	662.874	883.202	915.715	611.864	577.946
ENSMUSG00000006445	Epha2	144.968	2.48778	0.636408	2.06606	0.0388226	0.294575	394.934	409.414	123.686	58.8404	196.347	76.5537	91.8477	31.6986	49.8358	95.51	67.6432	143.3
ENSMUSG00000038059	Smim3	1092.36	1.51989	0.292292	2.06631	0.0387991	0.294575	1825.18	1868.32	1025.76	1215.78	1241.39	1243.45	577.151	841.878	775.224	1071.29	644.661	778.187
ENSMUSG00000022427	Tomm22	4198.72	1.27582	0.17012	2.06575	0.0388519	0.294575	5778.57	4295.88	5466.36	5399.56	3317.72	4889.6	4412.41	3794.51	3584.03	3470.85	2848.19	3126.98
ENSMUSG00000023972	Ptk7	7.34689	58.8402	2.8454	2.06604	0.0388244	0.294575	21.2113	23.7341	0	0	0	0	0	0	0	40.3702	0	2.84703
ENSMUSG00000097093	C330013E15Rik	51.2838	-2.81506	0.722829	-2.06573	0.0388543	0.294575	21.2113	8.15861	33.4789	35.1514	22.9378	57.9621	43.4415	151.035	127.358	34.4624	45.0955	35.1133
ENSMUSG00000073987	Ggh	1013.6	-1.51618	0.290757	-2.06509	0.0389145	0.294687	1037.33	579.261	743.975	997.23	785.39	1441.4	1814.61	1050.72	1025.79	1167.78	722.553	797.167
ENSMUSG00000038253	Hoxa5	25.286	-5.00537	1.12517	-2.06499	0.0389235	0.294687	0	0	20.4593	11.4624	16.5152	39.3705	76.9535	27.037	24.9179	41.3549	35.8714	9.49008
ENSMUSG00000009907	Vps4b	3188.7	1.24396	0.152595	2.06388	0.0390289	0.295279	4146.31	3689.17	2945.21	2919.86	2669.04	2802.96	2612.7	2927.46	3267.02	3184.32	3637.36	3462.93
ENSMUSG00000071369	Map3k5	1023.11	-1.63419	0.343647	-2.06193	0.0392144	0.296475	530.283	961.974	618.429	447.034	1620.33	660.549	871.312	1027.41	1450.78	712.879	1752.58	1623.75
ENSMUSG00000024613	Tcof1	5.36672	64.8885	2.92195	2.06023	0.0393768	0.296875	30.3019	19.284	0	0	0	0	0	0	9.6903	0	5.12449	0
ENSMUSG00000025130	P4hb	18787.9	-1.30061	0.183978	-2.06108	0.0392958	0.296875	18330.6	15685.3	12807.5	13560	18287.8	18847.5	22633	18767.4	24398.8	15729.6	24745.1	21662.1
ENSMUSG00000026475	Rgs16	321.544	-1.72474	0.38161	-2.0607	0.0393321	0.296875	306.049	178.006	210.173	191.804	532.157	279.968	495.233	220.026	375.153	476.565	170.133	423.258
ENSMUSG00000042694	Stn1	571.117	1.50807	0.28769	2.06023	0.0393769	0.296875	865.623	456.882	751.415	745.821	355.994	684.609	482.821	346.82	610.489	647.893	457.104	447.932
ENSMUSG00000031672	Got2	3779.96	1.23624	0.148603	2.05891	0.0395031	0.297619	4181.66	4126.03	3844.49	4225.81	3437	3684.42	3287.9	2839.82	4122.53	3180.39	3978.65	4450.85
ENSMUSG00000014504	Srp19	2308.86	-1.39359	0.232619	-2.05833	0.0395583	0.297621	1811.04	1663.61	2368.63	2408.64	1956.13	3038.09	4102.12	2406.3	2040.5	2163.25	1760.77	1987.22
ENSMUSG00000032561	Acpp	67.0243	-2.88329	0.74216	-2.05847	0.0395446	0.297621	29.2918	15.5755	33.4789	54.2554	35.7829	17.498	104.26	224.687	30.4552	45.2934	117.863	95.8498
ENSMUSG00000069763	Tmem100	19.6205	-5.04006	1.13411	-2.05751	0.039637	0.297958	0	9.64199	12.0896	0	23.8553	19.6852	53.371	13.0524	23.5336	28.5545	44.0706	7.59207
ENSMUSG00000071074	Yipf3	3303.51	-1.31093	0.189856	-2.05729	0.0396581	0.297958	3610.97	2344.49	2482.09	2952.72	3317.72	3665.83	4341.67	3606.18	4146.06	3284.76	2859.46	3030.18
ENSMUSG00000050919	Zfp366	584.027	1.82984	0.42382	2.05682	0.039704	0.298096	437.357	875.196	609.13	560.894	549.589	274.5	261.89	270.37	394.534	413.549	1566.04	795.269
ENSMUSG00000045573	Penk	7.23783	-26.3421	2.29592	-2.05551	0.0398294	0.298624	0	0	1.85994	0	0	0	28.5473	19.5786	9.6903	16.7389	0	10.4391
ENSMUSG00000021027	Ralgapa1	9.33829	49.6239	2.74036	2.05555	0.0398256	0.298624	0	30.4094	7.43975	0	0	0	0	0	0	0	66.6184	7.59207
ENSMUSG00000057135	Scimp	1049.7	1.46114	0.266362	2.05396	0.0399799	0.299045	1261.57	869.263	1336.37	1914.99	939.532	909.896	846.489	987.318	1043.78	1157.94	687.706	641.53
ENSMUSG00000020546	Stxbp4	71.9677	-2.13636	0.533436	-2.05301	0.0400712	0.299045	30.3019	35.6012	57.6581	9.9341	40.3705	74.3665	95.5713	74.585	143.97	94.5254	126.062	80.6657
ENSMUSG00000029073	Cptp	499.753	-1.53279	0.300159	-2.05278	0.0400937	0.299045	333.321	364.912	350.598	359.156	444.076	496.506	501.439	716.016	667.246	367.271	955.205	441.289
ENSMUSG00000044566	Cage1	71.9596	-3.23284	0.82404	-2.05427	0.0399496	0.299045	0	68.9773	36.2688	11.4624	92.6687	59.0557	155.148	71.788	81.6754	53.1705	126.062	107.238
ENSMUSG00000017057	Il13ra1	1575.32	-1.3956	0.234191	-2.05337	0.0400371	0.299045	1430.25	951.591	980.187	953.673	953.294	1509.2	1738.9	1820.81	2155.4	1747.73	2297.82	2364.93
ENSMUSG00000054200	Ffar4	297.276	1.59586	0.32852	2.05265	0.0401063	0.299045	315.139	389.388	424.996	519.63	257.821	273.406	368.632	135.185	148.123	234.344	263.399	237.252
NA	NA	5.96992	8.46405	1.50098	2.05289	0.0400832	0.299045	4.04025	16.3172	4.64985	7.64161	1.83502	0	0	1.86462	1.38433	12.8003	3.07469	18.0312
NA	NA	30.5324	3.3387	0.847324	2.05268	0.0401036	0.299045	135.348	32.6344	32.5489	77.9444	21.1028	16.4044	14.8942	30.7663	0	0	0	4.74504
ENSMUSG00000073591	Pcdhb22	12.1593	-9.91034	1.61304	-2.05137	0.0402313	0.29977	0	0	0	8.40577	17.4327	0	45.9239	21.4432	9.6903	12.8003	23.5726	6.64306
ENSMUSG00000038544	Inip	965.414	1.29363	0.181125	2.05067	0.0402992	0.299819	1081.78	1393.64	928.109	1068.3	973.48	830.061	850.212	803.653	834.75	1076.21	903.96	840.821
ENSMUSG00000050705	2310061I04Rik	275.62	-1.78118	0.40634	-2.0496	0.040404	0.299819	70.7044	287.776	205.523	236.89	361.499	355.428	356.22	355.211	373.769	129.972	285.946	288.499
ENSMUSG00000038965	Ube2l3	2966.44	1.28335	0.175539	2.05031	0.0403345	0.299819	4005.91	3213.75	3111.68	3141.47	2665.37	3038.09	2613.94	2180.68	2537.47	3573.26	2550.97	2964.7
ENSMUSG00000023022	Lima1	5.82984	-63.9886	2.92685	-2.04989	0.0403747	0.299819	0	0	0	0	0	3.28087	17.3766	19.5786	0	0	29.722	0
ENSMUSG00000045672	Col27a1	225.378	1.72039	0.381845	2.04988	0.0403757	0.299819	172.721	310.769	320.839	421.817	268.831	109.362	131.566	202.312	124.59	219.575	177.307	244.844
ENSMUSG00000085175	Gm11423	54.9625	-3.24436	0.828349	-2.04978	0.040386	0.299819	35.3522	5.93353	66.0278	7.64161	67.8958	57.9621	198.59	47.5479	59.5261	52.1859	53.2947	7.59207
ENSMUSG00000032965	Ift57	504.571	1.53084	0.300133	2.04685	0.0406727	0.301607	800.979	703.124	498.463	778.68	500.961	590.557	386.009	339.362	197.959	448.996	451.98	357.776
ENSMUSG00000036820	Amdhd2	942.783	1.40165	0.238088	2.04599	0.0407576	0.301617	1542.36	1267.55	1009.02	1169.93	1029.45	977.7	829.112	722.542	949.649	627.215	483.752	705.113
ENSMUSG00000029767	Calu	73.067	-2.15699	0.542007	-2.04614	0.0407425	0.301617	8.0805	53.4018	41.8486	32.0948	56.8857	60.1493	86.883	89.502	76.1381	78.7712	138.361	154.688
ENSMUSG00000036381	P2ry14	26.1738	3.78063	0.937571	2.04638	0.040719	0.301617	29.2918	51.1767	28.829	42.793	19.2677	9.84262	11.1707	0	31.8396	21.6621	62.5188	5.69405
ENSMUSG00000036327	Qsox2	127.024	-1.63615	0.347241	-2.04556	0.0407993	0.30172	70.7044	86.7779	70.6777	52.7271	82.576	107.175	93.0889	176.207	235.336	192.005	169.108	187.904
ENSMUSG00000032375	Aph1b	197.048	1.8045	0.416484	2.04474	0.0408808	0.30191	244.435	300.385	195.294	320.184	188.09	69.992	146.46	182.733	134.28	94.5254	300.295	187.904
ENSMUSG00000084990	Gm14549	9.08673	-11.0134	1.69256	-2.04495	0.0408599	0.30191	0	0	0	6.87745	7.34009	17.498	42.2003	10.2554	15.2276	0	2.0498	7.59207
ENSMUSG00000029076	Sdf4	6.01798	58.9491	2.87681	2.04442	0.0409123	0.301938	31.3119	0	0	13.7549	0	0	0	0	0	12.8003	14.3486	0
ENSMUSG00000028970	Abcb1b	1111.27	-1.70548	0.376966	-2.0431	0.041043	0.302696	902.996	1191.16	369.198	303.372	1539.58	962.39	966.883	1249.3	1341.41	1072.27	1901.19	1535.5
ENSMUSG00000002289	Angptl4	459.65	1.89327	0.451027	2.04175	0.0411767	0.303318	1378.73	651.205	426.856	428.694	484.446	249.346	244.514	544.47	258.869	485.427	150.66	212.578
ENSMUSG00000047767	Atg16l2	30.0284	-3.33051	0.850155	-2.04168	0.0411833	0.303318	22.2214	18.5423	11.1596	17.5757	56.8857	39.3705	90.6065	44.751	9.6903	0	15.3735	34.1643
ENSMUSG00000014030	Pax5	1102.91	1.5597	0.314188	2.04104	0.0412473	0.303583	1639.33	1574.61	746.765	753.463	867.048	462.603	855.177	837.216	1488.15	1069.32	1734.13	1207.14
ENSMUSG00000044708	Kcnj10	1196.68	1.72944	0.387653	2.03869	0.0414809	0.303801	1991.84	2408.27	954.148	806.19	1357	538.063	647.899	1018.08	1251.43	1713.27	793.271	880.68
ENSMUSG00000067615	Krt81	5.86273	-111.946	3.33861	-2.03877	0.0414726	0.303801	0	0	0	0	26.6078	43.745	0	0	0	0	0	0
ENSMUSG00000032309	Fbxo22	1034.96	1.35465	0.214859	2.03815	0.0415345	0.303801	1729.23	1125.89	1055.51	1080.52	799.152	961.296	904.824	1018.08	1125.46	883.222	981.852	754.462
ENSMUSG00000029310	Nudt9	6136.96	1.39815	0.237261	2.03793	0.0415574	0.303801	10310.7	7304.92	5794.64	8280.45	5813.35	7585.38	4614.73	4652.24	5138.63	5589.8	3352.44	5206.26
ENSMUSG00000025875	Tspan17	379.167	-1.65161	0.355129	-2.03833	0.041517	0.303801	283.827	223.249	243.652	314.07	442.24	556.655	281.749	477.344	642.328	582.907	242.901	259.079
ENSMUSG00000025044	Msr1	49.0606	3.4387	0.873474	2.03997	0.0413533	0.303801	165.65	76.3942	36.2688	51.963	43.123	40.4641	0	12.1201	26.3022	74.8326	24.5975	37.0113
ENSMUSG00000025417	Pip4k2c	140.081	1.99951	0.4904	2.03843	0.0415072	0.303801	288.878	187.648	132.986	145.955	87.1636	40.4641	140.254	110.013	55.3731	106.341	187.556	198.343
ENSMUSG00000030060	Hmces	1525.11	-1.47578	0.275336	-2.03926	0.0414242	0.303801	1664.58	977.55	982.047	991.117	1608.4	1994.77	1804.68	1402.2	2663.45	1393.26	1637.79	1181.52
ENSMUSG00000022538	Lsg1	1426.65	1.3068	0.189325	2.03901	0.0414488	0.303801	1940.33	1612.44	1539.1	1670.46	1168.91	1223.77	1694.22	1089.87	1049.32	1438.56	1352.86	1340
NA	NA	13.4733	14.7702	1.90514	2.03902	0.0414482	0.303801	89.8955	37.8263	9.29969	7.64161	0	9.84262	0	0	0	0	7.17428	0
ENSMUSG00000031799	Tpm4	13074.2	1.32247	0.197978	2.03675	0.0416753	0.304018	18976	16441.1	12395.6	13315.5	13531.5	12564.7	8487.23	11637.1	12335.8	12127.8	10436.5	14641.3
ENSMUSG00000012889	Podnl1	281.882	-1.94375	0.470713	-2.037	0.0416504	0.304018	193.932	89.7447	195.294	249.881	315.624	376.207	394.697	330.038	78.9067	373.178	554.47	230.609
ENSMUSG00000020409	Slu7	6.29872	-31.0971	2.43491	-2.03651	0.0416993	0.304018	0	0	0	0	8.2576	0	0	11.1877	29.0709	14.7696	12.2988	0
NA	NA	799.906	-1.36219	0.218901	-2.03714	0.0416358	0.304018	726.235	580.003	716.076	913.937	769.792	1293.76	1077.35	860.524	585.571	668.57	713.329	693.725
ENSMUSG00000037351	Actr1b	1639.64	-1.29934	0.185568	-2.03582	0.0417684	0.304317	1043.39	1715.53	1611.64	1495.46	1916.68	2024.3	2029.34	1654.85	1468.77	1592.16	1375.41	1748.07
ENSMUSG00000038866	Zcchc2	55.2721	2.25158	0.575819	2.03352	0.0419998	0.305766	44.4427	80.8444	78.1174	50.4346	48.6281	12.0299	19.859	31.6986	78.9067	114.218	72.7677	31.3173
ENSMUSG00000022216	Psme1	18131.8	1.33072	0.202761	2.03295	0.0420575	0.305766	23181.9	20492.2	19401	28905.2	14412.3	21883.4	18498.6	14328.7	15810.4	16450.4	11328.2	12889.4
ENSMUSG00000055041	Commd5	377.506	-1.45695	0.267106	-2.03273	0.0420802	0.305766	230.294	303.352	341.299	384.373	320.211	452.761	472.892	590.154	454.06	313.115	300.295	367.266
ENSMUSG00000018919	Tm4sf5	215.76	1.70476	0.378533	2.03302	0.0420507	0.305766	451.498	181.714	212.963	379.788	126.617	201.227	122.877	267.574	145.354	178.22	135.286	186.006
ENSMUSG00000026511	Srp9	2656.74	-1.3923	0.234993	-2.03183	0.0421711	0.306174	2378.7	1783.03	2016.17	2654.7	2431.41	3887.84	3502.63	2477.15	3669.85	2670.34	2063.12	2345.95
ENSMUSG00000083282	Ctsf	256.549	1.64282	0.352514	2.03161	0.0421929	0.306174	477.759	283.326	343.159	298.787	259.656	142.171	186.178	264.777	236.72	309.177	125.038	151.841
ENSMUSG00000000078	Klf6	10799.8	-1.46864	0.27308	-2.03046	0.04231	0.306818	7819.9	8000.63	7176.57	7333.65	7946.57	6877.8	16325.3	13396.4	12859	11716.2	19669.8	10475.2
ENSMUSG00000039678	Tbc1d13	1645.81	1.26659	0.168004	2.02941	0.0424165	0.307385	2220.12	2007.76	1707.42	1571.12	1624.91	1313.44	1601.13	1386.35	1486.77	1708.35	1719.78	1402.63
ENSMUSG00000020246	Hcfc2	141.805	-2.32582	0.600335	-2.02843	0.0425162	0.307873	94.9458	23.7341	67.8877	72.5953	127.534	42.6514	79.4359	351.482	285.172	116.187	200.88	239.15
ENSMUSG00000026112	Coa5	3961.92	1.32201	0.198567	2.02819	0.0425406	0.307873	4240.24	4950.79	4053.74	3884.23	3423.24	3186.82	2918.03	3428.11	3795.83	3077	5816.29	4768.77
ENSMUSG00000063160	Numbl	101.653	-2.39221	0.620913	-2.0266	0.042703	0.308841	54.5434	20.7674	76.2575	95.5201	138.544	60.1493	189.901	202.312	134.28	22.6467	153.735	71.1756
ENSMUSG00000097032	4930539J05Rik	6.10269	36.2966	2.55736	2.02621	0.0427429	0.308924	0	17.0589	3.71988	6.87745	0	0	0	0	37.3769	0	8.19918	0
ENSMUSG00000048234	Rnf149	2060.7	1.43272	0.256545	2.02209	0.0431668	0.311364	3804.9	2954.9	1734.39	2073.93	2280.02	1608.72	1448.46	2037.1	1998.97	1560.65	1816.12	1410.23
ENSMUSG00000046618	Olfml2a	4.79338	42.5999	2.67673	2.02216	0.0431597	0.311364	0	14.0921	17.6694	0.764161	0	0	0	0	0	8.86175	0	16.1331
ENSMUSG00000013155	Enkd1	147.964	-1.4972	0.287917	-2.02236	0.0431397	0.311364	110.097	140.18	188.784	139.841	214.698	265.751	184.937	201.379	69.2164	75.8172	87.1163	97.7479
ENSMUSG00000020910	Adprm	526.062	-1.37868	0.229193	-2.02139	0.043239	0.311477	431.297	436.856	453.825	401.949	461.508	706.481	650.381	559.387	722.619	549.429	544.221	394.787
ENSMUSG00000021360	Gcnt2	146.485	2.98922	0.781529	2.02138	0.0432399	0.311477	319.18	351.562	141.355	70.3028	74.3184	110.456	0	110.013	103.825	181.174	173.208	122.422
ENSMUSG00000024294	Mib1	866.048	-1.58778	0.33003	-2.02107	0.0432727	0.311506	377.763	849.237	478.004	458.497	1004.67	530.408	763.329	1137.42	1233.44	926.546	1778.2	855.057
ENSMUSG00000027368	Dusp2	3999.3	1.2552	0.162552	2.01729	0.0436649	0.314121	4866.48	5389.87	5031.13	5324.68	4833.45	3598.02	4146.8	3842.99	2336.75	2645.73	2534.57	3441.1
ENSMUSG00000043683	Fem1a	1672.22	-1.42706	0.254455	-2.01626	0.0437728	0.314688	1445.4	1507.86	996.927	756.52	2132.3	1327.66	1314.42	1940.14	2249.53	1811.74	2466.93	2117.24
ENSMUSG00000058385	H2bc8	39.5593	-3.98459	0.990172	-2.01423	0.0439856	0.316008	13.1308	0	43.7085	16.0474	22.0203	54.6812	99.2948	113.742	30.4552	24.616	52.2698	4.74504
ENSMUSG00000020277	Pfkl	8.49718	-19.1342	2.11474	-2.01352	0.0440597	0.316331	0	0	1.85994	0.764161	0	8.749	0	41.0217	26.3022	0	19.4731	3.79603
ENSMUSG00000072620	Slfn2	5554.42	1.50866	0.294709	2.01308	0.0441065	0.316457	13070.2	8163.06	4279.72	5035.82	5073.84	5412.35	5162.09	4600.03	4254.04	4248.72	2873.81	4479.32
ENSMUSG00000047379	B4gat1	337.71	-1.55438	0.316161	-2.01271	0.0441454	0.316526	293.928	126.088	285.501	325.533	391.777	384.956	430.691	394.368	502.511	265.853	337.191	314.122
ENSMUSG00000010290	AI597479	347.43	1.42031	0.251545	2.01241	0.0441768	0.316542	422.206	436.115	371.058	277.391	282.594	218.725	320.226	239.604	293.478	396.81	460.179	450.779
ENSMUSG00000036966	Spryd3	1368.56	-1.25781	0.164494	-2.01171	0.0442503	0.316859	1332.27	1099.93	1305.68	1241.76	1357.92	1834.01	1717.8	1354.65	1385.71	1249.51	1155.06	1388.4
ENSMUSG00000047843	Bri3	151.364	1.62818	0.349822	2.01035	0.0443941	0.317679	304.029	191.356	152.515	168.88	122.029	172.793	90.6065	115.607	157.813	93.5407	108.639	138.555
ENSMUSG00000026596	Abl2	5.46685	-33.6363	2.52451	-2.00908	0.0445283	0.318009	0	0	0	0	0	0	6.20593	14.917	11.0746	0	15.3735	18.0312
ENSMUSG00000022064	Pibf1	231.278	1.62852	0.350148	2.00932	0.0445031	0.318009	238.375	278.876	382.217	264.4	114.689	159.669	212.243	228.416	135.664	241.237	339.241	180.312
ENSMUSG00000052658	5830454E08Rik	40.4243	-3.25252	0.84689	-2.00918	0.0445178	0.318009	21.2113	18.5423	20.4593	25.9815	55.0507	75.4601	120.395	29.834	34.6082	0	38.9461	44.6034
ENSMUSG00000033707	Lrrc24	7.99949	25.356	2.32212	2.00862	0.0445773	0.318149	24.2415	0	0	26.7456	1.83502	0	0	0	30.4552	0	5.12449	7.59207
ENSMUSG00000074358	Ccdc61	389.202	-1.39118	0.237247	-2.00765	0.0446802	0.318673	268.677	318.186	374.778	463.082	420.22	472.446	457.997	632.108	317.011	338.716	279.797	327.408
ENSMUSG00000046546	Fam43a	1337.9	1.31874	0.198874	2.0071	0.0447387	0.318881	1818.11	1311.31	1709.28	1594.8	1222.13	920.832	1402.54	1332.27	1142.07	1391.3	1267.8	942.365
ENSMUSG00000089687	Rab42	10.2211	13.852	1.89001	2.00635	0.0448191	0.319244	41.4125	11.1254	6.50978	19.104	5.50507	0	0	0	30.4552	0	0	8.54108
ENSMUSG00000031200	Mtcp1	66.4084	-2.10152	0.534614	-2.00412	0.0450567	0.319286	43.4327	31.1511	57.6581	23.689	59.6382	39.3705	130.324	97.8928	87.2127	118.157	66.6184	41.7564
ENSMUSG00000010021	Kif19a	253.793	-1.53403	0.308074	-2.00381	0.0450902	0.319286	240.395	137.213	210.173	158.181	259.656	199.04	340.085	344.023	357.157	223.513	346.415	229.66
ENSMUSG00000060568	Fam78b	4.86904	37.5322	2.60908	2.00456	0.0450101	0.319286	0	14.8338	0	13.7549	0	0	0	0	17.9963	0	6.14939	5.69405
ENSMUSG00000036905	C1qb	13042.8	1.75659	0.405599	2.00389	0.0450822	0.319286	33487.6	22925	10525.4	13865.7	12322.2	10018.7	11001.9	12657.1	8074.79	14084.3	2797.97	4752.63
ENSMUSG00000029832	Nfe2l3	47.6874	2.40486	0.631605	2.00434	0.0450333	0.319286	45.4528	66.0106	60.448	91.6993	4.58756	45.9322	21.1002	38.2248	42.9142	73.848	44.0706	37.9603
ENSMUSG00000021615	Xrcc4	496.284	-1.4546	0.269738	-2.00424	0.0450442	0.319286	386.854	375.296	429.646	473.78	384.437	779.754	718.646	541.673	588.34	526.782	403.81	346.388
ENSMUSG00000022906	Parp9	1444.97	1.38561	0.234711	2.0047	0.0449953	0.319286	1797.91	2119.01	1668.36	1432.8	968.892	1067.38	1419.92	1609.17	1280.5	1052.58	1784.35	1138.81
ENSMUSG00000035967	Ints6l	795.028	-1.56649	0.323048	-2.00445	0.0450218	0.319286	203.022	509.542	693.757	592.225	1000.09	547.906	719.888	863.321	998.101	1202.24	1217.58	992.663
ENSMUSG00000087150	BC064078	569.683	-1.54454	0.312887	-2.0045	0.0450168	0.319286	477.759	499.9	371.058	548.668	479.858	729.448	970.607	752.376	840.287	405.671	351.54	409.023
ENSMUSG00000030321	Efcab12	6.22539	-89.1309	3.23371	-2.00323	0.0451531	0.319308	0	0	0	0	33.0304	22.9661	0	0	0	18.7081	0	0
ENSMUSG00000018585	Atox1	7969.98	1.44194	0.263614	2.00296	0.0451818	0.319308	11092.5	9076.08	8868.19	14471.7	6661.13	9852.46	7169.09	6491.69	5846.02	8070.1	3382.16	4658.68
ENSMUSG00000017493	Igfbp4	548.291	1.52913	0.305899	2.00299	0.0451784	0.319308	939.358	465.782	681.667	602.923	477.106	511.816	289.196	479.208	607.72	668.57	309.519	546.629
ENSMUSG00000054226	Tprkb	14.9956	-13.422	1.87139	-2.00201	0.0452837	0.319777	0	8.9003	0	0	8.2576	18.5916	38.4768	55.9387	45.6828	0	4.09959	0
ENSMUSG00000022312	Eif3h	11443.9	1.31679	0.198359	2.00152	0.0453367	0.319777	17106.4	11152.1	13812.8	14679.5	9166.86	13501.9	11201.7	9228.02	10620.6	10601.6	7213.23	9042.15
ENSMUSG00000038507	Parp12	981.346	1.32415	0.202377	2.00156	0.0453316	0.319777	1011.07	1203.02	1075.04	1234.88	717.494	902.24	1026.46	772.887	742	1025.01	1205.28	860.751
ENSMUSG00000028405	Aco1	1281.29	1.35334	0.218341	1.99926	0.04558	0.321284	1900.94	1429.98	1441.45	1047.66	940.449	1044.41	973.089	1340.66	1178.06	1169.75	1606.01	1302.99
ENSMUSG00000016637	Ift27	508.448	-1.46933	0.277739	-1.99885	0.0456242	0.321387	397.964	290.743	519.853	415.704	489.951	585.089	737.264	574.304	750.306	536.628	355.64	447.932
ENSMUSG00000032254	Kif23	1013.29	1.43375	0.260269	1.99714	0.04581	0.322485	721.184	1459.65	1407.97	1148.53	860.626	988.637	585.84	868.915	851.362	1191.41	1203.23	872.139
ENSMUSG00000073600	Prob1	98.3153	-2.18165	0.563842	-1.99599	0.0459352	0.323157	7.07044	73.4275	66.0278	51.1988	153.224	75.4601	83.1594	120.268	195.19	103.387	139.386	111.983
ENSMUSG00000029864	Gstk1	299.319	1.59913	0.339449	1.99526	0.0460142	0.323503	629.269	344.145	351.528	434.044	137.627	293.091	330.155	339.362	200.728	231.39	136.311	164.178
NA	NA	7.1554	-37.5862	2.62289	-1.99479	0.0460653	0.323652	0	0	0	1.52832	52.2981	0	0	10.2554	0	18.7081	3.07469	0
ENSMUSG00000020534	Shmt1	175.511	1.84041	0.441564	1.99298	0.0462633	0.324698	336.351	155.755	267.831	246.06	187.172	63.4302	98.0537	196.718	70.6008	201.851	134.262	148.045
ENSMUSG00000097328	Tnfsf12	99.3451	1.92842	0.475401	1.99288	0.0462741	0.324698	231.304	117.187	144.145	87.1144	83.4935	104.988	59.5769	52.2095	35.9925	125.049	66.6184	84.4617
ENSMUSG00000050232	Cxcr3	1208.16	-1.44479	0.266573	-1.99143	0.0464339	0.325608	791.889	752.075	1142.93	1448.09	1083.58	1210.64	1985.9	1695.88	897.045	1270.18	1165.31	1054.35
ENSMUSG00000042737	Dpm3	1171.69	-1.64483	0.360752	-1.99013	0.0465771	0.326401	1086.83	680.873	777.454	968.956	879.893	1619.66	1911.43	1369.57	2263.38	1090	680.532	731.685
ENSMUSG00000009292	Trpm2	5173.7	1.44784	0.268468	1.98868	0.0467365	0.327025	5103.84	9021.2	5712.8	4743.15	6293.21	2843.42	3605.64	4234.56	4267.88	5076.8	6404.59	4777.31
ENSMUSG00000028869	Gnl2	1783.34	1.24551	0.159285	1.9885	0.0467566	0.327025	2397.89	1916.53	1937.13	1960.84	1413.89	1562.79	1606.09	2009.13	1614.13	1602.01	1580.39	1799.32
ENSMUSG00000045232	Rln3	13.9598	4.90964	1.15431	1.98874	0.0467296	0.327025	32.322	17.8006	22.3193	20.6324	0	0	13.653	5.59387	4.15299	21.6621	12.2988	17.0822
ENSMUSG00000101970	1810026B05Rik	1704.44	-1.39122	0.239616	-1.98795	0.0468167	0.327176	931.277	1432.21	1577.23	2154.93	1845.12	2313.02	2221.72	2103.3	1618.28	1733.95	1252.42	1269.77
NA	NA	6.7051	-26.9113	2.3897	-1.98776	0.0468387	0.327176	0	0	0	0	8.2576	0	8.6883	0	0	28.5545	23.5726	11.3881
ENSMUSG00000047507	Baiap3	696.267	-1.52999	0.308913	-1.98608	0.0470248	0.328053	308.069	480.616	896.49	632.725	1029.45	809.282	902.342	805.518	477.593	641	856.814	515.312
ENSMUSG00000026923	Notch1	1030.09	-1.7577	0.409677	-1.98618	0.0470131	0.328053	345.441	989.417	695.617	335.467	1819.43	609.149	706.235	1023.68	1391.25	1339.11	2194.31	911.997
ENSMUSG00000060739	Nsa2	5686.05	1.35349	0.21999	1.98501	0.0471432	0.328481	9032.99	5446.98	6419.58	7725.67	4151.74	6262.09	5849.71	4886.25	5317.21	5373.18	3301.2	4466.03
ENSMUSG00000029598	Plbd2	2917.24	-1.28863	0.184322	-1.98479	0.0471678	0.328481	2639.29	3124.01	2284.93	1972.3	3987.5	2888.26	3111.65	2924.66	3426.21	2973.61	2862.54	2811.91
ENSMUSG00000026832	Cytip	32622.2	1.28071	0.179846	1.98471	0.0471771	0.328481	48339.6	37631.2	28991.8	33502.4	26412.4	31202.2	31058.2	27251.5	36221	33139	26286.6	31431.2
ENSMUSG00000031495	Cd209d	111.781	2.40009	0.636728	1.98372	0.0472871	0.329036	334.331	85.2946	203.663	129.907	11.0101	167.325	73.2299	62.4649	78.9067	89.6022	55.3445	50.2974
ENSMUSG00000029462	Vps29	5.49983	-88.6772	3.26301	-1.98298	0.0473697	0.329337	0	0	0	0	28.4429	0	27.3061	0	0	0	10.249	0
ENSMUSG00000029649	Pomp	9364.52	1.36719	0.227565	1.98279	0.0473912	0.329337	12550	11283.4	10597.9	14262.3	7753.89	11496.2	9135.13	7231.94	8682.51	8689.44	4716.58	5974.96
ENSMUSG00000043873	Chil5	179.617	1.88855	0.462875	1.9817	0.0475124	0.329423	185.851	223.249	264.111	401.185	203.688	234.036	65.7828	65.2618	159.198	138.834	86.0914	128.116
ENSMUSG00000031400	G6pdx	2463.01	1.34345	0.214949	1.98159	0.0475252	0.329423	3970.55	3322.04	2263.54	2350.56	2225.88	2282.39	2077.74	2275.77	1841.16	2829.85	2150.24	1966.35
ENSMUSG00000058715	Fcer1g	6288.65	1.50663	0.298332	1.9821	0.0474682	0.329423	12287.4	9763.63	6285.66	7806.67	6196.87	6104.61	5316	6371.42	3997.94	6465.14	2461.8	2406.69
ENSMUSG00000060716	Plekhh1	4.87494	36.7702	2.6239	1.98196	0.0474841	0.329423	0	0	20.4593	7.64161	0	0	0	0	8.30597	0	16.3984	5.69405
NA	NA	5.33616	-90.5147	3.28123	-1.98099	0.0475923	0.329466	0	0	0	0	0	0	7.44711	49.4125	0	0	7.17428	0
ENSMUSG00000060639	H4c9	199.558	-1.71135	0.391245	-1.98121	0.0475679	0.329466	88.8855	99.3867	239.002	196.389	221.12	314.964	243.272	288.084	209.034	248.129	124.013	122.422
ENSMUSG00000015342	Xk	321.858	-1.79887	0.427699	-1.98058	0.0476384	0.329575	62.6239	187.648	281.781	200.21	359.664	423.233	273.061	261.98	447.138	206.774	607.764	550.425
ENSMUSG00000072294	Klf12	30.6043	-5.05287	1.18058	-1.97962	0.047746	0.330108	12.1207	0.741692	21.3893	3.82081	65.1433	32.8087	75.7123	17.7139	0	12.8003	111.714	13.2861
ENSMUSG00000030224	Strap	4611.3	1.19328	0.128801	1.97924	0.0477888	0.330194	5792.71	4691.2	5480.31	5179.48	3884.74	4953.03	4445.93	4435.01	4082.38	4318.63	3933.56	4138.63
ENSMUSG00000071103	1700029J07Rik	19.6537	-3.57948	0.929739	-1.97878	0.0478405	0.330267	0	6.67523	9.29969	12.9907	29.3604	33.9024	27.3061	13.9847	44.2985	5.90784	24.5975	27.5212
ENSMUSG00000026094	Stk17b	13544.3	1.32544	0.205433	1.97861	0.0478603	0.330267	14532.8	12033.2	18605	17449.6	9238.42	9610.77	13177.7	15218.1	12017.4	12878.1	15371.4	12399.7
ENSMUSG00000027713	1810062G17Rik	40.6127	-3.87439	0.987763	-1.97817	0.0479091	0.330393	18.1811	28.926	0	10.6983	57.8032	74.3665	37.2356	55.0064	125.974	58.0937	15.3735	5.69405
ENSMUSG00000000538	Tom1l2	5.09198	-58.9046	2.97495	-1.97661	0.048086	0.330466	0	0	0	0	11.0101	0	26.0649	0	0	0	4.09959	19.9292
ENSMUSG00000068130	Zfp442	38.871	-3.16143	0.840304	-1.97616	0.0481364	0.330466	1.01006	37.0846	19.5294	6.11329	49.5456	44.8386	48.4062	59.668	33.2239	27.5699	114.789	24.6742
ENSMUSG00000041075	Fzd7	233.704	1.82801	0.440438	1.97592	0.0481637	0.330466	341.401	545.143	236.212	119.973	275.253	153.107	89.3654	161.29	200.728	232.375	227.527	222.068
ENSMUSG00000025872	Thoc3	1003.41	1.33063	0.208555	1.97602	0.0481526	0.330466	1099.96	1112.54	1175.48	1320.47	773.462	1245.64	739.747	780.345	915.041	1130.37	894.736	853.159
ENSMUSG00000030643	Rab30	2185.8	-1.60042	0.343222	-1.9767	0.0480753	0.330466	1450.45	1335.05	1973.39	2640.18	1487.29	2953.88	5303.59	2099.57	2266.15	1436.59	1754.62	1528.85
ENSMUSG00000021257	Angel1	215.169	-1.8064	0.431555	-1.97684	0.04806	0.330466	186.861	172.072	88.3471	66.482	244.976	137.797	201.072	343.091	347.466	142.773	308.494	342.592
ENSMUSG00000045094	Arhgef37	21.3871	3.69752	0.954446	1.9766	0.048087	0.330466	27.2717	40.793	32.5489	18.3399	14.6802	16.4044	0	0.932312	31.8396	14.7696	28.6971	30.3683
ENSMUSG00000031216	Stard8	107.659	2.27899	0.600872	1.97779	0.0479526	0.330466	144.439	156.497	194.364	79.4728	89.9161	51.4004	11.1707	98.8251	91.3657	152.619	176.282	45.5524
ENSMUSG00000071302	2610044O15Rik8	172.644	-1.83834	0.444751	-1.97504	0.0482636	0.330941	71.7144	134.988	106.016	197.918	155.059	201.227	336.361	247.995	268.56	96.4947	91.2159	164.178
ENSMUSG00000066880	Zfp617	181.566	1.56536	0.327565	1.97364	0.0484225	0.331821	186.861	205.449	237.142	207.852	83.4935	166.231	177.49	109.081	281.019	151.634	186.531	186.006
ENSMUSG00000020361	Hspa4	6575.44	1.29551	0.18937	1.97243	0.04856	0.332302	8504.72	7965.03	6062.47	5946.7	6143.66	5272.36	4750.02	5814.83	5924.93	5980.7	8312.95	8226.95
ENSMUSG00000014361	Mertk	1670.65	1.90662	0.472029	1.97237	0.0485676	0.332302	3480.67	3885.72	1280.57	1016.33	1637.76	634.302	968.125	1827.33	1176.68	2498.03	1057.69	584.589
ENSMUSG00000034850	Tmem127	107.568	-1.87056	0.458097	-1.97222	0.0485846	0.332302	83.8352	66.7523	81.8373	52.7271	100.926	75.4601	244.514	112.81	66.4478	166.404	140.411	98.6969
ENSMUSG00000042903	Foxo4	949.83	-1.3682	0.229631	-1.96957	0.0488871	0.333528	793.909	781.001	1036.92	525.743	1390.03	901.147	1058.73	940.703	1085.31	942.3	980.827	961.345
ENSMUSG00000043415	Otud1	437.267	-1.36022	0.225322	-1.96979	0.0488622	0.333528	356.552	354.529	379.427	327.061	498.209	354.334	469.168	605.071	371	472.627	488.876	570.354
ENSMUSG00000026090	2010300C02Rik	85.899	-2.05348	0.526963	-1.96991	0.0488486	0.333528	64.644	65.2689	39.0587	65.7179	71.5659	59.0557	122.877	228.416	56.7575	87.6329	127.087	42.7054
ENSMUSG00000001211	Agpat3	5238.86	1.19642	0.131311	1.97028	0.0488059	0.333528	6803.78	5933.53	5572.38	5168.02	5203.21	4836.01	5052.87	4530.1	4756.55	5423.39	4812.92	4773.51
ENSMUSG00000061666	Gdpd1	277.875	1.82129	0.439249	1.96919	0.0489314	0.33362	751.486	397.547	206.453	292.674	256.903	164.044	242.031	241.469	325.317	227.452	120.938	108.187
ENSMUSG00000023959	Clic5	91.9128	-2.70795	0.729952	-1.9689	0.0489646	0.333637	28.2817	20.0257	31.619	10.6983	88.0811	14.2171	120.395	22.3755	310.09	102.402	305.42	49.3484
ENSMUSG00000032855	Pkd1	2345.23	-1.59394	0.341712	-1.96831	0.0490325	0.33368	1004	2313.34	1577.23	862.738	3795.74	1531.07	1818.34	2031.51	3664.32	2474.4	4317.89	2752.12
ENSMUSG00000038034	Igsf8	1955.74	1.373	0.232345	1.96834	0.0490286	0.33368	2881.71	3299.79	1938.99	1905.05	2163.49	1622.94	1814.61	1700.54	1571.21	1922.02	1126.36	1522.21
ENSMUSG00000031431	Tsc22d3	39.647	-2.81243	0.758043	-1.96799	0.0490694	0.333721	14.1409	34.1178	13.0196	12.2266	79.8235	48.1195	60.8181	18.6462	66.4478	5.90784	52.2698	70.2266
ENSMUSG00000031256	Cstf2	39.7999	2.657	0.716959	1.96636	0.0492571	0.334787	68.6842	74.1692	51.1483	38.2081	31.1954	14.2171	13.653	27.9694	60.9105	64.0016	28.6971	4.74504
ENSMUSG00000037458	Azin1	14.668	-6.22043	1.34219	-1.9647	0.0494485	0.335668	0	11.8671	8.36972	0	14.6802	44.8386	44.6827	22.3755	9.6903	0	7.17428	12.3371
ENSMUSG00000020706	Ftsj3	2546.52	1.2489	0.163203	1.96479	0.0494391	0.335668	3442.29	2857	2601.12	2396.41	2184.59	1945.56	2277.58	2635.65	2429.5	2616.19	2400.31	2772.05
ENSMUSG00000020787	P2rx1	38.6597	-2.51339	0.677302	-1.96313	0.0496309	0.336484	46.4629	9.64199	13.0196	19.8682	101.844	56.8685	45.9239	17.7139	44.2985	42.3395	31.7718	34.1643
ENSMUSG00000035354	Uvrag	3448.09	1.28738	0.185633	1.96319	0.0496236	0.336484	4457.4	3316.85	3616.65	3544.18	3059.9	2812.8	2740.54	2986.2	3714.15	2569.91	4272.8	4285.72
ENSMUSG00000018326	Ywhab	7164.86	1.21748	0.144638	1.9628	0.0496699	0.336538	9818.81	7738.81	6893.86	8527.27	6662.97	6673.3	6372.25	7377.39	5819.72	6462.19	7052.32	6579.47
ENSMUSG00000042851	Zc3h6	125.861	-1.87595	0.462542	-1.96224	0.0497343	0.336763	32.322	87.5196	40.9186	116.917	92.6687	152.014	109.224	168.748	269.944	133.911	148.61	157.535
ENSMUSG00000021661	Ankra2	17.7515	-5.03807	1.18993	-1.96051	0.0499364	0.337289	0	0	3.71988	15.2832	4.58756	17.498	26.0649	48.4802	22.1493	16.7389	33.8216	24.6742
ENSMUSG00000029655	N4bp2l2	77.5	-1.95357	0.492596	-1.96127	0.049848	0.337289	66.6641	34.8595	26.0391	56.5479	82.576	53.5876	78.1947	144.508	121.821	58.0937	131.187	75.9207
ENSMUSG00000046688	Tifa	16.5744	4.91143	1.17101	1.96083	0.0498988	0.337289	40.4025	7.41692	19.5294	42.0289	0	6.56175	16.1354	0	26.3022	10.831	16.3984	13.2861
ENSMUSG00000113035	5830428M24Rik	319.795	-1.57899	0.336111	-1.96067	0.0499174	0.337289	151.509	173.556	255.742	294.966	293.604	499.786	261.89	328.174	508.049	375.148	236.751	458.371
ENSMUSG00000097327	E030030I06Rik	51.6776	-3.38761	0.89833	-1.95949	0.0500557	0.337884	0	43.7598	15.8095	30.5664	54.1332	152.014	48.4062	52.2095	130.127	36.4317	34.8465	21.8272
ENSMUSG00000051527	Usp29	7.82533	24.2147	2.34764	1.95848	0.0501732	0.338466	29.2918	3.70846	11.1596	4.58497	1.83502	0	0	0	0	43.3241	0	0
ENSMUSG00000027739	Rab33b	660.431	-1.39376	0.244609	-1.95816	0.0502112	0.338512	452.508	498.417	559.841	472.252	691.804	741.477	470.409	858.659	919.194	537.613	789.171	933.824
ENSMUSG00000097184	4632428C04Rik	19.3102	-5.15622	1.20867	-1.95778	0.0502559	0.338602	0	2.22508	19.5294	6.11329	42.2055	33.9024	3.72356	63.3972	8.30597	27.5699	1.0249	23.7252
ENSMUSG00000021037	Ahsa1	4738.68	1.23866	0.157795	1.95684	0.0503668	0.338928	5783.62	4682.3	5110.18	6758.24	3979.25	4668.68	4759.95	4624.27	4395.24	3717.01	3794.17	4591.3
ENSMUSG00000085129	5031425F14Rik	29.4565	4.48695	1.10661	1.95709	0.0503369	0.338928	72.7245	13.3505	55.7981	61.8971	8.2576	37.1832	0	0	30.4552	24.616	23.5726	25.6232
ENSMUSG00000005161	Prdx2	18.4099	6.28628	1.35565	1.9564	0.0504178	0.33906	47.4729	34.8595	24.1792	25.2173	11.0101	9.84262	0	0	0	44.3088	4.09959	19.9292
ENSMUSG00000033909	Usp36	1677.18	-1.51032	0.304106	-1.95608	0.0504554	0.339103	1275.71	1895.76	1010.88	782.501	3012.19	1415.15	1334.27	1735.96	2101.41	1603.98	1897.09	2061.25
ENSMUSG00000021549	Rasa1	1026.29	-1.51732	0.307653	-1.9552	0.0505594	0.339591	469.679	846.27	853.712	764.925	1123.95	798.346	1339.24	1192.43	1341.41	627.215	1784.35	1173.92
ENSMUSG00000007950	Abhd8	825.282	-1.28555	0.185435	-1.95423	0.0506737	0.340148	627.249	643.047	848.132	838.285	897.326	1077.22	971.848	855.862	856.899	748.326	665.159	874.037
ENSMUSG00000051166	Eml5	364.307	-1.779	0.42538	-1.9537	0.0507372	0.340363	113.127	455.399	184.134	145.955	596.382	254.815	317.743	430.728	330.855	427.334	616.988	498.229
ENSMUSG00000057506	Bloc1s2	1495.42	1.43032	0.264429	1.95266	0.0508597	0.340763	1454.49	1486.35	2052.44	2719.65	1029.45	1730.11	1501.83	1132.76	1254.2	1594.13	968.528	1021.13
ENSMUSG00000047867	Gimap6	9809.44	-1.36657	0.230729	-1.95275	0.0508494	0.340763	9712.76	6070.75	8535.26	8628.14	7956.66	10701.1	14850.8	11515.9	13450.1	9121.7	8416.46	8753.65
ENSMUSG00000017405	Nek8	318.959	-1.69884	0.391669	-1.95203	0.0509345	0.340842	136.358	143.147	401.747	320.948	365.17	417.765	455.515	464.291	249.179	256.991	173.208	443.187
ENSMUSG00000116097	Gm36738	124.636	-2.01498	0.517736	-1.95227	0.0509056	0.340842	61.6138	56.3686	129.266	68.0103	100.926	157.482	229.619	147.305	235.336	179.204	45.0955	85.4108
NA	NA	318.113	-1.66468	0.376759	-1.9515	0.0509977	0.341055	123.228	264.784	338.509	230.013	432.148	348.866	564.739	247.995	481.746	218.59	245.975	320.765
ENSMUSG00000015932	Dstn	2012.89	1.3237	0.207459	1.95013	0.0511602	0.34186	2766.56	2448.32	2419.78	2592.03	1876.31	2498.93	1403.78	1945.74	1641.81	1949.59	1385.66	1226.12
ENSMUSG00000030055	Rab43	11.5691	9.23816	1.64502	1.94989	0.0511891	0.34186	0	51.1767	12.0896	14.5191	8.2576	0	0	0	13.8433	17.7235	17.4233	3.79603
ENSMUSG00000046245	Pilra	1880.14	1.65778	0.374033	1.94969	0.0512127	0.34186	3856.42	3516.36	1735.32	2106.79	1951.55	1276.26	1473.29	2063.21	1443.85	1859	454.03	825.637
ENSMUSG00000050721	Plekho2	10496.9	1.34007	0.216654	1.94925	0.0512656	0.342002	13465.1	13452.8	9929.28	9514.57	12743.3	7455.24	6588.21	7807.18	11094	10590.8	11730	11592.1
ENSMUSG00000027253	Lrp4	349.358	1.92407	0.48445	1.94893	0.051304	0.342048	549.474	905.606	318.979	246.06	481.693	159.669	109.224	298.34	282.403	355.455	159.884	325.51
ENSMUSG00000022876	Samsn1	4222.71	1.27899	0.182245	1.94795	0.0514206	0.342193	5322.02	3947.28	5275.71	6346.36	3367.27	4595.41	4030.13	4341.78	3064.9	3878.49	2981.43	3521.77
ENSMUSG00000004843	Chmp2b	1549.8	1.31474	0.202629	1.94829	0.0513806	0.342193	1946.39	1678.45	1889.7	1773.62	1260.66	1350.63	1644.57	1288.46	2050.19	1202.24	1265.75	1247
ENSMUSG00000030666	Calcb	20.481	8.31559	1.56852	1.94821	0.0513896	0.342193	28.2817	54.8852	0	48.1422	15.5977	0	0	0	34.6082	36.4317	4.09959	23.7252
ENSMUSG00000038181	Chpf2	49.4432	-3.77825	0.985855	-1.94523	0.0517468	0.344153	49.493	11.1254	0	22.9248	128.452	51.4004	89.3654	45.6833	4.15299	27.5699	75.8424	87.3088
ENSMUSG00000018923	Med11	1229.6	1.38476	0.241562	1.94418	0.0518737	0.344785	1770.64	1416.63	1474	1661.29	894.574	1373.59	1428.6	870.779	1017.48	1214.06	644.661	988.867
ENSMUSG00000022476	Polr3h	432.32	-1.4775	0.289752	-1.94358	0.0519467	0.345058	270.697	266.267	487.304	543.319	575.28	638.677	553.569	549.132	310.09	441.118	257.249	295.142
ENSMUSG00000031536	Polb	1025.7	1.27432	0.179994	1.94299	0.0520175	0.345317	1310.05	1249.01	1149.44	1440.44	967.057	1183.3	784.429	1104.79	905.351	752.265	753.3	708.909
ENSMUSG00000063015	Ccni	4303.54	1.22279	0.149373	1.94264	0.0520602	0.345389	5278.58	4614.81	4280.65	4480.28	3974.66	3259	3423.19	4595.37	4213.9	4298.94	4686.86	4536.26
ENSMUSG00000013033	Adgrl1	496.511	-1.68717	0.388731	-1.9412	0.0522336	0.346328	168.68	577.778	350.598	284.268	799.152	241.691	597.01	693.64	593.877	598.661	581.117	471.657
ENSMUSG00000042082	Arsb	3185.68	1.39999	0.250177	1.94029	0.0523444	0.346759	3304.92	4689.72	2629.95	3225.52	3351.67	2465.03	1962.31	2113.55	2512.56	3700.27	4756.55	3516.08
ENSMUSG00000025745	Hadha	4704.45	1.21122	0.142493	1.94014	0.0523627	0.346759	6230.06	5024.96	4801.43	5180.25	3887.5	4880.85	4311.88	4452.72	4716.41	3994.68	4213.35	4759.28
ENSMUSG00000044367	Slc16a13	181.292	1.7588	0.42006	1.93923	0.0524739	0.347071	329.28	323.378	189.714	248.352	166.987	269.032	119.154	65.2618	94.1343	151.634	132.212	86.3598
ENSMUSG00000052749	Trim30b	367.38	1.50437	0.303771	1.93948	0.0524428	0.347071	350.492	374.554	417.556	586.876	256.903	279.968	373.597	240.537	539.888	442.103	249.05	297.04
ENSMUSG00000021311	Mtr	788.188	1.49442	0.299026	1.93824	0.0525941	0.347654	980.77	1165.94	651.908	685.453	682.628	524.94	343.808	778.481	804.295	662.662	1158.13	1019.23
ENSMUSG00000028603	Scp2	4506.91	1.38425	0.242107	1.9376	0.0526721	0.347957	7719.9	4470.18	4761.44	6048.34	3382.86	4792.26	4526.6	3913.85	4677.65	3984.84	2319.34	3485.71
ENSMUSG00000037095	Lrg1	80.6808	-2.41027	0.655666	-1.93573	0.0529006	0.349254	88.8855	51.1767	56.7281	9.16993	216.533	132.329	50.8886	95.0958	127.358	44.3088	49.1951	46.5014
ENSMUSG00000039801	Cplane1	310.625	-1.8522	0.459531	-1.9351	0.0529776	0.349291	52.5232	308.544	221.333	96.2843	367.922	235.129	297.885	357.076	329.47	336.747	679.507	445.085
ENSMUSG00000030592	Ryr1	726.173	-1.45559	0.279929	-1.93481	0.053014	0.349291	603.007	519.926	738.395	686.217	671.618	820.218	1362.82	854.93	913.657	551.398	502.2	489.688
ENSMUSG00000010554	Mettl16	936.901	1.299	0.195082	1.9346	0.0530397	0.349291	1030.26	866.296	1032.27	1070.59	733.092	691.171	708.717	944.432	804.295	999.409	1079.22	1283.06
ENSMUSG00000038235	F11r	360.644	1.83462	0.452378	1.93529	0.0529545	0.349291	765.627	581.486	365.478	377.496	289.934	231.848	318.985	298.34	228.414	579.953	201.905	88.2578
ENSMUSG00000047777	Phf13	380.345	1.52521	0.314833	1.93437	0.0530674	0.349291	498.971	539.952	313.4	298.023	396.365	169.512	202.313	312.325	445.754	509.059	431.482	446.983
ENSMUSG00000092558	Med20	225.331	-1.87096	0.467433	-1.93349	0.0531758	0.349791	62.6239	235.116	141.355	77.1803	406.458	164.044	228.378	167.816	159.198	355.455	388.436	317.918
ENSMUSG00000027902	Chil6	6.46758	-22.8739	2.33588	-1.93316	0.0532164	0.349846	0	0	0	3.05664	0	10.9362	37.2356	23.3078	0	0	3.07469	0
ENSMUSG00000024382	Ercc3	1342.94	1.26455	0.175332	1.93133	0.0534418	0.350955	1753.47	1504.89	1389.37	1303.66	1336.81	1048.79	1100.93	1217.6	1164.22	1218.98	1497.38	1579.15
ENSMUSG00000073563	Csnk1g3	1580.37	-1.31154	0.202591	-1.93127	0.0534499	0.350955	1523.17	1188.93	1395.88	971.249	1712.99	1561.7	1583.75	1800.29	2120.79	1289.88	1958.58	1857.21
ENSMUSG00000038740	Mvb12b	752.087	-1.33461	0.215701	-1.93053	0.0535409	0.35134	460.588	554.044	791.404	596.046	918.429	902.24	779.464	606.003	826.444	802.481	896.785	891.119
ENSMUSG00000030337	Vamp1	82.9027	-2.85148	0.783879	-1.9285	0.0537929	0.352653	0	45.9849	68.8177	53.4913	146.802	120.299	43.4415	169.681	124.59	63.0169	79.942	78.7677
ENSMUSG00000066279	Chrna10	16.9312	-136.828	3.68153	-1.92752	0.0539146	0.352653	0	0	0	0	47.7106	38.2769	0	0	80.2911	0	36.8963	0
ENSMUSG00000039220	Ppp1r10	6.43597	-45.1468	2.85216	-1.92716	0.0539601	0.352653	0	0	0	0	7.34009	0	21.1002	0	0	10.831	0	37.9603
ENSMUSG00000021686	Ap3b1	2567.99	1.33091	0.214007	1.92709	0.0539688	0.352653	3003.92	2781.34	2389.09	2404.82	1920.35	2041.8	1700.42	2285.1	2522.25	2174.08	4123.16	3469.57
ENSMUSG00000027132	Katnbl1	303.263	1.46193	0.284178	1.92793	0.0538639	0.352653	459.578	364.912	306.89	307.957	154.142	274.5	340.085	217.229	299.015	349.547	303.37	261.926
ENSMUSG00000024424	Ttc39c	194.331	-1.84021	0.456403	-1.92784	0.0538751	0.352653	76.7647	132.763	191.574	153.596	189.925	214.35	379.803	237.74	199.343	61.0476	303.37	191.7
ENSMUSG00000057551	Zfp317	4.98815	53.8927	2.98343	1.92799	0.0538566	0.352653	34.3421	0	0	6.87745	0	0	0	0	0	0	8.19918	10.4391
ENSMUSG00000041930	Fam222a	59.2951	-2.15789	0.576207	-1.92574	0.0541368	0.353537	46.4629	53.4018	16.7394	12.2266	102.761	62.3366	47.165	65.2618	123.205	64.0016	55.3445	62.6346
NA	NA	128.842	-2.10143	0.556775	-1.92425	0.0543232	0.354541	68.6842	41.5347	80.9073	89.4069	127.534	174.98	40.9591	245.198	271.328	140.803	204.98	59.7875
ENSMUSG00000022114	Spry2	744.408	1.65165	0.376272	1.92391	0.0543664	0.354609	662.601	622.279	1428.43	1047.66	533.074	540.251	352.497	850.269	598.03	409.61	1225.78	662.408
ENSMUSG00000021910	Nisch	329.984	-1.55992	0.333717	-1.92222	0.0545784	0.355563	186.861	293.71	256.671	333.174	576.197	253.721	479.098	361.737	371	225.482	404.835	217.323
ENSMUSG00000031532	Saraf	12543.8	-1.27229	0.180719	-1.92245	0.0545492	0.355563	14662.1	9667.21	9282.02	10420.1	12365.3	14496	15845	13313.4	14343	11054.5	11531.1	13546.1
ENSMUSG00000028709	Mob3c	458.048	-1.53737	0.322929	-1.92137	0.0546848	0.355829	448.468	452.432	257.601	225.428	757.864	396.986	399.662	571.507	686.627	423.395	444.806	431.799
ENSMUSG00000025869	Nop16	1106.27	1.31283	0.20435	1.92163	0.0546528	0.355829	1833.26	1179.29	1300.1	1388.48	839.523	1277.35	1186.57	1039.53	805.679	935.407	706.155	783.881
ENSMUSG00000057457	Phex	28.2195	-8.29597	1.59018	-1.91954	0.0549163	0.357121	16.161	0	5.57981	0	0	106.082	40.9591	31.6986	0	24.616	59.4441	54.0935
ENSMUSG00000057132	Rpgrip1	27.6643	-3.29878	0.897532	-1.91852	0.0550452	0.357745	0	12.6088	18.5994	19.8682	76.1534	9.84262	33.512	49.4125	17.9963	36.4317	33.8216	23.7252
ENSMUSG00000056399	Prss34	97.7297	-11.8644	1.86072	-1.91785	0.0551301	0.358081	0	0	3.71988	63.4254	208.275	496.506	70.7476	22.3755	0	142.773	112.739	52.1955
ENSMUSG00000048521	Cxcr6	876.929	-1.58253	0.345395	-1.91731	0.0551984	0.35831	1120.16	383.455	604.48	743.529	1271.67	1423.9	850.212	964.943	429.142	774.911	1151.99	804.759
ENSMUSG00000027314	Dll4	58.5287	1.78208	0.434885	1.91674	0.0552712	0.358568	60.6037	67.4939	52.0783	70.3028	41.288	39.3705	44.6827	15.8493	67.8321	90.5868	69.693	82.5637
ENSMUSG00000006732	Mettl1	518.157	-1.36015	0.231621	-1.9159	0.0553779	0.359045	530.283	404.964	367.338	459.261	489.034	498.693	758.364	650.754	638.175	440.134	456.079	524.802
ENSMUSG00000028799	Zfp362	663.678	-1.3641	0.233997	-1.91433	0.055578	0.359912	573.715	555.527	597.97	384.373	997.335	531.502	713.682	635.837	706.008	720.756	763.549	783.881
ENSMUSG00000063919	Srrm4	5.77569	90.6867	3.39651	1.91456	0.0555488	0.359912	55.5534	0	0	13.7549	0	0	0	0	0	0	0	0
ENSMUSG00000019659	Ccdc12	3495.47	1.33855	0.219777	1.91406	0.0556126	0.35992	4376.6	3924.29	4188.58	5820.62	2881.9	4171.08	3773.2	2854.74	2742.35	3163.65	1809.97	2238.71
ENSMUSG00000050357	Carmil2	1187.77	-1.44909	0.279665	-1.91353	0.0556804	0.360144	700.983	981.258	1133.63	919.286	2012.1	693.358	1242.43	1463.73	1414.78	1234.74	1178.63	1278.31
NA	NA	24.449	-3.10828	0.856084	-1.91116	0.0559838	0.36189	11.1107	4.45015	13.0196	11.4624	34.8654	39.3705	35.9944	13.9847	6.92164	58.0937	7.17428	56.9405
ENSMUSG00000074582	Arfgef2	1427.41	-1.39623	0.252164	-1.90963	0.0561808	0.362608	866.633	1116.25	754.205	764.925	1510.22	869.432	1206.43	1303.37	1998.97	1537.02	3100.32	2101.1
ENSMUSG00000033799	Tasor2	34.817	-9.19204	1.67602	-1.90952	0.0561953	0.362608	0	10.3837	0	0	68.8134	0	0	27.9694	17.9963	27.5699	183.457	81.6147
ENSMUSG00000100150	Gm19585	879.125	-1.44598	0.278615	-1.90963	0.0561803	0.362608	1068.65	557.01	681.667	637.31	734.927	1470.93	1082.31	968.672	945.496	1023.04	751.25	628.244
ENSMUSG00000056952	Tatdn2	193.695	1.59112	0.351144	1.90817	0.056369	0.363448	145.449	250.692	285.501	180.342	186.255	129.048	158.872	68.0588	222.877	223.513	245.975	227.762
ENSMUSG00000090077	Lime1	1665.28	-1.3014	0.199195	-1.90799	0.0563924	0.363448	1220.16	1340.24	1806.93	1696.44	1630.42	1770.58	2627.59	1865.56	1454.93	1418.87	1551.7	1600.03
ENSMUSG00000099968	1700029J03Rik	5.91568	-51.3319	2.97839	-1.90767	0.056434	0.363499	0	0	0	0	2.75253	29.5279	0	0	34.6082	0	4.09959	0
NA	NA	27.1708	-4.62487	1.15864	-1.9069	0.0565331	0.363922	10.1006	13.3505	0	10.6983	26.6078	40.4641	75.7123	15.8493	29.0709	33.4777	70.7179	0
ENSMUSG00000073435	Nme3	1147.81	-1.5132	0.313512	-1.90617	0.0566286	0.364319	826.231	600.029	1202.45	1043.08	816.585	1882.13	1715.32	1143.01	1431.4	1403.11	772.773	937.62
ENSMUSG00000031362	Xlr4c	72.3572	-2.0518	0.544234	-1.90522	0.056751	0.36489	40.4025	20.7674	61.378	67.2462	105.514	34.996	130.324	118.404	53.9888	84.679	47.1453	103.442
ENSMUSG00000070972	Dnajc25	431.011	-1.42147	0.26647	-1.90408	0.0568991	0.365409	318.17	322.636	377.567	308.721	365.17	468.071	570.945	482.938	541.272	279.638	603.665	533.343
ENSMUSG00000023274	Cd4	2043.07	1.41927	0.265283	1.90417	0.0568876	0.365409	3770.56	2093.8	2130.56	2105.26	1741.44	1432.65	1488.18	2451.98	1432.78	1715.24	1674.68	2479.76
ENSMUSG00000049076	Acap2	1334.99	1.49332	0.303901	1.90367	0.0569534	0.365541	1287.83	1966.97	1093.64	1145.48	1202.86	703.201	722.37	1049.78	1187.75	1317.45	2741.6	1600.98
ENSMUSG00000010914	Pdhx	523.416	1.34554	0.225251	1.90094	0.0573101	0.367613	515.132	559.977	698.407	531.092	419.303	404.641	367.391	520.23	595.261	723.71	431.482	514.363
ENSMUSG00000008999	Bmp7	92.0705	-2.22662	0.607958	-1.89957	0.0574899	0.36833	16.161	23.7341	70.6777	129.143	118.359	142.171	107.983	165.952	38.7612	131.942	84.0416	75.9207
ENSMUSG00000024222	Fkbp5	1242.27	1.44341	0.278728	1.89963	0.0574817	0.36833	1901.95	1431.47	1520.5	1420.58	1018.44	966.764	1149.34	1212.01	643.713	706.971	1361.06	1574.4
NA	NA	45.4033	-2.90199	0.809674	-1.89835	0.0576505	0.368689	0	47.4683	31.619	10.6983	60.5558	77.6473	60.8181	62.4649	31.8396	56.1244	42.0208	63.5836
ENSMUSG00000061731	Ext1	738.155	1.3967	0.253949	1.89811	0.057682	0.368689	779.768	765.426	941.129	780.209	712.906	601.493	350.014	672.197	586.955	876.329	777.897	1013.54
ENSMUSG00000037762	Slc16a9	548.069	2.01557	0.532678	1.89831	0.0576547	0.368689	1377.72	1194.12	406.397	443.213	351.407	320.432	146.46	878.238	275.481	635.092	162.959	385.297
ENSMUSG00000115388	Eppk1	15.1013	5.10665	1.23931	1.89813	0.0576793	0.368689	12.1207	27.4426	16.7394	16.8115	12.8452	0	1.24119	0	56.7575	7.87712	12.2988	17.0822
ENSMUSG00000057113	Npm1	685.117	1.45331	0.284206	1.89773	0.057732	0.368785	990.871	633.405	949.498	990.353	446.828	744.758	635.487	625.581	607.72	805.435	358.714	432.748
ENSMUSG00000075286	Gm1968	5.90208	-44.6707	2.88871	-1.89748	0.0577652	0.368785	0	0	0	0	0	19.6852	0	8.39081	15.2276	0	0	27.5212
ENSMUSG00000032320	Rcn2	1229.16	1.28607	0.191389	1.89649	0.057895	0.369396	1707.01	1163.71	1527.94	1250.93	1098.26	1270.79	1124.51	898.749	1328.96	1227.85	1176.58	974.632
ENSMUSG00000020388	Pdlim4	216.429	1.56947	0.343162	1.89495	0.0580987	0.369607	398.975	270.717	198.083	394.307	233.965	279.968	150.183	139.847	139.817	161.481	130.162	99.6459
ENSMUSG00000002797	Ggct	537.28	1.40269	0.257615	1.89506	0.058085	0.369607	781.788	651.947	517.993	716.783	398.2	539.157	536.192	429.796	616.026	562.229	367.938	329.306
ENSMUSG00000031467	Agpat5	1323.31	1.24932	0.169465	1.89501	0.0580917	0.369607	1555.5	1287.58	1602.34	1903.53	1166.16	1384.53	1299.52	1232.52	1182.22	946.238	1232.95	1086.61
ENSMUSG00000026520	Pycr2	1956.84	-1.37626	0.243092	-1.89539	0.0580414	0.369607	1127.23	1360.26	2256.11	1985.29	2030.45	2612.67	2821.21	1798.43	1805.16	2011.62	1576.29	2097.31
ENSMUSG00000041037	Irgq	553.07	-1.77796	0.43809	-1.89509	0.05808	0.369607	106.057	465.041	409.186	320.948	1043.21	296.372	484.062	490.396	1045.17	504.135	748.175	724.093
ENSMUSG00000020419	Hormad2	7.10685	-68.9787	3.22458	-1.89423	0.0581949	0.370002	0	0	0	0	0	0	43.4415	0	0	28.5545	0	13.2861
ENSMUSG00000025735	Rhbdl1	79.2467	-2.03026	0.539567	-1.89349	0.0582934	0.370194	35.3522	33.3761	77.1874	70.3028	163.317	80.9282	64.5416	129.591	132.896	74.8326	56.3694	32.2663
ENSMUSG00000045312	Lhfpl2	225.545	1.9816	0.521021	1.89372	0.0582626	0.370194	461.598	385.68	155.305	119.209	291.769	101.707	79.4359	92.2989	135.664	280.622	328.992	274.263
ENSMUSG00000018599	Mief2	297.549	-1.46328	0.290224	-1.89235	0.0584437	0.370497	193.932	295.193	196.223	220.078	356.912	324.806	408.35	236.807	444.369	354.47	223.428	316.02
ENSMUSG00000026994	Galnt3	821.514	1.71661	0.411924	1.8925	0.0584248	0.370497	1775.69	1605.76	690.037	526.507	1134.96	391.518	515.092	635.837	927.5	667.586	509.374	478.3
ENSMUSG00000086843	E030013I19Rik	56.1919	2.9572	0.826565	1.89245	0.058431	0.370497	146.459	48.21	84.6272	112.332	53.2157	0	52.1298	27.037	33.2239	15.7542	48.1702	53.1445
ENSMUSG00000035310	Lin54	7.62506	13.0109	1.95762	1.89089	0.0586393	0.37152	18.1811	8.15861	0	0	1.83502	0	0	0	15.2276	14.7696	14.3486	18.9802
ENSMUSG00000038065	Mturn	92.1199	-2.59084	0.727539	-1.88776	0.0590578	0.372724	0	43.0181	53.9382	58.8404	96.3387	59.0557	147.701	101.622	170.272	101.418	127.087	146.147
ENSMUSG00000027978	Prss12	136.512	-1.97614	0.520307	-1.88866	0.0589369	0.372724	126.258	69.719	132.986	59.6046	172.492	212.163	198.59	183.665	171.657	158.527	21.5229	130.963
ENSMUSG00000002393	Nr2f6	888.194	-1.38211	0.247307	-1.88782	0.0590498	0.372724	437.357	653.43	914.16	836.756	856.956	1115.5	1179.13	778.481	1061.78	980.701	989.026	855.057
ENSMUSG00000032033	Barx2	21.7925	7.68234	1.55723	1.88896	0.0588978	0.372724	21.2113	80.1027	46.4985	42.0289	20.1853	4.3745	0	0	0	0	8.19918	38.9093
ENSMUSG00000041920	Slc16a6	6.96091	21.4695	2.34258	1.88861	0.0589438	0.372724	0	2.96677	19.5294	20.6324	1.83502	0	0	0	0	0	8.19918	30.3683
ENSMUSG00000028015	Ctso	2431.62	-1.36118	0.235664	-1.88767	0.0590703	0.372724	2496.87	1740.75	1676.73	1415.23	2154.32	2413.63	2841.07	2566.66	4220.82	2260.73	2888.16	2504.43
ENSMUSG00000063511	Snrnp70	844.861	-1.57128	0.345324	-1.88792	0.059037	0.372724	306.049	1007.22	907.65	694.623	1448.75	780.848	1246.15	1106.65	951.034	486.412	661.059	541.884
ENSMUSG00000061130	Ppm1b	240.49	1.4247	0.270617	1.88701	0.0591585	0.373061	359.582	225.474	250.162	237.654	162.4	191.384	143.978	253.589	242.257	258.96	289.021	271.416
ENSMUSG00000036943	Rab8b	5988.02	1.44953	0.283863	1.88676	0.0591925	0.373061	7857.27	9631.61	3785.9	4534.53	5925.29	4245.45	3322.65	4311.01	5782.34	6763.49	8563.02	7133.7
ENSMUSG00000039616	Mocos	254.904	-1.68164	0.397497	-1.88648	0.0592307	0.373085	154.54	218.799	147.865	268.221	429.395	304.028	315.261	279.694	300.399	79.7558	320.793	240.099
ENSMUSG00000046387	Pcdhb17	7.25259	-23.7647	2.42325	-1.8862	0.0592678	0.373101	0	0	0	0	1.83502	13.1235	0	0	42.9142	13.785	15.3735	0
ENSMUSG00000048897	Zfp710	13.9608	10.8481	1.82389	1.88574	0.0593306	0.37328	26.2616	67.4939	15.8095	11.4624	11.0101	0	0	0	0	0	30.7469	4.74504
ENSMUSG00000018882	Mrpl45	889.927	1.28258	0.190444	1.8853	0.0593895	0.373434	1143.39	944.174	1225.7	1326.58	861.543	1076.13	951.989	729.068	567.575	596.691	548.32	707.96
ENSMUSG00000017734	Dbndd2	6.44309	9.22201	1.7003	1.88501	0.0594282	0.37346	13.1308	8.15861	24.1792	6.11329	0.917511	1.09362	3.72356	0	0	1.96928	0	18.0312
ENSMUSG00000073982	Rhog	5108.76	1.28992	0.19495	1.88398	0.0595676	0.373915	8223.93	6016.6	5493.33	5837.43	5786.74	5356.57	3847.68	4830.31	3595.1	4586.45	3311.44	4419.53
ENSMUSG00000029535	Triap1	986.936	1.35301	0.231517	1.88397	0.0595697	0.373915	1651.45	1183.74	1035.06	1221.89	965.222	1106.75	956.954	734.662	859.668	904.884	533.972	688.98
ENSMUSG00000015013	Trappc2l	1579.79	-1.41388	0.26532	-1.88321	0.0596715	0.374121	1479.74	1226.02	1363.33	1532.91	1431.32	2290.05	2515.88	1684.69	2091.72	1298.74	921.383	1121.73
ENSMUSG00000103144	Pcdhga1	6.78699	44.5246	2.90772	1.88344	0.0596405	0.374121	19.1912	0	14.8795	0	0	0	0	0	44.2985	0	3.07469	0
ENSMUSG00000025147	Mob2	10.4349	8.04675	1.59803	1.88257	0.0597589	0.374236	27.2717	36.3429	24.1792	8.40577	0	12.0299	0	0	0	6.89248	8.19918	1.89802
ENSMUSG00000026547	Tagln2	9034	1.26889	0.182492	1.88266	0.0597463	0.374236	11268.3	12419.6	8817.04	10206.1	9433.85	9824.03	6555.94	7845.41	8431.94	8208.94	6460.96	8935.86
ENSMUSG00000002228	Ppm1j	263.307	-1.66205	0.38943	-1.88214	0.0598171	0.374384	86.8653	168.364	258.531	355.335	355.077	358.709	444.344	288.084	297.631	176.25	184.482	186.006
ENSMUSG00000020611	Gna13	166.203	1.78126	0.44281	1.88095	0.0599789	0.3745	244.435	96.4199	272.481	288.089	141.297	99.5198	107.983	156.628	235.336	171.327	110.689	70.2266
NA	NA	788.897	1.32349	0.214907	1.8815	0.0599044	0.3745	1195.91	723.149	982.977	887.191	779.885	726.167	575.91	778.481	805.679	789.681	568.818	652.918
NA	NA	5.80784	-75.5898	3.31786	-1.88077	0.0600034	0.3745	0	0	0	0	16.5152	0	31.0296	0	22.1493	0	0	0
ENSMUSG00000050737	Ptges	40.7496	-3.50369	0.961525	-1.88126	0.0599371	0.3745	0	38.568	12.0896	6.11329	70.6484	16.4044	29.7885	82.9758	95.5187	13.785	60.469	62.6346
ENSMUSG00000028496	Mllt3	289.679	-1.54821	0.335341	-1.88048	0.0600431	0.3745	140.399	210.64	253.882	190.276	247.728	389.33	315.261	279.694	246.41	224.498	507.324	470.708
ENSMUSG00000061119	Prcp	5069.58	1.18325	0.129086	1.88059	0.0600273	0.3745	6647.22	5479.62	5073.91	5515.72	4767.39	5095.2	4577.49	4756.66	4670.72	4534.26	4521.85	5194.87
ENSMUSG00000025364	Pa2g4	5413.42	1.2021	0.14131	1.87925	0.0602109	0.374899	6790.65	5766.65	6811.09	6016.24	5062.83	6030.25	5663.53	4361.36	4590.43	4684.91	4339.42	4843.74
ENSMUSG00000044221	Grsf1	55.5271	-2.17376	0.595931	-1.87973	0.0601448	0.374899	13.1308	56.3686	39.0587	29.8023	50.4631	32.8087	114.189	104.419	85.8284	34.4624	57.3943	48.3994
ENSMUSG00000054850	Smim10l2a	23.0903	-4.04895	1.07348	-1.87945	0.0601836	0.374899	0	16.3172	2.78991	16.8115	37.618	8.749	74.4711	26.1047	9.6903	50.2166	27.6722	6.64306
ENSMUSG00000029821	Gsdme	48.7022	-2.8968	0.817227	-1.87764	0.0604298	0.375659	17.1711	12.6088	22.3193	67.2462	54.1332	155.295	105.501	31.6986	4.15299	63.0169	13.3237	37.9603
ENSMUSG00000051550	Zfp579	156.915	-1.75382	0.431574	-1.87802	0.0603789	0.375659	54.5434	56.3686	166.464	166.587	245.893	127.954	183.695	220.958	191.037	162.466	173.208	133.81
ENSMUSG00000034875	Nudt19	634.28	1.36593	0.239637	1.87734	0.0604716	0.375659	898.955	663.072	952.288	810.011	460.591	845.372	615.628	512.772	430.526	574.045	405.859	442.238
ENSMUSG00000032666	1700025G04Rik	1387.12	1.25856	0.176708	1.87751	0.0604488	0.375659	1517.11	1848.3	1423.78	1911.17	1477.19	1275.17	1280.9	1291.25	939.959	1087.04	1203.23	1390.3
ENSMUSG00000073147	5031425E22Rik	587.501	-1.48684	0.304889	-1.8769	0.0605319	0.375818	450.488	379.746	600.76	613.621	688.134	714.137	911.03	727.203	782.146	501.181	271.598	409.972
ENSMUSG00000052131	Akr1b7	433.3	1.70623	0.410834	1.87621	0.0606261	0.376187	1024.2	706.091	490.094	454.676	339.479	405.735	290.437	531.418	260.254	416.502	189.606	91.1048
ENSMUSG00000051517	Arhgef39	236.599	1.54293	0.333537	1.87586	0.0606744	0.376272	192.922	280.359	438.945	380.552	210.11	254.815	212.243	161.29	175.81	251.083	155.784	125.269
ENSMUSG00000049751	Rpl36al	5123.39	-1.41836	0.268978	-1.87457	0.0608514	0.377154	5052.33	3669.89	4188.58	5022.07	3970.99	8016.27	8080.12	5369.18	6354.07	4961.6	3162.83	3632.8
ENSMUSG00000099974	Bcl2a1d	1895.56	1.3267	0.21764	1.87394	0.060939	0.377265	2816.05	2246.58	2142.65	2699.78	1663.45	2128.19	1726.49	1947.6	1377.41	1778.26	866.039	1354.23
ENSMUSG00000032096	Arcn1	5044.41	-1.28694	0.194194	-1.87414	0.0609116	0.377265	3728.14	4229.13	3336.73	3152.16	4351.76	4710.24	4761.19	4768.78	6038.44	4824.73	8527.15	8104.53
ENSMUSG00000053094	Tmem248	21.4878	-2.85012	0.806642	-1.87322	0.0610374	0.377658	5.05031	4.45015	9.29969	28.274	24.7728	31.7151	45.9239	32.6309	11.0746	8.86175	35.8714	19.9292
ENSMUSG00000037224	Zfyve28	160.935	-1.82796	0.464691	-1.87271	0.0611082	0.37788	53.5333	80.8444	168.324	77.9444	188.09	248.253	107.983	151.035	383.459	180.189	131.187	160.382
ENSMUSG00000038279	Nop2	1399.2	1.30485	0.205142	1.87133	0.0612992	0.378827	2102.95	1660.65	1387.51	1290.67	1498.3	1341.88	1102.17	992.912	1410.63	1453.33	1209.38	1340
ENSMUSG00000051969	Tlr11	2048.31	1.44773	0.285281	1.8711	0.0613312	0.378827	1364.59	1919.5	2874.53	3217.88	1709.32	1780.42	1556.45	1431.1	1604.44	1846.2	3289.92	1985.33
ENSMUSG00000000359	Rem1	45.0969	3.82457	1.03493	1.86997	0.0614874	0.379235	37.3723	43.0181	131.126	132.964	44.0405	7.65537	38.4768	0	2.76866	33.4777	13.3237	56.9405
ENSMUSG00000028121	Bcar3	113.907	-2.0477	0.552981	-1.86987	0.0615024	0.379235	99.9962	12.6088	56.7281	42.0289	97.2562	68.8983	124.119	140.779	210.418	99.4486	139.386	275.212
ENSMUSG00000022295	Atp6v1c1	2308.7	1.22683	0.157717	1.87	0.0614842	0.379235	2946.35	2869.61	2301.67	2857.96	2311.21	2220.06	2508.44	1908.44	2266.15	1854.08	1937.06	1723.4
ENSMUSG00000041025	Iffo2	52.37	-2.41838	0.681664	-1.86901	0.0616211	0.37932	42.4226	45.2432	20.4593	6.11329	57.8032	61.243	91.8477	65.2618	94.1343	13.785	65.5935	64.5326
ENSMUSG00000049233	Apoo-ps	40.7786	-2.84891	0.808052	-1.8692	0.0615949	0.37932	28.2817	3.70846	28.829	22.9248	24.7728	38.2769	107.983	67.1265	51.2202	54.1552	5.12449	56.9405
NA	NA	8.66734	-31.3859	2.65998	-1.8692	0.0615944	0.37932	0	0	0	0	0	0	19.859	0	30.4552	40.3702	13.3237	0
ENSMUSG00000037788	Vopp1	1511.03	1.35349	0.233705	1.8685	0.061692	0.379541	2487.78	1429.24	1922.25	1487.06	1288.19	1253.29	1185.33	1683.76	1079.78	1749.7	1189.91	1376.06
ENSMUSG00000097754	Ptgs2os2	48.9569	2.0732	0.563092	1.868	0.0617616	0.379753	61.6138	110.512	88.3471	56.5479	33.9479	52.494	27.3061	39.1571	22.1493	9.84639	53.2947	32.2663
ENSMUSG00000072825	Cep170b	378.411	-1.53694	0.332211	-1.86647	0.0619762	0.380641	273.727	303.352	239.002	142.898	585.372	249.346	322.708	315.121	563.422	385.979	657.984	502.025
ENSMUSG00000040726	Hesx1	6.11499	13.7783	2.0275	1.8665	0.0619712	0.380641	11.1107	11.8671	0	16.8115	0	0	0	2.79694	12.459	0	4.09959	14.2351
ENSMUSG00000048833	Slc39a9	1054.16	-1.49379	0.310244	-1.86621	0.0620123	0.380646	800.979	746.142	545.892	492.884	1206.53	740.384	609.422	1304.3	1376.02	935.407	2065.17	1826.84
ENSMUSG00000068923	Syt11	472.076	-1.47924	0.302869	-1.86501	0.0621796	0.381457	361.602	410.156	274.341	272.041	441.323	311.683	665.275	532.35	369.616	790.665	605.715	630.142
ENSMUSG00000024350	Dnajc18	368.57	-1.40475	0.263215	-1.8628	0.0624909	0.382933	358.572	265.526	296.66	152.068	395.447	364.177	379.803	365.466	460.981	509.059	475.553	399.533
ENSMUSG00000034243	Golgb1	2070.3	-1.76594	0.440392	-1.86296	0.0624673	0.382933	794.919	1702.92	673.298	665.584	2157.99	905.521	1261.04	2451.05	2501.48	1520.28	7140.46	3069.09
ENSMUSG00000025076	Casp7	1054.14	1.29713	0.201529	1.86237	0.0625506	0.383083	880.774	1303.89	1143.86	1569.59	952.377	964.577	800.565	1059.11	894.276	1074.24	1053.59	952.804
ENSMUSG00000041961	Znrf3	10.3253	-7.89786	1.60181	-1.86131	0.0627004	0.383385	0	0	0	3.05664	15.5977	3.28087	6.20593	0	23.5336	19.6928	43.0457	9.49008
ENSMUSG00000036863	Syde2	34.343	3.23088	0.909508	1.86027	0.0628477	0.383385	37.3723	20.0257	112.526	25.2173	22.0203	10.9362	3.72356	23.3078	88.597	5.90784	49.1951	13.2861
ENSMUSG00000018293	Pfn1	37205.2	1.26564	0.182635	1.86089	0.0627593	0.383385	51148.5	42433.7	38779.7	56468.5	33996.5	43420.2	38584.7	33197.8	28459	32724.5	21297.4	25951.6
ENSMUSG00000063888	Rpl7l1	3684.36	1.27775	0.189987	1.86119	0.0627168	0.383385	5507.87	4163.86	3658.5	4234.22	3294.78	4161.24	3531.17	2759.64	3801.37	2875.15	2806.17	3418.33
ENSMUSG00000038545	Cul7	288.624	1.48032	0.304046	1.86126	0.0627068	0.383385	306.049	367.137	305.96	265.928	135.792	164.044	282.99	259.183	416.683	261.914	414.059	283.754
ENSMUSG00000022808	Snx4	1798.59	1.21274	0.149581	1.86031	0.0628423	0.383385	2317.08	1965.48	1935.27	1844.69	1463.43	1751.99	1908.94	1525.26	1877.15	1608.9	1714.65	1670.25
ENSMUSG00000047123	Ticam1	1010.49	-1.40757	0.265093	-1.86051	0.0628136	0.383385	840.372	927.856	372.918	592.989	1187.26	880.368	804.288	976.131	1549.06	1340.09	1335.44	1319.12
ENSMUSG00000024621	Csf1r	14081.7	1.70726	0.414934	1.85976	0.0629189	0.383388	37271.3	24544.1	9607.51	9486.3	16699.6	7171.99	7911.32	15606.9	9975.47	15757.2	7160.96	7787.56
ENSMUSG00000053192	Mllt11	222.152	1.50701	0.318117	1.85998	0.0628881	0.383388	233.324	388.646	235.282	336.231	163.317	230.755	173.766	224.687	164.735	243.206	108.639	163.229
ENSMUSG00000031701	Dnaja2	5579.22	1.18759	0.133416	1.85909	0.0630141	0.383592	6977.51	6130.08	6229.86	5799.98	4715.09	6008.37	5356.96	5086.69	4691.49	5322.96	4971.78	5659.89
ENSMUSG00000062190	Lancl2	507.525	1.43376	0.27961	1.85903	0.0630233	0.383592	514.122	497.675	735.606	546.375	380.767	465.884	373.597	379.451	294.862	669.555	520.648	711.756
ENSMUSG00000018774	Cd68	1798.83	1.60682	0.368482	1.85683	0.0633353	0.385275	3962.47	2740.55	1475.86	2038.78	2012.1	1612	1388.89	1345.33	1517.22	2064.79	559.594	868.343
ENSMUSG00000080486	Snord100	72.9972	-2.0751	0.567404	-1.85614	0.0634335	0.385656	25.2516	46.7266	58.5881	51.1988	39.453	59.0557	172.525	107.216	145.354	62.0323	56.3694	52.1955
ENSMUSG00000060429	Sntb1	85.1096	-1.88591	0.493253	-1.85557	0.0635154	0.385937	18.1811	78.6193	27.8991	71.067	84.411	115.924	63.3005	107.216	127.358	91.5715	120.938	114.83
ENSMUSG00000040562	Gstm2	9.39956	9.89781	1.78265	1.85517	0.063572	0.385976	30.3019	41.5347	0.929969	29.8023	1.83502	0	0	8.39081	0	0	0	0
ENSMUSG00000024097	Srsf7	1151.5	-1.32098	0.216497	-1.85502	0.063593	0.385976	652.5	1048.75	870.451	1253.99	1121.2	1305.79	1184.09	1445.08	1323.42	1389.33	1062.82	1160.64
ENSMUSG00000060798	Intu	138.295	-2.64325	0.75629	-1.8542	0.0637108	0.386474	0	78.6193	92.9969	22.9248	114.689	84.2091	148.942	166.884	329.47	189.051	268.523	163.229
ENSMUSG00000026502	Desi2	593.411	-1.35866	0.238513	-1.85394	0.0637473	0.386479	418.166	512.509	548.682	395.071	722.999	650.707	493.992	677.791	707.392	460.811	860.914	671.898
ENSMUSG00000042770	Hebp1	3619.36	1.53215	0.332179	1.85309	0.0638697	0.386882	6437.13	5051.66	5094.37	4499.38	2968.15	4834.91	3104.2	2852.87	2102.8	3916.9	1000.3	1569.66
ENSMUSG00000052738	Suclg1	3069.07	1.27415	0.188632	1.85298	0.0638852	0.386882	4143.27	3348	3465.07	3983.57	2197.44	3648.33	3284.18	2597.42	2825.41	2692.99	2135.89	2507.28
ENSMUSG00000054720	Lrrc8c	1997.43	-1.40382	0.264136	-1.85269	0.0639264	0.386915	884.814	1854.97	1404.25	1123.32	2062.57	1801.2	1527.9	2003.54	3460.82	1747.73	2765.17	3332.92
ENSMUSG00000039967	Zfp292	1018.84	-1.59824	0.365365	-1.85152	0.0640947	0.387103	365.642	616.346	505.903	476.837	895.491	512.91	702.511	1029.27	1187.75	1236.71	3550.25	1146.4
ENSMUSG00000026989	Dapl1	225.845	2.21568	0.61991	1.85148	0.0641004	0.387103	521.192	261.075	304.1	462.318	89.9161	227.474	78.1947	303.001	31.8396	276.684	33.8216	120.524
ENSMUSG00000055629	B4galnt4	58.9619	-2.95619	0.844445	-1.85179	0.0640554	0.387103	57.5735	6.67523	58.5881	6.11329	66.9783	85.3027	131.566	96.0281	12.459	20.6774	31.7718	133.81
ENSMUSG00000029379	Cxcl3	15.0662	-9.84428	1.78127	-1.85221	0.0639951	0.387103	9.09056	5.19184	0	0	44.9581	14.2171	32.2708	48.4802	0	26.5853	0	0
NA	NA	442.333	1.60601	0.369296	1.85076	0.0642043	0.387295	443.417	752.075	490.094	404.241	388.107	438.543	147.701	326.309	310.09	691.217	351.54	564.66
ENSMUSG00000039062	Anpep	4321.04	1.48199	0.306637	1.85084	0.0641933	0.387295	3368.56	6647.78	3489.24	4235.75	5037.14	2252.87	2298.68	2382.06	4486.61	4868.06	7725.68	5060.11
ENSMUSG00000031834	Pik3r2	976.394	-1.46074	0.29543	-1.85051	0.0642394	0.387295	384.834	619.313	1235.93	802.369	1204.69	1122.06	1251.11	867.05	1003.64	989.563	1170.43	1065.74
ENSMUSG00000021939	Ctsb	58589.4	1.46625	0.298491	1.84974	0.0643517	0.387757	123908	92759.7	44363.2	54194.3	57637.1	50909.3	49618.9	56821.6	48749.1	59075.4	28693	36343.2
ENSMUSG00000031221	Igbp1	2686.84	1.33146	0.223352	1.84914	0.0644381	0.388061	3811.97	2422.37	2990.78	3894.17	1722.17	2617.04	3079.38	2436.13	2829.57	2312.92	1989.33	2136.22
ENSMUSG00000019188	H13	117.432	-2.37082	0.674272	-1.84701	0.0647454	0.389479	36.3622	114.962	55.7981	28.274	304.614	67.8047	68.2652	117.471	141.202	28.5545	254.175	191.7
ENSMUSG00000015401	Cltrn	56.9142	2.36947	0.67375	1.84722	0.0647157	0.389479	85.8553	69.719	79.0474	166.587	23.8553	62.3366	50.8886	32.6309	17.9963	68.9248	6.14939	18.9802
ENSMUSG00000050271	Prag1	180.447	-1.71493	0.421568	-1.84585	0.0649146	0.390064	166.66	54.1435	131.126	87.1144	255.068	90.7708	168.801	235.875	265.791	218.59	305.42	186.006
NA	NA	8.0238	13.4861	2.03325	1.846	0.0648915	0.390064	0	20.0257	13.0196	18.3399	0.917511	0	0	2.79694	0	0	30.7469	10.4391
ENSMUSG00000028879	Stx12	1749.66	1.29425	0.20163	1.84555	0.0649576	0.390105	2141.33	2554.39	1499.11	1768.27	1687.3	1741.05	1475.77	1249.3	1594.75	1925.95	1835.59	1523.16
ENSMUSG00000031327	Chic1	37.6157	-4.49631	1.17578	-1.84451	0.065109	0.390798	0	5.19184	13.9495	22.9248	43.123	0	18.6178	127.727	49.8358	81.7251	64.5686	23.7252
ENSMUSG00000076432	Ywhaq	4038.51	-1.27524	0.190217	-1.84406	0.065175	0.390978	3543.3	3251.58	3400.9	3638.94	3342.49	4420.43	5342.06	4539.43	5610.68	3632.33	3804.42	3935.54
ENSMUSG00000036840	Siah1a	299.294	1.36885	0.245686	1.84368	0.0652297	0.391089	312.109	290.743	394.307	372.146	226.625	238.41	332.638	204.176	264.407	376.132	281.847	297.989
ENSMUSG00000022228	Zscan26	118.436	-2.40618	0.687258	-1.84318	0.0653024	0.391288	10.1006	117.187	58.5881	47.378	221.12	29.5279	93.0889	218.161	196.575	97.4793	241.876	90.1558
ENSMUSG00000033454	Zbtb1	67.8592	-2.44908	0.701177	-1.84296	0.0653351	0.391288	57.5735	21.5091	22.3193	44.3213	97.2562	59.0557	88.1242	111.877	73.3694	5.90784	147.585	85.4108
ENSMUSG00000021822	Plau	320.488	2.30061	0.65242	1.8424	0.0654167	0.391561	1125.21	729.083	124.616	90.171	340.397	203.414	130.324	224.687	330.855	312.131	71.7428	163.229
ENSMUSG00000005360	Slc1a3	290.978	1.83504	0.475475	1.84198	0.0654781	0.391711	590.886	648.98	214.823	279.683	197.265	101.707	230.861	414.879	197.959	335.762	152.71	126.218
ENSMUSG00000060802	B2m	145416	-1.37409	0.248941	-1.84171	0.0655177	0.391732	142549	108053	110006	133877	124561	193703	218382	142824	213902	141194	107877	108067
ENSMUSG00000048706	Lurap1l	9.47445	16.3521	2.19065	1.84028	0.0657275	0.39277	12.1207	0	21.3893	45.0855	0	0	4.96474	0	8.30597	0	0	21.8272
ENSMUSG00000014226	Cacybp	2619.48	1.26375	0.183536	1.84001	0.0657667	0.392787	3081.7	2382.31	3323.71	3706.18	1849.7	2717.66	2775.29	2545.21	2199.7	2364.12	2247.6	2240.61
ENSMUSG00000024431	Nr3c1	5.00376	46.2808	3.00863	1.83883	0.0659405	0.393069	21.2113	11.8671	0	2.29248	0	0	0	0	0	0	0	24.6742
ENSMUSG00000015854	Cd5l	8825.27	1.64156	0.389003	1.83821	0.0660311	0.393069	20120.4	15710.5	7476.02	7720.32	8709.94	6445.82	6838.93	9089.11	6835.81	10735.5	2858.44	3362.34
ENSMUSG00000001416	Cct3	7588.71	1.21209	0.150916	1.83875	0.0659514	0.393069	9004.7	8107.43	7728.97	9944.03	6120.72	8050.17	7577.44	6952.25	6034.29	6680.78	7028.75	7835.01
ENSMUSG00000041132	N4bp2l1	1281.12	1.36754	0.245516	1.83932	0.0658684	0.393069	1209.04	1363.23	1497.25	2283.31	994.582	947.079	1411.23	1294.05	931.653	908.822	1363.11	1170.13
ENSMUSG00000099517	H3c8	7.09723	-60.8961	3.22499	-1.83823	0.0660284	0.393069	0	0	0	0	0	0	0	38.2248	0	38.4009	0	8.54108
ENSMUSG00000102112	1810041H14Rik	31.4887	-4.53865	1.18717	-1.83821	0.0660315	0.393069	0	14.0921	6.50978	35.1514	14.6802	94.0517	98.0537	47.5479	42.9142	0	15.3735	9.49008
ENSMUSG00000037926	Ssh2	4.79546	-16.0533	2.17907	-1.83785	0.0660846	0.393169	0	0	0	0	4.58756	5.46812	0	0	15.2276	17.7235	4.09959	10.4391
ENSMUSG00000071042	Rasgrp3	6.14202	-39.7403	2.89242	-1.83671	0.0662526	0.393944	0	0	0	0	6.42258	0	18.6178	0	0	0	42.0208	6.64306
ENSMUSG00000024926	Kat5	15.9459	-10.4473	1.84324	-1.83647	0.0662875	0.393944	0	0	0	12.9907	70.6484	6.56175	26.0649	33.5632	8.30597	0	0	33.2153
ENSMUSG00000048271	Rbm33	1742.2	-1.42961	0.280865	-1.83583	0.0663824	0.394291	687.852	1652.49	1225.7	1166.11	2414.89	1217.2	1450.95	1682.82	2025.27	2291.26	3005	2086.87
ENSMUSG00000027358	Bmp2	209.522	-1.69564	0.41514	-1.83512	0.0664882	0.394703	165.65	232.15	100.437	186.455	355.994	103.894	285.473	415.811	123.205	201.851	163.984	179.363
ENSMUSG00000014547	Wdfy2	190.812	1.7752	0.451446	1.83406	0.0666445	0.395414	300.999	307.802	224.123	126.851	167.905	121.392	69.5064	180.869	88.597	155.573	313.619	232.507
ENSMUSG00000091264	Smim13	351.53	-1.51977	0.3293	-1.83375	0.0666904	0.39547	194.942	262.559	325.489	184.163	474.353	313.87	369.873	311.392	358.541	467.704	689.756	265.722
ENSMUSG00000007880	Arid1a	117.347	-2.17758	0.612678	-1.83249	0.066879	0.396371	4.04025	69.719	64.1679	86.3502	189.925	87.49	86.883	124.93	152.276	137.85	247	157.535
NA	NA	26.0707	-2.76045	0.799643	-1.83195	0.0669592	0.39663	15.1509	18.5423	16.7394	1.52832	34.8654	38.2769	9.92948	59.668	47.0672	23.6313	25.6224	21.8272
ENSMUSG00000073437	D330041H03Rik	36.1205	-2.9822	0.861143	-1.83056	0.0671658	0.397636	0	14.8338	17.6694	22.1607	43.123	9.84262	32.2708	78.3142	51.2202	37.4163	81.9918	44.6034
ENSMUSG00000020462	Cfap36	768.453	1.33283	0.226568	1.82944	0.0673334	0.39816	824.211	941.207	844.412	933.041	469.766	942.704	647.899	599.477	892.892	723.71	646.71	755.411
ENSMUSG00000029004	Kmt2e	3696.9	-1.53559	0.338279	-1.82923	0.0673645	0.39816	2109.01	3652.09	1809.72	1577.23	5766.56	2158.81	2653.65	3468.2	6509.11	3755.41	6970.33	3932.69
ENSMUSG00000021958	Pinx1	397.959	1.48843	0.313615	1.82961	0.0673087	0.39816	504.021	436.856	407.326	670.934	200.935	447.292	323.949	385.045	333.623	437.18	219.328	409.023
ENSMUSG00000026470	Stx6	1648.15	1.22595	0.160744	1.82834	0.0674982	0.398732	2263.55	1826.79	1735.32	1921.1	1856.13	1496.08	1472.05	1492.63	1604.44	1522.25	1288.3	1299.19
ENSMUSG00000038618	Rassf7	129.274	-1.8558	0.488151	-1.82739	0.0676415	0.399144	64.644	75.6526	164.605	74.8878	92.6687	252.627	224.655	135.185	188.269	63.0169	136.311	78.7677
ENSMUSG00000029777	Gars	3671.31	-1.22403	0.159587	-1.82748	0.067628	0.399144	3387.75	2729.43	3465.07	3148.34	3037.88	3940.33	4429.79	4174.89	4029.78	3486.61	4124.19	4101.61
NA	NA	6.21393	64.9693	3.29598	1.82698	0.0677026	0.399281	33.3321	16.3172	0	0	0	0	0	0	24.9179	0	0	0
ENSMUSG00000085891	Gm14634	5.02186	45.9162	3.02228	1.82674	0.0677385	0.399281	31.3119	0	0	3.82081	0	0	0	0	0	0	6.14939	18.9802
ENSMUSG00000053113	Socs3	2496.66	-1.40702	0.269934	-1.82506	0.0679915	0.399289	3225.13	2119.01	1962.23	1632.25	4901.35	2809.52	2585.39	2277.64	1906.22	1858.01	2330.62	2352.59
ENSMUSG00000029053	Prkcz	31.3247	-3.88383	1.07203	-1.82595	0.067858	0.399289	26.2616	5.93353	0.929969	25.9815	34.8654	19.6852	76.9535	97.8928	33.2239	0	26.6473	27.5212
ENSMUSG00000005148	Klf5	24.2666	-3.40966	0.968938	-1.82636	0.0677964	0.399289	0	9.64199	19.5294	9.16993	46.7931	5.46812	58.3357	20.5109	24.9179	33.4777	48.1702	15.1841
ENSMUSG00000022555	Dgat1	3114.21	-1.44511	0.29109	-1.82478	0.0680346	0.399289	2109.01	4095.62	2363.98	2705.13	6028.97	4411.68	2101.33	3749.76	2601.15	2823.95	2182.01	2197.9
ENSMUSG00000019055	Plod1	813.689	1.52363	0.332772	1.8256	0.0679099	0.399289	1594.89	1394.38	603.55	698.443	861.543	441.824	613.146	898.749	614.642	765.065	547.295	730.736
ENSMUSG00000014606	Slc25a11	3250.73	1.26975	0.188805	1.82484	0.0680248	0.399289	4389.73	3258.25	3425.08	4323.62	2824.1	3549.91	2942.85	2809.06	3377.76	2932.26	2092.84	3083.33
ENSMUSG00000002379	Ndufa11	1526.62	-1.42427	0.279513	-1.82539	0.0679426	0.399289	1141.37	1114.02	1308.47	1814.12	1383.61	2053.83	2612.7	1611.97	1742.87	1244.58	795.321	1496.59
ENSMUSG00000041426	Hibch	625.137	-1.31701	0.217644	-1.8253	0.0679558	0.399289	476.749	532.535	561.701	525.743	467.013	785.222	758.364	752.376	679.705	799.527	553.445	609.263
ENSMUSG00000043439	Epop	265.369	1.34561	0.234764	1.82421	0.0681201	0.399574	372.713	287.776	362.688	300.315	294.521	237.317	233.343	217.229	261.638	177.235	195.755	243.895
ENSMUSG00000026700	Tnfsf4	115.366	-1.87307	0.496514	-1.82353	0.0682239	0.39975	89.8955	37.0846	104.157	85.5861	133.039	115.924	279.267	65.2618	102.44	83.6944	173.208	114.83
ENSMUSG00000039834	Zfp335	981.677	-1.51835	0.330367	-1.82373	0.0681926	0.39975	319.18	947.882	926.249	651.065	1389.11	818.031	1078.59	1033.93	1471.54	713.864	1310.84	1119.83
ENSMUSG00000025135	Anapc11	125.78	1.63613	0.389673	1.82277	0.068338	0.400202	156.56	185.423	159.025	174.229	73.4009	129.048	96.8125	113.742	84.444	190.035	70.7179	75.9207
ENSMUSG00000033863	Klf9	244.959	-1.55319	0.348592	-1.8223	0.06841	0.400407	174.741	171.331	234.352	154.361	229.378	235.129	289.196	386.909	271.328	293.423	374.088	125.269
ENSMUSG00000036752	Tubb4b	4976.05	-1.3408	0.232267	-1.82157	0.068521	0.40084	3639.25	3180.37	6212.19	4102.78	4535.26	7454.14	6217.1	4767.84	4500.45	5011.81	4544.4	5546.95
ENSMUSG00000031533	Mrps31	361.253	1.37756	0.253856	1.82038	0.0687011	0.401677	354.532	326.344	434.296	580.762	329.387	278.874	359.944	263.844	438.832	331.823	302.345	334.051
ENSMUSG00000020085	Aifm2	55.0678	-3.23503	0.931639	-1.81807	0.0690542	0.402273	0	44.5015	6.50978	42.793	45.8756	88.5836	74.4711	96.0281	132.896	73.848	42.0208	13.2861
ENSMUSG00000034617	Mtrr	4.82073	-44.8964	3.01873	-1.81816	0.0690403	0.402273	0	0	0	0	0	14.2171	0	13.9847	0	0	3.07469	26.5722
ENSMUSG00000003154	Foxj2	605.832	-1.46082	0.300755	-1.81801	0.069063	0.402273	346.451	562.944	500.323	390.486	1060.64	487.757	552.328	528.621	686.627	499.212	890.636	763.952
ENSMUSG00000032596	Uba7	2974.1	-1.24387	0.173082	-1.81898	0.0689143	0.402273	2135.27	2452.77	3332.08	2609.61	3428.74	2702.35	3541.1	3425.31	2790.81	2826.9	3313.49	3130.78
ENSMUSG00000039110	Mycbpap	16.7913	5.82018	1.39674	1.81929	0.0688677	0.402273	16.161	33.3761	24.1792	17.5757	10.0926	5.46812	0	0	0	61.0476	5.12449	28.4703
ENSMUSG00000046733	Gprc5a	322.943	1.55685	0.351207	1.8184	0.0690037	0.402273	682.802	316.702	297.59	444.742	355.994	273.406	239.549	248.927	351.619	230.406	139.386	294.193
ENSMUSG00000067577	A430093F15Rik	139.577	-1.8897	0.504937	-1.81836	0.0690093	0.402273	35.3522	103.095	144.145	191.04	209.193	158.576	337.602	191.124	44.2985	89.6022	52.2698	118.626
ENSMUSG00000003234	Abcf3	2061.61	-1.29066	0.20252	-1.81764	0.0691188	0.402382	2307.99	1549.39	1745.55	1552.01	2032.29	2376.45	2486.09	2338.24	1932.52	1548.84	2288.6	2581.3
ENSMUSG00000029265	Dr1	1415.86	1.25011	0.177361	1.81584	0.0693945	0.40377	1576.71	1489.32	1436.8	1479.42	1180.84	1365.94	1131.96	1106.65	1428.63	1210.12	1980.1	1603.82
ENSMUSG00000021200	Asb2	8.32242	-25.6277	2.57825	-1.81504	0.0695173	0.404051	0	0	3.71988	0	0	44.8386	0	49.4125	0	0	0	1.89802
ENSMUSG00000024817	Uhrf2	1758.71	-1.30648	0.21249	-1.81506	0.069514	0.404051	1191.87	1501.93	1310.33	1445.79	2298.37	1700.59	1314.42	1805.89	1989.28	1726.07	2780.55	2039.42
ENSMUSG00000048677	Tpcn2	13.7855	-9.00632	1.7483	-1.81373	0.0697194	0.405008	0	0.741692	5.57981	6.11329	14.6802	0	28.5473	68.9911	0	30.5238	10.249	0
ENSMUSG00000022466	Rpap3	507.213	-1.38651	0.259989	-1.81337	0.0697753	0.405116	387.864	421.281	501.253	311.778	514.724	480.101	625.557	628.378	365.463	601.615	495.026	753.513
ENSMUSG00000045502	Hcar2	974.138	1.63818	0.392809	1.81282	0.0698596	0.405388	1880.74	2068.58	873.241	824.53	1185.42	664.924	507.645	1088.01	616.026	1098.86	462.229	419.462
ENSMUSG00000029715	Pop7	679.87	1.40417	0.270288	1.81184	0.0700107	0.406047	906.026	813.636	798.843	1010.99	586.29	694.452	732.299	501.584	848.593	469.673	433.532	362.521
ENSMUSG00000027208	Fgf7	5.13649	-42.441	2.98532	-1.81132	0.0700907	0.406194	0	0	0	0	26.6078	0	0	0	0	2.95392	10.249	21.8272
ENSMUSG00000058975	Kcnc1	43.9996	-2.33283	0.674738	-1.81119	0.070111	0.406194	18.1811	42.2764	15.8095	24.4532	94.5037	14.2171	59.5769	67.1265	44.2985	79.7558	18.4482	49.3484
ENSMUSG00000022528	Hes1	425.058	1.71294	0.428776	1.8109	0.0701562	0.406239	753.506	511.767	413.836	545.611	520.229	215.444	147.701	413.947	382.075	707.956	241.876	246.742
ENSMUSG00000015599	Ttbk1	40.0184	-6.93157	1.54267	-1.81062	0.0701999	0.406275	0	0	29.759	0	109.184	6.56175	0	89.502	67.8321	65.9708	56.3694	55.0425
ENSMUSG00000044052	Ccr10	83.8765	-2.90972	0.851237	-1.81017	0.0702696	0.406461	71.7144	0	38.1287	64.9537	96.3387	97.3326	203.554	110.945	24.9179	78.7712	149.635	70.2266
ENSMUSG00000029922	Mkrn1	98.273	1.84078	0.486484	1.80955	0.0703657	0.406799	146.459	122.379	103.227	129.907	43.123	83.1155	52.1298	94.1635	65.0634	206.774	77.8922	55.0425
ENSMUSG00000034723	Tmx4	791.062	-1.31428	0.218012	-1.80848	0.0705312	0.407539	479.78	523.634	547.752	359.156	633.083	691.171	606.94	578.966	1223.75	933.438	1636.76	1278.31
ENSMUSG00000019189	Rnf145	86.6583	-1.73332	0.438897	-1.80803	0.0706011	0.407725	42.4226	49.6933	58.5881	45.8497	92.6687	80.9282	70.7476	96.0281	83.0597	64.0016	141.436	214.476
ENSMUSG00000026433	Rab29	771.183	1.34002	0.233601	1.80759	0.0706701	0.407906	844.412	1088.06	1179.2	1088.93	600.97	848.653	799.323	886.629	607.72	502.166	314.644	493.484
ENSMUSG00000021087	Rtn1	255.585	1.48525	0.31599	1.80608	0.0709053	0.409046	253.526	324.119	278.061	220.843	241.305	191.384	109.224	181.801	278.25	211.697	365.888	410.921
ENSMUSG00000043157	Arl11	142.566	1.60172	0.376437	1.8054	0.0710119	0.409443	269.687	304.094	191.574	155.125	191.76	195.759	86.883	99.7574	48.4515	52.1859	60.469	55.0425
NA	NA	166.138	1.59018	0.370752	1.80496	0.0710811	0.409624	273.727	134.988	175.764	198.682	106.431	78.741	203.554	104.419	142.586	219.575	195.755	159.433
ENSMUSG00000009905	Kdsr	336.47	-1.42811	0.284967	-1.80408	0.0712193	0.410108	178.781	214.349	250.162	355.335	457.838	301.84	307.814	358.94	491.437	451.949	309.519	359.674
ENSMUSG00000032507	Fbxl2	40.6644	-4.07398	1.12334	-1.80394	0.0712409	0.410108	0	0	30.689	43.5572	122.947	51.4004	93.0889	35.4279	9.6903	44.3088	24.5975	32.2663
ENSMUSG00000022426	Josd1	1603.49	-1.26448	0.187739	-1.80329	0.0713434	0.41048	1176.72	1378.8	1507.48	1066.77	1741.44	1630.59	1669.39	1445.08	2162.32	1400.16	1966.78	2096.36
ENSMUSG00000086158	Ccpg1os	60.9512	-2.2398	0.645756	-1.80157	0.0716138	0.411202	10.1006	60.8187	43.7085	61.1329	107.349	63.4302	140.254	83.9081	15.2276	22.6467	44.0706	78.7677
ENSMUSG00000051586	Mical3	342.117	-1.67687	0.413966	-1.80152	0.0716207	0.411202	76.7647	424.989	280.851	254.466	546.837	287.623	467.927	438.187	323.933	231.39	396.635	375.807
ENSMUSG00000030165	Klrd1	1673.89	1.3455	0.237613	1.80184	0.0715713	0.411202	2144.36	1541.24	2557.42	2664.63	1060.64	1678.71	2041.75	1840.38	1317.88	1117.57	1117.14	1005
ENSMUSG00000061410	Zcchc14	51.8614	-2.18119	0.624503	-1.80162	0.071606	0.411202	39.3924	28.1843	29.759	12.9907	111.936	18.5916	32.2708	76.4496	49.8358	85.6636	85.0665	52.1955
ENSMUSG00000075012	Fjx1	39.7687	2.93199	0.862167	1.79998	0.071864	0.41238	143.429	63.0438	51.1483	29.0381	54.1332	27.3406	3.72356	12.1201	2.76866	39.3856	23.5726	27.5212
ENSMUSG00000008845	Cd163	14.9204	9.52751	1.80717	1.79955	0.0719316	0.41255	41.4125	25.9592	0	40.5005	0	0	0	11.1877	24.9179	19.6928	15.3735	0
ENSMUSG00000021643	Serf1	86.8759	-2.02116	0.564532	-1.79827	0.0721344	0.413494	17.1711	53.4018	118.106	45.8497	168.822	115.924	100.536	88.5696	138.433	74.8326	43.0457	77.8187
ENSMUSG00000089929	Bcl2a1b	5711.88	1.38994	0.264229	1.79777	0.0722137	0.41373	9791.54	6746.43	5952.73	8036.68	4806.84	7217.92	4452.13	5485.72	3855.35	5758.17	2345.99	4093.07
ENSMUSG00000090841	Myl6	159.17	-1.58432	0.369719	-1.7956	0.0725576	0.414496	117.167	106.062	130.196	152.068	260.573	135.609	150.183	253.589	203.496	90.5868	117.863	192.649
ENSMUSG00000025352	Gdf11	172.375	-1.64677	0.400862	-1.79524	0.0726156	0.414496	101.006	110.512	172.044	77.1803	190.842	125.767	223.413	218.161	127.358	294.407	292.096	135.708
ENSMUSG00000024925	Rnaseh2c	1791.02	-1.38318	0.260762	-1.79471	0.0726993	0.414496	1513.07	1122.92	2174.27	1720.13	1579.95	2761.4	2858.45	1833.86	1734.56	1665.03	1120.21	1408.33
ENSMUSG00000022760	Thap7	704.572	-1.27788	0.197011	-1.79557	0.0725629	0.414496	595.937	605.22	591.46	716.783	747.772	927.394	783.188	749.579	888.739	677.432	542.171	629.193
ENSMUSG00000039680	Mrps6	556.698	1.36739	0.251477	1.79511	0.0726362	0.414496	853.503	745.4	491.024	839.049	441.323	727.26	544.88	429.796	462.366	403.702	345.391	396.685
ENSMUSG00000027293	Ehd4	3036.9	-1.30531	0.214026	-1.79602	0.0724916	0.414496	2837.26	2713.11	1852.5	1565	3273.68	2582.05	3048.35	2800.67	4402.16	3322.17	4461.38	3584.4
ENSMUSG00000020601	Trib2	672.759	-1.51015	0.331326	-1.79489	0.0726705	0.414496	409.075	343.403	719.796	518.865	866.131	592.745	739.747	807.382	499.743	616.384	616.988	1342.85
ENSMUSG00000049904	Tmem17	30.8872	-3.08337	0.905264	-1.79451	0.0727311	0.414496	0	14.0921	3.71988	33.6231	42.2055	37.1832	54.6122	26.1047	62.2948	26.5853	25.6224	44.6034
ENSMUSG00000077192	Snora17	25.0378	-3.68736	1.04789	-1.79655	0.0724068	0.414496	0	20.7674	5.57981	16.0474	39.453	39.3705	62.0593	16.7816	9.6903	72.8633	10.249	7.59207
ENSMUSG00000084966	2810471M01Rik	4.88926	66.0108	3.36511	1.79626	0.0724525	0.414496	38.3824	0	12.0896	0	0	0	0	0	0	0	8.19918	0
NA	NA	6.01728	-34.7939	2.85394	-1.79428	0.0727683	0.414496	0	0	0	0	8.2576	0	13.653	0	0	0	25.6224	24.6742
ENSMUSG00000030733	Sh2b1	19.4054	-5.62904	1.38967	-1.79387	0.0728333	0.414648	0	0	23.2492	0	26.6078	12.0299	71.9888	19.5786	33.2239	20.6774	11.2739	14.2351
ENSMUSG00000030272	Camk1	593.349	1.51278	0.333072	1.79302	0.0729698	0.415208	1086.83	923.406	650.048	609.036	509.219	498.693	438.138	714.151	279.634	744.387	313.619	353.031
ENSMUSG00000075590	Nrbp2	15.3638	-6.09832	1.45549	-1.79212	0.0731137	0.415228	0	5.93353	0	11.4624	19.2677	17.498	70.7476	0	16.6119	21.6621	4.09959	17.0822
ENSMUSG00000030660	Pik3c2a	740.637	1.69326	0.423837	1.79269	0.0730225	0.415228	898.955	1649.52	452.895	396.6	745.937	434.169	326.432	499.719	826.444	649.862	1357.99	649.122
ENSMUSG00000025484	Bet1l	1310.54	-1.31647	0.221445	-1.7913	0.0732452	0.415228	1353.48	1038.37	1022.04	1085.11	1528.57	1326.57	1849.37	1218.53	1665.35	905.868	1410.26	1322.92
ENSMUSG00000022175	Lrp10	6223.75	-1.24005	0.17335	-1.7906	0.0733568	0.415228	4801.84	5416.57	5616.08	4393.16	8062.17	5394.85	6027.2	5597.6	8503.93	6647.3	7568.87	6655.4
ENSMUSG00000057103	Nat8f1	68.2119	-2.06695	0.584792	-1.79125	0.0732539	0.415228	56.5635	17.0589	78.1174	34.3873	46.7931	76.5537	132.807	127.727	95.5187	64.0016	61.4939	27.5212
ENSMUSG00000059482	2610301B20Rik	245.171	-1.50307	0.328256	-1.79101	0.0732915	0.415228	192.922	218.799	127.406	225.428	186.255	322.619	335.12	306.731	228.414	389.917	210.104	198.343
ENSMUSG00000026347	Tmem163	265.962	-1.74553	0.448745	-1.79092	0.0733068	0.415228	185.851	63.0438	171.114	201.739	211.028	435.263	256.925	181.801	640.944	373.178	268.523	202.139
ENSMUSG00000039704	Lmbrd2	181.84	2.01758	0.565483	1.79073	0.073337	0.415228	224.234	303.352	129.266	64.9537	113.771	138.89	27.3061	77.3819	189.653	146.711	509.374	257.181
ENSMUSG00000007476	Lrrc8a	547.694	-1.57882	0.367579	-1.79239	0.0730702	0.415228	292.918	426.473	324.559	299.551	756.947	187.01	556.051	620.92	967.646	513.982	662.084	964.192
ENSMUSG00000062082	Cd200r4	215.95	-1.4501	0.29933	-1.79118	0.0732641	0.415228	168.68	130.538	268.761	157.417	229.378	238.41	270.578	312.325	175.81	164.435	251.1	223.966
ENSMUSG00000044328	Trp53i13	271.479	-1.61553	0.38662	-1.7899	0.0734693	0.415648	133.328	169.847	208.313	331.646	340.397	259.189	474.133	289.949	260.254	131.942	258.274	400.482
ENSMUSG00000039262	Prrc2b	412.423	-1.81717	0.481596	-1.78925	0.0735746	0.416027	96.966	367.879	348.738	110.803	653.268	189.197	431.933	405.556	499.743	335.762	914.209	595.028
ENSMUSG00000005864	Cnga2	5.51261	-65.3384	3.37295	-1.78771	0.0738228	0.417056	0	0	0	0	0	0	0	41.0217	0	0	6.14939	18.9802
ENSMUSG00000085394	2210414B05Rik	28.1075	-4.40458	1.19655	-1.78764	0.0738337	0.417056	0	0	4.64985	28.274	3.67005	32.8087	62.0593	47.5479	51.2202	42.3395	40.9959	23.7252
ENSMUSG00000032358	Fam83b	7.69482	-18.5592	2.35824	-1.78695	0.0739457	0.417262	0	0	0	0	0	0	9.92948	1.86462	23.5336	34.4624	22.5477	0
ENSMUSG00000005951	Shpk	183.66	-1.66157	0.409945	-1.78694	0.0739471	0.417262	72.7245	148.338	124.616	102.398	75.2359	170.605	268.096	232.146	175.81	238.283	328.992	266.671
ENSMUSG00000018470	Kcnab3	50.2752	-2.31573	0.67826	-1.78614	0.0740768	0.417559	44.4427	34.8595	41.8486	16.8115	53.2157	30.6215	163.836	71.788	40.1455	9.84639	64.5686	31.3173
ENSMUSG00000032415	Ube2cbp	48.2177	2.3655	0.695385	1.78627	0.0740552	0.417559	69.6943	89.003	60.448	97.8126	7.34009	13.1235	76.9535	37.2925	38.7612	47.2627	14.3486	26.5722
ENSMUSG00000059602	Syn3	5.60389	-37.1826	2.92329	-1.78448	0.074346	0.418858	0	0	0	0	0	0	0	23.3078	9.6903	28.5545	0	5.69405
ENSMUSG00000025790	Slco3a1	123.766	1.73263	0.444526	1.78384	0.0744504	0.418943	181.811	178.748	169.254	167.351	115.606	83.1155	42.2003	160.358	143.97	70.894	116.838	55.0425
ENSMUSG00000071724	Smpd5	134.502	-1.62003	0.390185	-1.78383	0.0744515	0.418943	150.499	89.003	93.9269	101.633	153.224	178.261	162.595	209.77	58.1418	188.066	92.2408	136.657
ENSMUSG00000086728	Man2c1os	43.8004	-2.97783	0.882596	-1.78367	0.074477	0.418943	3.03019	19.284	9.29969	43.5572	6.42258	26.247	99.2948	93.2312	98.2873	26.5853	48.1702	52.1955
ENSMUSG00000034235	Usp54	199.082	-1.79979	0.475652	-1.78246	0.0746746	0.419836	84.8452	190.615	90.207	116.152	350.489	71.0856	311.538	135.185	242.257	212.682	362.814	221.119
ENSMUSG00000033161	Atp1a1	16636.3	1.33975	0.2368	1.78192	0.0747623	0.420111	23488	22933.1	15504.4	13229.2	18767.7	13647.3	10701.5	12977.8	13854.4	16794	16410.7	21327.1
ENSMUSG00000092120	Vmn2r90	10.3913	14.1318	2.14626	1.78025	0.0750358	0.42143	42.4226	0	18.5994	18.3399	5.50507	0	0	0	0	28.5545	11.2739	0
ENSMUSG00000028426	Rad23b	4753.34	-1.24595	0.178283	-1.77944	0.075167	0.421808	4769.51	3873.11	3904.01	3612.19	4616.92	4670.87	5781.44	5063.39	5138.63	3803.66	5943.38	5862.97
ENSMUSG00000035198	Tubg1	581.722	-1.47825	0.316904	-1.77936	0.0751811	0.421808	302.009	336.728	836.042	642.66	632.165	1018.16	770.776	709.489	448.522	448.996	384.337	450.779
ENSMUSG00000024410	Rmc1	1306.28	-1.31277	0.220687	-1.77905	0.0752323	0.421877	998.951	930.081	1455.4	1354.09	1503.8	1429.37	1679.32	1608.24	1295.73	930.484	956.23	1533.6
ENSMUSG00000066892	Fbxl12	71.6702	-3.10546	0.919103	-1.7787	0.0752894	0.421979	44.4427	0	70.6777	59.6046	93.5862	126.86	157.631	164.087	27.6866	18.7081	89.1661	7.59207
ENSMUSG00000002372	Ranbp3	6.87833	32.1392	2.81541	1.77817	0.0753764	0.422248	0	24.4758	0	0	0	0	0	0	0	38.4009	9.22408	10.4391
ENSMUSG00000019868	Vta1	1845.13	1.26314	0.189555	1.77792	0.0754168	0.422256	1962.55	2037.43	2118.47	2467.48	1553.35	2052.73	1748.83	1444.15	1877.15	2051	1350.82	1477.61
ENSMUSG00000039193	Nlrc4	180.939	-1.57959	0.371329	-1.77619	0.0757011	0.423629	131.308	137.213	108.806	121.502	213.78	217.631	150.183	206.041	308.705	86.6483	227.527	261.926
ENSMUSG00000022960	Donson	1317.93	-1.33703	0.236037	-1.77528	0.0758521	0.423817	1115.11	1031.69	1424.71	827.587	1559.77	1571.54	1251.11	1497.29	1256.97	944.269	1490.2	1844.87
ENSMUSG00000022665	Ccdc80	22.1161	-4.50675	1.22329	-1.77561	0.0757968	0.423817	14.1409	10.3837	4.64985	0	42.2055	18.5916	0	69.9234	19.3806	54.1552	21.5229	10.4391
ENSMUSG00000028923	Necap2	29.9412	-3.19016	0.942706	-1.77535	0.0758404	0.423817	0	6.67523	29.759	12.9907	39.453	9.84262	26.0649	82.0435	49.8358	38.4009	21.5229	42.7054
ENSMUSG00000028646	Rragc	2552.01	1.25139	0.182591	1.77187	0.0764154	0.426744	3342.3	3560.86	2160.32	2447.61	2288.27	2554.71	2059.13	2296.28	2429.5	2643.76	2415.68	2425.67
ENSMUSG00000001786	Fbxo7	12.6523	-9.58682	1.84076	-1.77158	0.0764637	0.426794	0	0	0	8.40577	38.5355	26.247	0	16.7816	0	6.89248	24.5975	30.3683
ENSMUSG00000029036	Atad3a	1113.03	1.27392	0.197256	1.77067	0.0766152	0.4272	1260.56	1093.25	1656.28	1209.67	1038.62	999.573	1087.28	971.469	834.75	846.79	1228.85	1129.32
NA	NA	320.255	1.718	0.440886	1.77081	0.0765915	0.4272	444.427	527.343	341.299	562.423	263.326	184.823	239.549	403.691	87.2127	108.31	284.922	395.736
ENSMUSG00000087165	2010001A14Rik	64.3401	-1.96205	0.54926	-1.77032	0.0766743	0.427309	26.2616	19.284	63.2379	71.067	53.2157	126.86	93.0889	80.1788	81.6754	40.3702	39.971	76.8697
ENSMUSG00000020275	Rel	6081.5	1.42447	0.288417	1.76975	0.0767696	0.427557	7101.75	8270.6	5205.04	5417.9	6595.99	3109.17	2949.06	5592.94	6363.76	5915.71	10334	6122.05
ENSMUSG00000028214	Gem	2412.33	-1.30135	0.214744	-1.76958	0.0767977	0.427557	2535.26	1475.22	2244.02	2208.43	2601.14	2481.43	3150.13	2779.22	2477.95	1851.12	3080.84	2063.14
ENSMUSG00000041303	Gtf3c3	328.818	-1.48264	0.321128	-1.76928	0.0768476	0.427615	164.64	277.393	297.59	239.182	222.955	348.866	309.055	570.575	287.94	405.671	424.308	397.635
ENSMUSG00000049001	Ndnf	75.1968	-1.9532	0.546045	-1.76879	0.0769297	0.427852	30.3019	38.568	18.5994	38.9722	70.6484	40.4641	35.9944	99.7574	48.4515	115.203	167.058	198.343
ENSMUSG00000035840	Lysmd3	833.212	-1.43082	0.292267	-1.7684	0.0769939	0.42799	380.793	643.047	605.41	422.581	756.029	840.997	470.409	867.982	1263.89	799.527	1772.05	1175.82
ENSMUSG00000012422	Tmem167	3121.23	-1.25558	0.185728	-1.7679	0.0770777	0.428236	2604.95	2613.72	2851.29	3069.64	2589.22	4106.56	3865.05	3428.11	3686.47	3297.56	2566.34	2775.85
ENSMUSG00000020265	Sumo3	9.09044	-9.69896	1.85436	-1.76764	0.0771218	0.428261	0	0	0	7.64161	25.6903	10.9362	16.1354	22.3755	0	0	9.22408	17.0822
ENSMUSG00000084883	Ccdc85c	58.4384	2.40381	0.716159	1.76682	0.0772591	0.428613	45.4528	146.855	71.6076	73.3595	4.58756	64.5238	40.9591	30.7663	63.6791	15.7542	69.693	74.0227
ENSMUSG00000032349	Elovl5	5026.44	1.28384	0.204021	1.76679	0.0772642	0.428613	7544.15	6458.65	3874.25	4893.69	4636.19	4913.66	3703.7	4481.62	5088.79	4708.55	4755.53	5258.46
ENSMUSG00000036052	Dnajb5	5.50171	63.3982	3.38929	1.76626	0.0773525	0.428883	48.483	0	0	0	0	0	0	0	0	0	6.14939	11.3881
ENSMUSG00000040721	Zfhx2	368.02	-1.76239	0.463078	-1.76543	0.0774908	0.429022	122.218	534.018	217.613	142.134	784.472	306.215	377.32	323.512	483.131	341.67	513.474	270.467
ENSMUSG00000019302	Atp6v0a1	6.0371	-57.9245	3.31715	-1.7654	0.0774963	0.429022	0	0	0	0	0	0	0	36.3602	16.6119	0	19.4731	0
ENSMUSG00000027246	Ell3	177.542	1.51639	0.340212	1.76548	0.0774829	0.429022	261.606	238.825	180.414	231.541	144.049	125.767	120.395	210.703	109.362	103.387	194.731	209.731
ENSMUSG00000002980	Bcam	45.6245	-2.82792	0.849798	-1.76482	0.077594	0.4292	0	30.4094	20.4593	37.4439	56.8857	28.4342	84.4006	81.1111	58.1418	80.7404	15.3735	54.0935
ENSMUSG00000078532	Nkain1	4.96589	23.1912	2.57007	1.76474	0.0776079	0.4292	0	0	9.29969	8.40577	0	0	0	0	20.7649	9.84639	11.2739	0
ENSMUSG00000105552	Gm19710	5.21093	39.7255	3.01069	1.76438	0.077668	0.429314	0	0	2.78991	27.5098	0	0	0	0	17.9963	0	0	14.2351
ENSMUSG00000068349	Gml	7.97799	-26.0489	2.66663	-1.76371	0.0777812	0.429458	0	0	0	0	0	16.4044	0	0	34.6082	29.5392	0	15.1841
ENSMUSG00000021140	Pcnx	1024.95	-1.47399	0.317464	-1.76312	0.0778807	0.429458	384.834	880.388	688.177	523.45	1309.29	542.438	824.147	975.198	1428.63	1249.51	2192.26	1301.09
ENSMUSG00000017418	Arl5b	1137.42	1.4412	0.29907	1.76305	0.0778922	0.429458	1197.93	1339.5	1208.96	1046.14	1243.23	678.047	467.927	934.177	998.101	1145.14	2025.2	1364.67
ENSMUSG00000051285	Pcmtd1	1229.74	-1.28775	0.206939	-1.76311	0.0778822	0.429458	862.593	880.388	776.524	878.785	1041.38	1015.98	1125.76	1193.36	1924.22	1159.91	2274.25	1623.75
NA	NA	50.5846	-2.03951	0.583007	-1.76365	0.0777908	0.429458	26.2616	37.8263	45.5685	32.0948	75.2359	27.3406	74.4711	111.877	60.9105	35.447	16.3984	63.5836
ENSMUSG00000060743	H3f3a	11107.7	1.35755	0.250263	1.76216	0.0780427	0.429902	15499.4	11236.6	14683.3	15980.9	8687	14874.4	10917.5	7804.38	8937.22	11501.6	5669.73	7500.01
ENSMUSG00000042179	Pnliprp1	6.54919	55.2297	3.28436	1.7621	0.0780521	0.429902	0	0	9.29969	32.8589	0	0	0	0	0	36.4317	0	0
ENSMUSG00000048799	Cep120	1893.59	-1.29786	0.213508	-1.76168	0.0781235	0.430076	1398.94	1587.96	1121.54	1072.12	2163.49	1531.07	1269.73	1757.41	2934.78	2142.58	2974.25	2769.21
ENSMUSG00000040364	Sec1	45.3069	3.10004	0.927044	1.76074	0.0782819	0.430729	152.519	22.2508	40.9186	68.7745	0	25.1534	35.9944	30.7663	13.8433	68.9248	26.6473	57.8895
ENSMUSG00000042507	Elmsan1	126.984	1.77501	0.470614	1.75903	0.0785723	0.43082	165.65	124.604	257.601	84.8219	76.1534	69.992	114.189	96.0281	85.8284	86.6483	253.15	109.136
ENSMUSG00000047959	Kcna3	150.218	-2.06117	0.593003	-1.75963	0.078471	0.43082	31.3119	102.353	37.1988	29.0381	121.112	29.5279	116.671	145.441	386.228	107.326	484.777	211.629
ENSMUSG00000031402	Mpp1	2505.2	-1.29711	0.21329	-1.75958	0.0784793	0.43082	2178.7	1866.84	2593.68	1668.16	2069.91	2707.81	3124.06	2873.39	3639.4	2288.3	2506.9	2545.24
ENSMUSG00000032278	Paqr5	33.2281	3.72039	1.0775	1.75912	0.0785567	0.43082	114.137	34.8595	49.2884	56.5479	29.3604	0	9.92948	28.9017	0	39.3856	16.3984	19.9292
ENSMUSG00000030942	Thumpd1	1301.72	1.22943	0.169378	1.7593	0.0785264	0.43082	1600.95	1493.03	1347.53	1173.75	1040.46	1272.98	1027.7	1225.06	1590.59	1285.94	1209.38	1353.29
ENSMUSG00000010663	Fads1	978.405	1.36681	0.256105	1.76028	0.0783606	0.43082	1441.36	1292.77	1312.19	796.256	1159.73	746.946	714.923	919.26	593.877	823.159	892.686	1047.71
ENSMUSG00000062545	Tlr12	1105.96	1.40616	0.279565	1.759	0.0785767	0.43082	765.627	1403.28	1298.24	1370.91	999.17	693.358	1092.24	657.28	973.183	1044.7	1823.29	1150.2
ENSMUSG00000010342	Tex14	5.02084	-63.2328	3.40237	-1.75836	0.0786855	0.43098	0	0	0	0	0	0	17.3766	22.3755	0	0	20.498	0
ENSMUSG00000048429	Timm29	1133.56	-1.33702	0.238287	-1.75845	0.0786705	0.43098	1012.08	818.086	923.459	694.623	1158.82	1124.25	1256.08	1070.29	1533.84	786.727	1612.16	1612.37
ENSMUSG00000024319	Vps52	5.07258	64.15	3.41473	1.75808	0.0787334	0.431025	0	48.9517	0	0	0	0	0	0	0	0	7.17428	4.74504
ENSMUSG00000057914	Cacnb2	7.35291	14.993	2.22323	1.757	0.0789174	0.431596	0	26.7009	13.0196	25.2173	0	4.3745	0	0	4.15299	14.7696	0	0
ENSMUSG00000022438	Parvb	724.164	-1.42475	0.290662	-1.75704	0.0789107	0.431596	391.904	641.563	743.045	325.533	898.244	839.904	551.086	704.828	899.814	1097.87	678.482	917.691
ENSMUSG00000003872	Lin7b	16.5016	-9.46288	1.84593	-1.75644	0.0790125	0.431898	0	0	13.0196	0	34.8654	40.4641	47.165	0	0	38.4009	5.12449	18.9802
ENSMUSG00000030559	Rab38	228.436	1.54942	0.359766	1.75595	0.0790976	0.432145	211.103	406.447	245.512	428.694	216.533	121.392	166.319	329.106	145.354	164.435	138.361	167.974
ENSMUSG00000019179	Mdh2	8620.34	1.24544	0.180383	1.75545	0.0791826	0.432173	10166.3	8858.02	10310.6	12178.4	7735.54	9476.26	8312.22	7809.05	8336.43	8289.68	5265.92	6705.69
ENSMUSG00000021665	Hexb	4498.21	1.30378	0.218005	1.75548	0.0791768	0.432173	7005.79	5562.69	4429.44	4677.43	3633.35	3566.31	4299.47	5124.92	4775.93	4516.54	2906.61	3480.01
ENSMUSG00000061607	Mdc1	1010.8	-1.51863	0.343514	-1.75473	0.0793055	0.432627	436.347	921.923	764.435	315.599	1336.81	575.247	935.854	854.93	1328.96	1104.77	1868.39	1686.39
ENSMUSG00000022971	Ifnar2	143.455	-1.72512	0.448671	-1.75339	0.0795352	0.432966	117.167	76.3942	118.106	94.756	168.822	226.38	143.978	161.29	286.556	163.45	107.614	56.9405
ENSMUSG00000038366	Lasp1	4575.47	1.25718	0.188324	1.75329	0.0795526	0.432966	5723.01	5518.93	4252.75	4932.66	5113.29	3600.21	3699.97	3833.67	3762.6	4972.43	5541.62	3954.52
ENSMUSG00000027001	Dusp19	193.604	-1.70475	0.438723	-1.75409	0.0794144	0.432966	57.5735	168.364	134.846	233.833	220.203	260.283	176.248	358.008	285.172	115.203	145.535	167.974
ENSMUSG00000038213	Tapbpl	3534.99	-1.26951	0.196369	-1.7532	0.0795675	0.432966	3600.87	2811.75	2568.57	3175.09	3672.8	4085.78	4035.09	3638.81	4751.02	2692	4153.91	3234.22
ENSMUSG00000064450	Snord68	25.3236	-3.29513	0.981063	-1.75354	0.0795091	0.432966	20.2012	20.7674	0	9.16993	49.5456	16.4044	85.6418	13.9847	11.0746	33.4777	12.2988	31.3173
ENSMUSG00000037742	Eef1a1	274796	1.24915	0.183178	1.7521	0.0797564	0.433558	405418	265467	302493	332175	207796	306144	276777	254436	255064	263949	191926	235912
ENSMUSG00000020108	Ddit4	1944.85	-1.6004	0.387187	-1.75221	0.0797375	0.433558	2159.51	2093.8	1129.91	1989.88	1875.39	1315.63	6362.32	2248.74	1024.4	1187.48	1077.17	874.037
ENSMUSG00000027422	Rrbp1	7403.88	-1.34151	0.242019	-1.75135	0.0798862	0.433985	5405.85	6813.18	4606.14	4513.9	8425.51	5750.28	7136.82	7313.99	9047.97	5970.85	13665	10197.1
ENSMUSG00000021900	Btd	52.1808	-2.32206	0.694248	-1.75068	0.0800014	0.433985	28.2817	16.3172	51.1483	10.6983	33.0304	28.4342	99.2948	85.7727	103.825	19.6928	86.0914	63.5836
ENSMUSG00000025086	Trub1	40.9408	2.04681	0.590403	1.75028	0.0800692	0.433985	59.5937	56.3686	58.5881	44.3213	37.618	24.0597	32.2708	13.0524	11.0746	49.232	48.1702	56.9405
ENSMUSG00000038280	Ostm1	1583.77	-1.34445	0.243974	-1.75025	0.0800753	0.433985	1237.33	1527.14	1149.44	1002.58	1478.11	1409.68	1767.45	1955.06	2162.32	1252.46	2550.97	1512.72
[truncated: 43,948 more rows]
