# Supplementary material for: Impaired iron recycling from erythrocytes is an early hallmark of aging
Source: eLife. 2023 Jan 31;12:e79196. doi: 10.7554/eLife.79196 (PMC9931393; doi:10.7554/eLife.79196)
Supplement: Figure 3—source data 1. [file elife-79196-fig3-data1.xlsx]

## Sheet: Protein_table
Figure 3 - Source Data 1 Related to Figure 3 B
Source data for the volcano plot illustrating 3290 protein groups (in grey) that are significantly more abundant in magnetically-sorted, cell-free aggregates derived from aged versus young spleen
Gene names	Log2 fold change	-Log10 p-value	q-value	Log2 Intensity 1Y	Log2 Intensity 2Y	Log2 Intensity 3Y	Log2 Intensity 4Ag	Log2 Intensity 5Ag	Log2 Intensity 6Ag	Values imputed (when <2 values in Y)	T-test Significant Ag vs Y (Right-sided, S0=1, FDR=0.001)	Log2 iBAQ	Q-value	Score	MS/MS count	Razor + unique peptides	Razor + unique peptides 1Y	Razor + unique peptides 2Y	Razor + unique peptides 3Y	Razor + unique peptides 4Ag	Razor + unique peptides 5Ag	Razor + unique peptides 6Ag	Protein IDs	Majority protein IDs	Protein names
A630001G21Rik	12.5928	6.42591	0	8.39681	8.3454	8.84703	21.2987	20.7719	21.2972	Yes	Yes	30.1724	0.0008394	1.916	3	1	0	0	0	1	1	1	Q8C9T1;Q3UTB2	Q8C9T1;Q3UTB2
Hist1h3a	9.89134	3.51947	0	6.39787	7.37937	NaN	17.5844	16.5349	16.2205	No	Yes	25.6819	0	25.94	57	1	1	1	0	1	1	1	P68433	P68433	Histone H3.1
Nup205	9.39842	1.65278	0.00015019	12.1024	13.5651	10.6986	24.9848	24.331	15.2457	No	Yes	29.4483	0	28.701	9	4	1	4	1	4	3	3	A0A0J9YUD5;B9EJ54;E9Q880	A0A0J9YUD5;B9EJ54
Hmgn2	8.53289	3.86408	0	11.0125	9.82336	8.58058	18.3771	18.1496	18.4883	No	Yes	23.9732	0	91.924	30	4	1	1	1	4	4	4	A3KGL9;F6W687;P09602;Q5XK38;B7ZCQ3	A3KGL9;F6W687;P09602;Q5XK38	Non-histone chromosomal protein HMG-17
Myl1;Myl3	8.11355	2.83187	0	13.3045	9.04415	10.9477	19.2167	18.8006	19.6196	Yes	Yes	27.8622	0	21.586	9	2	2	1	0	2	2	2	A0A087WRZ7;A0A0G2JDM3;E9PWG4;A0A0G2JDW2;P05977;P09542	A0A087WRZ7;A0A0G2JDM3;E9PWG4;A0A0G2JDW2;P05977;P09542	Myosin light chain 1/3, skeletal muscle isoform;Myosin light chain 3
H3f3c;H3f3a	7.97351	3.43539	0	10.2275	11.5897	8.76869	18.5719	17.6885	18.2461	No	Yes	27.4075	0	61.643	85	1	1	1	1	1	1	1	P02301;P84244;E0CZ27	P02301;P84244;E0CZ27	Histone H3.3C;Histone H3.3;Histone H3
Igkv6-13	7.802	3.8516	0	11.2179	10.448	10.905	19.037	17.4586	19.4813	No	Yes	28.5197	0	4.6146	10	4	1	1	1	3	3	4	A0A075B5N7;A0A0G2JGY3;A0A140T8P2;A0A140T8P1;A0A140T8N7;A0A140T8N5;P01634	A0A075B5N7;A0A0G2JGY3
Ighg2b;Igh-3	7.67605	3.78298	0	12.5684	12.441	11.8793	21.0838	18.8852	19.9479	No	Yes	28.2873	0	90.333	34	10	3	3	2	10	10	9	A0A075B5P3;A0A0A6YVP0;P01867;P01863;P01865	A0A075B5P3;A0A0A6YVP0;P01867	Ig gamma-2B chain C region
Ighv1-77	7.64894	2.22793	0.000151679	7.8206	8.34309	NaN	15.9245	13.7939	17.4739	No	Yes	23.1659	0	7.3027	3	1	1	1	0	1	1	1	A0A0B4J1M0;A0A0G2JGS9	A0A0B4J1M0;A0A0G2JGS9
Gpnmb	7.54091	3.70341	0	9.25146	11.3643	9.63805	17.9557	17.7379	17.1829	Yes	Yes	24.6801	0	14.888	19	3	0	0	0	3	3	3	Q8BVA0;Q99P91	Q8BVA0;Q99P91	Transmembrane glycoprotein NMB
Ndufb8	7.46351	1.96251	8.99165e-05	8.34182	14.8506	9.33738	18.2082	17.85	18.862	Yes	Yes	26.0138	0	23.041	14	4	0	4	0	4	4	4	Q9D6J5;E9Q9J5;Q3V406;F6VCY0	Q9D6J5;E9Q9J5;Q3V406	NADH dehydrogenase [ubiquinone] 1 beta subcomplex subunit 8, mitochondrial
Borcs7	7.46275	2.5671	0.000298507	6.94291	9.62492	8.73223	NaN	15.6881	16.1042	Yes	Yes	24.9267	0	2.8368	2	2	0	0	0	0	2	2	Q9CRC6	Q9CRC6	UPF0693 protein C10orf32 homolog
Mocs3	7.44934	3.38108	0	8.87718	11.1122	8.99732	17.8475	16.513	16.9742	Yes	Yes	24.3842	0.0064901	1.2668	3	1	0	0	0	1	1	1	A2BDX3	A2BDX3	Adenylyltransferase and sulfurtransferase MOCS3;Molybdopterin-synthase adenylyltransferase;Molybdopterin-synthase sulfurtransferase
Rrp1	7.42015	4.24543	0	7.4601	8.89428	8.81608	15.4878	15.9371	16.006	Yes	Yes	23.4078	0	18.264	3	2	0	0	0	2	1	2	P56183;A0A1W2P7C5	P56183;A0A1W2P7C5	Ribosomal RNA processing protein 1 homolog A
Rnaseh2b	7.4158	3.43822	0	8.65969	9.31485	6.68638	15.5947	15.5359	15.7777	Yes	Yes	24.0372	0	3.4793	4	3	0	1	0	3	3	3	Q80ZV0;F6WF94	Q80ZV0	Ribonuclease H2 subunit B
Vkorc1	7.40435	3.79676	0	7.58643	6.53194	8.57438	15.3893	14.5264	14.9901	Yes	Yes	26.0176	0	7.3101	3	1	0	0	0	1	1	1	Q9CRC0	Q9CRC0	Vitamin K epoxide reductase complex subunit 1
4932415D10Rik	7.34472	2.25315	0.000148305	13.1935	7.57024	9.67968	17.7108	17.2027	17.5641	Yes	Yes	24.6471	0.0064918	1.2668	4	1	1	0	0	1	1	1	E9Q0G0;A0A1W2P6U8	E9Q0G0;A0A1W2P6U8
Gimap8	7.29227	3.25379	0	8.5208	8.81054	6.24834	14.7673	14.8998	15.7894	Yes	Yes	21.86	0	5.6683	3	1	0	0	0	1	1	1	Q75N62	Q75N62	GTPase IMAP family member 8
Cox20	7.26478	3.14278	0	8.07216	11.0939	9.12421	16.3113	16.5369	17.2364	Yes	Yes	26.283	0	14.328	5	3	0	1	0	3	3	3	Q9D7J4	Q9D7J4	Cytochrome c oxidase protein 20 homolog
Ighg2c	7.19094	3.50722	0	10.6663	11.0593	11.734	18.4319	17.1438	19.4568	No	Yes	26.8311	0	61.44	22	7	2	2	2	7	6	7	F6TQW2;A0A0A6YY53;P01864	F6TQW2;A0A0A6YY53;P01864	Ig gamma-2A chain C region secreted form
Igkv2-137	7.18432	1.65469	0.000270799	NaN	9.72022	9.77004	20.2381	15.5958	14.9545	No	Yes	28.178	0	11.195	6	3	0	1	1	3	2	2	A0A0B4J1H6;P01630	A0A0B4J1H6;P01630	Ig kappa chain V-II region 7S34.1
Ythdf3;Ythdf1	7.17559	3.39445	0	8.36405	9.67643	NaN	16.0243	16.4464	16.1168	No	Yes	24.0043	0	6.0942	10	3	1	1	1	3	3	3	Q8BYK6;A2AWN8;P59326	Q8BYK6;A2AWN8;P59326	YTH domain-containing family protein 3;YTH domain-containing family protein 1
Wdr5	7.14989	3.57241	0	9.31651	9.26098	7.21434	15.4855	15.7826	15.9734	Yes	Yes	23.8513	0	3.6449	6	1	0	0	0	1	1	1	P61965	P61965	WD repeat-containing protein 5
Pepd	7.13533	3.48369	0	11.7601	9.26773	10.6093	17.4675	17.5325	18.0432	No	Yes	25.1024	0	46.204	17	7	2	1	2	6	7	6	Q11136;G3UXC5	Q11136	Xaa-Pro dipeptidase
Nup133	7.10426	5.23273	0	9.16099	8.76659	8.32493	15.816	15.6839	16.0653	No	Yes	21.9414	0	3.3306	5	3	1	1	1	3	3	3	Q8R0G9	Q8R0G9	Nuclear pore complex protein Nup133
Hexim1	7.01299	3.96463	0	7.65434	8.76911	7.64717	14.2315	15.4876	15.3905	Yes	Yes	22.0062	0	4.8848	3	3	0	1	0	2	3	2	Q8R409	Q8R409	Protein HEXIM1
Kat7	6.97382	4.19313	0	8.49311	8.55368	7.92223	16.1246	14.6602	15.1057	No	Yes	22.541	0	26.802	3	4	1	1	1	4	3	4	Q5SVQ0	Q5SVQ0	Histone acetyltransferase KAT7
Supt6h	6.9274	3.59081	0	7.64369	6.00543	7.15538	13.5559	13.2435	14.7872	Yes	Yes	17.7979	0	3.5927	2	2	0	0	0	1	1	2	Q62383	Q62383	Transcription elongation factor SPT6
Stx4	6.90811	3.85102	0	12.7473	12.849	NaN	19.6798	19.2546	20.1844	No	Yes	27.8515	0	19.696	12	7	2	3	1	6	5	6	P70452;D6RJ29	P70452	Syntaxin-4
Abcf2	6.84005	2.86393	0.000271186	7.52763	10.6239	9.59892	15.3221	15.9311	17.0174	Yes	Yes	23.0741	0	9.8427	9	7	0	1	0	5	6	6	Q99LE6	Q99LE6	ATP-binding cassette sub-family F member 2
Rin3	6.79544	3.97498	0	6.7782	8.05079	6.49921	13.805	13.5698	14.3398	Yes	Yes	20.2249	0	4.1229	2	2	0	0	0	1	2	2	Q3U332;P59729	Q3U332;P59729	Ras and Rab interactor 3
Rap1a	6.79392	2.73226	0.00034398	9.40574	11.0394	7.27469	15.8042	15.7666	16.5308	Yes	Yes	25.1326	0.00028703	2.1264	3	1	0	0	0	1	1	1	A0A0G2JDL9;A0A1W2P777	A0A0G2JDL9
Adcy10	6.77466	2.22556	0.000123894	8.70876	11.9493	6.73753	16.4469	15.4333	15.8394	Yes	Yes	21.4713	0.0057486	1.3156	4	1	0	1	0	1	1	1	E9Q9T4;Q8C0T9	E9Q9T4;Q8C0T9	Adenylate cyclase type 10
Tlr7	6.76923	3.13549	0	7.88672	6.96363	9.52638	14.1414	14.8787	15.6643	Yes	Yes	21.6236	0	4.6684	3	4	0	0	1	2	3	3	P58681	P58681	Toll-like receptor 7
Rrs1	6.74045	2.50762	0.000208955	11.5896	9.24087	7.2344	16.4355	15.6602	16.1905	Yes	Yes	23.9835	0	3.5093	7	3	1	1	0	3	2	3	Q9CYH6	Q9CYH6	Ribosome biogenesis regulatory protein homolog
Taf9;Taf9b	6.74016	3.97742	0	8.07113	6.58511	8.0307	14.2427	14.009	14.6557	Yes	Yes	22.7884	0	2.9483	5	2	0	0	0	2	2	2	A0A087WR08;A0A087WQ57;A0A087WNM2;A2AP82;Q6NZA9;Q8VI33;A2AP81	A0A087WR08;A0A087WQ57;A0A087WNM2;A2AP82;Q6NZA9;Q8VI33;A2AP81	Transcription initiation factor TFIID subunit 9B;Transcription initiation factor TFIID subunit 9
Pak1	6.7255	3.92908	0	8.66471	7.7231	9.2635	15.294	14.7522	15.7817	Yes	Yes	21.8581	0	14.351	8	3	0	0	1	3	3	3	G5E884;O88643	G5E884;O88643	Non-specific serine/threonine protein kinase;Serine/threonine-protein kinase PAK 1
Gosr2	6.67332	2.68642	0.000293501	9.081	10.2106	7.58856	15.9574	14.0488	16.8939	Yes	Yes	23.3506	0	10.298	9	2	0	1	0	2	2	2	A2A9I0;O35166	A2A9I0;O35166	Golgi SNAP receptor complex member 2
Igkv16-104	6.64705	2.17666	0.000112721	8.31187	7.82987	7.56012	NaN	12.8989	16.1964	Yes	Yes	25.7645	0	15.683	1	1	0	0	0	0	1	1	A0A0B4J1I1	A0A0B4J1I1
Hist2h2ac;Hist2h2aa1	6.64111	3.38947	0	15.075	16.9008	14.7226	21.8316	22.0316	22.7586	No	Yes	31.0502	0	21.195	29	3	2	3	3	2	2	2	Q64523;Q6GSS7	Q64523;Q6GSS7	Histone H2A type 2-C;Histone H2A type 2-A
Mgst1	6.59857	2.16573	0.000108696	8.89081	13.6511	9.0885	17.119	16.7811	17.5261	Yes	Yes	26.4592	0	14.817	6	3	0	1	0	3	3	3	D3YU60;E9QJW0;Q91VS7;A0A0N4SV17;D3YVR3	D3YU60;E9QJW0;Q91VS7	Microsomal glutathione S-transferase 1
Ndufa7	6.59719	3.46388	0	10.9118	13.1141	11.5034	18.3895	18.0811	18.8502	No	Yes	27.9384	0	8.9269	18	5	2	3	2	5	5	5	Q9Z1P6	Q9Z1P6	NADH dehydrogenase [ubiquinone] 1 alpha subcomplex subunit 7
Nop10	6.59593	2.37453	0.000152009	13.0498	8.7443	12.5598	18.0209	17.8831	18.2376	No	Yes	28.2636	0	9.7379	11	3	2	1	2	3	3	3	Q9CQS2	Q9CQS2	H/ACA ribonucleoprotein complex subunit 3
Ncoa5	6.58493	1.8001	0.000144689	NaN	12.4717	7.93144	16.3883	16.6827	17.2885	No	Yes	24.2069	0	13.517	10	5	0	3	1	4	5	5	Q91W39;B7ZC24;B7ZC23	Q91W39;B7ZC24;B7ZC23	Nuclear receptor coactivator 5
Ngdn	6.5816	4.14489	0	7.54748	8.18836	NaN	14.3441	14.3779	14.6266	No	Yes	22.7254	0	5.677	5	2	1	1	0	2	2	2	Q9DB96	Q9DB96	Neuroguidin
Arf5	6.57625	3.81031	0	11.3699	12.9224	11.3287	18.5499	18.0508	18.7491	No	Yes	27.0052	0	23.971	10	3	1	1	1	3	3	3	P84084;D3YV25;E9Q2C2	P84084	ADP-ribosylation factor 5
Eif1ax	6.57433	2.54056	0.000209895	11.6901	14.1747	10.0296	18.1769	18.5594	18.8812	No	Yes	27.2366	0	19.403	20	6	2	5	1	6	6	6	Q8BMJ3	Q8BMJ3	Eukaryotic translation initiation factor 1A, X-chromosomal
Parp3	6.57306	3.68802	0	NaN	9.01805	9.9497	16.2609	15.8699	16.04	No	Yes	22.9244	0	21.377	13	6	0	1	2	6	5	4	Q3ULW8;A0A5H1ZRP0;A0A5H1ZRL5;A0A5H1ZRL8	Q3ULW8;A0A5H1ZRP0
Lsm1	6.56898	5.42393	0	8.06179	7.6924	7.72943	14.5906	14.0241	14.5758	Yes	Yes	22.2025	0	13.503	5	2	0	0	0	2	2	2	Q8VC85;A0A1B0GR26	Q8VC85;A0A1B0GR26	U6 snRNA-associated Sm-like protein LSm1
Parp2	6.565	3.90837	0	7.99792	9.65993	8.50663	15.0716	15.0976	15.6903	Yes	Yes	22.4246	0.0072539	1.2576	1	2	0	0	0	2	2	2	O88554	O88554	Poly [ADP-ribose] polymerase 2
Tut1	6.53953	3.04686	0.000337553	7.82996	10.5643	8.72081	16.0929	14.8612	15.7795	Yes	Yes	22.4333	0	3.3664	4	2	0	0	0	1	2	2	Q8R3F9	Q8R3F9	Speckle targeted PIP5K1A-regulated poly(A) polymerase
Htt	6.51762	3.31117	0	9.05386	NaN	7.97564	15.0319	14.6326	15.4326	No	Yes	19.8204	0.0057516	1.3165	2	2	1	0	1	2	2	2	G3X9H5;P42859	G3X9H5;P42859	Huntingtin
Flad1	6.50523	2.34295	0.000139165	9.91807	8.58683	13.105	16.8752	16.6206	17.6298	Yes	Yes	24.0381	0	3.6507	4	2	0	0	1	2	2	2	Q8R123	Q8R123	FAD synthase;Molybdenum cofactor biosynthesis protein-like region;FAD synthase region
Tmed3	6.49898	3.1119	0.000368664	8.64713	7.65626	10.4115	15.1624	15.1288	15.9206	Yes	Yes	24.0464	0.0027034	1.6278	3	1	0	0	0	1	1	1	Q78IS1	Q78IS1	Transmembrane emp24 domain-containing protein 3
Ptp4a2;Ptp4a1	6.48649	2.44719	0.000169082	7.79996	11.5616	8.15944	14.8415	15.7481	16.3909	Yes	Yes	23.9666	0	3.8311	7	3	0	1	0	2	3	3	O70274;Q63739	O70274;Q63739	Protein tyrosine phosphatase type IVA 2;Protein tyrosine phosphatase type IVA 1
Ighg3	6.46926	2.94579	0.000262295	10.6337	10.9236	8.24713	17.055	15.7138	16.4433	Yes	Yes	24.6679	0	11.938	7	4	0	0	0	4	4	3	A0A075B5P5;A0A1Y7VJN6;P03987	A0A075B5P5;A0A1Y7VJN6;P03987	Ig gamma-3 chain C region
Lipe	6.4605	3.4865	0	10.7148	8.84861	8.7914	15.5354	15.8799	16.321	Yes	Yes	22.4161	0	26.193	10	6	0	1	0	5	5	5	P54310;E9Q4M2;A0A0U1RNR0	P54310;E9Q4M2	Hormone-sensitive lipase
Vcpip1	6.44154	2.86521	0.000218579	8.08557	11.3611	9.02862	15.8439	15.895	16.0611	Yes	Yes	21.1893	0	3.2116	6	4	0	1	0	3	4	4	A0A0R4J0M9;Q8CDG3	A0A0R4J0M9;Q8CDG3	Deubiquitinating protein VCIP135
Hpf1	6.43499	3.65017	0	9.49053	10.6394	8.59929	15.7347	16.1158	16.1838	Yes	Yes	23.1949	0	4.8368	8	4	0	1	0	3	4	4	Q8CFE2;D6RIJ8	Q8CFE2	UPF0609 protein C4orf27 homolog
Bid	6.43153	4.5383	0	8.38448	8.81341	7.71864	14.6771	14.4797	15.0543	Yes	Yes	23.8088	0	43.02	4	3	0	0	1	3	3	3	P70444	P70444	BH3-interacting domain death agonist;BH3-interacting domain death agonist p15;BH3-interacting domain death agonist p13;BH3-interacting domain death agonist p11
Ighg1	6.42764	2.51426	0.000185676	NaN	9.03366	8.56793	14.2501	14.8405	16.5947	No	Yes	23.9371	0	5.9011	5	2	0	1	1	2	2	2	A0A075B5P4;A0A0A6YWR2;P01868;P01869	A0A075B5P4;A0A0A6YWR2;P01868;P01869	Ig gamma-1 chain C region secreted form;Ig gamma-1 chain C region, membrane-bound form
Ogfr	6.42242	3.95549	0	7.4552	8.84647	8.58833	15.2472	14.352	14.5581	Yes	Yes	20.1666	0	6.0761	4	2	0	0	0	2	2	2	Q99PG2	Q99PG2	Opioid growth factor receptor
Ccdc90b	6.41977	3.5851	0	9.36091	9.84769	9.0827	15.0669	15.4818	17.0019	No	Yes	23.8852	0	5.6029	7	4	1	1	1	3	4	4	Q8C3X2	Q8C3X2	Coiled-coil domain-containing protein 90B, mitochondrial
Wbscr22	6.41299	2.60413	0.000215716	NaN	11.2395	9.08771	16.1514	16.6021	16.9763	No	Yes	25.7153	0	7.3252	6	2	0	1	1	2	2	2	D3YYK7;Q9DCT4;Q9CY21;F6VT90	D3YYK7;Q9DCT4;Q9CY21;F6VT90	Probable 18S rRNA (guanine-N(7))-methyltransferase
Cd300a	6.4059	3.13638	0.000363636	10.0825	9.73804	7.59009	15.5813	15.0754	15.9716	Yes	Yes	24.4427	0.0052549	1.3543	3	1	0	0	0	1	1	1	Q6SJQ0	Q6SJQ0	CMRF35-like molecule 8
Syne3	6.38821	2.88253	0.000221607	9.43669	7.9871	8.09534	16.4805	13.6423	14.561	Yes	Yes	20.8024	0	2.4667	2	2	0	0	0	1	1	1	Q4FZC9;REV__Q640L3;REV__D3Z7R9	Q4FZC9;REV__Q640L3;REV__D3Z7R9	Nesprin-3
Ppm1b	6.37397	3.50285	0	9.97009	10.5646	8.53023	15.9559	15.6813	16.5496	No	Yes	22.3873	0	10.344	6	4	2	1	1	4	3	3	Q99NF7;P36993	Q99NF7;P36993	Protein phosphatase 1B
Apoc1	6.36191	2.74182	0.000283976	7.52925	6.99533	10.2617	14.5953	14.2167	15.0601	Yes	Yes	25.1131	0.0034834	1.542	3	1	0	1	0	1	1	1	P34928	P34928	Apolipoprotein C-I;Truncated apolipoprotein C-I
Ddx24	6.35295	2.27044	0.000121422	8.13848	11.6918	7.03269	15.3194	15.1486	15.4538	Yes	Yes	21.7758	0	3.2047	3	2	0	1	0	1	2	2	F8WJA0;Q9ESV0;A0A1Y7VLU4;A0A1Y7VKX7	F8WJA0;Q9ESV0;A0A1Y7VLU4;A0A1Y7VKX7	ATP-dependent RNA helicase DDX24
Aga	6.34276	2.39393	0.000144928	11.2533	13.5406	9.14338	17.2055	17.6578	18.1022	No	Yes	25.4851	0	32.744	11	5	1	3	1	5	5	5	Q64191;B7ZNK6	Q64191;B7ZNK6	N(4)-(beta-N-acetylglucosaminyl)-L-asparaginase;Glycosylasparaginase alpha chain;Glycosylasparaginase beta chain
Dst	6.33564	3.11731	0.000343348	11.0209	10.3259	9.88839	15.2946	17.1287	17.8189	No	Yes	20.2008	0.0065036	1.2788	2	2	1	1	1	1	2	2	E9Q9X1;S4R1P5;Q91ZU6;A0A087WPR7;A0A087WSP0	E9Q9X1;S4R1P5;Q91ZU6;A0A087WPR7;A0A087WSP0	Dystonin
Pacs1	6.331	3.43118	0	NaN	9.80205	9.08667	15.9929	15.2314	16.1017	No	Yes	20.3577	0	4.2216	6	3	0	1	1	3	3	3	Q8K212	Q8K212	Phosphofurin acidic cluster sorting protein 1
Hrg	6.31414	2.14833	9.8661e-05	7.80682	6.3058	11.156	14.0572	14.4296	15.7242	Yes	Yes	22.4552	0.00084034	1.9351	4	2	0	0	0	1	1	2	Q9ESB3;A0A0R4J039;A0A338P6H8	Q9ESB3;A0A0R4J039;A0A338P6H8	Histidine-rich glycoprotein
Cmss1	6.31257	2.95175	0.000243161	8.51438	8.97243	7.26449	13.8012	13.8267	16.0612	Yes	Yes	21.807	0	3.564	3	3	0	0	0	2	2	3	Q9CZT6	Q9CZT6	Protein CMSS1
Ppp2r1b	6.29666	4.89847	0	9.78109	8.99775	9.18127	15.379	15.547	15.9241	Yes	Yes	20.4105	0	6.225	6	4	0	0	0	2	4	3	Q3TTF6;H3BKU1;G3UWS4;Q7TNP2;H3BIV7;H3BLQ0;H3BLE7	Q3TTF6;H3BKU1;G3UWS4;Q7TNP2;H3BIV7;H3BLQ0;H3BLE7	Serine/threonine-protein phosphatase 2A 65 kDa regulatory subunit A beta isoform
Acss1	6.28238	2.53306	0.000184941	11.0517	13.1106	9.26133	17.2741	16.8658	18.1308	No	Yes	23.8188	0	21.567	12	6	1	2	1	6	6	6	Q99NB1	Q99NB1	Acetyl-coenzyme A synthetase 2-like, mitochondrial
Hdgfrp3	6.26111	3.59323	0	10.6511	10.2503	8.77172	15.7871	16.1369	16.5324	Yes	Yes	25.2091	0.00028686	2.113	5	2	0	0	0	1	2	2	Q9JMG7	Q9JMG7	Hepatoma-derived growth factor-related protein 3
Med22	6.26046	2.792	0.000279441	9.69012	7.94815	8.10367	14.9377	NaN	14.7445	Yes	Yes	22.9373	0	2.8303	5	2	0	0	0	2	1	2	A2ALA4;Q62276	A2ALA4;Q62276	Mediator of RNA polymerase II transcription subunit 22
Nxt1;Nxt2	6.25843	1.94573	0.000166316	7.65918	10.7753	7.30916	14.5043	NaN	15.175	Yes	Yes	23.8518	0.002439	1.6443	3	1	0	0	0	1	1	1	Q9QZV9;Q3UNA4	Q9QZV9;Q3UNA4	NTF2-related export protein 1;NTF2-related export protein 2
Arhgef7	6.2507	3.10698	0.000322581	8.4947	11.2404	9.56847	15.9079	15.7992	16.3485	Yes	Yes	22.6713	0	12.588	8	4	0	1	0	3	4	4	D3Z0V2;A0A0R4J0X8;Q9ES28;A0A1B0GRS3	D3Z0V2;A0A0R4J0X8;Q9ES28	Rho guanine nucleotide exchange factor 7
Tmem192	6.24808	4.05821	0	7.33789	7.56777	8.75341	14.1303	13.878	14.3951	Yes	Yes	22.497	0	2.4421	3	1	0	0	0	1	1	1	Q9CXT7	Q9CXT7	Transmembrane protein 192
Ubfd1	6.20693	2.67797	0.000236088	7.36153	9.65492	10.554	15.4829	14.5571	16.1511	Yes	Yes	25.2065	0.0045105	1.4513	3	1	0	0	0	1	1	1	A0A0U1RQ55;Q78JW9	A0A0U1RQ55;Q78JW9	Ubiquitin domain-containing protein UBFD1
Lgmn	6.20424	3.57873	0	11.8154	13.0922	11.1154	17.8284	18.3517	18.4556	No	Yes	26.0001	0	30.629	17	4	1	1	1	3	4	4	O89017	O89017	Legumain
Mcts1	6.19635	3.6147	0	9.12585	7.87148	9.73801	15.0107	14.7622	15.5515	Yes	Yes	23.7859	0	3.4116	4	2	0	0	0	2	1	2	Q9DB27	Q9DB27	Malignant T-cell-amplified sequence 1
Daxx	6.19372	3.6813	0	8.75386	8.76019	8.00155	NaN	14.5017	14.8961	Yes	Yes	21.7298	0	2.8714	2	1	0	0	0	0	1	1	Q3UKR0;O35613	Q3UKR0;O35613	Death domain-associated protein 6
Tec	6.19047	3.52674	0	9.33582	9.43975	10.1094	NaN	15.4804	16.1572	Yes	Yes	23.9781	0.0099795	1.167	2	1	0	0	0	0	1	1	D6RJM5;Q8CFK4;Q3U436;P24604	D6RJM5;Q8CFK4;Q3U436;P24604	Non-specific protein-tyrosine kinase;Tyrosine-protein kinase Tec
Nudt21	6.18747	1.75986	0.000240132	8.20603	14.1419	8.28115	16.5101	16.1878	16.4936	Yes	Yes	23.7406	0	19.02	11	4	0	2	0	4	4	4	Q9CQF3;A0A1D5RLS2;A0A1D5RM23	Q9CQF3;A0A1D5RLS2;A0A1D5RM23	Cleavage and polyadenylation specificity factor subunit 5
Babam1	6.18571	2.6657	0.000220126	9.7665	9.36418	8.52129	16.2493	NaN	14.5568	Yes	Yes	22.5268	0.00056497	1.9893	3	1	0	0	1	1	0	1	Q3UI43	Q3UI43	BRISC and BRCA1-A complex member 1
Rab44	6.18547	2.67442	0.000223642	9.73266	8.16533	NaN	15.9036	14.9656	14.5342	No	Yes	21.7748	0	4.1982	4	3	1	1	0	3	3	2	Q8CB87;A0A2Y9CZI3	Q8CB87;A0A2Y9CZI3	Ras-related protein Rab-44
Rps15	6.18394	3.40308	0	13.6803	14.2799	12.1008	19.4173	19.2959	19.8997	No	Yes	26.041	0	11.068	16	4	3	4	2	4	4	4	D3YTQ9;P62843	D3YTQ9;P62843	40S ribosomal protein S15
Cpped1	6.18082	3.31296	0.000357143	8.21745	7.13933	8.25647	14.0982	14.0056	NaN	Yes	Yes	22.4176	0	2.2852	1	1	0	0	0	1	1	0	D3Z7F7;Q8BFS6	D3Z7F7;Q8BFS6	Serine/threonine-protein phosphatase CPPED1
Igkv14-126	6.17305	2.95511	0.00022792	12.6522	12.7425	12.6306	17.1382	19.3145	20.0918	No	Yes	29.4193	0	5.4734	3	2	1	1	1	2	2	2	A0A140T8P9;P01638;P01637;A0A075B5K0	A0A140T8P9;P01638;P01637;A0A075B5K0	Ig kappa chain V-V region L6;Ig kappa chain V-V region T1
Ngly1	6.16829	4.1571	0	9.0116	9.69377	8.37005	15.4345	14.7951	15.3507	Yes	Yes	21.8438	0	7.5724	7	3	0	1	0	3	3	3	Q9JI78;A0A286YCI0;A0A286YDI5	Q9JI78;A0A286YCI0;A0A286YDI5	Peptide-N(4)-(N-acetyl-beta-glucosaminyl)asparagine amidase
Igkv12-41	6.16072	2.50708	0.0001649	9.78369	11.7984	NaN	16.4341	17.6762	16.745	No	Yes	26.441	0	12.782	7	3	1	2	0	3	3	3	P01635;A0A140T8P6	P01635	Ig kappa chain V-V region K2
Itgb2l	6.12516	4.71869	0	12.4216	12.7878	12.1739	18.9851	18.1189	18.6548	No	Yes	25.0894	0	53.232	34	13	4	5	4	12	12	12	D3YXH8;Q3UV74	D3YXH8;Q3UV74	Integrin beta;Integrin beta-2-like protein
Rab35	6.1232	3.35698	0	10.9699	12.6165	10.3788	17.3878	17.2063	17.7407	No	Yes	25.9127	0	2.8123	6	3	1	1	2	3	3	3	Q6PHN9;S4R1W7	Q6PHN9	Ras-related protein Rab-35
Zc3h18	6.1166	2.68509	0.000229508	9.67792	10.8922	7.68506	16.4315	15.0817	15.0917	Yes	Yes	22.3016	0	2.5112	6	3	1	0	0	3	2	2	H3BIW0;G3X8T2;Q0P678;H3BKL4;H3BJJ9	H3BIW0;G3X8T2;Q0P678	Zinc finger CCCH domain-containing protein 18
Nemf	6.10142	3.6597	0	9.15717	10.7284	9.03656	15.4608	15.705	16.0606	No	Yes	21.5326	0	13.64	11	6	1	1	1	5	5	6	Q8CCP0;A0A1Y7VM23	Q8CCP0	Nuclear export mediator factor Nemf
Igkv8-28	6.09114	3.37173	0	10.6992	11.9419	9.97873	17.3136	16.2408	17.3389	No	Yes	26.7244	0	31.614	7	3	1	2	1	3	3	3	A0A075B5N3;A0A0G2JE47;A0A140T8M4;A0A0G2JFN8	A0A075B5N3;A0A0G2JE47
Srsf9	6.08483	2.98276	0.000229226	11.079	10.8079	8.40136	16.2665	15.974	16.3021	No	Yes	24.0488	0	9.9166	10	3	2	1	1	3	3	3	Q9D0B0;F6RTE1	Q9D0B0	Serine/arginine-rich splicing factor 9
Adss	6.0779	1.95314	0.000162551	NaN	12.2743	8.67252	16.7135	15.9882	16.9522	No	Yes	24.14	0	15.626	13	4	0	2	1	4	3	4	P46664	P46664	Adenylosuccinate synthetase isozyme 2
Ndufa3	6.0655	2.09675	8.56269e-05	9.81617	12.3794	7.26337	16.1832	15.23	16.2423	Yes	Yes	25.9701	0.00056402	1.9834	3	2	0	1	0	2	2	2	Q9CQ91;D3Z670	Q9CQ91;D3Z670	NADH dehydrogenase [ubiquinone] 1 alpha subcomplex subunit 3
Igkv12-47	6.06247	2.65001	0.000208333	10.2602	9.99268	9.94608	14.6991	15.5208	18.1664	No	Yes	26.6068	0	3.4745	3	2	1	1	1	2	2	2	A0A140T8N3;A0A075B666	A0A140T8N3;A0A075B666
Hnrnpk	6.03262	2.15921	9.38967e-05	10.67	7.63585	8.83057	NaN	14.7748	15.3813	Yes	Yes	22.0667	0	3.9652	4	1	1	1	0	1	1	1	B2M1R6;H3BKD0;H3BKI8;H3BLP7;Q8BT23;H3BJS9	B2M1R6;H3BKD0
Gstt2	6.0319	3.0348	0.000213904	8.59668	9.72258	NaN	15.0039	14.7843	15.7864	No	Yes	23.6038	0	7.4703	8	3	1	1	0	3	3	3	Q61133;A0A1W2P7J9;A0A1W2P6L1	Q61133;A0A1W2P7J9;A0A1W2P6L1	Glutathione S-transferase theta-2
Ppp1r10	6.02963	3.72176	0	8.10598	9.45254	7.63407	14.4099	14.4164	14.4552	Yes	Yes	23.5036	0.0013782	1.7921	3	1	0	0	0	1	1	1	S4R164;Q80W00	S4R164;Q80W00	Serine/threonine-protein phosphatase 1 regulatory subunit 10
Hmgn5	6.02369	3.42026	0	7.56425	9.68529	8.40753	14.7293	14.1609	14.838	Yes	Yes	21.7713	0	3.7415	2	2	0	0	0	1	1	2	Q9JL35	Q9JL35	High mobility group nucleosome-binding domain-containing protein 5
Ago2	6.00726	3.05448	0.000245399	8.62521	11.3643	9.67337	16.1735	15.7634	15.7478	Yes	Yes	22.2941	0	12.064	10	7	1	1	0	4	6	5	Q8CJG0	Q8CJG0	Protein argonaute-2
Pdlim5	6.00213	3.1622	0.00030303	8.44056	7.98235	10.0932	15.3133	14.0358	15.1734	Yes	Yes	21.6611	0	5.2231	3	3	0	0	0	2	1	2	Q8CI51;Q9CRA2;D9J303;F8WJI6;E9Q8P5;D9J2Z9;D9J300;D9J301;D9J302	Q8CI51	PDZ and LIM domain protein 5
Mrps6	6.00178	3.36949	0	8.67456	8.27306	7.72984	14.5115	13.0574	15.1139	Yes	Yes	23.4164	0.0013774	1.7912	3	2	0	0	0	2	1	2	P58064;A0A338P7H3	P58064;A0A338P7H3	28S ribosomal protein S6, mitochondrial
Rtfdc1	5.99984	4.494	0	9.35406	8.98806	9.67724	14.7808	15.6807	15.5575	No	Yes	20.3449	0	27.669	7	2	1	1	1	2	2	2	Q99K95	Q99K95	Protein RTF2 homolog
Cpsf1	5.98888	3.91356	0	11.0629	12.2627	10.7154	17.227	17.2082	17.5724	No	Yes	23.1704	0	3.4992	6	3	1	2	1	2	3	3	A0A2R8VK76;Q9EPU4	A0A2R8VK76;Q9EPU4	Cleavage and polyadenylation specificity factor subunit 1
Igkv4-55	5.98592	3.99996	0	10.1662	10.4925	10.5544	16.3111	15.6653	17.1945	Yes	Yes	25.9516	0	15.743	3	1	0	1	0	1	1	1	A0A0B4J1I9;P04945	A0A0B4J1I9;P04945	Ig kappa chain V-VI region NQ2-6.1
Igkv5-39;Igkv5-43;Igkv5-45	5.981	2.18313	9.52381e-05	11.6303	14.782	10.6519	18.1934	17.2854	19.5285	No	Yes	28.9325	0	33.581	7	2	1	2	1	2	2	2	A0A075B5M7;A0A0G2JDV4;A0A0B4J1J2;A0A0B4J1J1	A0A075B5M7;A0A0G2JDV4;A0A0B4J1J2;A0A0B4J1J1
Mrpl23	5.97653	2.6575	0.00020202	9.14593	10.9078	7.42797	15.0391	14.7948	15.5774	Yes	Yes	24.0599	0	19.814	7	3	0	1	0	3	3	3	O35972;A0A1B0GQZ1;A0A1B0GSZ9	O35972;A0A1B0GQZ1;A0A1B0GSZ9	39S ribosomal protein L23, mitochondrial
Pecr	5.97584	4.53073	0	9.5052	9.09831	8.75903	15.171	14.6173	15.5018	No	Yes	23.5902	0	3.5213	5	2	1	1	1	2	2	2	Q99MZ7;Q3UXD9;D6RHN4	Q99MZ7;Q3UXD9;D6RHN4	Peroxisomal trans-2-enoyl-CoA reductase
Ddx54	5.9721	4.83425	0	9.37783	9.80737	8.98195	15.5094	15.0606	15.5135	No	Yes	21.8095	0	25.679	7	3	1	1	1	3	3	3	Q8K4L0	Q8K4L0	ATP-dependent RNA helicase DDX54
Palm	5.97115	2.27885	0.000110759	7.06095	10.3996	6.22832	14.484	13.3618	13.7565	Yes	Yes	22.3689	0	3.386	1	2	0	1	0	2	1	1	Q3UZP7;Q9Z0P4	Q3UZP7;Q9Z0P4	Paralemmin-1
Bloc1s5	5.96487	3.27809	0.000352423	14.1923	14.4906	12.466	19.1911	19.6018	20.2505	No	Yes	22.9631	0	2.8616	3	2	1	1	1	2	2	2	Q8R015;Q3TB02	Q8R015;Q3TB02	Biogenesis of lysosome-related organelles complex 1 subunit 5
Brk1	5.95939	3.09336	0.000258065	10.9146	12.1186	9.52994	16.6305	16.5256	17.2853	No	Yes	26.335	0	4.1129	5	3	1	1	1	3	3	3	Q91VR8	Q91VR8	Protein BRICK1
Tmem258	5.95887	4.62993	0	10.4197	10.5874	9.81278	16.1187	15.9355	16.6422	Yes	Yes	27.3162	0.00028927	2.176	5	1	0	1	0	1	1	1	P61166	P61166	Transmembrane protein 258
Prg2	5.95204	2.44107	0.000137931	12.5446	13.9247	10.8429	17.158	18.198	19.8122	No	Yes	27.5098	0	10.783	6	3	1	1	1	3	3	3	Q61878	Q61878	Bone marrow proteoglycan;Eosinophil granule major basic protein
Golm1	5.94833	3.33289	0	7.13138	8.77836	7.562	12.9467	13.8145	14.5555	Yes	Yes	21.4887	0	2.4012	2	1	0	0	0	1	1	1	Q91XA2	Q91XA2	Golgi membrane protein 1
Igha	5.94669	3.61833	0	14.4863	15.017	13.9128	20.1322	19.7789	21.345	No	Yes	27.9643	0	90.078	36	6	3	3	3	6	6	6	A0A0A6YXW6;A0A075B6A3;P01878	A0A0A6YXW6;A0A075B6A3
Huwe1	5.94519	2.43073	0.000135659	NaN	9.50032	7.2472	14.7059	13.768	14.4829	No	Yes	18.8731	0	12.727	9	5	0	1	1	5	4	4	Q7TMY8;A2AFQ0;F6XP90	Q7TMY8;A2AFQ0	E3 ubiquitin-protein ligase HUWE1
Lmbrd1	5.94449	4.71353	0	9.14628	9.80124	9.8227	15.4631	15.2242	15.9164	Yes	Yes	24.023	0	16.779	3	1	0	0	0	1	1	1	Q8K0B2	Q8K0B2	Probable lysosomal cobalamin transporter
Heatr1	5.94404	3.33407	0	8.7815	8.41906	10.3564	15.7754	14.8293	14.7844	Yes	Yes	20.3502	0	7.6024	5	4	0	0	1	4	4	3	G3X9B1;A0A1Y7VNI1;A0A1Y7VNG8	G3X9B1;A0A1Y7VNI1
Nr3c1	5.94108	3.77536	0	9.11047	10.1322	8.43235	15.0276	14.9797	15.491	Yes	Yes	20.9408	0	4.1601	5	3	1	0	0	2	3	2	E9PUR6;P06537;E9PYV1;E9Q310;D6RIL1;D3Z473;A3KN90	E9PUR6;P06537;E9PYV1	Glucocorticoid receptor
Fam50a	5.92415	3.08133	0.000216216	7.62002	9.00248	8.21572	14.4319	NaN	13.9752	Yes	Yes	21.4743	0	2.8525	2	1	0	0	0	1	0	1	Q9WV03	Q9WV03	Protein FAM50A
Mrrf	5.92156	2.52656	0.000155556	8.5744	12.1854	9.87144	15.7338	15.849	16.8132	Yes	Yes	23.5349	0	26.689	6	3	0	1	0	3	3	3	Q9D6S7	Q9D6S7	Ribosome-recycling factor, mitochondrial
Pde2a	5.91535	3.102	0.000253968	9.55354	10.5774	8.11381	15.7914	14.7678	15.4316	Yes	Yes	19.9898	0	14.148	7	4	0	1	0	4	3	3	Q5PR72;A0A1B0GRJ9;F7D3W5;Q922S4	Q5PR72;A0A1B0GRJ9;F7D3W5;Q922S4	cGMP-dependent 3,5-cyclic phosphodiesterase
Mlkl	5.90229	5.03478	0	7.98618	8.53547	7.9171	14.2303	13.746	14.1693	Yes	Yes	21.2456	0	2.9512	4	2	0	1	0	2	2	2	Q9D2Y4;D3YV42	Q9D2Y4;D3YV42	Mixed lineage kinase domain-like protein
Pycrl	5.88825	3.13843	0.00027027	11.7708	12.3122	9.98014	16.9079	17.0442	17.7758	No	Yes	25.3759	0	14.351	13	5	1	1	1	5	5	4	Q9DCC4	Q9DCC4	Pyrroline-5-carboxylate reductase 3
Pstpip1	5.88241	3.12021	0.000225352	9.42413	10.2218	NaN	16.3401	15.5702	15.2058	No	Yes	23.2919	0	5.3766	7	4	1	1	0	3	3	3	A0A0R4J0P5;P97814	A0A0R4J0P5;P97814	Proline-serine-threonine phosphatase-interacting protein 1
Fam65b	5.88066	2.50208	0.000146751	NaN	10.2724	8.45618	15.3468	14.4989	15.8893	No	Yes	22.4531	0	18.424	6	4	0	2	1	3	3	4	A0A5F8MPY8;A6PW28;Q80U16	A0A5F8MPY8;A6PW28;Q80U16	Protein FAM65B
Riok1	5.87557	2.01501	0.000167462	7.54095	7.31607	7.27754	11.552	11.8619	16.3473	Yes	Yes	21.7419	0	27.089	3	2	0	0	0	1	1	2	Q922Q2;A0A286YDE8;A0A286YCL3;A0A286YCS3	Q922Q2;A0A286YDE8;A0A286YCL3;A0A286YCS3	Serine/threonine-protein kinase RIO1
Gpx4	5.87489	2.25925	0.000104556	13.9837	14.9549	10.6698	18.6946	19.1893	19.3491	No	Yes	27.4851	0	14.991	19	6	5	5	1	5	6	5	S4R1E5;O70325	S4R1E5;O70325	Glutathione peroxidase;Phospholipid hydroperoxide glutathione peroxidase, mitochondrial
Grcc10	5.87213	2.74249	0.000225806	7.15945	8.11475	10.039	14.9146	13.4246	14.5904	Yes	Yes	23.4169	0	6.6483	4	3	0	1	0	3	2	3	O35127	O35127	Protein C10
Nop16	5.86547	2.88818	0.000290456	10.785	12.1883	9.36379	16.7856	16.0333	17.1146	No	Yes	24.2129	0	4.9923	11	4	2	2	2	4	3	4	D3Z7M5;Q9CPT5	D3Z7M5;Q9CPT5	Nucleolar protein 16
Napa	5.86314	2.08121	8.06452e-05	10.9538	14.5767	9.71911	17.5433	17.2268	18.069	No	Yes	25.5148	0	45.51	27	8	1	6	1	8	8	8	Q9DB05;A0A1B0GR35	Q9DB05	Alpha-soluble NSF attachment protein
Selk	5.8572	2.67265	0.000196906	10.2896	8.30405	6.9109	14.1917	14.1264	14.7581	Yes	Yes	23.8602	0	3.4591	3	1	0	0	1	1	1	1	Q9JLJ1	Q9JLJ1	Selenoprotein K
Cpa3	5.83633	2.92935	0.0003125	9.09198	9.64673	7.4006	14.2537	13.842	15.5526	Yes	Yes	22.1788	0	7.852	4	2	0	1	0	1	2	1	P15089	P15089	Mast cell carboxypeptidase A
Clec12a	5.83568	2.86521	0.000272374	10.1589	7.62055	8.10965	13.7423	14.455	15.1988	Yes	Yes	22.8683	0.0011074	1.8345	5	2	0	0	0	2	2	2	A0A0R4J0T2;Q504P2	A0A0R4J0T2;Q504P2	C-type lectin domain family 12 member A
Ppme1	5.83523	3.63664	0	9.98544	9.35677	8.23289	15.1067	14.6265	15.3476	Yes	Yes	22.9986	0	7.8467	5	3	0	0	0	3	3	3	Q8BVQ5;A0A140LI84	Q8BVQ5	Protein phosphatase methylesterase 1
Rpia	5.82171	3.63326	0	11.7493	10.0431	11.4525	16.9989	16.5647	17.1466	No	Yes	24.5127	0	21.466	12	5	1	1	1	5	5	5	P47968	P47968	Ribose-5-phosphate isomerase
Ctnnbl1	5.8033	3.89957	0	8.47024	9.28867	9.49692	14.2381	14.9742	15.4534	Yes	Yes	20.4929	0	4.8699	6	3	0	0	0	2	3	3	Q9CWL8	Q9CWL8	Beta-catenin-like protein 1
Rbm6	5.79379	3.91402	0	8.19487	8.2358	9.57446	14.6624	14.2641	14.4599	Yes	Yes	19.7439	0	9.7559	7	3	0	0	1	3	2	2	S4R1W5;Q3ULB0;A0A0A6YY54	S4R1W5;Q3ULB0;A0A0A6YY54
Camk1	5.79165	2.49389	0.000141414	8.33434	6.5534	10.1491	14.6848	14.3447	13.3823	Yes	Yes	23.3017	0	3.2625	5	2	0	0	0	2	2	1	D3Z368;Q91YS8	D3Z368;Q91YS8	Calcium/calmodulin-dependent protein kinase type 1
Cyb5r1	5.79111	2.62786	0.000176768	10.9028	13.7924	10.8397	17.37	17.3118	18.2265	No	Yes	25.8942	0	28.812	22	6	1	4	3	6	6	6	Q9DB73;G3UZG6	Q9DB73;G3UZG6	NADH-cytochrome b5 reductase 1
Fgfr1op2	5.78924	4.00201	0	9.64809	8.27824	8.61777	14.5424	14.4111	14.9583	Yes	Yes	22.804	0.0027078	1.637	1	1	0	0	0	1	1	1	Q9CRA9	Q9CRA9	FGFR1 oncogene partner 2 homolog
Fyco1	5.78241	2.76714	0.000213415	7.57103	8.01585	9.16725	13.641	NaN	14.4266	Yes	Yes	19.8315	0.0016411	1.7278	1	1	0	0	0	1	0	1	A0A140T8V9;Q8VDC1	A0A140T8V9;Q8VDC1	FYVE and coiled-coil domain-containing protein 1
Rbms3;Rbms1	5.77586	2.34839	0.000115132	9.15222	8.12602	6.62752	NaN	13.6154	13.8735	Yes	Yes	22.0419	0	2.7177	1	1	0	0	0	0	1	1	G3UZJ9;E9PZ21;A0A6I8MX12;Q91W59;Q8BWL5	G3UZJ9;E9PZ21;A0A6I8MX12;Q91W59;Q8BWL5	RNA-binding motif, single-stranded-interacting protein 1;RNA-binding motif, single-stranded-interacting protein 3
Ppp5c	5.77575	2.56031	0.000152672	NaN	10.9624	8.9854	15.6509	15.3852	16.2129	No	Yes	22.9198	0	5.8442	7	4	0	1	2	3	4	4	F7BX26;Q60676	F7BX26;Q60676	Serine/threonine-protein phosphatase;Serine/threonine-protein phosphatase 5
Ppa1	5.76903	1.98462	0.000157921	8.02781	11.6187	7.4057	13.1329	15.3986	15.8278	Yes	Yes	23.1695	0.00084104	1.9454	4	2	0	1	1	1	2	2	Q9D819	Q9D819	Inorganic pyrophosphatase
Mepce	5.76677	3.4785	0	9.9041	10.4581	8.48874	15.3756	15.6257	15.15	No	Yes	22.382	0	13.742	6	4	2	2	1	2	4	2	Q8K3A9	Q8K3A9	7SK snRNA methylphosphate capping enzyme
Ublcp1	5.76232	3.57557	0	9.03396	7.75781	9.20475	14.9168	13.7793	14.5874	Yes	Yes	22.4864	0	3.8738	2	2	0	0	0	2	2	2	Q8BGR9	Q8BGR9	Ubiquitin-like domain-containing CTD phosphatase 1
Mecr	5.75329	3.17683	0.000226629	NaN	11.8349	10.9967	16.9763	16.7865	17.7444	No	Yes	23.7292	0	29.086	13	6	0	2	1	5	5	6	Q9DCS3;A2A845	Q9DCS3;A2A845	Trans-2-enoyl-CoA reductase, mitochondrial
Scyl2	5.74544	3.47604	0	9.03342	7.46756	7.24436	13.9305	13.2461	13.8051	Yes	Yes	21.7079	0.0034984	1.5834	3	1	0	0	0	1	1	1	Q80UY7;G5E8J9;Q8CFE4	Q80UY7;G5E8J9;Q8CFE4	SCY1-like protein 2
Iglc1	5.72772	2.41949	0.000124113	NaN	9.82689	7.67361	14.0883	15.0647	14.281	No	Yes	24.3572	0	17.923	2	2	0	1	1	1	2	2	A0A0G2JE99;P01843	A0A0G2JE99;P01843	Ig lambda-1 chain C region
Sostdc1	5.72686	3.00602	0.000297872	9.07336	8.21873	7.66116	13.8111	14.2782	NaN	Yes	Yes	22.4934	0.0018991	1.6546	1	1	0	0	0	1	1	0	Q9CQN4	Q9CQN4	Sclerostin domain-containing protein 1
Chmp1a	5.72516	3.92596	0	11.6819	12.984	11.6871	17.8838	17.5629	18.0818	No	Yes	26.7402	0	6.0755	13	4	1	3	2	4	4	4	Q921W0	Q921W0	Charged multivesicular body protein 1a
Capzb	5.71801	3.34585	0.000340426	11.2733	12.3346	10.2791	16.9154	16.6272	17.4985	No	Yes	25.0266	0	9.9712	2	1	1	1	1	1	1	1	P47757;A0A0A0MQI9;F6YHZ8	P47757;A0A0A0MQI9;F6YHZ8	F-actin-capping protein subunit beta
Rfc5	5.71555	4.00501	0	11.0354	12.0366	10.612	16.857	16.8059	17.1678	No	Yes	24.5728	0	14.426	8	4	1	2	1	4	4	4	Q9D0F6;D3Z1Y6	Q9D0F6	Replication factor C subunit 5
Cyth1	5.71113	3.89252	0	8.94678	9.80183	8.37115	14.6523	14.4426	15.1583	Yes	Yes	22.3729	0	3.0177	4	3	1	0	0	2	2	3	Q3TZ02;A2A517;Q9QX11;A0A1Y7VIW9;G5E8Q4;A0A1B0GRX7;Q99KH2;O08967;P63034	Q3TZ02;A2A517;Q9QX11	Cytohesin-1
Defa22;Defa21	5.69966	1.70927	0.00033422	9.89361	6.26832	8.89739	NaN	12.9458	15.1598	Yes	Yes	24.9152	0	3.556	3	2	0	0	0	0	1	2	W4VSN6;Q8C1P2;Q8C1N8	W4VSN6;Q8C1P2;Q8C1N8	Alpha-defensin 21;Alpha-defensin 22
Ighv1-47;Ighv1-62-2	5.69669	2.56843	0.000152505	9.88999	8.00635	9.27322	13.3414	14.5502	16.368	Yes	Yes	24.745	0	3.6705	2	1	0	0	0	1	1	1	A0A075B5V8;A0A075B680	A0A075B5V8;A0A075B680
Ptpn7	5.68291	3.74343	0	9.15721	8.87428	7.66194	14.0819	13.9837	14.6766	Yes	Yes	22.0857	0.0005637	1.982	2	1	0	0	0	1	1	1	Q8BUM3	Q8BUM3	Tyrosine-protein phosphatase non-receptor type 7
Stat4	5.68004	2.59777	0.000159272	10.4622	7.94326	7.30178	14.6216	13.6034	14.5223	Yes	Yes	21.1783	0	6.6013	4	3	0	0	0	3	2	2	Q3V157;P42228	Q3V157;P42228	Signal transducer and activator of transcription;Signal transducer and activator of transcription 4
Srsf2	5.67891	3.32695	0.000325203	16.4071	17.4848	15.3531	21.6933	22.2015	22.3869	No	Yes	31.0341	0	42.53	30	5	4	4	4	4	5	5	Q62093	Q62093	Serine/arginine-rich splicing factor 2
Tmem106a	5.67565	4.26989	0	9.69257	10.1359	8.97925	15.318	14.988	15.5286	Yes	Yes	23.2113	0	6.9106	5	2	0	1	0	2	2	2	Q8VC04;A2A4M9;A2A4N0	Q8VC04;A2A4M9;A2A4N0	Transmembrane protein 106A
Vps37b	5.66627	4.71017	0	9.44393	9.34608	9.54597	15.0425	14.6623	15.6299	No	Yes	23.2771	0	6.1514	4	3	1	1	1	3	3	3	Q8R0J7	Q8R0J7	Vacuolar protein sorting-associated protein 37B
Bag6	5.65668	4.19851	0	11.5477	10.4693	10.4502	16.3514	16.3405	16.7454	No	Yes	23.2784	0	11.765	11	5	2	1	2	4	5	5	Q3UF95;Q9Z1R2;G3UYQ2;G3UZT6;G3UXT8;A0A1B0GX81;S4R183;S4R224;G3UYZ0;G3V013	Q3UF95;Q9Z1R2;G3UYQ2;G3UZT6;G3UXT8;A0A1B0GX81	Large proline-rich protein BAG6
Slc35a4	5.65649	4.20299	0	11.77	12.6677	11.4425	17.6179	17.4082	17.8236	No	Yes	28.0555	0	28.94	13	3	2	2	1	3	3	3	A0A087WQH8	A0A087WQH8
Xrcc6	5.65145	3.32453	0.0003125	11.1959	12.2989	10.1514	16.9198	16.5224	17.1584	No	Yes	23.7075	0	11.118	13	7	2	4	1	7	7	7	A0A0R4J187;P23475;A0A2R8VHZ9;E9PZD4	A0A0R4J187;P23475;A0A2R8VHZ9	X-ray repair cross-complementing protein 6
Ttc1	5.64865	3.44039	0.000372093	8.17274	8.39273	9.84538	13.9618	14.4041	14.9909	Yes	Yes	23.139	0	2.8949	2	1	0	0	0	1	1	1	A2AJK8;Q91Z38	A2AJK8;Q91Z38	Tetratricopeptide repeat protein 1
Ear2	5.64812	2.4778	0.000131579	15.6741	16.0741	13.1474	19.778	20.2959	21.766	No	Yes	30.0597	0	52.198	38	5	4	4	3	3	4	4	P97425;Q923L6	P97425	Eosinophil cationic protein 2
Pwp1	5.64177	2.75967	0.000204978	8.00143	8.95849	7.10999	15.1076	12.6556	13.232	Yes	Yes	23.9535	0.0064952	1.2684	0	1	0	0	0	1	1	1	A0A1W2P7U7;Q99LL5	A0A1W2P7U7;Q99LL5	Periodic tryptophan protein 1 homolog
Dok1	5.64162	2.273	9.97862e-05	10.0286	7.81396	NaN	13.7332	14.851	15.1045	No	Yes	21.4292	0	29.585	11	5	1	1	0	4	5	5	P97465;A0A0N4SW01	P97465	Docking protein 1
Ssu72	5.63523	3.76952	0	9.23794	8.6701	7.83174	14.0071	13.869	14.7694	Yes	Yes	22.8574	0	10.716	6	3	0	0	0	3	3	3	Q9CY97	Q9CY97	RNA polymerase II subunit A C-terminal domain phosphatase SSU72
Sgta	5.63321	3.20647	0.000215054	11.1894	12.1741	NaN	16.986	17.2097	17.7491	No	Yes	25.7467	0	26.905	16	6	2	2	0	5	6	6	Q8BJU0;A0A1W2P6P1;A0A1W2P7I5	Q8BJU0;A0A1W2P6P1;A0A1W2P7I5	Small glutamine-rich tetratricopeptide repeat-containing protein alpha
C5ar1	5.6261	4.0499	0	10.6905	10.914	10.7965	17.2016	15.7858	16.2919	No	Yes	25.0962	0	7.063	5	3	1	1	1	3	3	3	P30993	P30993	C5a anaphylatoxin chemotactic receptor 1
Met	5.62321	1.54912	0.000452162	7.85663	7.0828	13.7404	15.4245	14.713	15.412	Yes	Yes	21.2655	0.0042553	1.4716	4	1	0	0	1	1	1	1	F8VQL0;P16056	F8VQL0;P16056	Receptor protein-tyrosine kinase;Hepatocyte growth factor receptor
Ptgr1	5.62297	6.08736	0	10.8897	10.9948	10.8223	16.7448	16.3388	16.4921	No	Yes	24.5075	0	3.644	7	3	1	1	1	2	3	3	Q91YR9;REV__A0A0R4J177;REV__Q3TVC7	Q91YR9	Prostaglandin reductase 1
Abcc1	5.60128	1.45948	0.000658426	11.5499	6.38665	8.35754	13.6187	NaN	15.1132	Yes	Yes	19.7543	0.0013732	1.7729	1	1	1	0	0	1	0	1	O35379	O35379	Multidrug resistance-associated protein 1
Ppil4	5.60044	3.13556	0.000336538	10.3939	11.6051	NaN	16.5048	16.3944	16.9006	No	Yes	23.1754	0	7.3588	8	3	1	1	0	3	3	3	Q9CXG3	Q9CXG3	Peptidyl-prolyl cis-trans isomerase-like 4
Mina	5.59977	2.23628	9.20447e-05	9.07868	10.6721	6.90287	15.2679	14.986	13.199	Yes	Yes	22.6203	0	5.7847	5	3	0	2	0	3	3	2	D3YTU3;Q8CD15	D3YTU3;Q8CD15	Bifunctional lysine-specific demethylase and histidyl-hydroxylase MINA
Ndufb6	5.58512	2.39065	0.00011466	9.32596	11.6206	NaN	16.1377	15.7018	16.3357	No	Yes	24.6921	0	16.43	11	2	1	1	0	2	2	2	A2AP32;Q3UIU2	A2AP32;Q3UIU2	NADH dehydrogenase [ubiquinone] 1 beta subcomplex subunit 6
Sp140;C130026I21Rik;A530032D15Rik	5.58455	4.04478	0	10.097	9.94274	10.1915	14.8787	15.8361	16.2701	No	Yes	22.9913	0	5.4295	7	4	2	1	2	2	4	3	Q6NSQ5;E0CY74;E9Q3M7;E0CXL1;E9PV05;E9Q422;E0CXN9;Q3KNJ6;Q8C898	Q6NSQ5;E0CY74;E9Q3M7;E0CXL1;E9PV05;E9Q422;E0CXN9;Q3KNJ6;Q8C898
Rrp12	5.58405	2.82767	0.00022508	10.1943	7.57223	9.9557	14.8406	14.4345	15.1993	No	Yes	20.1526	0	9.7712	7	4	1	1	1	3	4	4	Q6P5B0	Q6P5B0	RRP12-like protein
Fam3c	5.57619	3.16837	0.000345679	11.4334	NaN	10.4342	16.51	16.1069	16.9131	No	Yes	25.0057	0.00056883	2.0465	3	2	1	0	1	2	2	2	G3X9I1;G5E911;Q91VU0;E9Q8C5;E9Q6F0	G3X9I1;G5E911;Q91VU0;E9Q8C5;E9Q6F0	Protein FAM3C
Smek1;Smek2	5.57395	2.6673	0.000171149	6.79079	9.82594	9.194	14.3792	13.6976	14.4559	Yes	Yes	20.7974	0.00028877	2.1679	1	2	0	1	0	2	2	2	E9Q481;Q6P2K6;Q5RJB9;Q922R5	E9Q481;Q6P2K6;Q5RJB9;Q922R5	Serine/threonine-protein phosphatase 4 regulatory subunit 3A;Serine/threonine-protein phosphatase 4 regulatory subunit 3B
Fcgr4	5.56867	2.31797	0.000103397	11.0239	9.2591	7.00872	14.1229	14.7963	15.0785	Yes	Yes	23.1259	0	3.1362	3	1	0	0	0	1	1	1	A0A0B4J1G0	A0A0B4J1G0
Bcl2l13	5.55768	4.74747	0	12.3501	12.3604	11.6883	17.5241	17.531	18.0168	No	Yes	25.3945	0	24.597	13	4	2	2	2	4	4	3	P59017	P59017	Bcl-2-like protein 13
Nolc1	5.55446	3.63795	0	12.6525	14.089	12.4662	18.8664	18.5493	18.4553	No	Yes	25.6532	0	26.182	23	9	3	5	4	9	9	8	A0A286YDA2;A0A286YDT3;E9Q5C9;A0A286YDV7;A0A286YCD1;A0A286YDZ1	A0A286YDA2;A0A286YDT3;E9Q5C9;A0A286YDV7
P2rx4	5.55147	3.04035	0.000316742	13.9476	14.6693	12.2161	18.8677	19.074	19.5457	No	Yes	25.965	0	70.385	31	9	5	5	2	8	9	8	D3Z5U5;Q9Z257;D3YYR5;Q9Z256;Q9JJX6;A0A0G2JEP2	D3Z5U5;Q9Z257;D3YYR5;Q9Z256;Q9JJX6	P2X purinoceptor;P2X purinoceptor 4
Ppip5k2	5.54827	5.2622	0	7.68489	8.22631	8.17676	13.6937	13.3597	13.6793	Yes	Yes	19.6547	0.0011108	1.8528	1	1	0	0	0	1	1	1	E9Q9J4;Q6ZQB6	E9Q9J4;Q6ZQB6	Inositol hexakisphosphate and diphosphoinositol-pentakisphosphate kinase 2
Igkv4-61;Igkv4-58;Igkv4-91	5.54465	4.97249	0.000337469	10.8701	NaN	10.8233	16.4017	16.381	NaN	No	Yes	26.3658	0.0057336	1.2977	2	1	1	0	1	1	1	0	A0A075B5M2;A0A075B5M3;A0A0G2JH00;A0A0G2JGI6;A0A075B5L2;P01680	A0A075B5M2;A0A075B5M3;A0A0G2JH00;A0A0G2JGI6;A0A075B5L2;P01680	Ig kappa chain V-IV region S107B
Ate1	5.53173	2.91268	0.000252252	10.6077	8.58078	10.0942	14.5323	15.0078	16.3378	Yes	Yes	21.6171	0	5.5909	6	3	1	0	0	2	3	3	Q4FCQ7;J3QNU1;A0A1L1SQ41;Q9Z2A5;A0A140LJ98	Q4FCQ7;J3QNU1;A0A1L1SQ41;Q9Z2A5	Arginyl-tRNA--protein transferase 1
Gpkow	5.53005	2.70094	0.000170732	7.61562	8.57201	9.25944	NaN	14.4182	13.6066	Yes	Yes	21.9361	0.0011164	1.9012	3	2	0	0	1	0	2	1	F6XU64;Q56A08	F6XU64;Q56A08	G patch domain and KOW motifs-containing protein
Uhrf1	5.52608	3.89824	0	10.1864	10.4765	11.4994	15.876	16.2622	16.6024	No	Yes	22.018	0	18.593	9	7	1	1	3	6	5	6	Q8VDF2;Q7TMI3	Q8VDF2	E3 ubiquitin-protein ligase UHRF1
Mmtag2	5.52266	2.19997	8.63132e-05	8.70215	11.502	7.18806	14.9312	14.2069	14.822	Yes	Yes	22.7293	0	2.5058	3	1	0	1	0	1	1	1	Q99LX5	Q99LX5	Multiple myeloma tumor-associated protein 2 homolog
Snrpc	5.52006	2.51581	0.000133206	11.1084	8.81355	8.6422	13.6981	15.802	15.6243	Yes	Yes	22.1726	0	10.639	3	2	0	0	0	1	2	1	Q62241;A0A3B2W450;A0A3B2WCR6	Q62241;A0A3B2W450;A0A3B2WCR6	U1 small nuclear ribonucleoprotein C
Commd5	5.51834	1.76065	0.000339506	7.4656	11.3588	5.9795	12.427	14.0951	14.8369	Yes	Yes	22.1764	0	8.464	5	2	0	2	0	1	2	2	A0A0R4J0U7;Q8R395	A0A0R4J0U7;Q8R395	COMM domain-containing protein 5
Mrpl10	5.50697	3.64465	0	7.83059	9.53013	8.52157	14.3539	13.8063	14.243	Yes	Yes	22.1928	0	13.745	5	3	0	1	0	3	3	3	Q3TBW2	Q3TBW2	39S ribosomal protein L10, mitochondrial
Spon1	5.50569	2.16895	8.3632e-05	8.36561	10.0592	7.42134	14.5722	13.67	NaN	Yes	Yes	21.6355	0.0089928	1.2032	2	1	1	0	0	1	1	0	Q3UYD7;Q8VCC9	Q3UYD7;Q8VCC9	Spondin-1
Psmd9	5.50274	2.71254	0.000177215	10.4836	13.5924	11.676	17.5716	17.1338	17.5549	No	Yes	25.9107	0	32.485	15	6	1	6	3	6	6	6	Q9CR00;A0A0G2JGN6	Q9CR00;A0A0G2JGN6	26S proteasome non-ATPase regulatory subunit 9
U2surp	5.50256	3.33349	0.000278746	10.8892	12.0755	9.92278	16.3635	16.426	16.6056	No	Yes	22.5977	0	9.7073	11	7	1	3	1	7	6	6	Q6NV83;A0A087WRG2	Q6NV83	U2 snRNP-associated SURP motif-containing protein
Trpm3	5.50198	2.16197	8.21596e-05	11.9976	11.5636	11.5148	14.6017	18.2553	18.7249	No	Yes	20.9841	0.0011117	1.8576	5	2	1	1	1	2	2	2	F7CJ77;J9S2Z5;J9T153;J9T120;J9SVL3;Q5F4S6;Q5F4S7;Q5F4S8;Q5F4T0;Q5F4S9;J9S314;J9SUB2;Q8BIH6;E9PUC8;B2RUS0	F7CJ77;J9S2Z5;J9T153;J9T120;J9SVL3;Q5F4S6;Q5F4S7;Q5F4S8;Q5F4T0;Q5F4S9;J9S314;J9SUB2;Q8BIH6;E9PUC8;B2RUS0
Pla2g7	5.49831	2.2938	9.7561e-05	6.58524	9.42857	10.427	13.6884	14.3897	14.8577	Yes	Yes	22.242	0	2.9394	4	2	0	0	0	2	2	2	Q60963;E9Q330	Q60963;E9Q330	Platelet-activating factor acetylhydrolase
Trappc5	5.49004	2.68462	0.000168472	10.4848	8.24151	7.47367	14.209	13.8419	14.6193	Yes	Yes	22.8336	0.0024397	1.6455	3	1	0	0	0	1	1	1	Q9CQA1	Q9CQA1	Trafficking protein particle complex subunit 5
C030006K11Rik	5.48912	2.75675	0.000190476	8.69922	11.2994	9.25599	15.5417	14.4334	15.7469	Yes	Yes	24.0215	0	5.797	4	1	0	1	0	1	1	1	Q9D1W4;Q8VE95	Q9D1W4;Q8VE95	UPF0598 protein C8orf82 homolog
Ehd2	5.48746	2.13761	0.000120523	9.0963	6.02426	10.2964	13.4453	13.7081	14.726	Yes	Yes	19.6657	0	4.6724	4	2	0	1	1	2	2	2	Q8BH64	Q8BH64	EH domain-containing protein 2
Bcap31	5.4753	3.06642	0.000313901	14.5104	15.6529	13.2832	19.8258	19.5828	20.464	No	Yes	27.6348	0	115.43	34	8	4	8	3	7	7	8	Q61335	Q61335	B-cell receptor-associated protein 31
2010005H15Rik;Gm5483	5.46936	3.08537	0.000321839	9.71631	8.29509	8.1358	15.2143	13.5302	13.8108	Yes	Yes	24.0077	0	2.3545	3	4	0	0	0	3	2	2	Q9D8D6;B2RV77	Q9D8D6;B2RV77
Stx18	5.4678	4.19209	0	9.36615	8.72605	8.29968	14.0935	14.0172	14.6846	Yes	Yes	21.8727	0	4.5129	3	2	0	0	0	2	2	2	A0A0J9YTY5;D3YY98;Q8VDS8;A0A0J9YUA5	A0A0J9YTY5;D3YY98;Q8VDS8;A0A0J9YUA5	Syntaxin-18
Myo5a	5.45971	3.59964	0.000314961	9.97443	NaN	9.81228	15.2163	14.9955	15.8474	No	Yes	20.8983	0	5.6433	5	3	1	0	1	2	3	3	D3YZ62;D3Z4J3;Q99104;F6Z2S4;B8JK05;F6TDE5	D3YZ62;D3Z4J3;Q99104	Unconventional myosin-Va
Mpc1	5.45364	2.97267	0.000243478	NaN	10.2591	11.1532	16.2474	15.5415	16.6904	No	Yes	25.9331	0.0032328	1.5944	5	1	0	1	1	1	1	1	D3YWY6;D3Z5S0;E9Q0V4;P63030	D3YWY6;D3Z5S0;E9Q0V4;P63030	Mitochondrial pyruvate carrier 1
Itgb7	5.45159	3.59816	0	10.6185	9.61868	9.1842	14.7972	15.1119	15.8671	No	Yes	21.1667	0	6.8616	7	3	1	1	1	2	3	3	P26011	P26011	Integrin beta-7
Sh3bgrl3	5.44597	3.41624	0.000306513	16.9781	17.7508	15.8023	22.3033	21.9959	22.5699	No	Yes	31.8975	0	101.57	27	5	3	3	3	5	5	5	Q91VW3;I7HPY0	Q91VW3	SH3 domain-binding glutamic acid-rich-like protein 3
Tceb3	5.44089	3.59053	0	11.1863	10.4132	12.2137	16.824	16.5064	16.8056	No	Yes	22.2448	0	6.1235	8	3	1	1	2	3	3	3	Q8CB77	Q8CB77	Transcription elongation factor B polypeptide 3
Map7d1	5.44052	2.86532	0.000220472	9.94961	11.4627	8.70873	15.8355	15.1022	15.5048	No	Yes	22.5306	0	11.17	7	4	1	3	1	4	3	4	A2AJI1;A8Y5P4;A2AJI0;F6WF36	A2AJI1;A8Y5P4;A2AJI0;F6WF36	MAP7 domain-containing protein 1
Arhgef6	5.4403	2.68613	0.000164706	12.5478	13.6842	10.5804	17.6889	17.4368	18.0076	No	Yes	23.0879	0	22.129	27	10	4	6	2	9	10	9	F6WMJ3;Q8K4I3;A2AFJ8;H3BJ53;H3BKQ0	F6WMJ3;Q8K4I3;A2AFJ8	Rho guanine nucleotide exchange factor 6
Chmp1b1;Chmp1b2	5.43828	1.72247	0.000407586	13.6509	12.3693	8.39583	17.76	15.2748	17.6961	No	Yes	26.2132	0	3.2936	12	3	2	2	2	3	2	3	Q99LU0;Q9CQD4	Q99LU0;Q9CQD4	Charged multivesicular body protein 1b-1;Charged multivesicular body protein 1b-2
Hmga1	5.4328	3.76538	0	13.9393	13.0494	12.445	18.3005	18.9698	18.4619	No	Yes	22.8277	0	8.0399	12	2	1	1	1	1	2	1	A0A338P6G6;A0A384DV79;A0A338P6D0	A0A338P6G6;A0A384DV79
Pram1	5.43127	3.62967	0	10.3451	10.4638	10.4737	16.8898	15.2803	15.4063	No	Yes	21.6651	0	9.5683	6	5	1	1	1	5	2	2	Q6BCL1	Q6BCL1	PML-RARA-regulated adapter molecule 1
Capn2	5.4306	2.29426	9.51734e-05	12.7818	12.9668	9.3865	17.3032	16.7032	17.4205	No	Yes	23.9368	0	12.681	17	8	4	5	1	7	7	7	O08529	O08529	Calpain-2 catalytic subunit
Ccdc115	5.4293	3.43783	0.000313725	9.4694	10.4588	8.7709	14.74	14.6295	15.6175	Yes	Yes	23.526	0	6.8281	5	2	0	0	0	2	2	2	Q8VE99	Q8VE99	Coiled-coil domain-containing protein 115
Kifc1;Kifc5b	5.41767	2.34487	0.000102115	7.9528	7.1486	9.55768	12.0838	15.1921	13.6362	Yes	Yes	22.4512	0.00029019	2.195	1	2	0	0	1	1	2	1	G3UXN2;E9PUA5;Q9QWT9	G3UXN2;E9PUA5;Q9QWT9	Kinesin-like protein;Kinesin-like protein KIFC1
Ubxn6	5.4119	4.33989	0	8.08183	8.70728	8.93988	14.0775	13.5633	14.3239	Yes	Yes	22.7739	0	4.0961	4	2	0	0	0	2	2	2	B8JJA4;Q99PL6	B8JJA4;Q99PL6	UBX domain-containing protein 6
Fam175b	5.40794	2.96925	0.000257353	11.3128	12.1578	9.62978	16.4737	16.0881	16.7623	No	Yes	24.718	0	19.002	5	4	3	3	2	3	3	3	Q3TCJ1;Z4YJY0;D3Z4D8	Q3TCJ1;Z4YJY0;D3Z4D8	BRISC complex subunit Abro1
Stx5a;Stx5	5.40626	3.7104	0	10.5568	9.73709	11.228	15.4406	16.1225	16.1775	No	Yes	24.2416	0	5.7777	7	4	1	1	3	3	3	3	H3BJ02;H3BJE3;I1E4X1;Q8K1E0;H3BKJ7;H3BKP0	H3BJ02;H3BJE3;I1E4X1;Q8K1E0;H3BKJ7	Syntaxin-5
Dcun1d1	5.40459	4.18218	0	9.97598	9.4049	9.74681	14.7052	14.8611	15.7752	No	Yes	23.5711	0.00056867	2.0423	2	1	1	1	1	1	1	1	A0A140T8R8;A0A0G2JGV7;Q3UT23;A0A1Y7VP24;Q9QZ73	A0A140T8R8;A0A0G2JGV7;Q3UT23;A0A1Y7VP24;Q9QZ73	DCN1-like protein;DCN1-like protein 1
Dnajc19	5.40459	2.10336	0.000168354	8.75535	12.3927	8.10139	15.0567	14.9815	15.425	Yes	Yes	23.5362	0	8.9949	4	2	0	1	0	2	2	2	D3Z5K6;Q9CQV7;G3X8S1	D3Z5K6;Q9CQV7;G3X8S1	Mitochondrial import inner membrane translocase subunit TIM14
Fpr2	5.40307	3.62265	0	8.22474	9.87936	8.70145	14.5779	14.0284	14.4085	Yes	Yes	22.6972	0	2.4542	3	1	0	1	0	1	1	1	O88536	O88536	Formyl peptide receptor 2
Vps28	5.4026	3.62091	0.000305344	10.3769	10.8775	NaN	16.3394	15.6365	16.1135	No	Yes	24.2047	0	31.474	10	5	2	2	0	5	5	4	Q9D1C8;A0A2R8VKS6	Q9D1C8;A0A2R8VKS6	Vacuolar protein sorting-associated protein 28 homolog
Smap1	5.39343	2.34545	0.000101818	10.9692	8.71694	9.75283	NaN	14.8113	15.6016	Yes	Yes	23.6603	0	4.7176	2	1	0	0	0	0	1	1	Q91VZ6	Q91VZ6	Stromal membrane-associated protein 1
Fam104a	5.39001	3.67248	0.000329218	NaN	10.0989	9.93682	14.9471	15.5375	15.739	No	Yes	24.6712	0	54.5	5	2	0	1	1	2	2	2	A2A6P4	A2A6P4
Mcemp1	5.38907	3.05973	0.000263653	NaN	11.5716	10.3736	16.7093	16.1055	16.2701	No	Yes	24.2938	0	2.7876	7	3	0	2	1	3	3	3	Q9D8U6	Q9D8U6	Mast cell-expressed membrane protein 1
Prmt1	5.38887	1.74836	0.000333839	10.6419	7.48435	7.05384	14.1035	NaN	13.461	Yes	Yes	21.0635	0	24.232	2	1	0	0	0	1	0	1	A0A140LJ70;A0A140LHS4	A0A140LJ70;A0A140LHS4
Thyn1	5.38561	3.74138	0	10.2503	8.6922	9.36376	14.7044	14.6079	15.1507	Yes	Yes	21.7586	0	3.717	4	1	1	0	0	1	1	1	Q8BJZ7;Q91YJ3	Q8BJZ7;Q91YJ3	Thymocyte nuclear protein 1
Dynll2	5.38449	3.23773	0.000222222	7.67109	9.4191	9.49028	14.3433	13.7513	14.6394	Yes	Yes	23.9959	0	19.853	3	1	0	1	0	1	1	1	Q9D0M5;D6RIN4	Q9D0M5;D6RIN4	Dynein light chain 2, cytoplasmic
Cdk2ap1;Cdk2ap2	5.36494	3.30885	0.000204082	8.79767	9.55333	8.48494	14.3789	14.2416	NaN	Yes	Yes	23.5195	0.0047406	1.3936	2	1	0	0	0	1	1	0	F2Z4B3;O35207;Q9CPY4	F2Z4B3;O35207;Q9CPY4	Cyclin-dependent kinase 2-associated protein 1;Cyclin-dependent kinase 2-associated protein 2
Rnasel	5.36474	3.40696	0.00028169	9.84506	10.0281	8.32515	14.6574	14.4392	15.1959	Yes	Yes	21.4946	0.0044962	1.4296	3	2	1	0	0	2	2	2	S4R1J5;S4R2R4;Q05921	S4R1J5;S4R2R4;Q05921	2-5A-dependent ribonuclease
Hnrnph2	5.36359	2.85571	0.00020558	11.0736	13.1809	10.5392	17.197	16.7377	16.9497	No	Yes	24.2174	0	26.362	11	2	1	2	1	2	2	2	P70333	P70333	Heterogeneous nuclear ribonucleoprotein H2
Rbm15	5.35983	3.9609	0	11.6761	10.3774	11.0883	16.1555	16.2862	16.7795	No	Yes	21.2756	0	13.649	5	3	2	1	2	3	3	3	Q0VBL3;Q6PHZ5	Q0VBL3
Cuta	5.35967	2.77172	0.000180412	10.7039	8.09816	10.5681	15.09	14.9208	15.4383	Yes	Yes	25.2188	0	4.7169	1	1	0	0	0	1	1	1	D5MCW4;Q9CQ89	D5MCW4;Q9CQ89	Protein CutA
Tapbpl	5.357	3.1939	0.000200501	7.77973	9.68805	8.2001	14.2524	13.264	14.2225	Yes	Yes	21.5809	0.0064986	1.2745	1	1	0	0	0	1	1	1	Q8VD31	Q8VD31	Tapasin-related protein
Arsa	5.35599	2.14694	0.000118238	11.1817	13.979	9.66929	16.4552	17.0797	17.3629	No	Yes	23.8415	0	68.097	16	5	2	4	1	3	5	4	P50428;F6QGM0	P50428	Arylsulfatase A
Apoo	5.35489	2.66184	0.000151025	11.3022	8.84578	8.47335	14.8702	14.4811	15.3347	Yes	Yes	23.7996	0	15.532	3	1	0	0	0	1	1	1	Q9DCZ4	Q9DCZ4	Apolipoprotein O
Cst3	5.35057	3.17845	0.000341463	11.9284	13.2007	10.9634	17.266	17.1673	17.7109	No	Yes	25.3385	0	10.179	9	3	1	1	1	3	3	3	P21460;A2APX3	P21460;A2APX3	Cystatin-C
Prpf38a	5.35004	4.1192	0	8.59168	9.28462	8.90534	14.1621	13.7788	14.8909	Yes	Yes	22.5722	0	2.6022	2	1	0	0	0	1	1	1	Q4FK66	Q4FK66	Pre-mRNA-splicing factor 38A
Isg20	5.34874	4.13583	0	10.7126	10.6579	10.6247	15.2775	16.233	16.5311	No	Yes	23.9746	0	14.557	10	4	1	1	1	3	4	3	A0A0U1RP59;Q9JL16	A0A0U1RP59;Q9JL16	Interferon-stimulated gene 20 kDa protein
Tprkb	5.34562	3.40807	0.000231884	8.23085	8.65555	NaN	13.3931	13.6733	14.3	No	Yes	22.9265	0	3.4391	5	2	1	1	0	2	2	2	Q8QZZ7;D3YXX8;A0A0J9YVB8;D3Z5E8;G3X9K8	Q8QZZ7;D3YXX8;A0A0J9YVB8;D3Z5E8;G3X9K8	EKC/KEOPS complex subunit Tprkb
Pglyrp1	5.34161	3.0707	0.000284553	13.5088	14.0693	12.0931	19.3721	18.1834	18.1405	No	Yes	27.3995	0	51.165	15	4	3	3	2	4	4	4	O88593	O88593	Peptidoglycan recognition protein 1
Eri1	5.33954	2.62502	0.000139442	9.02559	7.354	8.46926	13.2152	14.0298	NaN	Yes	Yes	21.5091	0	2.838	2	2	0	0	0	1	2	1	A0A0R4J0C8;Q7TMF2	A0A0R4J0C8;Q7TMF2	3-5 exoribonuclease 1
Cd14	5.33798	3.11162	0.000307018	10.3496	12.5427	11.2901	16.6133	16.3134	17.2696	No	Yes	23.6944	0	28.958	9	7	1	3	2	5	6	7	P10810	P10810	Monocyte differentiation antigen CD14
Rtf1	5.3373	3.43672	0.00029304	12.017	10.4539	10.3662	15.9596	16.641	16.2484	No	Yes	22.5231	0	17.06	14	6	3	1	2	5	6	5	A2AQ19	A2AQ19	RNA polymerase-associated protein RTF1 homolog
Ctsl	5.33529	2.72393	0.000165877	12.7361	14.3919	11.4718	17.7836	18.1641	18.6579	No	Yes	25.5648	0	152.62	24	5	1	5	1	5	5	5	P06797;A0A1Y7VP49;A0A1Y7VNM3	P06797;A0A1Y7VP49	Cathepsin L1;Cathepsin L1 heavy chain;Cathepsin L1 light chain
Ccdc112	5.33446	2.04587	0.000157058	NaN	7.69189	10.6084	14.6231	14.0196	14.8112	No	Yes	21.9192	0.0032345	1.5987	3	2	0	1	1	1	1	1	D3Z1J2;A0AUP1	D3Z1J2;A0AUP1	Coiled-coil domain-containing protein 112
Srpk1	5.33385	3.44	0.000295203	7.84359	7.851	9.07759	12.8503	13.7202	14.2032	Yes	Yes	20.8944	0.0054988	1.3293	1	1	0	0	0	1	1	1	O70551	O70551	SRSF protein kinase 1
Srsf4	5.32743	4.55951	0	13.2841	13.4707	12.9984	18.1178	18.5968	19.0209	No	Yes	26.928	0	9.9185	11	4	2	2	2	3	4	4	Q8VE97;Q542V3;A0A0A6YWA5	Q8VE97;Q542V3	Serine/arginine-rich splicing factor 4
Serpina3n	5.32081	3.95997	0	10.1477	9.68675	10.1669	14.571	15.5293	15.8635	No	Yes	21.931	0	31.467	5	3	1	1	1	2	2	3	G3X8T9;Q91WP6	G3X8T9;Q91WP6	Serine protease inhibitor A3N
Atxn3	5.31104	3.4069	0.000273973	7.70302	9.01174	7.40057	13.7368	12.7566	13.5551	Yes	Yes	21.8182	0	3.7172	2	1	0	0	0	1	1	1	F6T5L3;E9Q717;Q5M8S1;Q9CVD2	F6T5L3;E9Q717;Q5M8S1;Q9CVD2	Ataxin-3
Dctn6	5.30261	5.36358	0	9.19723	8.98816	9.36975	14.674	14.1965	14.5924	Yes	Yes	24.5373	0.0027056	1.6354	3	2	0	0	0	1	2	2	F6XWI6;D3Z6H3;Q9WUB4;D3Z4E5	F6XWI6;D3Z6H3;Q9WUB4;D3Z4E5	Dynactin subunit 6
Igsf6	5.30222	2.65609	0.000147059	8.89777	10.6346	7.63486	14.2152	13.9498	14.9088	Yes	Yes	23.2832	0	2.3062	1	1	0	0	0	1	1	1	P0C6B7	P0C6B7	Immunoglobulin superfamily member 6
Aprt	5.29774	3.3055	0.000232558	10.7199	10.6875	12.5162	16.8196	16.4975	16.4997	No	Yes	23.6384	0	13.017	10	4	1	1	2	4	3	2	P08030;A0A1D5RLR6	P08030;A0A1D5RLR6	Adenine phosphoribosyltransferase
Bcl10	5.29434	2.73944	0.000166271	11.2613	8.46446	8.96601	14.9556	14.6491	14.97	Yes	Yes	23.329	0	4.0453	3	3	0	0	0	3	2	2	Q9Z0H7	Q9Z0H7	B-cell lymphoma/leukemia 10
Fmnl2	5.29261	3.028	0.000261194	10.7222	10.7831	8.72332	15.2338	14.9995	15.8732	No	Yes	21.3353	0	7.035	10	3	2	2	1	3	3	3	E9PXE6;F8VPR2;A2AQW2;A2APV2;D3Z7A7;Q6ZPF4	E9PXE6;F8VPR2;A2AQW2;A2APV2	Formin-like protein 2
S100a9	5.2894	4.28049	0	20.5098	20.7935	19.8597	25.9953	25.2929	25.7429	No	Yes	34.6225	0	65.148	359	10	6	6	6	9	9	8	P31725	P31725	Protein S100-A9
Nudt16	5.28926	4.39184	0	10.4754	10.841	9.99831	15.4706	15.5655	16.1464	No	Yes	25.1266	0	18.509	14	3	2	2	1	3	3	3	A0A087WSB5;A0A087WRE5;Q6P3D0;A0A2R8VH99;E9Q9G1;Q8VHN8	A0A087WSB5;A0A087WRE5;Q6P3D0	U8 snoRNA-decapping enzyme
Fam96a	5.28578	3.95687	0	9.82006	8.61008	8.71236	14.1491	14.2172	14.6336	Yes	Yes	23.4194	0	2.6611	3	2	0	0	0	2	2	2	Q9DCL2	Q9DCL2	MIP18 family protein FAM96A
Lsm6	5.28426	3.2674	0.000212766	12.2578	14.2954	12.7882	18.3417	18.1878	18.6646	No	Yes	28.1679	0	8.4973	17	5	2	4	2	5	5	5	P62313	P62313	U6 snRNA-associated Sm-like protein LSm6
Ubxn4	5.28228	2.63287	0.00014014	11.9464	9.25218	9.24665	15.6168	14.9935	15.6818	Yes	Yes	22.806	0	25.386	5	2	1	0	0	2	2	2	A0A0R4J078;A0A087WSK5;Q8VCH8	A0A0R4J078;A0A087WSK5;Q8VCH8	UBX domain-containing protein 4
Dmap1	5.27884	3.80458	0.000336134	NaN	10.5363	10.3433	16.0217	15.3234	15.8108	No	Yes	22.7176	0	4.5838	3	2	0	1	1	2	2	2	Q9JI44	Q9JI44	DNA methyltransferase 1-associated protein 1
Dnajb6	5.27655	2.70855	0.000155211	9.04899	11.8341	9.5874	15.3342	15.1086	15.8574	No	Yes	24.0893	0	5.8463	3	3	1	2	1	3	3	3	A0A0G2JER9;O54946;G3X8S5;A0A0G2JGN9;A0A0G2JEI3;A0A087WP03;F6YRQ2;Q9QYI8;Q9QYI5	A0A0G2JER9;O54946;G3X8S5	DnaJ homolog subfamily B member 6
Frmpd3	5.27109	4.31115	0	10.8984	10.5089	10.6778	15.3379	16.1981	16.3624	No	Yes	21.6471	0.0034741	1.5186	3	1	1	1	1	1	1	1	A0A140LIW3	A0A140LIW3
Ighv5-15;Ighv5-12	5.27086	1.93741	0.000212374	7.94602	7.02537	10.1286	NaN	14.0386	13.2365	Yes	Yes	22.8345	0	4.873	1	1	0	0	1	0	1	1	A0A075B5Q9;A0A0A6YWC7;A0A075B5Q4;P18525	A0A075B5Q9;A0A0A6YWC7;A0A075B5Q4;P18525	Ig heavy chain V region 5-84
Ccdc51	5.27007	3.79028	0	11.2324	10.4058	10.2682	15.3268	15.8715	16.5183	No	Yes	19.8009	0	11.258	6	2	1	1	1	2	2	2	Q3URS9	Q3URS9	Coiled-coil domain-containing protein 51
Gca	5.26717	4.8004	0	9.46218	8.92765	8.76462	14.5967	14.219	14.1403	Yes	Yes	23.222	0	2.4974	5	2	1	0	0	2	2	2	Q8VC88	Q8VC88	Grancalcin
Diablo	5.26601	3.46077	0.00027972	8.82585	9.51124	9.39327	15.0193	13.4816	15.0275	Yes	Yes	23.8169	0	5.126	3	1	0	0	0	1	1	1	A0A0G2JGS0;Q8R1D8;D3Z3K5;D3Z2Q3;Q9JIQ3	A0A0G2JGS0;Q8R1D8;D3Z3K5;D3Z2Q3;Q9JIQ3	Diablo homolog, mitochondrial
Hook3	5.25976	2.70258	0.000153005	11.4998	12.1633	10.9373	18.0903	16.9779	15.3115	No	Yes	23.0341	0	20.172	8	7	2	3	1	6	6	4	Q8BUK6;F6W1A2	Q8BUK6	Protein Hook homolog 3
Akr1c13;Akr1c12	5.25874	4.4458	0	11.4179	11.7841	11.2588	16.5148	16.4398	17.2824	No	Yes	24.2899	0	44.795	15	6	2	3	2	6	6	6	Q8VC28;Q9JLI0	Q8VC28;Q9JLI0	Aldo-keto reductase family 1 member C13
Nvl	5.25601	2.72976	0.000159635	8.47584	10.0978	7.1005	13.8004	13.8222	13.8195	Yes	Yes	20.3075	0.0069966	1.258	0	1	0	0	0	1	1	1	Q9DBY8	Q9DBY8	Nuclear valosin-containing protein-like
Hpse	5.25569	2.42734	0.000107941	12.5065	10.3839	NaN	16.4292	16.9027	16.7707	No	Yes	24.0275	0	9.6877	12	6	2	2	0	5	6	4	Q6YGZ1;D3Z3C3	Q6YGZ1;D3Z3C3	Heparanase;Heparanase 8 kDa subunit;Heparanase 50 kDa subunit
Rragb;Rraga	5.25507	3.07388	0.00026975	9.59561	10.8589	8.57126	14.8407	14.5853	15.365	No	Yes	22.9452	0.00028482	2.0508	3	2	1	1	1	2	2	2	Q6NTA4;Q80X95;G3UYP1	Q6NTA4;Q80X95;G3UYP1	Ras-related GTP-binding protein B;Ras-related GTP-binding protein A
Pdzd8	5.25237	4.74009	0	8.92066	9.46095	9.01455	14.4825	13.9964	14.6745	No	Yes	20.68	0	3.1715	4	2	1	1	1	2	2	2	B9EJ80	B9EJ80
Thoc5	5.24682	3.90775	0	10.0548	9.68198	8.66717	14.8577	14.5395	14.7472	Yes	Yes	21.2761	0	12.037	6	2	0	0	0	2	2	2	A0A0R4J0J6;Q8BKT7;Q5SVF8;Q5SVF9	A0A0R4J0J6;Q8BKT7;Q5SVF8;Q5SVF9	THO complex subunit 5 homolog
Mzb1	5.24617	4.32736	0	15.6508	15.9819	15.5387	21.3619	20.3702	21.1779	No	Yes	29.5704	0	133.75	30	6	4	4	3	6	6	6	Q9D8I1;A0A494B9S2	Q9D8I1;A0A494B9S2	Marginal zone B- and B1-cell-specific protein
Fkbp11	5.24249	3.9188	0	11.6805	11.5782	11.6623	16.984	16.1088	17.5556	No	Yes	25.235	0	21.628	16	5	2	2	2	4	4	5	Q9D1M7	Q9D1M7	Peptidyl-prolyl cis-trans isomerase FKBP11
Sfxn2	5.23982	3.35778	0.000236686	8.99532	7.31255	8.478	12.9994	13.428	14.0779	Yes	Yes	22.1925	0	4.4918	3	1	0	0	0	1	1	1	A0A494B9V3;Q925N2	A0A494B9V3;Q925N2	Sideroflexin-2
Dctn4	5.23963	2.57892	0.000128913	8.89383	10.803	7.88625	15.2128	13.8045	14.2846	Yes	Yes	19.8228	0	16.008	3	2	0	1	0	2	1	1	Q8CBY8	Q8CBY8	Dynactin subunit 4
Rgs19	5.23909	2.97601	0.000232945	8.33499	9.68489	7.30907	14.2329	13.4326	13.3808	Yes	Yes	24.1844	0	3.2935	3	1	0	1	0	1	1	1	F6WK59;B7ZCT0;Q8BFU4;B7ZCT1;Q9CX84	F6WK59;B7ZCT0;Q8BFU4;B7ZCT1;Q9CX84	Regulator of G-protein signaling 19
Prss34	5.23556	2.51936	0.000120794	13.058	13.381	11.0511	17.8827	16.514	18.8002	No	Yes	25.0951	0	23.089	15	5	2	2	1	5	5	5	Q80UR4	Q80UR4
Bola1	5.23344	3.41207	0.00025641	9.72716	10.2852	8.37213	14.6494	14.6926	14.7428	Yes	Yes	21.9545	0	3.9052	3	3	0	1	0	2	2	2	Q9D8S9	Q9D8S9	BolA-like protein 1
Smc2	5.22509	3.95424	0	11.1513	12.2501	11.0158	16.6496	16.5004	16.9425	No	Yes	22.3775	0	9.7135	8	7	3	5	3	6	6	7	Q8CG48;B1AWH6	Q8CG48;B1AWH6	Structural maintenance of chromosomes protein 2
Serping1	5.2238	3.81269	0	12.4948	12.9883	12.6167	17.0868	18.2458	18.4386	No	Yes	24.4155	0	53.071	26	9	3	6	5	8	9	8	P97290;A2ATR8	P97290;A2ATR8	Plasma protease C1 inhibitor
Arhgap15	5.22308	3.88243	0.000344828	11.5243	11.188	NaN	16.6028	16.2662	16.8686	No	Yes	23.8194	0	4.1289	5	3	1	1	0	3	3	3	B1AW40;Q811M1	B1AW40;Q811M1	Rho GTPase-activating protein 15
Ncbp3	5.22178	2.94234	0.000217391	12.2585	9.81766	10.916	16.7191	15.8127	16.1257	No	Yes	23.1603	0	6.2038	5	4	2	1	1	4	4	3	Q8BZR9	Q8BZR9	Uncharacterized protein C17orf85 homolog
Ndufc2	5.2205	2.48958	0.000114943	11.9985	13.5075	10.5882	16.7761	16.6456	18.334	No	Yes	25.0217	0	13.516	11	4	1	3	1	3	2	4	Q9CQ54;A0A0U1RPJ5	Q9CQ54;A0A0U1RPJ5	NADH dehydrogenase [ubiquinone] 1 subunit C2
Mtch1	5.21819	2.4428	0.000108443	8.74211	11.4788	8.53283	14.2368	14.5789	15.5926	Yes	Yes	23.1025	0	2.4974	2	1	0	1	0	1	1	1	A0A3Q4EG99;A0A3Q4EBT8;D3YXC2;A0A3Q4EC24;A0A3Q4EGL4;Q791T5	A0A3Q4EG99;A0A3Q4EBT8;D3YXC2;A0A3Q4EC24;A0A3Q4EGL4;Q791T5	Mitochondrial carrier homolog 1
Ppp1r11	5.21613	3.41659	0.000253165	10.0213	10.1477	8.47395	14.8449	14.4318	15.0146	No	Yes	24.2576	0.0019037	1.6818	4	1	1	1	1	1	1	1	G3UZ30;A5A4Y9;Q8K1L5	G3UZ30;A5A4Y9;Q8K1L5	Protein phosphatase 1 regulatory subunit 11
Padi4	5.20967	4.35399	0	13.0838	13.3507	12.4131	18.4364	17.8599	18.1802	No	Yes	24.6393	0	123.21	29	12	4	7	4	11	12	11	Q9Z183;E9QAM4;Q9Z184	Q9Z183	Protein-arginine deiminase type-4
Ergic1	5.20803	3.02453	0.000245184	11.1207	13.4483	12.4394	17.646	17.0878	17.8988	No	Yes	24.6223	0	25.108	9	5	1	3	2	4	5	5	F6SLP4;A0A494BAW5;A0A494BAK4;Q9DC16;A0A494BAX4;A0A494B9M5;F6Z6A5	F6SLP4;A0A494BAW5;A0A494BAK4;Q9DC16;A0A494BAX4	Endoplasmic reticulum-Golgi intermediate compartment protein 1
Xrcc1	5.20758	3.01283	0.00024055	11.0217	8.97348	9.34248	15.4065	14.2947	15.2592	Yes	Yes	22.1421	0	2.951	2	1	0	0	0	1	1	1	Q60596	Q60596	DNA repair protein XRCC1
Gsn	5.20708	2.33088	9.25314e-05	12.6814	12.7444	9.45985	16.8725	16.4184	17.216	No	Yes	25.9307	0.0011145	1.8723	6	1	1	1	1	1	1	1	A6PWS5	A6PWS5
Igj	5.20597	4.99368	0	13.9397	14.2565	13.8235	19.2224	18.8911	19.524	No	Yes	28.1157	0	18.137	18	5	3	4	3	5	5	5	P01592	P01592	Immunoglobulin J chain
Dnajc9	5.20483	3.22772	0.000331754	13.2912	14.9831	13.0094	18.8294	18.8247	19.2441	No	Yes	27.0887	0	23.594	30	10	2	5	2	9	10	10	Q91WN1	Q91WN1	DnaJ homolog subfamily C member 9
Sp1	5.20358	4.04351	0	10.8119	11.7949	10.7134	15.9855	16.3397	16.6057	No	Yes	24.4677	0	8.344	7	4	2	2	2	4	4	4	G3X8Q0;O89090	G3X8Q0;O89090	Transcription factor Sp1
Lsm4	5.19691	2.9197	0.000205279	13.2093	10.7218	12.3833	17.1119	17.0712	17.722	No	Yes	25.9594	0	5.8298	13	3	2	1	2	3	3	3	D3YTP8;Q9CY46;Q9QXA5;A0A1B0GRR9;A0A1B0GQZ9	D3YTP8;Q9CY46;Q9QXA5;A0A1B0GRR9	U6 snRNA-associated Sm-like protein LSm4
Cd163	5.19245	3.02507	0.000242634	11.5502	12.696	10.9015	16.4199	16.4316	17.8736	No	Yes	23.1651	0	10.656	11	5	1	2	1	3	4	5	Q2VLH6	Q2VLH6	Scavenger receptor cysteine-rich type 1 protein M130;Soluble CD163
Sash1	5.1923	2.68095	0.000144181	9.38472	12.2816	10.3275	15.8604	15.4645	16.2459	Yes	Yes	20.8831	0	8.3172	7	5	0	2	0	4	4	4	F8VQK5;P59808;P57725	F8VQK5;P59808	SAM and SH3 domain-containing protein 1
Ndrg3	5.1914	4.39352	0	8.50022	8.59784	9.15135	13.5493	13.8884	14.3859	Yes	Yes	22.158	0.00056449	1.9864	2	1	0	0	0	1	1	1	Q8VCV2;Q9QYF9	Q8VCV2;Q9QYF9	Protein NDRG3
Rbmx	5.1875	2.64051	0.000134615	8.91017	10.6321	NaN	15.0756	14.6386	15.1617	No	Yes	22.3839	0.0024403	1.646	3	1	1	1	0	1	1	1	Q9WV02;A2AFI3;A2AFI4	Q9WV02;A2AFI3;A2AFI4	RNA-binding motif protein, X chromosome;RNA-binding motif protein, X chromosome, N-terminally processed
Kdm5a	5.18699	3.00417	0.000235294	10.4045	10.5633	8.44565	14.847	14.6714	15.456	Yes	Yes	22.3342	0.0034956	1.573	1	1	0	1	0	1	1	1	Q921T5;A0A0N4SVA7;Q3UXZ9	Q921T5;A0A0N4SVA7;Q3UXZ9	Lysine-specific demethylase 5A
Oard1	5.17969	4.17978	0	8.69069	7.55116	8.13016	13.5412	13.0552	13.3147	Yes	Yes	23.0321	0.0037303	1.4941	2	1	0	0	0	1	1	1	A0A3B2WCM9;Q8R5F3	A0A3B2WCM9;Q8R5F3	O-acetyl-ADP-ribose deacetylase 1
Itsn2	5.17647	2.59019	0.000127389	11.3919	12.8158	10.8408	16.5605	15.7844	18.2331	No	Yes	22.6045	0	29.235	18	8	2	4	2	7	5	7	E9QNG1;B2RR82;Q9Z0R6;A0A1W2P775	E9QNG1;B2RR82;Q9Z0R6;A0A1W2P775	Intersectin-2
Tiprl	5.17556	3.02494	0.000239726	11.1708	11.5228	11.079	16.0054	15.4969	17.7971	No	Yes	23.325	0	27.631	12	5	1	2	1	5	4	4	Q8BH58;A0A0A6YY87	Q8BH58	TIP41-like protein
Mrps18b	5.17376	2.25648	8.39329e-05	8.92687	9.90842	6.42546	12.7347	13.5326	14.5147	Yes	Yes	23.2731	0.0016407	1.7255	1	1	0	0	0	1	1	1	G3UYQ9;G3UYX8;G3UX79;Q99N84	G3UYQ9;G3UYX8;G3UX79;Q99N84	28S ribosomal protein S18b, mitochondrial
Srrm1	5.16892	4.01573	0	13.6461	13.354	12.5982	17.8957	18.5481	18.6613	No	Yes	24.2205	0	17.715	33	11	4	3	2	8	11	10	E9QKA4;A2A8V8;A2A8V9;E9PUK6;Q52KI8;F6UK16;A2A983;F7BWM1	E9QKA4;A2A8V8;A2A8V9;E9PUK6;Q52KI8	Serine/arginine repetitive matrix protein 1
Srp9	5.16597	3.32633	0.000318907	8.56002	8.84265	9.34492	NaN	13.7377	14.426	Yes	Yes	22.8936	0	5.2021	3	1	0	0	0	1	1	1	P49962	P49962	Signal recognition particle 9 kDa protein
Dclk1	5.16258	3.73798	0	9.63365	10.0571	9.78209	14.1426	15.164	15.654	No	Yes	22.7767	0	18.74	9	4	1	1	1	2	4	4	Q80VB6;A0A0G2JGQ6;Q9JLM8;A0A0G2JGR9;Q9CXL6;Q6PGI2;O88809	Q80VB6;A0A0G2JGQ6;Q9JLM8;A0A0G2JGR9	Serine/threonine-protein kinase DCLK1
Pold2	5.16175	3.27879	0.000295359	8.53738	7.52788	8.07691	NaN	13.0046	13.4136	Yes	Yes	20.4325	0	2.668	2	1	0	0	0	0	1	1	O35654	O35654	DNA polymerase delta subunit 2
Gnl1	5.16074	3.31854	0.000209424	9.994	8.22561	8.56135	13.769	13.9356	14.5585	Yes	Yes	21.2482	0.0049974	1.3747	3	1	0	1	0	1	1	1	P36916	P36916	Guanine nucleotide-binding protein-like 1
Pxk	5.15992	2.74908	0.000154525	11.2613	8.9907	8.69629	14.5936	14.5819	15.2526	Yes	Yes	22.3793	0	5.4121	3	1	0	0	0	1	1	1	A0A2C9F2B5;Q8BX57	A0A2C9F2B5;Q8BX57	PX domain-containing protein kinase-like protein
Hp	5.15793	3.61401	0.000327869	14.4205	15.173	13.5603	19.8833	19.3218	19.4225	No	Yes	26.8924	0	17.562	28	10	4	6	3	9	9	9	Q61646	Q61646	Haptoglobin;Haptoglobin alpha chain;Haptoglobin beta chain
Pon3	5.1574	3.87986	0	13.9806	14.2644	13.2129	18.9684	18.4859	19.4759	No	Yes	25.2413	0	30.885	27	6	5	5	4	6	6	5	Q62087	Q62087	Serum paraoxonase/lactonase 3
Clptm1	5.15704	2.80875	0.000171779	9.15819	10.3548	8.30828	13.4484	14.4948	15.3493	Yes	Yes	20.6345	0	8.8	2	2	0	1	0	1	2	2	Q8VBZ3	Q8VBZ3	Cleft lip and palate transmembrane protein 1 homolog
Taco1	5.15569	1.82719	0.000317881	11.1707	10.4866	6.36179	13.8982	14.2823	15.3057	Yes	Yes	22.5765	0.00083869	1.9114	3	2	0	0	0	2	2	2	Q8K0Z7	Q8K0Z7	Translational activator of cytochrome c oxidase 1
Hirip3	5.15528	3.4447	0.00025	10.1131	9.33969	8.66723	14.181	15.242	14.1629	Yes	Yes	21.7434	0	2.9125	2	3	1	0	0	3	3	2	Q8BLH7;D3YWU7	Q8BLH7	HIRA-interacting protein 3
Creld2	5.15412	4.80324	0	14.0677	14.1492	14.1037	19.5904	18.7787	19.4138	No	Yes	27.234	0	51.581	26	7	2	5	3	7	7	7	Q9CYA0	Q9CYA0	Cysteine-rich with EGF-like domain protein 2
Ddrgk1	5.15355	4.07093	0	11.1546	11.9514	10.804	16.5127	16.1399	16.718	No	Yes	24.1045	0	20.764	9	3	2	2	1	3	3	3	Q80WW9	Q80WW9	DDRGK domain-containing protein 1
Rap1a	5.15217	2.94444	0.000207101	13.4193	13.7668	11.6289	17.7157	17.7927	18.7631	No	Yes	24.9638	0	34.527	9	3	1	2	1	3	2	3	P62835;A0A0G2JE52;A0A0G2JED9	P62835;A0A0G2JE52;A0A0G2JED9	Ras-related protein Rap-1A
Wdr33	5.14995	2.85512	0.000181818	7.48699	7.3739	9.69979	13.4574	12.9334	13.6198	Yes	Yes	18.8569	0	8.4412	4	2	0	0	0	2	2	2	Q8K4P0;Q8K1G7;A0A3Q4EGD8;Q9D1P6	Q8K4P0;Q8K1G7;A0A3Q4EGD8;Q9D1P6	pre-mRNA 3 end processing protein WDR33
Adk	5.14819	2.37709	9.70201e-05	10.3654	12.6108	9.1379	16.2998	15.2535	16.0053	No	Yes	23.6934	0	13.217	10	3	2	2	2	3	2	3	P55264;A0A286YCD7;A0A286YCN3	P55264;A0A286YCD7	Adenosine kinase
Gm28778;Ormdl2;Ormdl1	5.14186	3.67754	0.000261438	8.49394	8.69918	8.77506	14.169	13.4268	NaN	Yes	Yes	22.1322	0	3.2093	1	1	0	0	0	1	1	0	A0A087WSK7;Q9CQZ0;Q921I0	A0A087WSK7;Q9CQZ0;Q921I0	ORM1-like protein 2;ORM1-like protein 1
Ptk2	5.13993	3.72269	0.000358744	11.4528	10.7945	10.2295	16.4533	15.4158	16.0276	No	Yes	22.209	0	5.8923	6	3	1	1	1	3	3	3	P34152;A0A5F8MPY3;A0A2I3BRG7	P34152;A0A5F8MPY3	Focal adhesion kinase 1
Pik3c3	5.13972	3.49168	0.000267559	10.1619	11.0316	11.1109	15.7361	15.2511	16.7364	No	Yes	22.0209	0	19.348	20	7	1	2	2	6	6	7	D3YZ98;E9QLS6;Q6PF93;E9Q824	D3YZ98;E9QLS6;Q6PF93	Phosphatidylinositol 3-kinase;Phosphatidylinositol 3-kinase catalytic subunit type 3
Obscn	5.13946	3.31437	0.000305677	9.43816	8.54583	9.02243	14.4234	13.8598	NaN	Yes	Yes	20.3253	0.0087584	1.2149	2	1	0	0	0	1	1	0	J9JIB2	J9JIB2
Polr2j	5.13573	3.84418	0	10.0105	9.17171	8.56551	14.3626	14.2158	14.5766	Yes	Yes	23.8656	0	8.3665	3	1	0	0	0	1	1	1	D3YZ20;Q6PI63;O08740	D3YZ20;Q6PI63;O08740	DNA-directed RNA polymerase II subunit RPB11
Tmsb4x	5.13326	4.70165	0	18.8314	18.4434	18.0785	23.7768	23.2991	23.6772	No	Yes	31.5934	0	114.55	67	6	4	4	4	6	6	6	P20065	P20065	Thymosin beta-4;Hematopoietic system regulatory peptide
Alox5	5.1262	3.21063	0.000305011	10.2849	10.6201	9.17948	15.8867	15.2521	14.3242	No	Yes	21.9345	0	5.301	5	4	1	2	1	4	4	2	P48999;E9QA93;E9Q6H6;A0A0N4SW45	P48999;E9QA93;E9Q6H6;A0A0N4SW45	Arachidonate 5-lipoxygenase
Ccbl2	5.12534	2.34674	9.21659e-05	9.65413	8.37903	7.52588	13.2724	NaN	14.0176	Yes	Yes	21.9906	0	2.4094	3	1	0	0	0	1	1	1	A0A0G2JGE1;Q71RI9	A0A0G2JGE1;Q71RI9	Kynurenine--oxoglutarate transaminase 3
Ero1lb	5.12359	2.94452	0.000203785	9.4862	10.5991	8.24322	15.1104	14.4606	14.1283	No	Yes	21.577	0	6.7568	5	4	1	3	1	4	4	3	Q8R2E9;A0A1Y7VJM4;A0A1Y7VNF4	Q8R2E9;A0A1Y7VJM4;A0A1Y7VNF4	ERO1-like protein beta
Ubxn7	5.12336	4.38235	0	11.3154	11.4837	10.7076	16.1308	16.041	16.7049	No	Yes	23.8754	0	10.074	9	3	1	2	1	2	3	3	G5E8R8;Q6P5G6	G5E8R8;Q6P5G6	UBX domain-containing protein 7
Gm5571	5.10525	2.38016	9.54329e-05	7.73616	11.2165	8.93787	14.276	14.8966	14.0337	Yes	Yes	24.2975	0	3.2644	2	1	0	1	0	1	1	1	A0A140T8N0;P01639	A0A140T8N0;P01639	Ig kappa chain V-V region MOPC 41
Acap2	5.09903	3.44075	0.000238095	12.4647	11.3361	10.6708	16.5873	16.3308	16.8505	No	Yes	22.5044	0	14.485	10	5	3	3	2	5	4	4	D4AFX6;A0A338P6P6;Q6ZQK5;A0A5F8MPT4	D4AFX6;A0A338P6P6;Q6ZQK5	Arf-GAP with coiled-coil, ANK repeat and PH domain-containing protein 2
Arhgap4	5.09414	4.08478	0	12.5616	13.329	12.3175	18.0474	17.4038	18.0393	No	Yes	24.3516	0	49.409	18	10	3	6	4	9	8	9	Q3TE27;B1AUX5;B1AUY2;Q80Z68;B1AUY3;E9PYS6;E9Q4R3;F6SL55;F6YWG4;B1AUY1	Q3TE27;B1AUX5;B1AUY2;Q80Z68;B1AUY3;E9PYS6;E9Q4R3
Mcm4	5.08963	4.73936	0	12.2018	12.1408	11.5291	17.2967	16.8329	17.0109	No	Yes	23.5167	0	31.485	14	9	4	2	3	9	8	8	P49717	P49717	DNA replication licensing factor MCM4
Prtn3	5.0884	5.61897	0	13.9392	13.8878	13.5001	18.99	18.7855	18.8168	No	Yes	26.7312	0	26.643	13	6	3	2	3	6	5	4	Q61096;A0A0R4IZY6;F6ZK01	Q61096;A0A0R4IZY6	Myeloblastin
Ghitm	5.07756	2.97222	0.000192572	10.4931	11.6844	NaN	16.1275	15.8561	16.5154	No	Yes	24.7914	0	4.773	5	2	1	1	0	2	2	2	Q91VC9;A0A286YDK2	Q91VC9;A0A286YDK2	Growth hormone-inducible transmembrane protein
Csnk1a1	5.07751	3.13428	0.000262664	10.6044	9.81181	8.50415	14.3039	14.7732	15.0757	No	Yes	22.2908	0	3.519	5	3	3	1	1	3	3	3	H7BXB1;E9Q4G7;E9PWB2;Q8BK63;E9Q2U6;E9Q3W1	H7BXB1;E9Q4G7;E9PWB2;Q8BK63;E9Q2U6;E9Q3W1	Casein kinase I isoform alpha
Nelfa	5.07713	3.2111	0.000259259	NaN	9.8289	8.92002	14.6848	14.0661	14.6039	No	Yes	17.929	0.0032319	1.5937	1	2	0	1	1	2	1	1	Q8BG30	Q8BG30	Negative elongation factor A
Emb	5.07175	2.61484	0.000126013	11.5173	9.38864	8.60796	15.2431	14.4741	15.012	Yes	Yes	22.5645	0.0013721	1.7692	2	1	0	0	0	1	1	1	P21995	P21995	Embigin
Eif1a;Gm8300;Gm2016;Gm2035;Gm5039	5.07083	3.02405	0.000224	9.41466	9.99492	8.01852	13.4622	14.5704	14.6079	Yes	Yes	22.8557	0.0027049	1.6353	3	1	0	0	0	1	1	1	A0A494BB95;Q60872;Q3UTA4;Q3TQZ4;J3QP87;J3QNT6;A0A1Y7VK80;A0A1Y7VJE9;Q8BX20;J3QQ02;J3QPI8;A0A1Y7VNG9;A0A1Y7VLT7;F6YNI8;Q3UT53;J3QMW5	A0A494BB95;Q60872;Q3UTA4;Q3TQZ4;J3QP87;J3QNT6;A0A1Y7VK80;A0A1Y7VJE9	Eukaryotic translation initiation factor 1A
Cutc	5.07024	2.64776	0.000131455	10.8172	8.20789	8.66917	13.7868	14.1294	14.9888	Yes	Yes	22.6558	0	3.0128	2	1	0	0	0	1	1	1	D3YY50;F8WHX2;Q9D8X1	D3YY50;F8WHX2;Q9D8X1	Copper homeostasis protein cutC homolog
Trmt2a	5.06431	3.29958	0.000280561	7.79606	7.20254	7.69192	13.048	NaN	12.2076	Yes	Yes	18.2029	0	4.2284	2	2	0	0	0	1	1	1	Q3UYU2;E9PUQ7;F6ZHN3;Q8BNV1	Q3UYU2;E9PUQ7;F6ZHN3;Q8BNV1	tRNA (uracil-5-)-methyltransferase homolog A
Bri3bp	5.06409	2.25927	8.19672e-05	13.8604	14.7719	13.4859	20.8362	17.1657	19.3086	No	Yes	27.9646	0.0013699	1.7391	8	2	1	2	1	2	2	2	Q8BXV2	Q8BXV2	BRI3-binding protein
Dffa	5.05644	2.97551	0.000191257	10.623	10.522	NaN	15.6566	14.9404	16.2899	No	Yes	23.1251	0	6.2242	9	4	1	1	0	4	3	4	O54786	O54786	DNA fragmentation factor subunit alpha
Gak	5.05378	2.16374	0.000167107	NaN	12.4671	9.98121	16.1948	15.9439	16.6951	No	Yes	22.4686	0	10.14	13	7	0	4	2	6	7	6	Q99KY4;A0A0R4J0F6;F7BG02	Q99KY4;A0A0R4J0F6	Cyclin-G-associated kinase
Mgea5	5.05353	3.20191	0.000252708	NaN	8.67227	8.78689	13.79	13.2158	14.3435	No	Yes	19.9493	0.0011161	1.8974	4	2	0	1	1	2	2	2	Q9EQQ9	Q9EQQ9	Protein O-GlcNAcase
Fcgr2b;Fcgr2;Fcgr3	5.04994	2.78633	0.000153846	9.01797	11.3581	9.07612	15.066	14.4139	15.1221	Yes	Yes	23.0341	0	2.3196	2	2	0	1	0	2	1	1	A0A0B4J1G1;E9Q415;A0A0B4J1E6;P08101;P08508	A0A0B4J1G1;E9Q415;A0A0B4J1E6;P08101;P08508	Low affinity immunoglobulin gamma Fc region receptor II;Low affinity immunoglobulin gamma Fc region receptor III
Tes	5.04923	3.27379	0.000318182	10.469	11.4843	9.92107	16.1219	14.9149	15.9853	No	Yes	21.9308	0	2.4319	4	3	2	2	2	3	3	3	Q3ULB1;Q921W7;P47226;D6RH72;A2ALC6	Q3ULB1;Q921W7;P47226;D6RH72	Testin
Dazap1	5.0483	4.04308	0	12.6772	13.4937	12.9929	17.6175	18.0598	18.6313	No	Yes	23.7704	0	13.361	10	3	2	3	2	3	3	3	Q9JII5;Q3UGB5;D3Z4J1	Q9JII5;Q3UGB5;D3Z4J1	DAZ-associated protein 1
Lrrc47	5.0477	4.06219	0	14.8511	14.8538	14.2425	19.0787	20.0936	19.9183	No	Yes	26.1084	0	104.64	58	19	11	10	8	18	19	18	E9PV22;Q505F5;F6YT33;F6Z4L9	E9PV22;Q505F5	Leucine-rich repeat-containing protein 47
Luc7l	5.04466	5.14073	0	11.3343	11.6874	11.342	16.185	16.5899	16.7228	No	Yes	24.6378	0	16.739	4	3	1	2	1	2	3	3	A0A0R4J047;Q9CYI4;D3Z765;D6RGP6	A0A0R4J047;Q9CYI4;D3Z765	Putative RNA-binding protein Luc7-like 1
Hip1r	5.04324	5.41026	0	10.9799	11.0177	10.6875	16.0885	15.6692	16.0572	No	Yes	21.6175	0	13.654	12	6	2	2	2	5	6	5	Q9JKY5;E9Q3C5;A0A0G2JFU3	Q9JKY5	Huntingtin-interacting protein 1-related protein
Kif4	5.04162	3.21159	0.000282828	7.77786	9.77701	8.66405	13.3765	14.1228	13.8444	Yes	Yes	20.0645	0	8.3178	2	2	0	0	0	2	2	2	P33174	P33174	Chromosome-associated kinesin KIF4
Fbn1	5.03847	3.24061	0.000294737	9.3892	9.86666	8.52151	13.951	13.7295	15.2123	Yes	Yes	19.2628	0.0011093	1.842	2	1	0	1	0	1	1	1	Q61554	Q61554	Fibrillin-1
Sept1	5.03691	2.47102	0.000105184	15.8824	14.0044	12.6973	19.1642	18.7114	19.8193	No	Yes	26.7579	0	33.313	19	9	5	7	3	8	7	6	A0A0U1RQA1;D3Z3V3;P42209;A0A0U1RPA8;D3YVG1	A0A0U1RQA1;D3Z3V3;P42209;A0A0U1RPA8;D3YVG1	Septin-1
Isg20l2	5.03605	2.658	0.000130841	10.9473	9.73197	8.00806	14.5076	14.3711	14.9169	Yes	Yes	21.9889	0	4.288	4	3	1	0	0	3	3	2	A0A0R4J0R3;Q3U1G5	A0A0R4J0R3;Q3U1G5	Interferon-stimulated 20 kDa exonuclease-like 2
Akr1e1;Akr1e2	5.03525	3.95262	0	9.43179	8.4614	9.26763	14.001	13.688	14.5775	Yes	Yes	19.5788	0.0016389	1.7192	2	2	0	1	0	2	2	2	Q8CEB6;Q9DCT1	Q8CEB6;Q9DCT1	1,5-anhydro-D-fructose reductase
Mef2a;Mef2d;Mef2c	5.03264	2.90723	0.000182529	8.78629	9.79175	7.56493	13.0231	13.9725	14.2452	Yes	Yes	23.9696	0	2.4822	3	1	0	1	0	1	1	1	S4R2H4;A0A0G2JFI7;Q921S6;E9Q5E0;E9QKT0;A0A0H2UH28;A0A0H2UKB6;A0A0G2JEC2;A0A0G2JDT0;A0A0G2JDQ1;A0A0G2JFS4;A0A0G2JE18;D3Z6M5;A0A0G2JES4;A0A0G2JFX1;A0A0G2JGL3;A0A0G2JFX2;A0A0G2JGK3;A0A0G2JET3;A0A0G2JDK0;A0A0G2JFL7;Q8CFN5;Q60929;Q63943	S4R2H4;A0A0G2JFI7;Q921S6;E9Q5E0;E9QKT0;A0A0H2UH28;A0A0H2UKB6;A0A0G2JEC2;A0A0G2JDT0;A0A0G2JDQ1;A0A0G2JFS4;A0A0G2JE18;D3Z6M5;A0A0G2JES4;A0A0G2JFX1;A0A0G2JGL3;A0A0G2JFX2;A0A0G2JGK3;A0A0G2JET3;A0A0G2JDK0;A0A0G2JFL7;Q8CFN5;Q60929;Q63943	Myocyte-specific enhancer factor 2C;Myocyte-specific enhancer factor 2A;Myocyte-specific enhancer factor 2D
Lancl2	5.03243	3.7156	0.00033195	8.53616	8.14303	9.32911	13.7193	13.1833	14.2031	Yes	Yes	21.2577	0	3.2436	2	1	0	0	0	1	1	1	F6RJV6;Q9JJK2	F6RJV6;Q9JJK2	LanC-like protein 2
Rab43	5.0293	3.56684	0.000210526	11.7081	11.4974	NaN	16.8172	16.1605	16.9183	No	Yes	24.6131	0	16.593	9	5	1	1	0	5	4	5	Q91Z34;Q8CG50	Q91Z34;Q8CG50	Ras-related protein Rab-43
Incenp	5.02758	1.52586	0.000660359	6.46663	10.9839	8.61939	NaN	14.0191	13.416	Yes	Yes	20.3082	0	5.6298	1	1	0	1	0	0	1	1	Q9WU62	Q9WU62	Inner centromere protein
Cbl	5.02523	2.84848	0.000167665	11.1034	13.1168	10.7969	16.9763	16.2004	16.916	No	Yes	22.7002	0	31.565	14	8	1	6	1	8	8	8	A0A0U1RQ85;P22682;A0A0X1KG61;A0A0U1RP47;A0A0U1RP17;A0A0U1RP95	A0A0U1RQ85;P22682;A0A0X1KG61;A0A0U1RP47	E3 ubiquitin-protein ligase CBL
Svil	5.02333	3.4872	0.000237389	9.1089	8.17316	9.80776	14.2924	14.2523	13.6151	Yes	Yes	17.2454	0	3.0643	4	2	1	0	0	2	1	1	Q8K4L2;E9Q3Z5;A0A1B0GS91;Q8K4L3	Q8K4L2;E9Q3Z5;A0A1B0GS91;Q8K4L3	Supervillin
Pcyt1a;Pcyt1b	5.02263	1.84013	0.000315545	6.56255	11.0484	10.2315	13.1851	14.4789	15.2464	Yes	Yes	21.6427	0	4.4735	4	2	0	0	0	2	1	2	P49586;D3Z3T5;Q811Q9	P49586;D3Z3T5;Q811Q9	Choline-phosphate cytidylyltransferase A;Choline-phosphate cytidylyltransferase B
Tnfaip8	5.02061	3.89982	0	14.0035	14.3236	13.0617	18.5104	18.9691	18.9711	No	Yes	27.4834	0	7.874	13	5	3	3	2	4	4	4	D3Z325;Q921Z5;D3Z205;D3Z0Q1	D3Z325;Q921Z5	Tumor necrosis factor alpha-induced protein 8
Cul3	5.02052	2.34034	8.81057e-05	11.0098	12.4387	8.81674	15.8868	15.4991	15.9409	No	Yes	21.9074	0	16.194	11	5	2	3	1	4	4	4	E9Q4T8;Q9JLV5	E9Q4T8;Q9JLV5	Cullin-3
Tmem19	5.01899	1.8246	0.000334983	12.1765	8.84484	7.06273	14.2555	14.0035	14.8819	Yes	Yes	24.198	0	3.4703	1	1	1	0	0	1	1	1	A0A1W2P7R5;A0A1W2P7P6;Q91W52	A0A1W2P7R5;A0A1W2P7P6;Q91W52	Transmembrane protein 19
Slc7a6os	5.00807	3.1738	0.00026465	7.81856	8.25427	9.7124	13.7117	13.1121	13.9856	Yes	Yes	22.2068	0	4.1581	1	1	0	0	0	1	1	1	Q7TPE5	Q7TPE5	Probable RNA polymerase II nuclear localization protein SLC7A6OS
Hdac1	5.00755	2.41616	9.66184e-05	13.3667	14.7164	11.2947	18.0875	17.8776	18.4354	No	Yes	24.6645	0	11.463	22	4	3	3	1	4	4	4	O09106	O09106	Histone deacetylase 1
Rpl5	5.00646	2.64574	0.000126812	14.9118	16.5049	13.768	19.6124	19.8211	20.7706	No	Yes	28.0341	0	47.596	41	12	6	10	4	11	12	12	P47962;D3YYV8	P47962;D3YYV8	60S ribosomal protein L5
Toe1	5.00473	4.24643	0	7.8388	8.69986	7.71893	13.0793	13.3085	12.8841	Yes	Yes	20.6204	0	6.625	4	1	0	0	0	1	1	1	Q9D2E2	Q9D2E2	Target of EGR1 protein 1
Igkv9-124	5.00177	3.03121	0.000214067	10.1189	8.9154	9.52038	14.8367	15.3449	13.3785	Yes	Yes	24.2249	0	24.891	2	1	0	0	0	1	1	1	A0A075B5K2	A0A075B5K2
Camk2g	5.00117	2.77291	0.000148462	9.00141	9.77787	7.22209	13.5315	13.2893	14.1841	Yes	Yes	19.5082	0	2.7632	2	2	0	1	0	2	2	2	A0A2I3BQP6;Q923T9;A0A286YCI7;A0A286YCH4;A0A286YCW8	A0A2I3BQP6;Q923T9	Calcium/calmodulin-dependent protein kinase type II subunit gamma
Ces1b;Ces1c;Ces1a;Ces1d;Ces1	5.00095	2.72878	0.000139581	6.55278	8.63837	8.81505	13.1647	12.2606	13.5838	Yes	Yes	20.396	0	4.2391	2	2	0	0	0	1	1	2	D3Z5G7;P23953;E9PYP1;Q8VCT4;Q8VCC2	D3Z5G7;P23953;E9PYP1;Q8VCT4;Q8VCC2	Carboxylic ester hydrolase;Carboxylesterase 1C;Carboxylesterase 1D;Liver carboxylesterase 1
Zranb2	4.99681	3.04428	0.000218069	12.1969	9.87927	10.8634	16.0331	15.7948	16.1021	No	Yes	24.065	0.0034759	1.5239	6	2	2	1	1	2	2	2	E9PUD0;D3Z4U0;Q9R020;A0A0G2JGE3;V9GX51;A0A0H2UH20	E9PUD0;D3Z4U0;Q9R020;A0A0G2JGE3;V9GX51;A0A0H2UH20	Zinc finger Ran-binding domain-containing protein 2
Cd38	4.99568	2.1147	0.000154523	14.0516	15.0594	11.0646	18.219	18.0176	18.9261	No	Yes	26.3283	0	10.718	12	4	2	3	2	4	4	4	P56528	P56528	ADP-ribosyl cyclase/cyclic ADP-ribose hydrolase 1
Ehd3	4.98989	1.92181	0.000270248	10.3955	10.4348	7.64566	12.7125	14.3444	16.3888	Yes	Yes	22.1277	0	14.155	5	3	0	0	0	2	2	3	Q9QXY6	Q9QXY6	EH domain-containing protein 3
Ddx56	4.98882	3.80635	0.000347826	8.54194	9.49303	8.20442	13.5737	13.523	14.1092	No	Yes	20.7137	0.0042531	1.4636	3	2	1	1	1	2	2	2	Q9D0R4	Q9D0R4	Probable ATP-dependent RNA helicase DDX56
Kif2a	4.98118	4.29543	0	13.5854	13.4081	12.834	17.8089	18.4091	18.5531	No	Yes	25.0902	0	65.104	33	15	7	5	5	15	15	15	P28740;E0CZ72;F8VQ42	P28740;E0CZ72;F8VQ42	Kinesin-like protein KIF2A;Kinesin-like protein
Sgsh	4.98061	3.15736	0.000254545	12.1551	13.0394	11.3526	16.5011	17.1021	17.8858	No	Yes	24.6581	0	8.653	12	4	3	4	1	4	4	4	Q9EQ08;B1ATE0	Q9EQ08;B1ATE0
Inpp5b	4.97897	1.9014	0.000300971	NaN	11.0417	8.08273	14.8916	13.8324	14.8996	No	Yes	20.4814	0	2.6721	3	2	0	2	1	2	1	2	Q8K337	Q8K337	Type II inositol 1,4,5-trisphosphate 5-phosphatase
	4.97787	3.5404	0.000243902	12.5091	13.5858	11.9414	17.8183	17.3863	17.7653	No	Yes	26.9271	0.0029674	1.6023	3	1	1	1	1	1	1	1	P01747;P01746	P01747;P01746	Ig heavy chain V region 36-65;Ig heavy chain V region 93G7
Sh2d1a	4.97772	2.68448	0.000131703	8.44576	11.3337	9.56502	14.9085	14.7031	14.6661	Yes	Yes	23.0252	0	8.384	6	3	0	2	0	3	3	3	O88890;S4R2F6	O88890	SH2 domain-containing protein 1A
Lias	4.97733	2.51855	0.00010878	9.36852	7.39363	9.88717	12.8712	13.9377	14.7724	Yes	Yes	21.613	0	2.6722	1	2	0	0	1	1	2	2	A0A0M3HEP3;Q99M04	A0A0M3HEP3;Q99M04	Lipoyl synthase, mitochondrial
Gnb5	4.97305	3.45182	0.000216802	8.97047	10.0511	8.25593	14.2179	13.9563	14.0224	Yes	Yes	21.9566	0.0013725	1.7703	6	1	0	0	0	1	1	1	P62881	P62881	Guanine nucleotide-binding protein subunit beta-5
Kras;Hras	4.97246	3.32263	0.000269231	9.08395	9.57628	NaN	14.2972	13.8614	14.7492	No	Yes	23.2222	0	12.714	2	2	1	1	0	1	2	1	P32883;C0H5X4	P32883;C0H5X4	GTPase KRas;GTPase KRas, N-terminally processed
Zfp652;Znf652	4.96133	3.39044	0.000288066	NaN	8.12689	7.94522	13.297	12.4536	13.2415	No	Yes	20.366	0	9.9553	2	1	0	1	1	1	1	1	F2Z443;Q5DU09	F2Z443;Q5DU09	Zinc finger protein 652
Cul4b;Cul4a	4.96032	4.36446	0	9.83974	10.6616	9.95279	15.0632	14.8469	15.4249	Yes	Yes	21.4363	0	2.7441	4	2	0	1	0	2	2	2	E9PXY1;A2A432;J3QJX0;Q3TCH7	E9PXY1;A2A432;J3QJX0;Q3TCH7	Cullin-4B;Cullin-4A
H2-Q10	4.95821	2.98841	0.000195258	8.94485	8.77711	9.48952	12.8934	14.0062	15.1866	Yes	Yes	21.2598	0	3.0338	1	2	0	1	0	1	2	2	P01898	P01898	H-2 class I histocompatibility antigen, Q10 alpha chain
Rbm22	4.95739	2.87156	0.000166667	7.59012	9.36561	8.913	14.5903	12.8261	13.3246	Yes	Yes	21.2587	0.0018996	1.6565	1	1	0	0	0	1	1	1	Q8BHS3	Q8BHS3	Pre-mRNA-splicing factor RBM22
Prkd2;Cdkl3;Stk36;Prkd3;Prkd1;Cdkl5;Cdkl1;Cdkl2	4.956	2.94202	0.000183486	9.20665	9.66421	8.51691	12.8673	14.3914	14.997	Yes	Yes	21.364	0.00028571	2.0837	3	2	0	0	0	1	2	2	Q8BZ03;B1AU42;E9Q341;F2Z3Z6;A0A0G2JGW6;B1AU43;D3Z6I0;A0A0G2JFE2;A0A0G2JF79;Q5FWX6;Q62101;Q3UTQ8;Q8K1Y2;Q8CEQ0;Q8BLF2;Q9QUK0;Q69ZM6	Q8BZ03;B1AU42;E9Q341;F2Z3Z6;A0A0G2JGW6;B1AU43;D3Z6I0;A0A0G2JFE2;A0A0G2JF79;Q5FWX6;Q62101;Q3UTQ8;Q8K1Y2;Q8CEQ0;Q8BLF2;Q9QUK0;Q69ZM6	Serine/threonine-protein kinase D2;Protein kinase C;Serine/threonine-protein kinase;Serine/threonine-protein kinase D1;Cyclin-dependent kinase-like 5;Serine/threonine-protein kinase D3;Cyclin-dependent kinase-like 1;Cyclin-dependent kinase-like 3;Cyclin-dependent kinase-like 2;Serine/threonine-protein kinase 36
Rnmt	4.95519	4.53925	0	10.5446	11.3227	11.0107	16.2264	15.6902	15.8269	No	Yes	23.2204	0	26.273	11	5	1	2	2	4	5	3	Q9D0L8;D3Z478;D3YYS7;D3Z4K1	Q9D0L8;D3Z478;D3YYS7	mRNA cap guanine-N7 methyltransferase
Nfatc2	4.95338	3.45902	0.000214477	9.52182	8.58381	8.21709	13.3737	13.3803	14.4289	Yes	Yes	21.2811	0.0013748	1.7791	2	1	0	0	0	1	1	1	Q8C443;A2AQC8;B5B2R5;Q60591	Q8C443;A2AQC8;B5B2R5;Q60591	Nuclear factor of activated T-cells, cytoplasmic 2
Kpna1	4.95329	3.21803	0.000268199	10.8746	11.2944	9.37832	15.6147	15.1374	15.6551	No	Yes	23.3003	0	3.5066	4	3	1	2	1	3	3	3	Q60960;G3UWJ8;G3UXT6;G3UZK5	Q60960;G3UWJ8;G3UXT6;G3UZK5	Importin subunit alpha-5;Importin subunit alpha-5, N-terminally processed
Arhgap27	4.94927	4.83434	0	10.3231	10.4226	10.2042	15.3478	14.8421	15.6078	No	Yes	21.9935	0	2.8892	4	2	1	1	1	2	2	2	A2AB59;A2AKN5	A2AB59;A2AKN5	Rho GTPase-activating protein 27
Bag1	4.94496	4.25097	0	12.3281	12.6464	12.5717	17.2307	17.0706	18.0798	No	Yes	24.8083	0	21.476	11	6	2	2	3	5	5	6	F6TCF9;Q60739	F6TCF9;Q60739	BAG family molecular chaperone regulator 1
Ctcf	4.94225	2.97008	0.000188934	10.9364	12.0852	10.1297	15.2565	16.0364	16.6851	No	Yes	23.5769	0	16.197	11	4	1	2	1	2	4	4	Q61164	Q61164	Transcriptional repressor CTCF
Inpp5f	4.93741	3.67793	0.000283688	9.34024	10.636	10.5322	15.0853	14.7852	15.4501	Yes	Yes	21.2196	0.0087651	1.2185	2	1	0	0	0	1	1	1	Q8CDA1	Q8CDA1	Phosphatidylinositide phosphatase SAC2
Ado	4.9363	2.50033	0.000104478	11.5758	10.1174	9.87521	NaN	15.1703	15.748	Yes	Yes	23.0117	0.00029146	2.2476	3	2	1	0	0	0	2	2	Q6PDY2	Q6PDY2	2-aminoethanethiol dioxygenase
Pex14	4.93626	2.30106	8.24499e-05	9.32719	7.99614	11.5022	14.4014	14.0684	15.1646	Yes	Yes	22.743	0	5.3977	3	2	0	0	0	2	1	1	Q9R0A0	Q9R0A0	Peroxisomal membrane protein PEX14
Cd177	4.93556	4.30176	0	15.6494	16.0989	15.5695	21.2229	20.3024	20.5991	No	Yes	27.312	0	51.543	49	14	9	10	10	14	13	13	Q8R2S8	Q8R2S8	CD177 antigen
Cdk11b	4.93352	2.75216	0.000138751	11.1317	12.4891	9.71799	16.094	15.9402	16.1051	No	Yes	22.6879	0	15.479	11	7	1	3	1	5	6	5	A2A9P6;P24788	A2A9P6;P24788	Cyclin-dependent kinase 11B
Gm10881	4.93252	3.49197	0.000223464	10.4676	10.1728	9.12256	14.37	14.7664	15.4241	Yes	Yes	24.9995	0.0011028	1.8028	0	1	0	0	0	1	1	1	P01642	P01642	Ig kappa chain V-V region L7
Rassf2	4.93237	2.80864	0.000149254	12.3563	13.8136	11.2544	17.4241	17.0135	17.7837	No	Yes	25.023	0	26.027	21	7	3	5	2	7	7	7	Q8BMS9;A2APB1;A2AVI0	Q8BMS9	Ras association domain-containing protein 2
Ikbkg	4.9319	4.16273	0	10.7025	11.491	10.8669	15.7301	15.6822	16.4438	No	Yes	24.4894	0	20.005	11	4	1	2	1	4	4	4	A3KG44;Q8VC91;E9Q2Y3;Q7TSS3;O88522;A3KG40;A3KG41;A3KG38	A3KG44;Q8VC91;E9Q2Y3;Q7TSS3;O88522;A3KG40;A3KG41;A3KG38	NF-kappa-B essential modulator
Pik3cb	4.92833	2.17849	0.000162384	8.72063	6.93778	10.7828	14.0066	13.0645	14.1552	Yes	Yes	20.0645	0	5.1687	1	1	0	0	1	1	1	1	Q8BTI9	Q8BTI9	Phosphatidylinositol 4,5-bisphosphate 3-kinase catalytic subunit beta isoform
Mien1	4.92606	2.08749	0.000148916	12.7573	10.1647	8.55148	15.4413	15.1143	15.696	No	Yes	24.9402	0	2.6641	4	2	1	1	1	2	2	2	Q9CQ86	Q9CQ86	Migration and invasion enhancer 1
Atrx	4.92429	4.89842	0	12.0844	12.7145	12.0241	17.2725	17.1592	17.1641	No	Yes	21.884	0	27.453	22	9	2	4	3	8	9	8	Q61687;F6RDB7;Q3UY26;Q8C2S3;A0A0G2JFA5;A0A0G2JED2	Q61687;F6RDB7	Transcriptional regulator ATRX
Ctsg	4.92154	4.70136	0	15.2296	14.3838	14.9639	19.825	19.7705	19.7465	No	Yes	27.8687	0	78.622	43	8	6	8	6	8	8	8	P28293	P28293	Cathepsin G
Cd40	4.91847	3.29857	0.000255941	9.84274	9.71471	NaN	14.5242	14.2988	15.2686	No	Yes	23.0781	0	9.7443	3	2	1	1	0	2	1	1	P27512;A2A5L7	P27512;A2A5L7	Tumor necrosis factor receptor superfamily member 5
Ncf1	4.91435	4.48041	0	14.2796	14.5838	13.9627	19.4968	18.7603	19.312	No	Yes	26.4415	0	45.032	26	9	4	7	3	8	8	8	S4R293;F8WH69;Q09014	S4R293;F8WH69;Q09014	Neutrophil cytosol factor 1
Arrb2	4.91356	4.83264	0	12.0132	12.6138	12.1621	17.1106	16.9637	17.4555	No	Yes	24.8257	0	31.069	14	6	2	1	2	4	4	5	Q91YI4;Q5F2D9;J3QNV6	Q91YI4;Q5F2D9	Beta-arrestin-2
Gatad2a	4.91332	2.10704	0.000151269	9.1691	10.0868	7.3538	15.5274	12.436	13.3863	Yes	Yes	21.0283	0	4.1787	2	2	0	1	0	2	1	1	A0A1I7Q4G8;E9QMN5;Q8CHY6	A0A1I7Q4G8;E9QMN5;Q8CHY6	Transcriptional repressor p66 alpha
Nfyb	4.91308	3.04412	0.000189702	10.0131	9.14899	8.84313	NaN	14.1052	14.3911	Yes	Yes	24.2816	0	3.023	2	1	0	0	0	0	1	1	D3Z723;P63139	D3Z723;P63139	Nuclear transcription factor Y subunit beta
Acp5	4.91115	3.15327	0.000239316	14.8027	15.762	13.8343	19.1492	20.0249	19.9583	No	Yes	27.6497	0	83.584	39	9	4	3	2	6	8	8	Q05117	Q05117	Tartrate-resistant acid phosphatase type 5
Ppp4r1	4.91002	3.41546	0.000340633	11.216	12.2501	10.504	16.5485	16.0044	16.1472	No	Yes	22.5709	0	7.4261	9	7	2	5	1	6	6	5	E9PX53;E9QPR5;Q8K2V1;E0CYV2;F6TLH3;E0CXK8;F6V294;E0CX37	E9PX53;E9QPR5;Q8K2V1;E0CYV2;F6TLH3;E0CXK8	Serine/threonine-protein phosphatase 4 regulatory subunit 1
Ighv6-3;Ighv6-7;Ighv6-6	4.90757	2.44206	9.58904e-05	10.4099	11.3894	NaN	14.8191	16.1075	16.495	No	Yes	25.1084	0	17.35	4	2	1	1	0	1	2	1	A0A075B5T2;P01799;P01797;P01796;P01801;A0A0A6YWU3;A0A075B5T3;P01804;P01803;P01800;P01798;P01802	A0A075B5T2;P01799;P01797;P01796;P01801;A0A0A6YWU3;A0A075B5T3;P01804;P01803;P01800;P01798;P01802	Ig heavy chain V-III region ABE-47N;Ig heavy chain V-III region U61;Ig heavy chain V-III region A4;Ig heavy chain V-III region J606;Ig heavy chain V-III region HPC76;Ig heavy chain V region AMPC1;Ig heavy chain V-III region T957;Ig heavy chain V-III region E109;Ig heavy chain V-III region W3082
0610011F06Rik	4.90479	4.55804	0	9.59441	9.88267	9.74179	14.6306	14.2035	15.0991	No	Yes	23.0443	0	3.4338	3	2	1	1	1	2	2	2	Q9DCS2;E9Q5B2;G5E8X1	Q9DCS2;E9Q5B2;G5E8X1	UPF0585 protein C16orf13 homolog
Cyfip2	4.9029	2.35886	8.65801e-05	13.5373	10.2171	12.4467	16.9374	16.4506	17.5218	No	Yes	21.276	0	7.0677	10	4	2	1	2	3	4	4	Q5SQX6;F6QD74	Q5SQX6;F6QD74	Cytoplasmic FMR1-interacting protein 2
Rabgap1	4.89947	2.90847	0.000159091	NaN	10.3532	9.61932	14.3429	14.807	15.5073	No	Yes	21.3631	0	3.9514	4	2	0	1	1	1	2	2	A2AWA9	A2AWA9	Rab GTPase-activating protein 1
Uba5	4.89564	2.48534	0.000100647	9.27603	10.9401	NaN	14.7849	14.6563	15.5699	No	Yes	23.4897	0	2.8381	3	2	1	1	0	2	2	2	F6VRI6;D6RH76;Q8VE47	F6VRI6;D6RH76;Q8VE47	Ubiquitin-like modifier-activating enzyme 5
Ppp1r12c	4.89529	2.26505	0.000119842	8.73234	10.7876	NaN	14.8728	14.0465	15.0464	No	Yes	21.1766	0	12.526	9	3	1	2	0	3	3	3	Q3UMT1;F6XWD4	Q3UMT1;F6XWD4	Protein phosphatase 1 regulatory subunit 12C
Naa15;Naa16	4.88724	2.6078	0.000114566	10.3966	11.9397	NaN	15.9212	15.7249	16.5201	No	Yes	21.7804	0	7.1478	11	4	1	1	0	4	4	4	G3X8Y3;Q80UM3;A0A0A6YW80;A0A0A6YX86;E9PZ53;Q9DBB4;A0A0A6YXF4	G3X8Y3;Q80UM3;A0A0A6YW80;A0A0A6YX86;E9PZ53;Q9DBB4	N-alpha-acetyltransferase 15, NatA auxiliary subunit;N-alpha-acetyltransferase 16, NatA auxiliary subunit
Wdr11	4.88517	3.6741	0.000207792	NaN	9.88263	10.167	15.109	15.1174	14.5035	No	Yes	20.0862	0.0047443	1.3961	2	2	0	1	1	2	2	1	Q8K1X1;G5E8J3;A0A0U1RQ40	Q8K1X1;G5E8J3;A0A0U1RQ40	WD repeat-containing protein 11
Cecr5	4.8758	5.02748	0	12.7783	12.8079	12.6106	17.6313	17.2571	17.9358	No	Yes	25.2373	0	10.491	9	4	2	2	2	3	3	3	Q91WM2	Q91WM2	Cat eye syndrome critical region protein 5 homolog
Dhdh	4.87499	3.18356	0.000243056	7.23025	6.57406	8.32461	11.8436	12.0064	12.9039	Yes	Yes	20.3906	0.00029104	2.2242	2	1	0	0	0	1	1	1	Q9DBB8	Q9DBB8	Trans-1,2-dihydrobenzene-1,2-diol dehydrogenase
Uimc1	4.87419	3.88572	0.00034632	7.97402	9.18142	9.01781	13.558	13.3961	13.8417	Yes	Yes	21.206	0	4.395	4	3	0	0	0	2	2	3	A0A0R4J183;E9Q577;A0A0R4J073;Q5U5Q9;E9PWM5	A0A0R4J183;E9Q577;A0A0R4J073;Q5U5Q9	BRCA1-A complex subunit RAP80
Tubb6	4.87156	2.09352	0.000147388	9.9641	11.6476	7.51133	14.6192	14.211	14.9075	Yes	Yes	21.8416	0.0005618	1.9542	3	2	0	1	0	2	2	2	Q922F4	Q922F4	Tubulin beta-6 chain
Ecm29;AI314180	4.86692	2.87969	0.000157127	11.6053	13.1384	10.7482	16.5753	16.4067	17.1106	No	Yes	21.3716	0	32.593	20	11	3	9	2	10	11	11	Q6PDI5;A2ALV7;A2ALV6;A2ALV8;A2ALW1;A2ALV9	Q6PDI5;A2ALV7;A2ALV6	Proteasome-associated protein ECM29 homolog
Dcaf13	4.86282	3.46343	0.000199501	9.53618	8.81141	8.58056	14.1308	13.0036	14.3822	Yes	Yes	18.9836	0.005506	1.3388	0	2	0	0	0	2	1	1	Q6PAC3	Q6PAC3	DDB1- and CUL4-associated factor 13
Ppp6r3	4.86095	4.76529	0	9.5261	9.58101	9.94727	14.8705	14.1849	14.5819	No	Yes	21.0277	0	11.885	4	2	1	1	1	2	2	2	Q922D4;G5E8R4;A0A286YE88	Q922D4;G5E8R4;A0A286YE88	Serine/threonine-protein phosphatase 6 regulatory subunit 3
Bccip	4.85591	1.905	0.00029442	4.91574	9.43395	8.52796	12.3734	12.3098	12.7622	Yes	Yes	20.4164	0.0034937	1.566	2	1	0	1	0	1	1	1	Q9CWI3	Q9CWI3	BRCA2 and CDKN1A-interacting protein
Acsl4	4.854	3.4323	0.000332542	9.99091	9.30503	8.31257	13.8708	13.8731	14.4266	Yes	Yes	20.943	0	6.7042	3	3	0	1	0	2	3	2	Q9QUJ7	Q9QUJ7	Long-chain-fatty-acid--CoA ligase 4
Mapkapk2	4.85231	2.83749	0.000148778	12.69	12.9253	10.6196	16.6708	17.1912	16.9298	No	Yes	23.6143	0	5.3703	13	3	3	3	3	3	3	2	P49138;A0A087WSN7;B1AVU1;Q9D2E1;Q922R0	P49138;A0A087WSN7	MAP kinase-activated protein kinase 2
Wdr46	4.84899	1.86778	0.000338722	11.0219	6.58933	8.24011	14.5921	12.572	13.2342	Yes	Yes	20.8312	0	4.0003	1	2	0	0	0	2	1	1	Q9Z0H1;A0A3Q4EBZ6	Q9Z0H1;A0A3Q4EBZ6	WD repeat-containing protein 46
Dcaf8	4.84354	3.49395	0.000292276	NaN	9.82819	9.32157	14.1825	14.2511	14.8217	No	Yes	21.673	0	3.4372	3	1	0	1	1	1	1	1	Q8N7N5	Q8N7N5	DDB1- and CUL4-associated factor 8
Cops3	4.84348	4.06472	0	12.0517	12.8222	11.8159	17.2145	16.6994	17.3063	No	Yes	24.0309	0	19.762	11	6	1	4	1	6	6	6	O88543	O88543	COP9 signalosome complex subunit 3
Sympk	4.84086	4.48567	0	11.5314	11.1251	10.6601	16.1692	15.7494	15.9205	No	Yes	21.8958	0	6.4074	15	7	2	2	2	7	7	6	Q80X82;S4R2Q3;D3Z2M2	Q80X82	Symplekin
Ighv5-16	4.8408	2.57118	0.000108275	9.27266	7.83837	7.98342	13.6232	12.788	NaN	Yes	Yes	22.1264	0.001108	1.8355	0	1	0	0	0	1	1	0	A0A075B5R0;A0A0B4J1P4	A0A075B5R0;A0A0B4J1P4
Ufl1	4.8401	2.99724	0.000183246	11.3892	12.2003	10.0396	15.7603	15.8536	16.5356	No	Yes	22.5826	0	19.088	12	6	3	4	1	5	6	6	Q8CCJ3	Q8CCJ3	E3 UFM1-protein ligase 1
Itpr2	4.83968	2.87252	0.000153509	9.02183	9.97855	8.65007	14.7413	12.833	14.5951	Yes	Yes	18.0524	0	3.4886	2	3	0	0	0	3	2	3	Q9Z329;B2KF89	Q9Z329	Inositol 1,4,5-trisphosphate receptor type 2
Ccdc88a	4.83887	3.43559	0.000330189	8.53997	7.79399	8.76776	12.6143	12.9689	14.0351	Yes	Yes	18.8161	0	5.1795	1	1	0	0	0	1	1	1	A0A6I8MX08;Q5SNZ0	A0A6I8MX08;Q5SNZ0	Girdin
Ube2z	4.83194	3.41256	0.000266667	NaN	11.0188	11.0768	15.9319	15.3969	16.3104	No	Yes	24.1601	0.0013717	1.7619	1	1	0	1	1	1	1	1	Q3UE37	Q3UE37	Ubiquitin-conjugating enzyme E2 Z
Ccsap	4.83136	3.52786	0.000301075	NaN	8.75612	8.16889	13.1498	13.0919	13.6399	No	Yes	21.8074	0.0042576	1.4747	2	1	0	1	1	1	1	1	Q8QZT2	Q8QZT2	Centriole, cilia and spindle-associated protein
Smarcb1	4.8275	1.36159	0.000935752	7.6308	8.10021	8.43797	NaN	10.3348	15.4328	Yes	Yes	21.5451	0	4.3574	2	2	0	1	0	0	1	2	Q9Z0H3;F6U415	Q9Z0H3;F6U415	SWI/SNF-related matrix-associated actin-dependent regulator of chromatin subfamily B member 1
Gbe1	4.82745	3.18317	0.000208644	NaN	10.9495	10.2239	15.7815	14.9678	15.4932	No	Yes	21.6826	0	13.906	6	3	0	2	1	3	3	3	Q9D6Y9;F6ZHD8;G3UW30	Q9D6Y9;F6ZHD8;G3UW30	1,4-alpha-glucan-branching enzyme
Srsf1	4.82735	3.50309	0.000202532	16.7195	17.5556	15.9488	21.3088	21.4889	21.9083	No	Yes	29.4163	0	53.717	87	13	11	11	10	13	13	13	H7BX95;Q6PDM2;F7AI47;F6QXN3	H7BX95;Q6PDM2	Serine/arginine-rich splicing factor 1
Eno3	4.82678	4.92089	0	11.7853	12.0509	12.1338	16.4397	16.9752	17.0354	No	Yes	23.576	0	51.975	16	5	2	2	3	5	5	5	P21550;Q5SX59;Q5SX60;Q5SX61;J3QPZ9	P21550;Q5SX59	Beta-enolase;Enolase
Nhlrc2	4.81804	1.3929	0.000899196	9.7746	8.4305	8.78991	12.2174	11.3738	17.858	Yes	Yes	23.3099	0	5.9094	4	3	0	0	0	2	1	3	Q8BZW8	Q8BZW8	NHL repeat-containing protein 2
U2af1;U2af1l4	4.81539	4.01026	0.00037037	14.8435	15.0676	13.9724	19.1889	19.4243	19.7165	No	Yes	27.9814	0	56.471	29	8	5	7	3	7	7	7	Q9D883;G3UW94;Q8BGJ9;E9Q1I7;E9PUZ3;E9Q5Y2;A0A494BA95;E9Q5J3;F8WH71;A0A494B947;E9Q809;A0A494B9X9;A0A140LII6;E9PWA1;F7D8X7;E9PWM2;E9PWX6	Q9D883;G3UW94;Q8BGJ9;E9Q1I7;E9PUZ3;E9Q5Y2	Splicing factor U2AF 35 kDa subunit;Splicing factor U2AF 26 kDa subunit
Hagh	4.81349	4.90792	0	11.6946	11.5467	11.3368	16.4033	15.9811	16.6343	No	Yes	23.3328	0	13.523	15	4	2	1	1	4	4	4	E9PYA3;A0A0R4J052;G5E8T9;Q99KB8;E9Q2H8;D3YWI0	E9PYA3;A0A0R4J052;G5E8T9;Q99KB8;E9Q2H8	Hydroxyacylglutathione hydrolase, mitochondrial
Bcam	4.80613	1.99604	0.000205172	10.4872	9.57829	7.85005	13.6258	NaN	14.5968	Yes	Yes	21.3351	0	8.0143	2	2	1	0	0	2	0	2	D3YTK7;Q9R069	D3YTK7;Q9R069	Basal cell adhesion molecule
Brd3	4.79996	3.92092	0.000239521	11.0291	11.1887	NaN	15.6455	15.8491	16.232	No	Yes	22.412	0	9.5879	6	4	1	1	0	4	4	4	Q8K2F0;A2AKA9	Q8K2F0;A2AKA9	Bromodomain-containing protein 3
Hells	4.79988	3.69915	0.000255591	8.34809	9.75148	9.43665	13.9062	14.1986	13.8311	Yes	Yes	20.7138	0	9.5639	3	3	0	0	1	2	3	2	Q60848	Q60848	Lymphocyte-specific helicase
Utrn	4.79582	3.04376	0.000189959	8.38446	9.63592	7.659	13.187	12.9403	13.9396	Yes	Yes	18.0479	0	3.9087	1	1	0	0	0	1	1	1	E9Q6R7	E9Q6R7
Rgs3	4.79552	2.95666	0.00015625	9.58428	10.5664	NaN	14.4928	14.7836	15.3362	No	Yes	21.3096	0	2.9273	6	3	1	1	0	3	2	2	Q9DC04;F6X4A2;Q542M0;I7HPB2;Z4YJQ4	Q9DC04;F6X4A2;Q542M0	Regulator of G-protein signaling 3
Wdr82	4.79552	1.83237	0.000383234	12.0286	12.2742	7.84595	15.4606	15.2748	15.8	No	Yes	23.0816	0.0034806	1.5302	4	2	1	1	1	2	2	2	Q8BFQ4;A0A1L1SV91;A0A1L1SUX7;A0A1L1SRB6	Q8BFQ4;A0A1L1SV91;A0A1L1SUX7;A0A1L1SRB6	WD repeat-containing protein 82
Mri1	4.79242	2.59868	0.000110847	11.0564	13.9249	12.8693	17.1869	17.2626	17.7784	No	Yes	24.6696	0	38.824	12	6	2	4	1	5	6	5	Q9CQT1;F8WI95;F6YY88	Q9CQT1;F8WI95;F6YY88	Methylthioribose-1-phosphate isomerase
Usp4	4.78709	4.63769	0	9.72819	9.39084	9.18896	14.0777	13.9761	14.6154	Yes	Yes	22.0678	0	2.9687	2	1	1	0	0	1	1	1	A0A0A6YWM7;A0A0A6YVY7;A0A0A6YW28;P35123	A0A0A6YWM7;A0A0A6YVY7;A0A0A6YW28;P35123	Ubiquitin carboxyl-terminal hydrolase;Ubiquitin carboxyl-terminal hydrolase 4
Alg5	4.7862	2.24854	0.000167639	11.2623	12.5094	8.97765	15.2564	15.5797	16.2719	No	Yes	23.4362	0	9.5944	6	4	2	3	1	3	4	4	Q9DB25;D6RCG2	Q9DB25	Dolichyl-phosphate beta-glucosyltransferase
Xrn2	4.78549	4.28641	0	12.7436	12.8562	12.2564	17.5302	16.9221	17.7604	No	Yes	23.5043	0	35.432	18	7	3	5	2	7	7	7	Q9DBR1	Q9DBR1	5-3 exoribonuclease 2
Nsun2	4.78534	5.22035	0	12.4186	12.4371	12.8621	17.4325	17.4959	17.1455	No	Yes	24.027	0	14.289	16	8	2	2	3	7	8	7	H3BKN0;Q1HFZ0	H3BKN0;Q1HFZ0	tRNA (cytosine(34)-C(5))-methyltransferase
Tmem106b	4.78405	3.9913	0.000349345	10.2571	10.9109	9.95652	14.9383	14.9035	15.6349	No	Yes	23.5823	0	2.327	3	2	1	1	1	2	2	2	Q80X71;D3Z6E0;D3Z0M2;D3Z191	Q80X71;D3Z6E0;D3Z0M2;D3Z191	Transmembrane protein 106B
Serpinc1	4.78174	3.71285	0.000254777	11.7246	12.1205	11.4945	15.7908	16.8039	17.0901	No	Yes	23.4869	0	25.454	14	7	3	3	2	5	7	7	P32261;A0A0A6YXS8;A0A0A6YX49;A0A0A6YWH7;CON__P41361	P32261	Antithrombin-III
Psd4	4.78174	2.78395	0.000135005	7.98407	10.1147	7.8486	13.813	13.1129	13.3667	Yes	Yes	20.1487	0.0016367	1.7049	1	1	0	1	0	1	1	1	Q8BLR5	Q8BLR5	PH and SEC7 domain-containing protein 4
Kif2c	4.78048	3.46142	0.000325581	9.5781	9.54123	8.84255	14.1912	14.8211	13.2911	Yes	Yes	21.4401	0	4.5767	1	2	0	0	0	2	2	1	Q3TTL2;Q922S8	Q3TTL2;Q922S8	Kinesin-like protein;Kinesin-like protein KIF2C
Sec62	4.77646	3.4192	0.000307692	12.5526	13.4953	12.3136	17.3935	17.0248	18.2725	No	Yes	24.0407	0	8.8044	10	4	2	3	2	4	4	4	Q8BU14	Q8BU14	Translocation protein SEC62
Pla2g16	4.77312	1.61638	0.000519115	NaN	10.9994	8.82053	14.7114	NaN	14.6548	No	Yes	23.1851	0	2.2846	3	1	0	1	1	1	1	1	Q8R3U1	Q8R3U1	HRAS-like suppressor 3
Fip1l1	4.77132	2.48647	9.5498e-05	9.62984	8.69446	7.05927	14.2407	12.4591	12.9977	Yes	Yes	21.0481	0	4.8584	1	1	0	0	0	1	1	1	D3Z3F1;Q9D824	D3Z3F1;Q9D824	Pre-mRNA 3-end-processing factor FIP1
Pfdn2	4.76575	6.1416	0	12.8801	13.1536	12.9374	17.7255	17.6621	17.8808	No	Yes	25.3315	0	19.091	10	4	1	1	2	4	4	3	O70591;F8WJ30	O70591;F8WJ30	Prefoldin subunit 2
Ilk	4.76454	3.26049	0.000248668	13.9188	14.4307	12.9098	18.3977	17.9818	19.1733	No	Yes	25.9599	0	27.373	30	11	4	7	4	11	11	11	O55222;D3YZA5;A0A1B0GRF6;A0A1B0GR42	O55222	Integrin-linked protein kinase
Dnajb1	4.76317	4.39072	0	11.33	12.2051	11.3585	16.3259	16.4831	16.3742	No	Yes	24.5649	0	18.747	15	7	2	4	2	7	6	7	Q3TYL7;Q9QYJ3	Q3TYL7;Q9QYJ3	DnaJ homolog subfamily B member 1
Ighv5-17;Ighv5-6	4.76188	2.19654	0.000159435	11.8384	NaN	11.926	15.9874	15.9254	18.0195	No	Yes	25.1746	0	26.03	5	2	1	0	1	2	2	2	P18528;A0A075B5R1;A0A075B5Q0;P18527;P18529;P18526	P18528;A0A075B5R1;A0A075B5Q0;P18527;P18529;P18526	Ig heavy chain V region 6.96;Ig heavy chain V region 914;Ig heavy chain V region 5-76;Ig heavy chain V region 345
Selo	4.76123	2.25196	0.000168623	9.08497	8.03542	10.2327	13.5809	14.177	NaN	Yes	Yes	20.7687	0.0037343	1.5049	2	2	0	0	0	1	1	0	Q9DBC0	Q9DBC0	Selenoprotein O
Polb	4.75592	3.18116	0.00022082	8.90433	10.4509	8.51703	13.9344	14.0671	14.1385	Yes	Yes	23.3456	0.0064885	1.2665	1	1	0	1	0	1	1	1	A0A1B0GT62;Q8K409	A0A1B0GT62;Q8K409	DNA polymerase beta
S100a6	4.75161	4.47526	0	16.9398	16.8942	16.7256	22.1299	21.4386	21.2459	No	Yes	31.3897	0	8.5378	9	2	1	2	2	2	2	2	P14069	P14069	Protein S100-A6
Tlr13	4.75042	3.0354	0.000181113	9.56114	8.9366	10.7213	13.7526	14.6806	15.0371	Yes	Yes	20.8223	0	3.3623	4	3	0	1	0	2	3	2	Q6R5N8	Q6R5N8	Toll-like receptor 13
Nfatc2ip	4.7504	1.86958	0.000333966	8.03737	10.4113	5.65821	13.0617	12.3104	12.986	Yes	Yes	21.1822	0	4.1793	1	1	0	1	0	1	1	1	O09130	O09130	NFATC2-interacting protein
Mpo	4.748	4.74329	0	18.663	18.8245	18.3885	23.6459	22.9861	23.4881	No	Yes	29.8557	0	146.31	168	26	19	21	15	24	24	25	P11247;F7DC05;F8WGZ9;A0A0A0MQL9	P11247	Myeloperoxidase;Myeloperoxidase light chain;Myeloperoxidase heavy chain
Gyg1;Gyg	4.74446	2.3095	0.000118834	10.4013	11.9269	8.57236	15.704	14.6591	14.7709	Yes	Yes	23.6889	0	26.748	5	2	0	2	0	2	2	2	Q9R062;K3W4S6;V9GX26	Q9R062;K3W4S6;V9GX26	Glycogenin-1
Akap8l	4.74398	3.88495	0.000304183	10.5289	10.4227	9.39641	15.078	14.9187	14.5832	No	Yes	21.8883	0	3.9222	4	2	1	1	1	2	2	1	A0A494B9L0;Q5RL57;Q9R0L7;A0A494B9R0;A0A494BBL1	A0A494B9L0;Q5RL57;Q9R0L7;A0A494B9R0;A0A494BBL1	A-kinase anchor protein 8-like
Tma16	4.74327	3.92159	0.000228571	10.3973	NaN	10.9611	15.4444	15.2979	15.5251	No	Yes	24.0471	0	18.391	5	2	1	0	2	2	2	2	Q9CR02	Q9CR02	Translation machinery-associated protein 16
Odr4	4.74035	1.90044	0.000316893	11.8522	7.19426	9.91802	14.4408	14.1248	14.6199	Yes	Yes	22.0358	0	6.0603	3	2	1	0	0	2	2	2	Q4PJX1	Q4PJX1	Protein odr-4 homolog
Guk1	4.73801	2.1999	0.000157449	9.40797	8.18255	9.93476	11.9754	14.7638	15.0002	Yes	Yes	22.3419	0	3.8593	4	3	0	0	0	1	3	3	E9Q7K1;Q64520	E9Q7K1;Q64520	Guanylate kinase
Rngtt	4.73699	3.64285	0.000313199	9.60135	NaN	9.38472	14.232	13.8678	14.5903	No	Yes	20.8998	0	2.5321	2	2	1	0	1	2	2	2	Q9DCC1;O55236	Q9DCC1;O55236	mRNA-capping enzyme;Polynucleotide 5-triphosphatase;mRNA guanylyltransferase
Cd22	4.7361	1.8714	0.000333586	11.2475	13.8201	9.17607	16.1936	15.5338	16.7246	No	Yes	21.407	0	30.543	14	5	1	4	1	4	4	5	Q3UP36;P35329;A0A1L1SSS3;A0A087WR31;A0A087WR96	Q3UP36;P35329;A0A1L1SSS3	B-cell receptor CD22
Slk	4.73435	3.86224	0.000294118	12.2184	11.3675	12.4742	16.8607	16.3531	17.0495	No	Yes	22.0114	0	11.027	11	7	2	1	3	6	4	4	O54988;A0A5F8MPV2	O54988	STE20-like serine/threonine-protein kinase
Fyn;Yes1	4.7264	2.26052	0.000166755	12.3004	14.5691	11.0446	17.2593	17.0462	17.7879	No	Yes	24.9235	0	6.5549	11	3	1	1	1	3	3	3	D3YZ57;P39688;Q04736;P05480	D3YZ57;P39688;Q04736	Non-specific protein-tyrosine kinase;Tyrosine-protein kinase Fyn;Tyrosine-protein kinase Yes
Ighv2-9-1	4.72585	2.24234	0.000163646	9.01244	7.39526	10.5825	12.6935	14.5275	13.9468	Yes	Yes	24.5214	0	5.1889	1	1	0	0	0	1	1	1	A0A075B697;P01820;P01819	A0A075B697;P01820;P01819	Ig heavy chain V region PJ14;Ig heavy chain V region MOPC 141
Mcl1	4.72488	3.08288	0.000174782	NaN	10.0655	10.1207	15.3128	14.1784	14.9629	No	Yes	22.8083	0.0072445	1.2492	2	2	0	1	1	2	2	2	P97287	P97287	Induced myeloid leukemia cell differentiation protein Mcl-1 homolog
Chil3	4.7218	3.39161	0.00027833	18.8827	19.2516	18.0446	24.1546	22.8661	23.3237	No	Yes	30.8786	0	225.01	146	22	15	15	11	22	21	21	O35744;F6RU51	O35744	Chitinase-like protein 3
Raver1	4.72165	2.55706	0.000101966	12.3013	13.2117	12.3603	17.7701	15.768	18.5002	No	Yes	23.0377	0	11.901	14	6	2	3	3	5	6	6	Q9CW46;A0A1L1SRY4	Q9CW46;A0A1L1SRY4	Ribonucleoprotein PTB-binding 1
Commd6	4.72049	4.58285	0	9.92569	10.0199	10.5014	14.856	14.5541	15.1983	Yes	Yes	23.9437	0	10.228	4	2	0	1	0	2	2	2	B7ZNP3;Q3V4B5	B7ZNP3;Q3V4B5	COMM domain-containing protein 6
Nup98	4.7172	2.28795	0.000140921	9.81857	12.7471	9.67222	15.5556	14.9819	15.852	No	Yes	21.0672	0	6.4924	8	4	1	3	1	4	2	3	A0A1B0GSX7;Q6PFD9;A0A1B0GRB5;A0A1B0GRA7;B2RQL0;A0A140T8J8;A0A1B0GS62	A0A1B0GSX7;Q6PFD9;A0A1B0GRB5;A0A1B0GRA7;B2RQL0;A0A140T8J8	Nuclear pore complex protein Nup98-Nup96;Nuclear pore complex protein Nup98;Nuclear pore complex protein Nup96
Ahcyl1	4.71584	3.02789	0.000175659	9.85697	7.75935	9.12749	13.6602	13.2714	13.9597	Yes	Yes	21.0104	0	7.7109	5	2	1	0	0	2	2	2	Q80SW1;F7ATQ6;D3Z2Q0	Q80SW1	Putative adenosylhomocysteinase 2
Mrpl24	4.71201	2.31037	0.000117712	10.1879	10.5867	7.56399	14.4011	13.4347	14.6389	Yes	Yes	22.3532	0	9.2903	6	2	0	2	0	2	2	2	Q9CQ06;A0A0A6YXP0	Q9CQ06;A0A0A6YXP0	39S ribosomal protein L24, mitochondrial
Pou2f2;Pou2f3;Pou2f1	4.70995	2.87539	0.000143443	10.779	11.7574	9.56866	14.8029	15.5495	15.8825	No	Yes	23.298	0	12.767	7	4	3	3	1	3	4	4	H3BKB7;Q00196;Q3U5D1;H3BJT4;A0A0A0MQM6;I1E4X2;A0A0A0MQE0;E9Q6Z8;F8VQL7;A0A0R4J1Z4;P31362;P25425	H3BKB7;Q00196;Q3U5D1;H3BJT4;A0A0A0MQM6;I1E4X2;A0A0A0MQE0;E9Q6Z8;F8VQL7;A0A0R4J1Z4;P31362;P25425	POU domain protein;POU domain, class 2, transcription factor 2;POU domain, class 2, transcription factor 3;POU domain, class 2, transcription factor 1
Xdh	4.7099	3.63941	0.000215633	13.0502	12.782	11.6792	17.5167	17.1127	17.0116	No	Yes	23.1521	0	41.675	18	8	5	5	3	8	7	7	Q00519;A0A3B2WBF8	Q00519	Xanthine dehydrogenase/oxidase;Xanthine dehydrogenase;Xanthine oxidase
Ckap5	4.70849	3.3989	0.000276134	12.0401	11.9524	10.602	16.1728	15.8934	16.6537	No	Yes	21.4072	0	12.78	19	8	3	4	2	8	7	8	Z4YL78;A0A0R4J0K2;K3W4R5;A2AGT5	Z4YL78;A0A0R4J0K2;K3W4R5;A2AGT5	Cytoskeleton-associated protein 5
Trim25	4.70797	3.42975	0.000289256	11.2659	12.7067	11.454	16.8407	16.0781	16.6317	No	Yes	22.5909	0	9.275	10	5	1	4	2	5	5	5	Q61510;Q5SU71;Q5SU72	Q61510;Q5SU71;Q5SU72	E3 ubiquitin/ISG15 ligase TRIM25
	4.70518	2.5746	0.000103474	11.701	10.8304	10.0357	14.3296	15.5728	16.7802	No	Yes	23.0113	0	4.1053	5	1	1	1	1	1	1	1	A0A140T8P3	A0A140T8P3
Chchd4	4.70348	1.96187	0.000299276	10.8356	12.8279	8.43411	15.4002	15.0159	15.7919	Yes	Yes	25.19	0	2.2974	4	1	0	1	0	1	1	1	Q8VEA4	Q8VEA4	Mitochondrial intermembrane space import and assembly protein 40
Mtor	4.70153	3.88663	0.000291971	10.3063	10.0787	9.21888	14.594	14.2158	14.8988	No	Yes	19.6291	0	3.5899	6	3	2	1	1	3	3	3	Q9JLN9	Q9JLN9	Serine/threonine-protein kinase mTOR
Abi1	4.69723	4.17411	0	12.2629	13.2937	12.7084	17.4644	17.2218	17.6705	No	Yes	24.41	0	31.832	14	6	2	3	3	5	5	6	B7ZCU2;B7ZCU5;B7ZCU4;B7ZCU3;B7ZCU0;J3QNK8;Q8CBW3;A0A087WR90;A0A087WNT3;A0A087WRS3;A0A087WPP8;Q6AXH6;Q6AXD2;P62484	B7ZCU2;B7ZCU5;B7ZCU4;B7ZCU3;B7ZCU0;J3QNK8;Q8CBW3	Abl interactor 1
Pnpt1	4.69676	3.84613	0.000274914	11.721	11.817	11.0592	15.8366	16	16.8509	No	Yes	21.8653	0	5.3022	10	5	2	1	1	5	5	5	Q8K1R3	Q8K1R3	Polyribonucleotide nucleotidyltransferase 1, mitochondrial
Pea15;Pea15a	4.69564	2.36765	8.19193e-05	8.92926	12.0825	10.9739	15.7208	14.7289	15.623	No	Yes	24.5602	0	3.749	6	3	1	2	2	2	2	2	Q62048;D3Z375	Q62048;D3Z375	Astrocytic phosphoprotein PEA-15
Sar1b	4.68833	2.16452	0.000151124	13.0208	9.92308	12.8655	15.7435	16.7355	17.3955	No	Yes	24.3848	0	12.569	15	3	1	2	1	3	3	3	Q9CQC9	Q9CQC9	GTP-binding protein SAR1b
Rbm26	4.68633	3.04007	0.000175	10.8133	9.25502	11.192	14.7159	15.0763	15.5272	No	Yes	22.0702	0	5.7379	8	5	2	1	4	3	5	4	E9PUF4;E9Q640;E9PYZ7;Q6NZN0;A0A0R4J214	E9PUF4;E9Q640;E9PYZ7;Q6NZN0;A0A0R4J214	RNA-binding protein 26
Abcf1	4.68447	4.25522	0	13.5349	13.9249	13.3656	17.8378	18.7437	18.2973	No	Yes	24.6908	0	99.693	36	14	5	5	5	10	13	11	Q6P542	Q6P542	ATP-binding cassette sub-family F member 1
Dgat1	4.68357	2.20552	0.000155435	8.14639	11.2843	8.69545	15.0387	13.5655	13.5727	Yes	Yes	22.1449	0	14.581	1	1	0	1	0	1	1	1	Q9Z2A7	Q9Z2A7	Diacylglycerol O-acyltransferase 1
Chi3l1	4.68332	1.57074	0.000660144	14.1563	10.3918	NaN	17.8449	16.4609	16.5661	No	Yes	24.6398	0	49.226	13	5	1	2	0	5	5	5	Q61362;D3Z2Z5;D3YXU4	Q61362	Chitinase-3-like protein 1
Dtd2	4.67726	3.6911	0.00022409	9.4947	10.2515	9.21867	14.2742	13.8441	14.8784	No	Yes	22.317	0	7.3231	3	3	1	1	1	3	3	3	Q8BHA3	Q8BHA3	Probable D-tyrosyl-tRNA(Tyr) deacylase 2
	4.67515	3.28813	0.000238908	15.6493	14.2678	14.2278	18.8504	19.5027	19.8172	No	Yes	28.3748	0	8.3497	9	5	2	1	1	2	5	3	A0A338P7E3;A0A338P711;C0HKG6;C0HKG5	A0A338P7E3;A0A338P711;C0HKG6;C0HKG5
	4.67333	3.9037	0.000285714	9.26979	9.20735	8.14521	13.7541	13.4238	13.4644	Yes	Yes	24.0223	0	3.0532	1	1	0	0	0	1	1	1	P01668;P01666;P01665;P01664;A0A140T8Q4;A0A140T8Q0	P01668;P01666;P01665;P01664;A0A140T8Q4;A0A140T8Q0	Ig kappa chain V-III region PC 7210;Ig kappa chain V-III region PC 7183;Ig kappa chain V-III region PC 7043;Ig kappa chain V-III region CBPC 101
Clcc1	4.66915	2.71973	0.000116959	NaN	9.65003	8.52338	13.4538	13.46	14.3538	No	Yes	21.1395	0.001374	1.7733	1	2	0	1	1	1	2	2	A2AEM2;Q99LI2	A2AEM2;Q99LI2	Chloride channel CLIC-like protein 1
Nfkb2	4.666	3.03129	0.000170109	11.8805	12.419	10.6634	15.9826	15.9171	17.0612	No	Yes	22.3103	0	37.586	16	7	2	4	1	5	7	7	A0A494BAQ2;A0A494B9Y5;Q9WTK5	A0A494BAQ2;A0A494B9Y5;Q9WTK5	Nuclear factor NF-kappa-B p100 subunit;Nuclear factor NF-kappa-B p52 subunit
Ccl21a;Ccl21c;Ccl21b	4.66176	2.57777	0.000101744	10.7712	7.99564	10.0795	14.1651	14.1113	14.5552	Yes	Yes	23.286	0	2.4519	4	2	1	0	0	2	2	2	P84444;P86793;P86792	P84444;P86793;P86792	C-C motif chemokine 21a;C-C motif chemokine 21c;C-C motif chemokine 21b
Hdgfrp2	4.66092	4.00727	0.000318725	12.5	13.3623	12.6078	17.0242	17.6842	17.7445	No	Yes	23.9623	0	18.155	15	7	3	5	3	7	7	7	Q3UMU9	Q3UMU9	Hepatoma-derived growth factor-related protein 2
Wbp11	4.65917	3.63613	0.000205128	11.9674	12.8961	11.5753	17.1616	16.4442	16.8105	No	Yes	23.7568	0	5.1797	12	5	2	4	2	5	5	4	Q923D5;A0A0N4SWF7;A0A0N4SVL7	Q923D5;A0A0N4SWF7	WW domain-binding protein 11
Gmip	4.6551	3.23765	0.00021978	9.63919	11.299	10.062	15.0592	14.5073	15.3989	No	Yes	21.5972	0	37.586	7	3	1	3	2	3	3	3	Q6PGG2	Q6PGG2	GEM-interacting protein
Ppil2	4.65445	3.91058	0.000276817	12.7385	12.3571	11.8322	17.4175	16.4848	16.9888	No	Yes	24.0763	0	3.7024	3	3	3	3	2	2	3	3	Q9D787;A0A338P6J5;A0A338P6S7	Q9D787;A0A338P6J5;A0A338P6S7	Peptidyl-prolyl cis-trans isomerase-like 2
Smchd1	4.65429	3.19534	0.000205882	12.0283	13.4485	11.6046	16.8332	16.9098	17.3013	No	Yes	21.5284	0	15.132	22	12	3	9	3	11	12	11	Q6P5D8;A0A3B2WD81;A0A3B2W494	Q6P5D8	Structural maintenance of chromosomes flexible hinge domain-containing protein 1
Mgll	4.651	3.92339	0.000284698	7.78637	8.28261	7.48911	11.9258	12.7098	12.8754	Yes	Yes	20.429	0.0072483	1.2523	3	1	0	0	0	1	1	1	D3YYS6;E9Q3B9;O35678	D3YYS6;E9Q3B9;O35678	Monoglyceride lipase
Mpeg1	4.65069	5.22108	0	16.6708	16.955	16.3699	21.3367	21.226	21.385	No	Yes	28.4576	0	70.123	62	12	7	10	7	11	12	11	E9QN37;A1L314	E9QN37;A1L314	Macrophage-expressed gene 1 protein
Slc27a4	4.64804	1.7509	0.000433855	9.90119	8.52719	6.62477	13.4594	12.5387	NaN	Yes	Yes	19.298	0.0087561	1.2149	0	1	0	0	0	1	1	0	Q91VE0	Q91VE0	Long-chain fatty acid transport protein 4
Rock2	4.63838	2.81922	0.000129991	12.5067	13.2618	11.331	16.4497	16.658	17.9069	No	Yes	22.3009	0	37.869	21	11	2	5	1	6	10	11	F8VPK5;A0A1Y7VMN0;P70336;A0A3Q4L2X0	F8VPK5;A0A1Y7VMN0;P70336	Rho-associated protein kinase;Rho-associated protein kinase 2
Prg3	4.63521	2.78241	0.000125112	10.2171	10.5114	9.57912	13.7964	14.3439	16.073	No	Yes	23.9802	0.00056689	2.0141	3	1	1	1	1	1	1	1	Q9JL95	Q9JL95	Proteoglycan 3
Utp23	4.63039	3.27545	0.000225443	11.3336	11.1806	9.78039	15.2482	15.0871	15.8506	No	Yes	23.4654	0	3.4319	3	3	2	2	1	2	2	3	Q9CX11;G3XA22;G3X989;E0CYI7	Q9CX11;G3XA22	rRNA-processing protein UTP23 homolog
Ociad1	4.62851	1.62266	0.000621488	12.5332	13.4189	8.25229	16.474	15.2762	16.3398	No	Yes	23.544	0	8.3275	9	6	3	4	1	4	4	5	Q9CRD0;A0A0J9YUB6;A0A0J9YUK7;A0A0J9YTV7	Q9CRD0;A0A0J9YUB6	OCIA domain-containing protein 1
Srp19	4.62659	3.8791	0.000264026	11.9899	10.9642	11.9108	16.339	15.8806	16.5251	No	Yes	25.3455	0	13.043	7	4	3	1	3	4	4	4	Q9D104;G5E8T3;Q9D7A6	Q9D104;G5E8T3;Q9D7A6	Signal recognition particle 19 kDa protein
Mycbp	4.62583	2.70283	0.000114379	10.4518	13.0951	11.7688	16.2469	16.2734	16.6728	No	Yes	24.3698	0	16.199	9	3	1	2	2	3	3	3	Q9EQS3;A2A7K5	Q9EQS3;A2A7K5	C-Myc-binding protein
Drap1	4.62327	4.20692	0.000365297	12.7834	12.6531	11.9141	16.8243	17.0251	17.371	No	Yes	26.2018	0	6.0506	14	3	3	3	2	3	3	3	F6T9K1;D3YY09;Q9D6N5;D3YYC2;G3UXH5	F6T9K1;D3YY09;Q9D6N5;D3YYC2;G3UXH5	Dr1-associated corepressor
Vrk1	4.62264	4.60986	0	13.7173	14.042	13.3724	18.4083	18.0333	18.558	No	Yes	25.3418	0	35.963	23	7	3	4	3	6	7	7	Q80X41;A0A1Y7VMH3;A0A1Y7VLL5	Q80X41;A0A1Y7VMH3	Serine/threonine-protein kinase VRK1
Surf6	4.6215	3.47591	0.000282258	12.7042	13.0472	11.5772	17.3857	16.7246	17.0829	No	Yes	24.8974	0	10.904	14	6	4	4	3	6	6	6	P70279;A2ALA0	P70279;A2ALA0	Surfeit locus protein 6
Tbc1d2b	4.62128	3.24654	0.000215385	12.1874	10.7008	12.2214	16.0013	16.185	16.7871	No	Yes	22.6615	0	11.687	12	5	3	1	4	4	5	5	Q3U0J8	Q3U0J8	TBC1 domain family member 2B
Agap3	4.62104	3.07771	0.000160735	NaN	9.36418	9.08797	13.9289	13.2567	14.3558	No	Yes	21.8597	0.0089767	1.1916	2	1	0	1	1	1	1	1	A0A0G2JER6;F8VQE9;Q8VHH5	A0A0G2JER6;F8VQE9;Q8VHH5	Arf-GAP with GTPase, ANK repeat and PH domain-containing protein 3
Rbm42	4.6202	5.37262	0	8.90404	9.24339	8.88287	13.7189	13.4139	13.7581	Yes	Yes	21.686	0	15.648	2	2	0	1	0	2	1	1	D3YYW8;Q91V81	D3YYW8;Q91V81	RNA-binding protein 42
Nit2	4.61808	3.58279	0.000324826	11.4469	12.5891	11.3796	16.3451	16.0754	16.8493	No	Yes	24.533	0	16.352	7	4	2	2	1	4	4	4	Q9JHW2;A0A338P6G0;A0A338P7A1	Q9JHW2;A0A338P6G0	Omega-amidase NIT2
Ada	4.61662	4.49118	0	15.5607	15.347	15.0837	19.9182	19.5687	20.3544	No	Yes	26.8548	0	58.712	47	12	8	9	6	12	12	12	P03958	P03958	Adenosine deaminase
Atg3	4.61213	2.32888	0.000141999	11.5059	13.499	10.3483	16.9637	15.7663	16.4596	No	Yes	25.0434	0	6.9528	7	3	2	3	2	3	2	3	Q9CPX6	Q9CPX6	Ubiquitin-like-conjugating enzyme ATG3
Eif2b2	4.61009	2.86556	0.000135266	7.48877	7.87321	9.15189	12.3796	12.2187	13.7458	Yes	Yes	21.0762	0	4.3445	1	1	0	0	0	1	1	1	D3Z487;Q99LD9	D3Z487;Q99LD9	Translation initiation factor eIF-2B subunit beta
Prps1l1	4.61004	4.46095	0	13.6113	13.7186	13.2189	18.054	17.7805	18.5443	No	Yes	23.8042	0	9.4739	9	1	1	1	1	1	1	1	Q8C5R8	Q8C5R8
Rbbp6	4.60961	5.73343	0	9.96474	9.84986	9.87193	14.7128	14.2826	14.52	No	Yes	16.9297	0	3.9549	4	3	1	1	1	2	3	2	A0A338P6W1;P97868	A0A338P6W1;P97868	E3 ubiquitin-protein ligase RBBP6
Tbcb	4.60698	2.74362	0.000118644	11.5957	11.8401	9.48445	15.5266	15.7483	15.4663	No	Yes	22.67	0	4.6301	8	5	2	2	1	4	3	4	Q9D1E6	Q9D1E6	Tubulin-folding cofactor B
Klhdc4	4.60576	2.45489	8.64198e-05	7.53772	9.17185	10.3415	12.9944	14.3542	13.5198	Yes	Yes	21.2802	0.0042519	1.4621	3	1	0	0	0	1	1	1	G3UZG5;G3UZ63;G3X961;Q921I2	G3UZG5;G3UZ63;G3X961;Q921I2	Kelch domain-containing protein 4
Igkv1-110;Igkv1-35;Igkv1-99;Igkv1-115	4.60369	5.51538	0	13.1214	13.3393	12.9716	17.9403	17.6999	17.603	No	Yes	27.3421	0	38.128	11	2	1	1	1	2	2	2	P01631;A0A140T8M9;A0A140T8M0;A0A0B4J1I0;A0A075B5N0;A0A075B5K8;F6XWB2;A0A140T8N1;A0A0G2JDE5	P01631;A0A140T8M9;A0A140T8M0;A0A0B4J1I0;A0A075B5N0;A0A075B5K8;F6XWB2;A0A140T8N1;A0A0G2JDE5	Ig kappa chain V-II region 26-10
Tspan31	4.6032	3.68513	0.000205656	10.8315	10.6944	10.1664	14.6329	14.9819	15.8871	No	Yes	24.3655	0	4.9763	3	1	1	1	1	1	1	1	Q9CQ88	Q9CQ88	Tetraspanin-31
Sec24c	4.60299	3.50742	0.000289855	12.8883	12.9979	11.6731	17.0635	16.7968	17.5079	No	Yes	23.6152	0	23.85	15	6	3	4	2	6	6	6	A0A286YDI8;G3X972;A0A286YD08;A0A2I3BQS4	A0A286YDI8;G3X972
Cryl1	4.6022	3.66898	0.000201005	11.313	12.3508	11.2397	16.2831	15.8075	16.6195	No	Yes	24.2466	0	3.4604	12	4	1	2	1	4	4	3	Q99KP3	Q99KP3	Lambda-crystallin homolog
Themis2	4.60153	3.87037	0.000252366	12.8163	12.4983	11.6922	16.7152	16.7976	17.2987	No	Yes	22.3711	0	45.741	18	5	2	2	2	5	4	4	Q91YX0	Q91YX0	Protein THEMIS2
Mrpl37	4.60138	3.20293	0.000200286	9.1531	7.93851	9.51766	13.4152	12.9715	14.0267	Yes	Yes	20.6715	0	3.4192	2	1	0	0	1	1	1	1	Q921S7	Q921S7	39S ribosomal protein L37, mitochondrial
Bank1	4.60126	3.00666	0.000155902	11.1957	12.9031	11.0167	16.4707	15.8781	16.5705	No	Yes	20.2526	0	36.047	8	5	1	3	1	5	3	3	Q80VH0;B0F3S4;A0A0G2JF26	Q80VH0;B0F3S4;A0A0G2JF26	B-cell scaffold protein with ankyrin repeats
Nt5c	4.60074	2.68442	0.000111554	13.0821	14.2237	11.6337	17.5725	17.209	17.9602	No	Yes	22.7854	0	29.912	9	2	1	1	1	2	2	2	A2A9X5;Q9JM14	A2A9X5;Q9JM14	5(3)-deoxyribonucleotidase, cytosolic type
Pik3ap1	4.59691	4.46655	0	8.16403	8.99293	8.47725	13.2718	12.9079	13.2452	Yes	Yes	19.685	0	8.0629	3	2	0	1	0	2	2	1	Q9EQ32	Q9EQ32	Phosphoinositide 3-kinase adapter protein 1
Ints5	4.59651	4.09251	0.000326531	12.5168	12.9329	12.9307	17.9093	16.8563	17.4044	No	Yes	26.8919	0	19.904	12	4	2	3	3	4	4	4	Q9D937;A0A087WRC2;A0A087WQJ5	Q9D937;A0A087WRC2	Uncharacterized protein C11orf98 homolog
Ndufab1	4.58838	3.41703	0.00022187	10.2289	10.1841	NaN	14.3945	14.733	15.2572	No	Yes	24.618	0	6.1503	3	1	1	1	0	1	1	1	F6ZFT1;F8WJ64;Q9CR21	F6ZFT1;F8WJ64;Q9CR21	Acyl carrier protein;Acyl carrier protein, mitochondrial
Jtb	4.58772	3.82948	0.000238806	10.1791	9.71336	9.04317	14.0628	13.9917	14.6443	Yes	Yes	24.0074	0	4.2705	1	1	0	1	0	1	1	1	D3Z4D1;O88824	D3Z4D1;O88824	Protein JTB
Ncf4	4.58603	3.83137	0.00024024	13.6252	14.0727	13.9592	19.182	17.9737	18.2595	No	Yes	26.1678	0	58.438	43	13	6	7	5	13	13	12	P97369;A8XU21	P97369;A8XU21	Neutrophil cytosol factor 4
6430548M08Rik;Kiaa0513	4.57602	2.5534	9.45946e-05	8.59932	11.0963	10.9105	15.0707	14.2657	14.9978	Yes	Yes	22.526	0	7.6611	4	2	0	1	0	2	2	2	Q3TA40;Q8R0A7;D3YUS2;Q8BQB5	Q3TA40;Q8R0A7;D3YUS2;Q8BQB5	Uncharacterized protein KIAA0513
Selh;2700094K13Rik	4.5757	3.63058	0.000327869	12.7951	12.5197	12.0702	17.0867	16.3524	17.6729	No	Yes	23.0157	0	37.257	12	4	3	3	2	4	4	4	Q3UQA7;A0A087WNU1;A0A087WPM0	Q3UQA7;A0A087WNU1;A0A087WPM0	Selenoprotein H
Adprh	4.57557	2.77339	0.000121845	9.70495	11.1395	11.3465	16.3385	14.6614	14.9178	No	Yes	23.1638	0	6.7021	7	5	1	1	1	4	2	2	P54923	P54923	[Protein ADP-ribosylarginine] hydrolase
Rad23a	4.57401	4.56588	0	10.1877	10.3989	10.5737	15.1694	14.5089	15.204	No	Yes	23.2371	0	10.409	7	2	1	1	1	2	2	2	Q8CAP3;P54726;Q3TN85;F6YL88	Q8CAP3;P54726;Q3TN85	UV excision repair protein RAD23 homolog A
Sp3	4.56983	2.08459	0.000210252	NaN	11.8089	9.45091	14.7769	15.1766	15.6458	No	Yes	22.4793	0	18.695	7	3	0	3	1	2	3	3	O70494	O70494	Transcription factor Sp3
Vps25	4.56946	2.38386	0.000120798	12.8213	10.4603	13.4257	16.7781	16.3793	17.2583	No	Yes	25.437	0	4.0205	11	2	2	1	2	2	2	2	A8XY17;A2A4J8;Q9CQ80	A8XY17;A2A4J8;Q9CQ80	Vacuolar protein-sorting-associated protein 25
Smpd4	4.56918	2.68874	0.000108359	NaN	8.24303	8.63068	12.9924	12.2703	13.7554	No	Yes	25.1551	0	12.93	3	1	0	1	1	1	1	1	A0A338P6E2;A0A338P715;A0A338P6P4;A0A338P7A7;A0A338P6I0;A0A338P6B0;A0A338P6U9;A0A338P7L1;A0A338P6S3;A0A338P695;Q6ZPR5	A0A338P6E2;A0A338P715;A0A338P6P4;A0A338P7A7;A0A338P6I0;A0A338P6B0;A0A338P6U9;A0A338P7L1;A0A338P6S3;A0A338P695;Q6ZPR5	Sphingomyelin phosphodiesterase 4
Arhgap18	4.56821	2.84979	0.000125561	NaN	10.5124	11.2323	15.0845	15.1375	16.0996	No	Yes	22.2373	0	9.2452	5	3	0	1	2	3	3	3	Q8K0Q5	Q8K0Q5	Rho GTPase-activating protein 18
Rassf4	4.56805	2.25755	0.000158714	12.6759	9.71068	9.65846	14.8743	15.2365	15.6384	No	Yes	23.0979	0	10.672	5	2	2	1	2	2	2	2	Q8CB96;A0A0N4SVF1	Q8CB96	Ras association domain-containing protein 4
Snx20	4.56428	2.75269	0.00011745	8.50134	10.3072	7.92501	13.1095	13.7244	13.5925	Yes	Yes	21.5318	0	3.5457	4	3	0	0	0	2	2	1	A0A0R4J0D0;Q9D2Y5	A0A0R4J0D0;Q9D2Y5	Sorting nexin-20
Kdelc2	4.56302	2.10533	0.000211077	11.0037	9.0369	7.2527	13.8265	13.031	14.1249	Yes	Yes	22.9649	0	3.0346	3	1	1	0	0	1	1	1	A0A1L1SRB2;G5E897	A0A1L1SRB2;G5E897
Plp2	4.56137	4.24048	0.000350877	13.9791	14.1664	13.7185	18.9009	17.9837	18.6635	No	Yes	28.2768	0	6.0871	5	1	1	1	1	1	1	1	Q9R1Q7	Q9R1Q7	Proteolipid protein 2
Xpo5	4.56115	2.78689	0.000118143	NaN	11.0996	9.74631	14.9161	14.8158	15.2204	No	Yes	20.8947	0	7.013	4	3	0	2	1	3	3	3	Q924C1	Q924C1	Exportin-5
Gtf2f1	4.55838	3.39617	0.0002118	NaN	9.34366	9.29332	14.2392	14.0024	13.3891	No	Yes	21.4457	0	20.828	4	2	0	1	1	2	2	2	Q3THK3	Q3THK3	General transcription factor IIF subunit 1
Prkar2a	4.55824	2.09778	0.000212467	9.87901	11.9538	NaN	14.801	15.4648	16.1581	No	Yes	23.3803	0	29.289	12	5	1	2	0	5	5	5	A0A0A6YY28;A0A0A6YX73;Q8K1M3;P12367;H3BK84	A0A0A6YY28;A0A0A6YX73;Q8K1M3;P12367	cAMP-dependent protein kinase type II-alpha regulatory subunit
Ptpn23	4.55428	2.90401	0.000136187	9.03111	10.6707	9.3817	14.1992	13.4903	15.0568	Yes	Yes	20.2221	0	2.5508	4	2	0	0	0	2	1	2	Q6PB44	Q6PB44	Tyrosine-protein phosphatase non-receptor type 23
Epdr1	4.55035	3.22922	0.0001983	12.7734	13.9332	12.5159	16.9685	17.8087	18.0965	No	Yes	26.5241	0	11.183	13	5	3	5	3	5	5	5	Q99M71;A0A1Y7VKS9	Q99M71	Mammalian ependymin-related protein 1
Tpt1	4.54791	3.9083	0.000246914	15.7308	15.9592	14.8503	19.937	19.8946	20.3523	No	Yes	28.4027	0	29.994	25	5	4	3	4	5	5	4	P63028;D3YU75	P63028;D3YU75	Translationally-controlled tumor protein
Scoc	4.54724	2.78279	0.000120898	9.15405	9.47398	7.93582	14.3528	13.416	12.4367	Yes	Yes	23.2947	0	2.972	3	1	0	0	0	1	1	1	Q78YZ6	Q78YZ6	Short coiled-coil protein
Ssb	4.54426	4.35114	0	15.7844	16.0875	15.4711	19.9135	20.3908	20.6714	No	Yes	27.87	0	61.37	75	16	9	11	8	16	16	16	P32067;A2AR07;D6RI87;F6SXM5	P32067;A2AR07	Lupus La protein homolog
Rap1gds1	4.54256	4.43128	0	13.4835	13.6844	13.3156	17.9701	17.6432	18.4979	No	Yes	24.9182	0	20.465	20	11	5	7	5	10	11	10	E9Q912;A0A0G2JGC8;A0A0G2JF70	E9Q912;A0A0G2JGC8
Pdia4	4.54231	4.04162	0.000286738	19.0265	19.5136	18.6516	23.7645	23.151	23.9031	No	Yes	30.1625	0	323.31	196	42	26	33	22	38	41	42	A0A0R4J0Z1;P08003	A0A0R4J0Z1;P08003	Protein disulfide-isomerase A4
Rpl26	4.54195	3.82329	0.000227273	16.1898	16.3587	15.2954	20.1948	20.3994	20.8755	No	Yes	30.016	0	8.5159	26	7	5	5	5	6	7	7	B1ARA3;P61255;B1ARA5	B1ARA3;P61255;B1ARA5	60S ribosomal protein L26
Nop9	4.53841	1.66591	0.000495623	8.30258	11.8257	NaN	14.8836	14.1667	14.7573	No	Yes	21.8049	0	19.022	6	5	1	4	0	3	4	3	Q8BMC4	Q8BMC4	Nucleolar protein 9
Rbm27	4.53795	3.599	0.000306346	11.1557	11.4762	10.0409	15.2952	15.5479	15.4435	No	Yes	22.017	0	10.638	10	5	3	3	1	3	4	5	Q5SFM8	Q5SFM8	RNA-binding protein 27
Gngt2	4.53732	2.77367	0.000118044	11.0683	12.2969	9.97755	15.2954	15.4472	16.2121	No	Yes	25.2298	0	30.962	8	3	1	1	1	3	3	3	Q61017	Q61017	Guanine nucleotide-binding protein G(I)/G(S)/G(O) subunit gamma-T2
Tbca	4.53586	4.4045	0	14.4192	14.4271	13.8586	18.6838	18.476	19.1527	No	Yes	27.9094	0	13.937	17	6	3	3	2	5	5	6	A0A1Y7VJ48;P48428	A0A1Y7VJ48;P48428	Tubulin-specific chaperone A
Serpina1d	4.53541	4.62717	0	14.7853	14.1665	14.302	18.7469	18.8644	19.2487	No	Yes	26.5419	0	10.485	18	6	6	5	5	6	6	6	Q00897	Q00897	Alpha-1-antitrypsin 1-4
Cars	4.53456	4.42305	0	11.2969	11.7944	12.0445	16.0592	16.1159	16.5645	No	Yes	22.452	0	7.1948	6	4	2	2	3	4	4	4	Q9ER72	Q9ER72	Cysteine--tRNA ligase, cytoplasmic
Usp7	4.53262	3.56113	0.00028866	12.9382	12.1057	11.724	16.8593	16.2843	17.2222	No	Yes	22.5819	0	14.512	12	5	4	2	3	3	4	5	F8VPX1;E9PXY8;Q6A4J8;G3UWR8	F8VPX1;E9PXY8;Q6A4J8	Ubiquitin carboxyl-terminal hydrolase;Ubiquitin carboxyl-terminal hydrolase 7
Nsdhl	4.53261	3.43805	0.000253623	11.0301	11.6273	10.1266	15.261	15.2368	15.884	No	Yes	22.9443	0	7.1298	7	4	1	2	1	3	4	4	Q9R1J0	Q9R1J0	Sterol-4-alpha-carboxylate 3-dehydrogenase, decarboxylating
G3bp1	4.53028	4.56672	0	14.7903	14.7639	14.1675	18.9526	18.9662	19.3938	No	Yes	25.9376	0	68.314	41	11	6	7	5	10	10	10	P97855	P97855	Ras GTPase-activating protein-binding protein 1
Tmem245	4.5292	2.69262	0.000108527	7.65703	10.0742	9.69866	13.6948	13.4182	13.9044	Yes	Yes	21.0527	0.0047493	1.4099	4	1	0	1	0	1	1	1	D3YWD3;B1AZA5	D3YWD3;B1AZA5	Transmembrane protein 245
Hmga1	4.52823	2.67547	0.000106626	14.4814	12.25	14.2361	18.7697	17.7056	18.0769	No	Yes	27.3347	0	34.822	8	5	2	2	3	5	5	5	P17095;Q3TE85;A0A338P6F6;A0A338P6E8	P17095;Q3TE85;A0A338P6F6;A0A338P6E8	High mobility group protein HMG-I/HMG-Y
Gtf2f2	4.52771	4.2186	0.000338983	11.8725	12.8326	12.6925	17.0047	16.8821	17.0939	No	Yes	24.1049	0	9.5713	14	6	2	3	3	5	6	5	Q8R0A0	Q8R0A0	General transcription factor IIF subunit 2
Rac1;Rac3	4.52647	3.60594	0.000304348	14.9813	15.6431	14.269	19.3183	19.292	19.8626	No	Yes	28.4247	0	16.068	20	3	2	2	2	3	3	3	Q3TLP8;P63001;P60764;A2AC13	Q3TLP8;P63001;P60764	Ras-related C3 botulinum toxin substrate 1;Ras-related C3 botulinum toxin substrate 3
Nipsnap1	4.5249	2.70878	0.000110585	11.2476	12.7679	10.2817	15.9945	15.5633	16.314	No	Yes	24.2549	0.00028596	2.09	3	1	1	1	1	1	1	1	O55125	O55125	Protein NipSnap homolog 1
Fam76b	4.52485	3.70727	0.000338164	9.99433	11.2635	10.4053	15.2092	14.7342	15.2943	No	Yes	22.8452	0	6.1652	6	2	1	2	2	2	2	2	Q80XP8;A0A1L1SQS5;D6RG49	Q80XP8;A0A1L1SQS5;D6RG49	Protein FAM76B
Sh3glb2	4.52418	4.07944	0.000297398	11.9165	12.4801	11.629	16.3757	16.26	16.9625	No	Yes	23.6444	0	11.268	13	6	2	3	2	5	6	6	Q8R3V5;A2AWI9;A2AWI7	Q8R3V5;A2AWI9;A2AWI7	Endophilin-B2
Krr1	4.52289	5.03938	0	9.20521	8.99589	9.53946	13.7566	13.5963	13.9563	Yes	Yes	21.7614	0	3.4062	4	2	0	0	1	2	2	2	G3UZA0;Q8BGA5	G3UZA0;Q8BGA5	KRR1 small subunit processome component homolog
Mrps15	4.52197	4.80405	0	10.1869	10.5732	10.0324	14.7406	14.5594	15.0584	No	Yes	22.7992	0.0013759	1.7821	4	1	1	1	1	1	1	1	Q9DC71	Q9DC71	28S ribosomal protein S15, mitochondrial
Sco1	4.52032	2.9001	0.000127971	11.4175	11.8191	11.1929	NaN	15.4384	16.5553	No	Yes	22.5518	0	7.247	5	2	1	1	1	1	2	2	Q5SUD5;Q5SUC9	Q5SUD5;Q5SUC9	Protein SCO1 homolog, mitochondrial
Utp18	4.5187	2.74692	0.000114099	10.0927	11.3455	8.84249	14.5596	14.3934	14.8838	Yes	Yes	21.8985	0.00028835	2.1601	4	2	0	2	0	2	2	2	Q5SSI6	Q5SSI6	U3 small nucleolar RNA-associated protein 18 homolog
Luc7l2	4.51792	4.37979	0	15.9575	16.5991	15.9477	20.4125	20.6338	21.0118	No	Yes	28.2501	0	65.921	43	14	10	10	9	14	13	12	Q7TNC4;Q05CX5;E9Q715	Q7TNC4;Q05CX5;E9Q715	Putative RNA-binding protein Luc7-like 2
Igkv17-127;Igkv17-121	4.51693	2.83875	0.000124666	11.6178	11.2566	10.4764	14.5437	15.7105	16.6474	No	Yes	26.9987	0.00028645	2.0983	3	1	1	1	1	1	1	1	A0A075B5J9;A0A075B5K3;A0A0G2JFA8;A0A0G2JDN5	A0A075B5J9;A0A075B5K3;A0A0G2JFA8;A0A0G2JDN5
Lrrc25	4.5145	2.48656	8.59951e-05	13.5653	14.1077	11.4067	17.3915	17.1638	18.0678	No	Yes	23.0725	0	27.732	15	4	3	3	2	4	4	4	Q8K1T1	Q8K1T1	Leucine-rich repeat-containing protein 25
Cpsf6	4.51249	3.95829	0.000251572	14.9192	15.4133	14.6436	19.4057	20.0211	19.0867	No	Yes	26.8948	0	44.194	33	10	5	8	5	9	9	7	H3BJ30;H3BJW3;Q6NVF9;H3BKW0;H3BLM9	H3BJ30;H3BJW3;Q6NVF9;H3BKW0	Cleavage and polyadenylation specificity factor subunit 6
Gtf2e1	4.51173	2.79257	0.000116183	NaN	10.7115	9.44653	14.2505	14.7733	14.7484	No	Yes	22.3521	0	13.275	4	2	0	2	1	2	2	2	Q9D0D5	Q9D0D5	General transcription factor IIE subunit 1
Crebbp;Ep300	4.50906	2.61889	9.81079e-05	9.51719	8.27632	8.02423	13.0642	NaN	13.1658	Yes	Yes	19.1806	0.0011139	1.8704	2	1	0	0	0	1	0	1	A0A0U1RPL2;A0A0U1RQB6;F8VPR5;B2RWS6;P45481	A0A0U1RPL2;A0A0U1RQB6;F8VPR5;B2RWS6;P45481	Histone acetyltransferase p300;CREB-binding protein
Slmap	4.50663	1.38741	0.000934029	11.9106	7.32559	8.7734	NaN	13.7452	13.9412	Yes	Yes	20.0909	0.0037323	1.4986	0	2	1	0	0	0	2	1	F8WIH0;D3Z7V3;H7BX64;Q3URD3;F6WY34;F6UV57;F6YCM8	F8WIH0;D3Z7V3;H7BX64;Q3URD3;F6WY34;F6UV57;F6YCM8	Sarcolemmal membrane-associated protein
Ptprj	4.50656	3.95516	0.000248447	13.0164	13.3703	12.9109	17.1265	17.4609	18.2299	No	Yes	23.4583	0	19.419	22	9	4	5	5	7	8	9	A2AWF8;A2AWF9;E9Q4S7;Q64455	A2AWF8;A2AWF9;E9Q4S7;Q64455	Protein-tyrosine-phosphatase;Receptor-type tyrosine-protein phosphatase eta
Ggh	4.50495	2.88283	0.000125224	11.572	12.5925	NaN	16.1604	16.6455	16.9557	No	Yes	23.0389	0	10.731	4	3	1	2	0	3	3	3	Q9Z0L8	Q9Z0L8	Gamma-glutamyl hydrolase
Lrrc57	4.50486	2.30603	0.000162635	8.3319	11.2301	8.81146	14.4968	13.2204	14.1708	Yes	Yes	22.3667	0	4.3126	4	3	0	1	0	3	2	2	A2AKH7;Q8JZX5;Q9D1G5	A2AKH7;Q8JZX5;Q9D1G5	Leucine-rich repeat-containing protein 57
Tmem9b	4.50398	2.70143	0.000106464	9.23439	9.98608	9.20919	NaN	13.3755	14.5855	Yes	Yes	23.057	0.001113	1.8667	1	1	0	0	0	0	1	1	D3YU78;Q9JJR8	D3YU78;Q9JJR8	Transmembrane protein 9B
Hnrnpl	4.50148	3.75136	0.0002	16.4397	16.9395	15.8123	20.6732	20.6614	21.3614	No	Yes	28.1952	0	145.82	64	18	9	13	9	17	16	17	G5E924;Q8R081;G3UY38;G3UY56	G5E924;Q8R081;G3UY38	Heterogeneous nuclear ribonucleoprotein L
Rrp1b	4.50099	2.92209	0.000135135	9.73504	10.6094	8.84885	14.8633	14.392	13.441	Yes	Yes	21.1145	0.0016398	1.7208	2	2	0	0	0	2	2	1	Q91YK2	Q91YK2	Ribosomal RNA processing protein 1 homolog B
Srrt	4.49988	4.84738	0	15.0121	15.3847	15.0931	19.5149	19.4575	20.0172	No	Yes	26.0444	0	56.219	55	17	7	11	8	16	17	17	Q99MR6;A0A0G2JDF8;A0A0G2JDN3;A0A0G2JDF1;A0A0G2JG65;A0A0G2JE73;A0A1Y7VNN4	Q99MR6;A0A0G2JDF8	Serrate RNA effector molecule homolog
Commd10	4.49852	2.12693	0.000212002	9.19465	11.968	8.37166	14.3792	14.0579	14.5928	Yes	Yes	23.6423	0	9.6802	2	2	0	2	0	2	2	2	A0A3Q4EGT0;A0A3Q4EII3;A0A3Q4EC50;A0A3Q4EHW7;Q3UTM6;Q8JZY2;A0A3Q4EHG2	A0A3Q4EGT0;A0A3Q4EII3;A0A3Q4EC50;A0A3Q4EHW7;Q3UTM6;Q8JZY2;A0A3Q4EHG2	COMM domain-containing protein 10
Exoc7	4.498	3.53474	0.000270793	9.78676	9.41432	9.46416	13.3378	13.9697	14.8517	Yes	Yes	20.6131	0	4.3502	3	2	0	1	0	2	2	2	A2AAN3;A2AAN0;O35250;A2AAN4	A2AAN3;A2AAN0;O35250;A2AAN4	Exocyst complex component 7
Padi2	4.49568	2.70463	0.000108025	11.2685	11.6334	9.30937	15.0552	14.9839	15.6592	No	Yes	22.4529	0	4.5953	7	3	2	2	1	3	3	3	Q08642	Q08642	Protein-arginine deiminase type-2
Vps13c	4.49509	2.78226	0.000116861	9.99912	10.305	11.6906	14.2716	15.2334	15.975	No	Yes	19.1063	0	5.7497	5	3	1	1	3	2	3	3	Q8BX70	Q8BX70	Vacuolar protein sorting-associated protein 13C
Cwc27	4.49309	1.8379	0.000398256	8.17914	10.4668	7.57398	13.3189	13.1473	NaN	Yes	Yes	20.5132	0.0016393	1.7196	2	1	0	0	0	1	1	1	Q3TKY6	Q3TKY6	Peptidyl-prolyl cis-trans isomerase CWC27 homolog
Sumo3	4.49282	1.56998	0.000694301	9.52901	NaN	8.55006	11.4344	14.0599	15.1027	No	Yes	24.711	0	2.6732	2	1	1	0	1	1	1	1	G3UZ60;G3UWI9;G3UWX9;Q9Z172	G3UZ60;G3UWI9;G3UWX9;Q9Z172	Small ubiquitin-related modifier 3
Txndc5	4.49131	4.57179	0	16.7867	16.7504	16.4063	20.9634	20.8872	21.5668	No	Yes	28.0222	0	102.86	64	10	8	8	8	10	9	9	A0A0R4J1Y7;E9PXX7;Q91W90	A0A0R4J1Y7;E9PXX7;Q91W90	Thioredoxin domain-containing protein 5
Siae	4.49114	2.07222	0.000226036	10.4416	11.7749	8.00193	14.0835	14.558	15.0505	Yes	Yes	22.04	0	4.2782	3	1	0	1	0	1	1	1	A0A1N9M4K1;A0A1L1SU77;P70665	A0A1N9M4K1;A0A1L1SU77;P70665	Sialate O-acetylesterase;Sialate O-acetylesterase small subunit;Sialate O-acetylesterase large subunit
Nelfb	4.49055	4.35954	0.00036036	11.6982	11.902	11.5792	16.4606	15.6919	16.4986	No	Yes	23.0916	0	16.703	10	4	2	2	2	4	4	4	A0A5H1ZRL3;Q8C4Y3	A0A5H1ZRL3;Q8C4Y3	Negative elongation factor B
Golph3	4.48819	3.39019	0.000231023	8.35539	9.69259	9.10505	13.1079	13.3758	14.1339	Yes	Yes	22.3549	0	3.175	3	1	0	0	0	1	1	1	Q05BZ0;Q9CRA5	Q05BZ0;Q9CRA5	Golgi phosphoprotein 3
Cul1	4.48818	2.92536	0.000128558	10.9066	10.8638	NaN	14.848	15.2079	16.0642	No	Yes	22.2	0.0064834	1.2617	5	2	1	1	0	2	2	2	Q3TPM3;Q9WTX6	Q3TPM3;Q9WTX6	Cullin-1
Strip1;Strip2	4.48674	2.8154	0.000121317	9.30174	11.0443	8.80641	14.1489	13.9318	14.532	No	Yes	20.9933	0	3.7384	3	2	1	2	1	2	2	2	Q8C079;E9QN41;Q8C9H6	Q8C079;E9QN41;Q8C9H6	Striatin-interacting protein 1;Striatin-interacting proteins 2
Eef1a2	4.48599	3.78541	0.000203562	9.18249	9.41225	8.38893	13.9553	13.2305	13.2558	Yes	Yes	21.151	0.0034871	1.554	4	1	0	0	0	1	1	1	P62631	P62631	Elongation factor 1-alpha 2
Rac2	4.48393	4.13367	0.000298507	18.1323	18.6107	17.698	22.6886	22.2976	22.9065	No	Yes	31.4396	0	21.484	42	7	6	6	6	7	7	7	Q05144;A0A2R8VHH0	Q05144;A0A2R8VHH0	Ras-related C3 botulinum toxin substrate 2
Napg	4.4836	4.26352	0.000334728	14.0136	14.1322	13.626	18.1485	18.1625	18.9117	No	Yes	25.5273	0	29.905	26	8	4	4	4	8	8	8	D3Z4B2;Q9CWZ7;A0A494BA20;A0A494BAE3;A0A494BBF5;A0A494BA49;A0A494BAX2	D3Z4B2;Q9CWZ7;A0A494BA20;A0A494BAE3	Gamma-soluble NSF attachment protein
Stfa1;BC100530;BC117090;Gm5416;Stfa3	4.48326	1.54903	0.000725402	8.91065	10.5996	8.25232	15.314	NaN	12.1609	Yes	Yes	22.8392	0	2.7364	2	2	0	0	0	2	0	1	A0A384DV91;P35175;D6REU3;L7N257;Q6IE28;Q497J0;P35173	A0A384DV91;P35175;D6REU3;L7N257;Q6IE28;Q497J0;P35173	Stefin-1;Stefin-3
Trappc12	4.48312	2.41248	0.000121005	9.2138	9.3054	8.37638	14.2369	12.6597	NaN	Yes	Yes	20.5784	0	4.9307	2	1	0	1	0	1	1	1	Q8C0C3;Q8K2L8	Q8C0C3;Q8K2L8	Trafficking protein particle complex subunit 12
Tsnax	4.48225	2.63416	9.95025e-05	11.2766	9.2862	10.1478	14.6841	13.815	15.6583	Yes	Yes	22.4723	0	11.099	9	4	1	0	1	3	2	3	Q9QZE7;A0A1D5RLR0	Q9QZE7;A0A1D5RLR0	Translin-associated protein X
Sec13	4.47993	3.62054	0.000294118	11.5143	12.0312	10.8529	16.1174	15.4318	16.2889	No	Yes	22.4082	0	49.817	6	2	1	2	1	2	2	2	Q9D1M0	Q9D1M0	Protein SEC13 homolog
Tra2a	4.47807	1.88554	0.00038309	NaN	13.7093	10.8465	16.4378	16.8211	17.009	No	Yes	24.9862	0	14.551	15	7	0	4	1	5	7	6	A0A0N4SVC2;E9QP00;Q6PFR5;A0A0N4SV13	A0A0N4SVC2;E9QP00;Q6PFR5	Transformer-2 protein homolog alpha
Mug1;Mug2	4.47678	3.19692	0.000180879	11.402	12.8174	12.5793	16.0761	17.1839	16.969	No	Yes	22.9345	0	25.877	7	3	1	2	2	3	3	3	P28665;P28666;A0A0N4SVU1	P28665;P28666	Murinoglobulin-1;Murinoglobulin-2
Mcmbp	4.4766	2.19873	0.000148846	8.40602	9.99368	NaN	14.4231	12.8519	13.7543	No	Yes	20.8851	0.0045057	1.445	2	1	1	1	0	1	1	1	H9KV04;Q8R3C0	H9KV04;Q8R3C0	Mini-chromosome maintenance complex-binding protein
Park7	4.47547	4.87523	0	16.1803	16.0121	15.8766	20.4624	20.1949	20.8381	No	Yes	28.0181	0	65.232	52	9	6	7	7	9	9	9	A2A813;Q99LX0;A2A815;A2A817;A2A816	A2A813;Q99LX0;A2A815	Protein deglycase DJ-1
Pitpnm1	4.47471	3.47978	0.000212766	9.73863	9.98536	NaN	14.2065	14.0337	14.7699	No	Yes	20.5831	0.00029172	2.2623	1	2	1	1	0	2	2	2	O35954;D3YXW5	O35954;D3YXW5	Membrane-associated phosphatidylinositol transfer protein 1
Whsc1l1	4.47393	3.43528	0.000203193	9.06372	9.27404	9.53582	NaN	14.1103	13.42	Yes	Yes	20.8513	0	2.6261	2	1	0	0	0	0	1	1	A0A1B0GSG3;D3Z197;D3Z357;Q6P2L6	A0A1B0GSG3;D3Z197;D3Z357;Q6P2L6	Histone-lysine N-methyltransferase;Histone-lysine N-methyltransferase NSD3
Sigmar1	4.47254	1.82402	0.000420144	7.2752	11.7801	8.71481	13.3847	13.5343	14.2687	Yes	Yes	23.2628	0.0019032	1.6812	1	1	0	0	0	1	1	1	O55242	O55242	Sigma non-opioid intracellular receptor 1
Rpl36	4.46675	3.66811	0.000311111	14.2778	14.8434	13.589	18.4148	18.5949	19.1007	No	Yes	29.2039	0	8.3539	14	3	2	2	2	3	3	3	Q6ZWZ4;P47964	Q6ZWZ4	60S ribosomal protein L36
	4.46387	2.15528	0.00016	9.91884	10.7864	10.3402	13.7191	13.827	16.8909	Yes	Yes	25.1674	0	15.572	2	1	0	0	0	1	1	1	A0A2I3BRW0;A0A2I3BQG3	A0A2I3BRW0;A0A2I3BQG3
Igkv10-95	4.46343	2.11669	0.000210435	9.9021	11.7539	NaN	15.4196	14.4806	15.9741	No	Yes	24.5563	0	21.839	3	2	1	1	0	2	2	2	P01645;P01644;A0A075B5L0;A0A140T8M1;P01646;P01647;P01643	P01645;P01644;A0A075B5L0;A0A140T8M1;P01646;P01647;P01643	Ig kappa chain V-V region HP 93G7;Ig kappa chain V-V region HP R16.7;Ig kappa chain V-V region HP 123E6;Ig kappa chain V-V region HP 124E1;Ig kappa chain V-V region MOPC 173
Frg1	4.45772	4.60706	0	13.1201	13.3803	12.7526	17.3674	17.4048	17.8539	No	Yes	25.9021	0	27.269	15	8	3	2	3	7	7	7	P97376	P97376	Protein FRG1
Irf3	4.45655	4.54061	0	11.3045	11.4072	11.0726	15.9079	15.2623	15.9837	No	Yes	23.2205	0	17.903	5	2	1	1	1	2	2	2	P70671;A0A140LHE6;A0A140LJE8	P70671;A0A140LHE6;A0A140LJE8	Interferon regulatory factor 3
Aacs	4.45535	2.96433	0.000136452	8.74437	7.63676	6.61049	11.9171	12.0214	12.4192	Yes	Yes	19.1748	0.0019048	1.6871	3	1	0	1	0	1	1	1	Q9D2R0	Q9D2R0	Acetoacetyl-CoA synthetase
Cetn2	4.45504	4.82604	0	12.1565	12.6643	12.8232	16.9341	16.9428	17.1322	No	Yes	25.4835	0	10.826	13	5	1	4	2	4	5	3	B1AUQ7;Z4YJH1;Q9R1K9;E9PVN5;A0A0A0MQN3;Q8K4K1;P41209	B1AUQ7;Z4YJH1;Q9R1K9	Centrin-2
	4.45493	4.40235	0.000355556	14.7114	13.9644	14.0775	18.707	18.4671	18.9441	No	Yes	24.9757	0	55.434	35	13	7	7	6	13	12	12	P0DOV2	P0DOV2
Sh3glb1	4.45421	3.34744	0.000212121	14.5734	16.067	14.6009	19.388	19.4938	19.722	No	Yes	27.5025	0	79.222	41	12	4	11	6	12	12	12	A0A0G2JEC4;Q9JK48;A0A0G2JE45;A0A0G2JF57	A0A0G2JEC4;Q9JK48	Endophilin-B1
Prelp	4.45363	2.32457	0.0001639	10.5422	NaN	8.88824	13.6026	14.1646	14.7393	No	Yes	21.773	0	2.6461	4	2	1	0	1	1	2	2	Q9JK53	Q9JK53	Prolargin
Ctsc	4.45305	3.10464	0.00015891	16.1461	17.4315	15.6519	20.4131	20.94	21.2356	No	Yes	28.4392	0	152.31	50	8	4	5	3	5	8	8	P97821;D3Z220	P97821	Dipeptidyl peptidase 1;Dipeptidyl peptidase 1 exclusion domain chain;Dipeptidyl peptidase 1 heavy chain;Dipeptidyl peptidase 1 light chain
Becn1	4.45119	2.28792	0.000158794	NaN	10.6756	8.8156	14.1049	13.799	14.6865	No	Yes	23.5008	0	2.8474	2	1	0	1	1	1	1	1	F7CVL9;E9PYD6;O88597	F7CVL9;E9PYD6;O88597	Beclin-1
Serpina1a;Serpina1c	4.45114	2.91187	0.00012939	12.0841	13.0976	10.9436	16.902	16.2666	16.31	No	Yes	23.2801	0	5.4317	6	3	3	3	3	3	3	3	A0A0R4J0X5;A0A0A0MQA3;Q00896;P07758	A0A0R4J0X5;A0A0A0MQA3;Q00896;P07758	Alpha-1-antitrypsin 1-3;Alpha-1-antitrypsin 1-1
Urod	4.45046	4.07114	0.000329412	NaN	11.2432	11.3933	15.644	15.613	16.049	No	Yes	22.8976	0	11.688	11	6	0	2	1	6	5	5	P70697;A0A0A0MQG7	P70697;A0A0A0MQG7	Uroporphyrinogen decarboxylase
Grk6	4.45032	3.47746	0.000246479	13.1082	12.2465	11.9918	16.5584	16.6011	17.5379	No	Yes	23.6563	0	15.627	15	7	4	4	3	5	5	7	A0A286YE10;A0A286YDZ5;Q9EP84;A0A286YDA5;O70293;O70291;Q8VEB1	A0A286YE10;A0A286YDZ5;Q9EP84;A0A286YDA5;O70293	G protein-coupled receptor kinase 6
Hmmr	4.44819	2.09638	0.000203875	10.3404	9.60474	8.16425	14.165	15.1869	12.102	Yes	Yes	20.9588	0.00056721	2.0169	1	2	0	0	0	1	2	1	Q00547	Q00547	Hyaluronan mediated motility receptor
Taf8	4.44759	4.00695	0.00031746	NaN	10.1565	9.83091	14.4024	14.2514	14.6701	No	Yes	22.7244	0	9.355	3	1	0	1	1	1	1	1	Q9EQH4	Q9EQH4	Transcription initiation factor TFIID subunit 8
Qars	4.44683	4.85742	0	13.4651	13.5169	13.4931	17.7549	17.71	18.3506	No	Yes	23.5866	0	49.714	25	8	5	5	5	8	8	8	D3Z158;Q8BML9;A0A0A6YY08;A0A140LJH1;A0A140LIN2;A0A140LHJ3;A0A140LHB3;A0A140LIS6;A0A140LHZ5;A0A140LIR0;A0A140LJH2;A0A140LID3;A0A140LHC3;A0A140LII8;A0A140LJK5	D3Z158;Q8BML9;A0A0A6YY08
Epn1	4.44676	4.08204	0.000268456	11.5643	11.342	12.0867	16.2754	15.6407	16.4172	No	Yes	23.8285	0	36.971	9	4	1	2	2	4	4	4	Q80VP1;D3Z550;D3Z4V3;Q91W69	Q80VP1	Epsin-1
	4.44645	2.13703	0.000174603	10.2475	NaN	10.638	13.6198	15.8737	15.1739	No	Yes	24.59	0	4.2069	2	1	1	0	1	1	1	1	A0A140T8M2;P01636	A0A140T8M2;P01636	Ig kappa chain V-V region MOPC 149
Vps18	4.44473	3.49699	0.000250447	11.1199	12.365	12.1156	16.2223	15.9177	16.7947	No	Yes	22.3268	0	8.8638	10	5	1	2	3	5	5	5	Q8R307	Q8R307	Vacuolar protein sorting-associated protein 18 homolog
Polr2h	4.44074	1.8389	0.000421204	12.2416	8.18377	12.0046	15.3176	14.8562	15.5784	No	Yes	24.3503	0	8.2513	3	2	1	1	1	2	2	2	A0A338P6B4;A0A338P6I2;Q923G2	A0A338P6B4;A0A338P6I2;Q923G2	DNA-directed RNA polymerases I, II, and III subunit RPABC3
Sin3b	4.43754	2.62274	9.59561e-05	11.678	9.70144	9.18785	14.3668	14.5171	14.996	Yes	Yes	20.7942	0.0069984	1.2581	4	2	0	0	0	1	1	2	Q62141	Q62141	Paired amphipathic helix protein Sin3b
Tcerg1	4.43448	3.88488	0.000213333	14.6779	14.4549	13.7306	18.2873	18.838	19.0416	No	Yes	24.8467	0	23.107	35	12	7	6	5	10	11	10	Q8CGF7;A0A494B9W7;A0A494BAT6	Q8CGF7	Transcription elongation regulator 1
Creg1	4.43417	2.09057	0.000226225	9.72575	11.8748	8.04281	14.2483	14.4415	14.256	Yes	Yes	23.8721	0.00029011	2.1935	3	1	0	1	0	1	1	1	K4DI63	K4DI63
Cnot3	4.43388	2.53363	8.70647e-05	8.20233	8.96259	10.56	12.8538	13.7704	14.4023	Yes	Yes	23.1035	0	5.2082	5	2	0	0	0	1	2	2	F6YBV1;Q8K0V4	F6YBV1;Q8K0V4	CCR4-NOT transcription complex subunit 3
Efr3a	4.43386	2.89923	0.000126582	10.9567	8.87582	9.57187	14.0021	13.9851	14.7187	Yes	Yes	20.6612	0.0034927	1.5636	2	2	0	0	0	2	2	2	Q8BG67;A0A1D5RLL3;Q8BWC5	Q8BG67;A0A1D5RLL3;Q8BWC5	Protein EFR3 homolog A
Cpne2	4.43347	2.68073	0.000102339	10.1206	9.14867	7.62907	13.7702	13.0605	13.3681	Yes	Yes	20.9381	0	3.0323	2	1	0	1	0	1	1	1	A0A0R4J1D0;P59108	A0A0R4J1D0;P59108	Copine-2
Sel1l	4.42996	4.56215	0	12.218	11.8286	11.6521	16.2706	16.0535	16.6644	No	Yes	22.4973	0	21.877	7	3	2	2	2	3	3	3	J3QJX3;Q9Z2G6	J3QJX3;Q9Z2G6	Protein sel-1 homolog 1
Psat1	4.42992	6.11036	0	11.0927	11.0173	10.9274	15.5521	15.2687	15.5063	No	Yes	23.2126	0	3.0984	6	2	1	1	1	2	2	2	Q99K85;Q3U6K9;E9Q6P1	Q99K85;Q3U6K9;E9Q6P1	Phosphoserine aminotransferase
Bre	4.42882	2.81687	0.000113914	11.5887	10.5012	NaN	15.5218	15.057	15.8423	No	Yes	23.3922	0	8.1022	8	4	2	1	0	4	4	4	D3Z7P0;Q8K3W0;E9Q8Q1;A0A0J9YV56;E9Q0U3	D3Z7P0;Q8K3W0;E9Q8Q1;A0A0J9YV56;E9Q0U3	BRCA1-A complex subunit BRE
Uqcrb	4.42717	3.52153	0.000253165	14.3619	15.4905	14.7047	19.1236	18.8514	19.8636	No	Yes	27.8737	0	27.888	23	5	2	2	2	5	5	5	Q9CQB4;Q9D855	Q9CQB4;Q9D855	Cytochrome b-c1 complex subunit 7
Upf1	4.42595	2.21901	0.000147182	13.122	13.1433	13.1579	16.4683	19.5956	16.6371	No	Yes	21.6461	0	29.206	11	7	3	4	4	6	6	6	Q9EPU0	Q9EPU0	Regulator of nonsense transcripts 1
Slc12a7	4.42574	3.65885	0.00029106	8.90972	9.25735	9.94015	13.4937	13.5278	14.3629	Yes	Yes	20.4175	0	12.594	3	2	0	0	0	2	2	2	Q9WVL3	Q9WVL3	Solute carrier family 12 member 7
Specc1	4.42341	3.77102	0.000328638	9.71783	8.95295	9.0748	13.2013	13.5647	14.2499	No	Yes	20.4925	0.0019017	1.6653	2	1	1	1	1	1	1	1	A0A0J9YV86;A0A0J9YUF8;A0A0J9YUR2;A0A0J9YTU3;Q5SXY1	A0A0J9YV86;A0A0J9YUF8;A0A0J9YUR2;A0A0J9YTU3;Q5SXY1	Cytospin-B
Soat1	4.41837	3.62743	0.000275591	11.8243	11.8598	11.0243	15.668	15.6628	16.6326	No	Yes	23.689	0	13.716	6	2	1	2	2	2	2	2	Q61263;A0A087WNN8;A0A087WSJ5	Q61263;A0A087WNN8;A0A087WSJ5	Sterol O-acyltransferase 1
Pde12	4.41784	1.95878	0.000336134	10.0801	10.8945	10.0511	17.0641	13.1486	14.0665	No	Yes	22.9234	0	2.629	4	2	1	1	1	2	1	1	Q3TIU4	Q3TIU4	2,5-phosphodiesterase 12
Ifih1	4.41778	3.1953	0.000172626	12.0732	10.5176	10.6517	15.1497	15.4226	15.9236	No	Yes	21.872	0	19.222	10	4	3	1	2	3	4	4	Q8R5F7	Q8R5F7	Interferon-induced helicase C domain-containing protein 1
Eif3k	4.41755	3.14349	0.000162225	12.4819	13.4161	11.537	16.895	16.6272	17.1655	No	Yes	25.5391	0	10.546	9	3	2	2	1	3	3	3	Q9DBZ5;A0A140LJ59;Q3TY56	Q9DBZ5;A0A140LJ59	Eukaryotic translation initiation factor 3 subunit K
Tmcc2	4.41397	2.05735	0.000269919	8.92494	9.90841	10.772	12.3462	15.6688	14.8323	Yes	Yes	22.1117	0	4.1295	5	3	0	1	0	2	3	2	Q3T9T1;A0A5F8MQA9;Q3TZY4;Q80W04;A0A0N4SWB9;F8WJ98;Q69ZZ6	Q3T9T1;A0A5F8MQA9;Q3TZY4;Q80W04	Transmembrane and coiled-coil domains protein 2
Gtf2b	4.41199	4.13828	0.000273038	12.2346	12.3775	12.6718	16.2716	17.1427	17.1056	No	Yes	24.7211	0	14.258	15	7	3	4	5	5	7	7	P62915	P62915	Transcription initiation factor IIB
Nploc4	4.4114	3.22797	0.000178344	10.5859	12.2988	10.9227	15.7344	15.4686	15.8387	No	Yes	22.7116	0	17.415	10	6	1	3	1	5	5	6	P60670	P60670	Nuclear protein localization protein 4 homolog
Ddx47	4.40868	4.18547	0.000277778	12.3838	11.7888	12.4238	16.1739	16.9177	16.7309	No	Yes	24.6628	0	15.629	15	6	2	2	3	5	6	5	F6QKD2;A0A0N4SVT1;Q9CWX9;A0A0N4SWC5;A0A0N4SVK2	F6QKD2;A0A0N4SVT1;Q9CWX9;A0A0N4SWC5	Probable ATP-dependent RNA helicase DDX47
Defcr20;Defa20	4.40662	2.15793	0.000212747	10.0922	9.5634	7.8208	12.0454	13.8937	14.7572	Yes	Yes	25.0568	0.0082623	1.2271	2	1	0	0	0	1	1	1	Q8C1N9;Q45VN2	Q8C1N9;Q45VN2	Alpha-defensin 20
Ppp1r14b	4.40648	2.60311	9.15033e-05	8.41171	9.12736	7.54486	NaN	12.7571	12.7785	Yes	Yes	21.5935	0	8.7799	1	1	0	0	0	0	1	1	A0A494B9R1;Q62084	A0A494B9R1;Q62084	Protein phosphatase 1 regulatory subunit 14B
Kbtbd11	4.40543	2.95832	0.00013308	9.79584	9.1229	10.1129	13.9629	13.181	15.1041	Yes	Yes	18.7735	0	5.0841	2	4	1	0	0	2	2	4	Q8BNW9	Q8BNW9	Kelch repeat and BTB domain-containing protein 11
Asap1	4.40429	4.06766	0.000247678	10.0699	10.4184	9.51246	14.321	14.1264	14.7663	No	Yes	19.4881	0	10.539	8	3	2	2	2	3	3	3	H3BKD4;H3BKE6;E9QMI7;E9QMJ1;H3BL41;H3BJY2;E9QN63;Q9QWY8;H3BJM7	H3BKD4;H3BKE6;E9QMI7;E9QMJ1;H3BL41;H3BJY2;E9QN63;Q9QWY8	Arf-GAP with SH3 domain, ANK repeat and PH domain-containing protein 1
Nifk	4.40426	2.64711	9.58248e-05	NaN	11.2091	9.74378	14.9021	14.6516	15.0885	No	Yes	22.7982	0	7.0626	4	2	0	1	1	2	2	2	Q91VE6;E0CXU3	Q91VE6;E0CXU3	MKI67 FHA domain-interacting nucleolar phosphoprotein
Faf2	4.39821	2.14336	0.000209162	11.864	12.8952	9.47877	16.2027	15.1677	16.0622	No	Yes	22.831	0	13.616	8	3	2	2	1	3	3	3	Q3TDN2;D6RE51;D3YUP4;D3Z2H4	Q3TDN2	FAS-associated factor 2
Dok3	4.39716	2.76665	0.000109804	9.14061	11.2917	11.0949	15.0278	14.564	15.1269	No	Yes	22.4795	0	12.893	5	4	1	2	2	4	4	4	Q9QZK7	Q9QZK7	Docking protein 3
Rcn3	4.39344	2.07046	0.000271131	11.1121	12.0915	8.64083	15.1272	14.1983	15.6993	No	Yes	22.8256	0	6.0268	9	3	2	2	1	3	2	2	A0A1B0GR19;A0A1B0GR86;Q8BH97;A0A1B0GS22;A0A1B0GSK5;A0A1B0GRI0	A0A1B0GR19;A0A1B0GR86;Q8BH97;A0A1B0GS22;A0A1B0GSK5	Reticulocalbin-3
Sorl1	4.39199	3.67912	0.000286885	10.9084	9.97657	10.8155	15.0179	14.4485	15.4101	No	Yes	19.9682	0	4.9314	6	4	3	1	3	4	3	3	O88307	O88307	Sortilin-related receptor
Hsdl1	4.39053	3.4945	0.000236887	9.13534	10.2789	9.56444	14.2985	13.4373	14.4145	Yes	Yes	22.2053	0.0082666	1.2302	3	1	0	0	0	1	1	1	A0A1D5RLG0;Q8BTX9	A0A1D5RLG0;Q8BTX9	Inactive hydroxysteroid dehydrogenase-like protein 1
Gmppa	4.3905	3.34432	0.000198864	12.58	12.7215	11.2094	16.5526	16.3576	16.7722	No	Yes	24.2534	0	10.525	12	6	3	3	2	6	6	5	Q922H4;D3Z3L0;D3Z3M0;D3Z2L8;D3YVK2;D3Z5Z5;D3Z0T7	Q922H4	Mannose-1-phosphate guanyltransferase alpha
Slc28a2;Slc28a1;Gm14085	4.38884	2.05873	0.000301581	8.64336	11.445	9.00334	15.4707	13.2243	13.5632	Yes	Yes	22.1367	0	3.5606	2	2	0	2	0	2	2	1	O88627;E9PXX9;A2AWR5	O88627;E9PXX9;A2AWR5	Sodium/nucleoside cotransporter 2;Sodium/nucleoside cotransporter
Srbd1	4.38768	2.84789	0.000117845	8.67138	10.4183	8.59427	13.1726	13.4595	14.2148	No	Yes	20.0414	0	2.9816	1	2	1	2	1	1	2	2	F8WGW3;Q497V5;B7ZWI7;B7ZWI4;Q8CHZ0	F8WGW3;Q497V5;B7ZWI7;B7ZWI4;Q8CHZ0	S1 RNA-binding domain-containing protein 1
Col6a4	4.3867	3.2999	0.000190736	9.17105	9.65723	10.6882	14.2138	13.8078	14.655	No	Yes	19.4437	0	4.2973	2	2	1	1	2	2	2	2	A2AX52	A2AX52	Collagen alpha-4(VI) chain
Gdpd1	4.38347	3.13971	0.000145833	NaN	11.019	10.4739	15.1874	14.6658	15.5366	No	Yes	23.0518	0	5.7436	7	4	0	1	1	3	4	3	Q9CRY7	Q9CRY7	Glycerophosphodiester phosphodiesterase domain-containing protein 1
Ebna1bp2	4.38331	3.99886	0.000231214	11.7468	11.6099	10.8824	15.9921	15.39	16.0069	No	Yes	24.1834	0	7.5069	11	5	3	2	2	4	3	4	A2ACZ1;Q9D903	A2ACZ1;Q9D903	Probable rRNA-processing protein EBP2
Akap13	4.38251	3.68358	0.000285132	10.8113	11.9513	11.9964	15.9321	15.7862	16.1882	No	Yes	20.3721	0	9.6283	7	9	2	3	4	8	7	6	E9Q394;A0A140LJJ5;A0A140LIX0;A0A140LID7;A0A140LHG3	E9Q394;A0A140LJJ5
Mrto4	4.37996	5.93826	0	12.174	12.4728	12.4628	16.8442	16.7186	16.6865	No	Yes	24.2452	0	13.393	12	5	2	2	2	5	5	5	Q9D0I8;A2AMV1;D6RCI7	Q9D0I8;A2AMV1	mRNA turnover protein 4 homolog
Gda	4.37937	2.96069	0.000130597	13.9566	15.5002	13.4753	18.9308	18.4649	18.6745	No	Yes	25.7435	0	128.15	42	13	5	7	3	12	12	12	Q9R111;D3YU09;A0A494B982	Q9R111;D3YU09;A0A494B982	Guanine deaminase
Mcee	4.3791	2.47398	8.10185e-05	8.89837	11.3878	9.32401	14.3363	13.585	14.8262	No	Yes	23.0655	0	25.244	5	2	1	2	1	2	2	2	Q9D1I5	Q9D1I5	Methylmalonyl-CoA epimerase, mitochondrial
Gdi1	4.37835	2.49974	8.29876e-05	13.9016	15.6283	13.0182	18.3436	18.1271	19.2124	No	Yes	25.5652	0	92.118	34	12	4	8	3	12	11	12	P50396;D6RI86;B7FAU8	P50396	Rab GDP dissociation inhibitor alpha
Rab31	4.37687	4.1589	0.000266667	10.6414	10.3237	10.6244	15.4154	14.4183	14.8864	No	Yes	23.2971	0	2.2808	4	1	1	1	1	1	1	1	Q3TXV4;Q921E2	Q3TXV4;Q921E2	Ras-related protein Rab-31
Fam111a	4.37543	4.56967	0.000373832	9.0399	8.83055	8.23698	13.0606	13.098	13.0752	Yes	Yes	20.573	0	3.3813	2	1	0	0	0	1	1	1	D3YYD2;Q9D2L9	D3YYD2;Q9D2L9	Protein FAM111A
Ltbp3	4.37437	2.59086	8.98012e-05	9.47559	9.24165	7.14427	13.0917	12.4956	13.3973	Yes	Yes	19.0379	0.0089744	1.1916	3	1	0	0	0	1	1	1	Q61810	Q61810	Latent-transforming growth factor beta-binding protein 3
Hcfc1	4.37306	2.9921	0.000134357	12.1162	13.9789	12.3335	17.203	16.8754	17.4693	No	Yes	22.8769	0	16.99	17	8	2	7	2	8	7	7	Q61191;B1AUX2;F6SJS2	Q61191;B1AUX2;F6SJS2	Host cell factor 1;HCF N-terminal chain 1;HCF N-terminal chain 2;HCF N-terminal chain 3;HCF N-terminal chain 4;HCF N-terminal chain 5;HCF N-terminal chain 6;HCF C-terminal chain 1;HCF C-terminal chain 2;HCF C-terminal chain 3;HCF C-terminal chain 4;HCF C-terminal chain 5;HCF C-terminal chain 6
Dock10	4.37192	3.54607	0.00024735	13.2728	13.4323	12.1523	17.1518	17.1498	17.6715	No	Yes	22.3666	0	25.305	20	10	5	5	3	9	8	9	A0A087WRP5;A0A087WQ86;E9QM99;Q8BZN6;A0A0R4J2B7;A0A087WS26;Q8BLX9;A0A087WQA1	A0A087WRP5;A0A087WQ86;E9QM99;Q8BZN6;A0A0R4J2B7	Dedicator of cytokinesis protein 10
Pxn	4.37143	2.63634	9.38338e-05	11.8902	10.2917	11.9487	16.7567	14.9199	15.5684	No	Yes	22.111	0	8.1183	10	4	1	1	2	4	4	4	F8VQ28;A0A1D5RMM8;Q8VI36;A0A0J9YV30	F8VQ28;A0A1D5RMM8;Q8VI36;A0A0J9YV30	Paxillin
Mrpl18	4.36865	2.63361	9.33956e-05	10.5808	9.75136	11.0526	15.1528	13.5538	15.7841	Yes	Yes	24.0664	0	6.9823	4	2	0	0	1	2	1	2	Q9CQL5	Q9CQL5	39S ribosomal protein L18, mitochondrial
Mrps5	4.36832	4.16312	0.000263158	11.4631	10.6904	10.8014	15.7203	15.117	15.2224	No	Yes	22.3206	0.0027042	1.6343	6	2	1	1	1	2	2	1	Q99N87	Q99N87	28S ribosomal protein S5, mitochondrial
Atg7	4.36554	4.37617	0.00032	11.5841	12.0049	11.2518	16.1521	15.6648	16.1205	No	Yes	22.6403	0	10.34	12	6	2	3	2	6	6	5	A0A0A0MQN4;Q9D906;S4R2D5;S4R2T5;S4R2P7;S4R1T0;S4R1N8;S4R1U3;S4R1W9	A0A0A0MQN4;Q9D906;S4R2D5;S4R2T5;S4R2P7;S4R1T0	Ubiquitin-like modifier-activating enzyme ATG7
Rfc4	4.36428	3.84484	0.000334928	12.6444	13.6137	13.1089	17.0332	17.5929	17.8338	No	Yes	25.0407	0	52.862	23	13	4	7	6	11	13	13	Q99J62;Q3UI84;D6RGM1	Q99J62;Q3UI84;D6RGM1	Replication factor C subunit 4
Stard5	4.36348	3.51943	0.000237288	12.4286	12.5751	11.5423	16.3437	16.1459	17.1468	No	Yes	25.1045	0	4.674	9	2	1	2	1	2	2	2	Q9EPQ7;D3YU00	Q9EPQ7;D3YU00	StAR-related lipid transfer protein 5
Gsk3b	4.36314	2.63974	9.27767e-05	10.5154	11.4561	NaN	14.9875	15.0181	16.041	No	Yes	22.7501	0	4.8937	4	3	1	2	0	3	3	3	E9QAQ5;Q9WV60	E9QAQ5;Q9WV60	Glycogen synthase kinase-3 beta
Pop1	4.3618	3.388	0.000202899	9.45455	7.99473	8.72751	12.6295	13.2571	13.3757	Yes	Yes	19.6493	0.0037363	1.5082	1	1	0	0	0	1	1	1	Q9D4G5;Q8K205	Q9D4G5;Q8K205
Ccdc93	4.35874	4.27042	0.000288809	12.2073	11.9322	11.8521	16.1483	16.0385	16.881	No	Yes	23.038	0	4.8824	14	5	2	2	2	5	5	5	E9QAD4;Q7TQK5	E9QAD4;Q7TQK5	Coiled-coil domain-containing protein 93
Abi3	4.35697	3.70577	0.000283401	10.2173	10.3468	11.2425	15.1277	14.4991	15.2506	No	Yes	23.006	0	6.6833	3	3	1	1	2	3	2	1	Q8BYZ1;F6RXN4	Q8BYZ1	ABI gene family member 3
Sbno1	4.35403	3.15975	0.000144628	NaN	10.405	9.55316	14.2513	14.1129	14.6352	No	Yes	20.3444	0	6.9801	4	3	0	1	1	3	3	2	F7CVW0;B2RRI2;Q689Z5;Q3TMM7;A0A1W2P6Y8;A0A0G2JGC7;A0A0G2JEM3;A0A1W2P7W8;Q7TNB8	F7CVW0;B2RRI2;Q689Z5	Protein strawberry notch homolog 1
Map3k19	4.35138	5.27566	0	15.0503	15.0262	14.7668	19.2118	19.1297	19.5559	No	Yes	25.4778	0.0082773	1.2422	5	1	1	1	1	1	1	1	A0A087WS76;A0A140LHL6;E9Q3S4	A0A087WS76;A0A140LHL6;E9Q3S4	Mitogen-activated protein kinase kinase kinase 19
Ppih	4.3498	2.73643	0.000103935	11.8093	12.9948	10.5948	16.3836	15.8138	16.2509	No	Yes	24.3173	0	8.553	14	5	3	3	1	5	5	5	A2BGI8;A2BGI9;Q9D868	A2BGI8;A2BGI9	Peptidyl-prolyl cis-trans isomerase
Map4k1	4.34896	4.19427	0.000264901	11.1671	11.9624	12.0831	15.9876	16.0312	16.2407	No	Yes	22.8458	0	30.766	14	4	1	2	3	4	4	4	P70218;A0A140LJF0;Q3UPT4	P70218;A0A140LJF0;Q3UPT4	Mitogen-activated protein kinase kinase kinase kinase 1;Mitogen-activated protein kinase kinase kinase kinase
Alyref;Alyref2	4.34717	2.04319	0.000297838	16.3897	16.6453	13.1934	19.8764	19.3975	19.9961	No	Yes	25.5928	0	34.39	31	6	3	5	3	6	5	6	O08583;G3X9I4;Q9JJW6	O08583;G3X9I4;Q9JJW6	THO complex subunit 4;Aly/REF export factor 2
Bag5	4.34628	2.08924	0.000223325	10.5763	10.6788	10.505	13.7457	NaN	16.1202	No	Yes	21.055	0	5.3976	4	3	1	1	1	2	0	3	Q8CI32;E0CYW3	Q8CI32	BAG family molecular chaperone regulator 5
Ngp	4.34611	3.67974	0.000273438	20.3051	20.7922	19.9042	25.2927	24.4585	24.2887	No	Yes	33.026	0	235.8	137	19	13	15	14	18	19	18	O08692	O08692	Neutrophilic granule protein
Mrps12	4.34499	3.51332	0.000195804	11.5975	10.8639	11.2965	15.699	NaN	15.4962	No	Yes	24.6073	0	2.8647	3	2	1	1	1	2	0	1	E9PUY1;O35680	E9PUY1;O35680	28S ribosomal protein S12, mitochondrial
Erlin1	4.34163	2.7463	0.000104712	10.6054	11.9043	9.5119	15.0266	14.7454	15.2745	No	Yes	22.4099	0	9.8891	5	3	2	2	2	3	3	3	Q91X78	Q91X78	Erlin-1
Rftn1	4.34068	2.84952	0.000115512	12.4869	12.6613	10.9565	16.7345	15.6079	16.7842	No	Yes	23.6018	0	9.1548	11	4	3	3	3	4	3	4	Q6A0D4;D3Z731	Q6A0D4	Raftlin
2210016F16Rik	4.33922	2.4622	0.000119369	13.2248	13.1403	10.7606	16.5783	16.3509	17.2141	No	Yes	23.6217	0	2.7178	10	2	1	1	1	2	2	2	G3X8U3	G3X8U3
Strn	4.3387	2.84588	0.000114473	11.7569	13.2746	11.5768	17.1965	15.8458	16.5822	No	Yes	23.408	0	15.849	11	5	1	3	1	5	3	3	O55106;F8WH41;F6Z700;V9GXT1	O55106;F8WH41;F6Z700	Striatin
Rbm38;Rbm24	4.33836	4.38695	0.000310078	10.3079	9.81893	10.2591	14.0856	14.485	14.8303	Yes	Yes	22.1453	0.00083987	1.9288	2	2	0	1	0	2	2	2	Q62176;D3Z4I3;G3UWX7	Q62176;D3Z4I3;G3UWX7	RNA-binding protein 38;RNA-binding protein 24
Zc3h14	4.33823	2.62906	9.06736e-05	NaN	10.9581	10.4456	15.746	14.3068	15.0674	No	Yes	21.7187	0	3.597	4	3	0	1	1	3	2	2	Q8BJ05;A0A1Y7VJD9;A0A1Y7VK20	Q8BJ05;A0A1Y7VJD9	Zinc finger CCCH domain-containing protein 14
Rmdn1	4.33817	2.41629	0.000140693	8.58179	10.262	NaN	13.9878	13.3669	13.9255	No	Yes	22.2521	0.0057471	1.3137	2	1	1	1	0	1	1	1	A2AGJ2;Q9DCV4	A2AGJ2;Q9DCV4	Regulator of microtubule dynamics protein 1
Hmha1	4.3346	3.69083	0.000272904	14.9494	15.611	14.4113	19.3378	18.9776	19.6601	No	Yes	25.3765	0	98	79	23	11	16	11	23	22	22	G3X9Q3;Q3TBD2;D3Z7R7	G3X9Q3;Q3TBD2;D3Z7R7	Minor histocompatibility protein HA-1
Cox6c	4.33233	3.35447	0.000192308	17.1842	17.3447	16.1556	20.8544	20.9756	21.8515	No	Yes	30.974	0	16.319	36	6	4	5	4	6	6	6	Q9CPQ1;A0A0G2JDA6	Q9CPQ1	Cytochrome c oxidase subunit 6C
Nagk	4.33219	4.07612	0.000234604	13.4529	13.8498	13.1424	17.5815	17.5601	18.3	No	Yes	25.4386	0	22.022	26	8	3	4	3	7	7	7	Q9QZ08;D3YXG2;Q9D997	Q9QZ08;D3YXG2;Q9D997	N-acetyl-D-glucosamine kinase
Capn1	4.33069	4.45463	0.000330579	15.3315	14.9035	14.6952	19.2279	19.0561	19.6382	No	Yes	25.5419	0	41.819	43	15	6	7	6	14	15	14	O35350;A0A494BAC4;A0A494BAS0	O35350	Calpain-1 catalytic subunit
Bzw1	4.32806	4.14863	0.000244648	13.9233	14.1071	13.5116	18.0763	17.8036	18.6463	No	Yes	25.4327	0	26.751	30	8	4	5	2	7	7	7	A0A087WQS2;Q9CQC6;A0A087WPF9;A0A087WS48	A0A087WQS2;Q9CQC6;A0A087WPF9	Basic leucine zipper and W2 domain-containing protein 1
Stk3	4.32767	2.43715	0.000116804	9.97444	8.36993	9.62923	NaN	13.3726	13.9318	Yes	Yes	20.4101	0	2.703	2	1	0	0	0	0	1	1	A0A2I3BQE0;Q9JI10	A0A2I3BQE0;Q9JI10	Serine/threonine-protein kinase 3;Serine/threonine-protein kinase 3 36kDa subunit;Serine/threonine-protein kinase 3 20kDa subunit
Ggct	4.32625	3.34143	0.000188172	9.92636	10.8876	9.48489	14.2449	14.0892	14.9435	No	Yes	23.1011	0.00029138	2.2376	3	1	1	1	1	1	1	1	Q9D7X8	Q9D7X8	Gamma-glutamylcyclotransferase
Coq7	4.32526	3.32187	0.000184697	9.6149	9.14663	8.52919	13.6158	12.6822	13.9685	Yes	Yes	21.4228	0	7.9605	3	1	0	0	0	1	1	1	Q3TYT1;A0A140LIF0;P97478	Q3TYT1;A0A140LIF0;P97478	5-demethoxyubiquinone hydroxylase, mitochondrial
Ints4	4.32243	4.02977	0.000217984	10.1933	10.3672	9.63511	14.4818	13.9335	14.7475	No	Yes	20.5309	0.0011111	1.8552	1	2	1	1	1	2	2	2	Q8CIM8	Q8CIM8	Integrator complex subunit 4
Brd4	4.31972	4.4463	0.000321285	13.7318	14.1907	14.035	17.8902	18.4049	18.6215	No	Yes	23.9085	0	24.227	38	9	4	6	5	8	9	8	Q3UH70;Q9ESU6;B0V2V6;A0A494BAK1;A0A494BBD0;D6RGP2;Q91Y44	Q3UH70;Q9ESU6;B0V2V6;A0A494BAK1	Bromodomain-containing protein 4
Ddx52	4.31707	1.60829	0.000692954	12.0662	8.24965	8.23603	12.0989	14.4815	14.9227	Yes	Yes	21.5446	0	12.728	6	3	2	0	0	1	3	3	Q8K301	Q8K301	Probable ATP-dependent RNA helicase DDX52
Ccny	4.31703	2.93762	0.000123784	7.34502	9.11823	8.88332	12.9179	12.2122	13.1675	Yes	Yes	20.5885	0	4.7094	3	1	1	0	0	1	1	1	Q8BGU5	Q8BGU5	Cyclin-Y
Gadd45gip1	4.31465	4.44169	0.000316206	11.6187	11.974	11.7218	16.0906	15.6805	16.4873	No	Yes	24.6082	0.00028902	2.1733	6	1	1	1	1	1	1	1	Q9CR59	Q9CR59	Growth arrest and DNA damage-inducible proteins-interacting protein 1
Fhl3	4.3144	3.18896	0.000156076	10.2398	8.89302	9.14615	13.9421	13.0748	14.2053	No	Yes	22.0484	0	3.4694	1	1	1	1	1	1	1	1	Q9R059	Q9R059	Four and a half LIM domains protein 3
Pfkl	4.31309	3.50814	0.000224719	11.3609	12	12.6655	16.3716	15.8969	16.6971	No	Yes	19.5491	0	16.43	8	4	1	2	2	4	3	3	P12382;P47857	P12382	ATP-dependent 6-phosphofructokinase, liver type
Thop1	4.3106	3.98427	0.000207254	11.3647	11.2362	10.5778	15.4966	14.9274	15.6864	No	Yes	22.1809	0	9.0742	8	4	2	2	1	4	3	3	A0A0R4IZY0;Q8C1A5	A0A0R4IZY0;Q8C1A5	Thimet oligopeptidase
Vps33b	4.31056	2.29634	0.000152069	8.46114	11.5658	10.4918	14.1087	14.4369	14.9049	No	Yes	20.8067	0	3.5668	5	2	1	2	1	2	2	2	P59016;S4R227;S4R1H4	P59016;S4R227;S4R1H4	Vacuolar protein sorting-associated protein 33B
Lancl1	4.30966	1.90673	0.000401025	10.3974	11.1274	7.34279	14.0309	13.1771	14.5885	Yes	Yes	22.9038	0.00056117	1.9477	3	1	0	1	0	1	1	1	B2KGR2;O89112	B2KGR2;O89112	LanC-like protein 1
Stam2	4.30135	3.40317	0.000173267	9.49661	10.2641	NaN	14.1514	14.048	14.3457	No	Yes	21.69	0	3.5509	4	2	1	1	0	2	2	2	O88811	O88811	Signal transducing adapter molecule 2
Actr10	4.30049	2.23571	0.000143767	11.2102	10.0917	7.9354	14.0725	13.7421	14.3241	Yes	Yes	21.5378	0	3.5486	3	2	0	1	0	1	2	2	Q9QZB7	Q9QZB7	Actin-related protein 10
Alg2	4.30031	3.77208	0.000287474	11.467	12.3021	11.2531	16.2002	15.5758	16.1472	No	Yes	23.2701	0	25.938	11	5	2	3	2	5	5	5	Q9DBE8;F6RBY3	Q9DBE8;F6RBY3	Alpha-1,3/1,6-mannosyltransferase ALG2
Hemgn	4.29747	3.20421	0.000156425	12.9404	12.8132	12.4429	16.6937	18.0273	16.3679	No	Yes	24.3878	0	24.365	15	7	2	3	3	4	7	3	Q9ERZ0	Q9ERZ0	Hemogen
Mrpl15	4.29659	3.54852	0.000230643	11.6238	12.2917	11.4313	16.0111	15.5226	16.7029	No	Yes	22.9475	0	12.606	9	5	1	4	1	5	5	5	Q9CPR5;A0A0A6YVP4	Q9CPR5;A0A0A6YVP4	39S ribosomal protein L15, mitochondrial
Dync1li2	4.29641	3.01337	0.000130719	10.5226	9.95873	11.6858	14.7882	14.6408	15.6273	No	Yes	22.3656	0	6.2978	3	2	1	1	2	2	2	2	Q6PDL0;A0A1D5RM94;A0A1D5RMC1	Q6PDL0;A0A1D5RM94;A0A1D5RMC1	Cytoplasmic dynein 1 light intermediate chain 2
Ckap4	4.29443	4.45256	0.00030888	16.8803	17.2084	16.8128	21.1713	20.9313	21.6823	No	Yes	27.6701	0	204.32	107	29	16	23	19	24	25	27	Q8BMK4	Q8BMK4	Cytoskeleton-associated protein 4
Nbeal2	4.29423	4.86095	0	10.5755	10.475	10.1708	14.7046	14.4259	14.9736	No	Yes	20.2004	0.0042542	1.4672	4	2	1	1	1	2	2	2	F6ZZB1;F6VTL9;A0A0G2JFQ4;E9Q9L6;Q6ZQA0	F6ZZB1;F6VTL9;A0A0G2JFQ4;E9Q9L6;Q6ZQA0	Neurobeachin-like protein 2
Myg1	4.2906	2.40283	0.000165966	10.9184	12.2558	NaN	16.4126	15.2094	16.0111	No	Yes	23.3822	0	16.869	8	4	2	3	0	4	2	3	Q9JK81;F8WGG3;F7A3N3	Q9JK81;F8WGG3	UPF0160 protein MYG1, mitochondrial
Btk	4.28477	2.51745	8.12065e-05	13.583	13.6648	11.2129	17.0484	17.0028	17.2639	No	Yes	23.8193	0	25.098	17	6	3	4	1	6	6	6	A2BDW0;P35991	A2BDW0;P35991	Tyrosine-protein kinase BTK
Eif4h	4.2829	2.55433	8.35322e-05	12.2667	14.9122	13.1837	17.9538	17.4653	17.7922	No	Yes	26.1378	0	6.9603	9	3	2	3	2	3	3	3	Q9WUK2	Q9WUK2	Eukaryotic translation initiation factor 4H
Rpa3	4.28231	5.55385	0	12.1266	12.3194	11.9635	16.437	16.2639	16.5556	No	Yes	24.5915	0	11.347	20	4	2	2	2	4	4	4	Q9CQ71	Q9CQ71	Replication protein A 14 kDa subunit
Ptgr2	4.2806	1.69841	0.000559068	7.11834	11.6862	10.6706	14.3315	13.4197	14.5658	Yes	Yes	22.5951	0	22.427	5	3	0	0	0	3	2	3	Q8VDQ1;Q3TXN1;D6RGL6	Q8VDQ1;Q3TXN1	Prostaglandin reductase 2
Gphn	4.28045	3.21827	0.000156951	10.0446	9.64875	8.44684	13.3083	13.6527	14.0205	Yes	Yes	20.4915	0	3.9414	2	1	0	0	0	1	1	1	A0JNY3;Q8BUV3	A0JNY3;Q8BUV3	Gephyrin;Molybdopterin adenylyltransferase;Molybdopterin molybdenumtransferase
Ppp1r12a	4.27948	4.59408	0.00034188	13.2129	13.4324	12.8451	17.6981	17.158	17.4728	No	Yes	23.2455	0	7.9259	12	6	4	4	5	5	5	4	Q9DBR7;A0A1W2P750;A0A571BGD8;Q8BG95	Q9DBR7;A0A1W2P750	Protein phosphatase 1 regulatory subunit 12A
Sts	4.27856	3.44654	0.000201149	12.6063	13.2257	11.8609	16.6454	16.5867	17.2966	No	Yes	23.053	0	16.69	17	7	3	4	2	6	6	7	P50427	P50427	Steryl-sulfatase
Fyb	4.2738	3.18514	0.000151844	15.1791	14.6381	13.8479	18.983	18.132	19.3715	No	Yes	24.8877	0	29.559	30	11	8	5	5	11	9	11	O35601;A0A2I3BPY6;A0A2I3BRH1;F6V072	O35601	FYN-binding protein
Snx8	4.27231	4.14559	0.000233918	8.47617	9.06923	8.57413	12.5142	13.1171	13.3051	Yes	Yes	20.7317	0	2.7359	2	1	0	0	0	1	1	1	Q3U0I9;Q8CFD4	Q3U0I9;Q8CFD4	Sorting nexin-8
Dis3	4.26955	3.13066	0.000143296	10.6161	11.7672	12.2746	15.6191	15.5324	16.3151	No	Yes	21.7009	0	6.24	6	4	1	2	3	4	4	4	Q9CSH3;A0A2I3BR78	Q9CSH3;A0A2I3BR78	Exosome complex exonuclease RRP44
Prex1	4.2689	4.27547	0.000257235	13.6929	13.9903	13.4739	18.2355	17.5178	18.2106	No	Yes	23.4352	0	33.395	23	14	5	7	5	11	12	12	Q69ZK0;I7HPV9	Q69ZK0;I7HPV9	Phosphatidylinositol 3,4,5-trisphosphate-dependent Rac exchanger 1 protein
Celf2	4.26607	3.8045	0.000286299	13.2232	14.0666	13.1023	17.8719	17.3223	17.996	No	Yes	24.7181	0	27.53	25	6	2	4	2	6	5	6	A0A0R4J2B0;V9GX43;S4R2U7;S4R1S7;E9QA47;Q9Z0H4;S4R2J2;S4R2L5;A3KGT0;S4R2S7;S4R2U1	A0A0R4J2B0;V9GX43;S4R2U7;S4R1S7;E9QA47;Q9Z0H4;S4R2J2;S4R2L5;A3KGT0	CUGBP Elav-like family member 2
Rnps1	4.26471	2.35293	0.000156436	12.9123	14.6404	11.6858	17.2187	16.9734	17.8406	No	Yes	25.7659	0	14.714	13	3	3	3	1	3	3	3	Q99M28	Q99M28	RNA-binding protein with serine-rich domain 1
Cpsf7	4.26391	5.16227	0	12.3596	12.5069	12.001	16.5224	16.4475	16.6893	No	Yes	24.1614	0	13.706	11	5	2	3	2	4	5	5	Q8BTV2;A0A494B9T0;A0A494BAS7;A0A494BAN3;A0A494BBL0	Q8BTV2	Cleavage and polyadenylation specificity factor subunit 7
Hpgds	4.26366	2.00357	0.00031677	10.0233	10.9966	NaN	15.5527	15.325	13.4431	No	Yes	20.8535	0.00083822	1.9088	0	1	1	1	0	1	1	1	Q9JHF7	Q9JHF7	Hematopoietic prostaglandin D synthase
Fmr1	4.26328	2.67421	9.23483e-05	11.3506	12.5435	10.1172	15.5585	15.2821	15.9605	No	Yes	22.2853	0	16.023	5	4	3	4	1	4	4	4	E9QAT0;D3Z6U8;E9QNF5;Q6AXB7;P35922;E9QAS9;E9QAS8	E9QAT0;D3Z6U8;E9QNF5;Q6AXB7;P35922;E9QAS9;E9QAS8	Fragile X mental retardation protein 1 homolog
Ttr	4.26271	5.1092	0	15.6065	15.7449	15.3612	19.7413	19.6697	20.0897	No	Yes	28.1526	0	37.982	8	4	3	3	3	4	4	4	P07309	P07309	Transthyretin
Galns	4.26253	2.93581	0.000120482	12.558	13.8814	11.8535	16.7377	17.0181	17.3248	No	Yes	23.5418	0	39.669	20	7	4	6	4	6	7	7	Q571E4;Q8CC47	Q571E4;Q8CC47	N-acetylgalactosamine-6-sulfatase
Gnl3	4.26122	3.4731	0.000203488	9.43408	9.10645	8.75722	12.9656	14.1632	12.9526	Yes	Yes	20.5429	0	3.3295	2	3	1	0	0	2	3	2	Q8CI11;A0A2I3BRV9;A0A2I3BR82;A0A2I3BPZ6	Q8CI11;A0A2I3BRV9	Guanine nucleotide-binding protein-like 3
Synj1	4.2598	4.04402	0.000206186	9.53348	10.0121	9.86651	14.465	13.512	14.2145	No	Yes	19.3788	0	11.156	3	2	1	1	1	2	2	2	E9Q7S0;F7BQW7;D3Z656;Q8CHC4;F6XIX0;F7CD11;A0A338P6C7;D3Z1M7	E9Q7S0;F7BQW7;D3Z656;Q8CHC4;F6XIX0;F7CD11;A0A338P6C7;D3Z1M7	Synaptojanin-1
Tor3a	4.25823	3.46563	0.000201729	8.73129	9.99331	9.66868	14.0914	13.2719	13.8046	Yes	Yes	21.6003	0.0072464	1.2498	3	2	0	0	0	1	2	2	Q9ER38	Q9ER38	Torsin-3A
Tlr9	4.25423	4.00457	0.000346535	13.2771	13.6348	12.8717	17.4369	17.1454	17.964	No	Yes	23.8761	0	7.3991	14	7	4	5	4	7	7	7	Q9EQU3	Q9EQU3	Toll-like receptor 9
Abhd16a;Abhd16b	4.25246	2.88939	0.000114007	9.65382	11.4366	9.65537	14.1602	14.4217	14.9213	No	Yes	21.8524	0	4.3683	4	2	1	2	1	2	2	2	Q9Z1Q2;Q80YU0	Q9Z1Q2;Q80YU0	Abhydrolase domain-containing protein 16A;Abhydrolase domain-containing protein 16B
Git2	4.24939	3.37457	0.000161105	10.1131	10.3325	9.63248	14.4884	14.0624	NaN	Yes	Yes	20.7416	0	2.5919	2	1	0	0	0	1	1	0	Q9JLQ2	Q9JLQ2	ARF GTPase-activating protein GIT2
Casp7	4.24602	2.70193	9.4086e-05	10.9414	8.77444	9.01462	13.6014	13.6622	14.2049	Yes	Yes	21.667	0	2.973	2	1	0	0	0	1	1	1	P97864	P97864	Caspase-7;Caspase-7 subunit p20;Caspase-7 subunit p11
Grhpr	4.24591	4.00315	0.000339806	12.2631	12.8384	11.8509	16.8677	16.3701	16.4523	No	Yes	24.6627	0	25.886	12	5	1	3	2	4	4	4	Q91Z53;D6REG4;B1AXQ0	Q91Z53;D6REG4	Glyoxylate reductase/hydroxypyruvate reductase
Tmem120a	4.24568	3.9708	0.000330969	9.74454	9.91082	9.38419	13.6519	13.6142	14.5105	No	Yes	22.0771	0	3.0489	2	1	1	1	1	1	1	1	Q8C1E7	Q8C1E7	Transmembrane protein 120A
Dhx8	4.24516	1.92995	0.00040176	11.1424	7.31097	10.3481	13.4228	13.8754	14.2387	Yes	Yes	20.094	0.0055003	1.3322	3	1	0	0	0	1	1	1	A2A4N9;A2A4P0	A2A4N9;A2A4P0	ATP-dependent RNA helicase DHX8
Vps51	4.24435	2.36056	0.000156204	7.55509	9.95262	7.73106	12.2172	12.2249	13.5297	Yes	Yes	19.4815	0.0089836	1.1952	2	1	0	0	0	1	1	1	Q3UVL4	Q3UVL4	Vacuolar protein sorting-associated protein 51 homolog
Nucks1	4.24243	2.64215	8.88325e-05	14.0235	14.4317	14.0416	19.8362	17.4599	17.928	No	Yes	27.695	0	4.2936	8	3	2	1	1	3	3	3	A0A087WRY3;Q80XU3	A0A087WRY3;Q80XU3	Nuclear ubiquitous casein and cyclin-dependent kinase substrate 1
Trappc8	4.2404	3.5714	0.000187668	9.36082	8.86855	9.15116	NaN	13.1097	13.6247	Yes	Yes	19.4176	0	2.3053	2	1	0	0	1	0	1	1	E9PY51;A0A286YCX6	E9PY51;A0A286YCX6
Rcsd1	4.24	3.21362	0.000152339	12.7741	12.6416	11.6561	17.2476	15.9286	16.6156	No	Yes	23.7724	0	33.281	8	4	3	3	3	4	3	3	Q3UZA1	Q3UZA1	CapZ-interacting protein
Macrod1	4.23725	1.92219	0.000400146	9.16669	12.045	8.13285	14.0306	13.5905	14.4351	Yes	Yes	22.3427	0	4.8355	2	2	0	1	1	1	1	1	Q922B1	Q922B1	O-acetyl-ADP-ribose deacetylase MACROD1
Gys1	4.23531	4.21401	0.000235988	7.93775	8.3347	8.03772	12.5376	11.8218	12.6567	Yes	Yes	19.3951	0	5.1765	3	1	0	0	0	1	1	1	A0A1B0GT92;Q9Z1E4	A0A1B0GT92;Q9Z1E4	Glycogen [starch] synthase, muscle
Slc12a6;Slc12a5	4.23462	1.93459	0.000402497	10.343	9.12073	6.41714	12.9855	12.4005	13.1988	Yes	Yes	19.3025	0	2.6854	2	2	0	1	0	2	1	1	Q6P6P5;Q3V0N8;Q924N4;A0A076FR46;Q91V14	Q6P6P5;Q3V0N8;Q924N4;A0A076FR46;Q91V14	Solute carrier family 12 member 6;Solute carrier family 12 member 5
Ints6	4.2334	2.79938	0.000104012	9.74031	7.47472	8.68458	13.1308	12.7685	12.7006	Yes	Yes	19.3162	0.0039936	1.4888	1	1	0	0	0	1	1	1	Q6PCM2	Q6PCM2	Integrator complex subunit 6
Tprgl;Tprg1l	4.23332	2.08388	0.000298795	8.80459	11.838	8.67457	13.9137	13.6112	14.4923	Yes	Yes	22.0906	0	8.8643	4	2	0	2	0	2	2	2	B1AX95;Q9DBS2	B1AX95;Q9DBS2	Tumor protein p63-regulated gene 1-like protein
Hadh	4.23092	3.67515	0.000245614	13.729	14.0643	13.2641	17.8348	17.4126	18.5028	No	Yes	26.1989	0	22.92	23	7	4	4	4	5	6	6	Q61425	Q61425	Hydroxyacyl-coenzyme A dehydrogenase, mitochondrial
Pnkp	4.23076	4.80847	0.000366972	14.3633	14.3855	14.0592	18.703	18.1556	18.6416	No	Yes	24.8496	0	46.862	37	11	4	6	5	11	11	10	G5E8N7;Q9JLV6;E9Q9A5;A0A0J9YVJ6;A0A140LIZ1;A0A0J9YV48;A0A0J9YTV1;A0A0J9YUF9	G5E8N7;Q9JLV6;E9Q9A5;A0A0J9YVJ6	Bifunctional polynucleotide phosphatase/kinase;Polynucleotide 3-phosphatase;Polynucleotide 5-hydroxyl-kinase
Wash1	4.22963	2.75227	9.70874e-05	8.92083	10.0747	NaN	13.7334	13.3732	14.0757	No	Yes	20.4242	0	2.4836	2	2	1	1	0	2	2	2	Q8VDD8	Q8VDD8	WAS protein family homolog 1
Pgam1	4.22936	3.87998	0.00029724	16.4981	16.59	15.577	20.6727	20.2258	20.4547	No	Yes	27.4867	0	68.988	64	9	7	7	6	9	9	9	Q9DBJ1;O70250	Q9DBJ1	Phosphoglycerate mutase 1
Osgep	4.22913	2.88574	0.00011236	9.81647	10.6251	9.24758	13.6541	13.6166	15.1058	No	Yes	21.9174	0.0011151	1.8865	3	3	1	2	1	2	2	3	A0A0R4J1Y3;Q8BWU5;E0CYN9;E0CXW7;E0CYK9;E9QMF4	A0A0R4J1Y3;Q8BWU5;E0CYN9	Probable tRNA N6-adenosine threonylcarbamoyltransferase
Asns	4.22896	4.0963	0.000208333	8.62521	9.02837	9.37199	13.3199	12.8258	13.5668	Yes	Yes	20.0276	0	21.287	7	3	0	1	0	3	3	3	Q61024	Q61024	Asparagine synthetase [glutamine-hydrolyzing]
Tma7	4.22887	3.93013	0.000314607	14.1672	14.2347	13.9578	17.9585	18.0881	18.9997	No	Yes	28.2743	0	3.9012	10	2	1	1	1	1	2	2	Q8K003	Q8K003	Translation machinery-associated protein 7
Elmo2	4.22819	3.29302	0.000164512	11.4488	11.956	10.6532	15.0207	15.6083	16.1136	No	Yes	22.3553	0	36.305	12	5	2	3	2	4	5	5	Q8BHL5;F6YXR3;Q5GMG0	Q8BHL5;F6YXR3	Engulfment and cell motility protein 2
Pigs	4.228	1.92043	0.000398981	8.05518	11.4155	7.96697	12.8147	13.2287	14.0783	Yes	Yes	18.158	0	2.7684	1	2	0	2	0	1	2	2	Q6PD26	Q6PD26	GPI transamidase component PIG-S
Mre11a	4.22741	3.26178	0.000157835	9.62129	10.5068	9.07234	14.2385	14.2422	13.402	Yes	Yes	21.7188	0	7.7033	2	2	1	0	0	2	2	1	F6RX99;Q61216	F6RX99;Q61216	Double-strand break repair protein MRE11A
Ints5	4.22698	3.13874	0.000132701	NaN	10.0823	9.37896	13.9605	13.6036	14.3088	No	Yes	20.7292	0.0037294	1.4928	2	1	0	1	1	1	1	1	Q8CHT3	Q8CHT3	Integrator complex subunit 5
Zc3h4	4.22696	1.81004	0.000444444	NaN	9.09447	10.1351	15.4155	12.8471	13.2627	No	Yes	19.6715	0	3.5128	5	3	0	1	1	3	1	2	A0A1B0GRU3;E9Q8K8;Q6ZPZ3	A0A1B0GRU3;E9Q8K8;Q6ZPZ3	Zinc finger CCCH domain-containing protein 4
Mrpl11	4.22663	4.80697	0.000361991	12.4456	12.6338	12.2346	16.6443	16.3869	16.9628	No	Yes	24.1635	0	12.385	10	8	3	4	4	7	7	7	Q9CQF0;A0A494B9H5;A0A494B9R3;A0A494B915	Q9CQF0;A0A494B9H5;A0A494B9R3	39S ribosomal protein L11, mitochondrial
Basp1	4.22604	3.74609	0.000262172	17.0079	16.6259	16.1826	20.5132	20.5679	21.4134	No	Yes	28.9015	0	187.62	39	11	7	9	7	8	8	7	Q91XV3	Q91XV3	Brain acid soluble protein 1
Ndufs6	4.22575	3.30952	0.000167064	14.4349	15.3498	14.8504	18.8017	18.5945	19.9163	No	Yes	25.5672	0	35.848	30	7	3	3	3	5	5	7	P52503;A0A1Y7VM38;A0A1Y7VKP8	P52503;A0A1Y7VM38;A0A1Y7VKP8	NADH dehydrogenase [ubiquinone] iron-sulfur protein 6, mitochondrial
Mpi	4.22551	2.23102	0.000175299	8.1593	10.5858	7.5435	13.2856	12.4913	13.1883	Yes	Yes	20.7161	0	5.1119	3	1	0	0	0	1	1	1	Q924M7	Q924M7	Mannose-6-phosphate isomerase
Fau	4.22502	4.59253	0.00031746	13.7627	13.9702	13.5769	18.3369	17.6467	18.0012	No	Yes	28.9655	0	3.8269	8	2	1	1	1	2	2	2	A0A494B9Z0;A0A494BBA8;Q642K5;P62862	A0A494B9Z0;A0A494BBA8;Q642K5;P62862	40S ribosomal protein S30
Asun	4.22484	3.15715	0.000142712	8.70442	9.17943	7.46429	12.6401	12.4188	12.9637	Yes	Yes	20.2812	0.00056101	1.9474	1	1	0	0	0	1	1	1	F6W761;Q8QZV7	F6W761;Q8QZV7	Protein asunder homolog
Gns	4.22246	3.25159	0.000155383	14.5642	15.3102	14.5999	18.2585	19.0921	19.791	No	Yes	26.6473	0	37.726	38	9	4	6	5	7	9	9	Q8BFR4;A0A1W2P6W9;A0A1W2P8D3	Q8BFR4	N-acetylglucosamine-6-sulfatase
Ddx42	4.22208	2.70534	9.32091e-05	11.5432	13.1215	10.8106	15.9941	15.7558	16.3917	No	Yes	21.7889	0	12.809	9	4	1	3	1	4	4	4	Q810A7	Q810A7	ATP-dependent RNA helicase DDX42
Ppp2r5a	4.2217	3.27534	0.000160183	12.801	11.9026	11.1876	16.325	15.8405	16.3908	No	Yes	22.8067	0	6.4041	9	5	3	2	1	5	5	5	Q6PD03	Q6PD03	Serine/threonine-protein phosphatase 2A 56 kDa regulatory subunit alpha isoform
Metap2	4.22162	3.28489	0.000162037	12.3058	13.5862	12.0413	16.6449	16.8504	17.1029	No	Yes	23.3099	0	7.3413	13	6	2	5	3	5	6	5	Q3UI33;O08663;Q3TMN1;M0QWX0;M0QW69;M0QW48;M0QWM9	Q3UI33;O08663;Q3TMN1;M0QWX0	Methionine aminopeptidase 2;Methionine aminopeptidase
Arid1a	4.2208	4.49672	0.000296296	11.2072	11.7392	11.0932	15.534	15.3465	15.8215	No	Yes	21.047	0	3.8727	3	3	1	2	1	3	3	3	E9QAQ7;A2BH40	E9QAQ7;A2BH40	AT-rich interactive domain-containing protein 1A
Anks1;Anks1a	4.22052	4.45973	0.000323326	NaN	9.64815	9.64468	13.7573	13.77	14.0735	No	Yes	24.3866	0.0037284	1.4921	3	1	0	1	1	1	1	1	A0A3B2W446;A0A3B2WCH8;A0A3B2W4B0;A0A3B2W4H6;A0A3B2W7H4;A0A3B2WAQ7;Q3UHP6;P59672	A0A3B2W446;A0A3B2WCH8;A0A3B2W4B0;A0A3B2W4H6;A0A3B2W7H4;A0A3B2WAQ7;Q3UHP6;P59672	Ankyrin repeat and SAM domain-containing protein 1A
Leo1	4.22031	5.12445	0	10.7567	11.0386	10.6107	14.9253	14.8959	15.2458	No	Yes	21.8894	0	7.45	5	2	1	1	1	2	2	2	Q5XJE5	Q5XJE5	RNA polymerase-associated protein LEO1
A2m	4.2201	5.50572	0	15.1779	15.2117	15.0331	19.1818	19.3037	19.5975	No	Yes	23.0442	0	120.5	46	16	10	11	8	14	15	16	Q61838;D3YUI3;CON__ENSEMBL:ENSBTAP00000024146	Q61838	Alpha-2-macroglobulin;Alpha-2-macroglobulin 165 kDa subunit;Alpha-2-macroglobulin 35 kDa subunit
Mrpl47	4.21832	2.51406	0.000119302	9.82265	11.3425	NaN	14.8938	14.4714	15.0375	No	Yes	22.7986	0	2.2739	5	2	1	2	0	2	2	2	Q8K2Y7	Q8K2Y7	39S ribosomal protein L47, mitochondrial
Hnrnpll	4.21774	3.78836	0.000267686	12.7818	12.6983	11.6937	16.4405	16.5707	16.8158	No	Yes	22.2151	0	19.865	18	8	4	4	3	6	7	7	Q921F4;V9GXB6	Q921F4;V9GXB6	Heterogeneous nuclear ribonucleoprotein L-like
Rps15a	4.21769	4.53375	0.000301887	16.0033	15.4004	15.7623	19.7453	19.8178	20.2559	No	Yes	29.0551	0	9.6078	24	6	5	4	5	5	5	4	P62245;D3Z712;F8WJ41;D3YVB4	P62245;D3Z712;F8WJ41;D3YVB4	40S ribosomal protein S15a
Eif4e	4.21748	2.39668	0.000159757	11.8678	13.3183	10.523	16.2866	15.5434	16.5315	No	Yes	22.5041	0	4.817	5	1	1	1	1	1	1	1	A0A0G2JFB4;A0A0G2JH04;P63073	A0A0G2JFB4;A0A0G2JH04;P63073	Eukaryotic translation initiation factor 4E
Naa40	4.21651	1.78402	0.000455262	9.5973	11.1344	6.66401	13.3685	13.1185	13.5581	Yes	Yes	21.9496	0	3.0361	3	1	0	0	0	1	1	1	A0A494B9D7;Q8VE10	A0A494B9D7;Q8VE10	N-alpha-acetyltransferase 40
Adprhl2	4.21609	3.68551	0.000244328	11.6141	12.4379	11.3736	15.9466	15.6912	16.436	No	Yes	23.72	0	13.464	9	3	1	3	1	3	3	3	Q8CG72	Q8CG72	Poly(ADP-ribose) glycohydrolase ARH3
Chrac1	4.21603	1.40536	0.000967584	11.2413	10.6996	7.27813	13.7992	NaN	14.1123	No	Yes	23.0334	0.0027064	1.6358	3	1	1	1	1	1	1	1	D3Z0U4;Q9JKP8	D3Z0U4;Q9JKP8	Chromatin accessibility complex protein 1
Rpl6	4.216	3.44525	0.000191518	17.4912	18.1628	16.8799	21.4431	21.505	22.2338	No	Yes	29.762	0	58.736	93	14	9	11	9	13	14	14	P47911;A0A0J9YU32	P47911	60S ribosomal protein L6
Fxn	4.21288	2.21668	0.000210801	10.3206	12.3028	9.0722	14.6891	14.4328	15.2124	No	Yes	23.1084	0	2.553	3	1	1	1	1	1	1	1	O35943	O35943	Frataxin, mitochondrial;Frataxin intermediate form;Frataxin mature form
Nfya	4.2128	1.5791	0.00077753	9.093	7.11923	12.1241	14.6979	13.2032	13.0736	Yes	Yes	24.0838	0	28.752	4	1	0	0	0	1	1	1	F6TWX0;F7DFJ2;A0A0R4J1Y8;E0CYF3;Q9DBV7;P23708	F6TWX0;F7DFJ2;A0A0R4J1Y8;E0CYF3;Q9DBV7;P23708	Nuclear transcription factor Y subunit alpha
Mrps7	4.21268	3.45743	0.000192837	10.8757	11.9507	10.95	15.3633	15.05	16.0012	No	Yes	23.9031	0	7.726	8	2	2	2	2	2	2	2	Q80X85	Q80X85	28S ribosomal protein S7, mitochondrial
Ncapd2	4.21084	2.07255	0.000295004	12.0897	8.63256	10.2616	14.2969	15.2818	14.0376	No	Yes	17.6785	0	12.176	3	3	2	1	1	3	3	1	A0A0R4J0H7;Q8K2Z4	A0A0R4J0H7;Q8K2Z4	Condensin complex subunit 1
Lrba	4.2103	2.8596	0.00010566	8.96354	8.19098	NaN	12.5271	12.4919	13.3437	No	Yes	16.1338	0	3.7994	2	3	1	1	0	1	2	2	A0A0A6YXX3;A0A0A6YXL6;E9Q3Y4;Q9ESE1;A0A1D5RM41;Q8BSM6;Q9EPN1	A0A0A6YXX3;A0A0A6YXL6;E9Q3Y4;Q9ESE1;A0A1D5RM41	Lipopolysaccharide-responsive and beige-like anchor protein
Ap1m1	4.21012	1.5551	0.000773825	10.6569	14.1117	NaN	15.9669	16.5021	17.3142	No	Yes	23.6764	0	15.224	14	6	1	4	0	4	5	5	P35585;A0A1D5RLL9;A0A1D5RMJ1;A0A1D5RLW6;D3YZ71;A0A1L1SUA0;A0A0R4IZX6;A0A0R4J1L4;Q9WVP1	P35585	AP-1 complex subunit mu-1
Tsr1	4.2097	3.07889	0.000131951	9.54498	11.3948	10.0993	14.3486	14.5906	14.729	No	Yes	21.7923	0	13.541	3	2	1	2	1	2	2	2	Q5SWD9	Q5SWD9	Pre-rRNA-processing protein TSR1 homolog
Npc1	4.20633	3.89767	0.000292887	13.6003	14.2117	13.4324	17.5765	17.866	18.4209	No	Yes	24.8943	0	20.458	19	6	2	4	2	6	6	6	O35604	O35604	Niemann-Pick C1 protein
H2-D1;H2-L	4.20628	2.45758	0.000167817	16.3336	17.8039	15.0669	20.6618	20.1798	20.9817	No	Yes	27.6053	0	43.711	41	12	8	10	5	12	11	11	G3UZP7;P01899;P01897;E9PWT4;Q8HWB2;P14430;P79568;E9QJR9;P14429;L7N260;P01896;P14431;P14426;A7VMS6;E9Q0G4;G3UXE9;G3UZL7;E9PX63;P06339;Q4KN81;O19441;P01895;Q05A75	G3UZP7;P01899;P01897	H-2 class I histocompatibility antigen, D-B alpha chain;H-2 class I histocompatibility antigen, L-D alpha chain
Mmp8	4.20577	3.33149	0.000168269	13.6652	13.2582	13.3614	18.4807	16.8826	17.5388	No	Yes	25.2431	0	16.048	18	7	4	3	4	6	5	6	O70138	O70138	Neutrophil collagenase
Srek1	4.2049	4.02763	0.000333333	9.05682	9.64425	10.0701	13.763	13.605	14.0179	No	Yes	22.3722	0	4.7464	6	2	1	1	1	2	2	2	A0A1B0GSB4;A0A1B0GSR3;Q8BZX4	A0A1B0GSB4;A0A1B0GSR3;Q8BZX4	Splicing regulatory glutamine/lysine-rich protein 1
Kif5b	4.20474	3.27869	0.00015748	15.2401	15.6615	14.2488	18.8605	19.1484	19.7557	No	Yes	24.8172	0	107.46	67	22	10	16	6	18	21	20	Q61768;E9QAK5;P33175;P28738	Q61768;E9QAK5	Kinesin-1 heavy chain;Kinesin-like protein
Srsf3	4.20426	3.59956	0.000221169	17.1178	17.8643	16.594	21.2656	21.1782	21.7451	No	Yes	29.9556	0	75.029	60	8	7	7	6	8	8	8	P84104	P84104	Serine/arginine-rich splicing factor 3
Sumo1	4.20356	3.59116	0.00021875	14.5241	15.0566	14.3808	18.8516	18.2449	19.4757	No	Yes	27.0968	0	19.386	14	4	2	3	2	4	4	4	P63166;A0A087WRQ4	P63166;A0A087WRQ4	Small ubiquitin-related modifier 1
Ptpn12	4.20328	4.70281	0.000333333	10.6139	10.8038	10.3297	14.6251	14.6188	15.1133	No	Yes	20.1214	0	5.6652	7	3	1	1	2	3	3	3	P35831	P35831	Tyrosine-protein phosphatase non-receptor type 12
Adgre5;Cd97	4.20003	3.92497	0.000301724	14.1315	14.5406	13.7567	18.1952	18.0043	18.8293	No	Yes	24.8689	0	58.112	31	9	5	6	5	9	9	9	E9QMJ5;E9QJS7;Q9Z0M6;Q9DC42;A0A0D9SEG8	E9QMJ5;E9QJS7;Q9Z0M6;Q9DC42;A0A0D9SEG8	CD97 antigen
Rbbp4	4.19714	2.6406	8.67948e-05	13.4142	15.1563	12.9395	17.5754	17.9694	18.5566	No	Yes	26.1856	0	24.728	15	7	2	4	2	5	6	7	Q60972	Q60972	Histone-binding protein RBBP4
Chmp3	4.19541	4.20602	0.000222841	11.1872	10.5683	10.8397	15.2324	14.6199	15.3292	No	Yes	24.1558	0	4.9368	6	2	1	1	2	2	2	2	Q9CQ10;A0A0N4SUX9	Q9CQ10;A0A0N4SUX9	Charged multivesicular body protein 3
Ppil1	4.19533	3.26815	0.000154185	13.0712	13.8935	12.3117	17.5241	16.8988	17.4395	No	Yes	23.273	0	11.398	11	5	2	4	1	5	4	3	Q9D0W5	Q9D0W5	Peptidyl-prolyl cis-trans isomerase-like 1
Pgm3	4.19391	2.80463	0.000101892	12.3884	12.2409	10.4284	15.8893	15.5378	16.2124	No	Yes	22.3094	0	5.4341	5	3	2	2	1	3	3	3	Q8BWW3;Q9CYR6	Q8BWW3;Q9CYR6	Phosphoacetylglucosamine mutase
Pam16	4.19376	3.05422	0.000127042	11.7463	13.2779	11.66	16.2323	16.1937	16.8395	No	Yes	25.7492	0	4.2987	5	3	1	2	1	2	2	2	Q9CQV1;A0A1L1SQA2	Q9CQV1;A0A1L1SQA2	Mitochondrial import inner membrane translocase subunit TIM16
Gtf2i	4.19273	3.25856	0.000153173	11.2315	9.71422	10.5636	14.2552	14.7589	15.0735	No	Yes	20.25	0	16.367	6	3	1	1	1	2	3	3	G3UYD0;Q3UHU8;Q9ESZ8;G3UYJ6;G3UX27;Q99NI3	G3UYD0;Q3UHU8;Q9ESZ8;G3UYJ6	General transcription factor II-I
Gbp7	4.19234	2.62794	8.56793e-05	9.91763	11.9552	9.68329	14.8003	14.4194	14.9135	No	Yes	21.4741	0	13.713	6	4	1	2	1	4	4	3	Q91Z40	Q91Z40
S100a8	4.19231	4.15006	0.000208877	19.7739	19.126	19.6994	24.1225	23.3989	23.6548	No	Yes	32.3518	0	238.38	249	5	5	5	5	5	5	5	P27005	P27005	Protein S100-A8
Yars	4.19106	3.7168	0.000246046	13.0346	13.8986	12.7624	17.2949	17.2247	17.7492	No	Yes	24.1099	0	21.026	17	7	3	5	4	6	5	6	A2A7S7;Q91WQ3	A2A7S7;Q91WQ3	Tyrosine--tRNA ligase;Tyrosine--tRNA ligase, cytoplasmic;Tyrosine--tRNA ligase, cytoplasmic, N-terminally processed
P2rx7	4.19089	2.21568	0.000212188	10.3873	8.66599	NaN	13.5483	13.2503	14.354	No	Yes	21.4656	0	2.4542	1	1	1	1	0	1	1	1	Q3UN00;F8WI93;C8YIX4;Q9Z1M0	Q3UN00;F8WI93;C8YIX4;Q9Z1M0	P2X purinoceptor;P2X purinoceptor 7
Fxr2	4.19079	3.09457	0.000132576	10.1844	8.50847	10.0393	13.8211	13.5228	13.9607	Yes	Yes	20.6966	0.0034881	1.5572	2	1	0	0	0	1	1	1	Q6P5B5;Q9WVR4	Q6P5B5;Q9WVR4	Fragile X mental retardation syndrome-related protein 2
Ap1s1	4.19009	2.82513	0.000101302	8.67809	9.53143	NaN	13.3321	12.8116	13.7409	No	Yes	23.0726	0.0037313	1.4958	1	1	1	1	0	1	1	1	D3Z268;D3Z0D6;D3YXN0;P61967	D3Z268;D3Z0D6;D3YXN0;P61967	AP-1 complex subunit sigma-1A
Nrd1	4.18946	4.35571	0.000246154	12.0126	11.311	11.7634	16.097	15.5687	15.9897	No	Yes	21.9963	0	29.922	19	4	2	2	1	4	4	4	A6PWC3;A2A9Q2;Q8BHG1	A6PWC3;A2A9Q2;Q8BHG1	Nardilysin
Sept15	4.18865	2.43345	0.000163307	13.3908	13.6951	11.1939	16.8226	16.5511	17.472	No	Yes	25.6262	0	13.231	8	4	3	3	1	4	4	4	A0A0R4J0K1;Q9ERR7;A0A0G2JEF3;A0A1C7ZMY4	A0A0R4J0K1;Q9ERR7;A0A0G2JEF3;A0A1C7ZMY4	15 kDa selenoprotein
Ube2m	4.18721	3.24488	0.000150376	13.8707	14.0004	12.8313	17.7433	17.1701	18.3505	No	Yes	26.0375	0	12.225	17	7	5	5	5	5	5	6	P61082;F7CDT0;F6WMC0;G5E919	P61082;F7CDT0;F6WMC0;G5E919	NEDD8-conjugating enzyme Ubc12
Ear6	4.18671	3.16503	0.000139303	17.4782	17.8601	17.4452	21.1095	21.4506	22.7836	No	Yes	30.8137	0	63.308	47	6	5	5	3	6	6	6	Q923L7	Q923L7
	4.18508	4.05348	0.000334129	13.4698	14.0381	13.2415	17.5215	17.615	18.1683	No	Yes	25.7452	0	50.122	29	8	4	5	5	7	8	8	Q9CQE8	Q9CQE8	UPF0568 protein C14orf166 homolog
Npepps	4.18188	4.41705	0.00025974	13.6927	13.4323	12.9666	17.5369	17.3172	17.7831	No	Yes	23.3423	0	47.276	33	12	3	5	3	11	11	12	Q11011;F6QYF8;E9Q039;E9Q6F4;F6V7K3;F7ANF4;F2Z3V5	Q11011;F6QYF8;E9Q039;E9Q6F4	Puromycin-sensitive aminopeptidase
Senp7	4.18104	2.86141	0.000104244	9.56532	8.50197	9.46132	13.5346	NaN	13.1799	Yes	Yes	21.0398	0.00028539	2.0658	1	1	0	0	0	1	0	1	Q9CRF0;Q9CX65;Q9CQN9;A0A0J9YUC9;E9Q1L5;Q8BUH8	Q9CRF0;Q9CX65;Q9CQN9;A0A0J9YUC9;E9Q1L5;Q8BUH8	Sentrin-specific protease 7
Aldh16a1	4.18104	3.9007	0.000285714	13.4321	13.6707	13.2379	17.2564	17.3706	18.2569	No	Yes	24.8898	0	14.003	12	5	4	4	5	4	5	5	D3Z0B9;A0A1B0GSU0;Q571I9	D3Z0B9;A0A1B0GSU0;Q571I9	Aldehyde dehydrogenase family 16 member A1
Eif2b3	4.18094	2.99461	0.000121528	9.03534	9.52013	9.35577	13.2987	12.6086	14.5468	Yes	Yes	21.1388	0.0047544	1.4121	2	2	0	1	0	1	1	2	B1AUN3;Q3UKV0;B1AUN2	B1AUN3;Q3UKV0;B1AUN2
Tbc1d1	4.18039	3.42983	0.000181347	9.96793	10.0677	8.95921	14.3348	13.3764	13.8248	Yes	Yes	17.2819	0	3.3872	2	2	0	1	0	2	2	1	Q60949;E9Q6L4;F6QUA9	Q60949;E9Q6L4;F6QUA9	TBC1 domain family member 1
Ccar2	4.1784	3.64834	0.000227273	11.9586	13.1832	13.0039	17.0804	16.7443	16.8562	No	Yes	23.0989	0	14.424	19	7	4	5	4	7	7	6	Q8VDP4	Q8VDP4	Cell cycle and apoptosis regulator protein 2
Epx	4.17824	2.84788	0.000105501	16.4865	16.5339	16.1518	19.7097	20.2044	21.7927	No	Yes	27.4594	0	56.691	66	19	12	12	10	15	15	18	P49290	P49290	Eosinophil peroxidase;Eosinophil peroxidase light chain;Eosinophil peroxidase heavy chain
Cirbp	4.17789	3.20296	0.000143885	11.6599	12.6295	11.2247	16.0333	15.4803	16.5342	No	Yes	25.1645	0	52.393	13	4	2	2	2	4	4	4	D3YU80;K4DI65;P60824	D3YU80;K4DI65;P60824	Cold-inducible RNA-binding protein
Crot	4.17442	3.42608	0.0001566	9.03644	9.38352	NaN	13.5651	12.9778	13.6102	No	Yes	20.4184	0	3.6914	3	1	1	1	0	1	1	1	Q9DC50	Q9DC50	Peroxisomal carnitine O-octanoyltransferase
Mrps28	4.1733	4.59635	0.000299625	11.4334	11.3414	10.984	15.1897	15.3101	15.779	No	Yes	24.1063	0	6.0387	7	3	1	1	1	2	3	3	Q9CY16	Q9CY16	28S ribosomal protein S28, mitochondrial
Zap70	4.17321	2.0544	0.000317757	8.84652	11.0948	7.42435	13.2137	13.2034	13.4682	Yes	Yes	20.2521	0	3.8797	4	2	0	1	0	1	2	2	P43404;A0A087WQ05	P43404;A0A087WQ05	Tyrosine-protein kinase ZAP-70
Ppil3	4.17253	4.22688	0.000217391	11.0871	11.1748	10.6982	14.8901	14.9517	15.6359	No	Yes	22.3675	0	11.055	7	2	1	1	1	2	2	2	Q9D6L8	Q9D6L8	Peptidyl-prolyl cis-trans isomerase-like 3
Prpf18	4.17049	3.07029	0.000126927	9.01136	9.97751	8.22181	12.7828	13.4587	13.4806	Yes	Yes	23.8081	0	2.7062	2	1	0	0	0	1	1	1	A0A0A6YW97;Q8BM39	A0A0A6YW97;Q8BM39	Pre-mRNA-splicing factor 18
Dars2	4.16765	4.20866	0.00021164	10.1402	10.6828	10.5333	14.5288	14.2709	15.0595	No	Yes	20.3147	0	4.2422	4	2	1	1	1	2	2	2	Q8BIP0	Q8BIP0	Aspartate--tRNA ligase, mitochondrial
Ctbs	4.16757	3.3913	0.000173482	13.0473	12.8429	11.8983	16.472	16.4723	17.3468	No	Yes	23.0841	0	3.1255	5	3	2	3	1	3	3	3	Q8R242	Q8R242	Di-N-acetylchitobiase
Usp14	4.16682	1.97701	0.00040789	9.67982	13.2374	12.7564	16.4168	15.7737	15.9836	No	Yes	23.3496	0	27.233	11	6	1	5	2	6	5	5	E9PYI8;Q9JMA1	E9PYI8;Q9JMA1	Ubiquitin carboxyl-terminal hydrolase;Ubiquitin carboxyl-terminal hydrolase 14
Adck3	4.16607	2.67727	8.82724e-05	9.17504	7.93126	10.2051	13.7987	13.0743	12.9366	Yes	Yes	19.8918	0	2.8469	3	2	0	0	0	2	2	1	Q60936;E0CXI5;E0CYD3;E0CYT4;E0CYG7;E0CZ05;E0CXT4;A0A0A6YXD9;E0CXR6;E0CYC1;E0CXR1;F7B1B6	Q60936;E0CXI5;E0CYD3;E0CYT4;E0CYG7;E0CZ05;E0CXT4;A0A0A6YXD9;E0CXR6;E0CYC1;E0CXR1;F7B1B6	Atypical kinase ADCK3, mitochondrial
Paf	4.16549	2.72615	9.22874e-05	10.2465	10.1827	8.26295	13.388	14.1496	13.651	Yes	Yes	23.1004	0	3.3797	1	1	0	0	0	1	1	1	Q9CQX4	Q9CQX4	PCNA-associated factor
Eif5b	4.16514	4.90462	0.000353982	14.544	14.7643	14.4421	18.4281	18.8577	18.96	No	Yes	24.4015	0	94.38	38	15	6	8	6	14	15	14	Q05D44	Q05D44	Eukaryotic translation initiation factor 5B
Ncf2	4.16313	2.74538	9.39597e-05	13.1155	14.246	13.0635	18.7455	16.9476	17.2213	No	Yes	24.772	0	16.561	13	6	3	3	3	6	6	5	O70145;A0A087WPH0	O70145	Neutrophil cytosol factor 2
Ifi205a	4.15896	3.26955	0.000150862	13.2214	14.3898	12.8832	17.4132	17.5392	18.0189	No	Yes	23.8933	0	18.642	11	5	2	3	2	4	4	4	P0DOV1;Q8CGE8;D3Z2E7;E9Q3L4	P0DOV1;Q8CGE8	Interferon-activable protein 205-A
Rpl28	4.15781	3.98015	0.00030303	15.8558	16.1019	15.2455	20.1263	19.4977	20.0526	No	Yes	28.9529	0	13.864	18	4	3	2	3	4	4	4	P41105	P41105	60S ribosomal protein L28
Reps1	4.15748	4.57734	0.000282686	12.0944	12.2452	12.0003	16.6002	15.8634	16.3488	No	Yes	23.1905	0	5.8856	10	3	2	2	2	3	2	2	D3Z2E3;F6R6F1;E9Q632;O54916;B9EI38;Q80XA6	D3Z2E3;F6R6F1;E9Q632;O54916	RalBP1-associated Eps domain-containing protein 1
Wnk1	4.15738	3.68393	0.000229885	12.5262	12.6644	11.8744	16.3016	16.1365	17.0991	No	Yes	22.353	0	10.568	8	6	3	3	2	5	5	6	P83741;F6U2S8;F7CZC4;F7CC62;E9PZ38;E9Q6Q2;E0CZE3;E9QMI9;E9QJQ9;E0CYT1;E9QMI8;E9QM73;Q80UE6;Q3UH66	P83741	Serine/threonine-protein kinase WNK1
Ly6c2	4.15538	4.06459	0.00032634	14.349	14.1318	13.5732	18.3143	17.7748	18.431	No	Yes	23.0713	0	25.849	14	3	2	2	2	3	3	3	P0CW03	P0CW03	Lymphocyte antigen 6C2
Casp1	4.15397	3.86282	0.000268714	14.1757	14.6444	13.9651	17.9305	18.4121	18.9045	No	Yes	25.9391	0	21.974	34	10	4	7	4	9	10	10	P29452;A0A571BF22;A0A571BDI1	P29452	Caspase-1;Caspase-1 subunit p20;Caspase-1 subunit p10
Itfg3	4.15303	3.02374	0.000122378	9.5814	8.87596	10.5944	13.5995	13.5217	14.3897	Yes	Yes	23.6199	0	2.2922	1	1	0	0	0	1	1	1	D3Z6P3;F6SQM4;Q8C0Z1	D3Z6P3;F6SQM4;Q8C0Z1	Protein ITFG3
LRWD1	4.15091	2.79465	9.83837e-05	8.78194	10.5014	10.9304	14.1726	14.2533	14.2406	No	Yes	19.9721	0	17.008	5	3	1	2	2	3	3	3	Q8BUI3;H9KV12	Q8BUI3	Leucine-rich repeat and WD repeat-containing protein 1
Rps6kb2;Rps6kb1	4.14812	3.60272	0.000176991	11.2344	11.5437	10.8778	15.4376	15.2959	NaN	No	Yes	23.7895	0.005988	1.2858	1	1	1	1	1	1	1	0	D6RH86;E9PUN3;D3YWB8;Q9Z1M4;Q8BSK8	D6RH86;E9PUN3;D3YWB8;Q9Z1M4;Q8BSK8	Ribosomal protein S6 kinase beta-2;Ribosomal protein S6 kinase beta-1
Snx27	4.14639	1.98951	0.00036131	9.63223	12.0602	NaN	15.2485	14.9377	14.7916	No	Yes	22.0547	0	16.22	5	3	1	2	0	3	3	1	Q3UHD6;A0A0G2JG07;A0A0G2JF85	Q3UHD6	Sorting nexin-27
Bcs1l	4.14627	2.90263	0.000108949	10.5277	10.8296	9.22745	14.127	13.8395	15.0571	No	Yes	21.928	0	7.9745	5	3	2	2	1	3	2	3	Q9CZP5	Q9CZP5	Mitochondrial chaperone BCS1
Prim2	4.14506	4.68443	0.000327103	NaN	8.87902	8.66614	12.837	12.8827	13.0332	No	Yes	20.2175	0	3.377	5	2	0	1	1	2	2	2	P33610	P33610	DNA primase large subunit
Tlr3	4.14475	2.52373	0.000116869	12.5794	12.4912	10.3285	15.8027	15.5938	16.4368	No	Yes	21.3369	0	9.1105	14	6	4	3	2	5	5	6	Q99MB1;A0A1B0GSY9;A0A1B0GS40	Q99MB1	Toll-like receptor 3
H2-DMa	4.14441	4.13474	0.000337349	14.501	14.8285	14.4884	18.5041	18.4536	19.2935	No	Yes	28.2908	0	18.13	13	4	1	2	1	3	4	4	Q31621;P28078	Q31621;P28078	Class II histocompatibility antigen, M alpha chain
Nfkb1	4.14434	4.39421	0.000242424	12.6074	12.7281	12.627	16.6079	16.4941	17.2937	No	Yes	22.4483	0	15.736	12	7	3	3	4	6	6	7	P25799;A0A0G2JGK6	P25799	Nuclear factor NF-kappa-B p105 subunit;Nuclear factor NF-kappa-B p50 subunit
Arfgef2	4.14433	4.34038	0.000235294	9.20564	9.45747	9.50953	13.508	13.1284	13.9692	Yes	Yes	18.9629	0	4.0774	1	1	1	0	0	1	1	1	A2A5R2	A2A5R2	Brefeldin A-inhibited guanine nucleotide-exchange protein 2
Pum2	4.1435	1.77909	0.000454172	8.9517	6.4342	8.93075	NaN	11.9176	12.5805	Yes	Yes	18.7381	0.0057381	1.3015	1	1	0	0	0	0	1	1	Q3TQ29;Q3UR91;Q80U58	Q3TQ29;Q3UR91;Q80U58	Pumilio homolog 2
Pip4k2c	4.14206	2.35419	0.000152143	10.2902	11.5979	NaN	14.6082	14.8445	15.8056	No	Yes	21.2339	0	5.2947	4	2	1	2	0	2	2	2	Q91XU3	Q91XU3	Phosphatidylinositol 5-phosphate 4-kinase type-2 gamma
Xrcc5	4.14136	2.50749	0.000140998	8.98447	NaN	9.4747	12.6043	13.3721	14.1364	No	Yes	20.195	0	2.6434	4	2	1	0	1	1	2	2	P27641	P27641	X-ray repair cross-complementing protein 5
Phf6	4.13946	4.72522	0.000307692	12.3351	12.2411	11.8383	16.0688	16.2162	16.5479	No	Yes	23.4541	0	16.663	7	4	2	2	2	4	4	4	E9QAG2;Q9D4J7	E9QAG2;Q9D4J7	PHD finger protein 6
Ktn1	4.13794	1.89396	0.000436494	11.6905	7.96311	9.99317	14.4502	13.0056	14.6048	No	Yes	19.7346	0	3.5835	5	4	2	1	2	3	2	3	A0A087WQF8;A0A087WP48;F8VQC7;A0A087WPX0;A0A087WP14;A0A087WP85;A0A087WRS1;A0A087WQQ5;A0A087WQ25;A0A087WS23;A0A087WPW5;A0A087WQI3;A0A087WNW3;A0A087WQD0;A0A087WQG4;A0A087WS29;A0A087WS04;Q61595	A0A087WQF8;A0A087WP48;F8VQC7;A0A087WPX0;A0A087WP14;A0A087WP85;A0A087WRS1;A0A087WQQ5;A0A087WQ25;A0A087WS23;A0A087WPW5;A0A087WQI3;A0A087WNW3;A0A087WQD0;A0A087WQG4;A0A087WS29;A0A087WS04;Q61595	Kinectin
Akt2	4.13791	3.36528	0.000163934	9.48241	9.37934	9.72339	14.5445	13.4054	13.0489	No	Yes	20.9384	0.0064935	1.2679	3	2	1	1	1	2	2	1	Q60823;F8WHG5	Q60823;F8WHG5	RAC-beta serine/threonine-protein kinase
Impa2	4.13263	4.20405	0.000203046	10.1918	10.1911	10.0154	14.7821	13.8429	14.1713	No	Yes	22.652	0	2.5089	3	2	1	1	1	2	2	2	Q91UZ5	Q91UZ5	Inositol monophosphatase 2
Ppt1	4.13071	2.78239	9.60219e-05	16.6329	17.9784	15.8562	20.7108	20.7506	21.3982	No	Yes	28.543	0	82.523	47	9	6	6	5	6	9	9	O88531;B1B0P8;B1B0P9	O88531;B1B0P8;B1B0P9	Palmitoyl-protein thioesterase 1
Asprv1	4.13066	2.18026	0.000223881	10.8868	9.16257	7.7386	14.0508	13.2391	12.8901	Yes	Yes	20.032	0	9.1563	5	1	0	0	1	1	1	1	Q09PK2	Q09PK2	Retroviral-like aspartic protease 1
Camk2d	4.13059	3.62788	0.000211161	15.2737	15.7547	14.7877	19.2894	18.9859	19.9324	No	Yes	26.5359	0	93.61	42	11	7	7	5	11	11	11	Q6PHZ2;A0A0G2JGS4;E9Q1T1;E9Q1W0;E9Q1V9;Q8CCM0;E9PXV3;F6RWZ9;E9QAJ4;Q5SVI3;Q5SVI1;Q68EG2;Q5SVI2;Q5SVI0;F8WIS9;Q5SVJ1;D6RDQ8;Q5SVI9;Q5SVJ0;P11798;P28652;F6WHR9	Q6PHZ2;A0A0G2JGS4;E9Q1T1;E9Q1W0;E9Q1V9;Q8CCM0	Calcium/calmodulin-dependent protein kinase type II subunit delta
Map1s	4.12975	3.45221	0.000177665	11.5815	11.0047	12.2477	15.8928	15.2509	16.0793	No	Yes	22.2882	0	16.665	10	5	2	1	4	5	4	4	A0A1D5RLY6;Q8C052	A0A1D5RLY6;Q8C052	Microtubule-associated protein 1S;MAP1S heavy chain;MAP1S light chain
Pin4	4.12925	2.60943	8.22562e-05	11.1269	12.4398	9.92377	15.0968	15.4608	15.3207	No	Yes	24.1134	0	10.168	4	2	1	2	1	1	2	1	Q9CWW6	Q9CWW6	Peptidyl-prolyl cis-trans isomerase NIMA-interacting 4
Igkv12-38	4.12824	2.2381	0.000211724	8.65976	8.0464	9.89308	NaN	13.3305	12.6588	Yes	Yes	22.7212	0	4.1338	1	1	0	0	0	0	1	1	A0A075B5M8;A0A0G2JEI7	A0A075B5M8;A0A0G2JEI7
Gpd1l	4.12783	3.26304	0.000147524	13.8027	14.7334	13.7615	18.6643	17.4828	18.534	No	Yes	25.574	0	16.328	25	8	4	5	4	8	6	8	Q3ULJ0;D3Z0L6	Q3ULJ0	Glycerol-3-phosphate dehydrogenase 1-like protein
Txndc12	4.1274	2.5121	0.000140162	10.8978	11.5883	9.74148	14.5677	14.0773	15.9648	No	Yes	22.9573	0	3.6131	3	3	1	1	1	2	2	3	Q9CQU0	Q9CQU0	Thioredoxin domain-containing protein 12
Srpr	4.1272	2.61596	8.23045e-05	NaN	11.5754	11.5609	15.2057	16.5401	15.3402	No	Yes	21.9925	0	14.856	8	6	0	2	2	4	5	3	Q9DBG7;F6VF36	Q9DBG7;F6VF36	Signal recognition particle receptor subunit alpha
Znf512	4.12596	2.79394	9.71548e-05	12.8211	10.8059	12.1302	15.7258	15.8108	16.5985	No	Yes	23.2551	0	7.1784	12	4	3	1	3	3	4	4	A0A0J9YTU9;Q69Z99;A0A0J9YU29;A0A0J9YTW0;A0A0J9YV10	A0A0J9YTU9;Q69Z99;A0A0J9YU29;A0A0J9YTW0	Zinc finger protein 512
Nub1	4.12555	2.3637	0.000151486	9.86754	9.27894	12.0282	14.2009	14.4588	14.8916	No	Yes	20.3843	0	4.7784	8	3	1	1	2	3	3	3	A0A0G2JGQ4;P54729	A0A0G2JGQ4;P54729	NEDD8 ultimate buster 1
Rabep2	4.12441	2.84829	0.000102264	12.5599	12.4196	11.5925	16.9536	15.2105	16.7812	No	Yes	23.5303	0	8.6858	7	5	2	2	1	5	3	3	Q91WG2;D6RGR2;D6RCU7	Q91WG2	Rab GTPase-binding effector protein 2
Cd5l	4.12248	4.16727	0.000338983	12.8657	12.6314	12.4357	16.3346	16.7373	17.2283	No	Yes	24.4811	0	5.7685	6	5	3	2	3	3	5	4	Q9QWK4	Q9QWK4	CD5 antigen-like
Eea1	4.1204	4.31181	0.000219178	14.3327	14.3204	14.1476	18.1699	18.0935	18.8985	No	Yes	23.6585	0	65.592	35	22	8	10	10	19	18	20	Q8BL66	Q8BL66	Early endosome antigen 1
Strn4	4.1202	2.2785	0.000160285	10.2667	10.9851	8.10248	14.1035	13.3647	14.2467	No	Yes	21.1089	0	2.3362	2	2	1	2	1	2	2	2	P58404;V9GXE7;V9GXI9	P58404	Striatin-4
Plaa	4.11858	3.8563	0.00025974	13.5434	13.2248	13.6261	17.7816	16.9548	18.0137	No	Yes	23.8562	0	44.337	20	11	6	5	6	10	7	9	P27612;F7D1R5	P27612	Phospholipase A-2-activating protein
Dnpep	4.11773	4.28555	0.000212202	12.9375	13.3516	13.0631	17.2805	16.8029	17.622	No	Yes	24.7555	0	59.307	16	6	4	4	4	6	6	6	Q3TVK3;Q9Z2W0;Q8BPW9;A0A087WS31;A0A087WSE6	Q3TVK3;Q9Z2W0;Q8BPW9	Aspartyl aminopeptidase
Atp6v1g1	4.11756	3.60484	0.000202312	15.7328	16.0137	14.8062	19.3298	19.6979	19.8778	No	Yes	27.9197	0	76.663	34	8	5	4	3	7	8	8	Q9CR51	Q9CR51	V-type proton ATPase subunit G 1
Tuft1	4.11733	2.62681	8.26934e-05	9.89958	9.19404	10.1267	NaN	13.3176	14.3973	Yes	Yes	21.3341	0.0082645	1.2295	0	1	0	0	0	0	1	1	A0A0G2JDW8;O08970	A0A0G2JDW8;O08970	Tuftelin
Nat10	4.1147	2.41623	0.000156281	11.5234	12.0906	9.42981	15.3482	14.7769	15.2629	No	Yes	21.2568	0	13.229	7	4	2	3	1	4	4	4	Q8K224	Q8K224	N-acetyltransferase 10
B4galnt1	4.11152	4.19475	0.000344828	12.9468	12.5952	12.1777	16.9045	16.3443	16.8056	No	Yes	23.66	0	33.954	19	9	5	4	4	9	8	8	Q09200;A0A1W2P6F0	Q09200;A0A1W2P6F0	Beta-1,4 N-acetylgalactosaminyltransferase 1
Dnase2a;Dnase2	4.11096	3.651	0.00021148	15.1196	15.6694	14.4972	18.8568	19.2597	19.5027	No	Yes	27.3238	0	25.128	19	8	4	5	3	6	8	7	D3Z512;P56542;D3Z5U3;S4R1G0	D3Z512;P56542;D3Z5U3	Deoxyribonuclease-2-alpha
Pgm1;Pgm2	4.11044	3.53745	0.000190996	14.7152	15.0696	14.056	18.6542	18.2619	19.256	No	Yes	24.9482	0	37.734	37	13	8	10	6	13	12	12	Q9D0F9;A2CEK3	Q9D0F9;A2CEK3	Phosphoglucomutase-1
Klc4	4.10698	4.28104	0.000209974	10.1541	10.2879	10.0667	14.4253	13.7716	14.6327	No	Yes	21.1711	0	2.341	3	1	1	1	1	1	1	1	Q9DBS5	Q9DBS5	Kinesin light chain 4
Arpc3	4.10546	3.94202	0.000271845	17.2615	17.4404	16.6322	21.0259	20.9789	21.6456	No	Yes	29.3767	0	43.291	53	9	5	7	5	7	6	7	Q9JM76;H7BWZ3;A0A0G2JFK7;D3Z2F7;D3Z2F8	Q9JM76;H7BWZ3;A0A0G2JFK7;D3Z2F7;D3Z2F8	Actin-related protein 2/3 complex subunit 3
Cmpk1	4.1047	3.79348	0.000241379	15.5043	16.2721	15.2918	19.7438	19.4852	20.1533	No	Yes	27.8384	0	58.736	45	9	5	7	6	8	9	8	Q9DBP5;A0A0R4J093	Q9DBP5;A0A0R4J093	UMP-CMP kinase
G6pdx	4.10458	4.10624	0.000319635	17.5601	17.7245	17.0698	21.8115	21.1157	21.741	No	Yes	28.4493	0	99.754	95	26	21	22	18	26	23	25	Q00612;A3KG36;G3UWD6;P97324	Q00612;A3KG36	Glucose-6-phosphate 1-dehydrogenase X;Glucose-6-phosphate 1-dehydrogenase
Ddx5	4.10449	3.67769	0.000215054	18.2492	18.837	17.72	22.1193	22.2273	22.7731	No	Yes	29.1598	0	135.13	139	26	21	24	21	25	25	25	Q8BTS0;Q61656;S4R1I6;B1ARB9;B1ARC0;S4R1E3	Q8BTS0;Q61656;S4R1I6	Probable ATP-dependent RNA helicase DDX5
Marcksl1	4.10325	3.64471	0.000208024	13.74	13.8926	13.0793	17.9943	17.0798	17.9475	No	Yes	26.9671	0	10.021	9	2	2	2	2	2	2	2	P28667	P28667	MARCKS-related protein
Pcx;Pc	4.10298	2.48322	0.000164841	11.1591	12.3751	10.8287	15.332	14.5857	16.7542	No	Yes	20.7503	0	22.494	12	9	3	4	2	5	5	9	G5E8R3;E9QPD7;Q05920;A0A286YCC5;A0A494B912	G5E8R3;E9QPD7;Q05920	Pyruvate carboxylase;Pyruvate carboxylase, mitochondrial
Mrpl41	4.10265	3.52628	0.00018617	11.8491	12.4587	11.9023	15.6492	15.9866	16.8824	No	Yes	25.38	0	13.029	13	4	2	3	2	4	4	4	Q9CQN7	Q9CQN7	39S ribosomal protein L41, mitochondrial
Tpcn2	4.10052	3.10499	0.000125786	9.59686	9.96167	9.33595	12.7512	14.017	14.4278	No	Yes	21.884	0	9.2006	5	2	1	1	1	1	2	2	A0A140LJI3;A0A140LJE2;A0A140LIA1;A0A140LHT5;Q8BWC0	A0A140LJI3;A0A140LJE2;A0A140LIA1;A0A140LHT5;Q8BWC0	Two pore calcium channel protein 2
Nhp2l1	4.09946	4.22598	0.000199005	16.2794	16.7526	15.9121	20.3337	20.2414	20.6673	No	Yes	29.1315	0	47.29	39	9	6	6	6	9	9	8	Q9D0T1	Q9D0T1	NHP2-like protein 1;NHP2-like protein 1, N-terminally processed
Aldh9a1	4.09829	4.10217	0.000315315	16.1132	16.8334	16.4101	20.514	20.2066	20.9309	No	Yes	27.6021	0	69.967	76	19	9	15	9	18	17	19	Q9JLJ2;Q3U367	Q9JLJ2;Q3U367	4-trimethylaminobutyraldehyde dehydrogenase
Txndc17	4.09483	4.2494	0.000201511	13.2648	13.7212	13.3026	17.2299	17.3684	17.9748	No	Yes	26.866	0	2.3068	5	1	1	1	1	1	1	1	Q9CQM5	Q9CQM5	Thioredoxin domain-containing protein 17
Aldh3b1	4.09456	3.85008	0.000251346	14.9796	15.3089	14.4547	18.9867	18.6112	19.4289	No	Yes	26.2453	0	44.543	42	10	8	8	6	10	10	10	Q80VQ0;J3QMK6;E9Q3E1;F6QPV9	Q80VQ0	Aldehyde dehydrogenase family 3 member B1
Rnf114	4.09415	2.34184	0.000148776	12.3611	NaN	10.8707	15.9077	15.1187	16.1036	No	Yes	21.3978	0	6.6384	6	3	1	0	1	3	3	3	Q9ET26;S4R1Z0	Q9ET26	E3 ubiquitin-protein ligase RNF114
Rpl23a	4.09405	3.58021	0.000193906	17.2602	17.7507	16.4662	21.0588	21.157	21.5435	No	Yes	30.3404	0	25.904	45	10	7	7	7	10	10	8	P62751	P62751	60S ribosomal protein L23a
Rcc2	4.09048	3.39499	0.00016185	16.4581	16.1533	15.3076	19.508	20.2062	20.4762	No	Yes	26.6701	0	219.47	76	17	9	12	9	14	17	15	Q8BK67;A2AWQ2	Q8BK67	Protein RCC2
Pla2g4a	4.08909	2.65208	8.3682e-05	12.6097	14.952	13.9617	17.7383	17.7222	18.3302	No	Yes	24.8621	0	8.3871	13	6	3	6	2	6	6	6	Q9DBX5;P47713	Q9DBX5;P47713	Cytosolic phospholipase A2;Phospholipase A2;Lysophospholipase
Uchl3;Uchl4	4.08903	2.52989	0.000140086	13.6169	14.5786	12.0953	17.3632	17.1859	18.0088	No	Yes	25.2658	0	35.155	20	6	2	5	1	5	6	6	Q9JKB1;A0A2I3BQ39;P58321	Q9JKB1;A0A2I3BQ39;P58321	Ubiquitin carboxyl-terminal hydrolase isozyme L3;Ubiquitin carboxyl-terminal hydrolase isozyme L4
Nrf1	4.08835	2.75308	9.07323e-05	10.4663	12.7003	11.8296	16.0096	15.7025	15.5491	No	Yes	24.0696	0	5.5977	8	3	1	2	2	3	3	2	Q99K73;G3XA39;D3Z3B4;E9Q7X0;Q3UXF4;Q9WU00;D3YV66	Q99K73;G3XA39;D3Z3B4;E9Q7X0;Q3UXF4;Q9WU00	Nuclear respiratory factor 1
Tsc22d4	4.08554	2.22693	0.000207103	9.8481	10.7281	NaN	15.3887	13.6965	14.0357	No	Yes	23.5422	0	16.581	2	3	1	1	0	3	2	2	F6VXN4;D3YZZ4;Q9EQN3	F6VXN4;D3YZZ4;Q9EQN3	TSC22 domain family protein 4
Dbnl	4.0841	2.90423	0.000105342	16.4028	16.1943	14.7321	20.2658	19.281	20.0347	No	Yes	27.4491	0	101.48	38	12	5	8	5	10	11	9	Q62418	Q62418	Drebrin-like protein
Stat3	4.08372	2.66065	8.39832e-05	12.0148	14.0485	11.9842	16.8029	16.462	17.0338	No	Yes	21.2886	0	26.79	11	7	2	6	2	6	5	5	P42227;B7ZC18	P42227;B7ZC18	Signal transducer and activator of transcription 3;Signal transducer and activator of transcription
Hmgb2	4.08187	4.71881	0.000280702	18.8932	18.6705	18.5196	22.6732	22.5382	23.1176	No	Yes	31.2343	0	34.792	52	7	5	6	6	7	7	7	P30681;A0A1B0GQX9	P30681	High mobility group protein B2
Tbc1d5	4.08119	3.29648	0.000146444	7.88526	8.14833	9.13552	12.3458	12.0523	13.0146	Yes	Yes	19.4344	0	25.13	3	1	0	0	0	1	1	1	A0A286YDB3;Q80XQ2	A0A286YDB3;Q80XQ2	TBC1 domain family member 5
Nipsnap3b	4.07934	2.31663	0.000143246	12.7998	14.3802	11.5075	17.0276	16.4644	17.4336	No	Yes	25.3788	0	30.173	16	3	2	2	2	3	3	3	B1AWZ5;Q9CQE1	B1AWZ5;Q9CQE1	Protein NipSnap homolog 3B
Pcyox1	4.07883	2.50235	0.000165705	13.09	15.219	12.8954	17.6913	17.5047	18.2448	No	Yes	24.6818	0	41.541	26	7	3	7	2	6	6	6	Q9CQF9;F7CIP8;A0A0N4SWD3;D3Z275	Q9CQF9;F7CIP8	Prenylcysteine oxidase
Fus	4.07598	3.71673	0.000216718	15.7154	15.768	14.8637	19.284	19.3163	19.9747	No	Yes	27.2715	0	78.768	46	11	5	4	4	10	11	11	Q8CFQ9;P56959;G3UXT7;G3UZD2;Q91VQ2;F6QCI0;Q8BQ46	Q8CFQ9;P56959;G3UXT7	RNA-binding protein FUS
Sephs1	4.07594	3.49968	0.000176545	12.8849	12.729	11.7655	16.4977	16.1532	16.9563	No	Yes	24.4962	0	49.361	16	6	3	3	2	6	6	6	Q8BH69	Q8BH69	Selenide, water dikinase 1
Ntpcr	4.07573	2.64243	8.25959e-05	10.0893	10.9614	11.1069	15.9821	14.5899	13.8127	No	Yes	23.036	0	9.8435	7	4	1	2	2	4	3	2	D3YXL1;Q9CQA9;Q8C373;D3Z2W9	D3YXL1;Q9CQA9;Q8C373;D3Z2W9	Cancer-related nucleoside-triphosphatase homolog
Apex1	4.07282	3.59256	0.000193103	14.4046	15.1752	14.0127	18.7921	18.1974	18.8216	No	Yes	26.6475	0	58.034	23	5	4	4	4	5	5	4	P28352;F6QA74;D3Z124;D3Z6R9	P28352;F6QA74;D3Z124;D3Z6R9	DNA-(apurinic or apyrimidinic site) lyase;DNA-(apurinic or apyrimidinic site) lyase, mitochondrial
Auh	4.07038	2.80776	9.26539e-05	NaN	11.1133	10.6312	14.8492	14.4216	15.5571	No	Yes	22.904	0	3.7985	7	2	0	1	1	2	2	2	A0A0R4J023;Q9JLZ3;E9Q6L3;A0A0R4J1L8;E9QMT1;F6RT60	A0A0R4J023;Q9JLZ3;E9Q6L3;A0A0R4J1L8;E9QMT1;F6RT60	Methylglutaconyl-CoA hydratase, mitochondrial
Ifitm3;Ifitm2	4.07013	2.6781	8.449e-05	13.029	15.2152	14.0155	18.5846	17.6194	18.2661	No	Yes	28.1591	0.00056915	2.0467	9	2	1	2	1	2	2	2	Q9CQW9;A0A1B0GT68;Q99J93	Q9CQW9;A0A1B0GT68;Q99J93	Interferon-induced transmembrane protein 3;Interferon-induced transmembrane protein 2
Diap1;Diaph1	4.07	4.01271	0.00027668	14.9235	14.9101	14.0872	18.7562	18.4483	18.9263	No	Yes	24.4109	0	41.95	46	21	11	14	8	18	20	20	E9PXV7;E9PV41;O08808;F6XC54;D3Z074	E9PXV7;E9PV41;O08808;F6XC54;D3Z074	Protein diaphanous homolog 1
Irf8	4.06904	3.7275	0.000217729	10.5827	11.3858	10.5111	14.8877	14.4907	15.3083	No	Yes	22.4275	0	10.802	4	3	2	2	1	3	3	3	P23611;F7C1A3;E0CZE4	P23611;F7C1A3	Interferon regulatory factor 8
Ahcyl2	4.06879	2.20944	0.000225658	10.9537	13.7209	13.2477	16.2332	16.4111	17.4843	No	Yes	22.7698	0	23.093	15	5	1	3	2	4	4	5	F8WGT1;Q68FL4;F8WI65;H3BKT5;E9PX77;D3YX97;H3BL31;D3YYM7	F8WGT1;Q68FL4;F8WI65;H3BKT5	Adenosylhomocysteinase;Putative adenosylhomocysteinase 3
Snf8	4.06787	4.71669	0.000275862	11.8004	11.595	11.8203	15.9401	15.427	16.0522	No	Yes	25.0978	0	14.203	9	3	2	1	2	3	3	3	A2A6M1;Q9CZ28	A2A6M1;Q9CZ28	Vacuolar-sorting protein SNF8
Ankrd44	4.0677	3.02243	0.000115416	12.7592	13.7316	12.2422	16.6325	16.6257	17.678	No	Yes	22.2581	0	8.8022	15	7	2	5	2	5	6	7	E9QNQ2;B2RXR6;J3QK13;J3QK37;J3QNJ4	E9QNQ2;B2RXR6;J3QK13	Serine/threonine-protein phosphatase 6 regulatory ankyrin repeat subunit B
Arglu1	4.0677	3.89325	0.000254083	14.3889	15.213	14.2513	18.5346	18.5519	18.9699	No	Yes	27.4889	0	4.5906	9	4	3	4	3	3	3	3	A0A140LIS5;Q3UL36	A0A140LIS5;Q3UL36	Arginine and glutamate-rich protein 1
Hspa14	4.06644	4.03734	0.00028169	12.5383	11.9691	11.5519	16.2698	15.8991	16.0898	No	Yes	23.2447	0	18.425	13	6	5	3	2	6	6	6	Q99M31	Q99M31	Heat shock 70 kDa protein 14
Ddx17	4.06626	3.62702	0.000197461	15.7224	16.5577	15.515	19.714	19.8429	20.437	No	Yes	26.4287	0	56.277	42	14	10	12	10	13	14	11	Q501J6;Q3U741;Q3TU25	Q501J6;Q3U741;Q3TU25	Probable ATP-dependent RNA helicase DDX17
Rtcb	4.06484	4.00983	0.00027451	15.4074	15.4299	14.7396	19.2516	18.893	19.6268	No	Yes	25.8582	0	84.758	63	20	12	11	9	19	17	17	Q99LF4	Q99LF4	tRNA-splicing ligase RtcB homolog
Gbp9	4.06289	3.54897	0.000183007	14.5769	14.9094	13.814	18.1173	18.4149	18.9568	No	Yes	24.8064	0	40.964	39	9	5	7	3	9	9	9	Q8BTS3;A9YVJ5;Q000W5;L7N1X8;A0A0G2JDV3;A4UUI3	Q8BTS3
Tradd	4.06229	1.83862	0.000462879	9.34705	11.8999	NaN	14.3304	14.4361	15.2909	No	Yes	21.8385	0	5.5984	5	2	1	2	0	2	2	2	Q3U0V2	Q3U0V2	Tumor necrosis factor receptor type 1-associated DEATH domain protein
Itgal	4.06114	3.50663	0.000176101	14.4431	15.14	13.892	18.5491	18.1932	18.9162	No	Yes	24.3089	0	94.039	33	14	6	9	5	12	11	13	E9QNL8;E9Q5M7;D3Z627;P24063;D3YW95	E9QNL8;E9Q5M7;D3Z627;P24063;D3YW95	Integrin alpha-L
Larp7	4.05979	4.62972	0.0002589	12.9361	13.0832	13.0036	16.796	16.9223	17.484	No	Yes	24.1435	0	22.941	16	7	5	5	6	6	7	7	Q05CL8;A2AMD0	Q05CL8	La-related protein 7
Ltf	4.05958	3.64565	0.000199147	20.1333	20.309	19.6949	24.7696	23.6684	23.8779	No	Yes	30.2689	0	323.31	279	47	35	35	32	43	43	45	P08071;A0A0G2JGN1;A0A0G2JEA3;A0A0G2JFM6;A0A0G2JDN0;A0A0G2JGX1	P08071	Lactotransferrin
Dimt1	4.0586	2.49736	0.000164156	NaN	10.8818	9.41284	13.859	14.4216	14.3371	No	Yes	24.7896	0	3.6298	3	1	0	1	1	1	1	1	A0A286YCE5;Q9D0D4	A0A286YCE5;Q9D0D4	Probable dimethyladenosine transferase
Rab3d	4.05771	3.49526	0.000174129	12.3918	12.0033	11.0191	16.0362	15.7063	15.8449	No	Yes	24.1162	0	18.082	10	3	2	2	1	3	3	3	P35276;D3YWL1;D3YW33	P35276;D3YWL1;D3YW33	Ras-related protein Rab-3D
Vwa1	4.05753	2.37664	0.00015062	9.53781	11.0422	9.95172	13.8303	14.6393	NaN	No	Yes	21.9039	0	3.4026	3	2	1	2	1	1	2	1	Q8R2Z5	Q8R2Z5	von Willebrand factor A domain-containing protein 1
Fmnl1	4.05746	4.11436	0.000302376	15.3843	16.0535	15.507	19.8461	19.3001	19.9711	No	Yes	25.419	0	100.98	75	19	11	12	12	19	18	19	A0A1W2P6X3;Q9JL26;A2AB60;G3UWI1	A0A1W2P6X3;Q9JL26;A2AB60	Formin-like protein 1
Aldh1l1	4.05524	2.64565	8.17757e-05	10.3701	10.2431	NaN	14.2062	13.7506	15.1287	No	Yes	22.0012	0.0002876	2.1401	3	1	1	1	0	1	1	1	A0A0N4SW56;Q8R0Y6	A0A0N4SW56;Q8R0Y6	Cytosolic 10-formyltetrahydrofolate dehydrogenase
Pole3	4.05515	4.84233	0.000300752	10.4868	11.0376	10.5811	14.9168	14.7306	14.6235	No	Yes	23.6941	0	23.894	7	2	1	2	1	2	2	2	Q9JKP7;A0A0R4J091;D6RDT4	Q9JKP7;A0A0R4J091;D6RDT4	DNA polymerase epsilon subunit 3
H2-DMb1	4.05483	3.01853	0.000109632	NaN	12.2848	12.6508	16.4055	16.0998	17.0626	No	Yes	24.1072	0.0049961	1.3662	6	1	0	1	1	1	1	1	Q31094;P35737	Q31094;P35737	Class II histocompatibility antigen, M beta 1 chain
Gpatch4	4.05429	2.25253	0.000206926	10.7881	8.84157	7.92799	12.5609	13.5387	13.621	Yes	Yes	20.9209	0	4.4799	1	1	0	0	0	1	1	1	Q3TFK5	Q3TFK5	G patch domain-containing protein 4
Trim56	4.05322	3.42435	0.000160367	8.90198	8.70632	8.97677	12.0788	13.1608	13.5051	Yes	Yes	19.7736	0.0094775	1.1783	2	1	0	1	0	1	1	1	A0A0R4J0Q6;Q80VI1	A0A0R4J0Q6;Q80VI1	E3 ubiquitin-protein ligase TRIM56
Gltp	4.05266	3.14897	0.000126468	15.0753	14.8718	13.7255	18.5487	18.1251	19.1568	No	Yes	25.3053	0	16.137	12	5	2	2	1	5	3	4	Q9JL62;D3Z1H9;D3Z1H8	Q9JL62;D3Z1H9;D3Z1H8	Glycolipid transfer protein
Paf1	4.0503	2.32122	0.000162016	11.2984	9.38533	8.45284	14.2057	13.634	13.4477	Yes	Yes	20.3382	0	7.1923	3	3	0	0	0	3	3	2	Q8K2T8	Q8K2T8	RNA polymerase II-associated factor 1 homolog
Lpxn	4.04875	2.50449	0.000163985	12.3151	12.3935	10.1433	15.5288	15.3698	16.0995	No	Yes	20.8325	0	16.149	9	4	3	2	1	4	4	4	Q99N69;A0A494B990	Q99N69;A0A494B990	Leupaxin
Napsa	4.0484	2.34769	0.000145354	13.6834	13.5553	12.8704	18.3757	18.0803	15.7983	No	Yes	26.1451	0	45.843	14	3	2	2	1	3	3	3	O09043	O09043	Napsin-A
Gfm2	4.04703	4.04488	0.000277228	10.4099	10.3737	9.81107	14.4273	13.7843	14.5241	No	Yes	21.5379	0	2.2749	3	1	1	1	1	1	1	1	Q8C1C2;E9Q7N5;Q8R2Q4	Q8C1C2;E9Q7N5;Q8R2Q4	Ribosome-releasing factor 2, mitochondrial
Eftud1	4.04554	2.76887	8.90019e-05	NaN	9.69099	10.385	14.3557	13.4673	14.4276	No	Yes	20.5043	0	7.4616	4	3	0	1	1	3	2	2	Q8C0D5	Q8C0D5	Elongation factor Tu GTP-binding domain-containing protein 1
Ccdc47	4.04542	4.0481	0.000277778	14.2739	13.5634	13.8382	17.6646	17.7752	18.372	No	Yes	24.7455	0	33.687	29	10	5	7	4	9	9	9	Q9D024;F7C265;B1AR93	Q9D024;F7C265	Coiled-coil domain-containing protein 47
Cstb	4.04429	3.65686	0.00019802	15.6671	16.3505	15.3924	19.4571	19.7689	20.3169	No	Yes	28.4343	0	24.888	32	6	4	5	4	6	6	6	Q62426	Q62426	Cystatin-B
Golga7	4.04304	1.49622	0.000917284	12.4138	10.2694	7.26066	14.7187	14.3999	12.9545	Yes	Yes	23.1226	0	7.0646	5	2	0	1	0	2	2	2	Q91W53	Q91W53	Golgin subfamily A member 7
Cln5	4.04112	5.8199	0	12.6739	12.9972	12.7724	16.7909	16.8226	16.9534	No	Yes	24.5191	0	8.15	10	3	2	3	2	3	3	3	Q3UMW8	Q3UMW8	Ceroid-lipofuscinosis neuronal protein 5 homolog
Cd5	4.0402	5.77434	0	11.4315	11.4356	11.3003	15.5204	15.2269	15.5406	No	Yes	23.0722	0.0034918	1.5635	5	2	1	1	1	2	2	2	A0A494BB49;P13379	A0A494BB49;P13379	T-cell surface glycoprotein CD5
Stk10	4.03881	4.16574	0.000309735	15.136	15.632	14.8039	19.0867	19.0811	19.5206	No	Yes	24.9608	0	51.184	43	14	11	12	9	14	13	12	O55098	O55098	Serine/threonine-protein kinase 10
Ly6g	4.03757	2.33212	0.000144424	10.8915	11.6835	NaN	16.2536	14.7427	14.979	No	Yes	24.9863	0	5.9951	2	1	1	1	0	1	1	1	A0A668H4Q1;P35461	A0A668H4Q1;P35461	Lymphocyte antigen 6G
Pfas	4.03683	3.7806	0.000221519	13.9507	13.3484	12.9565	17.6134	17.0553	17.6973	No	Yes	22.7182	0	48.015	26	14	7	4	3	12	12	11	Q5SUR0;F6RUL9;G3UY86	Q5SUR0	Phosphoribosylformylglycinamidine synthase
Slc1a5	4.03673	3.88785	0.000243902	11.5942	11.1935	11.0692	15.7309	14.7605	15.4757	No	Yes	23.0989	0	2.8939	4	2	2	1	2	1	1	1	Q9ESU7;P51912	Q9ESU7;P51912	Amino acid transporter;Neutral amino acid transporter B(0)
Rhoa	4.03501	4.31113	0.000343137	15.6701	15.9475	15.3618	19.7599	19.3295	19.9951	No	Yes	28.76	0	5.1342	17	4	4	3	2	4	4	3	Q9QUI0;A0A0A6YXF6	Q9QUI0;A0A0A6YXF6	Transforming protein RhoA
Plcg2	4.03158	3.58128	0.000182768	15.0993	15.7848	14.7253	19.2882	18.7842	19.6318	No	Yes	24.9814	0	178.65	81	25	13	17	14	22	21	24	Q8CIH5	Q8CIH5	1-phosphatidylinositol 4,5-bisphosphate phosphodiesterase gamma-2
Agps	4.03128	2.94268	0.000105422	12.9791	13.14	11.4259	16.4611	16.2496	16.9281	No	Yes	23.19	0	24.011	17	6	3	4	1	6	6	6	H3BKN2;A2AL50;Q8C0I1;A2AL49;H3BIY5	H3BKN2;A2AL50;Q8C0I1;A2AL49	Alkyldihydroxyacetonephosphate synthase, peroxisomal
Herc4	4.03056	3.18648	0.000128323	11.0479	12.5475	11.3142	15.6294	15.349	16.0229	No	Yes	20.27	0	15.394	5	3	1	2	1	3	3	3	Q6PAV2	Q6PAV2	Probable E3 ubiquitin-protein ligase HERC4
Srgap2	4.02826	2.6255	0.000121074	11.2191	11.4929	9.37229	14.8207	14.2613	15.0871	No	Yes	23.9772	0	12.806	4	3	1	2	1	3	3	3	A0A087WRV4;A0A087WNM1;Q91Z67;A0A087WNR5;D3YZW1;Q91Z69	A0A087WRV4;A0A087WNM1;Q91Z67	SLIT-ROBO Rho GTPase-activating protein 2
Unc13d	4.02825	2.35995	0.000145689	12.8768	12.6383	10.3218	15.7554	15.7719	16.3943	No	Yes	21.7763	0	63.515	15	6	2	5	1	6	6	6	B2RUP2;A0A0R4J257;A2A855;A2A858	B2RUP2;A0A0R4J257	Protein unc-13 homolog D
Pcmt1	4.02198	3.22998	0.00013346	13.6803	14.7474	13.3503	17.9441	17.5259	18.374	No	Yes	25.2701	0	57.984	24	8	3	6	2	8	8	8	F7D432;E9PWE0;E0CYV0;P23506;F6V9F1;F6TXE3	F7D432;E9PWE0;E0CYV0;P23506;F6V9F1	Protein-L-isoaspartate O-methyltransferase;Protein-L-isoaspartate(D-aspartate) O-methyltransferase
Gsdmdc1	4.02027	3.10441	0.000120586	12.2079	13.5899	13.7666	17.4713	16.855	17.2991	No	Yes	24.7847	0	10.577	14	5	2	4	4	5	5	5	Q9D8T2;A0A2R8VKQ7;A0A2R8W727	Q9D8T2;A0A2R8VKQ7	Gasdermin-D
Supt16;Supt16h	4.01813	4.51572	0.000225989	14.9954	15.3626	14.8827	18.8044	19.077	19.4136	No	Yes	25.2493	0	67.137	53	17	9	9	8	14	16	16	G3X956;Q920B9	G3X956;Q920B9	FACT complex subunit SPT16
F13a1	4.01677	3.19289	0.000127854	13.0543	13.1286	13.9924	17.3237	16.768	18.134	No	Yes	24.266	0	20.779	16	11	3	6	5	9	9	10	Q8BH61	Q8BH61	Coagulation factor XIII A chain
Smc4	4.01596	5.01106	0.000311284	13.5751	13.5073	13.5249	17.4522	17.3203	17.8827	No	Yes	23.1819	0	17.496	20	10	5	5	7	9	9	10	Q8CG47;E9Q2X6;A0A0A6YXY3	Q8CG47;E9Q2X6	Structural maintenance of chromosomes protein 4;Structural maintenance of chromosomes protein
Fen1	4.0151	4.18674	0.000303688	13.4558	14.3418	13.7561	18.0224	17.7021	17.8745	No	Yes	25.4211	0	56.165	22	7	1	3	2	7	7	7	Q91Z50;P39749;CON__P01030;CON__ENSEMBL:ENSBTAP00000007350	Q91Z50;P39749	Flap endonuclease 1
Bdh1	4.01371	3.14247	0.000123675	9.73438	11.126	10.9	14.4431	14.2174	15.1409	No	Yes	22.938	0	5.5851	6	3	1	3	2	3	3	3	D3Z2Y8;Q80XN0	D3Z2Y8;Q80XN0	D-beta-hydroxybutyrate dehydrogenase, mitochondrial
Gmppb	4.01111	4.54588	0.000230548	13.0394	12.7717	12.8061	16.7528	16.6081	17.2897	No	Yes	24.1808	0	7.318	8	4	2	2	2	4	4	4	Q8BTZ7	Q8BTZ7	Mannose-1-phosphate guanyltransferase beta
Gripap1	4.01076	3.27198	0.000135922	11.5968	12.6839	11.822	16.4005	15.3672	16.3672	No	Yes	22.3973	0	5.0658	5	5	2	3	2	5	5	5	Q8VD04;A2AEW5;A2AEW9;A2AEW8;A2AEW6	Q8VD04;A2AEW5;A2AEW9;A2AEW8;A2AEW6	GRIP1-associated protein 1
Prpf31	4.00989	2.8682	9.72898e-05	11.7565	13.7354	12.6448	16.4551	16.5973	17.1141	No	Yes	23.9562	0	39.848	27	11	3	7	4	7	8	8	Q8CCF0	Q8CCF0	U4/U6 small nuclear ribonucleoprotein Prp31
Nceh1	4.00884	2.11592	0.00031875	15.2683	14.0709	11.9774	17.9043	17.3516	18.0872	No	Yes	24.7803	0	19.646	24	6	4	3	3	6	6	6	Q8BLF1;Q8BYQ0	Q8BLF1	Neutral cholesterol ester hydrolase 1
Psma1	4.00825	4.1115	0.00028	15.7832	16.2448	16.4484	20.222	19.7783	20.5008	No	Yes	27.6931	0	85.585	46	11	5	6	7	10	11	11	Q9R1P4;A0A1B0GS70	Q9R1P4;A0A1B0GS70	Proteasome subunit alpha type-1
Dek	4.00767	2.76076	8.77193e-05	18.1441	16.701	15.9563	20.772	21.0153	21.0372	No	Yes	28.5921	0	44.972	58	14	9	9	6	14	14	13	Q7TNV0;E9Q8Y1;D3YVJ6	Q7TNV0;E9Q8Y1;D3YVJ6	Protein DEK
Sumf2	4.0076	3.97399	0.000255009	8.76415	8.29815	8.96915	12.4801	12.4092	13.1649	Yes	Yes	21.7791	0	2.9625	1	1	0	0	0	1	1	1	A0A0J9YUK9;A0A0J9YUF6;Q8BPG6	A0A0J9YUK9;A0A0J9YUF6;Q8BPG6	Sulfatase-modifying factor 2
Shoc2	4.0073	4.25641	0.000321101	10.4442	9.93407	10.0099	13.832	14.0347	14.5434	No	Yes	22.1093	0	12.967	4	2	1	1	1	1	2	2	A0A494BAG1;O88520	A0A494BAG1;O88520	Leucine-rich repeat protein SHOC-2
Sec24a	4.00605	2.18982	0.000271908	NaN	10.1174	9.6542	12.7848	14.2338	14.6569	No	Yes	21.2003	0.001368	1.7297	2	2	0	1	1	1	2	2	Q3U2P1;A2AA71;A2AA72	Q3U2P1;A2AA71;A2AA72	Protein transport protein Sec24A
Yars2	4.00579	1.60278	0.000772353	9.13253	7.02268	9.98564	13.8211	10.4363	13.9008	Yes	Yes	17.9664	0	4.8742	3	2	0	0	1	2	1	2	Q8BYL4;E9PX65	Q8BYL4;E9PX65	Tyrosine--tRNA ligase, mitochondrial;Tyrosine--tRNA ligase
Ogt	4.00335	3.38385	0.00014862	11.6586	11.7701	10.6806	15.9227	15.1347	15.0619	No	Yes	21.4269	0	14.103	6	4	2	2	1	4	3	2	Q8CGY8	Q8CGY8	UDP-N-acetylglucosamine--peptide N-acetylglucosaminyltransferase 110 kDa subunit
Mertk	4.00275	3.34251	0.000143149	10.3682	11.3179	10.3242	14.4829	14.2438	15.2918	No	Yes	21.1886	0	24.657	10	2	1	2	1	2	2	2	Q60805	Q60805	Tyrosine-protein kinase Mer
Rpl36a;Gm6525	4.00263	4.64576	0.000241692	15.3776	15.6479	15.033	19.298	19.1953	19.5731	No	Yes	29.4721	0	4.6142	11	4	2	3	2	2	2	3	P83882;A0A2I3BPG9;A0A0A6YW33	P83882;A0A2I3BPG9;A0A0A6YW33	60S ribosomal protein L36a
Pstpip2	4.00149	3.54733	0.00017284	11.1174	11.4318	10.5167	14.6269	14.8365	15.607	No	Yes	22.8078	0	3.0528	5	3	2	2	1	2	3	3	Q99M15;A0A494BAM6	Q99M15	Proline-serine-threonine phosphatase-interacting protein 2
Stau1	3.99998	4.43522	0.000206718	10.0734	9.59786	9.56355	14.0667	13.6889	13.4791	Yes	Yes	21.1748	0	9.4596	5	2	0	0	0	2	2	2	V9GX87;A2A5R8;Q9DBE7;A2A5S3;Q9Z108	V9GX87;A2A5R8;Q9DBE7;A2A5S3;Q9Z108	Double-stranded RNA-binding protein Staufen homolog 1
Plac8	3.9998	4.80501	0.00026936	14.8959	14.6513	15.0785	18.6863	18.7749	19.1639	No	Yes	29.9434	0	6.0666	7	1	1	1	1	1	1	1	Q9JI48	Q9JI48	Placenta-specific gene 8 protein
Sepp1	3.99833	2.51171	0.000161307	9.80072	9.25059	11.671	13.859	14.4272	14.4311	Yes	Yes	21.9834	0	2.296	3	1	0	0	0	1	1	1	P70274	P70274	Selenoprotein P
Tmed10	3.99765	3.68667	0.000194715	15.8626	16.243	15.1237	19.836	19.4147	19.9716	No	Yes	27.7057	0	58.941	49	9	7	9	5	9	8	8	Q9D1D4;A0A1Y7VM54	Q9D1D4;A0A1Y7VM54	Transmembrane emp24 domain-containing protein 10
Sdhaf1	3.99732	3.80695	0.000216049	10.5568	10.8445	10.1073	14.7317	13.965	14.8038	No	Yes	23.7965	0	15.383	1	1	1	1	1	1	1	1	Q3U276	Q3U276	Succinate dehydrogenase assembly factor 1, mitochondrial
Plbd2	3.99546	3.81242	0.000217054	15.3295	15.8849	15.9365	19.1489	19.9854	20.0031	No	Yes	26.9543	0	64.856	46	9	6	7	5	9	9	9	Q3TCN2	Q3TCN2	Putative phospholipase B-like 2;Putative phospholipase B-like 2 28 kDa form;Putative phospholipase B-like 2 40 kDa form;Putative phospholipase B-like 2 15 kDa form
Rhot1	3.9954	2.5095	0.000161224	10.2655	11.7294	NaN	15.092	14.7045	15.182	No	Yes	22.1749	0	2.6416	7	2	1	1	0	2	2	2	Q8BG51	Q8BG51	Mitochondrial Rho GTPase 1
Isoc2a	3.99396	2.93869	0.000102715	13.4737	14.2729	12.7521	17.6728	16.7715	18.0364	No	Yes	25.2522	0	46.82	22	4	2	2	2	4	3	4	P85094	P85094	Isochorismatase domain-containing protein 2A, mitochondrial
Luc7l3	3.99265	3.08721	0.000116086	15.0415	14.9801	13.7428	18.5726	18.0385	19.1314	No	Yes	25.686	0	70.716	29	10	5	6	5	7	8	8	Q5SUF2	Q5SUF2	Luc7-like protein 3
Rps3a	3.99011	4.79059	0.000260586	17.6464	17.6261	17.3958	21.4725	21.2857	21.8804	No	Yes	28.7067	0	88.292	71	15	12	12	13	15	15	14	P97351	P97351	40S ribosomal protein S3a
Engase	3.98886	2.25394	0.000205695	11.1078	11.053	NaN	14.0186	15.3146	15.8746	No	Yes	22.1545	0	17.744	3	3	1	1	0	1	3	3	Q8BX80;F7CXI4;E9Q017	Q8BX80;F7CXI4	Cytosolic endo-beta-N-acetylglucosaminidase
Raly	3.98882	5.8059	0	16.8566	16.7349	16.7963	20.6381	20.7367	20.9794	No	Yes	28.6404	0	76.818	67	16	12	13	14	15	13	13	A2AU62;Q64012;A2AU61;A2AU60	A2AU62;Q64012;A2AU61;A2AU60	RNA-binding protein Raly
Baz1a	3.98796	2.54284	0.000165186	9.81724	11.7741	9.80173	13.7832	14.9277	14.6461	No	Yes	20.7138	0	4.0706	6	4	2	3	1	2	3	3	G3UWZ0;O88379	G3UWZ0;O88379	Bromodomain adjacent to zinc finger domain protein 1A
Unc119b	3.9878	3.11877	0.000118846	8.57045	9.74254	8.28325	12.963	12.3562	13.2404	Yes	Yes	21.0383	0.0097311	1.174	1	1	0	1	0	1	1	1	Q8C4B4	Q8C4B4	Protein unc-119 homolog B
Edc4	3.98774	3.6543	0.000187166	11.842	12.4473	11.2425	16.0864	15.6013	15.8073	No	Yes	21.4908	0	18.775	9	5	1	3	1	4	4	4	D6RE33;A0A0R4J1Q0;G5E896;Q3UJB9;F6ZJ27	D6RE33;A0A0R4J1Q0;G5E896;Q3UJB9	Enhancer of mRNA-decapping protein 4
Glipr2	3.98604	3.68926	0.00019337	13.3757	13.9055	12.8983	17.7231	16.9579	17.4566	No	Yes	26.3286	0	26.123	8	3	2	3	2	3	3	3	Q9CYL5;B1AWD6	Q9CYL5;B1AWD6	Golgi-associated plant pathogenesis-related protein 1
Idi1	3.98527	2.99951	0.00010355	NaN	10.6546	10.5454	14.799	13.9916	14.9652	No	Yes	19.9074	0	4.964	3	3	0	1	1	3	3	3	P58044;H3BLF8;G3XA48	P58044;H3BLF8;G3XA48	Isopentenyl-diphosphate Delta-isomerase 1
Osbp	3.98233	2.50587	0.000159677	11.9438	11.031	10.115	15.3366	13.9544	15.7457	No	Yes	19.6259	0	23.338	8	4	2	1	1	4	2	3	Q3B7Z2;Q8K0C7;Q5QNQ4;Q5QNQ6	Q3B7Z2	Oxysterol-binding protein 1
Adam17	3.98216	3.93214	0.000237691	10.9029	10.7505	10.3207	14.3778	14.3708	15.172	No	Yes	21.3334	0	2.4271	4	2	1	1	1	2	2	2	E9PXU2;Q9Z0F8	E9PXU2;Q9Z0F8	Disintegrin and metalloproteinase domain-containing protein 17
Rps5	3.98083	4.46036	0.000204604	16.352	16.2257	15.9294	19.9948	19.9138	20.5409	No	Yes	28.3791	0	13.241	31	6	4	5	4	5	5	6	D3YYM6;D3Z1S8;Q91V55;P97461	D3YYM6;D3Z1S8;Q91V55;P97461	40S ribosomal protein S5;40S ribosomal protein S5, N-terminally processed
Bud31	3.98047	2.51564	0.000160569	11.4846	9.15244	11.1122	14.2522	14.4916	14.9469	No	Yes	23.6856	0	7.5897	6	3	2	1	2	3	3	2	Q6PGH1	Q6PGH1	Protein BUD31 homolog
Tbc1d10c	3.97912	3.33551	0.000139027	8.50451	9.55762	8.68472	12.5742	12.5855	13.5245	Yes	Yes	20.5827	0	2.6385	1	1	0	1	0	1	1	1	Q8C9V1	Q8C9V1	Carabin
Uso1	3.9788	3.65914	0.000186418	14.9022	14.6529	14.0245	18.4567	18.0697	18.9895	No	Yes	24.7347	0	35.556	37	14	8	8	5	13	14	14	Q9Z1Z0	Q9Z1Z0	General vesicular transport factor p115
Tppp3	3.97819	3.30999	0.000136719	10.8826	11.0017	10.341	14.5511	15.5031	14.1058	No	Yes	22.4479	0	12.586	2	3	2	2	1	3	3	2	Q9CRB6	Q9CRB6	Tubulin polymerization-promoting protein family member 3
Ubqln2	3.97548	3.36181	0.000142132	12.4363	11.9086	11.5307	15.9214	15.3178	16.5628	No	Yes	24.1655	0	10.714	7	2	2	1	1	1	1	2	Q9QZM0	Q9QZM0	Ubiquilin-2
Cox7a2	3.97539	3.80184	0.000210526	17.1258	17.6004	16.8434	20.9692	20.8423	21.6843	No	Yes	30.437	0	8.765	32	2	2	2	2	2	2	2	P48771	P48771	Cytochrome c oxidase subunit 7A2, mitochondrial
Pcca	3.97511	3.39878	0.000147368	13.8952	14.8138	13.985	18.3272	17.5972	18.6949	No	Yes	23.966	0	50.028	39	13	6	7	3	11	13	12	Q91ZA3;D3YWM4;H3BL62	Q91ZA3	Propionyl-CoA carboxylase alpha chain, mitochondrial
Rnf20	3.9735	3.80181	0.00021021	9.02804	8.43184	9.25171	12.5003	12.8093	13.3224	Yes	Yes	19.8687	0.001105	1.8185	1	1	0	0	0	1	1	1	A2AIR2;Q5DTM8	A2AIR2;Q5DTM8	E3 ubiquitin-protein ligase BRE1A
Pdia5	3.97299	2.41735	0.000149692	10.1549	12.5259	12.1875	15.75	15.0141	16.0231	No	Yes	23.1996	0	4.0058	5	3	2	2	2	3	3	3	Q921X9	Q921X9	Protein disulfide-isomerase A5
Golga3	3.97233	2.4688	0.000154902	11.2713	NaN	9.79314	14.3947	14.2798	14.8391	No	Yes	20.2942	0	3.5712	4	2	2	0	1	2	2	2	A0A0R4J1H6;E9QP99;P55937	A0A0R4J1H6;E9QP99;P55937	Golgin subfamily A member 3
Cmtr1;Gm28043	3.96798	2.32857	0.000159929	11.2691	11.2039	NaN	16.1534	14.387	15.0731	No	Yes	21.5435	0	17.726	6	4	1	1	0	4	3	3	Q9DBC3;A0A3Q4EH87;A0A3Q4EHZ1;D3Z491;A0A3Q4EBV9;E0CXC2;G3UZ59	Q9DBC3;A0A3Q4EH87;A0A3Q4EHZ1;D3Z491;A0A3Q4EBV9;E0CXC2	Cap-specific mRNA (nucleoside-2-O-)-methyltransferase 1
Pih1d1	3.96681	2.82315	8.9172e-05	9.20891	NaN	8.27331	12.3372	12.7015	13.0851	No	Yes	20.7731	0	5.0044	2	1	1	0	1	1	1	1	Q9CQJ2	Q9CQJ2	PIH1 domain-containing protein 1
Ifi203	3.96646	3.02141	0.000108108	11.096	10.9152	9.70555	14.1069	14.3277	15.1814	Yes	Yes	22.3074	0	5.238	3	1	0	1	0	1	1	1	E9PUG6;A0A0R4J0H6;E9QAN9;O35368	E9PUG6;A0A0R4J0H6;E9QAN9;O35368	Interferon-activable protein 203
Tra2b	3.96602	3.00653	0.000107116	15.3085	16.566	14.7999	19.3943	19.3232	19.8548	No	Yes	27.6865	0	65.884	40	10	5	7	7	10	10	9	P62996;F8WJG3;A0A0R4J1X8	P62996;F8WJG3	Transformer-2 protein homolog beta
Slc25a3	3.96336	2.39103	0.000146026	17.8873	17.6912	15.4736	21.209	20.4948	21.2383	No	Yes	28.7386	0	29.656	48	12	9	8	5	11	9	10	Q8VEM8;G5E902	Q8VEM8;G5E902	Phosphate carrier protein, mitochondrial
Creb1;Crem;Atf1	3.96144	3.7435	0.000196629	13.6855	14.8181	14.4	18.4599	18.0313	18.2968	No	Yes	28.3509	0	6.1229	3	3	1	3	2	3	2	2	Q62347;Q01147;D3Z7P7;D3Z326;F6VJ22;D3Z6A5;F6QWT6;F6U9F5;F6Q346;F6W4F5;E9PWV9;D3Z7M6;F6QKL8;D3Z2U7;P81269;A0A087WRI6	Q62347;Q01147;D3Z7P7;D3Z326;F6VJ22;D3Z6A5;F6QWT6;F6U9F5;F6Q346;F6W4F5;E9PWV9;D3Z7M6;F6QKL8;D3Z2U7;P81269	Cyclic AMP-responsive element-binding protein 1;Cyclic AMP-dependent transcription factor ATF-1
Sae1	3.96104	4.19063	0.000281124	14.0334	13.8209	13.856	18.2725	17.371	17.9499	No	Yes	25.1457	0	39.723	24	9	4	4	4	9	8	7	Q9R1T2	Q9R1T2	SUMO-activating enzyme subunit 1;SUMO-activating enzyme subunit 1, N-terminally processed
Capzb	3.96019	3.58227	0.00017199	18.1402	18.6161	17.5721	22.155	21.6088	22.4451	No	Yes	30.1231	0	85.753	105	17	15	16	16	16	17	17	A2AMW0;F7CAZ6	A2AMW0;F7CAZ6
Ywhab	3.95998	3.45157	0.000151351	17.6352	18.1304	16.8733	21.3367	21.2636	21.9185	No	Yes	28.9004	0	209.13	61	8	6	7	7	8	8	8	Q9CQV8;A2A5N1	Q9CQV8;A2A5N1	14-3-3 protein beta/alpha;14-3-3 protein beta/alpha, N-terminally processed
Pycr2	3.95953	3.34826	0.000138477	14.6867	15.2041	14.053	18.5675	18.1118	19.1431	No	Yes	26.3916	0	43.066	27	9	5	7	6	9	9	9	Q922Q4;Q922W5;A2ABZ2;A2ABZ3;A2ABZ0	Q922Q4	Pyrroline-5-carboxylate reductase 2
Rad50	3.9586	4.66769	0.000233236	11.6734	12.1449	11.5503	15.5544	15.8633	15.8266	No	Yes	21.5894	0	15.431	9	8	3	3	3	6	7	6	Q5SV02;P70388;A8Y5I3;E9PUJ2	Q5SV02;P70388;A8Y5I3;E9PUJ2	DNA repair protein RAD50
FAM120A	3.95822	4.17257	0.000275049	14.3405	14.7706	14.034	18.3322	18.0454	18.6422	No	Yes	24.1381	0	53.716	26	14	9	12	8	14	14	13	Q6A0A9	Q6A0A9	Constitutive coactivator of PPAR-gamma-like protein 1
Mat2a	3.95642	3.22015	0.000125673	12.9962	14.4172	13.5386	17.3233	17.3973	18.1007	No	Yes	24.9292	0	21.185	17	5	3	4	3	5	5	5	A0A0U1RNT6;A0A0U1RNK6;Q3THS6;A0A0U1RQB0;A0A0U1RQ95;Q91X83	A0A0U1RNT6;A0A0U1RNK6;Q3THS6;A0A0U1RQB0	S-adenosylmethionine synthase isoform type-2
Npepl1	3.95505	3.36794	0.000140562	11.5762	12.9727	12.0604	15.9514	16.0395	16.4834	No	Yes	22.9109	0	7.8831	7	4	1	3	2	3	4	4	Q6NSR8;F6T2H5	Q6NSR8;F6T2H5	Probable aminopeptidase NPEPL1
Srp14	3.95466	4.10419	0.000265152	13.9154	13.5398	13.0486	17.1861	17.6206	17.561	No	Yes	26.7384	0	15.493	11	3	3	3	3	3	3	3	A2AUM6;P16254	A2AUM6;P16254	Signal recognition particle 14 kDa protein;Signal recognition particle 14 kDa protein, N-terminally processed
Gpd1	3.95266	4.09913	0.000263158	14.7683	14.6241	14.4755	18.5788	18.1001	19.047	No	Yes	25.848	0	48.968	29	12	6	7	6	11	10	12	E0CXN5;P13707	E0CXN5;P13707	Glycerol-3-phosphate dehydrogenase [NAD(+)];Glycerol-3-phosphate dehydrogenase [NAD(+)], cytoplasmic
Chdh	3.95111	4.56137	0.000249554	10.1624	10.1334	9.94569	13.9307	NaN	14.1325	No	Yes	19.3893	0	7.9236	4	2	1	1	1	2	1	2	Q8BJ64	Q8BJ64	Choline dehydrogenase, mitochondrial
Txlna	3.95016	3.79226	0.000167464	10.8427	11.0516	NaN	14.6758	14.8326	15.1836	No	Yes	22.3775	0	9.9609	4	2	1	1	0	2	2	2	Q6PAM1	Q6PAM1	Alpha-taxilin
Eif4ebp1	3.9498	2.92487	9.84529e-05	11.0379	10.826	10.4293	15.771	13.932	14.4395	No	Yes	25.9112	0	6.2393	6	1	1	1	1	1	1	1	Q60876	Q60876	Eukaryotic translation initiation factor 4E-binding protein 1
Fkbp2	3.94908	3.16579	0.000121107	14.5521	15.6784	14.1114	18.6256	18.4958	19.0677	No	Yes	27.718	0	33.532	26	4	4	4	4	4	4	3	P45878	P45878	Peptidyl-prolyl cis-trans isomerase FKBP2
Lnp	3.94785	3.72648	0.000192044	10.254	11.2768	11.3216	14.9339	14.7617	15.0004	Yes	Yes	22.5917	0	2.3785	2	2	0	0	1	2	1	1	Q7TQ95;A2ASL8;A2ASM0	Q7TQ95;A2ASL8;A2ASM0	Protein lunapark
Ppm1g	3.94756	3.92926	0.000228385	13.9131	14.5562	13.7721	17.8655	17.786	18.4326	No	Yes	25.3226	0	29.523	27	8	4	8	5	8	7	7	A0A0J9YVG0;Q61074;A0A0J9YV96;A0A0J9YUB0	A0A0J9YVG0;Q61074	Protein phosphatase 1G
Gna13	3.94737	2.65731	0.000119504	13.2929	14.3258	12.2848	17.088	16.7543	17.9034	No	Yes	23.6488	0	24.915	19	9	6	4	4	4	5	6	P27601;Q9D034	P27601	Guanine nucleotide-binding protein subunit alpha-13
Lsm5	3.94716	3.86006	0.000214395	11.8188	12.551	11.5162	16.1157	15.7096	15.9022	No	Yes	26.1209	0	12.353	9	1	1	1	1	1	1	1	A0A0N4SVK3;P62322	A0A0N4SVK3;P62322	U6 snRNA-associated Sm-like protein LSm5
Sod1	3.94636	3.85845	0.00021374	19.5197	19.6421	18.8256	23.0669	23.0662	23.6933	No	Yes	31.673	0	89.215	60	7	5	6	5	7	7	7	P08228	P08228	Superoxide dismutase [Cu-Zn]
Atp6v0d1	3.94498	3.39211	0.000142421	15.0937	16.2944	15.1602	19.3709	19.1852	19.8271	No	Yes	27.3749	0	52.922	30	12	3	7	5	11	11	9	P51863	P51863	V-type proton ATPase subunit d 1
Eif3b	3.94428	3.64408	0.000178117	14.6247	15.2582	14.2207	18.4709	18.384	19.0816	No	Yes	24.5641	0	124.7	43	15	7	11	6	15	14	15	Q8JZQ9;A0A0G2JG48	Q8JZQ9	Eukaryotic translation initiation factor 3 subunit B
Tomm70a	3.94382	2.87547	9.33333e-05	12.8246	14.5972	13.3397	17.4349	17.1115	18.0467	No	Yes	24.4248	0	22.712	20	8	3	6	3	7	7	8	Q9CZW5	Q9CZW5	Mitochondrial import receptor subunit TOM70
Epsti1	3.94194	2.01248	0.000414643	10.2137	9.99368	NaN	14.5924	NaN	13.4989	No	Yes	21.8441	0	2.3968	1	1	1	1	0	1	0	1	Q9D3Q7;A0A140T8I6;Q8VDI1	Q9D3Q7;A0A140T8I6;Q8VDI1	Epithelial-stromal interaction protein 1
Vac14	3.94021	4.59104	0.000211082	13.3162	13.0869	12.8817	17.1839	16.6894	17.2321	No	Yes	23.4605	0	23.725	15	7	2	3	3	6	7	6	Q80WQ2;A0A1D5RLY2;A0A1D5RLN5	Q80WQ2;A0A1D5RLY2	Protein VAC14 homolog
Vps11	3.93914	2.71726	8.16803e-05	11.1393	NaN	11.0348	14.6558	14.6522	15.7706	No	Yes	20.4571	0	13.061	4	4	1	0	1	3	3	4	Q91W86	Q91W86	Vacuolar protein sorting-associated protein 11 homolog
Rfc2	3.93876	2.61623	0.000141151	12.9459	12.4539	10.6527	15.9372	15.9988	15.9329	No	Yes	23.6373	0	9.0999	7	5	3	2	1	5	5	5	Q9WUK4	Q9WUK4	Replication factor C subunit 2
Taldo1	3.93637	4.33204	0.000310421	18.2868	18.4078	17.7469	22.2708	21.8017	22.1781	No	Yes	30.0637	0	38.666	74	18	14	13	12	18	17	16	A0A1B0GR11;Q93092	A0A1B0GR11;Q93092	Transaldolase
Erlec1	3.93392	3.51832	0.000155729	11.8419	10.7591	11.0244	15.3074	14.6805	15.4394	No	Yes	22.2355	0	6.7023	5	2	2	1	2	2	2	2	F6Z458;Q8VEH8	F6Z458;Q8VEH8	Endoplasmic reticulum lectin 1
Rpf2	3.93335	2.72008	8.16327e-05	10.8174	11.6317	NaN	14.6609	15.153	15.6598	No	Yes	23.1387	0	8.9479	4	3	1	2	0	2	3	3	G3X926;Q9JJ80;S4R2R2;S4R2H5;S4R1Y5	G3X926;Q9JJ80;S4R2R2;S4R2H5;S4R1Y5	Ribosome production factor 2 homolog
Snap23	3.93314	3.72765	0.000189189	14.8902	14.305	14.7736	18.2785	18.2888	19.201	No	Yes	26.4893	0	42.452	35	9	6	6	6	7	8	8	Q9D3L3;O09044;B0R029;E9Q8A1;B0R030;P60879	Q9D3L3;O09044;B0R029;E9Q8A1;B0R030	Synaptosomal-associated protein;Synaptosomal-associated protein 23
Creg1	3.93202	3.94126	0.000226904	14.9401	14.3136	14.8825	18.1733	18.7994	18.9595	No	Yes	25.6002	0	34.196	53	4	3	3	3	3	4	4	O88668;J3QP41	O88668;J3QP41	Protein CREG1
Camp	3.9317	3.41744	0.000143737	18.2623	17.9819	17.7327	22.6954	21.3725	21.704	No	Yes	31.0687	0	116.45	51	5	4	3	4	5	4	4	P51437	P51437	Cathelin-related antimicrobial peptide
Abhd14b	3.931	3.97843	0.000234506	11.1754	11.2309	10.9698	14.9684	14.5952	15.6055	No	Yes	24.1958	0	3.0191	7	2	1	1	1	2	2	2	A0A087WP24;A0A087WRJ2;A0A087WPF8;A0A087WSR2;E9QN99;Q8VCR7	A0A087WP24;A0A087WRJ2;A0A087WPF8;A0A087WSR2;E9QN99;Q8VCR7	Alpha/beta hydrolase domain-containing protein 14B
Msra	3.93056	4.18702	0.000271318	14.1487	14.6817	14.0532	18.0951	17.9872	18.5931	No	Yes	26.3701	0	13.057	17	5	4	5	4	4	5	5	Q9D6Y7;A0A1B0GT40	Q9D6Y7;A0A1B0GT40	Mitochondrial peptide methionine sulfoxide reductase
Anp32a	3.92855	3.90903	0.000219436	17.7238	18.0374	17.0684	21.4195	21.3784	21.8175	No	Yes	30.0904	0	100.45	61	11	7	9	6	10	11	10	D3YYE1;D3Z7M9;O35381;F6UFG6;Q64G17	D3YYE1;D3Z7M9;O35381;F6UFG6	Acidic leucine-rich nuclear phosphoprotein 32 family member A
Ube2l3	3.92776	2.9174	9.64852e-05	15.7799	16.2455	14.9727	19.5236	18.8691	20.3886	No	Yes	26.3524	0	66.01	28	7	4	4	3	7	7	7	A0A338P786;P68037;A0A338P7E5;A0A338P702	A0A338P786;P68037;A0A338P7E5	Ubiquitin-conjugating enzyme E2 L3
Tfam	3.92723	2.73775	8.32342e-05	13.5205	15.4495	14.3628	18.1919	17.9276	18.9949	No	Yes	26.4477	0	3.2802	10	4	3	4	3	4	4	4	P40630;A0A0R4J1N9;D3Z0F3	P40630;A0A0R4J1N9;D3Z0F3	Transcription factor A, mitochondrial
Alox15	3.92676	2.14212	0.000318005	11.74	9.89023	9.97207	13.537	13.9374	15.9082	No	Yes	20.0022	0	6.8719	6	3	2	1	1	2	3	3	P39654	P39654	Arachidonate 15-lipoxygenase
Rps6ka4	3.92669	3.92494	0.00022293	11.9383	11.9913	11.6143	15.8414	15.2389	16.2437	No	Yes	22.6498	0	6.5349	7	4	3	3	3	4	3	4	Q9Z2B9	Q9Z2B9	Ribosomal protein S6 kinase alpha-4
Adsl	3.92643	4.02514	0.000240964	13.744	14.1146	13.6091	17.8143	17.2774	18.1553	No	Yes	24.7941	0	28.853	29	8	3	3	2	8	7	8	P54822;E9Q242;E9Q3T7;A0A140LHU1;E9Q0A0;A0A0G2JFI8	P54822;E9Q242;E9Q3T7	Adenylosuccinate lyase
Phrf1	3.92396	2.68383	0.00011991	8.14515	8.78738	9.44787	NaN	12.8338	12.6011	Yes	Yes	20.2059	0.00056386	1.9829	0	1	0	0	0	0	1	1	F7ANA1;A6H619	F7ANA1;A6H619	PHD and RING finger domain-containing protein 1
Igkv3-7;Igkv3-2	3.9237	3.72927	0.000186916	13.8064	13.67	13.0996	16.8951	17.6688	17.7832	No	Yes	27.1516	0	41.266	13	2	1	1	1	2	2	2	P03977;P01656;P01654;P01655;A0A075B5N9;A0A075B5P0;P01673;P01672;P01671;P01670;P01669;P01667;P01657;P01659	P03977;P01656;P01654;P01655;A0A075B5N9;A0A075B5P0;P01673;P01672;P01671;P01670;P01669;P01667;P01657;P01659	Ig kappa chain V-III region 50S10.1;Ig kappa chain V-III region MOPC 70;Ig kappa chain V-III region PC 2880/PC 1229;Ig kappa chain V-III region PC 7132;Ig kappa chain V-III region PC 2485/PC 4039;Ig kappa chain V-III region PC 7940;Ig kappa chain V-III region PC 7175;Ig kappa chain V-III region PC 6684;Ig kappa chain V-III region PC 7769;Ig kappa chain V-III region PC 6308;Ig kappa chain V-III re…
Prorsd1	3.92143	3.49527	0.000152174	11.6351	12.9541	12.5351	16.1029	16.2883	16.4973	No	Yes	24.5983	0	13.424	15	5	1	3	3	5	5	5	Q9D820	Q9D820	Prolyl-tRNA synthetase associated domain-containing protein 1
H2-Aa	3.92082	3.05956	0.000108611	15.5494	16.5809	14.9564	19.7411	19.1721	19.936	No	Yes	28.6875	0	28.016	17	3	3	3	3	3	3	3	P14438;P14434;G3UWR9;P04227;P14437;P14436;P14435;P23150;P04228;P01910	P14438;P14434;G3UWR9	H-2 class II histocompatibility antigen, A-U alpha chain;H-2 class II histocompatibility antigen, A-B alpha chain;Beta-2-microglobulin
Synj2bp;Gm20498	3.91935	1.77666	0.000607226	12.8195	13.7731	9.82294	15.7174	15.7659	16.6903	No	Yes	23.6933	0	15.704	11	3	2	3	2	3	3	3	Q9D6K5;E9PVN6;E9PVQ9	Q9D6K5;E9PVN6	Synaptojanin-2-binding protein
Pygl	3.91875	3.98949	0.000232558	16.263	16.6761	15.9857	20.64	19.8595	20.1816	No	Yes	26.2953	0	60.787	57	19	10	14	10	18	17	17	Q9ET01;Q3UEJ6;E9PUM3;Q9WUB3	Q9ET01;Q3UEJ6	Glycogen phosphorylase, liver form;Alpha-1,4 glucan phosphorylase
Hmgb3	3.9179	3.31604	0.000132325	13.955	14.0779	13.3855	17.3477	18.5183	17.3062	No	Yes	26.7116	0	16.026	13	4	2	4	2	4	4	3	O54879;A2AP78	O54879;A2AP78	High mobility group protein B3
Ccar1	3.91709	4.69115	0.000220386	13.6884	13.6076	14.0896	17.8892	17.4482	17.7995	No	Yes	23.8851	0	24.735	25	10	4	4	5	8	10	9	Q8CH18;A0A1W2P765	Q8CH18	Cell division cycle and apoptosis regulator protein 1
Mdp1	3.91644	3.74766	0.000188679	12.9526	13.834	13.2177	17.1782	16.8926	17.6828	No	Yes	25.9282	0	56.84	22	7	4	5	3	7	7	7	Q9D967	Q9D967	Magnesium-dependent phosphatase 1
Tkt	3.91509	4.5739	0.00020202	19.652	19.8886	19.4133	23.7595	23.2373	23.7024	No	Yes	30.2507	0	235.5	213	32	29	29	28	27	30	31	P40142;A0A286YE28;E0CY51	P40142;A0A286YE28	Transketolase
Slc15a4	3.91486	3.71592	0.000184453	12.6628	11.7057	12.4623	16.2259	15.8246	16.5248	No	Yes	23.1547	0.00028662	2.1082	4	2	2	1	2	2	2	2	Q91W98;F6QFB4;D6RDC2	Q91W98;F6QFB4;D6RDC2	Solute carrier family 15 member 4
Anp32b	3.91464	4.99683	0.000265781	16.4653	16.5242	16.1905	20.213	20.1404	20.5706	No	Yes	28.284	0	41.74	37	5	4	5	4	5	5	5	Q9EST5	Q9EST5	Acidic leucine-rich nuclear phosphoprotein 32 family member B
Macf1	3.91444	2.81387	8.72274e-05	13.7171	13.5591	12.1853	16.7562	16.6402	17.8084	No	Yes	19.8175	0	47.292	29	17	8	7	5	14	16	16	E9QA63;B1ARU4;E9PVY8;F6Q750;A0A571BGC6;A0A571BF93;A0A0A0MQA6;F7ACR9;E9QNP1;Q9QXZ0;A0A286YD76;F6XCT0;F6SHS0	E9QA63;B1ARU4;E9PVY8;F6Q750;A0A571BGC6;A0A571BF93;A0A0A0MQA6;F7ACR9;E9QNP1;Q9QXZ0	Microtubule-actin cross-linking factor 1
Fkbp5	3.91308	4.83643	0.000240964	13.0974	13.1441	13.4502	17.3121	16.8497	17.2692	No	Yes	24.1381	0	7.6524	14	5	3	3	3	4	4	4	Q64378;A0A3B2WBD2;B8JJC2;A0A3B2WCL4	Q64378;A0A3B2WBD2	Peptidyl-prolyl cis-trans isomerase FKBP5;Peptidyl-prolyl cis-trans isomerase FKBP5, N-terminally processed
Rpl10;Rpl10l	3.91268	4.34162	0.000299145	16.122	15.9466	15.4954	19.6836	19.5418	20.0767	No	Yes	28.1341	0	98.646	43	10	8	8	5	10	10	10	I7HLV2;Q6ZWV3;P86048;A0A1B0GXC3	I7HLV2;Q6ZWV3;P86048	60S ribosomal protein L10;60S ribosomal protein L10-like
Fcer1g	3.91218	1.95428	0.000434783	14.3423	15.7964	13.0071	18.9746	16.8598	19.0479	No	Yes	29.3111	0	15.164	16	3	3	3	2	3	3	3	P20491	P20491	High affinity immunoglobulin epsilon receptor subunit gamma
Plbd1	3.91157	3.10451	0.000112	17.5692	18.4914	16.9009	21.3515	21.3359	22.0087	No	Yes	28.9507	0	149.47	68	16	7	13	7	14	16	15	A0A0R4J0B2;Q8VCI0	A0A0R4J0B2;Q8VCI0	Phospholipase B-like 1;Phospholipase B-like 1 chain A;Phospholipase B-like 1 chain B;Phospholipase B-like 1 chain C
Cmc2	3.90768	3.26854	0.000126126	10.6892	10.5886	9.43125	14.1185	14.5485	13.7652	No	Yes	21.7671	0.00028885	2.1684	4	2	1	1	1	2	2	1	Q8K199;F8WHQ0	Q8K199;F8WHQ0	COX assembly mitochondrial protein 2 homolog
Psmb9	3.90754	3.49713	0.000150054	15.4801	14.4935	15.2719	19.1039	18.4757	19.3885	No	Yes	27.6184	0	6.2718	15	4	3	3	3	3	2	3	P28076;A0A0R4J256;G3UYK5;A0A494B9L1	P28076;A0A0R4J256	Proteasome subunit beta type-9
Myo9b	3.90728	4.17509	0.000264151	12.6041	13.0675	12.3081	16.414	16.4082	16.8793	No	Yes	21.8419	0	38.367	22	10	4	6	4	7	9	9	A0A1D5RLD1;E9QKV6;E9PWZ6;E9PZW8;Q9QY06;A0A1D5RLW4	A0A1D5RLD1;E9QKV6;E9PWZ6;E9PZW8;Q9QY06;A0A1D5RLW4	Unconventional myosin-IXb
Acly	3.90615	4.35521	0.000299786	15.0209	15.3997	15.146	19.0719	18.7321	19.481	No	Yes	25.1663	0	51.429	54	19	10	12	8	18	18	19	Q3V117;Q91V92;Q3TS02	Q3V117;Q91V92	ATP-citrate synthase
Akna	3.90515	2.18338	0.000295121	10.4742	9.3086	7.51041	12.7469	12.6317	13.63	Yes	Yes	19.1475	0.00056322	1.9765	3	2	0	0	1	2	1	1	Q80VW7	Q80VW7	AT-hook-containing transcription factor
Gne	3.90429	3.46723	0.000146905	8.87854	8.6399	9.76935	12.7847	12.767	13.449	Yes	Yes	20.1397	0	3.4658	1	1	0	0	0	1	1	1	G3UYD5;G3UX23;Q3UW64;Q91WG8	G3UYD5;G3UX23;Q3UW64;Q91WG8	Bifunctional UDP-N-acetylglucosamine 2-epimerase/N-acetylmannosamine kinase;UDP-N-acetylglucosamine 2-epimerase (hydrolyzing);N-acetylmannosamine kinase
As3mt	3.90418	3.88276	0.000207407	12.6813	13.133	12.9043	16.9975	16.2355	17.1982	No	Yes	23.2623	0	30.554	16	7	3	4	3	6	5	5	Q91WU5;A0A494B985	Q91WU5	Arsenite methyltransferase
Aif1	3.90405	2.60458	0.000166931	15.7401	17.0048	14.8762	19.4913	19.4239	20.418	No	Yes	28.4289	0	72.82	30	7	4	4	4	7	7	7	O70200;G3UYJ2	O70200;G3UYJ2	Allograft inflammatory factor 1
Rab8a	3.90362	2.80216	8.61538e-05	14.0049	15.5637	13.6121	18.1673	18.125	18.5993	No	Yes	26.4093	0	8.3259	20	3	3	3	3	3	3	3	P55258	P55258	Ras-related protein Rab-8A
Klc1;Klc2	3.90103	2.85187	8.92857e-05	13.6108	13.5631	11.9639	16.5976	16.8138	17.4294	No	Yes	23.8705	0	17.363	14	8	3	5	2	6	8	8	Q5UE59;E9Q7C9;Q7TNF4;Q8CD76;A0A5F8MPZ2;O88447;D3YXZ3;Q91YS4;O88448;F6UYN4	Q5UE59;E9Q7C9;Q7TNF4;Q8CD76;A0A5F8MPZ2;O88447;D3YXZ3;Q91YS4;O88448	Kinesin light chain 1;Kinesin light chain 2
Nek7	3.90015	4.51622	0.000335731	11.315	11.4532	11.0092	14.8038	15.3606	15.3135	No	Yes	23.1927	0	4.182	4	3	1	1	1	2	3	2	Q3TN15;Q9ES74	Q3TN15;Q9ES74	Serine/threonine-protein kinase Nek7
Sh3bgrl	3.9	2.80393	8.61009e-05	14.5399	15.8043	13.7988	18.5096	18.3614	18.972	No	Yes	27.5001	0	27.347	25	5	4	4	4	5	5	5	Q9JJU8	Q9JJU8	SH3 domain-binding glutamic acid-rich-like protein
Tnfaip8l2	3.89986	3.46316	0.000145682	14.4454	14.3189	13.2626	17.7351	17.746	18.2454	No	Yes	26.51	0	40.985	15	5	4	3	2	5	5	5	Q9D8Y7	Q9D8Y7	Tumor necrosis factor alpha-induced protein 8-like protein 2
Ndufb9	3.89973	1.94937	0.000433239	9.79581	11.1938	7.63093	13.5333	12.8797	13.9067	Yes	Yes	22.564	0	3.7865	1	1	0	1	0	1	1	1	Q9CQJ8	Q9CQJ8	NADH dehydrogenase [ubiquinone] 1 beta subcomplex subunit 9
Zcchc6	3.89923	2.87246	8.89454e-05	NaN	10.1622	9.95661	13.5813	14.5981	13.6964	No	Yes	19.4819	0	4.2121	3	2	0	1	1	2	2	1	Q5BLK4;E9PUA2;A0A286YDD7	Q5BLK4;E9PUA2;A0A286YDD7	Terminal uridylyltransferase 7
Itm2b	3.89835	2.78775	8.49515e-05	11.0738	12.1665	10.2448	15.1089	14.5656	15.5056	No	Yes	23.1409	0	6.9089	4	3	1	2	1	3	3	3	O89051;A0A2I3BPW7	O89051;A0A2I3BPW7	Integral membrane protein 2B;BRI2, membrane form;BRI2 intracellular domain;BRI2C, soluble form;Bri23 peptide
Stx11	3.89703	1.83264	0.000472813	14.3919	14.7393	11.1295	17.3676	16.8821	17.702	No	Yes	25.2038	0	14.093	12	5	4	4	1	5	5	5	Q3U5V8;Q9D3G5;A0A1W2P6Y3;A0A1W2P6E3	Q3U5V8;Q9D3G5;A0A1W2P6Y3	Syntaxin-11
Aldh1a1;Aldh1a7	3.89659	3.31078	0.000129032	8.87378	9.06446	8.0705	12.5283	12.0125	13.1577	Yes	Yes	20.0975	0	5.7094	1	2	0	1	0	2	2	2	P24549;O35945	P24549;O35945	Retinal dehydrogenase 1;Aldehyde dehydrogenase, cytosolic 1
Appl1	3.89526	2.43581	0.000147045	10.6598	12.0978	9.52461	14.6858	14.2733	15.0089	No	Yes	21.6543	0	12.265	5	2	1	1	1	2	2	2	Q8K3H0	Q8K3H0	DCC-interacting protein 13-alpha
Hdgf	3.89249	3.79384	0.000191781	15.5503	15.1422	14.5061	18.9452	18.7124	19.2184	No	Yes	26.9156	0	16.704	25	8	5	4	4	7	8	8	P51859;E0CXA0;E0CYW7	P51859;E0CXA0	Hepatoma-derived growth factor
Gmps	3.89213	5.21283	0.000290909	12.848	13.1153	12.6493	16.762	16.6607	16.8662	No	Yes	21.9762	0	41.654	20	8	3	4	3	8	8	8	Q3THK7	Q3THK7	GMP synthase [glutamine-hydrolyzing]
Ighm	3.89028	5.09758	0.000272109	19.1479	19.304	18.908	23.0901	22.7973	23.1433	No	Yes	30.2741	0	153.73	126	20	14	14	14	18	19	18	A0A075B5P6;A0A075B6A0;P01872	A0A075B5P6;A0A075B6A0;P01872	Ig mu chain C region
Gaa	3.88879	2.95041	9.68188e-05	11.7504	13.1112	12.4634	16.1764	15.7322	17.0827	No	Yes	23.0095	0	38.095	13	6	2	3	3	5	5	5	P70699;F6VEG4;A2AFL5;F6R5R5;A2AFL3	P70699	Lysosomal alpha-glucosidase
Rexo2	3.88863	4.00366	0.000227642	13.4369	13.3264	13.0349	16.966	16.8063	17.6919	No	Yes	25.7174	0	3.039	6	2	1	1	1	1	2	1	Q9D8S4	Q9D8S4	Oligoribonuclease, mitochondrial
Rasgrp2	3.8867	3.62561	0.000165289	14.1688	14.6786	13.9507	17.7625	17.9465	18.7493	No	Yes	24.0304	0	68.596	34	11	5	7	4	11	10	11	Q9QUG9;D6RDD3;D3YXD6;D3Z2F9;D3Z3N3;D3YZX2;D3YZP2;D3YZP4;D3YZP1	Q9QUG9	RAS guanyl-releasing protein 2
Thap11	3.88633	3.89131	0.00020438	10.4103	10.7886	9.84557	14.2646	13.9416	14.4972	No	Yes	23.3468	0	3.4867	4	2	2	2	1	2	2	2	Q9JJD0	Q9JJD0	THAP domain-containing protein 11
Sin3a	3.88571	2.73697	8.15376e-05	13.2556	13.8555	11.7937	16.8802	16.5342	17.1475	No	Yes	22.4612	0	37.969	18	10	4	7	2	8	7	9	Q60520;E9PXF9	Q60520	Paired amphipathic helix protein Sin3a
Stx6	3.88365	1.58589	0.000816096	8.04247	11.0755	NaN	13.3349	12.8218	14.1712	No	Yes	19.5997	0	24.583	6	2	1	1	0	2	2	2	Q9JKK1;A0A0A6YW23;A0A0A6YXG0	Q9JKK1;A0A0A6YW23;A0A0A6YXG0	Syntaxin-6
Mtmr9	3.88343	3.0134	9.79021e-05	NaN	10.9283	10.178	14.5693	14.0527	14.6877	No	Yes	21.7709	0	2.6062	5	2	0	2	2	2	2	2	Q9Z2D0	Q9Z2D0	Myotubularin-related protein 9
Sash3	3.88054	2.4531	0.000148636	12.7441	14.2347	11.6621	16.7537	16.4865	17.0423	No	Yes	21.6637	0	22.981	18	5	2	3	3	5	5	5	Q8K352	Q8K352	SAM and SH3 domain-containing protein 3
Parn	3.88039	4.77239	0.00021978	8.95215	8.35039	8.73863	12.497	12.4836	12.7018	Yes	Yes	19.7898	0	4.8274	3	1	0	1	0	1	1	1	A0A0R4J0P6;Q8VDG3	A0A0R4J0P6;Q8VDG3	Poly(A)-specific ribonuclease PARN
Snrnp70	3.88006	3.11078	0.000110497	15.4111	16.2594	14.7072	18.8813	19.495	19.6416	No	Yes	26.6081	0	23.771	32	9	6	8	4	7	9	8	Q62376;A0A1B0GRR8;A0A1B0GR44;A0A1B0GSX5;A0A1B0GR50;A0A1B0GR69;A0A1B0GRV8	Q62376;A0A1B0GRR8;A0A1B0GR44	U1 small nuclear ribonucleoprotein 70 kDa
Pmm2	3.87918	4.36729	0.000291667	14.6234	14.109	14.1938	18.0725	17.9509	18.5404	No	Yes	25.94	0	11.799	18	7	5	4	4	7	7	7	Q9Z2M7;Q9D6D9;Q91W01;A0A2R8W6J8;O35621	Q9Z2M7	Phosphomannomutase 2
Emc3	3.87826	2.951	9.61538e-05	9.64625	9.09357	8.15285	12.5078	12.4833	13.5363	Yes	Yes	21.277	0.0034909	1.5613	1	1	0	0	0	1	1	1	Q99KI3	Q99KI3	ER membrane protein complex subunit 3
Gpld1	3.87823	4.07628	0.000236486	12.455	12.7044	11.9526	16.6062	16.0483	16.0922	No	Yes	22.8582	0	9.6132	12	6	3	4	3	6	5	5	Q8VCU2;O70362	Q8VCU2;O70362	Phosphatidylinositol-glycan-specific phospholipase D
Sars2	3.87756	3.76982	0.00018543	12.2366	12.1503	11.6224	16.1221	15.3196	16.2002	No	Yes	23.1318	0	14.079	3	2	1	1	1	2	2	2	Q9JJL8	Q9JJL8	Serine--tRNA ligase, mitochondrial
Tpm3-rs7	3.87654	3.03876	0.000103858	17.4258	17.103	16.8648	20.0912	21.1105	21.8214	No	Yes	28.9767	0	14.025	68	6	4	4	3	6	6	6	D3Z2H9;D3YVR0	D3Z2H9
Zc3hav1	3.87607	4.05421	0.000233333	12.1422	12.3021	12.0082	15.5467	16.5002	16.0338	No	Yes	22.0853	0	20.464	10	5	1	1	3	5	4	4	Q3UPF5;D3Z5I1;G3X9X5	Q3UPF5;D3Z5I1;G3X9X5	Zinc finger CCCH-type antiviral protein 1
Csde1	3.87511	3.48035	0.000144479	13.2043	13.6347	12.3458	17.015	16.6631	17.1321	No	Yes	23.2772	0	13.686	12	6	3	4	3	6	5	5	A0A0G2JF72;Q8JZN2;Q91W50	A0A0G2JF72;Q8JZN2;Q91W50	Cold shock domain-containing protein E1
Snx12	3.87508	2.4235	0.000144556	12.578	14.6803	12.334	17.0297	16.7149	17.473	No	Yes	25.8699	0	16.578	13	6	1	4	1	4	3	5	Q6ZWQ5;Q3TGS7;Q3V2H3;O70493	Q6ZWQ5;Q3TGS7;Q3V2H3;O70493	Sorting nexin-12
Gstp1	3.87319	2.58381	0.000162134	16.7473	16.5698	14.6815	19.6867	19.6005	20.3309	No	Yes	27.6344	0	90.021	42	9	4	7	4	9	9	8	P19157;A0A494BAW2;A0A494B908;P46425;A0A494BAM8;A0A494BAS3;A0A494BAU3	P19157;A0A494BAW2;A0A494B908	Glutathione S-transferase P 1
Taok3	3.87253	4.44939	0.000309051	13.1368	12.7967	13.3638	16.7548	16.8803	17.2798	No	Yes	23.4175	0	31.891	18	9	4	4	5	9	9	9	Q8BYC6;Q3V3K3;A0A0R4J1T3;F6RXB5;Q5F2E8	Q8BYC6;Q3V3K3;A0A0R4J1T3	Serine/threonine-protein kinase TAO3
Gbf1	3.87176	2.97395	9.76971e-05	11.5656	10.5842	10.4013	14.1427	14.5035	15.5203	No	Yes	20.0334	0	6.4368	7	3	2	2	1	2	3	3	Q6DFZ1;H3BLN1	Q6DFZ1
Pef1	3.86999	2.78649	8.37822e-05	9.2879	10.228	8.19807	13.1093	12.7835	13.4311	No	Yes	22.4237	0	6.6982	3	1	1	1	1	1	1	1	Q8BFY6	Q8BFY6	Peflin
Cers2	3.86956	2.89264	9.04393e-05	12.8041	12.7929	11.148	16.1299	15.8151	16.4087	No	Yes	25.4298	0	6.4693	2	1	1	1	1	1	1	1	D3Z4M2;D3YTM0;D3Z0Z2;Q924Z4	D3Z4M2;D3YTM0;D3Z0Z2;Q924Z4	Ceramide synthase 2
Kynu	3.86767	2.58612	0.000161885	9.26467	11.1549	9.19073	13.9939	13.1937	14.0257	Yes	Yes	20.0785	0.00056433	1.9863	3	2	0	0	1	2	2	2	A2ARD7;Q6NSV5;A2ARD6;Q9CXF0	A2ARD7;Q6NSV5;A2ARD6;Q9CXF0	Kynureninase
Eif5a	3.86405	3.877	0.00019774	17.8855	17.875	17.1621	21.7602	21.0877	21.6669	No	Yes	29.4233	0	201.06	110	16	10	11	7	16	16	15	P63242;A0A0A0MQM0;J3QPS8;Q8BGY2	P63242;A0A0A0MQM0;J3QPS8	Eukaryotic translation initiation factor 5A-1;Eukaryotic translation initiation factor 5A
Akap10	3.86331	1.87437	0.000454483	7.49893	11.061	10.1143	13.8265	12.6763	13.7615	Yes	Yes	20.1964	0	3.5598	1	2	0	1	0	2	1	2	O88845	O88845	A-kinase anchor protein 10, mitochondrial
Dctn1	3.86153	3.47835	0.000142566	15.2768	14.7338	14.1403	18.7188	18.121	18.8958	No	Yes	24.0655	0	106.06	44	20	11	11	7	19	17	19	E9Q586;E9Q3M3;O08788;D3YX34;D3Z2M9;D3YYG9	E9Q586;E9Q3M3;O08788;D3YX34	Dynactin subunit 1
Rars	3.85875	3.59487	0.000154867	14.3758	15.3346	14.3176	18.5212	18.2287	18.8544	No	Yes	25.2112	0	53.427	38	16	6	12	5	14	14	14	Q9D0I9	Q9D0I9	Arginine--tRNA ligase, cytoplasmic
Crlf3	3.8582	4.30246	0.00027027	14.7912	14.7679	14.6795	18.6132	18.1746	19.0254	No	Yes	25.8094	0	71.598	36	9	5	5	5	9	7	7	Q9Z2L7;J3QMV5;J3QPM4;J3QP70	Q9Z2L7	Cytokine receptor-like factor 3
Tspan14	3.85714	2.65662	0.000139935	8.98277	10.9312	10.6502	13.8284	13.7238	14.5834	Yes	Yes	22.2669	0	2.6297	2	1	0	1	0	1	1	1	Q8QZY6	Q8QZY6	Tetraspanin-14
Clasp2	3.85651	5.54483	0.000323887	12.1697	12.0843	11.9163	16.0345	15.7261	15.9792	No	Yes	21.343	0	10.97	10	5	4	3	4	4	5	5	Q8BRT1;E9Q8N5;Q08EB6;Q08EB5;F7DCH5;A0A1L1SRY3;A0A087WQF1;E9QKH0;E9QNY9;A0A087WRE8;A0A087WP42;A0A087WRK0;A0A087WNW8;A0A087WQ95;J3QP81;A0A087WS18;A0A0N4SUT7;E9Q6L0;A0A0A6YXZ1;A0A1L1ST22;Q8BSE7;A0A087WQ31;Q80TV8	Q8BRT1;E9Q8N5;Q08EB6;Q08EB5;F7DCH5	CLIP-associating protein 2
Dnajc7	3.85619	3.17487	0.000113636	14.2049	13.0682	12.6091	17.0519	17.0632	17.3357	No	Yes	24.8267	0	23.888	23	9	3	5	2	7	9	8	F7BTP8;A0A6I8MWZ9;A0A6I8MWY7;A0A6I8MWZ1;A2A5E1;A0A6I8MX00;A0A6I8MWX8;Q9QYI3;A0A6I8MWZ5;A0A6I8MWW2;A0A6I8MX31;A0A6I8MWW0	F7BTP8;A0A6I8MWZ9;A0A6I8MWY7;A0A6I8MWZ1;A2A5E1;A0A6I8MX00;A0A6I8MWX8;Q9QYI3	DnaJ homolog subfamily C member 7
Ctsb	3.856	3.00855	9.95733e-05	19.7089	20.3871	18.7119	23.0592	23.4903	23.8264	No	Yes	30.6199	0	244.31	136	15	11	12	5	14	15	15	P10605	P10605	Cathepsin B;Cathepsin B light chain;Cathepsin B heavy chain
Vwa5a	3.85562	3.61705	0.000157658	14.6658	14.8027	13.7432	18.2247	17.9951	18.5589	No	Yes	24.7694	0	79.433	39	16	5	8	7	14	14	14	Q99KC8;Q8BGF0;F6TIL5;D3Z518	Q99KC8	von Willebrand factor A domain-containing protein 5A
Edc3	3.85136	5.07977	0.000249221	10.3492	10.4537	10.485	14.387	13.9805	14.4744	No	Yes	21.5289	0	2.7592	4	1	1	1	1	1	1	1	Q8K2D3	Q8K2D3	Enhancer of mRNA-decapping protein 3
Gclm	3.85112	2.6609	0.000169528	NaN	11.2299	12.3462	15.2296	15.8343	15.8535	No	Yes	23.6815	0	6.2406	6	3	0	2	1	2	3	2	F6VNW5;H3BJA3;O09172;A0A0G2JDI4	F6VNW5;H3BJA3;O09172;A0A0G2JDI4	Glutamate--cysteine ligase regulatory subunit
Cd2bp2	3.85023	3.42857	0.000136319	11.1907	10.7009	10.7979	15.5161	14.422	14.3021	No	Yes	23.3156	0	2.9406	3	2	1	1	1	2	2	1	Q9CWK3;A0A0U1RPR4;A0A0U1RNN2;A0A0U1RP07;A0A0U1RNG1	Q9CWK3;A0A0U1RPR4;A0A0U1RNN2;A0A0U1RP07;A0A0U1RNG1	CD2 antigen cytoplasmic tail-binding protein 2
Rbm12;Gm28036	3.84918	2.66597	0.000140465	11.4895	12.1575	11.2883	14.391	15.6119	16.4799	No	Yes	21.1291	0	5.1797	3	3	2	2	1	2	3	3	Q8R4X3;F6YJB6;V9GXJ1	Q8R4X3;F6YJB6;V9GXJ1	RNA-binding protein 12
Rufy3	3.8476	4.90332	0.000229885	10.7403	10.8869	10.7759	14.4579	14.5029	14.9851	No	Yes	21.6996	0.0052521	1.3521	2	1	1	1	1	1	1	1	A0A0G2JFT8;Q9D394	A0A0G2JFT8;Q9D394	Protein RUFY3
Cd9	3.84713	1.84001	0.000494956	12.7727	14.2858	10.4803	16.556	15.7267	16.7974	No	Yes	21.8799	0	11.131	10	2	1	2	1	2	1	1	P40240	P40240	CD9 antigen
Katnal2;Spata5	3.84684	1.92891	0.000446479	12.7509	15.0727	NaN	17.4752	17.6722	18.1285	No	Yes	26.098	0.00056899	2.0467	2	1	1	1	0	1	1	1	D3Z0U5;D6RGM7;D3Z4J2;A0A0G2JFY0;A0A0A0MQ80;Q9D3R6;Q3UMC0	D3Z0U5;D6RGM7;D3Z4J2;A0A0G2JFY0;A0A0A0MQ80;Q9D3R6;Q3UMC0	Katanin p60 ATPase-containing subunit A-like 2;Spermatogenesis-associated protein 5
Mrpl40	3.84666	3.15724	0.000111821	12.295	13.1123	12.0624	15.9745	15.9609	17.0743	No	Yes	24.901	0	28.314	18	6	4	4	2	5	6	6	D3Z7C0;Q9Z2Q5	D3Z7C0;Q9Z2Q5	39S ribosomal protein L40, mitochondrial
Shmt1	3.84251	4.13955	0.000238501	10.8059	11.1806	10.9343	15.1419	14.3283	14.9781	No	Yes	22.2741	0.0034946	1.5719	3	2	1	2	1	2	2	2	G3UZ26;G3UYY1;P50431;G3UZZ9	G3UZ26;G3UYY1;P50431	Serine hydroxymethyltransferase;Serine hydroxymethyltransferase, cytosolic
Fdx1	3.84039	2.96776	9.48509e-05	11.1759	12.7022	12.3076	16.0316	15.3333	16.342	No	Yes	24.5698	0.00028555	2.0787	6	2	1	1	1	2	2	2	P46656	P46656	Adrenodoxin, mitochondrial
Hscb	3.83468	3.39092	0.000131332	12.386	12.7914	11.7377	16.0617	15.6816	16.6759	No	Yes	23.8543	0	9.6686	10	4	3	3	2	4	4	4	A0A0R4J0T0;Q8K3A0;F6UL52;F6WN43	A0A0R4J0T0;Q8K3A0;F6UL52;F6WN43	Iron-sulfur cluster co-chaperone protein HscB, mitochondrial
Lmf1	3.83398	2.6861	0.000141767	8.57582	10.5802	9.61147	13.7114	12.8337	13.7244	Yes	Yes	21.3442	0	2.5549	1	1	0	1	0	1	1	1	F6YC79;Z4YJR1;Q3U3R4	F6YC79;Z4YJR1;Q3U3R4	Lipase maturation factor;Lipase maturation factor 1
Ddx1	3.83228	3.9856	0.000207715	14.483	15.217	14.5058	18.5989	18.2537	18.85	No	Yes	24.8106	0	82.541	39	14	5	10	6	13	12	13	Q91VR5;A0A1Y7VM48	Q91VR5	ATP-dependent RNA helicase DDX1
Flnb	3.83003	3.00752	9.77654e-05	11.7954	12.1145	10.602	15.2168	14.9438	15.8415	No	Yes	19.4516	0	6.8486	7	3	2	3	2	3	3	3	Q80X90	Q80X90	Filamin-B
Pdk3	3.82963	3.48368	0.000138614	13.243	13.468	12.5934	16.5219	16.7549	17.5165	No	Yes	24.5306	0	6.5397	12	4	3	4	2	3	3	4	Q922H2	Q922H2	[Pyruvate dehydrogenase (acetyl-transferring)] kinase isozyme 3, mitochondrial
Actn2	3.82961	3.08631	0.00010479	10.4251	11.0924	10.2154	14.0845	13.8746	15.2627	No	Yes	20.843	0	38.71	3	2	1	1	1	1	1	1	Q9JI91	Q9JI91	Alpha-actinin-2
Rcl1	3.82845	5.17938	0.000261682	9.32816	9.21721	9.1517	13.0332	NaN	13.0884	Yes	Yes	20.2461	0.0002886	2.1664	1	1	0	0	0	1	0	1	A0A494BAM2;Q9JJT0	A0A494BAM2;Q9JJT0	RNA 3-terminal phosphate cyclase-like protein
Mrpl9	3.82799	2.77472	8.14901e-05	8.89568	10.7508	9.20225	13.6091	13.0163	13.7074	No	Yes	21.2632	0	4.1782	1	2	1	1	1	2	2	2	Q3UK02;Q99N94	Q3UK02;Q99N94	39S ribosomal protein L9, mitochondrial
Sdhb	3.82722	3.04918	0.000101083	15.6858	16.6323	15.1976	19.6224	19.1672	20.2077	No	Yes	27.3223	0	19.193	32	8	6	7	7	8	8	8	Q9CQA3	Q9CQA3	Succinate dehydrogenase [ubiquinone] iron-sulfur subunit, mitochondrial
Lypla2	3.82538	4.51117	0.000300429	14.3496	14.3883	14.287	18.0385	17.8746	18.588	No	Yes	26.1054	0	30.405	23	6	3	5	3	5	5	5	Q9WTL7	Q9WTL7	Acyl-protein thioesterase 2
Igkv4-63	3.82406	1.9828	0.000434009	8.78607	9.6419	10.109	14.6639	11.4767	13.8685	Yes	Yes	23.7065	0	3.0018	1	1	0	0	0	1	1	1	A0A075B5M1	A0A075B5M1
Anxa1	3.82228	3.58974	0.000149733	19.247	19.474	18.8624	23.6661	22.6088	22.7754	No	Yes	30.2194	0	202.7	176	26	23	23	21	26	26	25	P10107;A0A494BBD8	P10107;A0A494BBD8	Annexin A1
Capg	3.82153	3.79929	0.000178571	17.227	17.6391	16.9752	21.4581	20.5787	21.2691	No	Yes	29.2344	0	160.64	77	11	9	9	8	11	10	10	Q99LB4;P24452;D3YTL5;D3YZN3;D3YU77;D3Z014;D3Z4K5	Q99LB4;P24452;D3YTL5	Macrophage-capping protein
Ncbp1	3.8215	2.43453	0.000142664	10.2127	12.5078	11.1706	15.6467	15.2976	14.4113	No	Yes	21.4601	0	8.2369	5	4	1	3	1	4	3	1	Q3UYV9	Q3UYV9	Nuclear cap-binding protein subunit 1
Chchd6	3.81898	4.16788	0.00023569	13.4049	13.0296	13.2294	17.0001	16.642	17.4788	No	Yes	23.6527	0	32.877	14	5	2	4	3	5	3	3	E9Q4M4;Q91VN4	E9Q4M4;Q91VN4	MICOS complex subunit Mic25
Spag9	3.81712	4.51106	0.000295983	12.0335	12.4605	11.7659	15.991	15.7453	15.975	No	Yes	21.9506	0	5.793	2	3	2	2	2	3	2	1	Q58A65;Z4YMB8;A0A0R4J196;F8WH31;E9PUD1;E9Q6B6;E9Q6E0;J3QNR6;K3W4S4;Q9ESN9	Q58A65;Z4YMB8;A0A0R4J196;F8WH31;E9PUD1	C-Jun-amino-terminal kinase-interacting protein 4
Eif2a	3.81696	3.13165	0.000107444	11.8957	13.4333	12.444	16.5717	16.0162	16.6361	No	Yes	23.0024	0	18.532	8	4	2	4	2	3	4	4	Q8BJW6;D6RFN2;D6RGA6;D3YZZ6	Q8BJW6;D6RFN2;D6RGA6	Eukaryotic translation initiation factor 2A;Eukaryotic translation initiation factor 2A, N-terminally processed
Hdlbp	3.81673	4.59406	0.000316027	14.8297	15.0299	14.798	18.791	18.3314	18.9853	No	Yes	24.2945	0	79.64	44	17	9	10	9	16	14	14	Q8VDJ3;A0A087WP83;A0A087WQY9;A0A087WPC5;A0A087WS92	Q8VDJ3;A0A087WP83	Vigilin
Ighv1-42;Ighv1-31	3.81641	2.23092	0.000296769	15.2039	14.9259	14.6697	19.5192	17.0426	19.687	No	Yes	26.7363	0	62.566	10	3	2	2	1	3	3	3	A0A075B5V6;A0A075B5V1;P06330;P01757;P01756;A0A075B5V7;A0A075B5U6;A0A0A6YY38;A0A0A6YXN5;A0A0A6YX66;A0A0A6YWK5;A0A075B5V2;A0A075B5V0;A0A075B5U7	A0A075B5V6;A0A075B5V1;P06330;P01757;P01756	Ig heavy chain V region AC38 205.12;Ig heavy chain V region J558;Ig heavy chain V region MOPC 104E
Sec23a	3.81612	2.58409	0.000158317	13.0493	13.5039	11.3564	16.5066	16.0465	16.8048	No	Yes	23.0158	0	25.717	16	7	5	6	2	6	6	5	E9Q1S3;Q01405	E9Q1S3;Q01405	Protein transport protein Sec23A
Slc39a11	3.81371	2.43971	0.000142857	6.94821	9.30111	8.592	12.6674	11.6963	11.9187	Yes	Yes	23.1569	0	4.1806	1	1	0	0	0	1	1	1	B1ARC5;B1ARC2;Q8BWY7	B1ARC5;B1ARC2;Q8BWY7	Zinc transporter ZIP11
Manba	3.81324	2.96063	9.24703e-05	13.2871	13.7607	13.3356	16.7176	16.7851	18.3205	No	Yes	23.8044	0	16.821	21	9	4	5	5	7	6	9	A0A0R4J092;Q8K2I4;D6RGR1	A0A0R4J092;Q8K2I4	Beta-mannosidase
Rpl19	3.81117	4.36723	0.000267176	16.3619	16.3083	15.8904	20.088	19.646	20.26	No	Yes	29.5231	0	3.3188	5	3	1	1	1	2	3	2	A2A547;P84099	A2A547;P84099	Ribosomal protein L19;60S ribosomal protein L19
Olfm4	3.81001	1.96325	0.000433393	10.3559	11.265	9.61505	15.0386	13.4054	NaN	Yes	Yes	21.385	0	6.3089	2	2	0	2	0	2	1	0	D3YYD0;Q3UZZ4	D3YYD0;Q3UZZ4	Olfactomedin-4
Prdx5	3.80984	4.95697	0.000220994	18.5406	18.622	18.2352	22.4014	22.0379	22.388	No	Yes	30.0941	0	97.611	70	12	9	10	9	12	12	12	P99029;G3UZJ4;H3BJQ7;A0A494BAZ4	P99029;G3UZJ4;H3BJQ7;A0A494BAZ4	Peroxiredoxin-5, mitochondrial
Kars	3.80921	3.27491	0.000118443	13.5678	14.8091	13.8483	17.7237	17.561	18.3681	No	Yes	23.8815	0	18.257	28	10	3	5	4	8	8	9	Q8R2P8;Q99MN1	Q8R2P8;Q99MN1	Lysine--tRNA ligase
Fam98b	3.80884	4.29372	0.000256881	12.822	13.0154	12.8204	16.9787	16.2232	16.8825	No	Yes	24.2801	0	10.431	11	4	2	2	3	3	4	4	Q80VD1	Q80VD1	Protein FAM98B
Bzw2	3.80879	5.22004	0.000250784	13.747	13.9414	13.8577	17.5129	17.538	17.9216	No	Yes	24.8411	0	38.59	25	8	4	6	5	7	7	7	Q91VK1;A0A1Y7VM24;A0A1Y7VM47;A0A1Y7VIU9;A0A1Y7VKZ4;A0A1Y7VJ43	Q91VK1	Basic leucine zipper and W2 domain-containing protein 2
Lars	3.80705	4.26427	0.00025	13.5784	13.8669	13.3667	17.6236	17.0033	17.6063	No	Yes	23.2496	0	34.216	27	13	5	8	5	13	12	13	Q8BMJ2;A0A494BBF9	Q8BMJ2	Leucine--tRNA ligase, cytoplasmic
Tmed7	3.80607	2.72814	0.000118172	13.6581	13.8565	12.0424	16.7209	16.756	17.4982	No	Yes	24.2665	0	6.1092	11	3	2	3	1	3	3	3	E9Q7G1;D3YZZ5	E9Q7G1;D3YZZ5
Tbc1d15	3.80464	3.29721	0.000121003	11.9529	11.376	10.9779	14.7396	15.8908	15.0904	No	Yes	22.3177	0	14.292	4	4	3	2	1	3	2	3	Q9CXF4	Q9CXF4	TBC1 domain family member 15
Armc10	3.80462	3.13636	0.000107034	13.6896	14.3843	12.9267	17.0555	17.4486	17.9104	No	Yes	25.9747	0	68.618	20	5	3	4	2	4	5	5	Q9D0L7;D3Z5T2	Q9D0L7;D3Z5T2	Armadillo repeat-containing protein 10
Sec11c	3.80325	3.40303	0.000128795	12.6501	13.6024	13.7509	17.3553	16.6744	17.3833	No	Yes	24.9353	0	14.405	16	5	2	5	4	5	5	5	D3Z5H3;Q9D8V7;D6RFV4;A0A494BAT3	D3Z5H3;Q9D8V7;D6RFV4	Signal peptidase complex catalytic subunit SEC11C
Golga2	3.80239	2.80388	8.20633e-05	12.2448	12.6714	10.7457	15.7036	15.4573	15.9082	No	Yes	21.5657	0	7.13	5	3	2	3	1	3	3	3	Z4YJU8;A0A6I8MWY5;E9PUQ5;A0A6I8MX07;Q921M4;A2AN46	Z4YJU8;A0A6I8MWY5;E9PUQ5;A0A6I8MX07;Q921M4	Golgin subfamily A member 2
Gcn1l1	3.80229	4.30472	0.00025641	13.3454	13.2135	12.8274	16.9388	16.6013	17.2531	No	Yes	21.3216	0	45.691	33	16	7	6	6	15	13	14	E9PVA8	E9PVA8
Tnfaip8	3.80221	3.17318	0.00010989	8.30193	9.83515	9.43678	13.2478	12.8316	12.901	Yes	Yes	21.9037	0.0089905	1.2008	1	1	0	0	1	1	1	1	D3YWJ5;D3Z312;J3QNA5;J3QM73	D3YWJ5;D3Z312;J3QNA5
Ndufv3	3.80211	2.66159	0.000166579	12.5433	13.5813	11.7559	17.0952	15.7606	16.4311	No	Yes	22.6316	0	11.002	8	2	2	2	2	2	2	2	Q8BK30	Q8BK30	NADH dehydrogenase [ubiquinone] flavoprotein 3, mitochondrial
Cyp2s1	3.80186	2.41111	0.000174757	10.9688	8.48151	10.1335	13.5473	13.3244	14.1178	Yes	Yes	20.4347	0.002702	1.6219	2	2	1	0	0	2	2	2	D3Z7F1;Q9DBX6	D3Z7F1;Q9DBX6	Cytochrome P450 2S1
Commd7	3.80162	3.5966	0.0001322	9.33587	NaN	8.94778	13.0184	12.6681	13.1438	No	Yes	21.8664	0.0037373	1.5097	2	1	1	0	1	1	1	1	A2AU52;Q8BG94	A2AU52;Q8BG94	COMM domain-containing protein 7
Uba7	3.80111	2.36522	0.000208172	NaN	10.7724	9.31544	13.7954	13.4776	14.262	No	Yes	20.2371	0	9.2672	4	3	0	2	1	3	3	3	Q9DBK7;H3BJA7	Q9DBK7;H3BJA7
Cc2d1b	3.79995	3.1997	0.00011191	11.7823	12.0138	10.6522	15.2872	14.9208	15.6403	No	Yes	22.1578	0	3.6749	6	3	2	2	1	3	2	2	F6XC25;Q8BRN9	F6XC25;Q8BRN9	Coiled-coil and C2 domain-containing protein 1B
Edf1	3.79953	3.28514	0.000118745	13.352	14.1843	12.7202	17.0695	17.0939	17.4918	No	Yes	25.2559	0	15.246	11	4	3	3	2	2	2	2	Q9JMG1	Q9JMG1	Endothelial differentiation-related factor 1
Qil1	3.79902	1.87087	0.000450781	8.54103	11.6352	8.53364	12.8092	13.1191	14.1786	Yes	Yes	23.2567	0	5.6577	7	2	0	1	0	1	1	1	Q8R404	Q8R404	Protein QIL1
Cd44	3.79893	3.25408	0.00011599	15.4092	16.0156	14.6855	19.2664	18.7113	19.5295	No	Yes	27.5545	0	27.051	30	5	3	5	3	5	5	5	Q3U8S1;A2APM5;A2APM3;A2APM4;E9QKM8;Q80X37;A2APM1;A2APM2;P15379	Q3U8S1;A2APM5;A2APM3;A2APM4;E9QKM8;Q80X37;A2APM1;A2APM2;P15379	CD44 antigen
Khdrbs1	3.79857	3.18144	0.00011041	16.0552	16.2131	15.3763	19.6965	18.9815	20.3623	No	Yes	27.4727	0	85.977	41	7	6	5	5	7	7	7	Q60749;A0A087WSL3;A0A087WR32;A0A2R8VJR4;Q9R226;Q9WU01	Q60749	KH domain-containing, RNA-binding, signal transduction-associated protein 1
Wars	3.79807	3.98283	0.000199715	12.9125	13.4536	12.6415	16.8192	16.4935	17.0892	No	Yes	23.44	0	33.583	15	6	3	4	3	5	5	5	P32921	P32921	Tryptophan--tRNA ligase, cytoplasmic;T1-TrpRS;T2-TrpRS
Psmc5	3.79724	3.96716	0.000197183	14.4807	15.3544	14.9762	18.8095	18.4351	18.9583	No	Yes	25.8691	0	84.83	47	16	7	9	10	14	14	16	P62196;Q8K1K2	P62196;Q8K1K2	26S protease regulatory subunit 8
Sf1	3.79691	3.47525	0.00013579	14.6917	15.106	14.2834	18.8196	17.8537	18.7985	No	Yes	24.8021	0	32.518	27	9	4	7	3	9	7	9	E9Q4Q2;D3YZC9;D3YZD0;Q64213;D3YVH4;F8WHF9;D6RDB7	E9Q4Q2;D3YZC9;D3YZD0;Q64213;D3YVH4	Splicing factor 1
Elane	3.79564	4.34888	0.000260223	16.7212	16.3926	16.478	20.701	19.9524	20.3254	No	Yes	28.4992	0	55.166	35	7	5	5	5	7	7	7	Q3UP87	Q3UP87	Neutrophil elastase
Atp5o	3.79503	3.43072	0.000130964	17.7189	18.0959	16.9765	21.224	21.0847	21.8677	No	Yes	29.5288	0	130.07	90	13	13	13	13	13	12	12	Q9DB20;A0A338P776;F7D3P8;A0A338P7G3;F6XVM5	Q9DB20	ATP synthase subunit O, mitochondrial
Kdm1a	3.7941	3.36609	0.000125	10.6204	11.9315	11.0605	15.1161	14.6511	15.2275	No	Yes	20.8884	0	7.4305	6	3	2	3	2	3	3	3	G8JL40;A3KG93;Q6ZQ88;F6ZC60;F6Z4I3	G8JL40;A3KG93;Q6ZQ88	Lysine-specific histone demethylase 1A
Crat	3.79408	2.87748	8.59423e-05	11.0205	11.9851	11.1367	15.1668	14.3431	16.0147	No	Yes	22.6804	0	11.802	7	5	1	2	1	4	4	5	H7BX88;P47934;B7ZDD7;A2AWJ5;F7BF80	H7BX88;P47934	Carnitine O-acetyltransferase
Nusap1	3.7927	2.15216	0.000337036	9.6653	10.4055	NaN	13.6068	14.8317	13.0458	No	Yes	22.0236	0	3.0002	2	2	1	1	0	1	2	2	Q9ERH4	Q9ERH4	Nucleolar and spindle-associated protein 1
Mta3;Mta1	3.79184	2.19831	0.000320629	NaN	11.6522	9.8404	14.7699	14.2276	14.6169	No	Yes	21.7721	0	5.9657	2	3	0	3	1	3	3	2	Q3U3A7;E9Q794;Q3UII8;Q924K8;F8WHY8;E9PX23;Q8K4B0;H3BLE1	Q3U3A7;E9Q794;Q3UII8;Q924K8;F8WHY8;E9PX23;Q8K4B0;H3BLE1	Metastasis-associated protein MTA3;Metastasis-associated protein MTA1
Far1	3.78952	1.75706	0.00066079	NaN	12.2774	9.57851	14.5415	14.5324	15.0785	No	Yes	23.1537	0	4.4458	6	2	0	2	1	2	2	2	D3Z5W6;D3Z4N9;Q922J9;D3Z072	D3Z5W6;D3Z4N9;Q922J9;D3Z072	Fatty acyl-CoA reductase 1
Fdps	3.78894	3.47617	0.000134875	12.5101	13.5473	12.4785	16.8405	16.268	16.7942	No	Yes	20.1718	0	10.112	17	5	3	4	3	5	4	4	A0A0G2JEA5;Q920E5;A0A0G2JDJ5;A0A0G2JEB3	A0A0G2JEA5;Q920E5;A0A0G2JDJ5;A0A0G2JEB3	Farnesyl pyrophosphate synthase
Dnajb4	3.78865	2.45201	0.000142535	12.1271	10.16	9.86782	14.0661	14.624	14.8308	No	Yes	20.4321	0	4.7293	4	2	2	1	1	2	2	2	Q9D832	Q9D832	DnaJ homolog subfamily B member 4
Dnaja2	3.787	4.46923	0.000273973	14.9643	15.0268	14.6155	18.404	18.5589	19.0046	No	Yes	26.0621	0	49.707	33	10	6	7	6	9	8	9	Q9QYJ0	Q9QYJ0	DnaJ homolog subfamily A member 2
Bclaf1	3.78686	2.95379	9.03809e-05	15.1747	15.4558	13.7863	18.547	18.3247	18.9056	No	Yes	25.4282	0	18.095	25	9	9	8	7	8	9	9	A0A087WQA0;F8WI22;Q8K019;A0A087WRN1	A0A087WQA0;F8WI22;Q8K019;A0A087WRN1	Bcl-2-associated transcription factor 1
Tor4a	3.78415	2.67242	0.000165445	8.62925	8.07087	8.87427	11.8139	NaN	12.804	Yes	Yes	19.4508	0	2.5253	1	1	0	0	0	1	0	1	Q8BH02	Q8BH02	Torsin-4A
Casp8	3.78295	4.04212	0.000204082	13.3134	13.9487	13.3005	17.1956	17.0507	17.6652	No	Yes	24.4757	0	28.138	26	10	4	5	4	7	8	8	A0A087WQT6;O89110	A0A087WQT6;O89110	Caspase-8;Caspase-8 subunit p18;Caspase-8 subunit p10
Pfkp	3.78185	3.87386	0.000180645	13.3656	12.4952	12.7566	16.6265	16.3635	16.9731	No	Yes	23.1696	0	27.076	14	5	4	1	3	5	4	4	Q9WUA3;Q8C605;F6YL81	Q9WUA3;Q8C605	ATP-dependent 6-phosphofructokinase, platelet type;ATP-dependent 6-phosphofructokinase
Pyhin1;BC094916	3.77824	4.33128	0.000251799	16.8013	17.0342	16.7228	20.4622	20.364	21.0669	No	Yes	27.9801	0	58.709	67	13	10	11	11	12	12	13	Q8BV49;A0A0A6YXV9;E9PVL3;Q504N7;E9QL87;A0A0R4J1R5	Q8BV49;A0A0A6YXV9;E9PVL3;Q504N7	Pyrin and HIN domain-containing protein 1;Pyrin and HIN domain-containing protein 1-like
Fam26f	3.77777	2.05019	0.000422423	9.53956	12.3392	12.4538	15.2248	14.8774	15.5636	No	Yes	23.3632	0.0087516	1.2144	2	1	1	1	1	1	1	1	Q8C9E8	Q8C9E8	Protein FAM26F
Rbm28	3.7774	2.63267	0.000160732	9.04691	9.32242	8.312	12.3179	11.8743	13.8213	No	Yes	19.8943	0	5.0942	3	2	1	1	1	1	1	2	Q8CGC6	Q8CGC6	RNA-binding protein 28
Ppa2	3.77727	2.10942	0.000406528	12.6732	11.5938	9.60409	15.1644	14.5883	15.4501	No	Yes	22.1341	0	3.1203	4	3	1	2	1	3	3	3	Q91VM9;D3Z636;G8JL76	Q91VM9;D3Z636;G8JL76	Inorganic pyrophosphatase 2, mitochondrial
Axl	3.776	3.42	0.000127621	11.5192	11.981	11.0156	15.0912	14.8865	15.8662	No	Yes	22.0136	0	15.349	4	3	1	2	1	2	3	3	Q00993;Q6PE80;F6YPR4	Q00993;Q6PE80	Tyrosine-protein kinase receptor UFO;Receptor protein-tyrosine kinase
G3bp2	3.77521	3.35199	0.000122915	12.4154	12.4456	11.9742	16.5429	15.2674	16.3505	No	Yes	21.3768	0	19.471	9	4	2	2	3	3	4	4	P97379;A0A0J9YUY8;A0A0J9YTQ8	P97379	Ras GTPase-activating protein-binding protein 2
Trim21	3.77339	3.27396	0.000115607	10.8006	10.2166	9.31223	13.8895	13.6987	14.0613	Yes	Yes	20.5798	0	10.124	4	2	1	0	0	2	2	2	Q3U7K7;Q62191	Q3U7K7;Q62191	E3 ubiquitin-protein ligase TRIM21
Blmh	3.77331	3.48967	0.000134486	14.0559	13.6577	13.0691	17.6115	16.835	17.6562	No	Yes	24.4535	0	50.143	22	7	4	4	3	7	6	6	Q8R016;E9PY26;E9Q6V3;E9PZH4	Q8R016;E9PY26	Bleomycin hydrolase
Cenpv	3.7733	2.6313	0.000160243	13.8678	12.7589	12.2248	17.3635	15.8524	16.9555	No	Yes	23.9669	0	18.09	16	6	5	5	4	4	4	5	Q9CXS4;F6SS03	Q9CXS4	Centromere protein V
Usp39	3.77327	2.6776	0.000166054	12.6996	13.8683	11.8417	17.0334	16.1304	16.5657	No	Yes	23.2	0	38.668	19	6	3	6	1	6	5	5	Q3TIX9	Q3TIX9	U4/U6.U5 tri-snRNP-associated protein 2
Tbl2	3.77271	3.75355	0.000162791	12.1383	12.7972	11.8972	16.3244	15.6631	16.1633	No	Yes	23.5106	0	9.8925	8	4	2	2	1	3	3	3	Q9R099	Q9R099	Transducin beta-like protein 2
Adh5	3.77259	4.16483	0.000223285	14.5196	14.8307	14.2822	18.1779	18.044	18.7283	No	Yes	25.1781	0	89.841	30	8	4	5	3	8	8	7	P28474;Q64437	P28474	Alcohol dehydrogenase class-3
Arfgap1	3.77233	1.91596	0.000456828	9.11394	7.75246	11.2183	13.7683	12.5364	13.097	Yes	Yes	21.0229	0	4.5634	1	1	0	0	1	1	1	1	V9GXM1;Q9EPJ9	V9GXM1;Q9EPJ9	ADP-ribosylation factor GTPase-activating protein 1
Ewsr1	3.76883	2.63447	0.000160406	14.0765	15.1545	13.082	18.2956	17.3506	17.9732	No	Yes	25.9003	0	13.058	11	2	2	2	2	2	2	2	Q5SUT0;Q5SUS9;Q61545	Q5SUT0;Q5SUS9;Q61545	RNA-binding protein EWS
Lamp1	3.76857	2.70624	0.000169255	16.893	18.416	16.3332	21.0351	20.789	21.1238	No	Yes	28.8211	0	38.414	34	6	4	4	4	6	5	5	P11438	P11438	Lysosome-associated membrane glycoprotein 1
Ikzf1	3.76695	4.62042	0.00029661	14.6705	14.8232	14.4745	18.3298	18.1791	18.7601	No	Yes	26.1533	0	9.9087	17	5	4	4	4	4	3	3	Q5SWU0;G5E8H3;Q5SWT9;Q03267;Q8C9X3;A0A087WQ51;A0A087WQ74;A0A087WNY4;A0A571BEH5;P81183;Q8C208	Q5SWU0;G5E8H3;Q5SWT9;Q03267	DNA-binding protein Ikaros
Psma2	3.76614	3.14877	0.000105105	15.7711	16.2804	14.7963	19.6893	19.0042	19.4527	No	Yes	27.3258	0	86.012	48	10	6	8	5	9	8	8	P49722;Q8BKE0	P49722;Q8BKE0	Proteasome subunit alpha type-2
Kif22	3.76613	3.70863	0.000154696	8.76949	8.65355	8.54411	12.0163	13.0905	12.1588	No	Yes	21.2721	0	8.0535	2	2	1	1	1	2	2	2	A0A0U1RPH8;Q3V300	A0A0U1RPH8;Q3V300	Kinesin-like protein KIF22
Glrx	3.76576	4.67151	0.00030837	15.0491	15.4898	14.8796	19.0095	18.9369	18.7694	No	Yes	27.8287	0	16.002	22	6	3	4	3	6	6	5	Q9QUH0;A0A1Y7VM65	Q9QUH0;A0A1Y7VM65	Glutaredoxin-1
Wibg	3.76408	3.09612	0.00010043	13.3587	13.4392	13.1984	17.6773	16.1228	17.4884	No	Yes	26.0813	0	4.1624	7	2	2	2	2	2	2	2	Q8CHP5	Q8CHP5	Partner of Y14 and mago
Skp1;Skp1a	3.76289	2.8706	8.41346e-05	13.61	11.8585	13.1358	16.6177	16.2538	17.0215	No	Yes	25.246	0	24.193	13	4	2	2	2	3	4	4	Q9WTX5;E9PUV4	Q9WTX5;E9PUV4	S-phase kinase-associated protein 1
Pa2g4	3.76261	3.81603	0.000169697	15.8574	16.2984	16.0405	20.1268	19.2378	20.1196	No	Yes	27.1019	0	81.823	51	13	7	6	6	12	11	12	P50580	P50580	Proliferation-associated protein 2G4
Snd1	3.76203	3.81342	0.000169287	15.99	16.7374	15.7445	20.09	19.6857	19.9823	No	Yes	25.8462	0	145.86	88	20	16	16	15	20	19	18	Q78PY7;Q3TJ56;E9Q3E9	Q78PY7;Q3TJ56	Staphylococcal nuclease domain-containing protein 1
Igf2r	3.7614	3.02866	9.45307e-05	11.9925	11.8092	11.5951	14.6429	15.6646	16.3735	No	Yes	20.9811	0.0047456	1.4037	4	2	2	1	2	2	2	2	Q07113	Q07113	Cation-independent mannose-6-phosphate receptor
Pold1	3.75769	3.90578	0.000179949	12.4413	12.8906	12.2187	16.0222	16.0636	16.7378	No	Yes	21.4182	0	25.518	18	8	5	6	5	6	8	8	P52431;D6RFB8;D3YVY8	P52431;D6RFB8	DNA polymerase delta catalytic subunit;DNA polymerase
Mccc1	3.75753	3.91922	0.000182055	12.5416	12.8875	12.9309	16.542	16.0671	17.0234	No	Yes	22.8644	0	36.081	12	7	2	3	4	6	6	6	Q99MR8;A0A0G2JF64;A0A0G2JFQ5	Q99MR8	Methylcrotonoyl-CoA carboxylase subunit alpha, mitochondrial
Acat2;Acat3	3.75718	4.10344	0.00020649	11.4521	11.5432	11.7153	15.7755	14.8745	15.3321	No	Yes	23.268	0	6.3438	5	3	2	2	2	3	3	2	G3XA25;Q8CAY6;Q80X81;A0A3B2WAL8	G3XA25;Q8CAY6;Q80X81	Acetyl-CoA acetyltransferase, cytosolic
Ola1	3.75659	4.2897	0.000238095	14.5743	14.8922	14.2469	18.5175	18.0173	18.4484	No	Yes	25.5233	0	25.086	22	9	6	6	7	8	6	6	Q9CZ30;B1AYJ9	Q9CZ30	Obg-like ATPase 1
Fkbp4	3.75641	3.5002	0.000133715	13.7781	14.9036	13.8448	18.0716	17.671	18.0531	No	Yes	24.8612	0	9.57	18	6	5	6	4	6	6	5	P30416;F6S2D5	P30416	Peptidyl-prolyl cis-trans isomerase FKBP4;Peptidyl-prolyl cis-trans isomerase FKBP4, N-terminally processed
Lyz2	3.75624	2.43836	0.000175066	17.5547	19.0485	16.6136	21.9147	21.1194	21.4515	No	Yes	30.6993	0	142.67	39	4	3	3	3	4	4	4	P08905	P08905	Lysozyme C-2
Plgrkt	3.75602	3.83119	0.000170524	13.9187	14.5442	13.7312	17.8243	17.4687	18.1691	No	Yes	26.3851	0	5.1556	9	3	3	3	3	3	3	2	Q9D3P8;D3YXU2;D3YV19;D3YY76	Q9D3P8	Plasminogen receptor (KT)
Mthfd1	3.75571	3.51252	0.000134745	15.0713	16.1607	15.0733	19.1239	19.0125	19.4361	No	Yes	25.5309	0	73.272	50	23	11	14	12	19	22	20	Q922D8;A0A1W2P733;A0A1W2P7L5	Q922D8;A0A1W2P733	C-1-tetrahydrofolate synthase, cytoplasmic;Methylenetetrahydrofolate dehydrogenase;Methenyltetrahydrofolate cyclohydrolase;Formyltetrahydrofolate synthetase;C-1-tetrahydrofolate synthase, cytoplasmic, N-terminally processed
Pin1	3.75549	2.07728	0.000398836	8.97196	10.9803	8.26193	13.7339	12.1881	13.5586	Yes	Yes	21.9914	0.00028802	2.1556	0	1	0	1	0	1	1	1	Q9QUR7	Q9QUR7	Peptidyl-prolyl cis-trans isomerase NIMA-interacting 1
Ubl4a	3.755	2.30569	0.000270028	11.9541	11.4068	10.9592	13.7016	15.6924	16.1911	No	Yes	24.1822	0	3.7648	7	4	2	1	1	2	3	4	P21126	P21126	Ubiquitin-like protein 4A
Rps25	3.75441	4.47801	0.00026616	17.5908	17.7922	17.3176	21.1143	21.1934	21.6561	No	Yes	31.1171	0	11.545	31	5	5	5	5	5	5	5	A0A1L1SQA8;P62852	A0A1L1SQA8;P62852	40S ribosomal protein S25
Atad1	3.75426	2.3308	0.000222405	11.1158	12.1171	11.2372	15.2722	13.9582	16.5025	No	Yes	23.5228	0	2.5882	5	2	1	2	1	2	1	2	A0A494BAB5;A0A494B9Y0;Q9D5T0;A0A494B9L7	A0A494BAB5;A0A494B9Y0;Q9D5T0;A0A494B9L7	ATPase family AAA domain-containing protein 1
Smarca2	3.75126	3.85008	0.000172414	12.2528	13.0481	12.1702	16.0747	16.1237	16.5264	No	Yes	21.2233	0	13.847	10	5	2	4	2	4	4	5	Q6DIC0;H3BLH0;F2Z4A9;H3BJK2;E9QAB8;H3BKJ3;A0A140LHF4;A0A140LHP6;H3BK47;A0A140LID0;A0A140LIM0;A0A140LI14;Q9D007;A0A140LIQ9;A0A140LHE2;H3BLI4;H3BJI1;A0A140LHZ8;A0A140LIV3;A0A140LJK1;H3BJM2;H3BKN5;A0A140LHL7;A0A140LHJ8	Q6DIC0;H3BLH0;F2Z4A9;H3BJK2;E9QAB8	Probable global transcription activator SNF2L2
Nedd4	3.75042	2.7878	0.000119774	8.30568	10.22	9.12114	12.973	12.5843	13.3407	Yes	Yes	21.4491	0	4.6016	6	1	0	1	0	1	1	1	V9GXK3;V9GWV8;Q3V335;A0A571BEP7;P46935	V9GXK3;V9GWV8;Q3V335;A0A571BEP7;P46935	E3 ubiquitin-protein ligase NEDD4
Smpdl3a	3.74969	3.1412	0.000103169	11.8704	12.0134	10.7346	15.0461	15.0172	15.8041	No	Yes	23.0612	0	14.274	9	4	1	3	1	3	3	3	P70158	P70158	Acid sphingomyelinase-like phosphodiesterase 3a
Stk26	3.74952	3.89695	0.000177891	14.6192	14.7187	14.0969	18.2945	17.7878	18.6011	No	Yes	25.5544	0	61.103	31	11	8	8	6	11	11	11	A2AD84;Q99JT2;D3Z359;Q9Z2W1	A2AD84;Q99JT2	Serine/threonine-protein kinase 26
Slc4a1ap	3.74935	2.85276	8.28402e-05	10.4738	10.5637	9.34123	13.2469	13.7188	14.6611	Yes	Yes	21.3266	0	2.9013	2	1	0	0	1	1	1	1	E9Q1Q0;E9Q585;E9PX68	E9Q1Q0;E9Q585;E9PX68
Arl8a	3.74819	2.99153	9.08501e-05	12.1494	13.6754	12.5853	16.4595	16.1465	17.0486	No	Yes	24.1618	0	4.438	7	3	2	2	2	3	2	2	Q8VEH3;F6QKK2	Q8VEH3;F6QKK2	ADP-ribosylation factor-like protein 8A
Pcbp2	3.74795	3.88371	0.000175879	15.882	14.9357	15.6553	19.3005	19.0146	19.4016	No	Yes	27.1973	0	46.423	32	7	5	6	4	7	6	6	Q61990;B2M1R7;A0A2R8VI25;A0A2R8VHP9;Q3TT81;A0A2R8W6L5;A0A2R8VHY9;A0A2R8VHZ0;A0A2R8VI71;A0A2R8VI12;A0A2R8VJY1;A0A2R8VHG2;A0A2R8VHN3;A0A2R8VKF0;A0A2R8VKN0;A0A2R8VI73;A0A2R8VHL8;A0A2R8W6U6;P57722;E9Q7D8;A0A2R8VI92;A0A2R8VHI3;A0A2R8VI15;A0A2R8W6H3;G3UYM5	Q61990;B2M1R7;A0A2R8VI25;A0A2R8VHP9;Q3TT81;A0A2R8W6L5;A0A2R8VHY9;A0A2R8VHZ0;A0A2R8VI71;A0A2R8VI12;A0A2R8VJY1;A0A2R8VHG2;A0A2R8VHN3;A0A2R8VKF0;A0A2R8VKN0;A0A2R8VI73;A0A2R8VHL8	Poly(rC)-binding protein 2
Hnrnpul2	3.74762	4.23248	0.000226171	15.9395	16.1542	15.6612	19.545	19.3845	20.0682	No	Yes	26.5025	0	78.168	50	16	9	11	7	13	13	14	Q00PI9;A0A494BAL6	Q00PI9	Heterogeneous nuclear ribonucleoprotein U-like protein 2
Bin1	3.74749	3.26854	0.000113269	14.0939	14.3329	13.2154	17.83	17.0646	17.9901	No	Yes	24.0681	0	48.878	15	5	2	2	2	5	5	5	A0A3Q4EBK4;Q6P1B9;O08539;A0A3Q4EBR8	A0A3Q4EBK4;Q6P1B9;O08539	Myc box-dependent-interacting protein 1
Srsf6	3.74745	4.13562	0.000210843	16.0765	16.3749	15.9493	20.0551	19.4183	20.1696	No	Yes	27.3903	0	20.271	33	9	3	4	3	6	8	9	Q3TWW8;A0A0A6YXX6	Q3TWW8	Serine/arginine-rich splicing factor 6
Arf4	3.74735	3.93935	0.000182292	14.3634	14.8906	14.1316	18.345	17.8232	18.4594	No	Yes	26.998	0	13.124	12	3	1	3	1	3	3	3	P61750;F6UFB9;E9Q798	P61750;F6UFB9;E9Q798	ADP-ribosylation factor 4
Ranbp3	3.74687	4.24904	0.000228758	12.6468	13.4118	12.8687	16.8511	16.5244	16.7923	No	Yes	23.2809	0	22.351	14	4	2	2	2	4	4	4	A0A3B2WCL5;Q9CT10	A0A3B2WCL5;Q9CT10	Ran-binding protein 3
Oas3	3.74543	1.52372	0.000934316	11.3973	8.38908	7.07213	11.4225	13.614	13.0583	Yes	Yes	19.3855	0	8.6022	3	2	0	0	0	1	2	1	Q8VI93	Q8VI93	2-5-oligoadenylate synthase 3
Cd74	3.7451	3.42459	0.000125448	16.1126	16.843	15.8182	20.0249	19.5331	20.4511	No	Yes	27.757	0	47.295	40	9	5	5	5	8	9	9	P04441	P04441	H-2 class II histocompatibility antigen gamma chain
Gstz1	3.74509	2.86796	8.3383e-05	8.26859	8.64422	9.90002	12.9445	12.1266	12.977	Yes	Yes	20.1323	0	7.8702	5	1	0	0	0	1	1	1	A0A1Y7VNC1;A0A1Y7VJZ2;Q9WVL0	A0A1Y7VNC1;A0A1Y7VJZ2;Q9WVL0	Maleylacetoacetate isomerase
Rbm25	3.7444	3.3141	0.00011657	13.775	14.367	13.1656	17.4067	17.1322	18.0018	No	Yes	23.6484	0	27.213	18	6	3	5	3	5	5	5	S4R2B0;B2RY56;S4R2J1;S4R2A4	S4R2B0;B2RY56	RNA-binding protein 25
Mrpl1	3.74311	3.3893	0.000123131	11.5129	11.8484	11.1453	15.263	14.6152	15.8578	No	Yes	21.1557	0	3.7818	4	3	1	2	1	3	2	3	Q99N96;Q9D3F3	Q99N96;Q9D3F3	39S ribosomal protein L1, mitochondrial
Pdxdc1	3.74283	4.08215	0.000200861	10.0966	10.55	10.0999	14.4416	13.6973	13.8361	No	Yes	20.7476	0	6.117	3	2	1	2	1	2	2	2	Q99K01;A0A0R4J034;D3YZA7	Q99K01;A0A0R4J034;D3YZA7	Pyridoxal-dependent decarboxylase domain-containing protein 1
Adap2	3.74222	3.3886	0.000123023	10.7918	10.5396	11.5441	14.5483	15.2456	14.3083	No	Yes	22.5306	0	8.9174	10	2	1	1	2	2	2	1	Q8R2V5	Q8R2V5	Arf-GAP with dual PH domain-containing protein 2
Gnai3	3.74094	2.61882	0.000156668	12.98	14.0115	11.8689	16.8316	16.2392	17.0124	No	Yes	24.5134	0	52.8	9	3	2	2	1	3	3	3	Q9DC51	Q9DC51	Guanine nucleotide-binding protein G(k) subunit alpha
Copg1	3.74032	3.02633	9.28998e-05	14.5754	14.5116	13.1805	18.139	17.3623	17.9872	No	Yes	23.4715	0	85.956	31	11	7	9	6	10	11	11	Q9QZE5;Q7TNQ1	Q9QZE5	Coatomer subunit gamma-1
Tpp1	3.74027	3.83535	0.000168067	17.493	16.5153	17.1224	20.6747	20.6209	21.0559	No	Yes	27.4041	0	53.454	43	5	3	3	3	4	5	5	O89023	O89023	Tripeptidyl-peptidase 1
Txnl1	3.73999	3.60081	0.000140281	15.3059	14.8701	14.2409	18.5489	18.2139	18.8741	No	Yes	26.2498	0	39.663	22	9	5	4	4	9	7	9	A0A498WGD8;Q8CDN6;A0A494B955;A0A494BBI1;A0A494BB31	A0A498WGD8;Q8CDN6;A0A494B955;A0A494BBI1	Thioredoxin-like protein 1
Chd2	3.73964	3.29253	0.000114286	8.66382	8.58565	7.50259	11.8492	11.6927	12.429	No	Yes	17.7749	0.0055017	1.3345	1	1	1	1	1	1	1	1	E9PZM4	E9PZM4	Chromodomain-helicase-DNA-binding protein 2
Rela	3.73893	3.20688	0.00010761	13.1043	13.7685	12.2581	16.9337	16.4986	16.9154	No	Yes	24.4535	0	13.621	14	6	3	4	2	6	6	5	A0A494BA44;Q04207;Q4U113;A0A494B901	A0A494BA44;Q04207	Transcription factor p65
Rbbp7	3.73886	4.09383	0.000201439	13.5459	13.6815	12.9608	17.0181	16.94	17.4467	No	Yes	23.5176	0	8.5821	10	4	2	4	2	4	4	4	A2AFJ1;Q60973;A2AFI9;F6ZLC6;F6U539	A2AFJ1;Q60973;A2AFI9;F6ZLC6	Histone-binding protein RBBP7
Tomm5	3.73787	3.24661	0.0001044	NaN	13.2547	12.76	16.7841	16.407	17.0444	No	Yes	26.221	0	3.0071	8	3	1	1	1	3	3	3	B1AXP6	B1AXP6	Mitochondrial import receptor subunit TOM5 homolog
Dtymk	3.73784	3.52599	0.0001341	11.2647	11.9884	11.0822	15.2237	14.7142	15.6109	No	Yes	23.3105	0	2.7033	5	2	1	2	1	2	2	2	P97930;D3Z3R3	P97930;D3Z3R3	Thymidylate kinase
Ccdc88b	3.73638	4.16326	0.000212443	14.7131	14.9926	14.4697	18.4169	18.1182	18.8494	No	Yes	23.8293	0	47.729	35	18	12	11	11	14	17	16	Q4QRL3;A0A494BB08;A0A494B939	Q4QRL3;A0A494BB08	Coiled-coil domain-containing protein 88B
Ech1	3.73522	3.23926	0.000110149	13.4855	14.4462	13.3345	17.3799	17.0609	18.0312	No	Yes	25.1873	0	41.143	13	6	2	4	3	5	5	5	O35459;F7B227	O35459;F7B227	Delta(3,5)-Delta(2,4)-dienoyl-CoA isomerase, mitochondrial
Apoa4	3.73228	2.96667	8.86076e-05	12.6292	14.0954	12.9775	16.4922	16.9022	17.5046	No	Yes	23.9993	0	23.49	21	9	2	6	3	6	8	7	P06728	P06728	Apolipoprotein A-IV
Cops8	3.73061	4.14915	0.000206795	12.0286	12.1468	11.824	15.8033	15.2748	16.1132	No	Yes	23.897	0	5.647	10	3	1	2	2	3	3	3	Q8VBV7;A0A087WPM5	Q8VBV7	COP9 signalosome complex subunit 8
Cfp	3.7283	3.31354	0.000115037	14.1163	14.0667	13.831	17.5844	17.0902	18.5244	No	Yes	25.3039	0	64.227	15	6	5	4	4	5	6	6	P11680	P11680	Properdin
Pgp	3.72734	5.23229	0.000224719	12.7562	12.312	12.5897	16.1786	16.3513	16.31	No	Yes	23.7691	0	25.911	11	6	2	2	3	4	5	4	Q8CHP8	Q8CHP8	Phosphoglycolate phosphatase
Ehbp1l1	3.7262	1.88369	0.000471857	10.8208	11.6485	8.10513	13.8056	13.7253	14.2221	No	Yes	18.9941	0	20.216	8	4	1	3	1	3	4	3	E9QP49;A0A494BBL8;A0A494B9G7;G5E8Y6;A0A494BA91;Q99MS7	E9QP49;A0A494BBL8;A0A494B9G7;G5E8Y6;A0A494BA91;Q99MS7	EH domain-binding protein 1-like protein 1
Actbl2	3.72611	2.69471	0.000164327	13.8965	12.278	13.1155	15.9964	17.1135	17.3585	No	Yes	22.5513	0	3.8003	6	1	1	1	1	1	1	1	Q8BFZ3	Q8BFZ3	Beta-actin-like protein 2
Akr7a2	3.72474	2.73023	0.000168533	13.2768	14.2781	12.1601	17.0519	16.9541	16.8832	No	Yes	24.6007	0	16.364	14	6	4	4	1	6	6	5	Q8CG76	Q8CG76	Aflatoxin B1 aldehyde reductase member 2
Cc2d1a	3.72471	3.20832	0.000100575	9.53534	NaN	10.2257	13.5045	13.4411	13.8701	No	Yes	20.2932	0	5.203	3	3	1	0	2	2	3	3	E9PX94;Q8K1A6	E9PX94;Q8K1A6	Coiled-coil and C2 domain-containing protein 1A
Atp6v0a1	3.72412	3.00322	9.02062e-05	13.9682	13.698	13.6927	17.2214	16.8077	18.5023	No	Yes	23.9338	0	23.207	24	8	4	4	4	7	7	8	Q9Z1G4;K3W4T3;A2A599	Q9Z1G4;K3W4T3	V-type proton ATPase 116 kDa subunit a isoform 1;V-type proton ATPase subunit a
Rpl18a	3.72349	2.72048	0.000167196	13.87	13.9557	12.2208	16.9805	16.6934	17.543	No	Yes	26.6319	0	13.849	10	4	3	3	1	3	2	2	A0A1D5RME4;A0A1D5RLW5;A0A1D5RM85;P62717;A0A1D5RM79	A0A1D5RME4;A0A1D5RLW5;A0A1D5RM85;P62717	60S ribosomal protein L18a
Psme3	3.72307	3.11012	9.88701e-05	12.3409	13.4991	11.8834	16.2765	16.1957	16.4204	No	Yes	24.3814	0	18.581	15	5	2	4	1	5	5	5	P61290;A2A4J1;A2A4J3	P61290;A2A4J1;A2A4J3	Proteasome activator complex subunit 3
Snrpd2	3.72255	4.4162	0.00024911	16.6071	16.8938	16.3743	20.0538	20.3605	20.6286	No	Yes	29.5495	0	55.99	38	6	5	6	5	6	6	5	P62317	P62317	Small nuclear ribonucleoprotein Sm D2
Cog5	3.72222	4.13186	0.00015873	NaN	10.4041	10.3133	14.0965	13.8755	14.2707	No	Yes	20.8592	0	5.2619	2	2	0	1	2	2	2	2	Q8C0L8	Q8C0L8	Conserved oligomeric Golgi complex subunit 5
Dcxr	3.72213	3.91892	0.000175439	12.2792	12.1443	11.7816	15.8206	15.3258	16.2251	No	Yes	23.1942	0	8.0663	10	5	1	1	1	5	5	5	Q91X52;A2AC16	Q91X52;A2AC16	L-xylulose reductase
Dctn5	3.72167	2.05075	0.000420749	9.97818	9.09105	6.89868	12.8317	11.8535	12.4478	Yes	Yes	22.429	0	3.2048	3	1	0	0	0	1	1	1	H3BJ75;Q9QZB9	H3BJ75;Q9QZB9	Dynactin subunit 5
Pfdn5	3.72033	3.96155	0.000179718	13.9944	14.5102	13.6909	17.5109	17.7568	18.0889	No	Yes	26.8025	0	38.816	23	7	4	6	4	6	7	6	Q9WU28;E9PVG3;E9PZ62;E9Q093;E9Q5Q8;H7BWX1	Q9WU28;E9PVG3;E9PZ62	Prefoldin subunit 5
Tcea1	3.71952	4.6414	0.000278884	15.336	15.4819	14.9207	18.9455	18.8013	19.1503	No	Yes	26.7851	0	36.047	41	13	8	9	5	12	12	12	P10711;E9PYD5;B7ZCS4;F6XMY4;Q9QVN7	P10711;E9PYD5	Transcription elongation factor A protein 1
Ilf3	3.71735	4.10818	0.000198582	14.4455	14.9314	14.2573	18.1137	18.058	18.6146	No	Yes	24.8916	0	51.682	29	10	5	7	6	10	8	8	Q45VK5;A0A1L1STE4;Q9Z1X4;A0A1L1SQR7;A0A1L1SU19;Q91WM1	Q45VK5;A0A1L1STE4;Q9Z1X4	Interleukin enhancer-binding factor 3
Itgam	3.71562	4.08634	0.000195531	16.7979	16.8025	16.4456	20.8842	20.1246	20.1841	No	Yes	26.3662	0	269.19	108	29	21	23	18	28	26	24	E9Q604;G5E8F1;E9Q5K8;Q3U1U4;A0A0R4J1B4;P05555;D6RJ73	E9Q604;G5E8F1;E9Q5K8;Q3U1U4;A0A0R4J1B4;P05555	Integrin alpha-M
Hk3	3.71536	4.42744	0.000248227	15.7637	15.8308	15.745	19.8349	19.0818	19.5689	No	Yes	25.7855	0	74.906	58	18	12	13	11	17	15	16	Q3TRM8;E9Q8S8;E9Q3Z4;D6RFA3;D3Z2E4;P52792	Q3TRM8;E9Q8S8;E9Q3Z4	Hexokinase-3;Hexokinase
Gbp2	3.71494	4.11611	0.00019943	14.8357	14.9637	14.6412	18.2487	18.3111	19.0256	No	Yes	25.3735	0	97.805	45	10	5	5	6	9	8	10	Q9Z0E6;E9Q2N7;Q01514	Q9Z0E6	Interferon-induced guanylate-binding protein 2
Spin1	3.71433	4.51547	0.000260708	10.7693	10.2569	10.3758	14.4598	13.9834	14.1019	No	Yes	21.9578	0	3.5905	3	2	2	1	2	2	2	1	Q61142	Q61142	Spindlin-1
Ddx3x;Ddx3y;D1Pas1	3.71263	4.34156	0.000233723	16.8234	16.8594	16.4125	20.1946	20.2615	20.7771	No	Yes	27.0073	0	111.75	87	24	19	20	19	23	21	21	Q62167;Q62095;P16381;Q3V086;Q61496	Q62167;Q62095;P16381	ATP-dependent RNA helicase DDX3X;ATP-dependent RNA helicase DDX3Y;Putative ATP-dependent RNA helicase Pl10
Hdhd2;Ier3ip1	3.71238	1.83325	0.000559441	11.476	10.5036	9.24116	NaN	13.5261	14.7125	Yes	Yes	22.8043	0.0042497	1.4609	3	1	0	1	0	1	1	1	D6RI20;Q9CR20	D6RI20;Q9CR20	Immediate early response 3-interacting protein 1
Eif3a	3.71181	3.8275	0.000161476	16.2833	16.2402	15.5438	19.5043	19.5557	20.1427	No	Yes	25.361	0	57.581	57	22	15	15	12	19	21	19	P23116;A0A494B9I0	P23116	Eukaryotic translation initiation factor 3 subunit A
Dynlrb1	3.71147	4.56271	0.000265655	13.6854	14.0761	13.7119	17.3826	17.366	17.8592	No	Yes	26.4419	0	39.777	16	5	2	2	2	4	4	5	P62627;A2AVR9	P62627;A2AVR9	Dynein light chain roadblock-type 1
Sart3	3.71089	3.84122	0.00016317	13.3966	13.72	12.9163	17.0621	16.6919	17.4117	No	Yes	22.9881	0	8.3888	11	6	4	4	3	5	4	5	Q9JLI8	Q9JLI8	Squamous cell carcinoma antigen recognized by T-cells 3
Fscn1	3.70802	2.71101	0.000165013	11.642	11.059	10.0645	14.8758	13.8246	15.1891	No	Yes	21.4239	0	9.4814	4	2	1	1	1	2	1	2	Q61553;A0A0G2JDU7	Q61553;A0A0G2JDU7	Fascin
Kpna3	3.70697	2.71311	0.000165099	13.3533	13.47	11.7031	16.7963	16.0774	16.7735	No	Yes	24.2046	0	23.829	10	4	4	4	3	4	4	4	O35344	O35344	Importin subunit alpha-4
Tial1;Tia1	3.70597	3.98662	0.00018018	12.3444	11.597	11.6941	15.3502	15.5015	15.9017	No	Yes	23.7366	0	5.1468	4	2	2	2	1	1	2	2	Q921W2;P70318;A0A0N4SVR8;A0A0U1RPE1;A0A0U1RP00;A0A0N4SUX1;D6RGU1;D3YY02;A0A0U1RPD3;Q8CII5;D3Z3Y4;G5E8L2;Q80ZW7;D3Z4H6;P52912	Q921W2;P70318;A0A0N4SVR8;A0A0U1RPE1;A0A0U1RP00;A0A0N4SUX1;D6RGU1;D3YY02;A0A0U1RPD3;Q8CII5;D3Z3Y4;G5E8L2;Q80ZW7;D3Z4H6;P52912	Nucleolysin TIAR;Nucleolysin TIA-1
B2m	3.70565	3.41991	0.000122592	16.5735	17.3375	16.0893	20.3597	20.086	20.6715	No	Yes	29.6902	0	5.1477	17	2	2	2	2	2	2	2	P01887	P01887	Beta-2-microglobulin
Clpp	3.70527	3.5163	0.000129271	14.7111	14.9139	13.9411	18.2859	17.7937	18.6023	No	Yes	25.4994	0	35.237	24	8	5	6	4	8	6	6	O88696	O88696	ATP-dependent Clp protease proteolytic subunit, mitochondrial
Mrps30	3.70468	2.69804	0.000163055	9.10141	10.1655	8.14542	12.7477	12.5205	13.2581	Yes	Yes	19.6618	0	2.8876	6	1	0	0	0	1	1	1	Q9D0G0	Q9D0G0	28S ribosomal protein S30, mitochondrial
Mmrn1	3.70462	2.86278	8.13008e-05	15.3844	15.4336	14.7354	18.0863	18.7316	19.8493	No	Yes	24.9172	0	75.597	52	18	9	13	9	14	18	18	A0A0N4SVL8;G3UVV6;B2RPV6	A0A0N4SVL8;G3UVV6;B2RPV6	Multimerin-1
Alad	3.7035	2.74968	0.000168984	11.6614	12.6415	10.8559	14.9839	15.2609	16.0245	No	Yes	22.5348	0	10.01	8	4	2	4	1	3	4	4	P10518	P10518	Delta-aminolevulinic acid dehydratase
Sh3gl1	3.70278	3.53647	0.000131086	13.5307	14.2817	13.2775	17.208	17.151	17.8392	No	Yes	25.0818	0	62.095	23	11	5	7	6	9	10	10	Q62419;A0A3B2W7K0;A2ALV1;Q8BXU5;A2ALV3;Q62420	Q62419;A0A3B2W7K0	Endophilin-A2
Psip1	3.70147	5.95143	0.000289855	15.7194	15.7785	15.6304	19.5289	19.4475	19.2563	No	Yes	26.4588	0	42.2	47	13	7	9	7	13	11	10	Q99JF8;A2BI12;F6RB63	Q99JF8;A2BI12	PC4 and SFRS1-interacting protein
Zpr1	3.70129	3.35726	0.000116376	12.504	12.5053	12.1877	16.3092	15.3236	16.6681	No	Yes	23.5987	0	14.777	13	6	3	4	3	6	5	6	F8WHU9;Q62384	F8WHU9;Q62384	Zinc finger protein ZPR1
Arap1	3.69816	2.232	0.000316524	12.2	12.659	9.97141	15.48	15.4063	15.0386	No	Yes	21.0322	0	8.7056	9	6	3	5	1	6	4	4	Q4LDD4;E9PUB0;A0A1B0GSK4;D3YWW7	Q4LDD4;E9PUB0	Arf-GAP with Rho-GAP domain, ANK repeat and PH domain-containing protein 1
Dbi	3.69776	4.29762	0.000222576	16.6835	16.8028	16.6607	20.1609	20.198	20.8815	No	Yes	27.6932	0	86.513	18	6	3	2	3	5	6	5	P31786;Q4VWZ5;D3Z563;M0QWU8	P31786;Q4VWZ5;D3Z563;M0QWU8	Acyl-CoA-binding protein
Dnmt1	3.69748	4.24126	0.00021309	14.0767	14.4678	13.6778	17.9016	17.5912	17.8219	No	Yes	22.9565	0	36.836	28	14	8	11	9	13	12	14	P13864;J3QNW0	P13864;J3QNW0	DNA (cytosine-5)-methyltransferase 1;DNA (cytosine-5)-methyltransferase
Stip1	3.69685	4.06672	0.000189445	17.348	17.6483	16.8319	20.9486	20.7566	21.2136	No	Yes	27.5195	0	175.93	101	28	17	18	14	25	27	24	Q60864	Q60864	Stress-induced-phosphoprotein 1
C3	3.69622	4.05587	0.000187416	16.2022	16.4195	16.0214	20.3688	19.5119	19.8509	No	Yes	24.911	0	82.957	83	29	18	20	17	24	24	21	P01027;H3BL60;H3BKW9	P01027	Complement C3;Complement C3 beta chain;C3-beta-c;Complement C3 alpha chain;C3a anaphylatoxin;Acylation stimulating protein;Complement C3b alpha chain;Complement C3c alpha chain fragment 1;Complement C3dg fragment;Complement C3g fragment;Complement C3d fragment;Complement C3f fragment;Complement C3c alpha chain fragment 2
Srp54;Srp54c	3.69581	4.45454	0.000244755	12.9161	13.344	12.6559	16.6055	16.5642	16.8337	No	Yes	23.4218	0	67.781	24	9	3	4	3	7	8	7	P14576;E9PXC0;A0A1W2P809;A0A1Y7VJJ0	P14576;E9PXC0	Signal recognition particle 54 kDa protein
Eps15l1	3.69566	4.93438	0.000322581	13.5013	13.7156	13.2061	17.2308	17.0255	17.2537	No	Yes	23.9052	0	27.639	16	9	5	5	4	8	9	9	A0A1D5RLS1;Q60902	A0A1D5RLS1;Q60902	Epidermal growth factor receptor substrate 15-like 1
Acsl5	3.69428	3.52853	0.000129151	13.5089	13.6675	12.6031	16.7901	16.7702	17.302	No	Yes	23.4839	0	25.659	20	9	4	7	3	7	8	8	Q8JZR0;A0A286YCG4;A0A286YD68	Q8JZR0	Long-chain-fatty-acid--CoA ligase 5
Glul	3.69402	3.98884	0.000178799	15.2534	15.1913	14.8992	18.7712	18.3721	19.2828	No	Yes	26.6488	0	18.273	18	5	3	3	3	4	5	5	P15105;D3YVK1	P15105	Glutamine synthetase
Larp4b	3.69327	3.88413	0.00016568	10.4942	10.2408	9.90576	14.2977	13.4388	13.9841	No	Yes	20.9268	0.00084057	1.9408	4	2	1	1	1	2	2	2	Q6A0A2;A0A087WPU9	Q6A0A2;A0A087WPU9	La-related protein 4B
Dock8	3.69295	3.72133	0.000147213	14.9508	15.2214	14.4074	18.461	18.2035	18.994	No	Yes	23.5916	0	74.456	50	21	11	13	7	20	19	20	Q8C147;A0A0U1RNK7;E9PX48;A0A1L1SQR4;A2A9M5;A2A9M4;Q8VDR9;Q8R1A4	Q8C147	Dedicator of cytokinesis protein 8
Rnpep	3.69286	3.32063	0.000112903	13.7133	13.6853	12.5676	17.1464	16.6347	17.2637	No	Yes	22.4261	0	27.384	18	7	4	4	2	5	6	6	E9PYF1;Q8VCT3	E9PYF1;Q8VCT3	Aminopeptidase B
Cnot1	3.69036	1.90321	0.000474576	14.7317	11.7466	11.5818	16.1207	16.1167	16.8937	No	Yes	21.1889	0	9.5594	9	9	6	2	2	7	9	7	B7ZWL1;A0A1D5RMJ8;Q6ZQ08;A0A1D5RMD8;A0A1D5RML9;A0A1D5RMB6;A0A1D5RM04;A0A1D5RM03	B7ZWL1;A0A1D5RMJ8;Q6ZQ08	CCR4-NOT transcription complex subunit 1
Npl	3.69027	2.52723	0.000144622	11.2121	12.7872	13.3116	16.0489	15.6805	16.6524	No	Yes	23.3811	0	36.409	17	5	1	3	2	4	5	5	Q9DCJ9	Q9DCJ9	N-acetylneuraminate lyase
Zfml;Znf638	3.69013	2.94892	8.521e-05	11.6263	9.91642	10.6132	14.3207	14.1361	14.7694	No	Yes	20.174	0	4.4597	4	4	3	1	2	3	2	3	A0A0N4SV38;A0A0N4SVI8;E9QKZ7;A0A0N4SV80;E9QML5;Q61464;A0A0N4SVM8;Q3TZK9;A0A0N4SUP3	A0A0N4SV38;A0A0N4SVI8;E9QKZ7;A0A0N4SV80;E9QML5;Q61464;A0A0N4SVM8;Q3TZK9	Zinc finger protein 638
Sumo2	3.68955	4.50372	0.000250896	17.0114	17.2462	16.8814	20.6747	20.4558	21.077	No	Yes	31.6612	0	16.708	23	3	2	3	3	2	3	3	H7BWX9;D3Z794;P61957;G3UZX6;G3UZA7	H7BWX9;D3Z794;P61957	Small ubiquitin-related modifier 2
Cbr4	3.68686	1.65848	0.000819444	13.5172	9.3162	11.9965	14.9679	14.984	15.9385	No	Yes	23.4118	0	5.0407	7	3	3	1	2	2	2	3	Q91VT4;D3Z6C4	Q91VT4;D3Z6C4	Carbonyl reductase family member 4
Fabp4	3.68669	3.25594	0.000107527	13.4819	14.0232	13.833	16.6482	17.9352	17.8149	No	Yes	26.6381	0	12.435	16	6	3	4	4	5	6	6	P04117;A0A0A6YW05;A0A0A6YXB9;A0A0A6YXI2;P24526;O08716	P04117	Fatty acid-binding protein, adipocyte
Glo1	3.68566	3.9676	0.000174564	14.1163	14.4293	14.0815	17.6544	17.6035	18.4262	No	Yes	26.424	0	11.08	22	6	4	5	4	6	6	6	Q9CPU0;A0A494BAF7;A0A494BBE7;A0A494B970	Q9CPU0;A0A494BAF7;A0A494BBE7	Lactoylglutathione lyase
Mical1	3.68563	4.40308	0.000234899	14.1382	13.9404	14.4112	18.062	17.4978	17.9869	No	Yes	24.2537	0	26.882	18	8	5	5	5	7	8	7	Q8VDP3;E9PUI4	Q8VDP3;E9PUI4	Protein-methionine sulfoxide oxidase MICAL1
Rps17	3.68522	3.92945	0.000169492	16.6432	16.4729	15.8472	19.8122	19.8653	20.3414	No	Yes	28.3288	0	93.263	54	7	6	6	5	7	7	7	P63276	P63276	40S ribosomal protein S17
Abca9;Abca6	3.68476	2.0059	0.000446322	9.20136	12.2278	10.7624	14.3556	13.681	15.2092	No	Yes	19.1834	0	3.2863	4	2	1	2	1	2	2	2	Q8K449;Q8K441	Q8K449;Q8K441	ATP-binding cassette sub-family A member 9;ATP-binding cassette sub-family A member 6
Syne1	3.684	6.03738	0.00028777	12.9242	12.9021	12.7724	16.4052	16.6302	16.6153	No	Yes	19.1308	0	19.635	11	9	2	3	2	7	9	7	Q6ZWR6;A0A1L1STC6;A0A1L1SRV6	Q6ZWR6;A0A1L1STC6;A0A1L1SRV6	Nesprin-1
Pacsin2	3.68332	4.89599	0.000311804	13.6007	13.1793	13.4432	17.319	16.9706	16.9836	No	Yes	24.3328	0	20.725	16	7	3	4	2	6	7	5	Q9WVE8;A0A2R8W6S4;A0A338P6P7;Q3UP40;A0A2R8W750	Q9WVE8;A0A2R8W6S4	Protein kinase C and casein kinase substrate in neurons protein 2
Spr	3.68297	3.89719	0.000165094	15.0109	15.439	14.9747	18.6961	18.4513	19.326	No	Yes	26.7833	0	65.146	46	11	8	10	8	11	11	11	G3UXX3;Q91XH5;Q64105;G3UZ79	G3UXX3;Q91XH5;Q64105	Sepiapterin reductase
Mbd2	3.68245	1.835	0.000584718	NaN	11.1207	9.54352	15.1005	13.2061	13.7371	No	Yes	22.1283	0	8.69	4	2	0	1	1	2	1	1	Q9Z2E1	Q9Z2E1	Methyl-CpG-binding domain protein 2
Bpnt1	3.68216	2.62263	0.000153622	12.1319	13.7409	11.7965	16.3108	15.7777	16.6272	No	Yes	22.3124	0	8.9394	11	5	3	5	2	4	4	4	A0A1B0GRV0;Q9Z0S1;D3Z0E6;D3Z5X0	A0A1B0GRV0;Q9Z0S1;D3Z0E6	3(2),5-bisphosphate nucleotidase 1
Apbb1ip	3.68183	2.77999	0.000140541	14.2027	15.1733	13.8034	18.7922	17.3223	18.1104	No	Yes	25.616	0	36.183	23	7	5	7	3	7	6	6	Q8R5A3;S4R2K5;F2Z4B7;G5E867;F2Z3U3	Q8R5A3	Amyloid beta A4 precursor protein-binding family B member 1-interacting protein
Rps14	3.67925	4.36924	0.000228013	17.2835	17.454	16.9685	20.945	20.593	21.2057	No	Yes	30.694	0	95.032	37	10	4	6	4	8	10	10	P62264;D3YVF4;D3Z7I1;A0A494BAS4	P62264;D3YVF4;D3Z7I1	40S ribosomal protein S14
Eny2	3.67906	1.74597	0.000727742	9.44327	13.0655	9.65069	14.441	14.1295	14.626	Yes	Yes	24.2307	0	5.5535	3	1	0	1	0	1	1	1	A0A2I3BRK6;Q9JIX0	A0A2I3BRK6;Q9JIX0	Transcription and mRNA export factor ENY2
Golim4	3.67517	3.75815	0.000148148	10.6979	10.5242	10.1254	13.6553	14.102	14.6157	No	Yes	20.1807	0	3.5915	1	2	1	1	1	1	2	2	D3YVW2;Q8BXA1	D3YVW2;Q8BXA1	Golgi integral membrane protein 4
Snw1	3.67461	2.41993	0.000205346	13.5133	14.1379	11.9634	17.5051	16.2712	16.8621	No	Yes	23.3429	0	33.531	21	10	6	7	4	9	6	8	A0A0B4J1E2;Q9CSN1	A0A0B4J1E2;Q9CSN1	SNW domain-containing protein 1
Coro1a	3.67271	5.13574	0.000342298	20.2569	20.2034	20.0223	23.9382	23.5808	23.9818	No	Yes	31.2512	0	82.817	109	23	17	18	14	19	21	22	O89053;G3UYK8;A0A0U1RPY8;D3YW57;G3UX53;D3YXM2	O89053;G3UYK8	Coronin-1A;Coronin
Diap2;Diaph2	3.67262	3.60236	0.000133843	10.8947	10.3298	10.1525	13.5915	14.5103	14.293	No	Yes	19.9177	0	5.8805	3	5	2	2	2	3	3	3	E9Q4U7;Q6W4W7;O70566	E9Q4U7;Q6W4W7;O70566	Protein diaphanous homolog 2
Dpy30	3.67261	2.81484	0.000117386	13.2149	13.9231	12.8984	17.4077	16.0492	17.5973	No	Yes	26.2356	0	6.1275	11	2	1	2	1	2	2	2	Q99LT0	Q99LT0	Protein dpy-30 homolog
Rab32	3.67222	3.93472	0.000167866	14.9687	15.5952	15.4693	19.0221	18.6301	19.3977	No	Yes	25.0578	0	39.619	23	5	4	5	5	4	5	5	Q9CZE3;A0A1Y7VIZ0	Q9CZE3	Ras-related protein Rab-32
Gstk1	3.67111	2.40358	0.000226415	12.7764	12.9085	12.2665	17.6129	15.1274	16.2244	No	Yes	23.9428	0	11.763	16	6	2	2	3	6	5	4	Q9DCM2;A0A0N4SVE5	Q9DCM2;A0A0N4SVE5	Glutathione S-transferase kappa 1
Tbc1d17	3.67088	2.86644	0.000119235	NaN	10.757	10.2613	13.9401	13.873	14.7269	No	Yes	21.8645	0.0034778	1.5259	3	1	0	1	1	1	1	1	I6L974;Q8BYH7	I6L974;Q8BYH7	TBC1 domain family member 17
Naga	3.66989	3.96004	0.000170316	14.2046	14.0876	13.9065	17.4033	17.5235	18.2816	No	Yes	25.8228	0.008979	1.1928	5	1	1	1	1	1	1	1	A0A2R8VHC0;A0A2R8VHH9;Q3UZX5;A0A2R8VHU7;A0A2R8VHJ3;A0A2R8W742	A0A2R8VHC0;A0A2R8VHH9;Q3UZX5;A0A2R8VHU7
Pdcd6ip	3.66827	3.94981	0.000168675	16.6718	17.3224	16.8581	20.4909	20.3261	21.0401	No	Yes	26.6438	0	131.54	114	29	20	25	21	27	28	28	Q9WU78	Q9WU78	Programmed cell death 6-interacting protein
RtcA;Rtca	3.66747	2.82704	0.000118106	8.8491	10.6508	9.07649	13.2809	13.1027	13.1953	Yes	Yes	21.0508	0	2.8086	2	2	0	2	0	2	2	2	Q9D7H3;D3Z263	Q9D7H3;D3Z263	RNA 3-terminal phosphate cyclase
Akap8	3.66735	5.024	0.000324074	12.7229	12.8636	12.8065	16.3977	16.2463	16.751	No	Yes	23.839	0	7.2403	11	4	2	2	2	2	3	3	Q9DBR0;A0A494BAZ0;A0A494B9I1	Q9DBR0;A0A494BAZ0;A0A494B9I1	A-kinase anchor protein 8
Eif4g2	3.66612	4.121	0.000190217	12.3527	11.9877	12.2597	16.2014	15.4058	15.9912	No	Yes	22.031	0	8.6954	9	6	3	3	3	6	6	6	F7CBP1;G3XA17;Q62448	F7CBP1;G3XA17;Q62448	Eukaryotic translation initiation factor 4 gamma 2
Rps21	3.66598	3.89548	0.00016129	15.9592	16.2147	15.2928	19.5058	19.2755	19.6834	No	Yes	29.08	0	37.902	27	5	5	5	4	4	5	4	Q9CQR2	Q9CQR2	40S ribosomal protein S21
Ap3d1	3.66596	4.20811	0.0002	13.4105	13.1773	12.7906	16.4652	16.8671	17.044	No	Yes	22.4181	0	26.825	24	8	3	3	3	6	7	7	O54774;A0A1W2P6Q6	O54774	AP-3 complex subunit delta-1
Cd209b	3.66343	2.79935	0.000141304	14.664	14.7276	14.9002	17.4592	18.378	19.4449	No	Yes	26.142	0	32.515	24	7	4	6	5	6	7	6	Q8CJ91;Q8CJ85	Q8CJ91;Q8CJ85	CD209 antigen-like protein B
Iqgap2	3.66323	3.80494	0.000150215	15.2678	15.4584	15.1562	18.6235	18.687	19.5615	No	Yes	24.4814	0	59.793	33	15	5	8	7	13	13	15	Q3UQ44	Q3UQ44	Ras GTPase-activating-like protein IQGAP2
Psmc2	3.66238	4.50268	0.000241796	15.4248	15.6475	15.4037	19.0496	18.8825	19.5311	No	Yes	26.0815	0	83.089	54	19	9	11	10	15	16	17	P46471;Q8BVQ9	P46471;Q8BVQ9	26S protease regulatory subunit 7
Wdr1	3.66237	3.04305	8.93997e-05	18.1665	18.7742	17.3471	21.685	21.3206	22.2692	No	Yes	28.4946	0	219.98	92	19	18	18	16	17	18	16	O88342;A0A0J9YU05	O88342	WD repeat-containing protein 1
Eprs	3.66157	4.40257	0.000226537	15.673	16.1595	15.6586	19.5424	19.2124	19.721	No	Yes	25.0421	0	122.53	68	22	11	19	15	21	21	20	Q8CGC7	Q8CGC7	Bifunctional glutamate/proline--tRNA ligase;Glutamate--tRNA ligase;Proline--tRNA ligase
Fubp1	3.66144	4.18901	0.000196353	15.8892	16.1909	15.5342	19.6912	19.2029	19.7045	No	Yes	26.2931	0	90.714	59	16	10	13	8	15	16	15	A0A0G2JG00;Q3TUE1;A0A0G2JGW9;A0A0G2JFY5;Q3UUU2;Q91WJ8;A0A0G2JFK2;A0A0G2JG96;A0A0G2JGV9	A0A0G2JG00;Q3TUE1;A0A0G2JGW9;A0A0G2JFY5;Q3UUU2;Q91WJ8;A0A0G2JFK2	Far upstream element-binding protein 1
Nipbl	3.66112	1.52611	0.000931172	12.5564	12.3392	8.76367	13.5698	15.2407	15.8321	No	Yes	19.181	0	3.137	6	3	2	2	1	1	3	3	Q6KCD5	Q6KCD5	Nipped-B-like protein
Ptpn11	3.66052	3.92789	0.000164319	13.26	13.1914	13.3366	16.5294	16.7514	17.4888	No	Yes	22.7014	0	23.238	13	6	4	3	3	4	6	6	P35235	P35235	Tyrosine-protein phosphatase non-receptor type 11
Dhrs1	3.65846	3.85008	0.000153677	16.7094	16.567	16.5031	19.953	19.9493	20.8525	No	Yes	27.852	0	27.551	41	12	9	10	9	11	11	11	Q99L04	Q99L04	Dehydrogenase/reductase SDR family member 1
Lama5	3.65812	2.86837	0.000120729	11.1603	10.9437	10.359	13.7971	14.1902	15.4501	No	Yes	19.4492	0	10.462	2	2	1	1	1	1	2	2	Q61001	Q61001	Laminin subunit alpha-5
Xpo7	3.65667	1.87338	0.000509896	NaN	11.4006	9.7694	13.322	14.3096	15.0935	No	Yes	20.8522	0	16.937	3	2	0	2	1	1	2	2	E9PUW7;Q9EPK7;A0A2I3BQV5	E9PUW7;Q9EPK7;A0A2I3BQV5	Exportin-7
Nt5c3b	3.65617	1.98642	0.000462557	11.0393	8.51202	7.86305	12.856	12.4586	13.0684	Yes	Yes	20.617	0	2.692	3	1	0	1	0	1	1	1	Q3UFY7	Q3UFY7	7-methylguanosine phosphate-specific 5-nucleotidase
Ctnna1	3.65534	2.64998	0.000154222	11.688	13.697	12.8942	16.4913	15.9564	16.7975	No	Yes	22.9851	0	8.4108	11	6	1	2	3	4	6	5	P26231;A0A494BAD0;Q65CL1	P26231	Catenin alpha-1
Ppie	3.65477	2.36493	0.000239737	10.0342	11.535	NaN	14.4702	14.1576	14.6903	No	Yes	21.5208	0	5.5861	5	3	1	1	0	2	3	2	Q9QZH3	Q9QZH3	Peptidyl-prolyl cis-trans isomerase E
Smarcc2	3.65469	3.24875	0.000104634	14.0733	14.958	13.8179	17.7684	17.5795	18.4653	No	Yes	23.3947	0	26.317	29	13	5	7	6	10	12	11	Q6PDG5;Q3UID0;A0A1W2P6N7	Q6PDG5;Q3UID0	SWI/SNF complex subunit SMARCC2
Npc2	3.65314	3.88711	0.000156775	17.4618	17.4964	17.1024	20.5896	20.9134	21.517	No	Yes	30.0032	0	28.176	32	8	6	6	5	6	7	6	Q9Z0J0	Q9Z0J0	Epididymal secretory protein E1
Ccdc137	3.65303	2.99061	8.38323e-05	11.5717	11.6987	11.5615	NaN	14.7864	15.741	No	Yes	23.1712	0.0047506	1.4103	2	1	1	1	1	0	1	1	H3BLI5;Q8R0K4	H3BLI5;Q8R0K4	Coiled-coil domain-containing protein 137
Ap2a1	3.65232	3.98659	0.000169903	12.7239	13.1066	12.4734	16.353	16.0876	16.8203	No	Yes	21.8052	0	16.057	18	8	5	5	4	8	6	7	P17426;A0A140LIG7;A0A140LHG0;A0A0J9YUA7	P17426	AP-2 complex subunit alpha-1
Spg20	3.6521	3.42114	0.000117155	11.1182	10.8861	10.4535	14.7478	13.7889	14.8773	No	Yes	21.7422	0	3.8138	5	2	2	2	1	2	2	2	D3Z3F8;Q8R1X6	D3Z3F8;Q8R1X6	Spartin
Tjp2;Tjp3	3.65135	3.76702	0.00014553	10.5532	10.3996	10.2652	13.4505	14.2477	14.4739	No	Yes	20.3841	0.00056354	1.9813	3	2	2	2	2	2	2	2	A0A3B2WBH9;A0A3B2WCN9;Q9Z0U1;Q921G9;Q9QXY1	A0A3B2WBH9;A0A3B2WCN9;Q9Z0U1;Q921G9;Q9QXY1	Tight junction protein ZO-2;Tight junction protein ZO-3
Bckdha	3.65102	1.63726	0.000833647	9.6737	10.8087	NaN	14.3426	12.3466	14.9876	No	Yes	21.4702	0	5.5656	3	2	1	2	0	2	1	2	Q3U3J1;P50136	Q3U3J1;P50136	2-oxoisovalerate dehydrogenase subunit alpha, mitochondrial
Lcn2	3.65096	3.54737	0.000126354	17.2914	18.0953	17.5147	21.8279	21.1045	20.922	No	Yes	29.7682	0	27.962	43	7	6	7	6	6	7	6	P11672;A0A0A6YW77	P11672;A0A0A6YW77	Neutrophil gelatinase-associated lipocalin
Mrpl2	3.65089	1.91526	0.000473453	7.39495	10.7215	9.40661	13.126	12.091	13.2587	Yes	Yes	21.0487	0	9.9564	1	1	0	1	0	1	1	1	B1B1D8;Q9D773	B1B1D8;Q9D773	39S ribosomal protein L2, mitochondrial
Ufc1	3.65009	3.95738	0.000166468	12.2412	12.3958	12.255	15.6312	15.6994	16.5118	No	Yes	25.5366	0.0029682	1.6079	6	1	1	1	1	1	1	1	M0QWS4;Q9CR09	M0QWS4;Q9CR09	Ubiquitin-fold modifier-conjugating enzyme 1
Asah1	3.6475	4.44996	0.000229133	18.6259	19.0452	18.3099	22.2976	22.2609	22.3651	No	Yes	29.6709	0	111.81	175	20	13	13	12	14	20	19	Q9WV54;D3Z505	Q9WV54	Acid ceramidase;Acid ceramidase subunit alpha;Acid ceramidase subunit beta
Eif3c	3.64739	4.62636	0.000255474	15.3536	15.7163	15.4723	18.9817	19.0176	19.4852	No	Yes	25.4478	0	72.238	67	15	12	12	11	13	15	14	Q8R1B4;M0QWV3	Q8R1B4	Eukaryotic translation initiation factor 3 subunit C
Plin3	3.64729	3.08874	9.14435e-05	14.7384	14.9495	13.6047	18.4322	17.6203	18.182	No	Yes	24.1901	0	125.74	32	11	7	8	5	11	10	10	Q9DBG5;A0A3B2WCW2	Q9DBG5	Perilipin-3
Gbp4	3.64719	4.02143	0.000173697	12.9114	13.1018	12.6983	16.2779	16.3237	17.0514	No	Yes	23.1995	0	31.212	7	4	3	3	3	4	4	4	Q61107	Q61107	Guanylate-binding protein 4
Mylk	3.64677	5.05799	0.000320366	12.3662	12.5243	12.2998	16.0112	15.8263	16.293	No	Yes	21.5545	0.00083846	1.909	5	2	1	1	1	2	2	2	B1B1A8;Q6PDN3	B1B1A8;Q6PDN3	Myosin light chain kinase, smooth muscle;Myosin light chain kinase, smooth muscle, deglutamylated form
Rangap1	3.64652	4.19923	0.000194175	14.0807	14.6588	14.0353	17.7362	17.7798	18.1984	No	Yes	25.1097	0	46.796	29	15	7	8	7	12	12	12	P46061;A0A2R8VHK9;A0A2R8W753	P46061	Ran GTPase-activating protein 1
Arf6	3.64539	3.13413	9.02643e-05	12.4995	12.9316	NaN	16.25	16.056	16.7768	No	Yes	21.6261	0	2.9433	9	2	1	1	0	2	2	1	P62331	P62331	ADP-ribosylation factor 6
Hsp90b1	3.64505	4.0057	0.000171569	21.0323	20.9954	20.5168	24.5174	24.0939	24.8683	No	Yes	30.7464	0	323.31	268	44	33	34	24	41	43	39	P08113;F7C312	P08113;F7C312	Endoplasmin
Eno1	3.64466	4.0233	0.000173053	20.2259	20.5328	19.723	23.8752	23.5306	24.0099	No	Yes	30.5969	0	214.93	230	24	20	23	19	22	23	21	P17182;Q6PHC1;B0QZL1;B1ARR7;D3Z2S4;A0A0N4SUX5;P17183;A0A0N4SUI6;B1ARR6;D3YVD3;D3Z6E4;A0A0N4SUW8	P17182;Q6PHC1;B0QZL1	Alpha-enolase;Enolase
Dock5	3.6433	1.74185	0.000782525	8.58098	11.2756	8.13414	11.7386	13.2551	13.927	Yes	Yes	17.2442	0	5.0607	4	2	0	1	0	1	2	2	B2RY04	B2RY04	Dedicator of cytokinesis protein 5
Tmem206	3.64285	2.40311	0.000224159	9.61336	11.5473	9.66042	13.8852	13.2811	14.5833	No	Yes	20.0309	0	4.9673	4	2	1	2	1	2	2	2	Q9D771	Q9D771	Transmembrane protein 206
Atxn10	3.64213	3.18803	9.89399e-05	10.1719	10.5865	10.9033	14.8204	13.45	14.3178	No	Yes	21.5229	0	3.9368	6	3	1	2	3	3	2	2	P28658	P28658	Ataxin-10
Psmc3	3.64156	2.94703	8.31848e-05	15.7388	15.9669	14.3584	18.9123	18.7886	19.288	No	Yes	25.7714	0	102.88	56	17	11	13	7	16	16	15	A2AGN7;B7ZCF1;O88685;A0A087WPH7;F6Q2E3	A2AGN7;B7ZCF1;O88685;A0A087WPH7	26S protease regulatory subunit 6A
Fkbp3	3.64104	4.26517	0.000200573	14.1029	14.3844	13.9292	17.8598	17.4022	18.0777	No	Yes	25.4615	0	9.0994	14	3	2	2	2	3	2	3	Q62446;A0A1Y7VMJ9;A0A1Y7VLK0;A0A1Y7VP01	Q62446;A0A1Y7VMJ9;A0A1Y7VLK0	Peptidyl-prolyl cis-trans isomerase FKBP3
Uqcrq	3.64068	3.29135	0.000106383	15.3596	15.9706	14.9599	18.865	18.6718	19.6754	No	Yes	28.5666	0	15.014	25	5	4	4	3	5	5	5	Q9CQ69;I7HPX6	Q9CQ69	Cytochrome b-c1 complex subunit 8
Stxbp2	3.63844	3.11033	9.24092e-05	14.7399	15.2411	13.8963	18.4859	17.734	18.5727	No	Yes	24.7504	0	43.693	33	13	9	9	5	13	13	12	F8WGM5;Q64324;A0A140LHM1;A0A140LJH9	F8WGM5;Q64324	Syntaxin-binding protein 2
Lyrm4	3.63839	3.20156	9.94318e-05	12.3968	13.3099	11.9987	16.232	15.805	16.5836	No	Yes	23.3531	0	2.7625	0	2	1	2	1	2	2	2	Q8K215	Q8K215	LYR motif-containing protein 4
Snapin	3.63768	2.06435	0.000436026	12.4767	13.5619	10.6711	15.1257	16.0739	16.4231	No	Yes	24.9886	0	7.3131	6	3	2	3	1	2	3	2	Q9Z266;V9GXI0;V9GXT7	Q9Z266	SNARE-associated protein Snapin
Vbp1	3.63763	2.38451	0.000239442	12.6751	13.0279	11.0874	16.1198	15.0347	16.5488	No	Yes	23.7893	0	10.587	9	5	2	4	1	4	4	4	P61759;Q3TIR6	P61759;Q3TIR6	Prefoldin subunit 3
Tceb1	3.63742	2.87764	0.000120113	14.0698	14.8437	13.7156	17.8923	17.0746	18.5745	No	Yes	26.3244	0	50.859	21	5	3	5	2	4	4	4	A0A087WQE6;A0A087WNT1;P83940;A0A087WPE4	A0A087WQE6;A0A087WNT1;P83940;A0A087WPE4	Transcription elongation factor B polypeptide 1
Limd2	3.63653	1.90923	0.000450934	NaN	13.2426	11.197	16.2118	15.2211	16.1361	No	Yes	24.2664	0.0087629	1.2175	6	2	0	2	1	2	2	2	Q8BGB5	Q8BGB5	LIM domain-containing protein 2
Sec61a1;Sec61a2	3.63498	4.02691	0.000172202	15.3949	14.9766	14.8824	18.8331	18.2861	19.0398	No	Yes	25.5105	0	6.5954	15	6	4	3	3	5	5	4	P61620;Q9CYJ6;Q9JLR1;A2ATT9;A0A0A6YVQ7	P61620;Q9CYJ6;Q9JLR1	Protein transport protein Sec61 subunit alpha isoform 1;Protein transport protein Sec61 subunit alpha isoform 2
Rdh11	3.63344	2.5572	0.000144095	11.2761	11.6653	11.0671	13.7902	15.1086	16.01	No	Yes	23.5772	0	11.953	3	2	1	1	1	1	2	2	Q9R1R8;Q9QYF1	Q9R1R8;Q9QYF1	Retinol dehydrogenase 11
Pnpo	3.63243	4.41048	0.000218409	12.9477	12.9946	12.5256	16.407	16.2039	16.7543	No	Yes	24.5093	0	4.4957	7	3	2	3	1	3	3	3	Q91XF0	Q91XF0	Pyridoxine-5-phosphate oxidase
Arfip1	3.62954	3.80289	0.000145985	11.6978	12.3084	11.5621	15.1175	15.4861	15.8533	No	Yes	23.3429	0	19.818	6	3	2	3	2	3	3	3	G5E8V9;E9QAY5;A2RSX9;E9Q3G5	G5E8V9;E9QAY5;A2RSX9;E9Q3G5
Ppm1h	3.62858	2.30282	0.000296178	9.58838	9.40661	8.51912	13.4044	12.1955	NaN	No	Yes	19.8318	0.0072501	1.2528	1	1	1	1	1	1	1	0	Q3UYC0	Q3UYC0	Protein phosphatase 1H
Fgd3	3.62794	4.05605	0.000173913	11.476	11.3844	12.2187	15.2158	15.3677	15.3794	No	Yes	21.5553	0	4.0987	3	3	1	1	2	3	3	2	O88842;Q3TNB8;A0A0R4J1D9	O88842;Q3TNB8	FYVE, RhoGEF and PH domain-containing protein 3
Adssl1	3.62741	3.7754	0.000143003	12.8535	13.3782	12.5604	16.8466	16.152	16.6757	No	Yes	23.6504	0	27.384	19	6	3	5	3	5	5	5	J3QN31;P28650	J3QN31;P28650	Adenylosuccinate synthetase isozyme 1
Serpine2	3.62615	3.13347	9.3147e-05	14.0159	13.8285	13.7552	16.6812	17.5248	18.272	No	Yes	24.5842	0	31.883	29	10	6	6	6	9	10	10	Q07235;A0A087WQ70;A0A087WQM1	Q07235;A0A087WQ70;A0A087WQM1	Glia-derived nexin
Apeh	3.62449	3.72071	0.000137795	14.5005	14.7161	13.9682	17.9557	17.6376	18.465	No	Yes	24.5365	0	38.552	23	7	5	7	4	6	7	7	Q8R146;A0A0R4J107;A0A0A6YXV0	Q8R146;A0A0R4J107	Acylamino-acid-releasing enzyme
Serpinb1a	3.6224	4.19513	0.000188425	17.8524	17.4366	17.4821	21.6135	20.9031	21.1218	No	Yes	28.5285	0	89.88	95	17	12	13	12	16	16	15	Q9D154;Z4YK03;Q8VHP7;Q5SV42	Q9D154	Leukocyte elastase inhibitor A
	3.62206	2.36515	0.000270468	10.7472	10.7462	NaN	15.0794	13.519	14.5078	No	Yes	24.4967	0	7.8839	3	1	1	1	0	1	1	1	A0A140T8P5	A0A140T8P5
Got1	3.62137	4.02817	0.000168878	14.4955	14.7041	14.1458	18.2832	17.631	18.2953	No	Yes	25.1158	0	46.327	24	7	4	6	5	7	7	7	P05201;F7ALS6	P05201	Aspartate aminotransferase, cytoplasmic
Cbr1	3.61996	3.38468	0.000111732	15.958	16.126	15.0938	19.1858	19.0339	19.818	No	Yes	27.1241	0	70.848	43	13	9	9	7	12	12	12	P48758;A0A338P684;A0A1B0GRG8	P48758;A0A338P684	Carbonyl reductase [NADPH] 1
Eci1	3.61907	2.75553	0.000162468	16.2354	15.7235	15.4163	18.563	19.2664	20.4031	No	Yes	27.0457	0	43.356	18	5	4	4	4	4	4	5	P42125;A0A3Q4EC00;A0A452J8A5	P42125;A0A3Q4EC00;A0A452J8A5	Enoyl-CoA delta isomerase 1, mitochondrial
Lrg1	3.6166	2.72477	0.000159194	12.7973	13.436	13.0536	17.8341	16.3099	15.9926	No	Yes	25.3397	0	12.969	10	4	3	4	4	4	3	3	Q91XL1	Q91XL1
Ifi35	3.61596	3.96497	0.00016	14.0117	14.1592	13.485	17.5949	17.1252	17.7837	No	Yes	25.3188	0	42.343	29	8	4	4	3	7	8	8	Q9D8C4;D6RFB1	Q9D8C4	Interferon-induced 35 kDa protein homolog
Aldh4a1	3.61408	3.37995	0.000110935	14.4474	14.1832	14.2161	18.135	17.1309	18.4229	No	Yes	25.3201	0	29.609	15	5	3	3	3	5	5	5	Q8CHT0	Q8CHT0	Delta-1-pyrroline-5-carboxylate dehydrogenase, mitochondrial
Clec2d	3.61227	2.11527	0.000431344	10.5199	10.7979	NaN	14.7019	13.8404	NaN	No	Yes	22.2511	0	6.5999	3	2	1	1	0	2	1	1	Q91V08	Q91V08	C-type lectin domain family 2 member D
Lrrfip2	3.61175	2.66355	0.000152805	12.5746	11.4067	10.922	15.9287	14.6146	15.1952	No	Yes	23.2165	0	5.9403	6	3	2	1	1	3	2	2	A0A0R4J169;E9QN52;A0A0G2JEP4;A0A0G2JFV5;A0A1L1SSC0;A0A668KLE1;Q91WK0;A0A0G2JDR6;A0A1L1SVG1;A0A1L1SQW1;A0A0G2JGZ1	A0A0R4J169;E9QN52;A0A0G2JEP4;A0A0G2JFV5;A0A1L1SSC0;A0A668KLE1;Q91WK0;A0A0G2JDR6;A0A1L1SVG1;A0A1L1SQW1;A0A0G2JGZ1	Leucine-rich repeat flightless-interacting protein 2
Lrp1	3.61061	3.6479	0.000130233	16.5637	16.7067	16.2612	19.852	19.7632	20.7483	No	Yes	23.7438	0	130.82	117	47	26	34	27	45	44	46	A0A0R4J0I9;Q91ZX7;Q3U5J2;D3Z5M3;A0A0N4SVX0	A0A0R4J0I9;Q91ZX7	Prolow-density lipoprotein receptor-related protein 1;Low-density lipoprotein receptor-related protein 1 85 kDa subunit;Low-density lipoprotein receptor-related protein 1 515 kDa subunit;Low-density lipoprotein receptor-related protein 1 intracellular domain
Rpp25l	3.6099	2.20834	0.000332201	9.00371	NaN	9.17345	11.825	12.6644	13.6061	No	Yes	21.8309	0.00056529	1.9902	2	1	1	0	1	1	1	1	Q99JH1	Q99JH1	Ribonuclease P protein subunit p25-like protein
Gipc1	3.60968	2.48808	0.000208801	9.46455	8.94795	8.44826	13.7383	11.5885	12.363	No	Yes	20.9046	0	5.3443	2	1	1	1	1	1	1	1	Q9Z0G0	Q9Z0G0	PDZ domain-containing protein GIPC1
Itgb2	3.60913	4.62039	0.000240137	18.8348	18.6141	18.5609	22.4294	21.9329	22.4749	No	Yes	28.273	0	274.74	167	30	25	28	25	30	29	29	Q542I8;P11835;M0QWA7;D3YYP8;D3Z1S4	Q542I8;P11835;M0QWA7	Integrin beta;Integrin beta-2
Strn3	3.60867	2.40504	0.00022314	NaN	12.1994	10.9547	14.8717	14.9986	15.6869	No	Yes	22.6968	0	3.6392	2	2	0	2	1	2	2	2	B2RQS1;Q9ERG2	B2RQS1;Q9ERG2	Striatin-3
Pf4	3.60866	3.44862	0.000115226	18.1555	18.0193	17.4276	20.8663	21.6677	21.8943	No	Yes	31.4337	0	8.8769	33	3	3	3	3	3	3	2	Q9Z126;A0A0J9YTR7	Q9Z126;A0A0J9YTR7	Platelet factor 4
Mcm2	3.60835	3.88213	0.000149893	12.7914	13.7215	13.533	17.1264	16.9013	16.8433	No	Yes	23.4553	0	19.732	25	9	4	5	3	9	9	7	P97310	P97310	DNA replication licensing factor MCM2
Nmral1	3.60775	3.36554	0.000109204	12.9123	13.3885	12.2343	16.17	16.2925	16.8959	No	Yes	24.4503	0	15.976	8	4	2	3	1	3	4	3	Q8K2T1;D3YU12;G5E8S7	Q8K2T1;D3YU12;G5E8S7	NmrA-like family domain-containing protein 1
Vta1	3.60611	2.85315	0.000142232	12.5281	13.6352	12.1769	16.7879	15.729	16.6416	No	Yes	23.9427	0	72.218	12	4	2	3	1	4	3	3	Q9CR26;F6W5Q8	Q9CR26;F6W5Q8	Vacuolar protein sorting-associated protein VTA1 homolog
Ppp3ca	3.60601	3.28595	0.000103321	14.4744	14.5502	13.4945	17.9988	17.2782	18.0601	No	Yes	25.1192	0	11.702	18	6	4	6	4	6	6	6	P63328;E9Q6P2;A0A2I3BPC5;P48455	P63328	Serine/threonine-protein phosphatase 2B catalytic subunit alpha isoform
Pdhx	3.6027	3.49594	0.000117944	14.2142	14.2157	13.5071	17.7038	17.0331	18.0082	No	Yes	24.4952	0	16.354	19	6	5	5	4	6	5	6	Q8BKZ9;A2AWH7;A2AWH8	Q8BKZ9	Pyruvate dehydrogenase protein X component, mitochondrial
Mapkapk3	3.60218	2.97379	8.07848e-05	9.73489	9.60337	NaN	12.8498	13.1727	13.7914	No	Yes	21.0486	0.0037393	1.5137	2	1	1	1	0	1	1	1	Q3UMW7	Q3UMW7	MAP kinase-activated protein kinase 3
Cdk9	3.60202	3.9821	0.000159453	11.1158	10.9787	10.6394	14.8799	14.0597	14.6004	No	Yes	22.3757	0	6.4717	2	2	1	1	1	2	2	2	Q99J95	Q99J95	Cyclin-dependent kinase 9
Gfpt1	3.60189	3.34205	0.00010728	12.2935	11.8317	11.0092	15.6002	15.2917	15.0482	No	Yes	22.0282	0	20.041	9	6	2	2	1	5	5	4	P47856;D3YYE0;D3YYD9;Q9Z2Z9	P47856	Glutamine--fructose-6-phosphate aminotransferase [isomerizing] 1
Map3k3	3.6013	1.71766	0.000775549	9.9735	8.69017	6.38516	11.4334	13.0444	11.3749	Yes	Yes	18.2281	0.0013691	1.7322	3	2	0	0	0	1	2	1	Q61084	Q61084	Mitogen-activated protein kinase kinase kinase 3
Hyou1	3.60049	3.79624	0.000140987	17.671	17.951	17.2564	21.1989	20.8303	21.6506	No	Yes	26.7282	0	204.44	129	28	20	24	18	26	27	26	Q9JKR6;F6TRP3;A0A1L1SQ34;E0CYZ2	Q9JKR6	Hypoxia up-regulated protein 1
Eif4g3	3.60004	2.64575	0.000150979	11.9174	11.8819	11.3058	16.184	14.1733	15.5479	No	Yes	21.1123	0	9.0793	5	3	2	2	2	3	2	3	Z4YKC4;A0A0R4J112;A2AMI2;A0A0N4SVL0;Q80XI3;A2AMI7;A2AMI6	Z4YKC4;A0A0R4J112;A2AMI2;A0A0N4SVL0;Q80XI3;A2AMI7	Eukaryotic translation initiation factor 4 gamma 3
Parg	3.59984	1.89263	0.000560187	7.84947	8.07003	8.42637	13.3123	9.80622	12.0269	Yes	Yes	20.8576	0.00056561	1.9922	1	1	0	1	0	1	1	1	E9Q954;A0A2I3BRU5;G3X8U8;O88622	E9Q954;A0A2I3BRU5;G3X8U8;O88622	Poly(ADP-ribose) glycohydrolase
Arhgap25	3.59955	3.94913	0.000154015	15.646	15.9885	15.3432	19.2465	18.8926	19.6372	No	Yes	25.7357	0	66.04	60	20	11	14	11	16	20	19	Q8BYW1	Q8BYW1	Rho GTPase-activating protein 25
Gimap1	3.59884	2.6138	0.000147526	13.9075	13.9686	12.7526	17.6776	16.141	17.6066	No	Yes	24.9402	0	14.025	20	7	4	7	4	7	6	7	Q3TFI6;P70224	Q3TFI6;P70224	GTPase IMAP family member 1
Shmt2	3.59857	4.19838	0.000184211	17.0497	17.0156	16.6725	20.5153	20.1379	20.8802	No	Yes	27.4392	0	86.863	93	23	17	17	15	21	23	23	Q9CZN7	Q9CZN7	Serine hydroxymethyltransferase
Kiaa1598	3.59658	3.27114	0.000101449	13.6867	13.7069	12.6642	16.72	16.6794	17.4481	No	Yes	23.779	0	10.625	15	7	4	4	3	6	6	7	Q8K2Q9	Q8K2Q9	Shootin-1
Lman1	3.59654	4.11728	0.000174346	15.7374	15.8995	15.1381	19.1055	19.0476	19.4115	No	Yes	26.5241	0	18.894	17	8	7	6	3	8	7	7	Q9D0F3	Q9D0F3	Protein ERGIC-53
Cycs	3.59627	3.91479	0.000151188	17.197	17.3866	16.5296	20.5505	20.4645	20.8869	No	Yes	29.6006	0	48.252	37	7	3	4	3	7	7	7	P62897;CON__P62894;P00015	P62897	Cytochrome c, somatic
Pdcd6	3.59586	3.56087	0.000122807	14.1546	14.3192	13.5159	17.34	17.3241	18.1132	No	Yes	25.2147	0	10.092	19	5	3	3	1	4	5	5	P12815	P12815	Programmed cell death protein 6
Cnbp	3.59533	3.07602	8.76644e-05	14.1615	13.7787	13.0965	16.6315	17.3025	17.8888	No	Yes	24.3266	0	20.118	19	5	5	5	4	4	4	4	A0A0N4SVS6;P53996	A0A0N4SVS6;P53996	Cellular nucleic acid-binding protein
Hip1	3.59497	3.49611	0.000117548	14.116	14.2906	13.6074	17.2111	17.3757	18.2121	No	Yes	23.3907	0	62.339	20	12	7	9	5	11	11	11	Q8VD75;A0A0J9YUA3;A0A0J9YV08;A0A1D5RMM7	Q8VD75;A0A0J9YUA3	Huntingtin-interacting protein 1
Nupl1	3.59486	3.28322	0.00010219	11.2623	11.6384	11.7073	15.5706	14.3349	15.487	No	Yes	23.6832	0	13.189	11	4	2	3	2	4	4	3	Q8R332	Q8R332	Nucleoporin p58/p45
Lta4h	3.59485	3.89263	0.000149095	17.3593	17.4515	16.7999	21.1246	20.4013	20.8693	No	Yes	27.3116	0	67.762	83	18	14	14	12	17	17	16	P24527	P24527	Leukotriene A-4 hydrolase
Phax	3.59394	3.20772	9.12052e-05	8.73826	9.00931	NaN	12.0601	12.5374	12.8057	No	Yes	20.3885	0.0008401	1.9334	1	1	1	1	0	1	1	1	G5E8V8;Q9JJT9	G5E8V8;Q9JJT9	Phosphorylated adapter RNA export protein
Mrps27	3.59392	2.72013	0.000156746	13.0256	11.3687	11.1741	15.2499	15.5539	15.5463	No	Yes	23.1655	0	4.7785	5	2	2	1	1	1	2	1	Q8BK72	Q8BK72	28S ribosomal protein S27, mitochondrial
Ctage5;Mia2	3.59373	2.94457	8.07382e-05	12.7812	12.5301	12.0938	16.3009	15.1413	16.7441	No	Yes	22.4706	0	15.665	12	6	3	4	3	5	4	5	H3BJ71;H3BKL6;H3BL19;H3BJI6;H3BK44;E9PY90;H3BK48;E9Q3S2;H3BKH2;H3BJS0;A0A1W2P711;Q91ZV0;H3BJS5;H3BJ35;H3BJY7	H3BJ71;H3BKL6;H3BL19;H3BJI6;H3BK44;E9PY90;H3BK48;E9Q3S2;H3BKH2;H3BJS0;A0A1W2P711;Q91ZV0	Melanoma inhibitory activity protein 2
Ndufa12	3.59337	3.87693	0.000147992	14.4409	15.1591	14.8515	18.3954	18.0526	18.7835	No	Yes	27.1969	0	8.9821	22	5	4	5	4	5	5	5	F6RBR6;A0A0R4J275;Q7TMF3	F6RBR6;A0A0R4J275;Q7TMF3	NADH dehydrogenase [ubiquinone] 1 alpha subcomplex subunit 12
Ubr4	3.59105	3.53064	0.000120172	11.8611	12.1468	11.658	14.9884	15.3314	16.1192	No	Yes	19.7961	0	5.5217	5	5	2	2	2	4	4	4	A2AN08;F6SSP6;Z4YMA7	A2AN08;F6SSP6	E3 ubiquitin-protein ligase UBR4
Nup210	3.58964	4.80587	0.000258303	15.0857	14.8392	14.8185	18.7474	18.2327	18.5322	No	Yes	23.819	0	101.56	48	19	11	9	10	19	18	17	Q9QY81;A0A0R4J1I6;F6XGN0	Q9QY81;A0A0R4J1I6;F6XGN0	Nuclear pore membrane glycoprotein 210
Man2b2	3.58962	4.23329	0.000185923	15.2269	15.2148	14.8148	18.482	18.4713	19.072	No	Yes	24.0618	0	45	26	7	4	6	4	7	6	6	O54782;F6TMZ3;F6Z025	O54782;F6TMZ3	Epididymis-specific alpha-mannosidase
Gmpr2	3.58962	4.21562	0.000183727	12.6261	12.9199	12.2138	16.2003	15.9393	16.3889	No	Yes	23.7582	0	7.839	10	4	2	3	2	4	3	3	Q99L27;A0A2I3BQX8;Q9DCZ1	Q99L27	GMP reductase 2
Top1	3.58724	4.07716	0.000167264	16.1264	16.6524	15.7939	19.7298	19.6663	19.9383	No	Yes	26.0749	0	54.872	79	22	11	15	10	21	20	20	Q04750;Q8R4U6	Q04750	DNA topoisomerase 1
Gstm1	3.58664	3.6119	0.000124888	16.3265	16.6156	15.7364	20.1036	19.3594	19.9754	No	Yes	27.6176	0	33.069	32	10	5	8	6	9	10	10	P10649;A2AE89;F6WHQ7;D3YVP6;D3YX76;Q80W21;D3YVP5;P15626;E9QAC8;Q8R5I6;A2AE91;D3YZ29;P19639;E9PV63;E9PVM7;D3YVP9;O35660;D3YVP8;G5E8M7;P48774	P10649;A2AE89;F6WHQ7	Glutathione S-transferase Mu 1
Cbfb	3.58587	4.50217	0.000216383	13.0925	13.232	12.9795	16.733	16.3346	16.9941	No	Yes	25.0375	0	27.057	8	3	2	2	1	3	3	3	Q08024	Q08024	Core-binding factor subunit beta
Gimap4	3.58572	3.61894	0.000125336	16.6068	16.9737	16.2183	20.2831	19.6824	20.5904	No	Yes	27.6209	0	123.64	64	17	8	11	7	15	16	16	Q99JY3;D3YWB5;D6RGS2;D3Z7Q4;D3Z3F3	Q99JY3;D3YWB5	GTPase IMAP family member 4
Pigk	3.58552	2.19332	0.000405926	10.0215	10.6328	8.02343	13.5833	12.6163	13.2347	Yes	Yes	20.5583	0	5.2147	5	2	0	1	0	2	2	2	E9Q421;Q8BXX3;Q8BL63;Q9CXY9	E9Q421;Q8BXX3;Q8BL63;Q9CXY9	GPI-anchor transamidase
Glrx2	3.58455	3.24473	9.85915e-05	9.06855	8.91725	8.11709	12.2207	11.7777	12.8582	Yes	Yes	21.232	0.00056481	1.989	1	1	0	1	0	1	1	1	B7ZC40;Q923X4	B7ZC40;Q923X4	Glutaredoxin-2, mitochondrial
Drg1	3.58264	4.45104	0.000209268	13.1622	12.7899	12.8529	16.2859	16.4015	16.8655	No	Yes	23.9757	0	13.556	15	6	3	3	3	6	6	5	P32233	P32233	Developmentally-regulated GTP-binding protein 1
Ptbp1	3.58243	3.97904	0.000154355	17.6983	18.0892	17.29	21.2145	21.0408	21.5695	No	Yes	28.6135	0	250.55	108	18	14	15	12	16	16	17	Q8BGJ5;Q922I7;Q8CB58;P17225;E9QMW9;F7DCW4;F7AXP1;E9Q0W3;E9Q279;A0A1W2P7W3;B2RU80	Q8BGJ5;Q922I7;Q8CB58;P17225;E9QMW9	Polypyrimidine tract-binding protein 1
Ddx20	3.5819	2.66688	0.000151631	10.0465	8.59998	8.52971	12.236	12.3178	13.3681	Yes	Yes	19.3975	0	8.0996	2	1	0	0	0	1	1	1	Q9JJY4	Q9JJY4	Probable ATP-dependent RNA helicase DDX20
Cwf19l1	3.58166	3.87152	0.000145078	8.86743	9.17246	8.9493	12.1551	12.4664	13.1126	Yes	Yes	20.1866	0.0047431	1.396	1	2	0	0	0	1	1	1	Q8CI33;A0A494B9Q5	Q8CI33;A0A494B9Q5	CWF19-like protein 1
Fah	3.58145	2.85516	0.000140011	8.91585	9.47245	8.05243	12.1028	11.9772	13.105	Yes	Yes	20.0044	0.00029095	2.2208	2	1	0	0	0	1	1	1	P35505	P35505	Fumarylacetoacetase
Tmem173	3.58125	1.92691	0.000510924	11.8376	14.1107	11.9	16.9298	14.8495	16.8127	No	Yes	23.8195	0	28.067	10	3	1	3	1	3	1	2	Q3TBT3;A0A494BBL9	Q3TBT3;A0A494BBL9	Stimulator of interferon genes protein
Sec61g	3.58082	4.8325	0.00025878	13.1485	13.015	12.848	16.718	16.2948	16.7411	No	Yes	27.1149	0	7.4644	8	2	2	2	1	1	1	1	P60060;G3UWH0	P60060;G3UWH0	Protein transport protein Sec61 subunit gamma
Dpp9	3.58039	1.97631	0.000457931	NaN	12.2623	10.2918	15.0377	14.3546	15.1801	No	Yes	21.4742	0	4.0322	1	1	0	1	1	1	1	1	Q8BVG4	Q8BVG4	Dipeptidyl peptidase 9
Slc25a24	3.58026	4.64022	0.000234114	14.1912	14.4219	14.6202	18.2157	17.7263	18.0321	No	Yes	24.7509	0	82.568	45	14	5	10	7	12	12	11	Q8BMD8;A0A0G2JFB9	Q8BMD8	Calcium-binding mitochondrial carrier protein SCaMC-1
Aimp1	3.58013	4.04922	0.000162413	14.49	14.6575	13.8962	18.0079	17.6672	18.1091	No	Yes	24.6962	0	18.984	16	9	4	4	3	7	7	5	P31230;Q3UZG4;A0A0G2JDH0;A0A0G2JEU9;A0A0G2JDW6	P31230;Q3UZG4	Aminoacyl tRNA synthase complex-interacting multifunctional protein 1;Endothelial monocyte-activating polypeptide 2
Lgals1	3.58005	4.53268	0.000219092	17.4496	17.3618	17.0833	20.7281	20.6926	21.2142	No	Yes	28.9783	0	72.7	29	6	6	6	5	6	6	6	P16045;A0A2R8VHJ0	P16045	Galectin-1
Inf2	3.57947	3.53483	0.000119149	12.1159	12.6849	12.3425	15.7818	15.5152	16.5847	No	Yes	21.5588	0	29.987	9	5	3	4	4	5	5	5	Q0GNC1;E9QLA5;A0A1Y7VM80	Q0GNC1;E9QLA5;A0A1Y7VM80	Inverted formin-2
Gga2	3.57915	1.92387	0.000473934	10.0289	8.9541	NaN	13.5049	11.9344	13.7727	No	Yes	18.7748	0	15.139	2	2	1	1	0	2	1	2	Q6P5E6	Q6P5E6	ADP-ribosylation factor-binding protein GGA2
Nt5c3a	3.57913	4.41391	0.000202605	12.3231	12.6214	12.3148	15.708	15.931	16.3576	No	Yes	22.2276	0	12.467	9	4	2	3	2	4	4	3	Q9D020	Q9D020	Cytosolic 5-nucleotidase 3A
S100a11	3.57887	3.41465	0.000110672	17.3126	17.2667	16.8651	21.4233	20.2113	20.5465	No	Yes	30.1032	0	25.98	50	5	4	4	4	5	4	5	P50543	P50543	Protein S100-A11
Scly	3.57794	4.62333	0.000231405	12.4225	12.6029	12.5616	16.0305	15.8355	16.4549	No	Yes	22.4425	0	6.7805	13	4	2	2	2	4	4	4	A0A0R4J069;Q9JLI6;F7D651;F6ZFP8;D3Z7G6	A0A0R4J069;Q9JLI6;F7D651;F6ZFP8	Selenocysteine lyase
Aldoa;Aldoart1	3.57636	4.18825	0.00017744	19.8511	19.8981	19.3432	23.2384	22.9991	23.5841	No	Yes	30.177	0	218.33	160	27	21	25	18	26	25	26	P05064;A6ZI44;D3YWI1;D3Z510;A0A0U1RPN8;Q9CPQ9;A6ZI46;D3YV98;A0A0U1RPT5;A6ZI47;P05063;Q91Y97	P05064;A6ZI44;D3YWI1;D3Z510;A0A0U1RPN8;Q9CPQ9;A6ZI46	Fructose-bisphosphate aldolase A;Fructose-bisphosphate aldolase
Psmc6	3.57377	3.87504	0.00014433	15.1961	15.3469	14.8115	18.9115	18.1963	18.9679	No	Yes	26.0107	0	108.38	41	14	6	9	7	14	11	12	P62334	P62334	26S protease regulatory subunit 10B
Coro7	3.57352	3.80662	0.00013834	15.4155	15.6911	15.0173	19.1813	18.4743	19.1888	No	Yes	25.493	0	70.122	46	17	9	13	8	16	14	15	Q9D2V7;G3X9L5;E9PYU1	Q9D2V7	Coronin-7
Ctsh	3.57238	3.25638	9.83146e-05	17.0072	17.6223	16.4768	20.3359	20.3426	21.1449	No	Yes	28.1859	0	63.957	38	5	5	5	4	5	5	5	P49935;A0A087WR20;D3Z437	P49935;A0A087WR20	Pro-cathepsin H;Cathepsin H mini chain;Cathepsin H;Cathepsin H heavy chain;Cathepsin H light chain
Trip12	3.5723	3.8871	0.000145379	13.1556	13.2183	12.6892	17.0119	16.1782	16.5899	No	Yes	21.8609	0	22.825	15	8	5	7	5	7	7	6	A0A087WNZ7;G5E870;A0A087WRV6;A0A0B4J1N9;A0A087WQ02;A0A087WP92;A0A087WS65;Q3TP48	A0A087WNZ7;G5E870;A0A087WRV6;A0A0B4J1N9	E3 ubiquitin-protein ligase TRIP12
Fam63a	3.57223	2.24497	0.000334728	10.8819	10.3597	9.38765	13.3779	NaN	14.1861	No	Yes	20.756	0.0011148	1.8777	0	2	1	1	1	1	0	1	Q76LS9	Q76LS9	Protein FAM63A
Afg3l2	3.57205	3.66987	0.000127505	15.3041	14.8031	14.7351	18.7357	17.9631	18.8596	No	Yes	24.6196	0	38.902	45	16	9	10	9	14	13	14	Q8JZQ2;Q920A7	Q8JZQ2	AFG3-like protein 2
Hm13;H13	3.57163	4.29246	0.000187919	14.7425	15.0389	15.0586	18.7359	18.1044	18.7147	No	Yes	26.6147	0	7.4895	20	4	3	3	3	4	4	4	Q9D8V0;A3KGR9;Q6PGJ8	Q9D8V0;A3KGR9	Minor histocompatibility antigen H13
Hgs	3.57062	3.95392	0.000150538	11.216	11.7169	11.2407	14.8534	14.6298	15.4023	No	Yes	21.2943	0	8.889	8	3	2	2	2	3	3	3	Q99LI8;Q3UMA3;B1ATY9	Q99LI8;Q3UMA3;B1ATY9	Hepatocyte growth factor-regulated tyrosine kinase substrate
Tmpo	3.57051	2.47628	0.000204565	10.9973	13.0345	12.1456	16.3243	15.453	15.1116	No	Yes	22.3876	0	12.534	10	7	1	4	2	7	5	4	Q61033	Q61033	Lamina-associated polypeptide 2, isoforms alpha/zeta
Mia3	3.56962	2.73744	0.000156591	13.1421	13.5937	11.8522	16.396	15.9915	16.9094	No	Yes	20.7393	0	18.314	16	11	5	7	3	9	9	8	Q8BI84;A0A0R4J2D3;A0A0A6YX61	Q8BI84;A0A0R4J2D3	Melanoma inhibitory activity protein 3
Ppp6c	3.56825	3.21899	9.53029e-05	12.9522	11.9101	11.8546	15.5809	15.5356	16.3051	No	Yes	21.4979	0	4.2961	5	2	2	1	1	2	2	2	Q9CQR6;A0A0N4SVL9;A0A0N4SVE2	Q9CQR6;A0A0N4SVL9;A0A0N4SVE2	Serine/threonine-protein phosphatase 6 catalytic subunit;Serine/threonine-protein phosphatase 6 catalytic subunit, N-terminally processed
Dpm3	3.56797	3.74057	0.000133588	12.1254	12.8593	12.1975	15.8555	15.6506	16.38	No	Yes	24.8641	0	3.9202	7	2	1	2	2	2	2	2	Q9D1Q4	Q9D1Q4	Dolichol-phosphate mannosyltransferase subunit 3
Cwc15	3.56765	1.64968	0.000869185	12.9594	10.545	12.5318	17.2626	13.841	15.6355	No	Yes	24.9865	0	21.207	9	4	2	1	1	4	1	2	Q9JHS9;A0A1L1SVD8	Q9JHS9;A0A1L1SVD8	Spliceosome-associated protein CWC15 homolog
Tom1	3.56536	3.83187	0.000138889	12.4402	12.758	11.863	16.21	15.7082	15.8391	No	Yes	22.7321	0	21.111	10	4	2	3	2	4	4	3	Q3UDC3;O88746;A0A1D5RM45;A0A1D5RL90;A0A1D5RM84	Q3UDC3;O88746;A0A1D5RM45	Target of Myb protein 1
Atp6v1e1	3.56526	3.71624	0.000130475	16.73	16.5002	15.9081	19.6123	19.8853	20.3365	No	Yes	28.2157	0	27.045	33	9	6	7	6	7	8	8	P50518;A0A0N4SW34;A0A0N4SW07;A0A0N4SWA3;Q9D593	P50518	V-type proton ATPase subunit E 1
	3.56423	3.16476	9.12647e-05	8.555	8.45502	8.45634	11.8715	11.3835	12.904	No	Yes	20.1823	0	7.6303	1	1	1	1	1	1	1	1	Q8BR90	Q8BR90	UPF0600 protein C5orf51 homolog
Pgk1	3.56321	4.23	0.000179257	18.6429	18.6345	18.15	22.0629	21.725	22.3291	No	Yes	28.341	0	186.77	122	21	16	19	15	18	18	18	P09411;S4R2M7;P09041	P09411;S4R2M7	Phosphoglycerate kinase 1;Phosphoglycerate kinase
Gga1	3.5622	2.85402	0.000168443	12.7837	11.0588	12.4441	15.6429	15.4403	15.89	No	Yes	23.0135	0	14.995	14	4	2	1	2	3	4	4	Q8R0H9;A0A2R8VI72	Q8R0H9;A0A2R8VI72	ADP-ribosylation factor-binding protein GGA1
Snrpd3	3.5621	2.54595	0.000212841	16.6415	16.6016	14.655	19.4211	19.4978	19.6655	No	Yes	28.8269	0	42.704	29	4	3	4	3	4	4	4	P62320;A0A1W2P7K5	P62320;A0A1W2P7K5	Small nuclear ribonucleoprotein Sm D3
Ddx58	3.55924	3.29856	0.000100143	13.7019	13.5574	13.2531	16.5546	17.835	16.8006	No	Yes	23.7905	0	12.694	12	9	5	4	4	6	7	7	Q6Q899;A2AP29	Q6Q899;A2AP29	Probable ATP-dependent RNA helicase DDX58
Sipa1	3.55844	2.51785	0.000208441	12.98	12.6646	12.6419	17.346	15.0827	16.533	No	Yes	22.8266	0	10.266	14	9	3	3	3	6	4	6	E9Q0Y4;Q3V403;P46062	E9Q0Y4;Q3V403;P46062	Signal-induced proliferation-associated protein 1
Ankrd13a	3.55711	3.35136	0.000104167	11.6882	12.2631	11.5989	15.8443	14.7317	15.6454	No	Yes	22.646	0	16.881	8	5	2	2	2	4	3	4	Q80UP5;F7B209	Q80UP5;F7B209	Ankyrin repeat domain-containing protein 13A
Inpp4a	3.55677	3.61877	0.000123239	10.3043	9.66234	9.51407	13.3593	12.9795	13.8123	No	Yes	22.0621	0	3.6878	3	1	1	1	1	1	1	1	A0A0A6YXS5;F6R4N2;A0A0R4J0Q2;E9QAD0;Q3UEQ1;E9Q9A0;F6V2U0;D3YUD3;D3YUL8;D3Z230	A0A0A6YXS5;F6R4N2;A0A0R4J0Q2;E9QAD0;Q3UEQ1;E9Q9A0;F6V2U0;D3YUD3;D3YUL8;D3Z230
Add1	3.55642	3.30739	0.000100719	13.4593	13.7758	13.2718	17.7305	16.3995	17.0462	No	Yes	23.9391	0	26.307	16	10	5	6	5	9	7	6	F8WHZ9;F8WGR0;Q9QYC0;E9Q1K3;F6RDR0;A0A0J9YVI4;F6V4G5;D3Z0T1;Q9QYB8	F8WHZ9;F8WGR0;Q9QYC0;E9Q1K3;F6RDR0;A0A0J9YVI4	Alpha-adducin
Rab3gap2	3.55619	3.03787	8.1728e-05	NaN	10.7424	10.8734	14.3396	13.9282	14.8245	No	Yes	20.553	0	2.5202	1	1	0	1	1	1	1	1	E9QKE4;A0A0A6YWM5;Q8BMG7	E9QKE4;A0A0A6YWM5;Q8BMG7	Rab3 GTPase-activating protein non-catalytic subunit
Ppt2	3.55575	2.74377	0.000155895	12.5458	13.4928	11.5752	15.8475	15.9988	16.4348	No	Yes	25.0064	0	4.9047	7	2	2	2	2	2	2	2	E9Q0T0;G5E8W7;F6SPQ1;O35448;E9PVM9	E9Q0T0;G5E8W7;F6SPQ1;O35448;E9PVM9	Lysosomal thioesterase PPT2
Top2a	3.555	4.16736	0.00017094	14.8478	14.9552	14.4934	18.0468	18.7198	18.1949	No	Yes	23.8055	0	75.552	38	20	9	10	8	16	20	17	Q01320	Q01320	DNA topoisomerase 2-alpha
Tmem214	3.55405	3.89887	0.00014359	11.4022	12.1494	11.7222	15.1747	15.0699	15.6914	No	Yes	22.3695	0	2.595	3	2	1	1	2	1	2	2	D3Z6S1;Q8BM55	D3Z6S1;Q8BM55	Transmembrane protein 214
Ppp2r1a	3.55393	3.57407	0.000119556	16.5985	17.0913	16.569	20.4768	19.711	20.7329	No	Yes	26.753	0	126.57	87	19	12	15	13	17	17	17	Q76MZ3;G3UWL2;G3UXQ1;H3BJ83;H3BK50	Q76MZ3	Serine/threonine-protein phosphatase 2A 65 kDa regulatory subunit A alpha isoform
Rpl35a	3.55136	2.34131	0.000295238	NaN	14.7125	13.3379	17.5969	17.1788	17.9539	No	Yes	26.7727	0	2.8766	5	2	0	2	2	2	2	2	O55142	O55142	60S ribosomal protein L35a
Ssbp1	3.55071	3.87519	0.000141129	15.1741	14.8735	14.6126	18.6573	17.9499	18.7051	No	Yes	27.3478	0	56.93	21	6	4	4	3	5	6	5	Q8R2K3;Q9CYR0;D3Z3Y3	Q8R2K3;Q9CYR0	Single-stranded DNA-binding protein;Single-stranded DNA-binding protein, mitochondrial
Cdc73	3.54904	3.92456	0.000144778	11.6112	12.174	11.7177	15.824	15.0734	15.2526	No	Yes	22.4124	0	5.2544	13	5	3	4	3	5	4	3	Q8JZM7	Q8JZM7	Parafibromin
Rpl15	3.54776	1.68845	0.000817123	13.8665	14.4589	12.9839	17.0271	19.3745	15.5509	No	Yes	26.9835	0	6.4755	11	4	3	3	3	3	2	2	Q9CZM2;B8JKK2	Q9CZM2;B8JKK2	60S ribosomal protein L15;Ribosomal protein L15
Iqsec1	3.54672	1.86265	0.000641781	11.0464	9.80594	9.62012	11.848	14.3299	14.9348	Yes	Yes	21.0489	0	8.3577	2	2	0	1	0	1	2	2	A0A5F8MPT9;A0A1D5RM83;E9PUA3;Q8R0S2	A0A5F8MPT9;A0A1D5RM83;E9PUA3;Q8R0S2	IQ motif and SEC7 domain-containing protein 1
Cops7a	3.54624	2.84091	0.000165618	10.7907	12.3182	11.067	15.2031	14.3851	15.2264	No	Yes	23.7426	0	11.361	6	2	1	2	2	2	2	2	D3YVI6;D3Z440;Q9CZ04;D3Z0S0	D3YVI6;D3Z440;Q9CZ04;D3Z0S0	COP9 signalosome complex subunit 7a
Cyth4	3.54521	3.8815	0.000140704	12.9283	13.2274	12.8146	16.4748	16.1107	17.0205	No	Yes	24.1256	0	30.254	14	5	4	4	4	4	4	5	Q80YW0;A0A2R8VI37;A0A2R8VKE8	Q80YW0	Cytohesin-4
Timm10	3.54465	3.39584	9.82456e-05	13.053	13.3039	NaN	17.034	16.3986	16.7368	No	Yes	25.4955	0	3.6468	7	3	2	2	1	2	2	2	P62073	P62073	Mitochondrial import inner membrane translocase subunit Tim10
Fkbp15	3.54339	3.50342	0.000113452	13.505	13.7318	12.7183	17.0477	16.4689	17.0686	No	Yes	22.9026	0	38.925	20	9	3	5	4	8	9	9	A0A6I8MWZ0;Q6P9Q6;Q80YW9;Q80YW6;Q80YW7	A0A6I8MWZ0;Q6P9Q6;Q80YW9	FK506-binding protein 15;Peptidyl-prolyl cis-trans isomerase
Chd4	3.54298	4.64462	0.000222222	15.0515	15.145	14.9552	18.4659	18.3689	18.9459	No	Yes	24.03	0	53.161	63	22	9	14	8	19	20	19	E9QAS4;E9QAS5;Q6PDQ2;E9PYU4;E9PYL1;A2A8L1;F6WR45;F7C528;E9Q614;B1AR17;A0A5F8MQ82;F6V4V3	E9QAS4;E9QAS5;Q6PDQ2	Chromodomain-helicase-DNA-binding protein 4
Dhrs7	3.54233	3.31578	0.000100071	14.1895	14.2715	14.3485	18.4924	17.0907	17.8534	No	Yes	25.5048	0	19.751	26	6	3	5	5	6	6	6	A0A1Y7VN19;Q9CXR1	A0A1Y7VN19;Q9CXR1	Dehydrogenase/reductase SDR family member 7
Gpr97	3.54231	3.12001	8.71731e-05	9.57885	9.59973	9.28798	13.8103	12.2592	13.024	No	Yes	21.8636	0	6.4898	3	1	1	1	1	1	1	1	A0A1D5RLS0;Q8R0T6	A0A1D5RLS0;Q8R0T6	Probable G-protein coupled receptor 97
Apaf1	3.54154	2.64335	0.000146364	9.68274	8.61898	10.4475	13.6212	12.5427	13.2099	Yes	Yes	21.1797	0.0057366	1.3004	0	1	0	0	0	1	1	1	Q80VR5;G3XA09;O88879	Q80VR5;G3XA09;O88879	Apoptotic protease-activating factor 1
Clip1	3.54105	3.11708	8.69565e-05	13.1761	12.5877	12.8435	17.1008	15.6302	16.4995	No	Yes	21.7806	0	25.624	12	9	5	4	6	7	5	6	D3Z2Z1;F8WIA1;Q922J3;Q8C0S5;D3Z3M7;F6RCU2;F7CB97;Q9Z0H8	D3Z2Z1;F8WIA1;Q922J3;Q8C0S5;D3Z3M7;F6RCU2	CAP-Gly domain-containing linker protein 1
Atic	3.5409	4.14826	0.000166074	16.4283	16.5864	16.4848	20.015	19.6303	20.4769	No	Yes	26.8076	0	151.23	73	20	12	17	14	19	20	20	Q9CWJ9	Q9CWJ9	Bifunctional purine biosynthesis protein PURH;Phosphoribosylaminoimidazolecarboxamide formyltransferase;IMP cyclohydrolase
Gcc1	3.5403	4.04279	9.19012e-05	NaN	9.63476	9.55418	13.1602	13.1093	NaN	No	Yes	21.4159	0.00029087	2.2206	1	1	0	1	1	1	1	0	F6VDD7;Q9D4H2	F6VDD7;Q9D4H2	GRIP and coiled-coil domain-containing protein 1
Acox3	3.53913	2.32248	0.00031751	12.2539	10.8155	10.8028	14.3738	14.1245	15.9913	No	Yes	21.8772	0	18.683	9	5	2	1	1	3	3	5	Q3TAW3;E9Q296;Q8C178;Q9EPL9;D3Z2N6;A0A0J9YVH1	Q3TAW3;E9Q296;Q8C178;Q9EPL9	Acyl-coenzyme A oxidase;Peroxisomal acyl-coenzyme A oxidase 3
Exosc2	3.53722	2.45323	0.000222589	9.75453	11.0393	8.65455	13.2678	13.2542	13.538	Yes	Yes	21.8429	0	5.1646	2	1	0	0	0	1	1	1	A2AV19;Q8VBV3	A2AV19;Q8VBV3	Exosome complex component RRP4
Endog	3.53683	2.60619	0.000162308	10.119	10.4111	10.4204	14.07	12.6839	14.807	No	Yes	22.0306	0	7.6282	5	2	1	2	2	2	1	2	O08600	O08600	Endonuclease G, mitochondrial
	3.5366	4.87033	0.000247788	10.7078	10.539	10.2881	13.9192	13.9611	14.2644	No	Yes	22.6072	0.00028727	2.131	2	2	1	1	1	1	2	1	Q9CXL3;A0A0G2JEY4	Q9CXL3;A0A0G2JEY4	Uncharacterized protein C7orf50 homolog
Champ1	3.53614	3.27312	9.67519e-05	9.27857	8.91049	7.93238	12.0522	12.4476	12.2301	No	Yes	18.595	0.003231	1.5902	3	1	1	1	1	1	1	1	Q8K327	Q8K327	Chromosome alignment-maintaining phosphoprotein 1
H1f0	3.53465	3.78724	0.000133333	19.219	19.2914	18.5369	22.7944	22.1726	22.6843	No	Yes	32.3355	0	16.699	51	6	6	6	6	6	6	6	P10922	P10922	Histone H1.0;Histone H1.0, N-terminally processed
Arl2	3.53416	3.30757	9.908e-05	10.0936	8.89919	9.47168	13.1935	12.5866	13.287	Yes	Yes	21.9053	0.0011142	1.8718	2	1	0	0	0	1	1	1	Q9D0J4	Q9D0J4	ADP-ribosylation factor-like protein 2
Nras	3.5334	3.14172	8.80503e-05	13.7871	14.3491	12.9936	17.1881	16.8884	17.6535	No	Yes	26.0156	0	13.563	16	5	3	5	2	5	5	5	A0A0G2JGP4;Q9D091;P08556;A0A0G2JE25;A0A0G2JGM2;B2KGV5;E9Q8V2;E9PVD5;A0A0N4SVY1	A0A0G2JGP4;Q9D091;P08556;A0A0G2JE25	GTPase NRas
Rasa4	3.53151	2.34617	0.000320251	10.1462	9.40418	8.27256	13.0579	11.8284	13.5311	No	Yes	19.3088	0	3.3884	5	2	1	1	1	2	2	2	Q6PFQ7;F6WTE9	Q6PFQ7;F6WTE9	Ras GTPase-activating protein 4
Psmd8	3.531	2.75765	0.000155206	14.0545	13.6098	12.7374	17.8047	16.3843	16.8057	No	Yes	24.7839	0	4.8687	7	4	3	2	3	4	2	1	Q9CX56;Q9CPS5;Q3TG45	Q9CX56;Q9CPS5;Q3TG45	26S proteasome non-ATPase regulatory subunit 8
Armc1	3.5289	2.23566	0.000409567	9.64341	8.34087	7.45228	11.3133	11.7659	12.9441	Yes	Yes	20.7814	0.003489	1.5584	2	1	0	0	0	1	1	1	Q9D7A8	Q9D7A8	Armadillo repeat-containing protein 1
Cdk5rap3	3.52633	3.23397	9.29615e-05	12.2692	12.4651	11.4449	15.4185	15.1888	16.1509	No	Yes	22.9957	0	4.6132	5	3	2	3	1	3	3	3	Q99LM2;A2A6D9;B0QZI8;A2A6E1	Q99LM2;A2A6D9;B0QZI8	CDK5 regulatory subunit-associated protein 3
Ccdc50	3.52586	2.56636	0.000212281	13.0809	11.445	13.1665	16.5729	15.4884	16.2087	No	Yes	24.2862	0	4.5233	4	3	2	1	3	3	3	3	F6UK66;A0A668KL36;Q810U5	F6UK66;A0A668KL36;Q810U5	Coiled-coil domain-containing protein 50
Aco1	3.5251	3.42646	0.000106545	13.9616	14.4312	13.3506	17.2342	17.2145	17.87	No	Yes	23.527	0	71.155	34	13	4	7	5	11	12	12	P28271	P28271	Cytoplasmic aconitate hydratase
Adar	3.52492	3.53663	0.000113729	9.96083	9.49153	8.84104	12.8997	12.7378	13.2306	No	Yes	19.0259	0	5.352	3	2	1	1	1	2	2	2	Q99MU3	Q99MU3	Double-stranded RNA-specific adenosine deaminase
Man2c1	3.52474	2.85885	0.000165532	9.45402	8.48146	9.98467	13.0565	12.2262	13.2117	Yes	Yes	19.6093	0	4.5007	1	1	0	0	0	1	1	1	E9PYM7;E9PZ88;F8WIE1;Q91W89	E9PYM7;E9PZ88;F8WIE1;Q91W89	Alpha-mannosidase;Alpha-mannosidase 2C1
Serpinb6a;Serpinb6	3.52453	3.61681	0.000119863	17.1967	17.5106	16.7453	20.4954	20.3501	21.1807	No	Yes	28.0485	0	126.52	87	17	14	15	13	15	15	14	F8WIV2;Q60854;K7E6F1;E9Q108;E9Q0P9;E9Q3Y1;E9Q6X2;E9PYY0;E9PZQ9;E9Q4R2;Q3UWK8	F8WIV2;Q60854;K7E6F1	Serpin B6
Rpl8	3.52448	4.112	0.000157303	17.7489	17.5869	17.172	20.8457	20.8364	21.3991	No	Yes	29.5205	0	87.719	43	8	7	8	6	8	8	8	P62918	P62918	60S ribosomal protein L8
Aldh18a1	3.52421	4.01197	0.000148936	15.3507	15.7357	15.113	18.8562	18.6201	19.2957	No	Yes	24.9608	0	65.975	71	19	13	11	10	16	18	19	Q9Z110;D3Z0B4;H3BKJ8;H3BLE8	Q9Z110	Delta-1-pyrroline-5-carboxylate synthase;Glutamate 5-kinase;Gamma-glutamyl phosphate reductase
Brd2	3.52265	4.46237	0.000194444	13.1728	13.0249	12.6496	16.2022	16.5859	16.6271	No	Yes	22.5719	0	6.4087	8	4	3	3	3	4	4	4	Q7JJ13;I7HPW1;G3UZR9	Q7JJ13	Bromodomain-containing protein 2
Pabpn1;Gm20521	3.52227	3.77267	0.00012975	13.2419	13.4695	12.8014	16.5481	16.3719	17.1597	No	Yes	25.0069	0	16.508	13	4	2	2	2	4	4	4	G3UY42;Q8CCS6;D3YUB9;D3Z055;G3UWS5;D3Z5F7;G3UX74	G3UY42;Q8CCS6;D3YUB9;D3Z055;G3UWS5;D3Z5F7	Polyadenylate-binding protein 2
Bysl	3.52225	3.15062	8.78294e-05	11.5778	10.3299	10.9229	13.9412	14.6508	14.8054	No	Yes	22.1063	0	2.5202	6	3	2	1	2	2	3	2	O54825	O54825	Bystin
Srp68	3.52219	3.32431	9.93612e-05	14.4303	14.2265	13.8728	17.6532	17.0835	18.3595	No	Yes	24.3693	0	21.126	24	11	7	6	6	9	8	9	Q8BMA6;A2AAN2;REV__O70145	Q8BMA6;A2AAN2	Signal recognition particle subunit SRP68
Lyn	3.52157	3.01718	8.12536e-05	15.7311	16.2842	14.8693	19.1088	18.725	19.6156	No	Yes	26.2947	0	78.432	46	16	7	14	5	16	14	15	P25911;P16277	P25911	Tyrosine-protein kinase Lyn
Pgm2	3.52039	3.75525	0.000128205	14.6671	15.107	14.5	18.2866	17.8343	18.7143	No	Yes	25.013	0	28.46	30	12	6	8	7	11	10	10	Q7TSV4;A0A0G2JG04	Q7TSV4	Phosphoglucomutase-2
Nop58	3.51977	3.80777	0.000132953	16.0893	15.8767	15.6083	18.9604	19.2942	19.879	No	Yes	25.867	0	77.309	45	13	9	8	10	10	13	12	Q6DFW4;A0A0A0MQ76;A0A087WQ46;A0A087WSU5;A0A087WSL8;A0A087WP00	Q6DFW4;A0A0A0MQ76;A0A087WQ46	Nucleolar protein 58
Pex13	3.51975	3.84319	0.000135397	9.68445	9.62949	9.34462	13.1909	12.5451	13.4818	No	Yes	20.8817	0.00028752	2.1397	3	1	1	1	1	1	1	1	Q9D0K1	Q9D0K1	Peroxisomal membrane protein PEX13
Lrrfip1	3.51873	4.32506	0.000179487	15.3309	15.772	15.2209	19.2294	18.7254	18.9252	No	Yes	24.8273	0	117.11	54	17	10	14	12	17	15	14	Q3UZ39;A0A087WSF5;G5E8E1;E9Q9T1;A0A087WPK3;A0A087WNU6;A0A087WPT0	Q3UZ39	Leucine-rich repeat flightless-interacting protein 1
Htatsf1	3.51755	2.63804	0.000144226	8.89043	8.58981	8.75347	12.8587	NaN	11.6656	Yes	Yes	17.9644	0	2.2876	1	1	0	0	0	1	0	1	Q8BGC0	Q8BGC0	HIV Tat-specific factor 1 homolog
Ly6d	3.51671	3.29207	9.65517e-05	13.6361	12.8961	13.1934	17.0161	16.0664	17.1932	No	Yes	26.8969	0	15.321	7	2	2	2	1	2	2	2	P35459	P35459	Lymphocyte antigen 6D
Vps16	3.51636	1.96327	0.000451854	NaN	10.8944	9.08116	13.5898	12.8936	14.029	No	Yes	20.3157	0	4.2768	3	1	0	1	1	1	1	1	G3X8X7;Q920Q4	G3X8X7;Q920Q4	Vacuolar protein sorting-associated protein 16 homolog
H2-Ab1	3.5159	3.98857	0.000146138	17.5494	17.6337	17.1054	20.6996	20.7595	21.3772	No	Yes	28.363	0	76.411	57	9	8	8	7	9	9	9	P14483;P06346;P06344;A0A494B9G5;P06345;P06343;P01921;A0A494B9U2	P14483;P06346;P06344;A0A494B9G5;P06345;P06343	H-2 class II histocompatibility antigen, A beta chain;H-2 class II histocompatibility antigen, A-F beta chain;H-2 class II histocompatibility antigen, A-U beta chain;H-2 class II histocompatibility antigen, A-S beta chain;H-2 class II histocompatibility antigen, A-K beta chain
Srprb	3.51583	3.9827	0.000145228	14.2864	14.6998	13.9931	17.8524	17.5264	18.148	No	Yes	25.8149	0	41.812	14	7	2	4	3	5	6	6	P47758;A0A1W2P830	P47758	Signal recognition particle receptor subunit beta
Grn	3.51565	3.17001	8.86637e-05	18.611	18.2445	17.7482	21.5695	21.1725	22.4087	No	Yes	28.7252	0	196.46	86	13	10	11	8	13	13	13	Q3U9N4;P28798;H3BJE0;H3BJ90;H3BLC9	Q3U9N4;P28798;H3BJE0	Granulins;Acrogranin;Granulin-1;Granulin-2;Granulin-3;Granulin-4;Granulin-5;Granulin-6;Granulin-7
Kif13b	3.51308	3.94152	0.0001417	12.0589	11.4967	12.0238	15.3119	15.0407	15.766	No	Yes	20.8717	0	15.845	9	7	4	3	4	6	6	7	E9Q4K7;A0A286YCV9	E9Q4K7;A0A286YCV9	Kinesin-like protein
Ezr	3.51266	2.30498	0.000336006	16.7971	18.0039	16.3426	20.8164	19.4574	21.4077	No	Yes	27.562	0	62.577	55	15	9	10	7	12	11	13	P26040	P26040	Ezrin
Mcm3	3.51265	4.18019	0.00016298	14.5971	15.3095	14.804	18.2541	18.6469	18.3475	No	Yes	24.8127	0	77.443	48	19	7	12	8	13	19	14	P25206	P25206	DNA replication licensing factor MCM3
Gimap9	3.51185	2.26809	0.000333207	13.5275	12.2055	NaN	15.9211	16.3017	16.9123	No	Yes	24.1238	0	31.123	7	4	2	2	0	3	4	4	G3X987;F7BEI3	G3X987
Sf3b6	3.51128	3.02647	8.11594e-05	13.0596	14.3252	12.8659	16.9501	16.6575	17.1768	No	Yes	25.6462	0	14.213	11	3	2	3	1	3	3	3	A0A1W2P7L7;P59708	A0A1W2P7L7;P59708	Splicing factor 3B subunit 6
Il18	3.51078	3.10568	8.48485e-05	11.9215	11.1831	12.3895	15.1845	14.928	15.914	No	Yes	22.4008	0	8.0658	7	4	2	2	2	3	3	4	P70380;K3W4N2;A0A1L1STF5	P70380;K3W4N2;A0A1L1STF5	Interleukin-18
Gm11744	3.51052	3.95809	0.000142276	14.1952	14.5148	14.0853	17.7786	17.3513	18.1971	No	Yes	27.1048	0.0087539	1.2148	6	1	1	1	1	1	1	1	J3QJU7	J3QJU7
Terf2	3.51012	4.80939	0.000231788	11.1529	11.1803	10.9421	14.4476	14.4558	14.9023	No	Yes	22.1046	0	8.752	5	2	2	1	1	2	2	2	E9QM06;D3YZ08;O35144;F6VIR4	E9QM06;D3YZ08;O35144;F6VIR4	Telomeric repeat-binding factor 2
Sh3kbp1	3.50936	3.2332	9.1683e-05	14.9504	15.6399	14.7479	19.2174	18.0871	18.5619	No	Yes	24.9805	0	106.07	46	17	10	12	8	17	13	12	Q8R550;B0R0Y8	Q8R550	SH3 domain-containing kinase-binding protein 1
Usp5	3.50925	3.98055	0.000144033	15.3903	15.9464	15.1897	18.9816	18.7759	19.2967	No	Yes	25.5728	0	104.9	45	14	9	11	8	13	14	13	Q3U4W8;P56399;D3YYA5;D3Z4K7	Q3U4W8;P56399	Ubiquitin carboxyl-terminal hydrolase;Ubiquitin carboxyl-terminal hydrolase 5
Ppif	3.50921	3.59872	0.000116667	13.8266	13.7479	13.4514	17.0863	16.6834	17.7839	No	Yes	24.7293	0	46.233	20	4	3	2	3	4	4	4	Q99KR7	Q99KR7	Peptidyl-prolyl cis-trans isomerase F, mitochondrial
Sap25	3.50911	2.80542	0.000158874	9.06621	9.72862	8.1495	12.0271	12.3715	13.073	Yes	Yes	20.9329	0.0065053	1.2794	3	1	0	0	0	1	1	1	H3BLC5;E9Q529;Q1EHW4	H3BLC5;E9Q529;Q1EHW4	Histone deacetylase complex subunit SAP25
Rrp15	3.50882	3.54086	0.000103093	10.3749	10.9299	NaN	14.0393	14.1649	14.2793	No	Yes	22.7046	0	3.5634	3	1	1	1	0	1	1	1	Q9CYX7	Q9CYX7	RRP15-like protein
9030617O03Rik	3.50636	2.16072	0.000421661	10.8179	12.4149	12.3997	15.7438	14.1258	16.282	No	Yes	22.395	0	10.797	8	6	1	2	3	5	3	4	E9QMK9;Q8BH86	E9QMK9;Q8BH86	UPF0317 protein C14orf159 homolog, mitochondrial
Stfa2l1;Stfa2	3.5047	2.53199	0.000206133	10.6176	9.88313	8.6937	13.9066	12.8208	12.9812	Yes	Yes	23.0136	0	4.0725	2	1	0	1	0	1	1	1	Q8BWM3;P35174	Q8BWM3;P35174	Stefin-2
Hprt1	3.5032	4.16636	0.000159817	16.2109	16.1604	15.8952	19.4053	19.3341	20.0368	No	Yes	27.5736	0	69.357	48	10	9	9	7	9	9	10	P00493	P00493	Hypoxanthine-guanine phosphoribosyltransferase
Ykt6	3.50288	2.85342	0.000162971	13.2845	13.5236	12.4679	16.2919	16.0522	17.4404	No	Yes	24.641	0	10.968	7	4	3	3	2	2	2	4	Q9CQW1	Q9CQW1	Synaptobrevin homolog YKT6
Thoc1	3.5019	2.60605	0.000159787	9.49293	9.63856	7.73545	12.6507	12.2258	12.4961	Yes	Yes	20.0497	0.00056211	1.9627	2	1	0	0	0	1	1	1	A0A3Q4EBV8;Q8R3N6	A0A3Q4EBV8;Q8R3N6	THO complex subunit 1
Hexb	3.50114	3.82928	0.000131827	17.1538	17.8029	17.0887	20.5896	20.7388	21.2204	No	Yes	27.8855	0	84.508	75	17	11	15	11	14	16	17	P20060	P20060	Beta-hexosaminidase subunit beta
Mat2b	3.50102	2.54169	0.000206661	13.4358	13.2623	11.4404	16.0357	16.155	16.4509	No	Yes	24.3757	0	4.4411	6	3	3	3	1	3	3	3	Q99LB6;E0CYU5	Q99LB6	Methionine adenosyltransferase 2 subunit beta
Hnrnpab	3.50071	3.83137	0.000132075	16.2477	16.8512	16.0125	20.0453	19.5518	20.0165	No	Yes	28.3162	0	36.739	37	7	6	7	6	7	7	7	Q20BD0;Q80XR6;Q99020	Q20BD0;Q80XR6;Q99020	Heterogeneous nuclear ribonucleoprotein A/B
Gar1	3.49937	3.8165	0.000130354	15.305	15.8413	14.9797	19.1716	18.8399	18.6125	No	Yes	27.229	0	13.401	19	6	4	5	3	5	5	5	Q9CY66;D3YZ09;F6SL78	Q9CY66;D3YZ09	H/ACA ribonucleoprotein complex subunit 1
Lasp1	3.49933	2.87064	0.000164583	16.999	17.1139	16.2769	21.1127	19.5255	20.2496	No	Yes	28.0968	0	48.192	50	12	10	10	9	9	8	9	Q61792;A2A6H0;A2A6G9;A2A6G7;A2A6G8;A2A6G6;A2A6G5;E9Q0N6;A2A6G0;A2A6G4	Q61792;A2A6H0;A2A6G9;A2A6G7;A2A6G8	LIM and SH3 domain protein 1
Dtx3l	3.49841	2.215	0.000402349	11.7547	11.7516	10.8333	13.5241	15.2715	16.0393	No	Yes	19.9274	0	13.122	10	4	2	2	1	2	4	4	Q3UIR3	Q3UIR3	E3 ubiquitin-protein ligase DTX3L
Pebp1	3.49737	1.88011	0.000641571	15.9048	16.9542	13.6309	19.3029	18.4546	19.2245	No	Yes	27.5601	0	27.993	21	6	4	4	3	5	6	5	P70296;D3Z1V4;D6RHS6	P70296;D3Z1V4;D6RHS6	Phosphatidylethanolamine-binding protein 1;Hippocampal cholinergic neurostimulating peptide
Dnajc2	3.49611	4.21131	0.000162602	11.5939	12.3068	11.879	15.1926	15.5462	15.5293	No	Yes	22.8975	0	33.275	7	5	3	3	3	5	4	3	E9Q9H2;E9Q9H3;P54103;Q3TRX6	E9Q9H2;E9Q9H3;P54103	DnaJ homolog subfamily C member 2;DnaJ homolog subfamily C member 2, N-terminally processed
Sdcbp	3.49587	4.08866	0.0001507	13.2396	13.6248	12.9501	16.5862	16.6228	17.0931	No	Yes	24.9322	0	44.643	23	5	4	4	3	5	5	5	Q3TMX0;O08992;H3BLG5;A2AKJ9;A2AKJ6;A2AKJ5	Q3TMX0;O08992;H3BLG5;A2AKJ9;A2AKJ6	Syntenin-1
Hnrnpu	3.49508	4.44926	0.000186667	19.4131	19.6615	19.1701	23.0906	22.6129	23.0264	No	Yes	29.4936	0	200.25	155	32	21	24	23	28	31	31	Q8VEK3;A0A087WPX7	Q8VEK3	Heterogeneous nuclear ribonucleoprotein U
Lrch4	3.49336	3.22968	9.03226e-05	13.1247	12.9598	12.0814	16.6108	15.6915	16.3437	No	Yes	22.4681	0	41.239	15	9	4	4	3	7	8	8	H3BLL3;Q921G6;H3BIX9;H3BLB4;H3BJU9;H3BL36;H3BK42	H3BLL3;Q921G6;H3BIX9	Leucine-rich repeat and calponin homology domain-containing protein 4
Ybx3	3.48731	5.01909	0.000246914	11.3949	11.6084	11.105	14.8092	14.8852	14.8759	No	Yes	23.3052	0	26.329	5	2	1	1	1	1	2	2	Q9JKB3	Q9JKB3	Y-box-binding protein 3
Prpf3	3.48723	2.40754	0.000297243	12.9193	11.2713	12.6953	16.7292	15.1518	15.4667	No	Yes	21.8703	0	10.018	7	6	3	3	3	6	4	3	Q922U1;E0CYD0	Q922U1	U4/U6 small nuclear ribonucleoprotein Prp3
Parvg	3.48407	3.67344	0.000119658	13.0982	13.1841	12.8438	17.0758	16.0123	16.4902	No	Yes	24.1713	0	12.687	12	3	2	2	2	3	3	2	E9PYG5;Q9ERD8;A0A2I3BS32;A6PW97	E9PYG5;Q9ERD8	Gamma-parvin
Nap1l4	3.48273	2.69416	0.00014684	14.671	16.1068	14.3659	18.8875	18.0805	18.6238	No	Yes	25.3084	0	102.67	36	8	5	7	4	8	8	8	B7ZNL2;Q78ZA7;A0A140LJ37;A0A140LJB5;A0A140LI78	B7ZNL2;Q78ZA7	Nucleosome assembly protein 1-like 4
Cstf1	3.48215	3.32054	8.96287e-05	NaN	10.1799	10.331	14.0545	13.3653	13.7929	No	Yes	21.6611	0.0034965	1.573	2	1	0	1	1	1	1	1	Q99LC2	Q99LC2	Cleavage stimulation factor subunit 1
Rps28	3.48196	4.6911	0.000206186	16.0869	16.4058	16.0028	19.6513	19.4206	19.8695	No	Yes	30.1917	0	7.7543	16	2	2	2	2	2	2	2	G3UYV7;P62858	G3UYV7;P62858	40S ribosomal protein S28
Ap1g2	3.48046	5.14808	0.000257827	10.3101	10.1512	10.1601	13.6345	13.4993	13.929	No	Yes	20.653	0	2.2996	2	1	1	1	1	1	1	1	O88512	O88512	AP-1 complex subunit gamma-like 2
Swap70	3.48042	3.27554	9.22266e-05	15.2822	15.822	15.3498	19.2294	18.2275	19.4384	No	Yes	25.5706	0	28.683	46	17	6	10	7	14	12	14	Q6A028	Q6A028	Switch-associated protein 70
Ndufa10	3.47967	2.738	0.000151196	15.2318	16.0224	14.3249	18.5598	18.2336	19.2245	No	Yes	25.9966	0	43.548	38	10	5	8	5	9	9	9	Q99LC3;A0A087WR38	Q99LC3	NADH dehydrogenase [ubiquinone] 1 alpha subcomplex subunit 10, mitochondrial
Hexa	3.47954	3.67394	0.000119048	16.6282	16.9871	16.1052	19.7927	19.9254	20.4411	No	Yes	27.2058	0	100.52	43	10	6	9	4	9	10	10	P29416	P29416	Beta-hexosaminidase subunit alpha
Exoc4	3.4782	1.70184	0.000818411	NaN	9.95608	10.03	14.4063	14.0665	11.9409	No	Yes	20.1343	0	7.1571	7	3	0	1	1	2	2	2	O35382	O35382	Exocyst complex component 4
Smap2	3.47813	3.87546	0.000132827	13.9234	13.5403	13.4706	17.1891	16.6601	17.5194	No	Yes	24.8749	0	14.618	18	6	5	3	3	6	4	5	Q7TN29	Q7TN29	Stromal membrane-associated protein 2
Ripk3	3.47788	4.27322	0.000165485	13.9483	14.2596	13.8889	17.5708	17.1441	17.8156	No	Yes	24.47	0	18.907	16	4	4	4	4	4	4	3	E9PZP3;Q9QZL0;A0A2I3BQW9;A0A2I3BPT3	E9PZP3;Q9QZL0	Receptor-interacting serine/threonine-protein kinase 3
Ddb1	3.4773	3.2889	9.28382e-05	15.1023	14.8207	14.2215	18.4187	17.5733	18.5844	No	Yes	24.355	0	34.037	28	12	8	8	7	11	11	12	Q3U1J4;A0A494BAF6;A0A494B987	Q3U1J4;A0A494BAF6	DNA damage-binding protein 1
Mrpl50	3.47676	3.32809	9.56938e-05	11.0689	11.109	10.937	14.186	14.0598	15.2994	No	Yes	23.7293	0	3.1263	2	1	1	1	1	1	1	1	Q8VDT9	Q8VDT9	39S ribosomal protein L50, mitochondrial
Mmp9	3.47347	3.08484	8.21114e-05	15.9239	15.8436	15.5927	20.1515	18.7218	18.9074	No	Yes	25.8335	0	35.587	40	11	9	9	7	10	10	9	P41245;A2A5K8	P41245	Matrix metalloproteinase-9
Hmgcl	3.47287	3.65624	0.000117057	14.329	14.9831	14.8148	18.1522	17.7456	18.6476	No	Yes	26.1883	0	44.029	26	5	3	5	4	5	5	5	P38060;V9GXD2;V9GWZ9;D3YVU9;Q8JZS7	P38060	Hydroxymethylglutaryl-CoA lyase, mitochondrial
Tnxb	3.47166	2.09168	0.000431553	10.9759	10.6646	NaN	13.2747	14.4837	15.1173	No	Yes	19.4271	0	3.3417	6	3	2	2	0	2	3	3	E9Q2T3;O35452;A0A571BG59;A0A5F8MPH8	E9Q2T3;O35452;A0A571BG59;A0A5F8MPH8
Rpl10a	3.47065	3.68241	0.000118343	17.2329	17.7077	16.7316	20.7824	20.3953	20.9063	No	Yes	28.991	0	55.15	55	9	6	8	7	9	9	9	A0A3B2WDD2;A0A3B2WBL1;Q5XJF6;P53026;A0A3B2W824;A0A3B2W820;A0A3B2WCA5;D6RE43	A0A3B2WDD2;A0A3B2WBL1;Q5XJF6;P53026;A0A3B2W824	Ribosomal protein;60S ribosomal protein L10a
Ptgs1	3.47045	2.91996	0.000166843	16.0762	16.6505	15.3502	19.3333	19.0028	20.1521	No	Yes	26.1686	0	56.395	57	12	10	12	8	11	11	11	P22437;Q05769	P22437	Prostaglandin G/H synthase 1
Pafah1b3	3.46895	3.05042	0.000121699	12.8672	11.5835	12.5622	15.8898	15.3126	16.2174	No	Yes	23.9454	0	3.5182	8	2	2	1	2	2	2	2	Q61205;D3Z7E6;D3Z2X5	Q61205;D3Z7E6;D3Z2X5	Platelet-activating factor acetylhydrolase IB subunit gamma
Lzic	3.46864	3.50184	0.000106707	13.4146	12.4137	13.3614	16.7149	16.2389	16.6417	No	Yes	24.8381	0	29.175	17	6	4	2	4	6	5	5	Q8K3C3;B1AS03;B1AS04	Q8K3C3	Protein LZIC
Bcas2	3.46808	3.60529	0.00011336	13.0027	13.0652	12.5022	16.17	15.9276	16.8767	No	Yes	22.1821	0	16.285	14	3	1	2	1	3	2	3	Q9D287;D6RGA5	Q9D287	Pre-mRNA-splicing factor SPF27
Vars	3.46789	3.59684	0.000112812	16.6203	17.1263	16.2951	20.4318	19.6811	20.3324	No	Yes	25.9875	0	120.18	66	17	14	16	12	15	15	16	Q9Z1Q9;G3UY93;G3UZ22;G3UYW2;G3UZX1	Q9Z1Q9;G3UY93	Valine--tRNA ligase
Dock2	3.46633	3.66366	0.000116764	16.5424	16.6336	15.9717	19.7159	19.4988	20.3319	No	Yes	25.1654	0	104.64	104	29	20	23	19	28	27	28	Q8C3J5;Q5SRI3;D6RGU3;Q3TMS1	Q8C3J5;Q5SRI3	Dedicator of cytokinesis protein 2
Bod1l;Bod1	3.46571	3.84229	0.000128088	10.3558	10.266	10.0976	14.1262	13.1705	13.8199	No	Yes	18.8359	0	5.1933	2	2	1	1	1	2	1	2	E9Q6J5;Q5SQY2	E9Q6J5;Q5SQY2	Biorientation of chromosomes in cell division protein 1
Csf1r	3.46563	3.37718	9.80392e-05	13.9961	13.9785	13.6178	17.1664	16.7967	18.0262	No	Yes	24.1366	0	11.568	17	6	5	5	4	5	5	6	P09581	P09581	Macrophage colony-stimulating factor 1 receptor
Elavl1	3.4648	5.06321	0.000242215	16.3863	16.427	16.1659	19.9312	19.5567	19.8857	No	Yes	27.6267	0	53.16	41	11	6	7	6	11	9	10	P70372	P70372	ELAV-like protein 1
Crip1	3.46352	1.87154	0.00065864	14.8706	16.4764	13.1995	18.53	17.6003	18.8068	No	Yes	27.7049	0	3.1126	13	2	2	2	2	2	2	2	A0A0G2JEK2;P63254	A0A0G2JEK2;P63254	Cysteine-rich protein 1
Fndc3a	3.46227	2.81602	0.000154448	NaN	11.7801	10.7359	14.6517	14.7396	14.7696	No	Yes	19.8939	0	8.3381	9	3	0	2	1	3	3	3	Q8BX90;F6TLV3;E0CXY0	Q8BX90;F6TLV3;E0CXY0	Fibronectin type-III domain-containing protein 3A
Stk4	3.46193	3.41609	0.000100215	15.5171	16.2237	15.3329	19.3902	18.6356	19.4336	No	Yes	26.0474	0	67.972	59	19	11	13	12	18	17	18	Q9JI11;A2A5M9;Q8CDG4;F7BYZ4;D6RHQ9	Q9JI11	Serine/threonine-protein kinase 4;Serine/threonine-protein kinase 4 37kDa subunit;Serine/threonine-protein kinase 4 18kDa subunit
Hnrnpf	3.46147	3.43547	0.00010167	16.9266	18.0554	17.1844	20.8907	20.582	21.0781	No	Yes	28.3804	0	122.5	77	13	8	12	8	13	12	13	Q9Z2X1;J3QM80;J3QMT0;J3QP45;J3QNH2;J3QMV8	Q9Z2X1;J3QM80	Heterogeneous nuclear ribonucleoprotein F;Heterogeneous nuclear ribonucleoprotein F, N-terminally processed
Msn	3.4609	3.64448	0.000114848	19.7871	20.0172	19.1065	23.0959	22.7867	23.411	No	Yes	29.7319	0	221.47	220	38	27	30	25	35	35	35	P26041	P26041	Moesin
Myh11	3.46072	1.84931	0.00065693	14.9501	14.1048	14.1123	15.9363	18.3597	19.2534	No	Yes	23.7912	0	58.19	22	11	7	7	7	8	8	9	A0A2R8VHF9;E9QPE7;A0A338P6K2;O08638	A0A2R8VHF9;E9QPE7;A0A338P6K2;O08638	Myosin-11
Ighv9-4;Ighv9-3;Ighv9-2	3.45978	4.974	0.000232172	9.26728	9.69212	9.58056	13.0876	12.8177	13.0141	Yes	Yes	22.709	0	2.3968	1	1	0	0	0	1	1	1	A0A075B5S9;A0A0B4J1J5;A0A0B4J1J4;A0A0A6YWH6	A0A075B5S9;A0A0B4J1J5;A0A0B4J1J4;A0A0A6YWH6
Thy1	3.45925	3.37474	9.7493e-05	14.8634	15.5583	14.4408	18.247	18.1742	18.8192	No	Yes	27.5135	0	15.553	16	3	3	3	3	3	3	3	A0A1L1SUX8;P01831	A0A1L1SUX8;P01831	Thy-1 membrane glycoprotein
Eif4g1	3.45893	4.27953	0.000161663	14.9538	14.6474	14.2697	17.9154	18.048	18.2843	No	Yes	23.7828	0	37.707	49	17	8	10	10	16	16	15	E9PVC5;Q6NZJ6;E9Q9E1;E9PVC6;A0A0J9YUS5;E9Q770;A0A0J9YUC1;A0A0J9YVC1;A0A338P7C5;D3YWM1;D6RCH1;A0A338P758;D3YWC6;D3YWY7;A0A0J9YTV0;A0A0J9YUL1;A0A0J9YU44;D3Z439	E9PVC5;Q6NZJ6;E9Q9E1;E9PVC6;A0A0J9YUS5;E9Q770;A0A0J9YUC1;A0A0J9YVC1	Eukaryotic translation initiation factor 4 gamma 1
Acsf2	3.45871	3.73658	0.000122058	17.1067	17.5144	17.0706	20.8631	20.1499	21.0548	No	Yes	27.818	0	135.33	94	23	14	17	14	20	22	21	Q8VCW8	Q8VCW8	Acyl-CoA synthetase family member 2, mitochondrial
Phf3	3.45869	1.65426	0.000879926	10.4187	9.96282	9.34145	11.0686	14.3429	14.6875	Yes	Yes	17.1057	0	2.9169	3	2	0	0	1	1	2	2	B2RQG2	B2RQG2
Rps24	3.45859	3.06016	0.00012156	15.3874	16.2398	15.1917	18.4348	19.1808	19.5791	No	Yes	28.1049	0	16.56	31	6	4	5	4	6	6	6	P62849;A0A286YEB7	P62849;A0A286YEB7	40S ribosomal protein S24
Cyp4f3;Cyp4f17;Cyp4f15	3.45558	2.3856	0.000321386	NaN	11.2631	10.5051	14.9101	14.4558	13.6532	No	Yes	21.7209	0	7.0951	6	2	0	1	1	2	2	2	Q99N16;A0A1D5RLD0;G3UW78;Q8VCA4;Q99N18	Q99N16;A0A1D5RLD0;G3UW78;Q8VCA4;Q99N18	Leukotriene-B(4) omega-hydroxylase 2
Psmc1	3.45485	4.19683	0.000152838	16.0008	15.8213	15.3636	19.1994	18.932	19.4188	No	Yes	25.8902	0	142.38	59	16	10	8	8	16	15	14	P62192	P62192	26S protease regulatory subunit 4
Gls	3.45468	2.78249	0.000152731	14.2685	15.0303	13.7203	18.2725	17.002	18.1087	No	Yes	23.8635	0	68.809	26	12	5	9	4	10	10	11	D3Z7P3;D3Z7P4;F6U529	D3Z7P3;D3Z7P4	Glutaminase kidney isoform, mitochondrial
Farsb	3.45401	3.73879	0.000121633	15.3596	15.7008	14.8492	18.7067	18.4647	19.1002	No	Yes	25.4908	0	27.227	50	17	12	12	11	15	15	15	Q9WUA2;A0A087WS80;A0A087WPV4;A0A087WQ15	Q9WUA2	Phenylalanine--tRNA ligase beta subunit
Pus1	3.4537	2.91123	0.000164498	11.1722	12.6144	11.6381	14.8431	15.1512	15.7914	No	Yes	22.7091	0	5.2831	4	2	1	2	1	2	2	2	H7BX59;Q9WU56	H7BX59;Q9WU56	tRNA pseudouridine synthase;tRNA pseudouridine synthase A, mitochondrial
Abhd12	3.4528	3.12319	8.30861e-05	13.4959	14.3218	13.3452	16.7654	16.9345	17.8213	No	Yes	23.7943	0	23.285	22	7	2	5	2	5	5	5	Q99LR1;D6RFU2;F7BHM8;D6RI21	Q99LR1;D6RFU2	Monoacylglycerol lipase ABHD12
Vav1	3.4521	3.99143	0.000136986	15.1903	15.2755	14.9865	18.4165	18.2906	19.1016	No	Yes	25.0417	0	42.985	39	15	9	12	9	13	14	15	E9PXI0;P27870;Q8VDU4;Q9R0C8	E9PXI0;P27870;Q8VDU4	Proto-oncogene vav
Atp5e	3.452	3.71072	0.000118243	15.9108	15.4122	15.2738	19.2201	18.4896	19.2432	No	Yes	29.5213	0	3.1614	16	3	3	3	3	3	3	3	P56382	P56382	ATP synthase subunit epsilon, mitochondrial
Dpf2	3.45178	3.61349	0.000112269	12.2495	12.8978	12.2222	15.69	15.6302	16.4047	No	Yes	23.1298	0	13.819	11	4	2	3	2	4	3	4	D3Z5N6;Q61103;F8WIP7;A0A494BBF7	D3Z5N6;Q61103	Zinc finger protein ubi-d4
Hnrnph3	3.45061	3.97854	0.000136054	11.6859	11.9403	11.3593	14.7306	15.157	15.4498	No	Yes	22.9347	0	18.31	12	2	1	2	1	1	2	2	D3YWT1;D3Z3N4	D3YWT1;D3Z3N4
Crocc	3.44989	3.32391	8.7995e-05	14.7582	NaN	14.5589	18.0867	17.7824	18.4562	No	Yes	23.3894	0.00028466	2.0492	4	2	1	1	1	2	1	1	Q8CJ40;B7ZC90	Q8CJ40;B7ZC90	Rootletin
Eif5	3.44908	4.21334	0.000153341	14.5055	14.7015	14.0983	17.8488	17.6411	18.1626	No	Yes	24.93	0	21.32	28	8	6	5	5	7	7	8	P59325;Q8BVV6;A0A1Y7VNP4;A0A1Y7VJG2;A0A1Y7VKT5;A0A1Y7VLL6;A0A1Y7VLQ0;A0A1Y7VLK2	P59325;Q8BVV6;A0A1Y7VNP4;A0A1Y7VJG2	Eukaryotic translation initiation factor 5
Rhog	3.44869	3.94725	0.000133971	17.0675	17.5853	17.0737	20.8215	20.2757	20.9753	No	Yes	29.1013	0	90.661	41	8	7	7	6	8	8	8	P84096;A0A1B0GSL4	P84096	Rho-related GTP-binding protein RhoG
Wapal	3.44868	2.87398	0.000160081	8.27197	7.22375	8.25813	12.0256	10.6869	11.3874	Yes	Yes	17.3507	0	9.6667	1	1	0	0	0	1	1	1	B7ZP47;Q65Z40	B7ZP47;Q65Z40	Wings apart-like protein homolog
Ostf1	3.44668	3.73308	0.00011976	15.2514	14.3337	14.5482	18.3409	17.8882	18.2443	No	Yes	25.9111	0	55.135	28	8	4	3	4	8	7	7	A0A494BA97;Q62422	A0A494BA97;Q62422	Osteoclast-stimulating factor 1
Myo18a	3.44586	3.68713	0.000116279	14.8049	14.5095	14.205	17.8714	17.5363	18.4491	No	Yes	23.024	0	48.49	29	15	8	8	8	12	11	12	E9Q405;A0A1C7ZN10;K3W4L0;B2RRE2;E9QAX2;Q9JMH9;E9QA74	E9Q405;A0A1C7ZN10;K3W4L0;B2RRE2;E9QAX2;Q9JMH9;E9QA74	Unconventional myosin-XVIIIa
Nfs1	3.44558	3.22962	8.75547e-05	13.9994	13.8748	13.0288	16.9129	16.6903	17.6365	No	Yes	23.2578	0	8.4827	19	7	4	4	4	5	5	5	Q9Z1J3;F7CZD1;F6TXD3	Q9Z1J3	Cysteine desulfurase, mitochondrial
	3.44465	3.35096	9.42127e-05	13.6858	14.1114	13.3271	16.8713	16.805	17.782	No	Yes	24.9121	0	38.871	22	8	6	7	4	8	8	8	Q91V76;A0A1L1SSF8;A0A1L1ST86	Q91V76;A0A1L1SSF8	Ester hydrolase C11orf54 homolog
App	3.44388	3.35554	9.46586e-05	10.1947	9.72011	9.0719	13.0175	12.7956	13.5053	Yes	Yes	20.505	0.00056577	1.9984	0	1	0	1	0	1	1	1	A0A2I3BR03;A0A2I3BPT1;A0A2I3BQZ9;Q3TWF3;P12023	A0A2I3BR03;A0A2I3BPT1;A0A2I3BQZ9;Q3TWF3;P12023	Amyloid beta A4 protein;N-APP;Soluble APP-alpha;Soluble APP-beta;C99;Beta-amyloid protein 42;Beta-amyloid protein 40;C83;P3(42);P3(40);C80;Gamma-secretase C-terminal fragment 59;Gamma-secretase C-terminal fragment 57;Gamma-secretase C-terminal fragment 50;C31
Myl10	3.4432	1.67586	0.000869565	NaN	11.4741	10.0207	NaN	14.1162	14.265	No	Yes	22.7151	0	2.8866	2	1	0	1	1	0	1	1	A0A0G2JDZ4;E9QNY3	A0A0G2JDZ4;E9QNY3
Rabif	3.44274	3.08436	0.000118568	11.275	NaN	11.1661	14.487	14.3605	15.1424	No	Yes	24.4785	0.0011047	1.8177	2	1	1	0	1	1	1	1	Q91X96	Q91X96	Guanine nucleotide exchange factor MSS4
Mtco2	3.4424	4.33273	0.000163361	16.6347	16.7431	16.3338	19.7381	19.9499	20.3508	No	Yes	29.1498	0	13.678	20	3	2	2	2	2	2	2	P00405	P00405	Cytochrome c oxidase subunit 2
Pds5b	3.44225	3.53388	0.000106302	12.8756	13.5175	12.7369	16.5219	16.0333	16.9016	No	Yes	21.0092	0	6.1399	11	5	2	4	2	5	4	5	F8WHU5;Q4VA53	F8WHU5;Q4VA53	Sister chromatid cohesion protein PDS5 homolog B
Lin7c	3.44106	2.43434	0.000296887	12.4398	13.8569	11.8049	16.4801	15.5065	16.4381	No	Yes	24.8221	0	4.9673	6	4	2	4	2	4	3	3	O88952;Q3TUM0;O88951;Q8JZS0	O88952	Protein lin-7 homolog C
Sec61b;Gm10320	3.44062	2.40967	0.00032164	15.0853	15.1683	14.5902	19.5108	17.1873	18.4677	No	Yes	28.0629	0	5.8516	7	2	2	2	1	2	1	2	Q9CQS8;E9PW43	Q9CQS8;E9PW43	Protein transport protein Sec61 subunit beta
Nudcd2	3.44061	2.61654	0.000210526	12.4396	12.4848	10.9381	15.9559	14.7951	15.4333	No	Yes	24.9448	0	11.501	5	3	2	3	1	3	3	3	E0CYQ2;Q9CQ48	E0CYQ2;Q9CQ48	NudC domain-containing protein 2
Sec24b	3.43963	3.20926	8.63664e-05	13.0116	13.3722	12.2327	16.822	16.0736	16.0397	No	Yes	22.3763	0	40.036	17	5	3	5	3	5	5	4	Q80ZX0;F6VJC5	Q80ZX0
Tubb2a	3.43893	2.57165	0.000205433	14.2333	15.3017	13.4843	17.8097	17.1783	18.3481	No	Yes	25.498	0	35.54	14	5	5	5	2	5	5	5	Q7TMM9	Q7TMM9	Tubulin beta-2A chain
Stx7	3.43827	3.83171	0.000124444	16.2143	16.7628	16.0383	19.6365	19.5354	20.1582	No	Yes	28.4536	0	82.071	30	9	7	8	7	9	9	9	Q8BH40;O70439	Q8BH40;O70439	Syntaxin-7
Vti1b	3.43805	3.66222	0.000113821	14.9339	15.2604	15.0615	18.3671	18.0862	19.1167	No	Yes	27.0312	0	51.251	28	8	4	5	5	6	6	7	Q91XH6;O88384;F6UHS3;E0CYE5;F6T4B9	Q91XH6;O88384;F6UHS3	Vesicle transport through interaction with t-SNAREs homolog 1B
Farsa	3.43773	4.01642	0.000136852	14.8172	14.7927	14.3279	17.9438	17.8159	18.4913	No	Yes	24.8719	0	48.697	33	11	4	7	5	10	11	11	Q8C0C7;E9PWY9;D6RIJ2	Q8C0C7;E9PWY9	Phenylalanine--tRNA ligase alpha subunit
Ciapin1	3.43722	2.19197	0.000421508	7.80775	10.1374	7.73193	12.0961	11.7052	12.1875	Yes	Yes	19.9474	0	6.5234	2	1	0	1	0	1	1	1	Q8WTY4	Q8WTY4	Anamorsin
Ddt	3.43587	3.2816	8.97436e-05	15.5181	15.0361	15.4498	18.244	18.5723	19.4954	No	Yes	27.1924	0	53.174	19	6	5	2	5	5	6	6	O35215;G3UZN1	O35215;G3UZN1	D-dopachrome decarboxylase
Pdia3	3.43136	3.60637	0.000110323	20.9955	21.1617	20.3071	24.1978	23.9292	24.6313	No	Yes	30.6732	0	323.31	250	38	33	31	27	36	36	36	P27773;F6Q404	P27773	Protein disulfide-isomerase A3
Col4a1;Col4a5	3.43085	2.54185	0.000225	15.702	15.6278	14.5933	18.0195	18.4308	19.7653	No	Yes	23.0191	0	40.637	26	4	3	4	3	4	4	4	P02463;A0A1B0GRC0;A0A1B0GSI7;F7CK55;Q63ZW6	P02463;A0A1B0GRC0;A0A1B0GSI7;F7CK55;Q63ZW6	Collagen alpha-1(IV) chain;Arresten
Plec	3.43048	4.23006	0.000151515	16.5083	16.3398	15.9309	19.8588	19.3839	19.8278	No	Yes	23.2956	0	183.82	116	56	29	32	28	49	45	44	Q9QXS1;E9Q3W4;A0A3B2W7J8;A0A0R4J223;E9Q9J6;A0A0R4J221;A0A0R4J218;E9PW24;A0A7N9VRC4;Q8R0W0	Q9QXS1;E9Q3W4	Plectin
Gbas	3.43044	2.07487	0.000459993	12.9596	14.3148	12.3004	16.1837	15.8092	17.8732	No	Yes	24.9957	0	6.0773	8	4	3	3	2	2	3	3	O55126;Q7TMG8;A0A0G2JEV1	O55126;Q7TMG8	Protein NipSnap homolog 2
Rfc3	3.42871	3.1478	8.30368e-05	12.425	12.387	11.4868	14.9414	16.0008	15.6428	No	Yes	22.7917	0	16.486	8	5	4	4	3	3	5	4	Q8R323	Q8R323	Replication factor C subunit 3
Ddx21	3.42859	4.82819	0.000204678	17.0027	16.9545	16.6656	20.3526	20.0684	20.4877	No	Yes	26.1544	0	121.8	84	27	18	19	18	24	25	23	Q9JIK5	Q9JIK5	Nucleolar RNA helicase 2
Eif2s1	3.42847	4.69164	0.000193638	16.1338	15.6758	15.861	19.1241	19.3103	19.5216	No	Yes	26.9518	0	45.946	33	13	8	7	9	10	11	12	Q6ZWX6	Q6ZWX6	Eukaryotic translation initiation factor 2 subunit 1
Cstf2	3.42774	4.21079	0.000149573	13.9953	14.2876	13.8932	17.6446	17.0889	17.7258	No	Yes	25.1494	0	13.998	19	6	4	4	4	6	6	5	A2AEK1;Q8BIQ5;A2AEJ8;F6ZKC7;Q8C7E9;A2AEK3	A2AEK1;Q8BIQ5;A2AEJ8	Cleavage stimulation factor subunit 2
Add3	3.42752	3.3173	9.10865e-05	13.432	14.1457	13.0822	17.4044	16.5747	16.9633	No	Yes	24.2959	0	18.265	13	8	4	6	4	7	6	5	Q9QYB5;A0A494B9K4;A0A494BBK1;A0A494BAX9;A0A494B969	Q9QYB5;A0A494B9K4	Gamma-adducin
Psme1	3.42672	3.52775	0.000104948	18.7559	19.026	18.1662	21.8161	21.8621	22.55	No	Yes	29.4559	0	158.76	128	16	15	16	15	16	16	16	G3UXZ5;P97371;G3UXY0;G3X9K9;G3UWN9;G3UXR1	G3UXZ5;P97371;G3UXY0;G3X9K9;G3UWN9	Proteasome activator complex subunit 1
Gm10094;Sap18	3.42602	4.09021	0.00013986	14.808	15.1154	14.5548	18.2402	17.9301	18.586	No	Yes	26.055	0	34.087	23	5	4	3	3	5	5	5	E9Q317;O55128;D3YY73;D3Z2N9;D3YY55	E9Q317;O55128;D3YY73;D3Z2N9	Histone deacetylase complex subunit SAP18
Sri	3.42578	4.72344	0.000194986	17.0048	17.0993	16.9744	20.5821	20.1182	20.6555	No	Yes	28.9155	0	37.314	36	9	7	8	7	8	8	8	Q6P069	Q6P069	Sorcin
Ecsit	3.42489	2.37964	0.000316279	9.71152	11.7003	11.3832	14.6078	13.6765	14.7854	No	Yes	21.8081	0	4.3628	4	2	1	2	2	2	2	2	Q9QZH6;A0A0R4J174;J3KMM6	Q9QZH6;A0A0R4J174;J3KMM6	Evolutionarily conserved signaling intermediate in Toll pathway, mitochondrial
Map1lc3a;Map1lc3b	3.42202	3.89955	0.000126697	11.1152	11.4372	11.3935	14.4267	14.5323	15.2529	No	Yes	24.917	0.0082602	1.2268	3	1	1	1	1	1	1	1	Q91VR7;Q9CQV6	Q91VR7;Q9CQV6	Microtubule-associated proteins 1A/1B light chain 3A;Microtubule-associated proteins 1A/1B light chain 3B
Prosc	3.42017	4.17534	0.00014629	14.9341	15.1942	14.7494	18.3268	18.0648	18.7466	No	Yes	26.5162	0	27.393	25	8	4	4	4	6	6	6	Q9Z2Y8;A0A1B0GRP7;Q6P8V7;A0A1B0GRR5;Q80ZV3;A0A1B0GSP5;A0A1B0GQY5;A0A1B0GSA1	Q9Z2Y8;A0A1B0GRP7;Q6P8V7;A0A1B0GRR5;Q80ZV3	Proline synthase co-transcribed bacterial homolog protein
Dhodh	3.41998	3.50388	0.000102639	13.4347	12.4901	12.9777	16.0169	16.3605	16.7851	No	Yes	22.8775	0	22.029	11	8	4	3	4	7	8	8	O35435;E9Q1V3;F6TCT7;D3YZY5;F6ZQJ5	O35435;E9Q1V3	Dihydroorotate dehydrogenase (quinone), mitochondrial
Prrc2c	3.41948	2.62664	0.000209796	12.507	12.4216	11.8529	16.594	14.6467	15.7994	No	Yes	21.3274	0	10.206	6	6	4	4	3	5	1	4	S4R294;S4R2J9;A0A0A0MQ79;Q3TLH4;S4R2E2;S4R2L9;S4R209	S4R294;S4R2J9;A0A0A0MQ79;Q3TLH4	Protein PRRC2C
Spn	3.41937	4.06296	0.00013739	11.979	12.5884	12.0833	15.9713	15.4318	15.5057	No	Yes	24.5938	0	19.096	6	2	2	2	2	2	2	1	A0A0U1RNN5;P15702	A0A0U1RNN5;P15702	Leukosialin
Ppia	3.4185	4.11031	0.000140421	20.4568	20.6977	20.3514	23.7618	23.6379	24.3617	No	Yes	32.1549	0	146.43	160	11	9	10	10	10	11	11	P17742;A0A1L1SST0;V9GXC1;V9GX31;A0A1L1SRX5	P17742;A0A1L1SST0	Peptidyl-prolyl cis-trans isomerase A;Peptidyl-prolyl cis-trans isomerase A, N-terminally processed
Prpf4b	3.41796	3.78535	0.000120378	12.9665	13.6651	12.9592	16.421	16.4417	16.982	No	Yes	22.411	0	23.167	23	8	4	7	5	7	8	8	Q61136;A0A1Y7VLT3	Q61136	Serine/threonine-protein kinase PRP4 homolog
Skiv2l2	3.41754	3.44765	9.88003e-05	12.2798	12.6449	11.646	15.9019	15.1849	15.7365	No	Yes	21.8697	0	14.759	9	6	3	3	2	6	5	5	Q9CZU3	Q9CZU3	Superkiller viralicidic activity 2-like 2
Arhgef2	3.41634	3.39338	9.47867e-05	14.3042	15.1177	14.2431	18.1199	17.4875	18.3066	No	Yes	24.0842	0	38.029	29	14	8	11	7	11	12	12	H3BJU7;H3BJ45;H3BJ40;H3BKH9;H3BJX8;Q60875;H3BLF9;H3BJ59;H3BL15;H3BJM4;H3BJ48;H3BLJ1;H3BIX8	H3BJU7;H3BJ45;H3BJ40;H3BKH9;H3BJX8;Q60875	Rho guanine nucleotide exchange factor 2
Gtpbp1	3.41547	3.77648	0.000119352	13.2546	13.5033	13.0877	16.165	16.855	17.0719	No	Yes	23.8378	0	29.244	18	7	3	3	3	5	7	6	O08582;A0A2R8W6Z1;A0A2R8W6M4;A0A2R8VKJ2	O08582;A0A2R8W6Z1	GTP-binding protein 1
Ndufb5	3.414	2.5261	0.000239541	12.1659	13.6365	11.6805	16.0888	15.4084	16.2278	No	Yes	26.0471	0.0019053	1.6876	10	2	1	2	1	2	2	2	D3Z568;Q9CQH3;F6Y6V5;D3YX99;D3Z6W9	D3Z568;Q9CQH3;F6Y6V5;D3YX99;D3Z6W9	NADH dehydrogenase [ubiquinone] 1 beta subcomplex subunit 5, mitochondrial
Pddc1	3.41383	3.74006	0.000116473	11.8252	11.4081	10.9533	14.7453	14.5477	15.1351	No	Yes	23.2584	0	7.1982	8	3	1	1	1	2	2	3	Q8BFQ8	Q8BFQ8	Parkinson disease 7 domain-containing protein 1
Emilin1	3.41148	2.93999	0.000163476	14.0627	15.1511	14.2733	17.2696	17.9221	18.5298	No	Yes	24.2156	0	70.685	34	12	6	10	7	11	12	12	Q99K41	Q99K41	EMILIN-1
Inpp1	3.41043	2.70743	0.000143116	12.2617	12.1207	10.5705	15.3484	14.7376	15.0982	No	Yes	23.1	0	21.265	7	2	1	2	1	2	1	1	P49442;E0CYQ4;E0CX64;H3BK26	P49442;E0CYQ4;E0CX64;H3BK26	Inositol polyphosphate 1-phosphatase
Gm27029;Aarsd1	3.4098	2.07189	0.000461432	10.2537	NaN	11.4751	14.3546	13.5126	14.9554	No	Yes	21.2846	0	8.1104	4	3	1	0	3	2	2	3	A2A4P4;A2A4P3;Q3THG9	A2A4P4;A2A4P3;Q3THG9	Alanyl-tRNA editing protein Aarsd1
Nagpa	3.40774	2.84035	0.000152657	10.5027	NaN	9.82545	13.6566	13.1585	13.9003	No	Yes	21.1567	0.00028588	2.0852	0	1	1	0	1	1	1	1	Q8BJ48	Q8BJ48	N-acetylglucosamine-1-phosphodiester alpha-N-acetylglucosaminidase
Arcn1	3.40768	4.41973	0.000163551	15.5152	14.8879	15.1785	18.7895	18.5294	18.4857	No	Yes	25.3336	0	57.918	51	14	9	7	9	13	13	14	Q5XJY5	Q5XJY5	Coatomer subunit delta
Eif3e	3.40745	3.36007	9.18635e-05	14.6684	15.7386	14.5871	18.4113	18.2456	18.5596	No	Yes	25.3308	0	24.619	35	11	6	9	6	10	9	8	P60229	P60229	Eukaryotic translation initiation factor 3 subunit E
Cnpy4	3.40712	3.633	0.000109375	12.6392	12.7984	13.1538	16.0668	15.9089	16.8371	No	Yes	23.6699	0	12.185	9	5	2	2	2	4	4	5	Q8BQ47;D3Z0T5	Q8BQ47;D3Z0T5	Protein canopy homolog 4
Sp100	3.40701	3.96734	0.00012963	16.5467	16.2219	15.9694	19.7111	19.268	19.98	No	Yes	27.0504	0	79.068	54	16	11	14	10	16	15	15	Q8C405;E9QA05;O35892;A0A1B0GX24;E9Q4Y0;D6RIJ4;Q99388	Q8C405;E9QA05;O35892;A0A1B0GX24;E9Q4Y0;D6RIJ4	Nuclear autoantigen Sp-100
Rbm3	3.40614	5.14704	0.000230263	15.8459	15.9966	15.73	19.2152	19.1027	19.4731	No	Yes	27.2193	0	84.545	37	4	4	4	3	4	4	4	O89086;Q8BG13;S4R2M6	O89086;Q8BG13;S4R2M6	RNA-binding protein 3
Tollip	3.40608	2.09651	0.000462396	11.7957	12.1508	9.88444	15.627	14.1027	14.3195	No	Yes	23.3024	0	3.9578	4	2	1	1	1	2	1	1	Q9QZ06;A9JEI5;Q8C5G6;F7AT44	Q9QZ06;A9JEI5;Q8C5G6;F7AT44	Toll-interacting protein
Ptk2b	3.4044	3.9462	0.000127737	14.5423	15.169	14.5575	18.4495	17.85	18.1825	No	Yes	24.0678	0	65.74	47	18	9	12	8	18	14	13	E9Q2A6;Q3UDE9;Q9QVP9;F7CCX1	E9Q2A6;Q3UDE9;Q9QVP9;F7CCX1	Protein-tyrosine kinase 2-beta
Ptma	3.40378	5.00122	0.000214724	17.6709	18.0323	17.6834	21.2518	21.033	21.3131	No	Yes	31.6483	0	34.949	26	5	2	1	1	5	5	5	P26350;A0A087WP98;A0A087WPN6;A0A087WQN2	P26350	Prothymosin alpha;Prothymosin alpha, N-terminally processed;Thymosin alpha
Qki	3.4034	3.96151	0.000128676	13.0421	13.0318	12.8489	16.0444	16.1995	16.8891	No	Yes	22.7103	0	6.601	9	3	2	2	2	2	3	3	Q9QYS9;A0A3B2WCH2	Q9QYS9;A0A3B2WCH2	Protein quaking
Rpe	3.40306	2.93578	0.000162218	10.0693	11.5276	11.4763	14.6708	14.2682	14.3435	No	Yes	24.6819	0	32.945	6	1	1	1	1	1	1	1	M0QWJ2;A0A087WQM3;M0QWQ0;B2KGF0;Q8VEE0	M0QWJ2;A0A087WQM3;M0QWQ0;B2KGF0;Q8VEE0	Ribulose-phosphate 3-epimerase
Dhrs7b	3.40119	4.13668	0.000139721	11.914	12.2228	11.9352	15.185	15.2275	15.8631	No	Yes	22.884	0	20.756	10	3	1	2	2	3	3	3	Z4YKT6;Q99J47	Z4YKT6;Q99J47	Dehydrogenase/reductase SDR family member 7B
Kiaa0020	3.40008	3.84105	0.000122271	12.4669	12.4592	11.7666	15.3776	15.5672	15.9482	No	Yes	22.3338	0	17.406	9	5	2	3	2	4	5	5	A0A0N4SUH4;Q8BKS9;A0A494BB98;A0A494BBI7	A0A0N4SUH4;Q8BKS9	Pumilio domain-containing protein KIAA0020
Itgad	3.40006	3.70627	0.000113177	17.432	17.7918	17.1223	20.3653	21.0594	21.1216	No	Yes	26.6967	0	114.75	116	26	18	23	17	24	24	23	H3BKX8;E9PXZ7;Q3V0T4	H3BKX8;E9PXZ7;Q3V0T4	Integrin alpha-D
Nisch	3.39829	2.74717	0.000144888	9.83303	9.85248	9.59413	12.6326	13.6838	NaN	No	Yes	18.934	0	5.2807	2	2	1	1	1	1	2	0	Q80TM9;F6ZL69	Q80TM9;F6ZL69	Nischarin
Ywhaz	3.39682	3.8351	0.000121739	20.1082	20.2734	19.58	23.4249	23.0245	23.7026	No	Yes	31.4102	0	194.52	120	15	11	11	11	15	15	14	P63101;A0A2I3BQ03;D3YXN6;D3YXF4;D3YW45	P63101;A0A2I3BQ03	14-3-3 protein zeta/delta
Ndufb3	3.39656	3.23071	8.47971e-05	13.0655	13.853	13.1189	16.4228	16.4145	17.3898	No	Yes	26.2785	0	5.9339	9	3	1	2	2	3	3	3	Q9CQZ6	Q9CQZ6	NADH dehydrogenase [ubiquinone] 1 beta subcomplex subunit 3
Kiaa2013	3.39599	3.19395	0.000121629	NaN	10.8812	10.4588	14.1366	13.7168	14.3446	No	Yes	21.7802	0.001109	1.842	3	1	0	1	1	1	1	1	Q91X21	Q91X21	Uncharacterized protein KIAA2013
Csnk2b	3.39511	3.39678	9.32712e-05	13.4305	13.9403	12.67	16.7773	16.6454	16.8033	No	Yes	25.9143	0	8.734	9	3	2	3	1	3	3	3	G3UXG7;P67871;G3UZA4;G3UZJ5;G3UZX4;G3UXU2	G3UXG7;P67871;G3UZA4;G3UZJ5;G3UZX4	Casein kinase II subunit beta
Pabpc1	3.3951	3.78495	0.000117351	17.3819	17.3574	16.6532	20.4652	20.2593	20.8532	No	Yes	26.8355	0	145.29	109	26	15	19	15	24	23	24	P29341;Q9D4E6;A0A2I3BR37;F6ZAX1;A2A5N3;Q8C7D3	P29341	Polyadenylate-binding protein 1
Hpcal1;Hpca	3.39485	3.97556	0.00012844	15.0784	15.3609	14.8601	18.2478	18.3007	18.9354	No	Yes	26.1434	0	25.669	40	10	6	6	6	8	8	8	P62748;A0A1Y7VMK3;P84075;A2A7R5;E9PV73;D3Z2Z8;D3YVA2;Q91X97;D3Z1M0	P62748;A0A1Y7VMK3;P84075;A2A7R5;E9PV73	Hippocalcin-like protein 1;Neuron-specific calcium-binding protein hippocalcin
Vps36	3.39442	3.08536	0.000118635	12.5681	12.26	11.5663	15.8781	14.8508	15.8487	No	Yes	23.0429	0	12.802	11	6	2	2	2	5	4	4	Q91XD6	Q91XD6	Vacuolar protein-sorting-associated protein 36
Ss18	3.39431	3.28987	8.75e-05	9.59724	9.24452	9.94841	13.6009	12.4221	12.9501	Yes	Yes	22.7324	0	5.3547	1	1	0	0	0	1	1	1	A0A3Q4EGQ6;Q8VHA8;Q8BKL1;Q8BJJ6;Q62280	A0A3Q4EGQ6;Q8VHA8;Q8BKL1;Q8BJJ6;Q62280	Protein SSXT
Ero1l	3.39392	2.69936	0.000160786	10.5174	11.7539	9.85933	13.8491	14.2663	14.1969	No	Yes	19.7691	0	6.8289	4	3	2	2	1	2	3	3	Q8R180;A0A2I3BPM1	Q8R180	ERO1-like protein alpha
Btd	3.39343	2.83043	0.000152436	7.98201	9.66916	9.21122	12.1363	12.2717	12.6346	Yes	Yes	20.0166	0	2.898	2	1	0	1	0	1	1	1	A0A0R4J131;Q8CIF4	A0A0R4J131;Q8CIF4	Biotinidase
Hdhd2	3.39142	2	0.000472973	11.6566	11.3749	NaN	13.8359	15.0912	15.7944	No	Yes	23.5011	0	13.5	7	3	1	1	0	2	3	3	Q3UGR5	Q3UGR5	Haloacid dehalogenase-like hydrolase domain-containing protein 2
Map2k3	3.38832	3.96984	0.000127157	12.89	13.0742	12.6374	16.5371	15.7946	16.4349	No	Yes	23.4397	0	18.414	9	4	3	4	4	4	4	4	O09110;A2AGS2;P70236	O09110	Dual specificity mitogen-activated protein kinase kinase 3
Calr	3.38827	2.60739	0.000205085	18.3997	19.5128	17.567	21.8492	21.5261	22.269	No	Yes	28.9895	0	121.72	75	13	12	10	7	11	12	11	P14211	P14211	Calreticulin
Dock11	3.38786	3.45837	9.68858e-05	12.3533	12.9583	12.729	16.2128	15.4707	16.5207	No	Yes	20.5247	0	13.297	16	8	4	5	5	6	7	7	A2AF47;A2AF67;A2AF65	A2AF47;A2AF67;A2AF65	Dedicator of cytokinesis protein 11
Btf3l4	3.38746	4.70019	0.000183968	13.2922	13.0496	12.7838	16.3192	16.3588	16.61	No	Yes	25.022	0	37.838	10	5	3	2	2	4	4	4	Q9CQH7	Q9CQH7	Transcription factor BTF3 homolog 4
Sept7	3.38643	3.2307	8.42866e-05	16.124	16.8558	15.5082	19.7388	19.3025	19.606	No	Yes	26.0691	0	41.911	45	14	8	10	7	12	12	12	E9Q1G8;E9Q9F5;O55131;S4R2P6;Q9DA97	E9Q1G8;E9Q9F5;O55131	Septin-7
	3.38594	2.35853	0.000332829	10.3868	11.3341	10.5586	15.4171	13.702	13.3182	No	Yes	22.0662	0	5.7467	3	2	1	1	1	2	2	1	A0A571BEI2;Q6PIU9	A0A571BEI2;Q6PIU9	Uncharacterized protein FLJ45252 homolog
Ak2	3.38534	4.02894	0.000131209	16.8068	17.1589	16.6723	20.3323	19.8716	20.5901	No	Yes	28.0343	0	56.303	60	11	7	8	7	11	10	9	Q9WTP6;F7BP55	Q9WTP6	Adenylate kinase 2, mitochondrial;Adenylate kinase 2, mitochondrial, N-terminally processed
Hist2h2ab	3.38498	4.13306	0.000137525	14.38	14.2876	14.1269	18.0888	17.32	17.5407	No	Yes	27.4534	0.005248	1.3465	6	1	1	1	1	1	1	1	Q64522	Q64522	Histone H2A type 2-B
Zadh2	3.38413	2.55641	0.000222222	13.0287	13.4862	11.6723	16.0483	15.6268	16.6644	No	Yes	23.4487	0	13.614	6	5	3	3	1	4	4	5	Q8BGC4;A0A494BB38	Q8BGC4	Zinc-binding alcohol dehydrogenase domain-containing protein 2
Arhgef1	3.3832	4.6599	0.000179028	16.1812	15.9224	15.8966	19.3807	19.1222	19.6469	No	Yes	25.1961	0	61.003	69	23	17	14	16	23	23	23	E9PUF7;Q61210;F6ZN61;A0A0U1RPP2;A0A0U1RPN7;A0A0U1RPH2;D3YVJ9	E9PUF7;Q61210;F6ZN61	Rho guanine nucleotide exchange factor 1
Acp2	3.38271	3.37308	9.10273e-05	15.4909	14.6709	15.0281	18.0356	18.2918	19.0108	No	Yes	26.4556	0	12.213	24	6	5	4	5	5	6	6	A0A5F8MPS7;P24638;B7ZCF5;B7ZCF4	A0A5F8MPS7;P24638;B7ZCF5	Lysosomal acid phosphatase
Rps6ka1	3.38185	4.42749	0.000158192	15.4901	15.2471	15.167	18.5998	18.4266	19.0233	No	Yes	23.9213	0	32.156	44	12	8	8	8	11	8	9	P18653;F6RQA2;Q505N6;E9PWV3;F6Q8A4;G3UZI3;Q9WUT3;B1AXP0;A2CEE7;B1AXN8;E9QK39;E9PUP0;F6UG16;A2CEE6;A0A338P701;A2CEE5;B1AXN5;Q7TPS0;Q60592;A0A668KL31;A2CEE8;A0A668KMA1;E9QPR4;A0A0A6YXG1;E9PWX8;E9Q1Q1;E9QLW6;B1AST7;B1AST8;A0A1D5RM97;A0A668KLF8;E9Q1M8;E9Q4Q9;E9Q6G0;B1B0X1;E9Q6Q5;B2GVN8;Q8C0P0;Q3U214;Q9R1L5;Q811L6	P18653;F6RQA2;Q505N6;E9PWV3;F6Q8A4;G3UZI3	Ribosomal protein S6 kinase alpha-1;Ribosomal protein S6 kinase
Rel	3.38184	2.86249	0.000153771	12.3044	12.6561	11.2765	15.0031	15.3449	16.0344	No	Yes	22.7043	0	2.6617	4	3	2	3	1	2	3	3	A4QPD3;P15307	A4QPD3;P15307	Proto-oncogene c-Rel
Mpc2;Zfp142	3.37939	3.64873	0.000107775	12.4282	12.7173	12.1974	15.607	15.4886	16.3853	No	Yes	25.2689	0	3.9367	11	2	2	2	2	2	2	2	A0A0A6YY89;Q9D023;G5E869	A0A0A6YY89;Q9D023;G5E869	Mitochondrial pyruvate carrier 2
Marc2	3.3786	3.85305	0.000120275	15.3057	15.4732	15.1154	18.7089	18.2059	19.1153	No	Yes	26.7321	0	17.882	32	9	8	7	7	9	8	8	Q922Q1;E0CZH6;A0A087WPC2;D3YZZ3;Q9CW42	Q922Q1	Mitochondrial amidoxime reducing component 2
Nmt1	3.37758	5.18607	0.000224359	14.1735	14.1556	13.8851	17.5811	17.2758	17.4901	No	Yes	25.0749	0	27.519	23	7	4	6	4	7	7	7	O70310;F7APP3;A2AJH3;O70311	O70310	Glycylpeptide N-tetradecanoyltransferase 1
Eif4b	3.37755	4.2857	0.000147679	14.8383	14.7665	14.8633	18.3933	17.7665	18.4409	No	Yes	25.3721	0	29.275	20	6	4	6	4	6	4	5	Q8BGD9;B2RWE8	Q8BGD9;B2RWE8	Eukaryotic translation initiation factor 4B
Letm1	3.37712	3.5637	0.000102564	15.736	16.1794	15.8216	19.3102	18.7485	19.8096	No	Yes	24.9992	0	122.5	60	17	9	16	11	14	13	14	Q9Z2I0	Q9Z2I0	LETM1 and EF-hand domain-containing protein 1, mitochondrial
Ppib	3.37663	4.15824	0.000138067	19.0351	18.6612	18.5009	21.8405	22.0483	22.4384	No	Yes	29.9806	0	54.456	86	14	12	12	12	12	14	14	P24369	P24369	Peptidyl-prolyl cis-trans isomerase B
Gna12	3.37546	3.44997	9.49796e-05	10.4633	10.5651	9.49257	13.4344	13.4473	13.7656	No	Yes	21.3084	0.00056818	2.0387	4	2	1	2	1	2	2	2	P27600;A0A0G2JG40	P27600;A0A0G2JG40	Guanine nucleotide-binding protein subunit alpha-12
	3.37524	2.90178	0.000156358	12.7464	12.7871	12.2515	16.7911	15.1658	15.9538	No	Yes	23.2062	0	5.9433	10	3	2	2	2	3	2	2	C0HKD9;C0HKD8	C0HKD9;C0HKD8
Dut	3.37419	3.06651	0.000141689	13.089	13.7163	12.4719	16.2797	16.1143	17.0057	No	Yes	25.2048	0	58.893	20	7	5	6	3	5	6	7	Q9CQ43;Q8VCG1	Q9CQ43;Q8VCG1
Prkar2b	3.37269	3.28709	8.62069e-05	9.3294	8.54797	9.43225	12.5981	11.9426	12.8871	Yes	Yes	20.0344	0	17.407	3	1	0	1	0	1	1	1	P31324	P31324	cAMP-dependent protein kinase type II-beta regulatory subunit
Dap3	3.37226	2.56643	0.000222497	11.1775	11.0692	10.9941	14.9844	13.2281	15.1451	No	Yes	21.5548	0.00028506	2.0584	4	2	1	1	1	2	1	2	A0A0R4J1B9;G3X9M0;Q9ER88;G3UYM6;G3UWR5;G3UWJ4;G3UZC0;G3UWM7;G3UWZ6	A0A0R4J1B9;G3X9M0;Q9ER88;G3UYM6;G3UWR5;G3UWJ4;G3UZC0;G3UWM7;G3UWZ6	28S ribosomal protein S29, mitochondrial
Tpm1	3.37199	3.52878	9.96441e-05	16.1563	15.841	15.2204	18.9712	18.8512	19.5113	No	Yes	27.1303	0	51.575	40	9	5	5	4	9	9	9	G5E8R1;G5E8R0;E9Q455;S4R261	G5E8R1;G5E8R0;E9Q455
Rab21	3.37157	3.89162	0.000122164	14.4363	14.2987	14.0309	17.8191	17.1335	17.928	No	Yes	25.8286	0	33.742	20	6	5	4	4	6	5	5	P35282;A0A1W2P6Z4	P35282	Ras-related protein Rab-21
Rtn3	3.37108	2.54188	0.000270689	13.7431	14.7043	12.7815	16.9201	16.7395	17.6827	No	Yes	22.0203	0	5.7713	11	2	2	1	2	1	1	1	Q9ES97	Q9ES97	Reticulon-3
Fcrla	3.36937	2.84877	0.000152216	10.4977	10.3848	10.271	13.7916	12.8498	14.6202	Yes	Yes	22.0314	0	3.7098	1	1	0	1	0	1	1	1	Q920A9	Q920A9	Fc receptor-like A
Prkra	3.3691	2.71013	0.000159858	11.5991	10.6813	10.1018	13.9056	13.7191	14.8649	No	Yes	22.1846	0	2.4107	3	2	2	1	1	2	1	2	Q9WTX2	Q9WTX2	Interferon-inducible double-stranded RNA-dependent protein kinase activator A
Trmt112	3.36909	2.93209	0.000158954	12.5644	12.6129	12.3387	15.9882	14.9879	16.6471	No	Yes	25.2737	0	10.015	6	3	1	1	1	2	2	3	Q9DCG9;Q8VCR4	Q9DCG9;Q8VCR4	Multifunctional methyltransferase subunit TRM112-like protein
Ldha	3.36896	3.09927	0.000117843	18.6595	18.7188	17.4841	21.8104	21.2905	21.8683	No	Yes	29.4824	0	68.253	77	15	10	13	11	15	14	13	P06151;A0A1B0GSX0;A0A1B0GT41;A0A1B0GQX5;D3YZQ9;A0A1B0GSR9;A0A1B0GSL7;A0A1B0GRW9;A0A1B0GS79;A0A1B0GRC1;A0A1B0GRS2;D3YVR7;D3YZE4;P00342;A0A1B0GSR2;A0A1B0GRE9	P06151;A0A1B0GSX0;A0A1B0GT41;A0A1B0GQX5;D3YZQ9;A0A1B0GSR9;A0A1B0GSL7;A0A1B0GRW9;A0A1B0GS79	L-lactate dehydrogenase A chain;L-lactate dehydrogenase
Abcb7	3.36875	3.3463	8.88889e-05	12.677	13.3588	12.6107	16.3026	15.7137	16.7364	No	Yes	22.0967	0	11.084	7	5	2	4	2	5	5	5	Q61102	Q61102	ATP-binding cassette sub-family B member 7, mitochondrial
Rpp30	3.36869	2.84496	0.000150548	10.9347	10.2374	NaN	13.8911	13.6325	14.3405	No	Yes	20.8376	0	3.9669	6	2	2	1	0	2	2	2	O88796	O88796	Ribonuclease P protein subunit p30
Acot7	3.36813	2.26078	0.000397678	12.0067	12.9517	10.5729	15.1013	14.7669	15.7674	No	Yes	21.8865	0	5.0676	7	4	2	3	2	3	3	3	E9PYH2;Q91V12	E9PYH2;Q91V12	Cytosolic acyl coenzyme A thioester hydrolase
Ddx51	3.36784	2.51365	0.000300121	9.21676	7.43949	9.01924	12.4327	11.3997	11.9466	Yes	Yes	18.8105	0	4.225	1	1	0	0	0	1	1	1	Q6P9R1	Q6P9R1	ATP-dependent RNA helicase DDX51
Pelp1	3.36693	2.79374	0.000146296	11.4009	11.642	10.8909	15.0299	NaN	14.3265	No	Yes	21.0005	0	4.8866	3	2	2	2	2	2	0	2	Q9DBD5;Q9D4T3	Q9DBD5;Q9D4T3	Proline-, glutamic acid- and leucine-rich protein 1
Spcs2	3.36474	2.93007	0.000158396	14.6556	15.1149	13.8324	17.7693	17.4306	18.4972	No	Yes	25.0411	0	31.988	15	4	3	3	3	3	3	3	A0A140LJG6;A0A140LHR3;A0A140LJ01;A0A140LHG8;Q9CYN2;A0A140LIK0	A0A140LJG6;A0A140LHR3;A0A140LJ01;A0A140LHG8;Q9CYN2	Signal peptidase complex subunit 2
Abcf3	3.36376	3.30582	8.27423e-05	NaN	11.039	11.2543	14.5402	14.1657	14.8253	No	Yes	21.9218	0	2.8695	3	1	0	1	1	1	1	1	A0A338P6L5;Q8K268	A0A338P6L5;Q8K268	ATP-binding cassette sub-family F member 3
Vamp7	3.36137	3.31059	8.66337e-05	12.4912	12.86	11.631	15.7133	15.4446	15.9085	No	Yes	23.9519	0	7.159	11	3	2	3	1	3	3	3	P70280	P70280	Vesicle-associated membrane protein 7
Ddx55	3.36113	3.71552	0.000110236	9.21586	8.78228	8.8743	11.7889	12.4559	12.711	Yes	Yes	21.6693	0.00029044	2.2037	1	1	0	0	0	1	1	1	A0A0G2JG82;E9Q9T6;Q6ZPL9	A0A0G2JG82;E9Q9T6;Q6ZPL9	ATP-dependent RNA helicase DDX55
Nln	3.36037	4.94567	0.000196078	12.2277	12.2041	12.1072	15.5892	15.2697	15.7612	No	Yes	22.1531	0	16.612	10	4	2	2	2	4	4	3	Q91YP2;A0A286YD12;A0A286YD77	Q91YP2;A0A286YD12;A0A286YD77	Neurolysin, mitochondrial
Sf3a2	3.35993	2.43793	0.000318377	13.1354	13.9559	12.6458	17.6688	15.8533	16.2947	No	Yes	22.9502	0	8.9669	11	4	1	4	2	4	4	4	G3UVU2;D3YW09;Q62203;D3Z5A6	G3UVU2;D3YW09;Q62203;D3Z5A6	Splicing factor 3A subunit 2
Mvp	3.35949	4.06691	0.000130112	16.0965	15.9779	15.7133	19.3883	18.867	19.6109	No	Yes	25.7597	0	63.149	61	20	14	13	14	17	18	16	Q9EQK5;E9Q3X0;D3Z2N7	Q9EQK5;E9Q3X0	Major vault protein
Ttll12	3.35913	4.48857	0.00015855	12.3449	12.6401	12.2846	15.8197	15.4891	16.0381	No	Yes	22.0512	0	5.5163	6	3	3	3	2	3	3	3	Q3UDE2;F2Z423	Q3UDE2	Tubulin--tyrosine ligase-like protein 12
Hp1bp3	3.35805	4.25709	0.000141844	17.786	17.7576	17.5634	21.2612	20.6399	21.2801	No	Yes	28.3928	0	56.086	81	20	16	16	14	17	17	19	Z4YKB8;Q3TEA8;Z4YKA3;A2AM65;A2AM70;A2AM63;A2AM69;A2AM62	Z4YKB8;Q3TEA8;Z4YKA3;A2AM65	Heterochromatin protein 1-binding protein 3
Sqrdl	3.35763	3.49445	9.64187e-05	14.8049	15.0979	14.5824	18.2396	17.6181	18.7005	No	Yes	25.3467	0	31.05	29	10	5	6	5	10	9	10	Q9R112;F6ZKZ3;H3BLH2	Q9R112;F6ZKZ3;H3BLH2	Sulfide:quinone oxidoreductase, mitochondrial
Pla2g15	3.35761	3.55503	9.99286e-05	15.6286	15.9702	15.5328	18.5536	19.0334	19.6175	No	Yes	25.9307	0	83.467	42	8	5	7	6	6	8	8	Q8VEB4;A0A1D5RLZ5	Q8VEB4;A0A1D5RLZ5	Group XV phospholipase A2
Caprin1	3.35647	3.94793	0.000123457	14.7899	15.0816	14.4369	17.9801	17.8967	18.5011	No	Yes	25.8279	0	14.88	14	5	4	4	4	4	4	5	Q60865;F6YLI0	Q60865	Caprin-1
Uba6	3.35597	2.83606	0.000150333	11.7552	12.808	11.6621	15.7582	14.7031	15.8318	No	Yes	21.6263	0	16.222	8	6	2	3	2	4	2	5	D3Z061;Q8C7R4	D3Z061;Q8C7R4	Ubiquitin-like modifier-activating enzyme 6
Picalm	3.35523	4.69682	0.000175219	14.9561	14.7492	14.5888	18.2071	17.8559	18.2967	No	Yes	24.8355	0	67.375	34	11	5	5	7	10	10	9	Q7M6Y3;A0A1L1SUR7;A0A140LHG9;A0A087WSI9;Q3TWS4;E9Q9A3;E9QQ05;A0A5F8MPL3;E9QLK9;Q61548	Q7M6Y3;A0A1L1SUR7	Phosphatidylinositol-binding clathrin assembly protein
Sec23ip	3.35456	2.80437	0.000146161	11.2343	12.2256	NaN	15.0742	14.9537	15.2257	No	Yes	20.3446	0	3.4887	2	3	1	2	0	3	3	2	G3X928;Q6NZC7	G3X928;Q6NZC7	SEC23-interacting protein
Ttc7;Ttc7a	3.35431	3.23193	0.000120592	10.0741	10.4418	10.2693	13.2979	NaN	13.9342	No	Yes	19.4805	0.0002862	2.0926	1	1	1	1	1	1	0	1	D3Z0R8;Q8BGB2	D3Z0R8;Q8BGB2	Tetratricopeptide repeat protein 7A
Nxf1	3.35421	3.48122	9.51087e-05	13.1522	13.2094	12.7786	15.8726	16.3446	16.9857	No	Yes	23.2345	0	21.587	13	7	5	5	4	6	7	7	Q99JX7;V9GXW3;V9GXF3;V9GXM5	Q99JX7;V9GXW3;V9GXF3	Nuclear RNA export factor 1
Acot13	3.35318	3.66424	0.000106141	13.7159	13.6692	13.7971	17.0899	16.5367	17.6151	No	Yes	26.4113	0	10.099	11	3	2	2	2	3	3	2	Q9CQR4	Q9CQR4	Acyl-coenzyme A thioesterase 13;Acyl-coenzyme A thioesterase 13, N-terminally processed
Tomm34	3.35204	3.76775	0.000112179	15.8559	15.1221	15.1184	18.6129	18.501	19.0385	No	Yes	26.2468	0	70.97	39	14	7	11	8	12	13	14	Q9CYG7	Q9CYG7	Mitochondrial import receptor subunit TOM34
Nsrp1	3.35071	2.02655	0.000450628	NaN	9.92744	9.19974	13.6579	11.9183	13.1667	No	Yes	20.6815	0	2.7194	4	1	0	1	1	1	1	1	Q5NCR9	Q5NCR9	Nuclear speckle splicing regulatory protein 1
Cbr3	3.35015	3.14367	0.000119168	13.0602	14.3628	13.7787	17.0659	16.742	17.4442	No	Yes	24.8406	0	45.927	20	8	4	7	4	8	7	7	Q8K354;A0A338P797	Q8K354	Carbonyl reductase [NADPH] 3
Hspa5	3.34998	3.66722	0.00010598	21.4353	21.8639	21.0887	24.8278	24.4276	25.1824	No	Yes	31.4504	0	323.31	368	39	34	34	33	37	37	37	P20029	P20029	78 kDa glucose-regulated protein
Hmg20a	3.34995	3.58368	0.000100937	11.7234	11.2449	11.2166	15.3058	14.3812	14.5477	No	Yes	20.8283	0	3.5084	3	3	2	2	2	3	2	2	Q9DC33	Q9DC33	High mobility group protein 20A
Psmb7	3.34994	4.26605	0.000141271	14.2049	14.133	14.0374	17.2971	17.2258	17.9021	No	Yes	25.9216	0	7.1888	9	4	3	3	4	2	4	4	P70195	P70195	Proteasome subunit beta type-7
Psme2	3.34938	3.50388	9.62199e-05	16.7913	16.8937	16.0283	19.6836	19.7383	20.3396	No	Yes	27.4883	0	83.487	44	13	9	10	8	13	12	13	P97372;G3X9V0;E0CZ90	P97372;G3X9V0;E0CZ90	Proteasome activator complex subunit 2
Lpcat2	3.34933	2.98079	0.000161142	14.1789	14.6904	13.7842	17.8776	16.7867	18.0371	No	Yes	24.7453	0	20.302	18	7	3	4	2	7	5	7	Q8BYI6	Q8BYI6	Lysophosphatidylcholine acyltransferase 2
Fxr1	3.34618	3.36869	8.83838e-05	14.2396	14.4424	14.0964	17.1714	17.3268	18.3189	No	Yes	24.445	0	15.174	18	7	3	4	3	7	6	7	A0A0H2UH27;A0A0G2JEP0;Q61584	A0A0H2UH27;A0A0G2JEP0;Q61584	Fragile X mental retardation syndrome-related protein 1
Exosc10	3.34578	2.07843	0.000457143	NaN	11.3846	9.93207	13.5808	13.7758	14.6557	No	Yes	20.4434	0	3.9613	4	4	0	2	1	2	3	3	P56960;Q8K366;F6VYQ6	P56960;Q8K366;F6VYQ6	Exosome component 10
Anxa11	3.34464	3.44356	9.18033e-05	16.3358	16.5386	15.8713	19.7094	19.0306	20.0395	No	Yes	27.2277	0	109.35	52	16	10	11	8	14	13	15	P97384;D3Z7U0	P97384;D3Z7U0	Annexin A11;Annexin
Psmd5	3.34404	4.59482	0.000164127	14.2118	14.6305	14.6377	17.8568	17.6305	18.0249	No	Yes	24.6794	0	15.778	26	7	5	5	7	7	7	7	Q8BJY1	Q8BJY1	26S proteasome non-ATPase regulatory subunit 5
Hnrnpul1	3.34287	2.94873	0.000158158	14.8388	15.3809	14.1208	18.6512	17.5673	18.1506	No	Yes	24.6817	0	42.554	31	11	9	9	6	11	8	9	Q8VDM6	Q8VDM6	Heterogeneous nuclear ribonucleoprotein U-like protein 1
Rps26	3.34241	4.01101	0.000124555	16.4166	16.7164	15.9404	19.674	19.5106	19.9161	No	Yes	29.5106	0	8.3943	12	2	2	2	2	2	2	2	P62855	P62855	40S ribosomal protein S26
Tgoln1;Tgoln2	3.33948	1.98774	0.000584329	11.3018	10.873	8.45785	13.7976	13.2589	13.5945	Yes	Yes	21.2769	0	2.3968	3	1	0	0	0	1	1	1	Q62313;Q62314	Q62313;Q62314	Trans-Golgi network integral membrane protein 1;Trans-Golgi network integral membrane protein 2
Uap1l1	3.33933	2.6994	0.00021071	14.3843	14.9441	14.4563	17.5022	17.307	18.9936	No	Yes	25.3262	0	22.093	29	10	8	8	8	8	9	10	Q3TW96;A0A0R4J1F6;A0A0R4J085;Q3UHZ7;Q91YN5	Q3TW96	UDP-N-acetylhexosamine pyrophosphorylase-like protein 1
Nup155	3.33923	4.29424	0.000141557	12.9815	12.6744	12.4392	15.9176	15.8635	16.3316	No	Yes	22.3299	0	12.175	10	4	2	2	2	3	3	3	A0A2R8VHH1;Q99P88	A0A2R8VHH1;Q99P88	Nuclear pore complex protein Nup155
Snx1	3.33873	2.75405	0.000161218	14.2211	15.2225	13.8248	18.2904	17.1067	17.8876	No	Yes	24.7598	0	42.223	31	12	6	9	5	12	8	9	Q9WV80;Q6NZD2;D3YWH1	Q9WV80;Q6NZD2	Sorting nexin-1
Ddx23	3.33765	4.8403	0.000181582	13.8425	14.0411	13.818	17.4121	16.9609	17.3415	No	Yes	23.9038	0	12.897	25	8	4	6	5	8	7	7	D3Z0M9	D3Z0M9
Cab39	3.33718	3.41639	9.00322e-05	12.5559	12.1417	12.0791	15.2902	15.2439	16.2541	No	Yes	23.4013	0	5.6944	12	4	3	3	3	4	4	4	Q06138	Q06138	Calcium-binding protein 39
Rpl21	3.33711	3.80787	0.000112994	15.6079	15.7929	15.0463	18.7733	18.5363	19.1488	No	Yes	28.0385	0	14.014	12	5	3	4	3	5	5	5	Q9CQM8;O09167	Q9CQM8;O09167	60S ribosomal protein L21
Itgax	3.33703	3.96643	0.000122699	14.8791	15.1828	14.6145	18.0052	18.0477	18.6346	No	Yes	24.2067	0	32.628	37	10	8	8	7	9	10	10	Q9QXH4	Q9QXH4	Integrin alpha-X
Cops4	3.33686	4.14267	0.00013245	14.3792	14.8207	14.6623	17.9846	17.6038	18.2843	No	Yes	24.932	0	30.74	27	9	5	6	6	9	8	9	O88544;D3YV99;F6QTS1;D3Z1R9;D6RG47	O88544	COP9 signalosome complex subunit 4
Gsto1	3.33671	3.98363	0.000123348	16.1819	16.4207	16.1353	19.486	19.2187	20.0433	No	Yes	27.6585	0	40.994	53	10	8	8	8	10	10	10	O09131;A0A494BAB1;A0A494B9X6;A0A494BAY2;A0A494BB82;Q8K2Q2	O09131;A0A494BAB1	Glutathione S-transferase omega-1
Cdc5l	3.33664	3.23127	8.18713e-05	14.5765	14.5002	13.5016	17.8686	17.1501	17.5695	No	Yes	23.7536	0	39.972	27	15	6	8	5	13	12	13	Q6A068;A0A1W2P7S8;A0A1W2P855;A0A1W2P7Z8;A0A1W2P7H4;A0A1W2P6Q8	Q6A068;A0A1W2P7S8;A0A1W2P855;A0A1W2P7Z8;A0A1W2P7H4;A0A1W2P6Q8	Cell division cycle 5-like protein
Oxct1	3.33417	2.8967	0.000152953	15.4724	16.6308	15.6929	19.472	18.5925	19.7341	No	Yes	26.5816	0	101.2	61	14	7	12	8	12	12	12	Q9D0K2;Q3UJQ9	Q9D0K2;Q3UJQ9	Succinyl-CoA:3-ketoacid coenzyme A transferase 1, mitochondrial;Succinyl-CoA:3-ketoacid-coenzyme A transferase
Rsl1d1	3.33359	4.65304	0.000166865	12.2923	12.3336	11.875	15.5048	15.3335	15.6634	No	Yes	23.1926	0	27.301	13	5	3	4	3	5	4	4	Q8BVY0;A0A2R8VHW2	Q8BVY0	Ribosomal L1 domain-containing protein 1
Acad10;Acad12	3.33328	4.18057	0.000134228	12.1125	11.5182	11.8003	15.3262	14.8392	15.2655	No	Yes	21.3864	0	10.171	7	3	2	1	2	3	3	3	Q8K370;D3Z2B3;D3Z7X0	Q8K370;D3Z2B3;D3Z7X0	Acyl-CoA dehydrogenase family member 10
	3.33181	4.71089	0.000171359	10.3027	10.4196	9.92201	13.4874	13.4528	13.6995	No	Yes	20.693	0	3.3169	3	1	1	1	1	1	1	1	A0A0R4IZY9	A0A0R4IZY9
Hadhb	3.33144	3.51397	9.50441e-05	17.9894	18.3914	17.6444	21.1828	20.9827	21.854	No	Yes	28.6218	0	121	104	24	17	18	16	20	22	22	Q99JY0;D3YXU1	Q99JY0	Trifunctional enzyme subunit beta, mitochondrial;3-ketoacyl-CoA thiolase
Ppp2ca;Ppp2cb	3.33039	2.97958	0.000156513	12.7116	13.3267	NaN	16.3527	16.0271	16.6689	No	Yes	23.7393	0	30.272	10	3	1	1	0	3	3	3	P63330;P62715	P63330;P62715	Serine/threonine-protein phosphatase 2A catalytic subunit alpha isoform;Serine/threonine-protein phosphatase 2A catalytic subunit beta isoform
Rfc1	3.33038	3.43822	9.04977e-05	11.3907	11.0951	10.3911	14.0759	14.684	14.1081	No	Yes	20.6917	0	8.1662	7	3	2	2	2	3	3	3	A0A0N5E9G7;G3X8Z6;Q5U4B1;G3UWX1;P35601	A0A0N5E9G7;G3X8Z6;Q5U4B1;G3UWX1;P35601	Replication factor C subunit 1
Glg1	3.32857	3.88105	0.000115894	16.0643	16.3279	15.8726	19.3595	19.0328	19.8581	No	Yes	25.1457	0	110.87	81	23	13	15	12	19	22	22	F8WHM5;Q61543;F6RSH1;E9PWD8	F8WHM5;Q61543;F6RSH1	Golgi apparatus protein 1
Idh3b	3.3278	3.55347	9.73574e-05	15.3526	15.7122	15.1215	19.1265	18.174	18.8691	No	Yes	26.3055	0	31.975	25	7	4	7	3	7	6	5	Q91VA7;A0A668KL51;V9GXV0	Q91VA7;A0A668KL51	Isocitrate dehydrogenase [NAD] subunit, mitochondrial
Atp5j	3.3275	4.03467	0.000124224	17.6239	17.8696	17.3455	20.859	20.6436	21.3189	No	Yes	29.9858	0	123.69	41	6	6	6	5	6	6	6	P97450;E9QAD6	P97450;E9QAD6	ATP synthase-coupling factor 6, mitochondrial
Fth1	3.32747	3.7151	0.000106789	20.704	20.9266	20.3149	23.8524	23.6301	24.4454	No	Yes	31.5656	0	199.04	124	13	11	12	11	13	13	13	P09528;A0A494BA92;A0A494B9D4;A0A494BAP3	P09528	Ferritin heavy chain;Ferritin heavy chain, N-terminally processed
Gsr	3.32682	3.86332	0.000114754	16.6844	16.9699	16.2506	20.1658	19.6007	20.1188	No	Yes	26.8946	0	93.701	51	11	6	8	7	10	9	9	P47791	P47791	Glutathione reductase, mitochondrial
Plxnb2	3.32681	3.76532	0.000109461	13.3923	13.7148	12.9243	16.7022	16.3404	16.9694	No	Yes	21.7845	0	44.645	17	9	3	3	3	7	8	7	B2RXS4	B2RXS4	Plexin-B2
Srm	3.32672	4.27207	0.000138203	13.4637	13.2362	13.1809	16.7997	16.2215	16.8397	No	Yes	24.6588	0	6.4068	15	4	3	2	3	4	4	3	Q64674	Q64674	Spermidine synthase
Erp29	3.32651	2.93259	0.000154674	16.7419	17.1967	15.6638	19.9401	19.5446	20.0972	No	Yes	28.3863	0	64.334	45	10	8	8	7	9	8	8	P57759;F8WJI4;F8WIM7;D6RG87	P57759	Endoplasmic reticulum resident protein 29
Yipf3	3.326	3.30233	8.41852e-05	9.29366	9.18035	10.2887	12.9998	12.607	13.134	Yes	Yes	21.8174	0.0037353	1.505	1	1	0	1	0	1	1	1	F6YIY0;Q3UDR8	F6YIY0;Q3UDR8	Protein YIPF;Protein YIPF3;Protein YIPF3, N-terminally processed
Chmp4b	3.32545	4.13717	0.00012987	16.6559	16.5448	16.2377	19.9703	19.4078	20.0367	No	Yes	27.8836	0	45.907	46	8	6	6	6	8	8	8	Q9D8B3	Q9D8B3	Charged multivesicular body protein 4b
Srsf7	3.32536	3.29926	8.40336e-05	15.7081	15.6706	14.9545	18.3376	18.6281	19.3436	No	Yes	26.921	0	11.54	18	5	4	4	3	4	5	5	A0A3Q4EH04;A0A3Q4L335;A0A3Q4L393;Q8BL97	A0A3Q4EH04;A0A3Q4L335;A0A3Q4L393;Q8BL97	Serine/arginine-rich splicing factor 7
Rpl27	3.32456	2.8838	0.000151777	16.6939	17.2817	15.782	19.486	19.9293	20.316	No	Yes	29.1554	0	15.753	23	7	5	6	4	5	7	7	P61358;A2A4Q0	P61358	60S ribosomal protein L27
Gcat	3.32364	1.9544	0.000641991	8.59731	9.37084	8.00087	12.2148	10.4464	13.2788	Yes	Yes	19.554	0	7.068	3	2	0	0	0	2	1	2	O88986;E9PWY6;A0A2R8VHE4	O88986;E9PWY6;A0A2R8VHE4	2-amino-3-ketobutyrate coenzyme A ligase, mitochondrial
Ide	3.32349	3.40626	8.87762e-05	11.9262	12.3809	11.81	15.5303	14.7478	15.8095	No	Yes	21.8644	0	10.355	8	5	1	2	1	4	3	5	Q8CGB9;Q9JHR7	Q8CGB9;Q9JHR7	Insulin-degrading enzyme
Cpne3	3.32287	3.5217	9.47226e-05	14.8421	15.5931	14.786	18.0693	18.3159	18.8046	No	Yes	25.7707	0	14.87	21	7	3	6	4	6	7	7	Q8BT60;A0A0R4J0J1;Q3UYN2;Q1RLL3;Q9Z140;Q0VE82;Q9DC53;Q8JZW4	Q8BT60	Copine-3
Rabggta	3.32276	2.13844	0.000461592	8.10112	7.06562	9.76959	11.7551	11.3036	11.8458	Yes	Yes	19.2283	0	4.3825	3	1	0	0	0	1	1	1	A0A2K6EDL0;Q9JHK4	A0A2K6EDL0;Q9JHK4	Geranylgeranyl transferase type-2 subunit alpha
Prune	3.32244	3.31926	8.45921e-05	10.5447	11.6755	10.7809	14.1	14.2246	14.6439	No	Yes	21.9688	0	6.3714	3	3	1	3	2	3	3	3	Q8BIW1	Q8BIW1	Protein prune homolog
Nans	3.32181	3.95741	0.000120069	14.1044	14.6779	13.8686	17.5714	17.3469	17.698	No	Yes	25.0454	0	47.636	17	10	4	5	6	9	9	9	Q99J77	Q99J77
Smad2	3.32133	3.71824	0.000106222	11.0435	11.4186	11.0128	14.6562	13.9474	14.8352	No	Yes	23.6148	0	10.29	6	3	2	2	2	3	2	3	E9Q5P9;E9Q3M0;Q62432;E9PXA8;F7BUP2;A2CG44;Q8BUN5;Q9JIW5	E9Q5P9;E9Q3M0;Q62432;E9PXA8	Mothers against decapentaplegic homolog;Mothers against decapentaplegic homolog 2
Tars	3.32112	2.40157	0.000332955	13.3078	11.8184	13.1658	15.2114	16.1767	16.8672	No	Yes	22.1778	0	12.386	15	6	3	3	3	4	6	6	Q9D0R2;A0A2I3BPK8	Q9D0R2	Threonine--tRNA ligase, cytoplasmic
Rad21	3.32053	4.23038	0.000135528	13.1479	13.2088	13.2852	16.9666	16.2559	16.381	No	Yes	23.7802	0	15.002	14	5	2	3	3	5	5	4	Q61550	Q61550	Double-strand-break repair protein rad21 homolog
Vwa8	3.31835	2.4297	0.000337294	12.0224	11.291	11.8629	15.0624	13.9539	16.1151	No	Yes	19.8343	0	3.7647	4	3	3	2	3	3	2	3	Q8CC88	Q8CC88	von Willebrand factor A domain-containing protein 8
Rbm7	3.31807	3.54219	9.55631e-05	10.9899	9.94611	10.1673	13.5466	13.6258	13.8851	No	Yes	21.475	0	11.961	4	2	2	1	1	2	2	2	A0A1L1SRC3;Q9CQT2	A0A1L1SRC3;Q9CQT2	RNA-binding protein 7
Acsf3	3.3175	3.40995	8.85515e-05	10.3968	10.8771	10.2396	13.7054	13.3604	14.4002	No	Yes	20.9057	0	3.691	2	2	1	1	1	2	1	1	A0A1D5RMC8;Q3URE1	A0A1D5RMC8;Q3URE1	Acyl-CoA synthetase family member 3, mitochondrial
Hspa4	3.31717	3.65247	0.000102041	16.8534	17.4937	16.7208	20.364	19.9791	20.6763	No	Yes	26.5459	0	135.62	95	27	14	22	18	25	24	23	Q3U2G2;Q61316	Q3U2G2;Q61316	Heat shock 70 kDa protein 4
Smc3	3.31699	3.47465	9.1623e-05	16.2142	16.8586	15.8426	19.5731	19.3375	19.9558	No	Yes	25.3691	0	152.21	88	33	17	27	19	31	30	31	Q9CW03	Q9CW03	Structural maintenance of chromosomes protein 3
Pitrm1	3.31676	3.68661	0.000104322	15.4722	15.6352	14.9711	18.7205	18.2544	19.0539	No	Yes	24.0353	0	85.857	57	17	10	13	10	17	15	16	Q8K411	Q8K411	Presequence protease, mitochondrial
Os9	3.316	2.9993	0.000159838	11.1561	11.0178	11.0543	13.6261	14.3316	15.2184	No	Yes	21.6014	0	5.9198	3	3	1	1	1	1	2	3	Q8K2C7	Q8K2C7	Protein OS-9
Akr1b7	3.31582	4.03001	0.000123566	14.8189	14.9479	14.6207	17.9408	17.8251	18.5691	No	Yes	25.842	0	14.928	25	9	4	6	5	5	9	9	P21300	P21300	Aldose reductase-related protein 1
Nop56	3.3144	3.68285	0.000103704	17.14	17.4355	16.6677	20.4014	20.0293	20.7557	No	Yes	27.221	0	124.22	98	22	15	16	17	22	20	20	Q9D6Z1;E0CXZ0;F7CHQ7;A2APD7;F6USW7;F7CHP9;F6U250;F6V095	Q9D6Z1	Nucleolar protein 56
Marcks	3.31407	3.48862	9.19238e-05	17.9471	18.015	17.4228	21.184	20.5758	21.5673	No	Yes	28.8824	0	123.79	74	12	8	9	9	12	9	11	P26645	P26645	Myristoylated alanine-rich C-kinase substrate
Hnrnpd	3.31389	4.08842	0.000125899	17.7168	17.8398	17.4286	20.7107	20.8295	21.3867	No	Yes	29.0908	0	76.554	55	9	7	9	7	9	8	9	Q60668;F6ZV59;G5E8G0;G3X9W0;E9Q5B6;F6SHF3;Q9D3U4	Q60668;F6ZV59;G5E8G0;G3X9W0;E9Q5B6	Heterogeneous nuclear ribonucleoprotein D0
Eml2	3.31386	3.69071	0.000104089	12.1263	11.9177	11.6028	15.2733	14.7044	15.6106	No	Yes	21.3131	0	4.1694	5	2	1	1	1	2	2	2	E9QK48;Q7TNG5;A0A0U1RPM7;A0A0U1RQ42;D6RGM3	E9QK48;Q7TNG5;A0A0U1RPM7;A0A0U1RQ42;D6RGM3	Echinoderm microtubule-associated protein-like 2
Stoml2	3.31369	3.57132	9.72222e-05	15.7577	16.0751	15.32	19.1096	18.5759	19.4084	No	Yes	26.7279	0	75.507	57	9	8	9	7	9	9	9	Q99JB2;A2AG39;F6WI02;A2AG41	Q99JB2;A2AG39;F6WI02	Stomatin-like protein 2, mitochondrial
Phgdh	3.3135	4.57789	0.000155039	15.9282	15.9068	15.6107	19.1976	18.842	19.3467	No	Yes	26.6057	0	69.213	47	13	9	10	8	11	10	12	Q61753;F6ZSB7	Q61753	D-3-phosphoglycerate dehydrogenase
Naca	3.31288	3.89675	0.000115321	16.6863	17.2202	16.3673	19.8608	20.1807	20.1709	No	Yes	29.3069	0	59.212	36	5	5	4	5	5	5	5	Q60817;P70670	Q60817;P70670	Nascent polypeptide-associated complex subunit alpha;Nascent polypeptide-associated complex subunit alpha, muscle-specific form
Tpi1	3.31182	3.63586	0.000100503	17.7668	17.6893	17.1871	21.0106	20.358	21.21	No	Yes	28.7014	0	77.624	57	10	9	10	7	10	10	10	P17751;H7BXC3	P17751;H7BXC3	Triosephosphate isomerase
Mbd3	3.30907	3.8041	0.000110063	11.5549	11.455	10.8329	14.4989	14.3453	14.9258	No	Yes	20.7206	0	6.7516	5	2	2	2	2	2	2	2	F6WZH1;D3YTR5;D3YTR4;Q9Z2D8	F6WZH1;D3YTR5;D3YTR4;Q9Z2D8	Methyl-CpG-binding domain protein 3
	3.30901	2.63893	0.00022547	12.8704	13.3733	11.7223	15.8629	15.4892	16.541	No	Yes	24.9704	0	67.777	10	1	1	1	1	1	1	1	A0A1W2P6G5	A0A1W2P6G5
Gm15800	3.30819	3.97057	0.00011925	12.8475	12.7631	12.7394	16.1024	15.6425	16.5297	No	Yes	22.684	0.006741	1.2597	1	1	1	1	1	1	1	1	Q6GQX8;E9Q2E4	Q6GQX8;E9Q2E4
Fam210b	3.30723	3.83209	0.000111376	11.9277	12.1352	11.4601	14.7595	15.3917	15.2935	No	Yes	24.7813	0	2.7434	3	1	1	1	1	1	1	1	Q9D8B6	Q9D8B6	Protein FAM210B
Map2k1	3.3065	3.65409	0.000101156	15.1628	15.3951	14.5535	18.3265	18.0341	18.6703	No	Yes	25.4527	0	57.772	41	9	8	9	5	7	7	8	P31938	P31938	Dual specificity mitogen-activated protein kinase kinase 1
Rps8	3.30378	3.72151	0.000105026	17.8993	18.3127	17.4776	20.979	21.0733	21.5486	No	Yes	29.9555	0	41.663	52	11	10	11	10	11	11	11	P62242	P62242	40S ribosomal protein S8
Nutf2	3.30367	3.36399	8.54179e-05	13.4965	14.5464	14.4488	17.778	17.2848	17.3398	No	Yes	26.6048	0	6.9751	5	3	1	3	2	2	2	2	P61971	P61971	Nuclear transport factor 2
Fdxr	3.3034	3.75733	0.00010687	14.8232	15.0236	14.5914	18.1124	17.6601	18.5759	No	Yes	24.5743	0	37.527	42	12	8	7	7	8	9	9	Q61578	Q61578	NADPH:adrenodoxin oxidoreductase, mitochondrial
Coq3	3.30267	3.36316	8.52619e-05	11.2464	10.9232	10.5554	14.2021	13.6769	14.754	No	Yes	22.3726	0	8.5052	2	1	1	1	1	1	1	1	Q8BMS4	Q8BMS4	Ubiquinone biosynthesis O-methyltransferase, mitochondrial
Aip	3.30259	4.67624	0.00016092	14.3565	13.9998	13.8798	17.3035	17.2736	17.5667	No	Yes	24.8639	0	12.906	17	6	5	4	4	6	6	6	O08915;D3YW40	O08915;D3YW40	AH receptor-interacting protein
Lcp1	3.30252	3.75993	0.000106952	21.0374	21.4182	20.7968	24.4013	23.9828	24.7758	No	Yes	30.9424	0	323.31	316	39	33	33	32	37	38	38	Q61233;D3YZ25;D3YVW8;D3Z7D9;D3Z311;A0A1C7CYV0;B1AX58;Q99K51	Q61233	Plastin-2
Rps7	3.3024	3.84706	0.000111643	17.9455	17.6817	17.0725	20.7795	20.7586	21.0689	No	Yes	29.3406	0	94.545	78	8	7	8	8	8	8	8	P62082	P62082	40S ribosomal protein S7
Chtop	3.30117	2.36255	0.000407435	14.2012	14.1378	13.952	18.6972	16.3752	17.1222	No	Yes	26.0207	0	24.499	15	4	3	4	3	4	3	3	E9PW20;Q9CY57;D3YZA1;D3Z7T7	E9PW20;Q9CY57;D3YZA1;D3Z7T7	Chromatin target of PRMT1 protein
Ufd1l	3.30091	3.66782	0.000101523	11.8596	11.7101	10.9141	14.6823	14.7229	14.9814	No	Yes	23.144	0	3.7285	4	2	2	2	1	2	2	2	P70362;F6SYJ2	P70362;F6SYJ2	Ubiquitin fusion degradation protein 1 homolog
Psmd4	3.30008	3.73436	0.000105263	14.5928	15.1458	14.376	17.8246	17.8105	18.3798	No	Yes	25.0071	0	40.812	18	5	4	5	4	5	5	5	O35226	O35226	26S proteasome non-ATPase regulatory subunit 4
Aars	3.29991	4.01253	0.000121212	14.0105	13.9405	13.7349	17.2338	16.7662	17.5856	No	Yes	23.5659	0	39.275	34	10	5	6	4	9	9	9	Q8BGQ7	Q8BGQ7	Alanine--tRNA ligase, cytoplasmic
Iars	3.29954	3.81947	0.000109976	12.5407	12.7093	12.4891	15.4092	15.8718	16.3567	No	Yes	21.0543	0	7.3073	9	4	2	3	2	3	4	4	Q8BU30	Q8BU30	Isoleucine--tRNA ligase, cytoplasmic
Ncl	3.29944	4.89046	0.000176322	19.3946	19.5185	19.1099	22.6679	22.473	22.7804	No	Yes	29.3442	0	211.66	147	27	22	22	21	25	27	26	P09405;A0A087WRM5	P09405	Nucleolin
Cox5b	3.29755	4.3327	0.000137255	17.3132	17.4463	17.4941	20.6638	20.3958	21.0867	No	Yes	29.5463	0	21.385	39	7	5	4	4	7	7	7	Q9D881;P19536;F7C106;A0A0A6YVR0	Q9D881;P19536	Cytochrome c oxidase subunit 5B, mitochondrial
Cmc1	3.2974	2.77218	0.000159716	11.3793	12.3906	11.7069	14.7267	14.6458	15.9966	No	Yes	25.3736	0	7.4892	3	3	1	3	2	2	2	3	Q9CPZ8	Q9CPZ8	COX assembly mitochondrial protein homolog
Slc9a3r1	3.29535	3.48995	9.05563e-05	16.6309	16.7024	16.0153	19.85	19.2457	20.139	No	Yes	26.8954	0	42.278	43	13	8	10	7	10	13	13	P70441	P70441	Na(+)/H(+) exchange regulatory cofactor NHE-RF1
Mrps9	3.29436	3.09418	0.000161637	9.65012	9.90943	NaN	13.1306	12.6686	13.4231	No	Yes	20.4856	0	3.0986	3	1	1	1	0	1	1	1	Q9D7N3	Q9D7N3	28S ribosomal protein S9, mitochondrial
Tardbp	3.29367	3.73512	0.000104869	16.1735	16.4986	15.7894	19.725	19.0296	19.5879	No	Yes	27.615	0	96.118	52	12	7	8	7	9	12	11	Q921F2;Q6VYI4;Q6VYI5;Q8BLD4;Q8R0B4;A0A087WRZ5;A0A087WR97;A0A087WQA5;A0A087WSH7;H3BJV1;A0A087WRP4;A0A087WSE4;A0A087WS74;A0A087WNY6;A0A087WQX8;A0A087WS17;A0A087WP57;A0A087WSC6	Q921F2;Q6VYI4;Q6VYI5;Q8BLD4;Q8R0B4;A0A087WRZ5;A0A087WR97;A0A087WQA5;A0A087WSH7;H3BJV1;A0A087WRP4	TAR DNA-binding protein 43
Mecp2	3.29338	4.48487	0.000146597	16.0501	15.743	15.7316	19.4366	18.8958	19.0725	No	Yes	26.2095	0	102.93	45	16	12	14	13	14	12	13	Q9Z2D6	Q9Z2D6	Methyl-CpG-binding protein 2
Sypl;Sypl1	3.29336	3.66318	0.000100287	13.827	14.2736	13.5944	17.5012	16.7305	17.3434	No	Yes	26.7326	0	2.2856	6	1	1	1	1	1	1	1	D6RFU9;O09117	D6RFU9;O09117	Synaptophysin-like protein 1
Cma1	3.29262	1.84821	0.000779021	10.7159	8.14476	9.60314	12.3551	11.9508	14.0357	Yes	Yes	21.5017	0	5.1771	1	1	0	0	0	1	1	1	A4QPC5;P21844	A4QPC5;P21844	Chymase
Vapa	3.29225	4.02134	0.00012069	15.693	15.5912	15.3154	18.8026	18.452	19.2217	No	Yes	26.2384	0	56.263	42	11	5	5	5	11	9	9	Q9WV55;A0A3B2W837	Q9WV55;A0A3B2W837	Vesicle-associated membrane protein-associated protein A
Ethe1	3.29201	3.65427	9.97151e-05	15.5729	16.0905	16.2731	19.2199	18.9041	19.6885	No	Yes	26.4438	0	43.982	35	7	6	6	5	6	6	7	Q9DCM0	Q9DCM0	Persulfide dioxygenase ETHE1, mitochondrial
Tmed2	3.29198	3.47138	8.95141e-05	13.4596	13.8405	13.0498	16.6467	16.3486	17.2305	No	Yes	25.3667	0	47.688	14	3	2	3	2	3	3	3	Q9R0Q3;F6V6T4;Q8BPI2	Q9R0Q3;F6V6T4;Q8BPI2	Transmembrane emp24 domain-containing protein 2
Drg2	3.29197	3.11492	0.000167906	10.2621	11.2966	11.4546	14.0076	14.1818	14.6999	No	Yes	21.9086	0	18.606	9	2	1	2	2	2	2	2	Q9QXB9	Q9QXB9	Developmentally-regulated GTP-binding protein 2
Fam98c	3.29166	2.73255	0.000209887	8.99752	10.5235	10.5162	13.0135	13.2396	13.6591	Yes	Yes	22.2382	0	4.0203	1	1	0	0	0	1	1	1	D3Z100;F6ZXW2;E9PYD1	D3Z100;F6ZXW2;E9PYD1
Ppm1a	3.29039	1.82791	0.000775796	11.1121	11.4383	10.8597	16.283	12.9499	14.0484	No	Yes	21.8719	0	3.4707	3	2	1	1	1	2	2	1	P49443;Q9EQE2	P49443;Q9EQE2	Protein phosphatase 1A
Arhgap26	3.29021	2.36236	0.000405776	9.52845	9.63187	7.62844	12.2195	11.8453	12.5947	Yes	Yes	20.5202	0.0019058	1.6908	1	1	0	1	0	1	1	1	D3Z1X5;F6T836;E9QAQ3;Q6ZQ82	D3Z1X5;F6T836;E9QAQ3;Q6ZQ82	Rho GTPase-activating protein 26
Tsta3	3.28914	4.75362	0.000163743	13.1612	12.7254	12.7795	16.0189	16.1944	16.3203	No	Yes	24.0957	0	17.256	7	4	2	2	2	3	4	3	A0A2R8VI39;P23591;A0A2R8VHD0;A0A2R8W6P6;A0A2R8VKL9;A0A2R8W6N0	A0A2R8VI39;P23591;A0A2R8VHD0;A0A2R8W6P6;A0A2R8VKL9	GDP-L-fucose synthase
Prpf40a	3.28473	3.96526	0.000115798	14.5235	14.8797	14.1617	17.6818	17.6278	18.1093	No	Yes	24.6599	0	21.134	19	8	5	6	4	7	7	7	A0A1B0GRU8;A0A6Q6PUT5;Q9R1C7	A0A1B0GRU8;A0A6Q6PUT5;Q9R1C7	Pre-mRNA-processing factor 40 homolog A
Ptcd3	3.28435	3.08956	0.000164927	11.7167	10.7654	10.9194	14.1401	14.0623	15.0522	No	Yes	21.2923	0	17.878	4	3	1	1	1	2	3	3	Q14C51;A0A0U1RQ61	Q14C51	Pentatricopeptide repeat domain-containing protein 3, mitochondrial
Pnisr	3.28335	4.52917	0.000147835	10.2272	10.6951	10.6057	13.6595	13.6931	14.0254	No	Yes	21.5569	0.00028827	2.1577	2	1	1	1	1	1	1	1	A2AJT5;A2AJT4	A2AJT5;A2AJT4	Arginine/serine-rich protein PNISR
Atp13a1	3.28327	2.88442	0.000148706	12.7164	14.0124	12.9797	17.0217	16.0112	16.5253	No	Yes	21.9147	0	9.8813	9	6	3	5	6	6	5	5	Q9EPE9;A0A571BD32	Q9EPE9	Manganese-transporting ATPase 13A1
Slc39a7	3.28311	1.75239	0.000854369	13.4081	13.347	12.2767	14.4222	16.6999	17.759	No	Yes	22.6468	0	4.3259	4	3	2	2	2	2	2	3	Q31125	Q31125	Zinc transporter SLC39A7
Baz1b	3.28286	4.12648	0.000124004	14.3678	14.151	13.9307	17.7623	17.0812	17.4546	No	Yes	23.0439	0	25.39	23	10	7	6	5	9	9	8	Q9Z277	Q9Z277	Tyrosine-protein kinase BAZ1B
Gspt1	3.28219	4.3699	0.00013712	14.6514	14.6859	14.5606	18.1815	17.5248	18.0382	No	Yes	25.0005	0	19.828	21	11	6	7	8	10	10	8	Q8R050;Q149F3;F7CE88	Q8R050	Eukaryotic peptide chain release factor GTP-binding subunit ERF3A
Stk19	3.27924	1.60369	0.000966107	7.9446	6.97505	10.818	11.6484	11.5807	12.3463	Yes	Yes	21.1468	0	4.0867	2	1	0	0	0	1	1	1	F6SFN2;Q9JHN8	F6SFN2;Q9JHN8	Serine/threonine-protein kinase 19
Tamm41	3.27877	3.10275	0.000160651	NaN	11.9497	12.3057	15.7595	15.0491	15.4107	No	Yes	23.4209	0	11.436	6	2	0	1	1	2	2	2	G5E881;Q3TUH1;G3UYJ1;D6RGT1;G3UWL8	G5E881;Q3TUH1;G3UYJ1;D6RGT1;G3UWL8	Phosphatidate cytidylyltransferase, mitochondrial
A2mp	3.27786	2.26052	0.000430943	11.2106	11.5697	NaN	NaN	14.9641	14.3719	No	Yes	20.2153	0.00028944	2.1851	1	1	1	1	0	0	1	1	Q6GQT1	Q6GQT1	Alpha-2-macroglobulin-P
Hibadh	3.2769	3.28176	8.06916e-05	14.0811	14.3589	14.071	17.5331	16.7621	18.0466	No	Yes	25.583	0	41.664	24	9	4	5	3	8	7	9	Q99L13	Q99L13	3-hydroxyisobutyrate dehydrogenase, mitochondrial
Mtx1	3.27681	1.73263	0.00087	10.8072	12.5293	NaN	14.0771	14.9397	15.8184	No	Yes	23.0867	0	2.4529	4	2	1	2	0	1	2	2	Q8R5C0;D3Z3F4;A0A6I8MWZ8;P47802;G3UYJ5;G3XA75;G3UXX9;D3YVW0;G3XA66	Q8R5C0;D3Z3F4;A0A6I8MWZ8;P47802;G3UYJ5;G3XA75;G3UXX9;D3YVW0;G3XA66	Metaxin-1
Flii	3.27625	3.49584	8.95713e-05	14.7991	14.5161	13.896	17.871	17.2631	17.9058	No	Yes	23.573	0	67	37	15	10	11	9	13	13	13	Q9JJ28	Q9JJ28	Protein flightless-1 homolog
Hnrnpk	3.27608	3.30073	8.15851e-05	19.1193	19.542	18.3522	22.364	21.9831	22.4947	No	Yes	29.2121	0	204.48	144	25	19	22	18	24	25	25	P61979;H3BLL4;H3BK96;A0A286YDM3;A0A286YCM2;A0A286YEC4;A0A286YDH1;A0A286YE41;H3BJ43	P61979;H3BLL4;H3BK96;A0A286YDM3	Heterogeneous nuclear ribonucleoprotein K
Stmn2	3.2751	3.4039	8.54701e-05	14.5184	14.4553	14.236	18.3596	17.2213	17.454	No	Yes	26.5079	0	2.9059	6	1	1	1	1	1	1	1	P55821	P55821	Stathmin-2
Ywhaq	3.27505	3.11493	0.000166141	16.4658	16.9066	15.6725	19.6984	19.2008	19.9708	No	Yes	27.5956	0	104.17	44	11	7	8	9	11	11	11	P68254	P68254	14-3-3 protein theta
Smarcc1	3.27497	3.6714	9.92908e-05	10.8687	11.0935	10.482	14.5833	13.8177	13.8681	No	Yes	20.6452	0.0057411	1.303	1	2	1	1	1	2	1	1	P97496;Q3UNN4;Q3UZD0	P97496;Q3UNN4	SWI/SNF complex subunit SMARCC1
Ddx49	3.27468	4.01863	0.000117647	13.9684	14.0018	13.5196	16.9579	16.8671	17.4888	No	Yes	24.5625	0.0057546	1.3199	4	1	1	1	1	1	1	1	Q4FZF3	Q4FZF3	Probable ATP-dependent RNA helicase DDX49
Gart	3.27426	4.45375	0.000140845	15.123	15.1131	14.6473	18.3144	18.0147	18.3771	No	Yes	23.9631	0	56.066	37	18	11	13	10	18	18	15	Q64737;D6RCG1;A0A338P6X4;A0A338P676;A0A338P6T2	Q64737	Trifunctional purine biosynthetic protein adenosine-3;Phosphoribosylamine--glycine ligase;Phosphoribosylformylglycinamidine cyclo-ligase;Phosphoribosylglycinamide formyltransferase
Cpt2	3.27307	3.43347	8.66873e-05	14.9679	15.4728	14.5881	18.367	17.8312	18.6499	No	Yes	24.1071	0	34.632	29	11	6	8	5	9	8	11	P52825;A2A8E7;A2A8E8;A2A8E9	P52825	Carnitine O-palmitoyltransferase 2, mitochondrial
Idh3g	3.27174	1.90158	0.000710824	14.0283	14.4991	11.5574	16.6397	16.2598	17.0006	No	Yes	23.4896	0	48.084	14	6	3	3	2	5	5	6	P70404	P70404	Isocitrate dehydrogenase [NAD] subunit gamma 1, mitochondrial
Rps27	3.27163	3.34825	8.32838e-05	16.0228	16.42	15.9443	19.0942	20.0771	19.0307	No	Yes	29.2361	0	26.14	27	5	4	4	3	4	5	4	A0A0G2JDW7;Q6ZWU9;A0A0G2JG29;A0A0G2JEX7	A0A0G2JDW7;Q6ZWU9;A0A0G2JG29	40S ribosomal protein S27
Smarce1	3.27141	3.23398	0.000118901	13.6044	14.4151	13.5781	16.8783	16.8277	17.7059	No	Yes	24.2529	0	26.264	16	7	2	4	3	6	6	7	O54941	O54941	SWI/SNF-related matrix-associated actin-dependent regulator of chromatin subfamily E member 1
Mtap	3.2714	3.47599	8.84956e-05	14.7262	14.4498	13.784	17.3908	17.3977	17.9857	No	Yes	24.9666	0	35.284	14	4	3	3	3	3	4	4	Q9CQ65	Q9CQ65	S-methyl-5-thioadenosine phosphorylase
Scarb2	3.27102	3.58321	9.35829e-05	16.1324	16.3148	15.6791	19.0031	19.108	19.8284	No	Yes	26.0058	0	52.998	42	8	7	5	6	6	6	6	O35114	O35114	Lysosome membrane protein 2
Exosc6	3.26957	4.03283	0.000117746	13.3269	13.0301	12.7444	16.4027	15.9547	16.5528	No	Yes	25.1149	0	10.294	7	3	3	3	2	3	3	3	Q8BTW3	Q8BTW3	Exosome complex component MTR3
Nsf	3.2688	3.63914	9.69529e-05	16.6202	17.1142	16.2402	19.7487	19.7461	20.2861	No	Yes	26.127	0	85.091	72	26	19	20	14	19	23	24	P46460;G3UX86;G3UX98	P46460	Vesicle-fusing ATPase
Sf3a3	3.26836	3.8401	0.000107858	15.0056	15.4579	14.7545	18.3613	18.0141	18.6476	No	Yes	25.0811	0	46.551	35	11	6	7	4	9	10	10	Q9D554	Q9D554	Splicing factor 3A subunit 3
Osbpl8	3.26713	3.60506	9.43396e-05	13.071	12.4444	12.1535	15.6363	15.6839	16.15	No	Yes	22.2878	0	19.076	11	4	2	3	2	4	4	4	B9EJ86;A0A0R4J150;A0A5F8MPC5	B9EJ86;A0A0R4J150;A0A5F8MPC5	Oxysterol-binding protein
Rock1	3.26698	3.90182	0.000111199	13.4211	13.5945	13.6027	16.6606	16.4491	17.3095	No	Yes	22.6246	0	10.22	17	8	5	5	5	7	6	6	A0A3Q4EGR2;P70335	A0A3Q4EGR2;P70335	Rho-associated protein kinase 1
Utp20	3.26643	5.50994	0.000209581	8.36244	8.06167	8.18395	11.5715	11.3748	11.461	No	Yes	16.5121	0.0011041	1.8144	3	1	1	1	1	1	1	1	E9QK83;Q5XG71	E9QK83;Q5XG71	Small subunit processome component 20 homolog
Rassf5	3.26595	3.37409	8.38826e-05	10.6405	10.8807	9.75463	13.7843	13.452	13.8374	No	Yes	21.5053	0	5.5365	4	2	2	2	1	2	2	2	A0A1D5RM65;Q5EBH1;D3Z6G2	A0A1D5RM65;Q5EBH1;D3Z6G2	Ras association domain-containing protein 5
Pitpna	3.26555	3.22372	0.000117974	14.6497	15.1615	14.0014	17.9664	17.4628	18.18	No	Yes	23.3471	0	39.158	19	4	2	3	2	4	3	4	P53810;J3QQ30;J3QPW1;F8WGG5	P53810;J3QQ30;J3QPW1;F8WGG5	Phosphatidylinositol transfer protein alpha isoform
Rpl24	3.2649	4.07329	0.000119966	16.0076	16.4949	15.9551	19.3756	19.1505	19.7262	No	Yes	28.5633	0	10.297	24	4	3	4	4	4	4	4	Q8BP67	Q8BP67	60S ribosomal protein L24
Vdac2	3.2633	4.0305	0.000117253	18.2583	18.2	17.968	21.3645	21.0301	21.8216	No	Yes	29.2322	0	109.62	65	12	10	12	10	12	12	12	Q60930;G3UX26;A0A286YCR8;D3YZT5;D3YUN8	Q60930;G3UX26;A0A286YCR8;D3YZT5	Voltage-dependent anion-selective channel protein 2
Mki67	3.26261	3.60887	9.41493e-05	15.8212	16.1171	15.9055	19.4108	19.6053	18.6156	No	Yes	23.9047	0	93.643	71	35	20	21	23	31	30	22	E9PVX6;A0A1B0GQV9	E9PVX6
Sec31a	3.26196	5.15416	0.000185185	14.6831	14.666	14.7763	17.8522	17.8424	18.2167	No	Yes	23.469	0	24.843	25	9	7	7	8	8	8	8	Q3UPL0;S4R2A9;S4R1T5;S4R256	Q3UPL0;S4R2A9;S4R1T5;S4R256	Protein transport protein Sec31A
[truncated: 1,805 more rows]

## Sheet: ShinyGO
A630001G21Rik
H3c1
Nup205
Hmgn2
Myl1
H3f3c
Igkv6-13
Ighg2b
Ighv1-77
Gpnmb
Ndufb8
Borcs7
Mocs3
Rrp1
Rnaseh2b
Vkorc1
4932415D10Rik
Gimap8
Cox20
Ighg2c
Igkv2-137
Ythdf3
Wdr5
Pepd
Nup133
Hexim1
Kat7
Supt6h
Stx4
Abcf2
Rin3
Rap1a
Adcy10
Tlr7
[truncated: 353 more rows]

## Sheet: DAVID
A630001G21Rik
[truncated: 386 more rows]
