# Supplementary material for: Impaired iron recycling from erythrocytes is an early hallmark of aging
Source: eLife. 2023 Jan 31;12:e79196. doi: 10.7554/eLife.79196 (PMC9931393; doi:10.7554/eLife.79196)
Supplement: Figure 3—source data 2. [file elife-79196-fig3-data2.xlsx]

## Sheet: KMS_extra_sample_Protein_Table
Figure 3 - Source Data 2 Related to Figure 3 D
RPM proteome used for the Venn diagram (all possible detected proteins)
Gene names	Log2 iBAQ	Razor + unique peptides	Q-value	Score	Log2 Intensity	MS/MS count	Protein IDs	Majority protein IDs	Protein names
Hbbt1;Hbb-b1;Hbb-bs	31.6252	22	0	240.95	35.5346	286	A8DUK4;P02088;E9Q223;CON__Q3SX09;CON__P02070;P02104	A8DUK4;P02088;E9Q223	Hemoglobin subunit beta-1
Actg1	31.1547	33	0	323.31	36.3552	698	P63260;B1ATY1;G3UYG0	P63260	Actin, cytoplasmic 2;Actin, cytoplasmic 2, N-terminally processed
Hist2h2ac;Hist2h2aa1	30.9396	7	0	79.164	33.4764	40	Q64523;Q6GSS7	Q64523;Q6GSS7	Histone H2A type 2-C;Histone H2A type 2-A
Hist1h4a	30.7363	12	0	45.467	33.5592	96	P62806	P62806	Histone H4
Hist1h2bc;Hist2h2bb;Hist1h2bh;Hist1h2bm	30.409	8	0	39.551	33.2527	89	Q6ZWY9;Q64525;Q64478;P10854	Q6ZWY9;Q64525;Q64478;P10854	Histone H2B type 1-C/E/G;Histone H2B type 2-B;Histone H2B type 1-H;Histone H2B type 1-M
haemaglobin alpha 2;Hba	30.2793	13	0	260.16	35.121	152	Q91VB8;P01942;A7M7S6;P06467	Q91VB8;P01942	Hemoglobin subunit alpha
Hist1h1c	29.3766	16	0	47.069	32.8838	26	P15864;I7HFT9;Q07133	P15864	Histone H1.2
Pf4	29.2195	3	0	11.921	31.7268	23	Q9Z126;A0A0J9YTR7	Q9Z126;A0A0J9YTR7	Platelet factor 4
Ppia	28.9371	12	0	119.22	33.0252	81	P17742;A0A1L1SST0;V9GXC1;V9GX31;A0A1L1SRX5	P17742;A0A1L1SST0	Peptidyl-prolyl cis-trans isomerase A;Peptidyl-prolyl cis-trans isomerase A, N-terminally processed
Gapdh	28.6641	24	0	175.25	33.3706	131	P16858;A0A0A0MQF6;A0A1D5RLD8;S4R257;S4R1W8;S4R1N5;V9GX06;A0A0R4J0X7;S4R2G5;Q64467;V9GXA7;V9GXK0	P16858;A0A0A0MQF6;A0A1D5RLD8;S4R257	Glyceraldehyde-3-phosphate dehydrogenase
Tuba1b	28.5294	28	0	323.31	33.8101	166	P05213;A0A2R8VHF3	P05213;A0A2R8VHF3	Tubulin alpha-1B chain
Cfl1	28.529	18	0	174.54	32.8315	66	P18760;F8WGL3;A0A494B9A7	P18760;F8WGL3;A0A494B9A7	Cofilin-1
Hist1h3b;H3f3a	28.5058	4	0	78.825	31.1315	28	P84228;A0A1W2P768;F8WI35	P84228;A0A1W2P768;F8WI35	Histone H3.2;Histone H3
Ywhaz	28.451	18	0	301.95	32.8818	102	P63101;A0A2I3BQ03;D3YXN6;D3YXF4;D3YW45	P63101;A0A2I3BQ03	14-3-3 protein zeta/delta
Tubb4b	28.3194	29	0	323.31	33.6747	130	P68372;G3UZR1	P68372	Tubulin beta-4B chain
Rap1a	28.1705	16	0	89.939	32.0335	59	P62835;A0A0G2JE52;A0A0G2JED9	P62835;A0A0G2JE52;A0A0G2JED9	Ras-related protein Rap-1A
Lcp1	28.1524	50	0	323.31	34.0126	178	Q61233;D3YZ25;D3YVW8;D3Z7D9;D3Z311	Q61233	Plastin-2
Myl9	28.106	13	0	87.631	31.6537	47	Q9CQ19	Q9CQ19	Myosin regulatory light polypeptide 9
Eef1a1	27.9835	24	0	163.58	33.3073	120	P10126;D3YZ68;D3Z3I8;P62631	P10126;D3YZ68;D3Z3I8	Elongation factor 1-alpha 1
Coro1a	27.9042	25	0	143.07	32.7895	103	O89053;G3UYK8;A0A0U1RPY8;D3YW57;G3UX53;D3YXM2	O89053;G3UYK8	Coronin-1A;Coronin
Mdh2	27.8482	19	0	126.36	32.6123	53	P08249;A0A0G2JF23;A0A0G2JGY4	P08249	Malate dehydrogenase, mitochondrial
Hspe1;Cpn10-rs1	27.803	8	0	21.388	31.0643	21	Q64433;Q9JI95	Q64433;Q9JI95	10 kDa heat shock protein, mitochondrial
Tubb1	27.7737	24	0	323.31	33.0167	116	A2AQ07;CON__ENSEMBL:ENSBTAP00000025008	A2AQ07	Tubulin beta-1 chain
Tpm4	27.7698	31	0	323.31	32.6916	85	Q6IRU2;A0A571BEU1	Q6IRU2	Tropomyosin alpha-4 chain
Ldha	27.6998	28	0	245.39	32.434	86	P06151;A0A1B0GSX0;A0A1B0GSR9;D3YZQ9;A0A1B0GT41;A0A1B0GQX5;A0A1B0GSL7;A0A1B0GRW9;A0A1B0GS79;A0A1B0GRC1;A0A1B0GRS2;P00342;D3YVR7;D3YZE4;A0A1B0GRE9;A0A6I8MX27;D3Z7F0;A0A0N4SVV8;A0A1B0GSR2;P16125	P06151;A0A1B0GSX0;A0A1B0GSR9;D3YZQ9;A0A1B0GT41;A0A1B0GQX5;A0A1B0GSL7	L-lactate dehydrogenase A chain;L-lactate dehydrogenase
Hspa8	27.6825	38	0	302.59	33.778	135	P63017;Q504P4;D3Z5E2;P16627	P63017;Q504P4	Heat shock cognate 71 kDa protein
Hist1h1b	27.5498	10	0	34.015	31.0041	14	P43276	P43276	Histone H1.5
Cd47	27.5125	4	0	27.992	31.146	10	A0A2R8W6P0;D3Z187;A0A2R8VI94;A0A2R8VI30;A0A2R8VK70;Q61735;A0A2R8VJU9	A0A2R8W6P0;D3Z187;A0A2R8VI94;A0A2R8VI30;A0A2R8VK70;Q61735	Leukocyte surface antigen CD47
Thbs1	27.4914	73	0	323.31	34.5582	250	Q80YQ1;P35441;CON__Q28194;E9PWF0;Q05895;Q03350	Q80YQ1;P35441	Thrombospondin-1
Ppbp	27.489	6	0	50.252	30.6637	16	Q9EQI5	Q9EQI5
Tagln2	27.4848	19	0	230.39	32.1295	86	Q9WVA4;A0A0A6YXG6;Q9R1Q8	Q9WVA4;A0A0A6YXG6	Transgelin-2
Fgb	27.465	38	0	308.89	32.8145	97	Q8K0E8;CON__P02676	Q8K0E8	Fibrinogen beta chain;Fibrinopeptide B;Fibrinogen beta chain
Cap1	27.4261	34	0	300.59	33.0902	153	P40124;B1ARS0	P40124	Adenylyl cyclase-associated protein 1
Rac1;Rac3	27.4135	10	0	37.275	31.1234	25	P63001;Q3TLP8;P60764;A2AC13	P63001;Q3TLP8;P60764;A2AC13	Ras-related C3 botulinum toxin substrate 1;Ras-related C3 botulinum toxin substrate 3
Prdx1	27.4007	20	0	86.443	32.0214	48	P35700;B1AXW5;B1AXW6;B1AXW4	P35700;B1AXW5;B1AXW6;B1AXW4	Peroxiredoxin-1
Ca2	27.3772	11	0	164.2	31.8776	25	P00920;A0A0A6YX78	P00920	Carbonic anhydrase 2
Tln1	27.3379	152	0	323.31	35.5341	536	P26039;A2AIM2;F6SX70;F6S1V7	P26039	Talin-1
Slc25a5	27.3262	23	0	84.62	31.9651	67	P51881	P51881	ADP/ATP translocase 2;ADP/ATP translocase 2, N-terminally processed
Atp5a1	27.2782	31	0	228.58	32.7453	98	Q03265;D3Z6F5;D6RJ16	Q03265;D3Z6F5	ATP synthase subunit alpha, mitochondrial;ATP synthase subunit alpha
Atp5b	27.2743	30	0	305.58	33.2131	160	P56480	P56480	ATP synthase subunit beta, mitochondrial
Pkm	27.2527	37	0	323.31	33.1281	136	P52480;A0A1L1SU37;A0A1L1SQV8;A0A1L1SSN6;A0A1L1STV8;A0A1L1SUV0;A0A1L1ST52;A0A1L1SVH2	P52480	Pyruvate kinase PKM
Tpm3	27.2511	25	0	163.99	32.3054	55	E9Q7Q3;D3Z6I8;A0A0R4J1P2;P21107	E9Q7Q3;D3Z6I8;A0A0R4J1P2;P21107	Tropomyosin alpha-3 chain
Hist1h1e	27.2491	6	0	22.414	30.5867	10	P43274	P43274	Histone H1.4
Rps27a;Gm8797;Uba52;Kxd1;Ubc;Ubb	27.1752	5	0	35.703	29.8369	18	P62983;A0A0A6YW67;E9Q9J0;E9Q4P0;E9Q5F6;E9QNP0;Q5SX22;P62984;P0CG49;P0CG50	P62983;A0A0A6YW67;E9Q9J0;E9Q4P0;E9Q5F6;E9QNP0;Q5SX22;P62984;P0CG49;P0CG50	Ubiquitin-40S ribosomal protein S27a;Ubiquitin;40S ribosomal protein S27a;Ubiquitin-60S ribosomal protein L40;Ubiquitin;60S ribosomal protein L40;Polyubiquitin-B;Ubiquitin;Polyubiquitin-C;Ubiquitin;Ubiquitin-related 1;Ubiquitin-related 2
Hspa5	27.1167	41	0	323.31	32.9456	112	P20029	P20029	78 kDa glucose-regulated protein
Rps25	27.1163	5	0	11.438	29.487	9	A0A1L1SQA8;P62852	A0A1L1SQA8;P62852	40S ribosomal protein S25
Ywhae	27.1103	23	0	131.15	31.7961	55	P62259;D6REF3;F6WA09	P62259;D6REF3	14-3-3 protein epsilon
Ftl1	27.1095	13	0	117.45	32.2377	45	Q9CPX4;A0A1B0GR60;P29391;P49945;A0A1B0GRH4;A0A1Y7VNT9	Q9CPX4;A0A1B0GR60;P29391	Ferritin;Ferritin light chain 1
Hsp90ab1	27.0967	46	0	323.31	32.8296	119	P11499;E9Q3D6;E9PX27;D3Z1R1;E9Q0C3	P11499	Heat shock protein HSP 90-beta
Aldh2	27.0842	31	0	231.64	32.29	83	P47738;A0A0G2JFQ0;A0A0G2JF60	P47738	Aldehyde dehydrogenase, mitochondrial
Pdia3	26.96	36	0	208.54	32.8939	86	P27773;F6Q404	P27773	Protein disulfide-isomerase A3
Flna	26.9308	148	0	323.31	35.1421	383	B7FAU9;Q8BTM8;B7FAV1;F6XC15;J3JS91;F6Z2C0;Q80X90;F7AVL7;A0A668KLG7	B7FAU9;Q8BTM8;B7FAV1	Filamin-A
Acta1;Actc1;Actg2;Acta2	26.9207	4	0	32.857	33.2279	49	P68134;P68033;P63268;P62737;A0A494B9T3;D3YZY0;A0A1D5RM20;D3Z2K3;A0A0U1RQ96	P68134;P68033;P63268;P62737;A0A494B9T3;D3YZY0;A0A1D5RM20;D3Z2K3	Actin, alpha skeletal muscle;Actin, alpha cardiac muscle 1;Actin, gamma-enteric smooth muscle;Actin, aortic smooth muscle
Actb;Actg1	26.9198	1	0	24.7	31.2417	18	P60710;E9Q1F2;E9Q5F4;G3UZ07;E9Q606;F8WGM8;E9Q2D1;F6WX90;V9GXQ2;E9Q3M9	P60710;E9Q1F2;E9Q5F4;G3UZ07	Actin, cytoplasmic 1;Actin, cytoplasmic 1, N-terminally processed
Rpl22	26.8772	5	0	22.083	29.3139	10	P67984	P67984	60S ribosomal protein L22
Eno1	26.8703	31	0	299.07	32.0687	123	P17182;Q6PHC1;B0QZL1;B1ARR7;B1ARR6;D3Z2S4;A0A0N4SUI6;D3YVD3;A0A0N4SUW8	P17182;Q6PHC1	Alpha-enolase
Arpc4	26.8259	7	0	43.657	30.1195	20	P59999;Q3TX55;E9PWA7	P59999;Q3TX55;E9PWA7	Actin-related protein 2/3 complex subunit 4
Fga	26.8059	31	0	323.31	32.7688	62	E9PV24;CON__P02672	E9PV24	Fibrinogen alpha chain;Fibrinopeptide A;Fibrinogen alpha chain
Atp5i;Atp5k	26.7982	4	0	17.136	28.4501	6	Q06185;Q8BTB6	Q06185;Q8BTB6	ATP synthase subunit e, mitochondrial
Arhgdia	26.7201	10	0	106.87	31.4688	30	Q99PT1	Q99PT1	Rho GDP-dissociation inhibitor 1
Atp5j2	26.6783	3	0	8.0789	28.6783	6	P56135;F8WHP8	P56135;F8WHP8	ATP synthase subunit f, mitochondrial
Hsp90b1	26.6413	50	0	311.94	32.6647	115	P08113;F7C312	P08113;F7C312	Endoplasmin
Tuba4a	26.6116	6	0	90.599	31.2391	19	A0A0A0MQA5;P68368;A0A087WQS4;A0A087WRB4;A0A087WSB0;A0A087WS35	A0A0A0MQA5;P68368	Tubulin alpha-4A chain
Fgg	26.5846	27	0	277.82	32.5336	73	Q3UER8;Q8VCM7	Q3UER8;Q8VCM7	Fibrinogen gamma chain
Prdx2	26.5559	10	0	60.679	30.5056	23	Q61171;D3Z4A4	Q61171;D3Z4A4	Peroxiredoxin-2
Fermt3	26.5557	46	0	323.31	32.737	96	Q8K1B8;A0A494B9W3;A0A494BBJ8;A0A494B9F7	Q8K1B8;A0A494B9W3;A0A494BBJ8	Fermitin family homolog 3
Hmgb2	26.5375	14	0	61.249	30.9883	32	P30681;A0A1B0GQX9	P30681	High mobility group protein B2
Actr3	26.5281	28	0	210.16	31.7235	55	Q99JY9;A0A087WRA1;A0A087WQ14;A0A087WP86;A0A087WS98;Q641P0;A0A087WQ83;A0A087WPR6	Q99JY9	Actin-related protein 3
Cnn2	26.5069	15	0	140.06	30.6514	39	Q08093;D3Z7R6;A0A0G2JDV8;Q9DAW9	Q08093;D3Z7R6	Calponin-2;Calponin
Rpl36	26.4953	4	0	11.207	28.2368	6	Q6ZWZ4;P47964	Q6ZWZ4;P47964	60S ribosomal protein L36
Arpc5	26.4316	6	0	42.465	30.3725	11	Q9CPW4;Q3UA72	Q9CPW4;Q3UA72	Actin-related protein 2/3 complex subunit 5
Rps28	26.3807	4	0	13.913	27.9907	7	G3UYV7;P62858	G3UYV7;P62858	40S ribosomal protein S28
Rab11b;Rab11a	26.3666	13	0	52.215	30.3441	23	P46638;G3UY29;E9Q3P9;F8WGS1;G3UZD3;G3UZL4;D3YYB3;Q9WTL2	P46638;G3UY29;E9Q3P9;F8WGS1;G3UZD3	Ras-related protein Rab-11B
Hist1h1a	26.3618	7	0	74.251	30.9109	15	P43275	P43275	Histone H1.1
Rpl12	26.351	6	0	82.287	30.0267	11	P35979	P35979	60S ribosomal protein L12
Ctsb	26.3467	16	0	177.58	31.4772	59	P10605	P10605	Cathepsin B;Cathepsin B light chain;Cathepsin B heavy chain
Aldoa;Aldoart1	26.3441	26	0	166.73	32.4538	80	P05064;A6ZI44;D3YWI1;Q9CPQ9;A6ZI46;D3Z510;A0A0U1RPN8;D3YV98;A0A0U1RPT5;A6ZI47;P05063;Q91Y97	P05064;A6ZI44;D3YWI1;Q9CPQ9;A6ZI46;D3Z510;A0A0U1RPN8	Fructose-bisphosphate aldolase A;Fructose-bisphosphate aldolase
Vdac1	26.3023	15	0	231.34	31.322	30	Q60932	Q60932	Voltage-dependent anion-selective channel protein 1
Rsu1	26.2864	12	0	131.89	30.6631	36	Q9D031;Q01730;A2AUR7;B1AYQ0;E0CXG5;A0A0A6YWZ2	Q9D031;Q01730;A2AUR7	Ras suppressor protein 1
Rpsa	26.2402	14	0	93.502	30.5877	31	P14206;A0A1L1SUK3;A0A1L1SRW0	P14206	40S ribosomal protein SA
Ndufa4	26.2213	5	0	12.156	28.2228	6	A0A0N4SVQ1;Q62425	A0A0N4SVQ1;Q62425	Cytochrome c oxidase subunit NDUFA4
Tubb5	26.2152	6	0	70.542	30.8502	27	P99024;A0A1D5RM76	P99024	Tubulin beta-5 chain
Gm10260;Rps18	26.2053	8	0	23.25	29.6732	12	F6YVP7;P62270;S4R1N6;A0A1Y7VKY1;A0A3Q4EGP3	F6YVP7;P62270;S4R1N6;A0A1Y7VKY1	40S ribosomal protein S18
Atp5d	26.1987	4	0	15.699	29.1289	8	Q9D3D9;D3Z7S4	Q9D3D9;D3Z7S4	ATP synthase subunit delta, mitochondrial
Ywhah	26.172	13	0	168.79	30.9012	21	P68510	P68510	14-3-3 protein eta
Rpl35	26.158	4	0	9.2785	29.3797	5	Q6ZWV7	Q6ZWV7	60S ribosomal protein L35
Hist1h2ah;H2afj;Hist1h2ak;Hist1h2af;Hist3h2a;Hist1h2aa	26.1577	2	0	18.668	29.4825	7	A0A0N4SV66;C0HKE9;C0HKE8;C0HKE7;C0HKE6;C0HKE5;C0HKE4;C0HKE3;C0HKE2;C0HKE1;Q8CGP6;Q8R1M2;Q8CGP7;Q8CGP5;Q8BFU2;Q8CGP4	A0A0N4SV66;C0HKE9;C0HKE8;C0HKE7;C0HKE6;C0HKE5;C0HKE4;C0HKE3;C0HKE2;C0HKE1;Q8CGP6;Q8R1M2;Q8CGP7;Q8CGP5;Q8BFU2;Q8CGP4	Histone H2A type 1-H;Histone H2A.J;Histone H2A type 1-K;Histone H2A type 1-F;Histone H2A type 3;Histone H2A
Treml1	26.1518	11	0	120.13	30.7453	33	Q8K558;A6XA75	Q8K558;A6XA75	Trem-like transcript 1 protein
Rap1b	26.1427	4	0	42.217	30.5527	18	Q99JI6;A0A1W2P777	Q99JI6	Ras-related protein Rap-1b
Apoe	26.1209	12	0	41.34	30.1021	16	P08226;A0A1B0GX15;G3UWN5;G3UZM8	P08226;A0A1B0GX15;G3UWN5	Apolipoprotein E
Asah1	26.1206	19	0	83.463	31.2078	56	Q9WV54;D3Z505	Q9WV54	Acid ceramidase;Acid ceramidase subunit alpha;Acid ceramidase subunit beta
Hist1h1d	26.1163	1	0	4.3583	29.4383	2	P43277	P43277	Histone H1.3
Rps3	26.1101	17	0	56.644	30.6822	28	P62908;D3YV43;A0A140LI77	P62908;D3YV43;A0A140LI77	40S ribosomal protein S3
Itgb3	26.105	35	0	273.27	31.9796	64	O54890	O54890	Integrin beta-3
Hrsp12	26.1047	7	0	58.91	29.109	10	P52760	P52760	Ribonuclease UK114
Ctsd	26.0787	15	0	100.65	31.4683	43	F8WIR1;P18242;F6Y6L6;A0A1B0GT66	F8WIR1;P18242;F6Y6L6;A0A1B0GT66	Cathepsin D
Rps15a	26.0746	7	0	23.154	29.4643	12	F8WJ41;P62245;D3Z712;D3YVB4	F8WJ41;P62245;D3Z712;D3YVB4	40S ribosomal protein S15a
Cox6c	26.0744	5	0	13.543	29.0072	17	Q9CPQ1	Q9CPQ1	Cytochrome c oxidase subunit 6C
Actr2	26.0734	17	0	149.94	30.8075	39	P61161	P61161	Actin-related protein 2
Rps13	26.0718	10	0	26.143	29.8965	15	P62301;Q921R2;A0A0U1RQ71	P62301;Q921R2	40S ribosomal protein S13
Rpl14	26.063	4	0	17.806	28.592	7	Q9CR57;A0A1L1SUF6	Q9CR57;A0A1L1SUF6	60S ribosomal protein L14
Calr	26.0422	24	0	198.38	32.4457	66	P14211	P14211	Calreticulin
Actn1	26.032	66	0	323.31	32.7301	158	Q7TPR4;A1BN54	Q7TPR4;A1BN54	Alpha-actinin-1
Hspd1	25.9994	43	0	323.31	32.3752	130	P63038;D3Z2F2;D3Z7J9	P63038	60 kDa heat shock protein, mitochondrial
Rpl27	25.9749	9	0	24.235	29.8202	17	P61358;A2A4Q0	P61358;A2A4Q0	60S ribosomal protein L27
Mif	25.9715	5	0	30.161	28.6891	13	P34884	P34884	Macrophage migration inhibitory factor
Alb	25.9711	38	0	252.89	32.2397	93	P07724	P07724	Serum albumin
Slc25a3	25.9682	17	0	76.059	30.6152	29	Q8VEM8;G5E902	Q8VEM8;G5E902	Phosphate carrier protein, mitochondrial
Rplp2	25.9613	6	0	65.415	29.5466	11	P99027;A0A5F8MPY2	P99027;A0A5F8MPY2	60S acidic ribosomal protein P2
Rpl30	25.9606	7	0	41.172	29.4326	17	P62889;A0A2I3BQF4	P62889;A0A2I3BQF4	60S ribosomal protein L30
Zyx	25.9581	26	0	155.04	31.53	49	Q62523;Q7TQE2;A0A0N4SVP4;A0A0N4SVD2;A0A0N4SUX7	Q62523;Q7TQE2	Zyxin
Itga2b	25.9546	43	0	323.31	32.467	120	Q9QUM0	Q9QUM0	Integrin alpha-IIb;Integrin alpha-IIb heavy chain;Integrin alpha-IIb light chain
Rhoa	25.9519	10	0	44.106	29.6905	24	Q9QUI0;A0A0A6YXF6;Q9CR99;A0A0A6YWJ1	Q9QUI0;A0A0A6YXF6	Transforming protein RhoA
Anxa5	25.9513	22	0	171.39	30.759	40	P48036;A0A0G2JGQ0	P48036	Annexin A5
Cox4i1	25.9208	9	0	39.09	30.2873	17	P19783;M0QWX7;D6RG40	P19783	Cytochrome c oxidase subunit 4 isoform 1, mitochondrial
Cotl1	25.9168	11	0	59.393	29.9167	33	Q9CQI6;A0A1D5RLP1	Q9CQI6	Coactosin-like protein
Rab6a;Rab6b	25.9132	6	0	14.005	29.6137	8	P35279;P61294	P35279;P61294	Ras-related protein Rab-6A;Ras-related protein Rab-6B
Rpl13	25.9027	10	0	35.004	29.4258	17	P47963	P47963	60S ribosomal protein L13
Myl6	25.8898	8	0	34.842	29.43	14	A0A1W2P6F6;A0A1W2P7Q9;Q60605;Q8CI43	A0A1W2P6F6;A0A1W2P7Q9;Q60605	Myosin light polypeptide 6
Timp3	25.8788	10	0	37.584	29.7572	20	P39876;E9QAB2	P39876	Metalloproteinase inhibitor 3
Rpl6	25.8765	14	0	63.901	29.9912	17	P47911;A0A0J9YU32	P47911	60S ribosomal protein L6
Alox12	25.8719	41	0	276.77	31.9557	89	P39655;Q8C587	P39655;Q8C587	Arachidonate 12-lipoxygenase, 12S-type
Prdx4	25.8189	10	0	35.297	30.1666	14	O08807;B1AZS9	O08807;B1AZS9	Peroxiredoxin-4
Sumo3;Sumo2	25.817	1	0	4.7603	26.817	1	G3UZX6;H7BWX9;D3Z794;G3UZ60;G3UWI9;G3UWX9;G3UZA7;P61957;Q9Z172	G3UZX6;H7BWX9;D3Z794;G3UZ60;G3UWI9;G3UWX9;G3UZA7;P61957;Q9Z172	Small ubiquitin-related modifier;Small ubiquitin-related modifier 2;Small ubiquitin-related modifier 3
Rps5	25.797	8	0	99.869	29.4326	14	D3YYM6;D3Z1S8;Q91V55;P97461	D3YYM6;D3Z1S8;Q91V55;P97461	40S ribosomal protein S5;40S ribosomal protein S5, N-terminally processed
Lyz2	25.7934	6	0	76.353	29.2422	13	P08905;P17897	P08905	Lysozyme C-2
Gpx1	25.7858	13	0	72.76	30.0917	25	P11352;A0A0A6YVV2;A0A0A6YY34	P11352;A0A0A6YVV2;A0A0A6YY34	Glutathione peroxidase 1;Glutathione peroxidase
Pdia6	25.769	15	0	122.2	30.7178	30	Q3TML0;F7DBQ0;Q922R8	Q3TML0;F7DBQ0;Q922R8	Protein disulfide-isomerase A6
Cdc42	25.7675	9	0	55.012	29.6356	20	P60766;A0A2R8VH29;G3UZM2;D3Z3L1;F2Z463;D3YX61;Q8R527;Q9ER71	P60766	Cell division control protein 42 homolog
Vdac2	25.7498	14	0	147.02	30.3579	23	Q60930;G3UX26;A0A286YCR8;D3YZT5;D3YUN8	Q60930;G3UX26;A0A286YCR8;D3YZT5	Voltage-dependent anion-selective channel protein 2
Vcl	25.7479	56	0	323.31	33.4655	153	Q64727;A0A286YDJ4	Q64727	Vinculin
Vcp	25.7468	46	0	281.09	31.9091	91	Q01853	Q01853	Transitional endoplasmic reticulum ATPase
Myl12a	25.7065	7	0	65.735	29.4724	24	Q6ZWQ9;D3YV37	Q6ZWQ9;D3YV37
Capzb	25.6805	19	0	200.29	30.8534	34	A2AMW0;F7CAZ6	A2AMW0;F7CAZ6
Ppib	25.6718	12	0	59.134	30.0444	23	P24369	P24369	Peptidyl-prolyl cis-trans isomerase B
Rpl23a	25.6712	7	0	12.448	28.375	7	P62751	P62751	60S ribosomal protein L23a
Gm20390;Nme2	25.667	16	0	91.511	31.2495	46	E9PZF0;Q01768	E9PZF0;Q01768	Nucleoside diphosphate kinase;Nucleoside diphosphate kinase B
Hnrnpa2b1	25.6589	22	0	208.21	30.7534	52	O88569;A0A0N4SUM2	O88569	Heterogeneous nuclear ribonucleoproteins A2/B1
Prdx5	25.6491	12	0	101.97	30.1765	22	P99029;G3UZJ4;H3BJQ7;A0A494BAZ4	P99029;G3UZJ4;H3BJQ7;A0A494BAZ4	Peroxiredoxin-5, mitochondrial
Hist1h3a	25.6448	1	0	28.887	28.107	21	P68433	P68433	Histone H3.1
Plek	25.6413	14	0	220.57	31.7826	52	Q9JHK5;Q8CAG6;Q5F270	Q9JHK5;Q8CAG6	Pleckstrin
Rps9	25.6407	11	0	23.7	29.6148	16	Q6ZWN5;F7CJS8;D3YWH9;Q9CXW7;D3Z673;D3YUV6	Q6ZWN5;F7CJS8;D3YWH9;Q9CXW7	40S ribosomal protein S9
Rps19	25.6353	6	0	13.026	29.1775	8	D3YUT3;D3YUG3;D3Z5R8;D3Z722;Q9CZX8;S4R223	D3YUT3;D3YUG3;D3Z5R8;D3Z722;Q9CZX8;S4R223	40S ribosomal protein S19
Eef2	25.6225	45	0	311.96	31.9438	118	P58252	P58252	Elongation factor 2
Arpc1b	25.6016	19	0	188.68	31.6557	35	Q91Z25;Q9WV32;F6VVE6;D3Z6S0;F6THG2	Q91Z25;Q9WV32	Actin-related protein 2/3 complex subunit 1B
Eif4a1	25.5912	27	0	176.28	31.0128	51	P60843;D6RJ60;D6RJ11	P60843	Eukaryotic initiation factor 4A-I
Arpc2	25.5795	25	0	126.15	30.8366	59	Q9CVB6;D3YXG6;A0A087WRT2	Q9CVB6;D3YXG6	Actin-related protein 2/3 complex subunit 2
Txn	25.57	8	0	19.367	28.9411	13	P10639	P10639	Thioredoxin
Pcbp1	25.5658	15	0	144.12	30.1517	34	P60335	P60335	Poly(rC)-binding protein 1
Ube2d2;Ube2d3	25.544	3	0	15.249	27.6319	6	A0A494BAN1;A0A0G2JE32;A0A0G2JGL0;P62838;P61079;A0A494BA56;P61080;Q6ZWY6	A0A494BAN1;A0A0G2JE32;A0A0G2JGL0;P62838;P61079;A0A494BA56	Ubiquitin-conjugating enzyme E2 D2;Ubiquitin-conjugating enzyme E2 D3
Bin2	25.5353	24	0	188.51	31.3648	46	S4R270;A0A5F8MQ05;D3Z6Q9;S4R1B8;S4R2J8;S4R171;A0A3Q4EBR8;S4R1Q1;A0A0G2JEG8;A0A668KM31;Q7TQF7	S4R270;A0A5F8MQ05;D3Z6Q9;S4R1B8;S4R2J8	Bridging integrator 2
Naca	25.5239	5	0	54.693	28.3838	11	Q60817;P70670	Q60817;P70670	Nascent polypeptide-associated complex subunit alpha;Nascent polypeptide-associated complex subunit alpha, muscle-specific form
Rpl7a	25.5075	16	0	68.077	30.0267	25	P12970;V9GX35	P12970	60S ribosomal protein L7a
Cox7a2	25.5059	2	0	6.7622	28.5872	6	P48771	P48771	Cytochrome c oxidase subunit 7A2, mitochondrial
Msn	25.5033	34	0	219.93	31.266	80	P26041	P26041	Moesin
Eef1d	25.4872	8	0	68.364	29.7303	10	E9QN08;Q80T06;P57776;A0A0R4J1E2;D3YUQ9	E9QN08;Q80T06;P57776;A0A0R4J1E2;D3YUQ9	Elongation factor 1-delta
Atp5h	25.4522	14	0	68.336	30.6094	32	Q9DCX2;B1ASE2	Q9DCX2;B1ASE2	ATP synthase subunit d, mitochondrial
Rpl7	25.4481	20	0	54.502	30.2075	29	P14148;F6XI62	P14148;F6XI62	60S ribosomal protein L7
Uqcrc2	25.4367	19	0	103.41	30.5115	29	Q9DB77;A0A140LI98	Q9DB77	Cytochrome b-c1 complex subunit 2, mitochondrial
Clic1	25.4119	17	0	93.097	29.7184	24	Q9Z1Q5	Q9Z1Q5	Chloride intracellular channel protein 1
Got2	25.405	20	0	134.9	31.0491	40	P05202	P05202	Aspartate aminotransferase, mitochondrial
Glud1	25.3918	28	0	137.51	31.1375	53	P26443;F7CFA5	P26443	Glutamate dehydrogenase 1, mitochondrial
Prdx6	25.3826	19	0	136.6	30.1696	34	Q6GT24;O08709;D3Z0Y2;Q8BG37;A0A0A6YXQ7	Q6GT24;O08709;D3Z0Y2	Peroxiredoxin-6
Mdh1	25.3772	9	0	49.743	29.7547	11	P14152;A0A5F8MPN8;B1ATQ3	P14152;A0A5F8MPN8	Malate dehydrogenase, cytoplasmic
Gsn	25.3765	32	0	234.05	31.9799	88	P13020;A0A0J9YUQ8;CON__Q3SX14;A0A0J9YUJ8	P13020;A0A0J9YUQ8	Gelsolin
Etfb	25.3729	13	0	63.753	29.6858	18	Q9DCW4;A0A0U1RNP5;A0A0N4SVE0;A0A0U1RNR3;A0A0N4SWE9;A0A0U1RNK9;A0A0U1RQB4	Q9DCW4;A0A0U1RNP5;A0A0N4SVE0;A0A0U1RNR3;A0A0N4SWE9;A0A0U1RNK9	Electron transfer flavoprotein subunit beta
Rab27b	25.347	14	0	50.685	29.3739	25	Q99P58	Q99P58	Ras-related protein Rab-27B
Atp5o	25.343	9	0	93.971	29.9258	21	Q9DB20;A0A338P7G3;F7D3P8;A0A338P776;F6XVM5	Q9DB20	ATP synthase subunit O, mitochondrial
Ca1	25.3333	12	0	75.198	30.3605	23	P13634;D3YYQ4	P13634	Carbonic anhydrase 1
Slc4a1	25.3305	24	0	202.68	31.8356	63	P04919	P04919	Band 3 anion transport protein
Tpi1	25.3223	15	0	68.318	30.8775	31	P17751;H7BXC3	P17751;H7BXC3	Triosephosphate isomerase
Wdr1	25.305	34	0	323.31	31.7695	68	O88342;A0A0J9YU05	O88342	WD repeat-containing protein 1
Hsp90aa1	25.2993	29	0	210.88	31.4426	69	P07901;B7ZC50;A2A6A2;B7ZC49	P07901	Heat shock protein HSP 90-alpha
Ilk	25.2947	20	0	79.64	30.5607	48	O55222;D3YZA5;A0A1B0GRF6;A0A1B0GR42	O55222;D3YZA5	Integrin-linked protein kinase
Acat1	25.2909	19	0	106.85	30.1548	33	Q8QZT1	Q8QZT1	Acetyl-CoA acetyltransferase, mitochondrial
Rps8	25.2896	9	0	42.718	28.6396	9	P62242	P62242	40S ribosomal protein S8
Slc2a3	25.2845	8	0	112.33	29.3551	15	P32037	P32037	Solute carrier family 2, facilitated glucose transporter member 3
Lsp1	25.2808	15	0	139.54	30.6349	22	P19973	P19973	Lymphocyte-specific protein 1
Aco2	25.2667	40	0	266.48	31.6092	75	Q99KI0;A0A2R8W744;A0A2R8VJW0;A0A2R8VHM8	Q99KI0	Aconitate hydratase, mitochondrial
Taldo1	25.264	18	0	60.002	30.0283	33	A0A1B0GR11;Q93092	A0A1B0GR11;Q93092	Transaldolase
Hsd17b10	25.2502	18	0	135.03	29.6316	38	Q99N15;A2AFQ2;O08756	Q99N15;A2AFQ2;O08756	3-hydroxyacyl-CoA dehydrogenase type-2
Aqp1	25.2451	3	0	54.311	29.1671	5	Q02013	Q02013	Aquaporin-1
Rpl11	25.2076	6	0	12.177	28.5883	8	Q9CXW4;A2BH06	Q9CXW4;A2BH06	60S ribosomal protein L11
Rab7a	25.2056	12	0	55.55	29.2921	17	P51150;A0A0N4SVG9;A0A0N4SVR6	P51150	Ras-related protein Rab-7a
Rps17	25.1973	9	0	54.558	28.9491	17	P63276	P63276	40S ribosomal protein S17
Ran;1700009N14Rik	25.1959	11	0	40.135	29.4706	13	P62827;Q14AA6;Q61820	P62827;Q14AA6	GTP-binding nuclear protein Ran
Rps2	25.191	15	0	52.811	30.3358	23	P25444;D3YVC1;D3YWJ3	P25444;D3YVC1;D3YWJ3	40S ribosomal protein S2
Stom	25.1845	11	0	82.109	29.319	33	P54116	P54116	Erythrocyte band 7 integral membrane protein
Apoa1	25.179	16	0	42.717	29.2657	21	Q00623;A0A1L1STX7	Q00623	Apolipoprotein A-I;Proapolipoprotein A-I;Truncated apolipoprotein A-I
Dstn	25.1692	12	0	58.513	29.3981	25	Q9R0P5	Q9R0P5	Destrin
Rpl18	25.1664	5	0	25.175	28.0168	8	A0A1B0GSS8;A0A1B0GQU8;P35980;A0A1B0GSA8;A0A1B0GSF7;A0A1B0GRZ3	A0A1B0GSS8;A0A1B0GQU8;P35980;A0A1B0GSA8;A0A1B0GSF7	60S ribosomal protein L18
Ywhag	25.1618	13	0	77.018	29.9695	33	P61982	P61982	14-3-3 protein gamma;14-3-3 protein gamma, N-terminally processed
Rps7	25.1573	10	0	60.035	30.1459	27	P62082	P62082	40S ribosomal protein S7
Gp1bb	25.1521	5	0	10.283	28.0856	6	B2RR03;P56400	B2RR03;P56400	Platelet glycoprotein Ib beta chain
Rab1A	25.1481	11	0	63.56	29.1362	20	P62821;Q3TYH2;Q8K386	P62821	Ras-related protein Rab-1A
Cyb5a	25.1316	4	0	54.487	29.2347	9	G5E850;P56395;E0CY88;A0A494B9D8	G5E850;P56395;E0CY88	Cytochrome b5
Chil3	25.129	17	0	63.477	29.7947	28	O35744;Q91Z98;F6RU51	O35744	Chitinase-like protein 3
Rplp0	25.127	14	0	68.764	29.5424	26	P14869;S4R1N1;D3YVM5	P14869;S4R1N1;D3YVM5	60S acidic ribosomal protein P0
Csrp1	25.1254	10	0	101.14	30.364	17	P97315	P97315	Cysteine and glycine-rich protein 1
Ifi47	25.1251	25	0	152.6	30.3358	39	Q61635;A0A1L1SQM2;A6PWD6;Q5NCB2;Q5SVP2;Q5SVP0;Q5NCB3	Q61635
Mtco2	25.1155	5	0	39.213	29.0916	23	P00405	P00405	Cytochrome c oxidase subunit 2
Eef1g	25.1055	20	0	95.079	30.641	36	Q9D8N0	Q9D8N0	Elongation factor 1-gamma
Rpl38	25.1041	6	0	19.432	28.3507	9	Q9JJI8	Q9JJI8	60S ribosomal protein L38
P4hb	25.1011	31	0	204.46	31.2057	75	P09103;E9Q8G8	P09103	Protein disulfide-isomerase
Rps12	25.1005	10	0	56.812	29.0181	26	Q6ZWZ6;F7AEH4;A0A1W2P7A1;P63323	Q6ZWZ6;F7AEH4;A0A1W2P7A1;P63323	40S ribosomal protein S12
Gnai2	25.0992	19	0	184.14	29.9018	29	P08752;A0A0A6YWA9;B2RSH2	P08752;A0A0A6YWA9	Guanine nucleotide-binding protein G(i) subunit alpha-2
Rab5c	25.098	7	0	21.453	28.6855	9	Q8C266;P35278;A2A5F5;A2A5F6	Q8C266;P35278	Ras-related protein Rab-5C
Vim	25.0956	38	0	216.36	31.1743	66	P20152;A0A0A6YWC8;A2AKJ2;P31001;P15331;G5E846;A0A2R8W6R6;G3X981;CON__P05787;CON__Q9NSB2;CON__Q6ISB0;CON__Q3KNV1;CON__P08729;Q9Z2T6;Q6IMF0;E9Q1Y9;CON__Q61726;A0A0R4J036;CON__O43790;CON__H-INV:HIT000292931;CON__Q6NT21;CON__P78385;CON__P07744;CON__Q9H552;Q99M73;CON__Q14533;Q3UV17;CON__P78386;P08553;CON__Q8N1N4-2;CON__Q7RTT2;CON__P12035;D3YZ35;P46660;CON__Q01546;P03995;P08551;P07744;E9Q1Z0;Q9ERE2;P97…	P20152;A0A0A6YWC8	Vimentin
Abracl	25.0929	3	0	14.462	28.9199	5	A0A1W2P7X0;E9QMV2;Q4KML4	A0A1W2P7X0;E9QMV2;Q4KML4	Costars family protein ABRACL
Esd	25.0828	13	0	75.666	29.9432	27	H3BKH6;Q9R0P3;H3BJP2;H3BLJ9;H3BJL6;H3BK43;H3BJC6;H3BL99	H3BKH6;Q9R0P3;H3BJP2;H3BLJ9;H3BJL6;H3BK43	S-formylglutathione hydrolase
Rps16	25.0743	9	0	24.681	29.1832	17	P14131	P14131	40S ribosomal protein S16
Tkt	25.0733	32	0	232.58	31.4513	72	P40142;A0A286YE28	P40142;A0A286YE28	Transketolase
Hnrnpd	25.0699	9	0	24.765	28.8874	13	F6ZV59;G5E8G0;G3X9W0;Q60668;E9Q5B6;F6SHF3;Q9D3U4	F6ZV59;G5E8G0;G3X9W0;Q60668;E9Q5B6;F6SHF3	Heterogeneous nuclear ribonucleoprotein D0
Snrpd1	25.0523	4	0	25.489	28.0204	6	P62315;A0A3Q4L381;A0A3Q4L2W0	P62315	Small nuclear ribonucleoprotein Sm D1
Gnb2l1	25.05	18	0	97.07	30.2412	28	P68040	P68040	Guanine nucleotide-binding protein subunit beta-2-like 1;Guanine nucleotide-binding protein subunit beta-2-like 1, N-terminally processed
Parvb	25.0426	13	0	69.992	30.1665	25	Q9ES46;Q3UF75;Q9EPC1	Q9ES46	Beta-parvin
Vdac3	25.0172	11	0	59.388	29.3857	15	Q60931;J3QMG3	Q60931;J3QMG3	Voltage-dependent anion-selective channel protein 3
Etfa	24.99	15	0	95.29	29.7726	30	Q99LC5	Q99LC5	Electron transfer flavoprotein subunit alpha, mitochondrial
Cs;Csl	24.9833	15	0	89.066	30.5481	39	Q9CZU6;Q80X68	Q9CZU6;Q80X68	Citrate synthase, mitochondrial;Citrate synthase
Sdpr	24.9807	13	0	131.59	30.0173	20	Q63918	Q63918	Serum deprivation-response protein
Pgk1	24.9761	22	0	161.75	31.0066	49	P09411;S4R2M7;P09041	P09411;S4R2M7	Phosphoglycerate kinase 1;Phosphoglycerate kinase
Usmg5	24.97	3	0	19.538	26.5549	3	Q78IK2	Q78IK2	Up-regulated during skeletal muscle growth protein 5
Gnb2	24.9654	14	0	101.22	29.6486	26	P62880;E9QKR0;D3YZX3;D3Z1M1;D3Z1T4;E9PWM7	P62880;E9QKR0;D3YZX3;D3Z1M1;D3Z1T4;E9PWM7	Guanine nucleotide-binding protein G(I)/G(S)/G(T) subunit beta-2
Cpox	24.9586	22	0	125.62	30.8879	46	P36552	P36552	Oxygen-dependent coproporphyrinogen-III oxidase, mitochondrial
Lims1	24.9228	19	0	97.535	30.4606	43	Q99JW4	Q99JW4	LIM and senescent cell antigen-like-containing domain protein 1
Erp29	24.9171	11	0	38.838	28.8385	15	P57759;F8WJI4;F8WIM7;D6RG87	P57759	Endoplasmic reticulum resident protein 29
Hspa9	24.9134	36	0	191.63	30.8486	55	P38647	P38647	Stress-70 protein, mitochondrial
Cndp2	24.9095	28	0	181.46	30.2265	51	Q9D1A2;A0A494B9S3;A0A494B9U6	Q9D1A2	Cytosolic non-specific dipeptidase
Hnrnpa3	24.8933	21	0	101.83	30.1752	35	A2AL12;Q8BG05;A2AL13;V9GX38	A2AL12;Q8BG05	Heterogeneous nuclear ribonucleoprotein A3
Cycs	24.8804	7	0	34.388	28.6815	12	P62897;CON__P62894;P00015	P62897	Cytochrome c, somatic
Phb	24.8706	13	0	49.684	29.9051	26	P67778;Q5SQG5	P67778;Q5SQG5	Prohibitin
Arpc3	24.8694	10	0	39.158	28.9752	33	Q9JM76;H7BWZ3;A0A0G2JFK7;D3Z2F7;D3Z2F8	Q9JM76;H7BWZ3;A0A0G2JFK7;D3Z2F7;D3Z2F8	Actin-related protein 2/3 complex subunit 3
Rps4x	24.8589	22	0	73.022	29.9415	32	P62702;V9GWY0	P62702	40S ribosomal protein S4, X isoform
Gdi2	24.8588	37	0	246.2	31.2348	73	Q61598;A0A1Y7VL99;A0A1Y7VLG4	Q61598;A0A1Y7VL99	Rab GDP dissociation inhibitor beta
Rpl13a	24.8586	7	0	13.877	28.2334	13	P19253;A0A1B0GSB2;A0A1B0GSQ6;A0A1B0GS68;A0A1B0GTA1;A0A1B0GQW6;A0A1B0GSL5;A0A1B0GSC2;A0A1B0GRH1;A0A1B0GSF0;A0A1B0GT00;A0A1B0GSJ2	P19253;A0A1B0GSB2;A0A1B0GSQ6;A0A1B0GS68;A0A1B0GTA1	60S ribosomal protein L13a
Cd68	24.855	5	0	15.802	28.6004	10	A0A0R4J1C8;P31996	A0A0R4J1C8;P31996	Macrosialin
Cyb5r3	24.8541	16	0	89.201	29.8632	33	Q9DCN2;F2Z456	Q9DCN2;F2Z456	NADH-cytochrome b5 reductase 3;NADH-cytochrome b5 reductase 3 membrane-bound form;NADH-cytochrome b5 reductase 3 soluble form;NADH-cytochrome b5 reductase
Rpl10a	24.8501	9	0	42.075	29.6515	17	A0A3B2WDD2;A0A3B2WBL1;Q5XJF6;P53026;A0A3B2W824;A0A3B2W820;A0A3B2WCA5;D6RE43	A0A3B2WDD2;A0A3B2WBL1;Q5XJF6;P53026;A0A3B2W824	Ribosomal protein;60S ribosomal protein L10a
Ighm	24.8451	16	0	101.76	29.8686	27	A0A075B5P6;A0A075B6A0;P01872	A0A075B5P6;A0A075B6A0;P01872	Ig mu chain C region
Rpl23	24.8423	7	0	22.569	28.2972	10	P62830;A2A6F8	P62830	60S ribosomal protein L23
Fhl1	24.8391	13	0	84.73	29.7269	20	P97447;A2AEX8;A2AEX6;A2AEY1;A2AEY2;A2AEX7;A2AEY0;A2AEX9	P97447;A2AEX8;A2AEX6;A2AEY1;A2AEY2;A2AEX7	Four and a half LIM domains protein 1
Ywhaq	24.8159	10	0	145.24	29.5291	15	P68254	P68254	14-3-3 protein theta
Psme1	24.8059	17	0	131.28	30.2831	27	G3UXZ5;P97371;G3UXY0;G3X9K9;G3UWN9;G3UXR1	G3UXZ5;P97371;G3UXY0;G3X9K9;G3UWN9	Proteasome activator complex subunit 1
Ckb	24.7922	17	0	126.55	29.986	45	Q04447	Q04447	Creatine kinase B-type
Fth1	24.7894	14	0	53.373	29.748	25	P09528;A0A494B9D4;A0A494BA92;A0A494BAP3;Q9D5H4	P09528;A0A494B9D4;A0A494BA92	Ferritin heavy chain;Ferritin heavy chain, N-terminally processed
	24.7748	5	0	43.629	27.3976	13	P01837;A0A5H1ZRK8	P01837;A0A5H1ZRK8	Ig kappa chain C region
Rpl24	24.7531	4	0	12.464	27.8537	6	Q8BP67	Q8BP67	60S ribosomal protein L24
Eef1b;Eef1b2	24.7507	8	0	67.966	28.8512	15	O70251;A0A087WS46;G3UX43;G3UZ47;M0QWK5;M0QWH8	O70251;A0A087WS46	Elongation factor 1-beta
Rps3a	24.7435	16	0	83.958	29.9421	20	P97351	P97351	40S ribosomal protein S3a
Atp2a3	24.7413	35	0	188.81	30.8329	58	B1ATS5;E9Q559;B1ATS4;Q64518	B1ATS5;E9Q559;B1ATS4;Q64518	Calcium-transporting ATPase;Sarcoplasmic/endoplasmic reticulum calcium ATPase 3
Uqcrb	24.7352	8	0	25.763	28.7271	12	Q9CQB4;Q9D855	Q9CQB4;Q9D855	Cytochrome b-c1 complex subunit 7
C1qb	24.7303	6	0	35.589	28.8644	8	P14106	P14106	Complement C1q subcomponent subunit B
Ctsz	24.73	11	0	99.632	29.6752	19	Q9WUU7	Q9WUU7	Cathepsin Z
Uqcrc1	24.7294	18	0	114.53	30.2427	32	Q9CZ13;A0A0A6YW82;A0A0A6YWX6;A0A0A6YVZ0	Q9CZ13	Cytochrome b-c1 complex subunit 1, mitochondrial
Cct5	24.7192	28	0	164.48	30.6166	56	P80316;E0CZA1	P80316	T-complex protein 1 subunit epsilon
Hmox1	24.705	14	0	73.157	29.6891	34	P14901	P14901	Heme oxygenase 1
Plbd1	24.6984	23	0	138.76	29.9355	35	A0A0R4J0B2;Q8VCI0	A0A0R4J0B2;Q8VCI0	Phospholipase B-like 1;Phospholipase B-like 1 chain A;Phospholipase B-like 1 chain B;Phospholipase B-like 1 chain C
H2afv;H2afz	24.6935	3	0	59.132	28.6799	3	Q3THW5;P0C0S6;Q8R029;Q3UA95;G3UWL7	Q3THW5;P0C0S6;Q8R029;Q3UA95	Histone H2A.V;Histone H2A.Z;Histone H2A
Efhd2	24.679	14	0	49.593	29.1957	19	Q8C845;Q9D8Y0;Q9D4J1	Q8C845;Q9D8Y0	EF-hand domain-containing protein D2
Ak2	24.6747	11	0	68.502	29.3847	20	Q9WTP6;F7BP55	Q9WTP6	Adenylate kinase 2, mitochondrial;Adenylate kinase 2, mitochondrial, N-terminally processed
Ptges3	24.6728	7	0	29.615	28.4078	9	Q9R0Q7;D3Z7C6	Q9R0Q7;D3Z7C6	Prostaglandin E synthase 3
Sord	24.6655	14	0	66.903	29.9516	29	Q64442	Q64442	Sorbitol dehydrogenase
H2-Aa	24.658	6	0	40.032	28.8428	12	P14434;P14438;G3UWR9;P14437;P14436;P14435;P23150;P04228;P01910;P04227	P14434;P14438;G3UWR9;P14437;P14436;P14435;P23150;P04228;P01910	H-2 class II histocompatibility antigen, A-B alpha chain;H-2 class II histocompatibility antigen, A-U alpha chain;Beta-2-microglobulin;H-2 class II histocompatibility antigen, A-S alpha chain;H-2 class II histocompatibility antigen, A-R alpha chain;H-2 class II histocompatibility antigen, A-F alpha chain;H-2 class II histocompatibility antigen, I-E alpha chain;H-2 class II histocompatibility anti…
H2-Ab1	24.655	12	0	69.137	30.242	20	P14483;P06346;P06344;P06343;A0A494B9G5;P06345;A0A494B9U2;P01921;P06342	P14483;P06346;P06344;P06343;A0A494B9G5;P06345;A0A494B9U2;P01921	H-2 class II histocompatibility antigen, A beta chain;H-2 class II histocompatibility antigen, A-F beta chain;H-2 class II histocompatibility antigen, A-U beta chain;H-2 class II histocompatibility antigen, A-K beta chain;H-2 class II histocompatibility antigen, A-S beta chain;H-2 class II histocompatibility antigen, A-D beta chain
Plac8	24.6498	1	0	5.8701	25.6498	1	Q9JI48	Q9JI48	Placenta-specific gene 8 protein
Rpl4	24.6492	20	0	86.169	30.218	29	Q9D8E6	Q9D8E6	60S ribosomal protein L4
Rps27l	24.64	4	0	16.814	27.1622	6	Q6ZWY3;D6RH49;D3YYB0	Q6ZWY3;D6RH49;D3YYB0	40S ribosomal protein S27-like;40S ribosomal protein S27
Psma6	24.6381	11	0	43.045	28.9592	15	Q9QUM9;E0CXB1;E0CYT2	Q9QUM9;E0CXB1	Proteasome subunit alpha type-6
S100a11	24.6359	4	0	47.018	27.4772	5	P50543	P50543	Protein S100-A11
Rps20	24.6296	6	0	26.002	29.6273	13	P60867	P60867	40S ribosomal protein S20
Rpl27a	24.6281	5	0	11.446	27.6374	5	P14115	P14115	60S ribosomal protein L27a
Capza2	24.6276	14	0	118.36	29.7315	23	P47754;D6RCW7;A0A0N4SVM0	P47754;D6RCW7;A0A0N4SVM0	F-actin-capping protein subunit alpha-2
Hmgb1	24.6273	11	0	56.948	30.4985	27	A0A0J9YUZ4;P63158;A0A0J9YUD8;D3YZ18;D3YVC6	A0A0J9YUZ4;P63158;A0A0J9YUD8	High mobility group protein B1
Rpl18a	24.6239	6	0	16.509	27.7117	7	A0A1D5RLW5;A0A1D5RM85;P62717;A0A1D5RME4;A0A1D5RM79;A0A1D5RMC7	A0A1D5RLW5;A0A1D5RM85;P62717;A0A1D5RME4;A0A1D5RM79	60S ribosomal protein L18a
Ehd4	24.6207	28	0	118.08	29.8352	38	Q9EQP2	Q9EQP2	EH domain-containing protein 4
Ncl	24.6197	22	0	108.33	30.235	35	P09405	P09405	Nucleolin
Canx	24.6152	26	0	151.62	30.8906	55	P35564	P35564	Calnexin
Psma7	24.6125	11	0	48.092	29.2822	18	Q9Z2U0;A0A338P7D7;B7ZMS4;Q9CWH6;A0A3Q4L361;A0A3Q4EHS3;A0A3Q4EG42	Q9Z2U0;A0A338P7D7	Proteasome subunit alpha type-7
Hnrnpk	24.6125	18	0	109.99	29.8631	40	P61979;B2M1R6;H3BLL4;A0A286YDM3;H3BK96;H3BKD0;A0A286YCM2;A0A286YEC4;H3BKI8;A0A286YDH1;H3BJS9;Q8BT23;A0A286YE41;H3BJ43;H3BLP7	P61979;B2M1R6;H3BLL4;A0A286YDM3;H3BK96;H3BKD0;A0A286YCM2	Heterogeneous nuclear ribonucleoprotein K
Phb2	24.6092	13	0	63.003	29.7807	20	O35129;F6QPR1;F6Q8V7	O35129;F6QPR1	Prohibitin-2
Pdlim1	24.5996	21	0	147.44	30.1996	30	O70400;S4R1V0	O70400;S4R1V0	PDZ and LIM domain protein 1
Erh	24.5995	3	0	34.107	26.7383	3	A0A1W2P7H9;A0A1W2P7T3;P84089;G3UW85	A0A1W2P7H9;A0A1W2P7T3;P84089	Enhancer of rudimentary homolog
Rps14	24.5973	9	0	43.318	28.2816	13	P62264;D3YVF4;D3Z7I1;A0A494BAS4	P62264;D3YVF4;D3Z7I1	40S ribosomal protein S14
Fcer1g	24.5945	2	0	14.591	27.5813	7	P20491	P20491	High affinity immunoglobulin epsilon receptor subunit gamma
Cct8	24.5926	29	0	97.119	30.2041	42	P42932;H3BL49;H3BJB6;H3BKG2;H3BLL1;H3BKR8	P42932;H3BL49	T-complex protein 1 subunit theta
H2-D1;H2-L	24.5868	14	0	46.455	30.0267	22	G3UZP7;P01899;P01897;Q8HWB2;P01900;P01898;P01896;G3UXE9;E9Q0G4;O19441;A7VMS6;E9PX63;Q4KN81;P14427;P01895;V9GXR0;V9GXI4	G3UZP7;P01899;P01897	H-2 class I histocompatibility antigen, D-B alpha chain;H-2 class I histocompatibility antigen, L-D alpha chain
Tmem14c	24.5822	3	0	11.665	27.0349	7	Q9CQN6	Q9CQN6	Transmembrane protein 14C
Tpt1	24.5713	4	0	21.965	28.4201	9	P63028;D3YU75	P63028;D3YU75	Translationally-controlled tumor protein
Acadl	24.5702	19	0	96.452	30.1176	31	A0A0R4J083;P51174	A0A0R4J083;P51174	Long-chain specific acyl-CoA dehydrogenase, mitochondrial
Dbi	24.5657	3	0	6.7506	26.5657	2	P31786;D3Z563;Q4VWZ5;M0QWU8	P31786;D3Z563;Q4VWZ5	Acyl-CoA-binding protein
Prdx3	24.5647	8	0	39.519	29.6189	21	P20108	P20108	Thioredoxin-dependent peroxide reductase, mitochondrial
Stx7	24.5613	7	0	53.574	28.0608	7	Q8BH40;O70439	Q8BH40;O70439	Syntaxin-7
Atp5c1	24.545	11	0	35.18	28.6378	24	Q8C2Q8;Q91VR2;A2AKU9;A2AKV2;A2AKV3;A2AKV1;A2AKV0	Q8C2Q8;Q91VR2;A2AKU9;A2AKV2;A2AKV3;A2AKV1	ATP synthase subunit gamma;ATP synthase subunit gamma, mitochondrial
Tpd52	24.5437	9	0	74.441	28.1383	15	E9PUA7;D3Z125;D3Z7X7;F8WHQ1;Q62393;D3Z637;D3Z2U2	E9PUA7;D3Z125;D3Z7X7;F8WHQ1;Q62393;D3Z637;D3Z2U2	Tumor protein D52
Tmsb10	24.5388	2	0	12.454	25.6803	2	Q6ZWY8;A0A0N4SVF0	Q6ZWY8;A0A0N4SVF0	Thymosin beta-10
Arf3;Arf2	24.532	12	0	59.474	28.7765	21	P61205;Q8BSL7;A2A6T9	P61205;Q8BSL7	ADP-ribosylation factor 3;ADP-ribosylation factor 2
Pnp;Pnp2	24.5204	15	0	87.732	29.5089	26	Q543K9;P23492;A0A2I3BQH2;Q9D8C9;A0A2I3BS22	Q543K9;P23492;A0A2I3BQH2;Q9D8C9	Purine nucleoside phosphorylase
Pcna	24.5173	9	0	54.997	28.8937	20	P17918	P17918	Proliferating cell nuclear antigen
Akr1b1;Akr1b3	24.5042	12	0	41.32	29.4355	18	P45376;D3YVJ7	P45376;D3YVJ7	Aldose reductase
Hnrnpab	24.4941	9	0	25.538	28.5845	13	Q20BD0;Q80XR6;Q99020	Q20BD0;Q80XR6;Q99020	Heterogeneous nuclear ribonucleoprotein A/B
Sri	24.4912	11	0	30.939	28.5186	14	Q6P069	Q6P069	Sorcin
Park7	24.4911	11	0	102.34	29.3617	18	Q99LX0;A2A813;A2A815;A2A817;A2A816	Q99LX0;A2A813;A2A815	Protein deglycase DJ-1
Pdia4	24.4887	33	0	166.98	30.4096	51	A0A0R4J0Z1;P08003	A0A0R4J0Z1;P08003	Protein disulfide-isomerase A4
Tgm2	24.4835	28	0	133.65	30.1067	43	P21981;G3UXE8;Q9D7I9	P21981	Protein-glutamine gamma-glutamyltransferase 2
S100a4	24.4783	3	0	7.8446	27.7296	7	A0A0G2JGD2;P07091	A0A0G2JGD2;P07091	Protein S100-A4
Acaa2	24.4757	23	0	163.94	29.8651	39	Q8BWT1;A0A494B9J2	Q8BWT1	3-ketoacyl-CoA thiolase, mitochondrial
Sfxn1	24.475	11	0	42.477	29.099	15	Q99JR1	Q99JR1	Sideroflexin-1
Idh3a	24.4641	16	0	66.455	29.478	26	A0A1L1STE6;Q9D6R2	A0A1L1STE6;Q9D6R2	Isocitrate dehydrogenase [NAD] subunit alpha, mitochondrial
	24.4505	1	0.0025619	1.8184	27.0355	4	A0A7P0A164;A0A571BEE9	A0A7P0A164;A0A571BEE9
Rplp1	24.4482	3	0	56.104	27.8989	6	P47955	P47955	60S acidic ribosomal protein P1
Mfsd2b	24.447	1	0	3.4108	26.0319	1	D6RDD7;B8JK43;Q3T9M1	D6RDD7;B8JK43;Q3T9M1	Major facilitator superfamily domain-containing protein 2B
Capns1	24.4443	11	0	61.619	28.8296	21	A0A0R4IZW8;O88456;A0A0R4J1C2;Q9D7J7	A0A0R4IZW8;O88456;A0A0R4J1C2	Calpain small subunit 1
Atp6v1g1	24.4408	6	0	37.996	27.5026	8	Q9CR51	Q9CR51	V-type proton ATPase subunit G 1
Rhog	24.4357	13	0	74.645	28.9216	14	P84096;A0A1B0GSL4	P84096	Rho-related GTP-binding protein RhoG
Ptpn6	24.4336	22	0	92.966	29.932	34	P29351;G3UZU6;G3UXM2	P29351	Tyrosine-protein phosphatase non-receptor type 6
Cct7	24.422	22	0	92.539	30.0025	39	P80313;A0A0N4SV00;A0A0N4SUI8;A0A0N4SV22	P80313;A0A0N4SV00	T-complex protein 1 subunit eta
Tfrc	24.4052	24	0	168.3	30.4213	42	Q62351;Q8C872	Q62351;Q8C872	Transferrin receptor protein 1
Ostf1	24.4051	9	0	33.049	28.8303	13	Q62422;A0A494BA97;A0A494B943	Q62422;A0A494BA97	Osteoclast-stimulating factor 1
Cct3	24.4006	26	0	89.481	30.4054	34	P80318;E9Q133;Q3U0I3;F6Q609;F6ZVG8	P80318;E9Q133;Q3U0I3;F6Q609	T-complex protein 1 subunit gamma
Psmb4	24.4002	8	0	60.9	28.1753	16	P99026	P99026	Proteasome subunit beta type-4
Hint1	24.3916	5	0	20.27	28.0862	6	P70349;B0R1E3	P70349;B0R1E3	Histidine triad nucleotide-binding protein 1
Serpinb1a	24.3893	20	0	58.076	29.3274	29	Q9D154;Z4YK03;Q8VHP7;Q5SV42	Q9D154	Leukocyte elastase inhibitor A
Atp5e	24.3888	3	0	4.8439	25.9738	3	P56382	P56382	ATP synthase subunit epsilon, mitochondrial
Mrps36	24.3776	4	0	21.494	27.2032	6	Q9CQX8;Q9D6T9	Q9CQX8;Q9D6T9	28S ribosomal protein S36, mitochondrial
Coro1b	24.3736	21	0	95.65	30.288	42	Q9WUM3;A0A494B9Y4;D3YUG6;A0A494BAI1	Q9WUM3	Coronin-1B
Psma1	24.3636	14	0	65.323	29.478	30	Q9R1P4;A0A1B0GS70	Q9R1P4;A0A1B0GS70	Proteasome subunit alpha type-1
Ssr1	24.3604	4	0	6.682	27.7387	5	Q9CY50;A0A286YDB7;A0A286YCT4;A0A286YCG8	Q9CY50;A0A286YDB7;A0A286YCT4;A0A286YCG8	Translocon-associated protein subunit alpha
Pld4	24.3596	16	0	64.856	29.6665	36	Q8BG07	Q8BG07	Phospholipase D4
Blvra	24.3497	14	0	83.135	29.1643	18	Q9CY64;A2ASB1;A2ASB8;A2ASB7	Q9CY64	Biliverdin reductase A
Ube2v1;Gm20431	24.3408	6	0	12.623	27.6628	8	Q9CZY3;E9PY39;B7ZBY7	Q9CZY3;E9PY39;B7ZBY7	Ubiquitin-conjugating enzyme E2 variant 1
Vwf	24.3382	94	0	323.31	32.6453	153	E9QPU1;Q8CIZ8;Q3TPE1;Q3TD35;S4R195	E9QPU1;Q8CIZ8	von Willebrand factor;von Willebrand antigen 2
Gm5862	24.3345	1	0.0087551	1.4001	27.6564	1	K7N5V5;A0A0G2JGR8	K7N5V5;A0A0G2JGR8
Ctsc	24.334	7	0	46.087	28.834	9	P97821;D3Z220	P97821	Dipeptidyl peptidase 1;Dipeptidyl peptidase 1 exclusion domain chain;Dipeptidyl peptidase 1 heavy chain;Dipeptidyl peptidase 1 light chain
Sub1	24.3307	3	0	7.6147	26.7539	3	P11031	P11031	Activated RNA polymerase II transcriptional coactivator p15
Atp5l	24.3269	4	0	12.669	28.5855	9	Q9CPQ8	Q9CPQ8	ATP synthase subunit g, mitochondrial
Ddx5	24.3235	21	0	84.002	29.7375	24	Q8BTS0;Q61656;S4R1I6;B1ARB9;B1ARC0;S4R1E3	Q8BTS0;Q61656;S4R1I6	Probable ATP-dependent RNA helicase DDX5
Capza1	24.3182	11	0	77.583	28.9596	17	P47753;Q5RKN9;A0A0G2JE27	P47753;Q5RKN9	F-actin-capping protein subunit alpha-1
Sdha	24.3164	28	0	215.26	30.8536	52	Q8K2B3;A0A1Y7VJ55	Q8K2B3	Succinate dehydrogenase [ubiquinone] flavoprotein subunit, mitochondrial
Tmsb4x	24.3108	3	0	26.964	29.3277	9	P20065	P20065	Thymosin beta-4;Hematopoietic system regulatory peptide
Uba1	24.2997	39	0	248.5	30.7859	68	Q02053;P31254	Q02053	Ubiquitin-like modifier-activating enzyme 1
Fis1	24.2969	4	0	26.705	27.1043	5	Q9CQ92;G3X9U9;D3YZ32	Q9CQ92;G3X9U9	Mitochondrial fission 1 protein
Lmnb1	24.2931	37	0	207.05	30.7531	63	P14733	P14733	Lamin-B1
Gpx4	24.2781	10	0	34.804	28.7008	16	S4R1E5;O70325	S4R1E5;O70325	Glutathione peroxidase;Phospholipid hydroperoxide glutathione peroxidase, mitochondrial
Cct6a	24.2659	22	0	108.79	29.8765	33	Q52KG9;P80317;Q61390;B1AT05	Q52KG9;P80317	T-complex protein 1 subunit zeta
Anxa6	24.2554	42	0	202.77	30.822	61	P14824;F8WIT2	P14824;F8WIT2	Annexin A6;Annexin
Pck2	24.253	30	0	169.15	30.0005	45	A0A0R4J0G0;Q8BH04;A0A2I3BQL9;A0A2I3BS39;A0A2I3BRX1;A0A2I3BQC6;A0A2I3BQ75;Q9Z2V4	A0A0R4J0G0;Q8BH04;A0A2I3BQL9;A0A2I3BS39;A0A2I3BRX1	Phosphoenolpyruvate carboxykinase [GTP], mitochondrial
Sod2	24.2526	6	0	21.908	27.9223	9	P09671;A0A3B2WBF0	P09671;A0A3B2WBF0	Superoxide dismutase [Mn], mitochondrial
Rpl34	24.2476	3	0.00030175	2.485	26.8326	3	Q9D1R9;A0A0G2JGY8;A0A0G2JEY6	Q9D1R9;A0A0G2JGY8;A0A0G2JEY6	60S ribosomal protein L34
Myh9	24.2453	114	0	323.31	32.4572	190	Q8VDD5;Q61879;Q5SV64;Q3UH59;A0A2R8VHF9;A0A338P6K2;E9QPE7;O08638;A0A2R8VKI5;F2Z494;A0A2R8W6V7;Q8BXF2;E9Q264;B1AR69;Q02566;P13542;G3UW82;P13541;Q91Z83;Q5SX40;Q5SX39	Q8VDD5	Myosin-9
Anxa2	24.2177	19	0	116.77	29.6065	28	P07356;B0V2N7;B0V2N8;B0V2N5	P07356;B0V2N7;B0V2N8;B0V2N5	Annexin A2;Annexin
Ppif	24.2153	6	0	49.27	29.3218	15	Q99KR7	Q99KR7	Peptidyl-prolyl cis-trans isomerase F, mitochondrial
Rpl15	24.2129	9	0	29.535	28.3033	14	Q9CZM2;B8JKK2	Q9CZM2	60S ribosomal protein L15
Ube2n	24.2081	7	0	23.319	28.179	15	P61089;A0A1W2P7Z3;A0A087WPV1;Q9CQ37	P61089	Ubiquitin-conjugating enzyme E2 N
Serpine2	24.1987	19	0	53.54	29.3266	24	Q07235;A0A087WQM1;A0A087WQ70;A2RSF9	Q07235;A0A087WQM1;A0A087WQ70	Glia-derived nexin
Psme2	24.1916	9	0	89.432	29.1522	17	P97372;G3X9V0;E0CZ90	P97372;G3X9V0;E0CZ90	Proteasome activator complex subunit 2
Atp5f1	24.1846	10	0	39.936	29.1213	22	Q9CQQ7;A0A0G2JGX3	Q9CQQ7;A0A0G2JGX3	ATP synthase F(0) complex subunit B1, mitochondrial
Rpl9	24.1743	8	0	22.506	27.9621	12	P51410;A0A0G2JES3;A0A140T8T4;D3Z629;D3YZT0;A0A0G2JFQ3;S4R1R7	P51410;A0A0G2JES3;A0A140T8T4;D3Z629	60S ribosomal protein L9
Akr1a1	24.1736	13	0	63.84	28.9698	19	Q9JII6;B1AXW3	Q9JII6;B1AXW3	Alcohol dehydrogenase [NADP(+)]
Cmpk1	24.1723	9	0	22.27	28.204	11	Q9DBP5;A0A0R4J093	Q9DBP5;A0A0R4J093	UMP-CMP kinase
Arl8b	24.1712	8	0	41.132	28.3359	9	A0A0N4SVB8;Q9CQW2	A0A0N4SVB8;Q9CQW2	ADP-ribosylation factor-like protein 8B
Blvrb	24.1683	13	0	161.6	30.2332	42	Q923D2;E9PZC3;E9PZC4;A0A0U1RPU7	Q923D2;E9PZC3;E9PZC4	Flavin reductase (NADPH)
Hadha	24.1635	34	0	226.26	30.42	63	Q8BMS1	Q8BMS1	Trifunctional enzyme subunit alpha, mitochondrial;Long-chain enoyl-CoA hydratase;Long chain 3-hydroxyacyl-CoA dehydrogenase
Hexb	24.1628	22	0	68.07	29.8319	31	P20060	P20060	Beta-hexosaminidase subunit beta
Gp1ba	24.1551	14	0	55.987	29.0366	25	O35930	O35930	Platelet glycoprotein Ib alpha chain
Hspa4	24.1516	38	0	288.66	30.4917	57	Q3U2G2;Q61316	Q3U2G2;Q61316	Heat shock 70 kDa protein 4
Arhgdib	24.1503	14	0	120.69	30.4554	44	Q61599;D3YWL7;A0A0N4SVH4	Q61599	Rho GDP-dissociation inhibitor 2
Mmrn1	24.148	29	0	218.85	31.0752	60	A0A0N4SVL8;G3UVV6;B2RPV6	A0A0N4SVL8;G3UVV6;B2RPV6	Multimerin-1
Amy2;Amy2a1	24.1441	22	0	199.87	30.9907	48	P00688;E9PV85;P00687;D3YYQ5;CON__Q3MHH8;G3UXY7	P00688;E9PV85	Pancreatic alpha-amylase;Alpha-amylase
Atic	24.1435	31	0	168.21	29.7925	41	Q9CWJ9	Q9CWJ9	Bifunctional purine biosynthesis protein PURH;Phosphoribosylaminoimidazolecarboxamide formyltransferase;IMP cyclohydrolase
Mrpl12	24.1408	4	0	11.62	27.3714	5	Q9DB15	Q9DB15	39S ribosomal protein L12, mitochondrial
Eif2s1	24.1362	22	0	102.53	28.992	26	Q6ZWX6	Q6ZWX6	Eukaryotic translation initiation factor 2 subunit 1
Idh1	24.1319	21	0	93.823	29.3283	29	O88844;A0A087WPT4;A0A087WRS9;D3YVY3;A0A087WRM4	O88844	Isocitrate dehydrogenase [NADP] cytoplasmic
Idh2	24.1252	18	0	84.455	29.8126	27	P54071;D6RIL6;A0A0U1RP68;A0A0U1RPR1	P54071	Isocitrate dehydrogenase [NADP], mitochondrial
Shmt2	24.1216	23	0	68.129	29.6072	34	Q9CZN7;G3UZ26;G3UYY1;P50431	Q9CZN7	Serine hydroxymethyltransferase
Ssr4	24.1193	4	0	15.806	27.622	10	Q9D8L3;Q62186	Q9D8L3;Q62186	Translocon-associated protein subunit delta
Anp32a	24.1176	9	0	25.361	27.9916	12	D3YYE1;D3Z7M9;O35381;F6UFG6;Q64G17	D3YYE1;D3Z7M9;O35381;F6UFG6	Acidic leucine-rich nuclear phosphoprotein 32 family member A
Lyn	24.1089	26	0	100.2	29.3377	34	P25911;P16277	P25911	Tyrosine-protein kinase Lyn
Cbx3	24.107	6	0	31.818	28.0754	10	Q9DCC5;P23198;D3Z313;D3Z1A9	Q9DCC5;P23198;D3Z313	Chromobox protein homolog 3
Rps10	24.1068	7	0	60	28.466	17	P63325;A0A338P731;Q3UW83;A0A338P7K4	P63325;A0A338P731;Q3UW83;A0A338P7K4	40S ribosomal protein S10
Rps11	24.1063	8	0	16.466	28.2561	10	P62281;A0A1B0GRR3;A0A1B0GSE8	P62281;A0A1B0GRR3;A0A1B0GSE8	40S ribosomal protein S11
Pld3	24.1052	10	0	31.827	28.8922	16	O35405	O35405	Phospholipase D3
Hadhb	24.1015	21	0	88.889	29.5312	35	Q99JY0;D3YXU1	Q99JY0	Trifunctional enzyme subunit beta, mitochondrial;3-ketoacyl-CoA thiolase
Nhp2l1	24.1009	6	0	19.459	27.6317	7	Q9D0T1	Q9D0T1	NHP2-like protein 1;NHP2-like protein 1, N-terminally processed
Srsf3	24.0919	3	0	19.655	27.904	4	P84104	P84104	Serine/arginine-rich splicing factor 3
Cct4	24.0876	26	0	128.29	29.9599	38	P80315;G5E839;G3UYW5	P80315;G5E839	T-complex protein 1 subunit delta
Lrrc59	24.0791	11	0	53.811	28.8731	14	Q922Q8	Q922Q8	Leucine-rich repeat-containing protein 59
Dld	24.0771	16	0	88.224	29.7069	26	O08749	O08749	Dihydrolipoyl dehydrogenase, mitochondrial
Rpl26	24.0693	3	0	5.1163	26.6684	4	B1ARA3;B1ARA5;P61255	B1ARA3;B1ARA5;P61255	60S ribosomal protein L26
Rpl5	24.062	11	0	33.805	29.0808	29	P47962;D3YYV8	P47962;D3YYV8	60S ribosomal protein L5
Fkbp2	24.0562	5	0	31.551	27.0966	7	P45878	P45878	Peptidyl-prolyl cis-trans isomerase FKBP2
H3f3a;H3f3c	24.0535	1	0	38.065	26.4318	9	E0CZ27;P84244;P02301	E0CZ27;P84244;P02301	Histone H3;Histone H3.3;Histone H3.3C
Cct2	24.0425	31	0	142.33	30.0097	50	P80314;A0A1W2P7B7;A0A1W2P828;A0A1W2P6Q3;A0A1W2P8B6;A0A1W2P871	P80314	T-complex protein 1 subunit beta
Rpl17	24.0403	8	0	40.045	28.7061	11	Q6ZWZ7;Q9CPR4;B2RY53	Q6ZWZ7;Q9CPR4	60S ribosomal protein L17
Gsto1	24.0353	11	0	26.312	28.359	13	O09131;A0A494BAB1;A0A494B9X6;A0A494BAY2;A0A494BB82;Q8K2Q2	O09131;A0A494BAB1	Glutathione S-transferase omega-1
Srsf1	24.0318	11	0	24.641	28.0745	17	H7BX95;Q6PDM2;F7AI47;F6QXN3	H7BX95;Q6PDM2	Serine/arginine-rich splicing factor 1
Pa2g4	24.0291	21	0	105.1	29.9697	29	P50580	P50580	Proliferation-associated protein 2G4
Psma4	24.0281	7	0	71.184	28.2541	12	Q9R1P0;E9PW69;E9Q0X0	Q9R1P0;E9PW69;E9Q0X0	Proteasome subunit alpha type-4;Proteasome subunit alpha type
Cox6b1	24.0236	3	0	6.3869	27.3772	5	P56391;A0A140LIU3	P56391;A0A140LIU3	Cytochrome c oxidase subunit 6B1
Cd74	24.0109	9	0	39.54	28.5569	11	P04441	P04441	H-2 class II histocompatibility antigen gamma chain
Stmn1	24.0103	6	0	12.394	27.2134	7	D3Z1Z8;D3Z5N2;P54227;P55821	D3Z1Z8;D3Z5N2;P54227	Stathmin
G6pdx	24.01	29	0	107.6	29.542	37	Q00612;A3KG36;G3UWD6;P97324;REV__P46662	Q00612;A3KG36	Glucose-6-phosphate 1-dehydrogenase X;Glucose-6-phosphate 1-dehydrogenase
Pdhb	23.9667	13	0	49.2	28.8398	16	Q9D051	Q9D051	Pyruvate dehydrogenase E1 component subunit beta, mitochondrial
Acads	23.9666	17	0	91.405	28.7938	26	Q07417	Q07417	Short-chain specific acyl-CoA dehydrogenase, mitochondrial
St13	23.9643	6	0	29.818	27.9333	9	F8WJK8;Q99L47;E9Q1V0;E9Q1X9	F8WJK8;Q99L47;E9Q1V0	Hsc70-interacting protein
Rpl39	23.9618	2	0	5.9674	26.5429	4	P62892	P62892	60S ribosomal protein L39
Ear2	23.9453	5	0	25.657	26.9002	6	P97425;Q923L6;P97426;O35290	P97425	Eosinophil cationic protein 2
Cltc	23.9419	84	0	323.31	31.8165	141	Q68FD5;Q5SXR6;F6Z1R4	Q68FD5;Q5SXR6	Clathrin heavy chain 1;Clathrin heavy chain
Sec23ip	23.9397	7	0	12.758	29.3389	7	G3X928;Q6NZC7	G3X928;Q6NZC7	SEC23-interacting protein
Uqcr10	23.9391	3	0	57.48	27.8523	5	Q8R1I1	Q8R1I1	Cytochrome b-c1 complex subunit 9
Gsr	23.9388	18	0	88.819	29.2689	26	P47791	P47791	Glutathione reductase, mitochondrial
Itgb2	23.9328	21	0	172.64	30.2559	33	Q542I8;P11835;M0QWA7;D3YYP8;D3Z1S4;M0QWJ6	Q542I8;P11835;M0QWA7	Integrin beta;Integrin beta-2
Lgalsl	23.9302	8	0	28.606	27.8691	10	Q8VED9;E9QAC6	Q8VED9	Galectin-related protein
Rpl35a	23.9285	5	0	8.6958	27.115	7	O55142	O55142	60S ribosomal protein L35a
Rpl21	23.9203	5	0	16.656	28.1048	8	Q9CQM8;O09167	Q9CQM8;O09167	60S ribosomal protein L21
Pebp1	23.9114	8	0	71.448	28.9815	13	P70296;D3Z1V4;D6RHS6	P70296;D3Z1V4;D6RHS6	Phosphatidylethanolamine-binding protein 1;Hippocampal cholinergic neurostimulating peptide
Rps26	23.9021	3	0	12.752	26.4432	3	P62855	P62855	40S ribosomal protein S26
Psmb2	23.9021	8	0	28.117	28.0261	17	Q9R1P3	Q9R1P3	Proteasome subunit beta type-2
Clec1b	23.8991	8	0	49.749	28.4298	13	Q9JL99;A0T1G3	Q9JL99	C-type lectin domain family 1 member B
Atox1	23.8965	3	0	36.388	28.4559	5	O08997	O08997	Copper transport protein ATOX1
Tmed10	23.8957	7	0	20.389	27.9196	11	Q9D1D4;A0A1Y7VM54	Q9D1D4;A0A1Y7VM54	Transmembrane emp24 domain-containing protein 10
Rpl31	23.8932	5	0	8.7487	26.8671	5	P62900;A0A0A6YX26;A0A0A6YXL3	P62900;A0A0A6YX26;A0A0A6YXL3	60S ribosomal protein L31
Napsa	23.8926	4	0	11.8	27.5394	5	O09043	O09043	Napsin-A
Vasp	23.8909	17	0	89.451	30.1828	32	P70460	P70460	Vasodilator-stimulated phosphoprotein
Slc35a4	23.8881	2	0	3.5374	25.4731	2	A0A087WQH8	A0A087WQH8
Hnrnpu	23.8869	21	0	115.83	29.9534	32	Q8VEK3	Q8VEK3	Heterogeneous nuclear ribonucleoprotein U
Sdhb	23.8863	10	0	43.408	28.524	12	Q9CQA3	Q9CQA3	Succinate dehydrogenase [ubiquinone] iron-sulfur subunit, mitochondrial
Set	23.8833	8	0	83.925	28.3496	8	Q9EQU5;A2BE93;A2BE92	Q9EQU5;A2BE93;A2BE92	Protein SET
Tcp1	23.8752	30	0	126.46	29.7574	41	P11983;F2Z483	P11983	T-complex protein 1 subunit alpha
Stip1	23.874	25	0	147.63	30.2119	32	Q60864	Q60864	Stress-induced-phosphoprotein 1
Mapre1	23.8622	15	0	100.91	29.3584	26	Q61166;A0A0J9YVB9;D3Z6G3;Q6PER3	Q61166	Microtubule-associated protein RP/EB family member 1
Elavl1	23.8594	11	0	29.704	28.4166	11	P70372	P70372	ELAV-like protein 1
Pgam1	23.8577	12	0	116.48	29.8328	28	Q9DBJ1;O70250	Q9DBJ1	Phosphoglycerate mutase 1
Rps6	23.8573	6	0	21.888	28.6647	7	P62754	P62754	40S ribosomal protein S6
Hk1	23.8536	36	0	154.94	30.1465	52	G3UVV4;P17710;D3YYR4;D3Z365;Q91W97;E9Q9M6;B4YB29	G3UVV4;P17710	Hexokinase;Hexokinase-1
Fabp5	23.8502	11	0	44.276	27.8999	12	Q05816	Q05816	Fatty acid-binding protein, epidermal
Ddost	23.8449	14	0	108.31	28.7232	21	O54734	O54734	Dolichyl-diphosphooligosaccharide--protein glycosyltransferase 48 kDa subunit
Vkorc1	23.8445	1	0	11.117	24.8446	1	Q9CRC0	Q9CRC0	Vitamin K epoxide reductase complex subunit 1
Atp6v1b2	23.8437	22	0	109.11	29.5023	44	P62814;Q91YH6;A0A0U1RNU9	P62814	V-type proton ATPase subunit B, brain isoform
Iqgap1	23.8363	76	0	323.31	31.2116	115	Q9JKF1;A0A0U1RNG5;A0A0U1RPI2;A0A0U1RPU3;Q3UQP1;F8VQ29	Q9JKF1	Ras GTPase-activating-like protein IQGAP1
Mtpn	23.8358	5	0	34.995	27.0069	9	P62774;A0A0J9YV46	P62774	Myotrophin
Coro1c	23.8352	15	0	40.447	29.0446	25	Q9WUM4;E9PX03;E9PZJ0;E9PVJ1;B9EIZ7;Q920M5	Q9WUM4	Coronin-1C
Igkv1-110;Igkv1-35;Igkv1-99;Igkv1-115	23.8329	1	0	3.4552	26.1548	1	A0A140T8M9;A0A140T8M0;A0A0B4J1I0;A0A075B5N0;A0A075B5K8;F6XWB2;A0A140T8N1;A0A0G2JDE5;P01631	A0A140T8M9;A0A140T8M0;A0A0B4J1I0;A0A075B5N0;A0A075B5K8;F6XWB2;A0A140T8N1;A0A0G2JDE5;P01631	Ig kappa chain V-II region 26-10
Cd44	23.8329	4	0	17.283	28.0299	7	Q3U8S1;A2APM5;A2APM3;A2APM4;E9QKM8;Q80X37;A2APM1;A2APM2;P15379	Q3U8S1;A2APM5;A2APM3;A2APM4;E9QKM8;Q80X37;A2APM1;A2APM2;P15379	CD44 antigen
Fech	23.8314	17	0	92.627	29.5634	31	A0A494BAI5;Q544X6;P22315;F6T2S0;Q91W09	A0A494BAI5;Q544X6;P22315;F6T2S0;Q91W09	Ferrochelatase;Ferrochelatase, mitochondrial
Gp9	23.8239	5	0	50.323	29.5832	16	O88186	O88186	Platelet glycoprotein IX
Rpn1	23.8223	27	0	97.696	29.8395	32	Q91YQ5;A0A0N4SUJ8	Q91YQ5	Dolichyl-diphosphooligosaccharide--protein glycosyltransferase subunit 1
C1qa	23.8184	5	0	24.396	29.0289	6	P98086	P98086	Complement C1q subcomponent subunit A
Aldh9a1	23.8084	25	0	84.476	29.4636	31	Q9JLJ2;Q3U367	Q9JLJ2;Q3U367	4-trimethylaminobutyraldehyde dehydrogenase
Rab2a;Rab2b	23.8078	11	0	64.544	27.8946	13	P53994;Q3TEG7;P59279;G3UXQ7;G3V022;A0A1D5RMH1	P53994;Q3TEG7;P59279	Ras-related protein Rab-2A;Ras-related protein Rab-2B
Ppt1	23.8051	10	0	50.43	28.9562	16	O88531;B1B0P8;B1B0P9	O88531;B1B0P8;B1B0P9	Palmitoyl-protein thioesterase 1
Rnh1	23.8043	22	0	170.13	29.2285	35	Q91VI7;A0A1B0GSG5;A0A1B0GRG4;A0A1B0GRY7	Q91VI7;A0A1B0GSG5	Ribonuclease inhibitor
Bcat2	23.8028	14	0	75.304	29.4657	20	O35855;O88374;A0A1B0GX27;A0A1B0GST1;A0A1B0GQY4	O35855;O88374;A0A1B0GX27	Branched-chain-amino-acid aminotransferase, mitochondrial;Branched-chain-amino-acid aminotransferase
Tpm3-rs7;Tpm3	23.8025	4	0	11.442	28.7368	12	D3Z2H9;E9Q5J9;D3YVR0	D3Z2H9;E9Q5J9
Slpi	23.7969	2	0	4.3088	26.6043	2	E9Q748;P97430	E9Q748;P97430	Antileukoproteinase
Ndufs5	23.7918	4	0	15.569	26.8526	5	B1ARW4;Q99LY9	B1ARW4;Q99LY9	NADH dehydrogenase [ubiquinone] iron-sulfur protein 5;NADH dehydrogenase [ubiquinone] iron-sulfur protein 5, N-terminally processed
Dusp3	23.7915	5	0	55.017	28.1835	9	B1AQF4;Q9D7X3;H3BKL8;Q3V2Y9;H3BKD1	B1AQF4;Q9D7X3;H3BKL8;Q3V2Y9	Dual specificity protein phosphatase 3
Mp68	23.7909	1	0.00030239	2.5144	25.3759	3	A0A1Y7VLP0;P56379	A0A1Y7VLP0;P56379	6.8 kDa mitochondrial proteolipid
Snrpd3	23.7843	3	0	28.941	27.1992	5	P62320;A0A1W2P7K5	P62320	Small nuclear ribonucleoprotein Sm D3
Hcls1	23.7833	12	0	57.415	29.3886	22	P49710;E9Q4E5	P49710	Hematopoietic lineage cell-specific protein
Serpinb6;Serpinb6a	23.7708	14	0	61.191	28.6149	19	Q60854;F8WIV2;K7E6F1;E9Q108;E9Q0P9;E9PYY0;E9Q3Y1;E9Q6X2;E9PZQ9;E9Q4R2;E9Q5Q5;Q3UWK8	Q60854;F8WIV2;K7E6F1	Serpin B6
Cyc1	23.7652	8	0	51.844	28.934	18	Q9D0M3;A0A2R8VHK1	Q9D0M3;A0A2R8VHK1	Cytochrome c1, heme protein, mitochondrial
Ebp	23.7618	1	0	8.5327	25.3468	1	A2AC29;P70245	A2AC29;P70245	3-beta-hydroxysteroid-Delta(8),Delta(7)-isomerase
Echs1	23.7602	6	0	42.426	28.2991	7	Q8BH95	Q8BH95	Enoyl-CoA hydratase, mitochondrial
Fam49b	23.7581	13	0	106.05	29.0703	20	Q921M7;A0A2I3BRN5;A0A2I3BPH9;A0A2I3BQK1	Q921M7;A0A2I3BRN5	Protein FAM49B
Psma5	23.757	8	0	128.71	28.9722	12	Q9Z2U1;A0A0G2JF97	Q9Z2U1	Proteasome subunit alpha type-5
Dars	23.7447	23	0	69.066	29.7791	24	Q922B2;Q8BJY7	Q922B2	Aspartate--tRNA ligase, cytoplasmic
Samhd1	23.7429	32	0	133.61	30.3633	45	Q60710	Q60710	Deoxynucleoside triphosphate triphosphohydrolase SAMHD1
Rpl19	23.741	4	0	13.935	26.5926	4	A2A547;P84099	A2A547;P84099	Ribosomal protein L19;60S ribosomal protein L19
Ndufb3	23.7407	4	0	10.63	26.4087	6	Q9CQZ6	Q9CQZ6	NADH dehydrogenase [ubiquinone] 1 beta subcomplex subunit 3
Ranbp1	23.7389	6	0	26.879	27.4036	7	P34022;H7BX22	P34022;H7BX22	Ran-specific GTPase-activating protein
Smim1	23.7329	1	0	6.8502	23.7329	2	S4R191;S4R1P3;S4R2T3;P0C8K7	S4R191;S4R1P3;S4R2T3;P0C8K7	Small integral membrane protein 1
Rpl32	23.7325	5	0	20.736	27.9879	4	P62911	P62911	60S ribosomal protein L32
Tuba1a	23.7242	3	0	18.814	28.2268	9	P68369	P68369	Tubulin alpha-1A chain
Ppp2r1a	23.7126	26	0	137.97	29.5213	45	Q76MZ3;G3UWL2;H3BK50;G3UXQ1;H3BJ83	Q76MZ3	Serine/threonine-protein phosphatase 2A 65 kDa regulatory subunit A alpha isoform
Ybx1	23.709	10	0	101.49	29.1282	16	P62960;A2BGG7;A0A0A0MQD2;B2RUF0;Q9Z2C8	P62960;A2BGG7	Nuclease-sensitive element-binding protein 1
Skap2	23.7083	16	0	65.394	28.7914	22	Q3UND0;A0A0N4SVW8	Q3UND0	Src kinase-associated phosphoprotein 2
2002-09-01	23.706	13	0	81.025	29.2288	21	P42208;E9Q3V6;F6WYM0;D3YYB1;D3Z3C0;D3Z1S1;F6UKN5;D3YZU7;D3YV76	P42208;E9Q3V6;F6WYM0;D3YYB1;D3Z3C0	Septin-2
Gstp1;Gstp2	23.7017	12	0	98.995	29.9117	22	P19157;A0A494BAW2;A0A494B908;P46425;A0A494BAS3;A0A494BAU3;A0A494BAM8;Q8VC73;F6RWR5	P19157;A0A494BAW2;A0A494B908;P46425	Glutathione S-transferase P 1;Glutathione S-transferase P 2
Tgfb1	23.6951	13	0	75.477	28.9019	18	P04202	P04202	Transforming growth factor beta-1;Latency-associated peptide
Impa1	23.6896	14	0	39.067	28.2511	15	Q924B0;O55023;Q80ZJ2;A0A0A6YW07;D3Z703	Q924B0;O55023;Q80ZJ2	Inositol monophosphatase 1
Ywhab	23.685	10	0	137.49	29.5396	22	Q9CQV8;A2A5N1	Q9CQV8;A2A5N1	14-3-3 protein beta/alpha;14-3-3 protein beta/alpha, N-terminally processed
Oat	23.6816	18	0	70.635	29.8154	33	P29758	P29758	Ornithine aminotransferase, mitochondrial
Atp6v1a	23.677	30	0	196.38	29.974	53	P50516;D3Z1B9;D3YWH3;D3YZ23	P50516	V-type proton ATPase catalytic subunit A
Gpi	23.6673	23	0	147.36	29.7529	45	P06745;A0A0U1RP97;CON__Q3ZBD7;A0A0U1RQ18;A0A0U1RQ72	P06745	Glucose-6-phosphate isomerase
Manf	23.6638	6	0	25.439	28.5461	9	Q80ZP8;Q3TMX5;Q9CXI5;F6USD5;F6T4L3;F7C1S6	Q80ZP8;Q3TMX5;Q9CXI5;F6USD5;F6T4L3	Mesencephalic astrocyte-derived neurotrophic factor
Rab14	23.6613	12	0	61.691	29.0891	18	Q91V41;Q50HX3;A0A2R8VHW9	Q91V41;Q50HX3	Ras-related protein Rab-14
Slc25a4	23.6581	10	0	45.918	28.6318	10	P48962;Q3V132	P48962	ADP/ATP translocase 1
B2m	23.6561	3	0	6.2366	27.5348	5	P01887	P01887	Beta-2-microglobulin
Pgd	23.6557	17	0	86.258	29.163	26	Q9DCD0	Q9DCD0	6-phosphogluconate dehydrogenase, decarboxylating
G6b	23.6552	5	0	22.771	28.757	11	D7PDD4;D3YVS6	D7PDD4;D3YVS6
Tmed9	23.6532	6	0	22.626	27.5503	9	Q99KF1;A0A286YDS5	Q99KF1;A0A286YDS5	Transmembrane emp24 domain-containing protein 9
Ppp1ca	23.6508	21	0	95.942	29.3603	37	P62137;A0A0J9YUG2	P62137	Serine/threonine-protein phosphatase PP1-alpha catalytic subunit
Pdha1	23.6477	13	0	34.233	28.4398	15	P35486	P35486	Pyruvate dehydrogenase E1 component subunit alpha, somatic form, mitochondrial
Rpl10;Rpl10l	23.6469	6	0	40.64	28.0802	12	I7HLV2;Q6ZWV3;P86048;A0A1B0GXC3	I7HLV2;Q6ZWV3;P86048	60S ribosomal protein L10;60S ribosomal protein L10-like
Cat	23.6443	23	0	125.74	30.2092	35	P24270;A2AL20	P24270	Catalase
Dlst	23.6393	11	0	47.618	28.5171	16	Q9D2G2	Q9D2G2	Dihydrolipoyllysine-residue succinyltransferase component of 2-oxoglutarate dehydrogenase complex, mitochondrial
Srsf2	23.6367	3	0	20.427	26.8066	3	Q62093	Q62093	Serine/arginine-rich splicing factor 2
Lap3	23.6317	24	0	155.66	29.5775	39	Q9CPY7;A0A0G2JEM7	Q9CPY7	Cytosol aminopeptidase
Glrx	23.6302	5	0	16.535	27.2063	6	Q9QUH0;A0A1Y7VM65	Q9QUH0;A0A1Y7VM65	Glutaredoxin-1
Cox5a	23.6299	6	0	19.417	27.4292	8	P12787	P12787	Cytochrome c oxidase subunit 5A, mitochondrial
Pabpc1;Pabpc6	23.6227	21	0	96.071	29.6365	29	P29341;Q9D4E6;Q62029;A0A2I3BR37;F6ZAX1;V9GXG3;A2A5N3	P29341;Q9D4E6	Polyadenylate-binding protein 1;Polyadenylate-binding protein
Hnrnpf	23.6057	12	0	65.624	28.9901	22	Q9Z2X1;J3QM80;J3QMT0;J3QP45;J3QNH2;J3QMV8	Q9Z2X1;J3QM80;J3QMT0	Heterogeneous nuclear ribonucleoprotein F;Heterogeneous nuclear ribonucleoprotein F, N-terminally processed
Igtp	23.6003	19	0	126.72	29.2604	27	Q9DCE9;E9PW35;E9Q9N8	Q9DCE9
Clic4	23.5935	12	0	136.01	29.073	28	Q9QYB1	Q9QYB1	Chloride intracellular channel protein 4
Tf	23.5744	36	0	211.91	30.4777	51	Q921I1;D3YYR8;F7CJN9;F7BAE9;E9Q2Q7;E9Q939;CON__Q29443;CON__Q0IIK2;CON__Q2HJF0	Q921I1	Serotransferrin
Nap1l4	23.5663	15	0	77.128	28.7242	24	B7ZNL2;Q78ZA7;A0A140LJB5;A0A140LJ37;A0A140LI78	B7ZNL2;Q78ZA7;A0A140LJB5	Nucleosome assembly protein 1-like 4
Eif2s3x;Eif2s3y	23.5657	17	0	77.982	29.5779	21	Q9Z0N1;A2AAW9;Q9Z0N2	Q9Z0N1;A2AAW9;Q9Z0N2	Eukaryotic translation initiation factor 2 subunit 3, X-linked;Eukaryotic translation initiation factor 2 subunit 3, Y-linked
Ndufa13	23.565	4	0	6.5857	26.565	5	Q9ERS2	Q9ERS2	NADH dehydrogenase [ubiquinone] 1 alpha subcomplex subunit 13
Lasp1	23.5608	7	0	28.422	27.5018	9	Q61792;A2A6G9;A2A6H0;A2A6G6;A2A6G7;A2A6G8;A2A6H1;A2A6G5;E9Q0N6;A2A6G4	Q61792;A2A6G9;A2A6H0;A2A6G6;A2A6G7;A2A6G8;A2A6H1	LIM and SH3 domain protein 1
Ahcy	23.5375	16	0	82.149	29.0882	21	P50247;A2ALT5	P50247	Adenosylhomocysteinase
Atp1a1	23.5371	24	0	201.87	29.49	32	Q8VDN2;D3YYN7;A0A0G2JGX4;Q8VCE0;Q6PIC6;Q6PIE5;Q9WV27;Q91WH7;E9QNX7;Q64436;Q9Z1W8	Q8VDN2	Sodium/potassium-transporting ATPase subunit alpha-1
Grb2	23.5343	11	0	31.999	28.0533	14	Q60631;B1AT92;B1AT95	Q60631;B1AT92	Growth factor receptor-bound protein 2
Mpo	23.5329	23	0	82.763	29.2043	26	P11247;F7DC05	P11247	Myeloperoxidase;Myeloperoxidase light chain;Myeloperoxidase heavy chain
Syncrip	23.5305	17	0	85.631	28.9696	26	A0A0R4J259;G3UZI2;Q7TMK9;G3V018;G3UZ48;G3UXJ6;G3UWM1;G3XA76;G3UY67;G3UYK7	A0A0R4J259;G3UZI2;Q7TMK9;G3V018;G3UZ48;G3UXJ6	Heterogeneous nuclear ribonucleoprotein Q
Sh3bgrl	23.5301	6	0	20.763	27.3264	8	Q9JJU8	Q9JJU8	SH3 domain-binding glutamic acid-rich-like protein
Tbxas1	23.5224	18	0	64.943	29.5057	28	P36423;F6SG79;Q3TRY5	P36423	Thromboxane-A synthase
2011-09-01	23.5215	17	0	115.72	29.1043	24	A0A0J9YTY0;A0A0J9YUL3;Q8C1B7;A0A0J9YUV6;A0A0J9YVA6	A0A0J9YTY0;A0A0J9YUL3;Q8C1B7	Septin-11
Snrpd2	23.5201	5	0	14.504	26.6115	7	P62317	P62317	Small nuclear ribonucleoprotein Sm D2
Arl6ip5	23.5026	5	0	13.684	26.6502	8	Q8R5J9	Q8R5J9	PRA1 family protein 3
Psma3	23.5005	8	0	17.727	27.7436	11	O70435;E0CX62;E0CZ34;F8WH02;E0CYL6	O70435	Proteasome subunit alpha type-3
Srsf5	23.4959	4	0	10.043	26.6389	2	Q9D8S5;O35326;Q542V3;Q8VE97	Q9D8S5;O35326	Serine/arginine-rich splicing factor 5
Pgls	23.4725	11	0	93.472	28.4567	16	Q9CQ60;Q8CBG6;D3Z4X1;F6X8L5	Q9CQ60;Q8CBG6;D3Z4X1	6-phosphogluconolactonase
Psmb1	23.4718	8	0	26.593	28.3189	12	O09061;A0A338P7C0;A0A338P7F1	O09061;A0A338P7C0;A0A338P7F1	Proteasome subunit beta type-1
Ear6	23.4591	5	0	17.709	26.733	6	Q923L7	Q923L7
Spcs1	23.4575	3	0	7.0403	26.8608	4	A0A2I3BRW0;Q9D958;A0A2I3BQG3	A0A2I3BRW0;Q9D958	Signal peptidase complex subunit 1
Pde5a	23.4566	39	0	166.46	30.182	56	Q8CG03;A0A0G2JF67	Q8CG03;A0A0G2JF67	cGMP-specific 3,5-cyclic phosphodiesterase
Rab32	23.4491	14	0	117.05	27.7689	19	Q9CZE3;A0A1Y7VIZ0;E9QLQ7;Q91YQ1	Q9CZE3	Ras-related protein Rab-32
Pttg1ip	23.4478	3	0	3.9981	26.0328	4	Q8R143;E0CXB5;F6TFF2	Q8R143;E0CXB5	Pituitary tumor-transforming gene 1 protein-interacting protein
Bsg	23.4459	8	0	48.192	28.4631	11	P18572;K3W4Q8;J3QP71	P18572;K3W4Q8;J3QP71	Basigin
Hmgb3	23.4375	5	0	16.109	26.5421	5	A2AP78;O54879	A2AP78;O54879	High mobility group protein B3
Suclg1	23.4366	8	0	120.04	27.5539	11	Q9WUM5;A0A0N4SVU4	Q9WUM5	Succinyl-CoA ligase [ADP/GDP-forming] subunit alpha, mitochondrial
Hprt1	23.4349	10	0	45.897	27.9589	14	P00493	P00493	Hypoxanthine-guanine phosphoribosyltransferase
Ehd1	23.433	32	0	134.58	29.4898	44	Q9WVK4;Q8BH64	Q9WVK4	EH domain-containing protein 1
Uqcr11	23.4315	1	0.00030713	2.6793	24.4315	2	Q9CPX8	Q9CPX8	Cytochrome b-c1 complex subunit 10
Prkcsh	23.4298	9	0	46.706	28.1952	11	O08795;A0A1L1ST83	O08795	Glucosidase 2 subunit beta
Fh	23.4292	18	0	89.516	29.2156	41	P97807;H3BKG7	P97807	Fumarate hydratase, mitochondrial
Rpn2	23.428	19	0	119.6	29.2634	26	Q9DBG6;A2ACG7	Q9DBG6;A2ACG7	Dolichyl-diphosphooligosaccharide--protein glycosyltransferase subunit 2
Rpl3	23.427	13	0	48.006	29.2305	23	P27659;A0A087WNS0;A0A087WQK0;A0A2R8VHN4;Q9CQ09;E9PWZ3	P27659	60S ribosomal protein L3
Psmb3	23.412	6	0	22.092	26.9006	9	Q9R1P1	Q9R1P1	Proteasome subunit beta type-3
Rab8a	23.4105	5	0	10.281	27.1265	5	P55258	P55258	Ras-related protein Rab-8A
Pgrmc1	23.4037	7	0	35.327	26.9331	7	O55022	O55022	Membrane-associated progesterone receptor component 1
Anp32b	23.4018	3	0	15.435	27.8283	5	Q9EST5	Q9EST5	Acidic leucine-rich nuclear phosphoprotein 32 family member B
C1qc	23.4011	4	0	11.673	27.1788	4	Q02105	Q02105	Complement C1q subcomponent subunit C
Dad1	23.4005	3	0	7.0677	25.7224	2	P61804	P61804	Dolichyl-diphosphooligosaccharide--protein glycosyltransferase subunit DAD1
Cps1	23.3911	55	0	221.22	30.3035	73	Q8C196	Q8C196	Carbamoyl-phosphate synthase [ammonia], mitochondrial
Cnpy2	23.384	6	0	22.487	26.8709	8	A0A1W2P729;Q9QXT0	A0A1W2P729;Q9QXT0	Protein canopy homolog 2
Rab18	23.3832	9	0	43.788	27.1939	9	P35293;A0A3Q4EI12;A0A452J8C1;A0A3Q4EIF7	P35293;A0A3Q4EI12;A0A452J8C1	Ras-related protein Rab-18
Qil1	23.3795	3	0	4.1849	25.1321	3	Q8R404	Q8R404	Protein QIL1
Psmc6	23.3684	14	0	39.381	28.1653	15	P62334	P62334	26S protease regulatory subunit 10B
Hnrnpa1	23.3675	12	0	53.735	28.9076	17	Q5EBP8;P49312	Q5EBP8;P49312	Heterogeneous nuclear ribonucleoprotein A1;Heterogeneous nuclear ribonucleoprotein A1, N-terminally processed
Lamp1	23.3633	4	0	18.789	27.5638	6	P11438	P11438	Lysosome-associated membrane glycoprotein 1
Psap	23.3613	9	0	24.682	28.5471	11	E9PZ00;Q8BFQ1;K3W4L3;J3QPG5;Q61207	E9PZ00;Q8BFQ1;K3W4L3;J3QPG5;Q61207	Prosaposin
Gmfg	23.3546	10	0	62.267	27.0002	12	Q9ERL7;D3Z2F6;D3YY16	Q9ERL7;D3Z2F6;D3YY16	Glia maturation factor gamma
Ube2i	23.3435	7	0	22.738	27.1949	9	P63280;Q8CFZ0;G3UYP0;G3UZL6	P63280;Q8CFZ0;G3UYP0	SUMO-conjugating enzyme UBC9
Naga	23.3381	12	0	42.792	28.2465	19	Q9QWR8;A0A2R8VHC0;Q3UZX5;A0A2R8VHH9;A0A2R8VHU7;A0A2R8VHJ3;A0A2R8W742	Q9QWR8;A0A2R8VHC0;Q3UZX5;A0A2R8VHH9	Alpha-N-acetylgalactosaminidase
	23.3318	3	0	7.1494	26.5684	3	P0DN34	P0DN34
Itgb1	23.3309	19	0	150.89	29.8481	35	P09055	P09055	Integrin beta-1
Ndufv1	23.3301	20	0	53.299	28.6439	22	D3YUM1;Q91YT0;D3Z1U9;D3Z0K1;D3YXX5;A0A494BAS8;D6RG60;A0A494BA02	D3YUM1;Q91YT0;D3Z1U9	NADH dehydrogenase [ubiquinone] flavoprotein 1, mitochondrial
Isg15	23.3206	5	0	9.046	27.2503	7	Q64339	Q64339	Ubiquitin-like protein ISG15
	23.3193	1	0	6.5151	25.6413	3	Q91WE4	Q91WE4	UPF0729 protein C18orf32 homolog
Dctn2	23.3152	13	0	46.862	28.0309	13	Q99KJ8	Q99KJ8	Dynactin subunit 2
Rps21	23.3113	4	0	25.361	26.0448	5	Q9CQR2	Q9CQR2	40S ribosomal protein S21
Aif1	23.3083	5	0	22.128	27.3841	6	O70200;G3UYJ2	O70200;G3UYJ2	Allograft inflammatory factor 1
Naaa	23.2971	10	0	26.912	28.642	14	Q9D7V9;G3XA18;H3BL13	Q9D7V9;G3XA18;H3BL13	N-acylethanolamine-hydrolyzing acid amidase;N-acylethanolamine-hydrolyzing acid amidase subunit alpha;N-acylethanolamine-hydrolyzing acid amidase subunit beta
Rbx1	23.2963	2	0	16.423	24.2962	2	A0A2R8W6R3;P62878	A0A2R8W6R3;P62878	E3 ubiquitin-protein ligase RBX1;E3 ubiquitin-protein ligase RBX1, N-terminally processed
Eci1	23.2939	9	0	33.951	28.5397	11	P42125;A0A3Q4EC00;A0A452J8A5;A0A3Q4EC76	P42125;A0A3Q4EC00;A0A452J8A5	Enoyl-CoA delta isomerase 1, mitochondrial
Gcat	23.2893	10	0	44.013	27.5647	12	O88986;E9PWY6;A0A2R8VHE4	O88986;E9PWY6;A0A2R8VHE4	2-amino-3-ketobutyrate coenzyme A ligase, mitochondrial
Slc16a1	23.2874	3	0	32.609	27.6151	4	P53986	P53986	Monocarboxylate transporter 1
Nap1l1	23.2842	12	0	75.291	28.4432	20	Q3TF41;Q8BSH9;P28656	Q3TF41;Q8BSH9;P28656	Nucleosome assembly protein 1-like 1
Dut	23.2825	5	0	28.942	26.6044	6	Q9CQ43;Q8VCG1	Q9CQ43;Q8VCG1
Lgals3	23.2811	5	0	20.834	29.1275	8	Q8C253;P16110	Q8C253;P16110	Galectin;Galectin-3
Dpysl2	23.2797	23	0	108.07	29.224	30	O08553;Q3TT92;E9PWE8;Q62188;Q6P1J1;P97427	O08553	Dihydropyrimidinase-related protein 2
Snrpe	23.2734	3	0	9.8594	25.491	6	P62305;E9Q4F4;E9Q0W8	P62305;E9Q4F4	Small nuclear ribonucleoprotein E
Ndufs1	23.2634	26	0	96.157	29.3039	34	Q91VD9;A0A087WQ77;A0A087WSU3;A0A087WQR0;A0A087WR47;A0A087WP77	Q91VD9	NADH-ubiquinone oxidoreductase 75 kDa subunit, mitochondrial
Napa	23.2607	14	0	66.398	28.4301	17	Q9DB05;P28663;A0A1B0GR35	Q9DB05	Alpha-soluble NSF attachment protein
Erp44	23.26	12	0	41.084	28.7344	17	Q9D1Q6	Q9D1Q6	Endoplasmic reticulum resident protein 44
Api5	23.258	10	0	24.946	28.0221	10	O35841	O35841	Apoptosis inhibitor 5
Uqcrfs1	23.2578	12	0	93.327	28.7127	17	Q9CR68	Q9CR68	Cytochrome b-c1 complex subunit Rieske, mitochondrial;Cytochrome b-c1 complex subunit 11
Snap23	23.2544	9	0	79.595	28.1734	14	Q9D3L3;O09044;B0R030;B0R029;E9Q8A1;P60879	Q9D3L3;O09044;B0R030;B0R029;E9Q8A1	Synaptosomal-associated protein;Synaptosomal-associated protein 23
2007-09-01	23.2534	17	0	139.39	29.2865	24	E9Q9F5;E9Q1G8;O55131;A0A0R4J233;S4R2P6;A0A1W2P6J7;Q9DA97;Q8C650	E9Q9F5;E9Q1G8;O55131	Septin-7
	23.2447	7	0	60.627	29.0279	13	P0DP28;P0DP27;P0DP26;A0A3Q4EHJ0;A0A1Y7VK66;Q9D6P8;G3UX57	P0DP28;P0DP27;P0DP26;A0A3Q4EHJ0
Snx2	23.242	18	0	74.876	28.3943	19	Q9CWK8	Q9CWK8	Sorting nexin-2
Rab10	23.2407	7	0	28.652	27.6852	10	P61027	P61027	Ras-related protein Rab-10
Gypc	23.2403	2	0	12.52	24.8253	2	F7D1I5;G3UXY6;Q78HU7	F7D1I5;G3UXY6;Q78HU7	Glycophorin-C
Pls1	23.2362	25	0	116.36	29.7467	30	Q3V0K9;D3Z6J7	Q3V0K9	Plastin-1
Glrx5	23.2253	3	0	9.0334	26.0327	3	A0A1Y7VN70;Q80Y14	A0A1Y7VN70;Q80Y14	Glutaredoxin-related protein 5, mitochondrial
Tpd52l2	23.2237	6	0	14.658	27.8774	6	Q3TUJ9;Q8BKP1;Q3TAI4;A2AUD5;Q9CYZ2;F6VQ81;V9GWU5	Q3TUJ9;Q8BKP1;Q3TAI4;A2AUD5;Q9CYZ2;F6VQ81;V9GWU5	Tumor protein D54
Tmx1	23.2176	4	0	8.4847	27.0487	4	Q8VBT0;F6V084	Q8VBT0;F6V084	Thioredoxin-related transmembrane protein 1
Ogdh	23.214	42	0	169.64	30.2483	64	Q60597;B2RXT3;E9Q7L0;Q5SVY0;Q5SVY1	Q60597	2-oxoglutarate dehydrogenase, mitochondrial
Npm1	23.2112	8	0	43.869	29.2646	25	Q5SQB0;Q61937;Q9DAY9;Q5SQB5	Q5SQB0;Q61937;Q9DAY9;Q5SQB5	Nucleophosmin
Fus	23.205	8	0	44.503	27.6854	11	Q8CFQ9;P56959;G3UXT7;G3UZD2;Q91VQ2	Q8CFQ9;P56959;G3UXT7	RNA-binding protein FUS
Cdc37	23.2021	8	0	24.711	27.5135	10	Q61081;A0A1L1STC0	Q61081	Hsp90 co-chaperone Cdc37;Hsp90 co-chaperone Cdc37, N-terminally processed
Lipa	23.2013	10	0	81.658	28.2903	16	Q9Z0M5	Q9Z0M5	Lysosomal acid lipase/cholesteryl ester hydrolase
Bax	23.2008	3	0	13.98	25.7857	6	A0A1B0GS13;A0A1B0GT81;A0A1B0GTA4;Q07813;A0A1B0GSH8	A0A1B0GS13;A0A1B0GT81;A0A1B0GTA4;Q07813	Apoptosis regulator BAX
Pcbp2	23.199	8	0	62.341	27.9024	12	B2M1R7;A0A2R8VI25;A0A2R8VHG2;A0A2R8W6L5;A0A2R8VHZ0;Q3TT81;A0A2R8VJY1;A0A2R8VI12;A0A2R8VI71;A0A2R8VHY9;A0A2R8VKN0;A0A2R8VI73;A0A2R8VHN3;A0A2R8VKF0;A0A2R8VHL8;A0A2R8W6U6;P57722;E9Q7D8;A0A2R8VI92;A0A2R8VHI3;A0A2R8W6H3;G3UYM5	B2M1R7;A0A2R8VI25;A0A2R8VHG2;A0A2R8W6L5;A0A2R8VHZ0;Q3TT81;A0A2R8VJY1;A0A2R8VI12;A0A2R8VI71;A0A2R8VHY9;A0A2R8VKN0;A0A2R8VI73;A0A2R8VHN3;A0A2R8VKF0;A0A2R8VHL8
Snx3	23.1976	7	0	14.827	26.7706	8	Q78ZM0;O70492;D3Z789;D3Z6Z0	Q78ZM0;O70492;D3Z789;D3Z6Z0	Sorting nexin-3
Ttr	23.1918	4	0	28.495	27.1425	5	P07309	P07309	Transthyretin
Lgals1	23.1909	4	0	42.288	28.5494	7	P16045;A0A2R8VHJ0	P16045	Galectin-1
Psmb6	23.1894	6	0	23.185	27.1898	7	Q60692	Q60692	Proteasome subunit beta type-6
Hnrnpc	23.1767	11	0	31.681	27.7084	13	Q9Z204;A0A2I3BRM6;A0A2I3BQH3	Q9Z204;A0A2I3BRM6	Heterogeneous nuclear ribonucleoproteins C1/C2
Dnpep	23.1671	17	0	71.17	28.7002	19	Q3TVK3;Q9Z2W0;Q8BPW9;A0A087WS31;A0A087WSE6;A0A087WRC1;A0A087WNX3;A0A087WSD3;A0A087WSU0	Q3TVK3;Q9Z2W0;Q8BPW9;A0A087WS31;A0A087WSE6	Aspartyl aminopeptidase
Tubb2a	23.1615	7	0	85.781	28.7252	17	Q7TMM9	Q7TMM9	Tubulin beta-2A chain
Psmb8	23.155	9	0	32.734	27.9402	11	P28063;G3UZW8;A0A494BAB6	P28063;G3UZW8	Proteasome subunit beta type-8;Proteasome subunit beta type
Ndufs3	23.1526	9	0	35.266	27.5577	11	Q9DCT2	Q9DCT2	NADH dehydrogenase [ubiquinone] iron-sulfur protein 3, mitochondrial
Snrpf	23.1508	3	0	14.314	26.0138	5	P62307	P62307	Small nuclear ribonucleoprotein F
Gnb1	23.1452	10	0	68.213	28.6373	14	P62874;H3BKR2;H3BLF7	P62874;H3BKR2	Guanine nucleotide-binding protein G(I)/G(S)/G(T) subunit beta-1
Hexa	23.1345	16	0	63.025	29.1651	26	P29416	P29416	Beta-hexosaminidase subunit alpha
Immt	23.1325	24	0	118.1	29.4429	30	Q8CAQ8;E9Q800;E9QAY6;A0A0U1RQ14	Q8CAQ8;E9Q800;E9QAY6	MICOS complex subunit Mic60
Psmg2	23.1257	2	0	3.6217	26.7107	2	Q9EST4;REV__A0A0A6YWX5	Q9EST4;REV__A0A0A6YWX5	Proteasome assembly chaperone 2
Prss34	23.125	7	0	24.155	27.8064	10	Q80UR4	Q80UR4
Try4;Try5	23.1187	4	0	13.565	27.2712	4	Q9R0T7;Q9QUK9;G3UXD0	Q9R0T7;Q9QUK9;G3UXD0
Tmpo	23.1183	17	0	52.305	29.0117	16	Q61033	Q61033	Lamina-associated polypeptide 2, isoforms alpha/zeta
Dynll1;BC048507	23.1162	2	0	8.6101	27.3097	4	P63168;Q80ZS7	P63168;Q80ZS7	Dynein light chain 1, cytoplasmic
Mlec	23.1134	10	0	54.782	28.3698	15	Q6ZQI3	Q6ZQI3	Malectin
Lta4h	23.1104	18	0	90.242	28.8915	21	P24527	P24527	Leukotriene A-4 hydrolase
Sh3bgrl3	23.1094	4	0	29.648	28.9425	10	Q91VW3;I7HPY0	Q91VW3	SH3 domain-binding glutamic acid-rich-like protein 3
Prkar2b	23.1059	15	0	66.468	28.9403	23	P31324;H3BK84	P31324;H3BK84	cAMP-dependent protein kinase type II-beta regulatory subunit
Mthfd1	23.1058	31	0	83.786	29.3672	41	Q922D8;A0A1W2P733;A0A1W2P7L5	Q922D8;A0A1W2P733	C-1-tetrahydrofolate synthase, cytoplasmic;Methylenetetrahydrofolate dehydrogenase;Methenyltetrahydrofolate cyclohydrolase;Formyltetrahydrofolate synthetase;C-1-tetrahydrofolate synthase, cytoplasmic, N-terminally processed
Ndufb7	23.0998	6	0	18.295	27.1117	8	Q9CR61	Q9CR61	NADH dehydrogenase [ubiquinone] 1 beta subcomplex subunit 7
Ap2b1	23.0991	33	0	86.419	29.2434	41	Q9DBG3;H3BIY9;H3BKM0;H3BJ06;Q5SWR0	Q9DBG3;H3BIY9;H3BKM0	AP-2 complex subunit beta;AP complex subunit beta
Txn2	23.0979	4	0	19.733	25.4199	5	G3UZY2;P97493;G3UX99;A2A439	G3UZY2;P97493	Thioredoxin, mitochondrial
Creg1	23.0979	6	0	19.452	28.1602	13	O88668;K4DI63;J3QP41	O88668;K4DI63;J3QP41	Protein CREG1
Scp2	23.093	10	0	34.185	28.0852	14	P32020	P32020	Non-specific lipid-transfer protein
Rpl8	23.0928	8	0	57.559	27.831	11	P62918	P62918	60S ribosomal protein L8
Paics	23.0906	14	0	56.131	28.0015	18	Q9DCL9;D3Z6P1;D6RCU8	Q9DCL9	Multifunctional protein ADE2;Phosphoribosylaminoimidazole-succinocarboxamide synthase;Phosphoribosylaminoimidazole carboxylase
Hnrnpl	23.089	16	0	95.332	28.8711	19	G5E924;Q8R081;G3UY38;G3UY56;G3UYY3	G5E924;Q8R081;G3UY38	Heterogeneous nuclear ribonucleoprotein L
Pdcd10	23.087	5	0	20.742	27.3162	5	Q8VE70;F8WI55;E0CY82	Q8VE70;F8WI55	Programmed cell death protein 10
Pygb	23.0834	37	0	133.54	29.8498	52	Q8CI94	Q8CI94	Glycogen phosphorylase, brain form
Pak2	23.0827	16	0	94.839	28.3618	18	Q8CIN4;Q61036;A3KGC3;A3KGC4;A3KGC5	Q8CIN4	Serine/threonine-protein kinase PAK 2;PAK-2p27;PAK-2p34
Gclm	23.0811	6	0	44.797	27.8425	10	O09172;H3BJA3;A0A0G2JDI4;F6VNW5	O09172;H3BJA3;A0A0G2JDI4	Glutamate--cysteine ligase regulatory subunit
Me2	23.0785	23	0	108.56	29.1044	33	Q99KE1	Q99KE1	NAD-dependent malic enzyme, mitochondrial
Txndc5	23.0782	14	0	70.832	28.4099	20	Q91W90;E9PXX7;A0A0R4J1Y7	Q91W90;E9PXX7;A0A0R4J1Y7	Thioredoxin domain-containing protein 5
Tapbp	23.0769	12	0	85.579	28.7909	23	Q3TCU5;Q9R233;G3UZZ2;A0A3Q4EGL0	Q3TCU5;Q9R233	Tapasin
Ndufa2	23.0767	3	0	6.0386	26.4436	4	Q9CQ75	Q9CQ75	NADH dehydrogenase [ubiquinone] 1 alpha subcomplex subunit 2
Aifm1	23.0717	20	0	58.877	28.6224	25	B1AU25;Q9Z0X1	B1AU25;Q9Z0X1	Apoptosis-inducing factor 1, mitochondrial
Ank1	23.0708	71	0	323.31	31.0213	101	D3Z5M4;Q02357;A0A0R4J1N7;Q0VGY9;G8JL84;E9QNT8;B7ZW98;D3YTV8;G5E8J2;F7D1P5;G3UY11;D6RJ51;S4R2D6;W4VSQ0;S4R1I1;Q3UVY0;S4R229	D3Z5M4;Q02357;A0A0R4J1N7;Q0VGY9;G8JL84;E9QNT8;B7ZW98;D3YTV8;G5E8J2;F7D1P5	Ankyrin-1
Slc14a1	23.0665	5	0	7.8887	26.9608	6	Q8VHL0	Q8VHL0	Urea transporter 1
Cox6a1	23.0639	4	0	31.68	28.6216	13	Q9DCW5;P43024	Q9DCW5;P43024	Cytochrome c oxidase subunit 6A, mitochondrial;Cytochrome c oxidase subunit 6A1, mitochondrial
Ak3	23.0634	11	0	57.94	27.3731	13	Q9WTP7;F6RP11	Q9WTP7	GTP:AMP phosphotransferase AK3, mitochondrial
Galk1	23.0619	9	0	32.386	27.302	12	Q9R0N0	Q9R0N0	Galactokinase
F13a1	23.0571	20	0	64.468	28.953	26	Q8BH61	Q8BH61	Coagulation factor XIII A chain
Timm13	23.051	3	0	9.0817	25.636	4	P62075;A0A1W2P756;A0A1W2P7H2	P62075;A0A1W2P756	Mitochondrial import inner membrane translocase subunit Tim13
Ddx39b	23.0506	14	0	59.764	28.5189	21	Q9Z1N5;G3UXI6	Q9Z1N5	Spliceosome RNA helicase Ddx39b
Lbr	23.0375	11	0	43.429	28.4585	13	Q3U9G9;A0A0A6YXW3;A0A0A6YXT6;A0A0A6YW01;A0A0A6YY12;A0A0A6YWS3	Q3U9G9	Lamin-B receptor
Ly6e	23.0351	1	0	16.716	25.0351	1	A0A087WNS9;A0A087WQ65;A0A087WRZ2;A0A087WNT2;A0A087WPY4;Q64253	A0A087WNS9;A0A087WQ65;A0A087WRZ2;A0A087WNT2;A0A087WPY4;Q64253	Lymphocyte antigen 6E
Mapk1	23.035	14	0	56.378	28.7251	18	P63085;A0A338P736;A0A338P781	P63085	Mitogen-activated protein kinase 1
Tuba4a	23.0346	1	0	11.339	25.3565	1	A0A087WSL5	A0A087WSL5
Snrpa1	23.032	7	0	21.625	26.4432	9	P57784;G5E883;A0A0U1RNZ6	P57784	U2 small nuclear ribonucleoprotein A
Ndufb4	23.0289	6	0	14.15	27.7372	8	Q9CQC7	Q9CQC7	NADH dehydrogenase [ubiquinone] 1 beta subcomplex subunit 4
Cald1	23.028	17	0	54.586	29.7557	26	Q8VCQ8;E9QA16;E9Q0M9;D3Z6I7;E9QA15;S4R1T7;F6QLP8;F6ZAW1;E9Q9F3;F6RGN9;F6T2Z7	Q8VCQ8;E9QA16;E9Q0M9;D3Z6I7;E9QA15;S4R1T7
Eif5a	23.0142	16	0	136.46	30.4419	39	P63242;A0A0A0MQM0;J3QPS8;Q8BGY2	P63242;A0A0A0MQM0;J3QPS8	Eukaryotic translation initiation factor 5A-1;Eukaryotic translation initiation factor 5A
Dlat	23.0127	16	0	51.62	28.4833	22	Q8BMF4	Q8BMF4	Dihydrolipoyllysine-residue acetyltransferase component of pyruvate dehydrogenase complex, mitochondrial
Gpd2	23.0108	33	0	99.5	29.4385	46	A2AQR0;Q64521	A2AQR0;Q64521	Glycerol-3-phosphate dehydrogenase;Glycerol-3-phosphate dehydrogenase, mitochondrial
Slc3a2	23.0061	12	0	38.997	28.3007	14	P10852;A0A0U1RP98;A0A0U1RPK4;A0A0U1RPL8;A0A0U1RPG5;A0A0U1RP32;A0A0U1RPQ7	P10852;A0A0U1RP98	4F2 cell-surface antigen heavy chain
Actn4	23.0007	30	0	236.46	30.846	52	P57780;A0A1L1SV25;E9Q2W9;A0A1L1SVJ6	P57780;A0A1L1SV25;E9Q2W9	Alpha-actinin-4
Cd81	22.9967	2	0	9.9231	24.5816	2	A0A140LJL0;P35762	A0A140LJL0;P35762	CD81 antigen
H2-K1;H2-D1	22.9934	6	0	41.759	28.1304	11	Q3TH01;P01901;A0A494BA33;A0A494BAT0;P04223;G3UXW2;P14428;P14426;P03991;A0A0B4J1G3;A0A494B9G8;A0A494B9G2	Q3TH01;P01901;A0A494BA33;A0A494BAT0;P04223;G3UXW2;P14428;P14426;P03991	H-2 class I histocompatibility antigen, K-B alpha chain;H-2 class I histocompatibility antigen, K-K alpha chain;H-2 class I histocompatibility antigen, K-Q alpha chain;H-2 class I histocompatibility antigen, D-K alpha chain;H-2 class I histocompatibility antigen, K-W28 alpha chain
Gstm1	22.9911	10	0	25.115	27.5787	13	P10649;A2AE89;F6WHQ7;Q80W21;D3YX76;P15626;D3YVP5;D3YVP6;E9QAC8;Q8R5I6;D3YZ29;A2AE91;P19639;D3YVP9;D3YVP8;O35660;G5E8M7	P10649;A2AE89;F6WHQ7	Glutathione S-transferase Mu 1
Arl8a	22.9819	2	0	11.118	26.5305	4	F6QKK2;Q8VEH3	F6QKK2;Q8VEH3	ADP-ribosylation factor-like protein 8A
Rps15	22.9787	4	0	48.305	28.3728	21	P62843;D3YTQ9	P62843;D3YTQ9	40S ribosomal protein S15
M6pr	22.9786	6	0	31.372	27.9864	7	P24668	P24668	Cation-dependent mannose-6-phosphate receptor
Slc25a11	22.9772	12	0	28.726	27.4166	14	Q9CR62;Q5SX46;Q5SX48	Q9CR62;Q5SX46	Mitochondrial 2-oxoglutarate/malate carrier protein
F5	22.9745	44	0	192.11	30.1185	59	O88783	O88783	Coagulation factor V;Coagulation factor V heavy chain;Coagulation factor V light chain
Tmod3	22.9658	11	0	57.115	27.846	15	Q9JHJ0;A0A1L1SQ12;A0A1L1SR42;A0A1L1SU70;Q9JKK7	Q9JHJ0	Tropomodulin-3
Rpl37a	22.9619	3	0	19.672	25.662	4	P61514;A0A1D5RL86	P61514;A0A1D5RL86	60S ribosomal protein L37a
Crip2	22.9615	4	0	51.118	27.5872	7	Q9DCT8;A0A0G2JF37	Q9DCT8;A0A0G2JF37	Cysteine-rich protein 2
Pdcd6ip	22.9561	30	0	107.16	29.2244	40	Q9WU78	Q9WU78	Programmed cell death 6-interacting protein
Dbnl	22.9465	13	0	127.68	28.7073	20	Q62418	Q62418	Drebrin-like protein
Nsf	22.94	25	0	94.9	29.7085	28	P46460;G3UX86;G3UX98	P46460	Vesicle-fusing ATPase
Anp32e	22.937	5	0	31.969	26.4772	7	E9Q5H2;E9PZF5;P97822;E9Q0X5	E9Q5H2;E9PZF5;P97822	Acidic leucine-rich nuclear phosphoprotein 32 family member E
Bcap31	22.9332	3	0	34.19	27.4937	9	Q61335	Q61335	B-cell receptor-associated protein 31
Snd1	22.9329	43	0	212.18	29.9136	52	Q78PY7;Q3TJ56;E9Q3E9	Q78PY7;Q3TJ56	Staphylococcal nuclease domain-containing protein 1
Sucla2	22.9329	13	0	43.005	27.9916	15	Q9Z2I9	Q9Z2I9	Succinyl-CoA ligase [ADP-forming] subunit beta, mitochondrial
Oxct1	22.9315	15	0	80.309	28.59	26	Q9D0K2;Q3UJQ9	Q9D0K2;Q3UJQ9	Succinyl-CoA:3-ketoacid coenzyme A transferase 1, mitochondrial;Succinyl-CoA:3-ketoacid-coenzyme A transferase
Mthfd1l	22.9251	34	0	130.2	29.5064	47	Q3V3R1	Q3V3R1	Monofunctional C1-tetrahydrofolate synthase, mitochondrial
Ptbp1	22.9229	13	0	59.882	28.6828	17	Q8BGJ5;Q922I7;Q8CB58;P17225;E9QMW9;F7DCW4;E9Q279;F7AXP1;E9Q0W3	Q8BGJ5;Q922I7;Q8CB58;P17225;E9QMW9	Polypyrimidine tract-binding protein 1
Ndufa8	22.9173	9	0	26.965	28.1499	11	Q9DCJ5	Q9DCJ5	NADH dehydrogenase [ubiquinone] 1 alpha subcomplex subunit 8
Rps23	22.9157	3	0	6.9079	25.5763	4	P62267	P62267	40S ribosomal protein S23
Dhrs4	22.9133	11	0	34.918	27.2637	11	Q99LB2;A0A2I3BRG8;Q9D2U3;A0A2I3BPY3;A0A2I3BQ25;A0A2I3BRQ8	Q99LB2;A0A2I3BRG8;Q9D2U3	Dehydrogenase/reductase SDR family member 4
Tardbp	22.9132	7	0	58.314	27.1622	10	Q921F2;Q6VYI4;Q6VYI5;Q8BLD4;Q8R0B4;A0A087WRZ5;A0A087WR97;A0A087WQA5;A0A087WSH7;A0A087WSE4;H3BJV1;A0A087WRP4;A0A087WP57;A0A087WS74;A0A087WNY6;A0A087WQX8;A0A087WS17	Q921F2;Q6VYI4;Q6VYI5;Q8BLD4;Q8R0B4;A0A087WRZ5;A0A087WR97;A0A087WQA5	TAR DNA-binding protein 43
Vapa	22.9097	8	0	34.384	28.3409	15	Q9WV55;A0A3B2W837	Q9WV55;A0A3B2W837	Vesicle-associated membrane protein-associated protein A
Sfpq	22.9074	15	0	52.011	28.5383	19	Q8VIJ6	Q8VIJ6	Splicing factor, proline- and glutamine-rich
Add1	22.9067	20	0	98.529	28.6226	21	F8WHZ9;F8WGR0;Q9QYC0;F6RDR0	F8WHZ9;F8WGR0;Q9QYC0	Alpha-adducin
Psmb9	22.9058	4	0	12.21	26.1562	4	A0A0R4J256;P28076	A0A0R4J256;P28076	Proteasome subunit beta type-9
H2afx	22.905	2	0	55.238	28.5328	9	P27661	P27661	Histone H2AX
Anxa1	22.9021	14	0	55.655	28.3768	18	P10107;A0A494BBD8	P10107;A0A494BBD8	Annexin A1
Rps27	22.8976	2	0	5.925	25.9479	3	A0A0G2JDW7;Q6ZWU9;A0A0G2JG29;A0A0G2JEX7	A0A0G2JDW7;Q6ZWU9;A0A0G2JG29	40S ribosomal protein S27
Casp3	22.8938	11	0	29.299	27.2168	13	P70677;A0A1B0GRX1	P70677	Caspase-3;Caspase-3 subunit p17;Caspase-3 subunit p12
2002-03-01	22.8888	11	0	34.106	27.371	13	Q922Q1;E0CZH6	Q922Q1;E0CZH6	Mitochondrial amidoxime reducing component 2
Lamp2	22.8836	5	0	9.8662	27.276	6	P17047	P17047	Lysosome-associated membrane glycoprotein 2
Ssr3	22.8833	1	0	3.2555	25.3984	2	Q9DCF9	Q9DCF9	Translocon-associated protein subunit gamma
Tufm	22.8811	18	0	83.155	29.0248	24	Q8BFR5;A0A0U1RNQ6;A0A0U1RPC4	Q8BFR5	Elongation factor Tu, mitochondrial
Ctsa	22.878	11	0	68.11	29.1364	15	G3X8T3;P16675;A2A5J9;A2A5J8	G3X8T3;P16675	Carboxypeptidase;Lysosomal protective protein;Lysosomal protective protein 32 kDa chain;Lysosomal protective protein 20 kDa chain
Selp	22.8755	11	0	31.208	28.0052	12	Q01102	Q01102	P-selectin
Ces2g	22.8671	10	0	84.752	28.1271	14	E9PV38;Q6PDB7;Q91WG0;Q149K3;Q08ED5;Q8BK48	E9PV38	Carboxylic ester hydrolase
Dek	22.8613	7	0	28.694	27.3793	9	Q7TNV0;E9Q8Y1;D3YVJ6	Q7TNV0;E9Q8Y1;D3YVJ6	Protein DEK
Vars	22.8581	32	0	208.01	30.1017	41	Q9Z1Q9;G3UY93;G3UZ22;G3UYW2;G3UZX1	Q9Z1Q9;G3UY93	Valine--tRNA ligase
Tmed7	22.856	5	0	17.051	27.5026	10	E9Q7G1;D3YZZ5	E9Q7G1;D3YZZ5
Otub1	22.8551	9	0	42.297	28.0054	12	Q7TQI3;D3YWF6;D3Z7K0	Q7TQI3;D3YWF6;D3Z7K0	Ubiquitin thioesterase OTUB1
Syk	22.8537	25	0	111.09	29.5992	39	P48025;E9PWE9;P43404;Q8BZ25	P48025;E9PWE9	Tyrosine-protein kinase SYK;Tyrosine-protein kinase
Cisd1	22.8476	3	0	14.002	27.292	6	Q91WS0	Q91WS0	CDGSH iron-sulfur domain-containing protein 1
Acsf2	22.8379	18	0	92.756	28.6088	20	Q8VCW8	Q8VCW8	Acyl-CoA synthetase family member 2, mitochondrial
Raly	22.8361	8	0	29.457	27.5097	9	A2AU62;Q64012;A2AU61;A2AU60	A2AU62;Q64012;A2AU61;A2AU60	RNA-binding protein Raly
Nt5c	22.8331	9	0	35.42	27.7086	13	Q9JM14;A2A9X5	Q9JM14;A2A9X5	5(3)-deoxyribonucleotidase, cytosolic type
Twf2	22.8202	12	0	113.81	29.161	20	Q9Z0P5;A0A1L1SU53;A0A1L1STC8;A0A087WRG4	Q9Z0P5;A0A1L1SU53	Twinfilin-2
Etfdh	22.818	16	0	56.645	28.1939	20	Q6PF96;Q921G7	Q6PF96;Q921G7	Electron transfer flavoprotein-ubiquinone oxidoreductase, mitochondrial
Lman2	22.8176	13	0	35.546	27.8447	16	Q9DBH5	Q9DBH5	Vesicular integral-membrane protein VIP36
Anxa4	22.8072	6	0	34.594	27.1712	7	D3Z0S1;A0A0N4SW89;P97429;F7ANV6;A0A0N4SV57;S4R1F2	D3Z0S1;A0A0N4SW89;P97429;F7ANV6;A0A0N4SV57	Annexin;Annexin A4
Snca	22.8029	5	0	15.226	26.8662	6	O55042	O55042	Alpha-synuclein
Acyp1	22.7946	5	0	16.281	25.7946	5	P56376;E9QJT5;Q8BMV3	P56376;E9QJT5	Acylphosphatase-1;Acylphosphatase
Txnl1	22.7937	13	0	68.174	28.656	16	A0A494B955;A0A498WGD8;Q8CDN6;A0A494BBI1;A0A494BB31	A0A494B955;A0A498WGD8;Q8CDN6;A0A494BBI1	Thioredoxin-like protein 1
Eif1	22.793	8	0	34.699	27.0394	7	P48024	P48024	Eukaryotic translation initiation factor 1
Caprin1	22.7921	8	0	50.822	27.8051	11	Q60865;F6YLI0	Q60865	Caprin-1
Psma2	22.7903	6	0	48.812	27.6804	14	P49722;Q8BKE0	P49722;Q8BKE0	Proteasome subunit alpha type-2
Acadm	22.7899	13	0	61.279	28.5763	17	P45952;D6RFD7	P45952	Medium-chain specific acyl-CoA dehydrogenase, mitochondrial
Ndufb8	22.7899	7	0	12.858	26.6847	8	Q9D6J5;Q3V406;F6VCY0;E9Q9J5	Q9D6J5;Q3V406;F6VCY0;E9Q9J5	NADH dehydrogenase [ubiquinone] 1 beta subcomplex subunit 8, mitochondrial
Ivd	22.7827	14	0	87.203	28.188	17	Q9JHI5	Q9JHI5	Isovaleryl-CoA dehydrogenase, mitochondrial
Glod4	22.7779	12	0	61.294	27.9944	16	Q9CPV4;E9Q197;F6ZTG3;F7BB55;E9Q055;E9Q2R6	Q9CPV4;E9Q197;F6ZTG3	Glyoxalase domain-containing protein 4
Scarb2	22.775	7	0	24.579	28.1021	15	O35114	O35114	Lysosome membrane protein 2
Sec22b	22.7743	7	0	31.303	26.8062	7	O08547;E9Q6R3;A0A0G2JF08;D6RES2	O08547;E9Q6R3	Vesicle-trafficking protein SEC22b
Psmd13	22.7679	14	0	33.011	27.8981	14	Q9WVJ2;E9Q5I9;F6ZQQ3;E9Q0U1;F6PXS6	Q9WVJ2;E9Q5I9;F6ZQQ3	26S proteasome non-ATPase regulatory subunit 13
Kpnb1	22.7672	22	0	98.46	29.3387	30	P70168	P70168	Importin subunit beta-1
Rbbp7	22.7668	12	0	68.377	27.5532	15	A2AFI9;Q60973;A2AFJ1;F6ZLC6	A2AFI9;Q60973;A2AFJ1;F6ZLC6	Histone-binding protein RBBP7
Pip4k2a	22.7665	12	0	75.022	28.0663	14	O70172;F6RJE8;A2ASS3	O70172	Phosphatidylinositol 5-phosphate 4-kinase type-2 alpha
Sfxn3	22.7659	8	0	32.236	27.2454	9	Q91V61;Q3U4F0;A0A494BB84	Q91V61;Q3U4F0;A0A494BB84	Sideroflexin-3
Uqcrq	22.7648	1	0.0076902	1.4363	25.3498	1	Q9CQ69	Q9CQ69	Cytochrome b-c1 complex subunit 8
Mapk14	22.763	14	0	65.468	28.1172	21	P47811;A0A3B2WB60;B2KF34;A0A3B2WAZ7	P47811;A0A3B2WB60;B2KF34	Mitogen-activated protein kinase 14
Kars	22.7538	17	0	78.004	28.3936	20	Q99MN1;Q8R2P8	Q99MN1;Q8R2P8	Lysine--tRNA ligase
Spcs3	22.7537	4	0	16.688	25.667	3	Q6ZWQ7	Q6ZWQ7
Fhod1	22.7488	29	0	116.3	29.0086	37	Q6P9Q4	Q6P9Q4	FH1/FH2 domain-containing protein 1
Nt5c3a	22.7469	15	0	52.673	28.045	20	Q9D020;A0A0N4SW80	Q9D020	Cytosolic 5-nucleotidase 3A
Hmgcl	22.7435	8	0	34.944	27.1878	13	P38060	P38060	Hydroxymethylglutaryl-CoA lyase, mitochondrial
Stim1	22.7403	16	0	264.47	28.3358	18	P70302;A0A1B0GRA5;A0A1B0GR78;A0A1B0GQZ3;F6WBP9;I1E4X8;P83093	P70302;A0A1B0GRA5;A0A1B0GR78	Stromal interaction molecule 1
Tomm20	22.7401	1	0.00030665	2.6684	24.325	1	A0A1D5RLZ6;Q9DCC8	A0A1D5RLZ6;Q9DCC8	Mitochondrial import receptor subunit TOM20 homolog
Acp5	22.7385	8	0	48.317	28.8115	18	Q05117	Q05117	Tartrate-resistant acid phosphatase type 5
Stat1	22.7376	26	0	129.35	29.3038	35	Q8C3V4;A0A087WSP5;Q99K94;P42225;Q8CFQ1;A0A087WRI1;A0A087WSQ5	Q8C3V4;A0A087WSP5;Q99K94;P42225	Signal transducer and activator of transcription;Signal transducer and activator of transcription 1
Tgfb1i1	22.733	13	0	55.321	28.1783	14	Q62219;E9Q1D5;E9PYQ1	Q62219;E9Q1D5	Transforming growth factor beta-1-induced transcript 1 protein
Psmb10	22.7324	5	0	9.6076	26.5486	7	O35955	O35955	Proteasome subunit beta type-10
Sarnp	22.731	6	0	26.659	26.4412	6	Q9D1J3;A0A1W2P7G2;A0A1W2P6N2	Q9D1J3;A0A1W2P7G2;A0A1W2P6N2	SAP domain-containing ribonucleoprotein
Psmd11	22.7303	17	0	53.375	28.152	18	Q8BG32;G3UYI4;G3UYL3;G3UYH2;G3UYL8;G3UX15;G3UWW7;G3UXL5;G3UX67;G3UWV7;G3UZ28;G3UZ33	Q8BG32	26S proteasome non-ATPase regulatory subunit 11
Capn2	22.7295	25	0	107.04	29.6745	36	O08529	O08529	Calpain-2 catalytic subunit
Prkca	22.7272	18	0	66.586	28.9575	26	Q4VA93;P20444;Q3TQ39;Q2NKI4;P63318	Q4VA93;P20444	Protein kinase C;Protein kinase C alpha type
Glb1	22.7268	15	0	43.881	28.2425	17	P23780;A0A1L1SSJ7	P23780	Beta-galactosidase
Hnrnpm	22.7219	16	0	63.128	28.7157	21	Q9D0E1;B8JK33;B8JK32;A0A3Q4EH91;F6W322;F7C9U3;A0A3Q4L2X3	Q9D0E1;B8JK33;B8JK32	Heterogeneous nuclear ribonucleoprotein M
Pycard	22.7149	7	0	30.508	27.4745	8	Q9EPB4;A0A0U1RQ20	Q9EPB4;A0A0U1RQ20	Apoptosis-associated speck-like protein containing a CARD
Ptpn11	22.7136	24	0	76.312	28.6857	33	P35235	P35235	Tyrosine-protein phosphatase non-receptor type 11
Gdi1	22.7128	16	0	110.17	28.7797	18	P50396;D6RI86;B7FAU8	P50396	Rab GDP dissociation inhibitor alpha
Gm2a	22.7094	3	0	6.6193	26.6249	4	Q60648	Q60648	Ganglioside GM2 activator
Fnbp1	22.7048	16	0	74.726	28.0996	17	A2AQ43;A2AQ44;A2AQ42;A2AQ45;A2AQ41;Q80TY0;F6VVN1;A0A0A6YWT1;A2AQ47;A2AQ39	A2AQ43;A2AQ44;A2AQ42;A2AQ45;A2AQ41;Q80TY0;F6VVN1;A0A0A6YWT1	Formin-binding protein 1
Pdap1	22.7035	4	0	12.544	26.0304	5	Q3UHX2	Q3UHX2	28 kDa heat- and acid-stable phosphoprotein
Txndc17	22.7017	4	0	12.173	25.5091	4	Q9CQM5	Q9CQM5	Thioredoxin domain-containing protein 17
Timm50	22.7011	8	0	29.134	27.3311	10	Q9D880	Q9D880	Mitochondrial import inner membrane translocase subunit TIM50
Stk4	22.7006	16	0	47.092	28.2617	20	Q9JI11;A2A5M9;Q8CDG4;F7BYZ4	Q9JI11	Serine/threonine-protein kinase 4;Serine/threonine-protein kinase 4 37kDa subunit;Serine/threonine-protein kinase 4 18kDa subunit
Slc25a12	22.6953	25	0	78.148	28.4523	32	Q8BH59;V9GXX9	Q8BH59	Calcium-binding mitochondrial carrier protein Aralar1
Was	22.6952	13	0	36.458	28.1003	17	P70315	P70315	Wiskott-Aldrich syndrome protein homolog
Apoa4	22.6942	5	0	13.174	27.6293	6	P06728	P06728	Apolipoprotein A-IV
Atp6v0d1	22.6923	10	0	31.027	27.1932	9	P51863	P51863	V-type proton ATPase subunit d 1
Eif3f	22.6922	8	0	29.203	27.9227	11	Q9DCH4	Q9DCH4	Eukaryotic translation initiation factor 3 subunit F
Igkv8-27	22.6914	1	0	3.0417	25.0133	1	A0A075B5N4;A0A140T8P7;A0A0G2JF28;A0A140T8P5;A0A140T8M3	A0A075B5N4;A0A140T8P7;A0A0G2JF28;A0A140T8P5;A0A140T8M3
Pfdn4	22.6909	1	0	3.8286	22.6909	1	E9Q4Q8;E9Q8R1;Q6P0X1;E9Q6U4;Q3UWL8	E9Q4Q8;E9Q8R1;Q6P0X1;E9Q6U4;Q3UWL8	Prefoldin subunit 4
Decr1	22.6883	9	0	36.299	27.9853	10	Q9CQ62	Q9CQ62	2,4-dienoyl-CoA reductase, mitochondrial
Alad	22.6856	11	0	86.916	28.0651	19	P10518	P10518	Delta-aminolevulinic acid dehydratase
D10Jhu81e	22.6806	7	0	35.742	28.2261	11	Q9D172;A0A1W2P870;A0A1W2P7B6	Q9D172	ES1 protein homolog, mitochondrial
Rcc2	22.6806	18	0	67.306	28.6503	19	Q8BK67;A2AWQ2	Q8BK67	Protein RCC2
Mdp1	22.6741	4	0	13.026	26.0987	4	Q9D967	Q9D967	Magnesium-dependent phosphatase 1
Hars	22.6739	19	0	58.374	27.9185	23	Q61035;A0A494BAV2;A0A494B9A1	Q61035	Histidine--tRNA ligase, cytoplasmic
Qdpr	22.6734	7	0	40.257	26.9142	8	D3YWR7;Q8BVI4;A0A0G2JGJ1;A0A0G2JGY0;D3Z1A1;D3Z099	D3YWR7;Q8BVI4;A0A0G2JGJ1;A0A0G2JGY0;D3Z1A1	Dihydropteridine reductase
Chmp4b	22.6712	4	0	25.663	26.4785	3	Q9D8B3	Q9D8B3	Charged multivesicular body protein 4b
Fyb	22.666	24	0	129.03	29.4858	33	O35601;A0A2I3BRH1;A0A2I3BPY6;F6V072	O35601	FYN-binding protein
Rps24	22.6647	5	0	17.382	26.3665	8	P62849;A0A286YEB7	P62849;A0A286YEB7	40S ribosomal protein S24
	22.6644	1	0	3.8961	24.9863	2	Q9CQT9	Q9CQT9	Uncharacterized protein C20orf24 homolog
Pafah1b1	22.6641	16	0	80.844	28.3918	18	P63005;Q5SW16	P63005	Platelet-activating factor acetylhydrolase IB subunit alpha
Psmc1	22.6602	15	0	69.471	27.9433	19	P62192	P62192	26S protease regulatory subunit 4
Lgals9	22.6602	8	0	37.263	27.1399	9	B1AQR8;G3X9T7;O08573	B1AQR8;G3X9T7;O08573	Galectin;Galectin-9
Epb4.1;Epb41	22.6575	27	0	123.44	29.5156	31	A2A839;A2A838;A2A841;P48193;A0A571BEG4;A2A842;A2AD32;A0A1D5RLV1;F7BUB8;F6S4K9;F7CR30	A2A839;A2A838;A2A841;P48193;A0A571BEG4;A2A842;A2AD32;A0A1D5RLV1	Protein 4.1
Cbr1	22.6562	9	0	59.338	27.2255	9	P48758;A0A338P684;A0A1B0GRG8	P48758;A0A338P684	Carbonyl reductase [NADPH] 1
Ube2k	22.6553	9	0	26.659	26.5623	11	P61087;A0A0J9YUI1;D3Z4U3;A0A0J9YU07;Q3V3R8;F8WIC2;A0A0J9YUR9	P61087;A0A0J9YUI1;D3Z4U3;A0A0J9YU07	Ubiquitin-conjugating enzyme E2 K
Pitpna	22.6501	15	0	45.252	28.4343	20	P53810;J3QQ30;J3QPW1;F8WGG5	P53810;J3QQ30;J3QPW1	Phosphatidylinositol transfer protein alpha isoform
Grn	22.6459	7	0	23.574	27.4563	8	Q3U9N4;P28798;H3BJE0;H3BJ90;H3BLC9	Q3U9N4;P28798;H3BJE0	Granulins;Acrogranin;Granulin-1;Granulin-2;Granulin-3;Granulin-4;Granulin-5;Granulin-6;Granulin-7
Epb42;Epb4.2	22.6417	17	0	78.167	28.2978	22	P49222;Q3UV95	P49222;Q3UV95	Erythrocyte membrane protein band 4.2
Ndufa12	22.6351	9	0	26.237	26.7331	9	Q7TMF3;A0A0R4J275;F6RBR6	Q7TMF3;A0A0R4J275;F6RBR6	NADH dehydrogenase [ubiquinone] 1 alpha subcomplex subunit 12
Ndufs8	22.6306	5	0	24.58	26.5638	9	Q8K3J1;A0A494BAW8	Q8K3J1;A0A494BAW8	NADH dehydrogenase [ubiquinone] iron-sulfur protein 8, mitochondrial
Pycr2	22.629	9	0	28.448	27.6319	10	Q922Q4	Q922Q4	Pyrroline-5-carboxylate reductase 2
Hpcal1	22.6287	9	0	29.722	27.752	11	P62748;A0A1Y7VMK3;P84075;A2A7R5;E9PV73	P62748;A0A1Y7VMK3	Hippocalcin-like protein 1
Arhgap1	22.6272	14	0	41.805	27.6743	14	Q5FWK3;A2AH25	Q5FWK3;A2AH25	Rho GTPase-activating protein 1
Mgst1	22.6264	3	0	15.86	26.3985	4	D3YU60;E9QJW0;Q91VS7	D3YU60;E9QJW0;Q91VS7	Microsomal glutathione S-transferase 1
Ctrb1	22.6239	7	0	19.755	26.9955	10	Q9CR35	Q9CR35	Chymotrypsinogen B;Chymotrypsin B chain A;Chymotrypsin B chain B;Chymotrypsin B chain C
Hyou1	22.6193	31	0	148.6	29.5245	47	Q9JKR6;F6TRP3;A0A1L1SQ34;E0CYZ2	Q9JKR6	Hypoxia up-regulated protein 1
Gnaq	22.6189	10	0	45.428	27.0352	12	P21279	P21279	Guanine nucleotide-binding protein G(q) subunit alpha
Rexo2	22.6187	5	0	20.562	26.9229	8	Q9D8S4;A0A1L1SS58	Q9D8S4	Oligoribonuclease, mitochondrial
Cela2a	22.6176	7	0	47.085	27.4985	9	P05208	P05208	Chymotrypsin-like elastase family member 2A
Mcpt8	22.6157	8	0	40.912	27.4	9	P43430;A0A286YDN6	P43430	Mast cell protease 8
Rpl28	22.6139	4	0	9.4721	25.6307	5	P41105	P41105	60S ribosomal protein L28
Rps29	22.6139	1	0.0052866	1.5913	23.6139	4	P62274	P62274	40S ribosomal protein S29
Cisd2	22.6119	4	0	8.771	26.0334	4	Q9CQB5;D3Z3X4	Q9CQB5;D3Z3X4	CDGSH iron-sulfur domain-containing protein 2
Mtch2	22.6116	10	0	29.998	27.9694	10	Q791V5;A2AFW6;Q9D050;D6RCZ1	Q791V5;A2AFW6;Q9D050	Mitochondrial carrier homolog 2
Pdia2	22.6115	13	0	48.527	28.1455	18	D3Z6P0;F6S5U2;F6Q519	D3Z6P0	Protein disulfide-isomerase A2
Eif3e	22.6101	15	0	40.314	28.175	23	P60229	P60229	Eukaryotic translation initiation factor 3 subunit E
Srgn	22.6063	3	0	22.171	25.344	3	P13609	P13609	Serglycin
Lgals3bp	22.6059	14	0	82.112	28.8533	25	Q07797;E9Q5X5	Q07797	Galectin-3-binding protein
Cdk1	22.6042	7	0	14.616	27.0189	7	P11440;D3Z2T9;A0A0G2JDL3;E3W997;E9PVC7;A0A1L1SUS7;A0A1Y7VLM0;Q99J95;Q3V3A1;Q04899;O35495;Q04735;Q8K0D0;Q14AX6;Q69ZA1	P11440;D3Z2T9	Cyclin-dependent kinase 1
Gatm	22.6038	17	0	80.322	28.2539	33	Q9D964	Q9D964	Glycine amidinotransferase, mitochondrial
Ndufb2	22.6	1	0.00030864	2.7206	24.6	1	Q9CPU2	Q9CPU2	NADH dehydrogenase [ubiquinone] 1 beta subcomplex subunit 2, mitochondrial
Nans	22.589	10	0	51.544	27.4969	14	Q99J77	Q99J77
Ndufa3	22.5874	1	0	8.7392	24.5874	2	Q9CQ91	Q9CQ91	NADH dehydrogenase [ubiquinone] 1 alpha subcomplex subunit 3
Iah1	22.5779	9	0	36.338	26.4468	11	Q9DB29;A0A1Y7VLY5;A0A1Y7VKA0;A0A1Y7VKC6	Q9DB29;A0A1Y7VLY5;A0A1Y7VKA0;A0A1Y7VKC6	Isoamyl acetate-hydrolyzing esterase 1 homolog
Cttn	22.5711	10	0	86.305	27.7156	11	Q921L6;Q60598	Q921L6;Q60598	Src substrate cortactin
Kctd12	22.5705	12	0	40.339	28.3462	17	A0A0R4J2B2;Q6WVG3;Q8C7J6;Q5DTY9;Q50H33	A0A0R4J2B2;Q6WVG3	BTB/POZ domain-containing protein KCTD12
Vtn	22.5682	6	0	38.844	28.6245	11	P29788	P29788	Vitronectin
Ddt;Gm20441	22.5676	4	0	18.526	26.2942	5	O35215;G3UZN1;G3UYJ7	O35215;G3UZN1;G3UYJ7	D-dopachrome decarboxylase
Eif3l	22.5658	18	0	95.251	28.5565	24	Q8QZY1;A0A2R8VH97	Q8QZY1	Eukaryotic translation initiation factor 3 subunit L
Ddx3x;D1Pas1	22.5556	18	0	68.291	28.3699	25	Q62167;P16381	Q62167;P16381	ATP-dependent RNA helicase DDX3X;Putative ATP-dependent RNA helicase Pl10
Suclg2	22.555	14	0	58.324	28.0685	15	Q9Z2I8;A0A0N4SWD1	Q9Z2I8	Succinyl-CoA ligase [GDP-forming] subunit beta, mitochondrial
Srsf7	22.5548	2	0	5.1634	25.7332	2	A0A3Q4EH04;A0A3Q4L335;A0A3Q4L393;Q8BL97	A0A3Q4EH04;A0A3Q4L335;A0A3Q4L393;Q8BL97	Serine/arginine-rich splicing factor 7
Pgrmc2	22.5539	5	0	27.821	26.0534	5	Q80UU9	Q80UU9	Membrane-associated progesterone receptor component 2
Hmbs	22.5536	15	0	44.995	29.4892	20	P22907;A0A1L1ST19;A0A1L1SRM0	P22907	Porphobilinogen deaminase
Ahsg	22.5522	3	0	12.557	25.7221	2	A0A338P703;A0A338P7G1;A0A338P7H5;P29699;A0A338P692	A0A338P703;A0A338P7G1;A0A338P7H5;P29699	Alpha-2-HS-glycoprotein
Sptan1	22.5511	105	0	323.31	31.0985	138	A3KGU5;E9Q447;A3KGU4;A0A5F8MQC3	A3KGU5;E9Q447
Arpc5l	22.5483	3	0	14.882	26.0528	4	Q9D898	Q9D898	Actin-related protein 2/3 complex subunit 5-like protein
Smpd4	22.5465	1	0	6.5411	22.5465	1	A0A338P6E2;A0A338P715;A0A338P6P4;A0A338P7A7;A0A338P6I0;A0A338P6B0;A0A338P6U9;A0A338P7L1;A0A338P6S3;A0A338P695;Q6ZPR5	A0A338P6E2;A0A338P715;A0A338P6P4;A0A338P7A7;A0A338P6I0;A0A338P6B0;A0A338P6U9;A0A338P7L1;A0A338P6S3;A0A338P695;Q6ZPR5	Sphingomyelin phosphodiesterase 4
Acp2	22.5461	8	0	17.815	27.4277	9	A0A5F8MPS7;P24638;B7ZCF4;B7ZCF5	A0A5F8MPS7;P24638;B7ZCF4;B7ZCF5	Lysosomal acid phosphatase
Ppp2cb;Ppp2ca	22.5362	10	0	46.217	27.5231	9	P62715;P63330	P62715;P63330	Serine/threonine-protein phosphatase 2A catalytic subunit beta isoform;Serine/threonine-protein phosphatase 2A catalytic subunit alpha isoform
Vps29	22.5302	4	0	45.419	26.2398	6	D3YYD5;D3Z645;Q9QZ88;D3YW98	D3YYD5;D3Z645;Q9QZ88;D3YW98	Vacuolar protein sorting-associated protein 29
Chchd3	22.5267	6	0	31.631	27.3679	8	Q9CRB9;S4R238;Q9D9P1;D3Z0L4;F6QFL0	Q9CRB9;S4R238;Q9D9P1;D3Z0L4	MICOS complex subunit Mic19
Gng2	22.526	2	0	5.0784	25.0007	2	P63213	P63213	Guanine nucleotide-binding protein G(I)/G(S)/G(O) subunit gamma-2
Acaa1a;Acaa1b	22.5254	14	0	122.05	28.8153	22	Q921H8;H3BKL5;H3BJZ9;Q8VCH0;H3BKA1;H3BJG8;H3BJC1	Q921H8;H3BKL5;H3BJZ9;Q8VCH0	3-ketoacyl-CoA thiolase A, peroxisomal;3-ketoacyl-CoA thiolase B, peroxisomal
Dync1i2	22.5251	11	0	54.237	28.2961	15	Q3TPJ8;A2BFF9;O88487;A2BFF8;A2BFF5;Q3TYJ3;D3Z0M6;O88485	Q3TPJ8;A2BFF9;O88487;A2BFF8;A2BFF5	Cytoplasmic dynein 1 intermediate chain 2
Cyb5b	22.5247	5	0	38.764	27.8438	7	Q9CQX2	Q9CQX2	Cytochrome b5 type B
Dnajb4	22.5243	11	0	63.408	27.5733	14	Q9D832	Q9D832	DnaJ homolog subfamily B member 4
Stoml2	22.5221	9	0	47.247	27.1934	13	Q99JB2;A2AG39;F6WI02;A2AG41	Q99JB2;A2AG39;F6WI02	Stomatin-like protein 2, mitochondrial
Gusb	22.5203	16	0	74.902	28.4725	20	P12265;Q99KJ6;D3YY48	P12265	Beta-glucuronidase
Gyg;Gyg1	22.5188	6	0	14.27	27.0338	10	K3W4S6;V9GX26;Q9R062	K3W4S6;V9GX26;Q9R062	Glycogenin-1
Leprel1	22.5183	1	0.0025663	1.8313	27.7662	1	Q8CG71	Q8CG71	Prolyl 3-hydroxylase 2
Lgals3bp	22.5177	1	0	4.3324	24.8397	1	F6VRP8	F6VRP8
Reep5	22.5121	6	0	14.719	26.3077	6	A0A494BBE3;G3X8R0;Q60870	A0A494BBE3;G3X8R0	Receptor expression-enhancing protein
Mtx1	22.5101	10	0	40.258	26.8451	9	Q8R5C0;A0A6I8MWZ8;P47802;D3Z3F4;G3XA75;G3UXX9;D3YVW0;G3UYJ5;G3UXB5	Q8R5C0;A0A6I8MWZ8;P47802;D3Z3F4;G3XA75;G3UXX9;D3YVW0	Metaxin-1
Fkbp1a	22.506	3	0	16.185	24.9367	3	P26883;F6X9I3	P26883	Peptidyl-prolyl cis-trans isomerase FKBP1A
Sptb	22.5054	87	0	323.31	30.6147	114	Q3UGX2;E9Q397;P15508	Q3UGX2;E9Q397;P15508	Spectrin beta chain, erythrocytic
Mpp1	22.5015	22	0	89.133	29.1643	28	P70290;B7ZCL8;A2AN84;B7ZCL9;B7ZCM0;B7ZCM1;D6RFD5	P70290;B7ZCL8;A2AN84;B7ZCL9	55 kDa erythrocyte membrane protein
Atp6v1e1	22.4999	7	0	15.619	26.4216	8	P50518;A0A0N4SW34;A0A0N4SW07;A0A0N4SWA3;Q9D593	P50518;A0A0N4SW34	V-type proton ATPase subunit E 1
Lypla1	22.4988	5	0	28.901	26.3578	6	J3QP56;P97823;D3YUG4;D3Z269;D3Z111	J3QP56;P97823;D3YUG4	Acyl-protein thioesterase 1
Cstb	22.4977	4	0	14.234	26.7512	6	Q62426	Q62426	Cystatin-B
Alg5	22.4957	1	0	3.5777	24.0807	1	D6RCG2;Q9DB25	D6RCG2;Q9DB25	Dolichyl-phosphate beta-glucosyltransferase
Scamp2	22.4945	2	0	43.151	27.272	4	Q9ERN0;A0A1L1SUU4	Q9ERN0;A0A1L1SUU4	Secretory carrier-associated membrane protein 2
Tpp1	22.4939	6	0	70.612	29.7285	15	O89023	O89023	Tripeptidyl-peptidase 1
Ndufb10	22.4935	5	0	10.033	26.8137	7	D3YUK4;Q9DCS9	D3YUK4;Q9DCS9	NADH dehydrogenase [ubiquinone] 1 beta subcomplex subunit 10
Kras;Hras	22.4925	6	0	22.963	26.2481	6	P32883;C0H5X4;Q61411;A0A0G2JGM2;B2KGV5;E9Q8V2;E9PVD5;A0A0N4SVY1	P32883;C0H5X4;Q61411;A0A0G2JGM2	GTPase KRas;GTPase KRas, N-terminally processed;GTPase HRas;GTPase HRas, N-terminally processed
Ifitm3	22.4897	3	0	12.086	27.0071	8	Q9CQW9;A0A1B0GT68;Q99J93	Q9CQW9	Interferon-induced transmembrane protein 3
Hsd17b4	22.4872	18	0	53.085	28.8679	25	P51660	P51660	Peroxisomal multifunctional enzyme type 2;(3R)-hydroxyacyl-CoA dehydrogenase;Enoyl-CoA hydratase 2
Ptprc	22.4806	32	0	196.15	29.938	41	S4R1M0;P06800	S4R1M0;P06800	Protein-tyrosine-phosphatase;Receptor-type tyrosine-protein phosphatase C
Ruvbl2	22.4763	16	0	50.42	27.7849	16	Q9WTM5;A0A1B0GSR4;A0A1B0GRW3;A0A1B0GR89;A0A1B0GT54;A0A1B0GRT1	Q9WTM5	RuvB-like 2
Ptgs1	22.4738	14	0	45.142	28.1251	16	P22437	P22437	Prostaglandin G/H synthase 1
Sec61b;Gm10320	22.4722	2	0	4.7935	25.0572	3	Q9CQS8;E9PW43	Q9CQS8;E9PW43	Protein transport protein Sec61 subunit beta
Nsfl1c	22.4619	10	0	48.751	27.5555	11	A2AT02;Q9CZ44	A2AT02;Q9CZ44	NSFL1 cofactor p47
Eif3j1;Eif3j2	22.4554	6	0	19.145	26.6707	6	Q3UGC7;Q66JS6	Q3UGC7;Q66JS6	Eukaryotic translation initiation factor 3 subunit J-A;Eukaryotic translation initiation factor 3 subunit J-B
Limd2	22.455	2	0	28.384	26.2903	4	Q8BGB5	Q8BGB5	LIM domain-containing protein 2
Ssbp1	22.4545	6	0	33.677	26.0603	7	Q8R2K3;Q9CYR0;D3Z3Y3	Q8R2K3;Q9CYR0	Single-stranded DNA-binding protein;Single-stranded DNA-binding protein, mitochondrial
Trap1	22.4525	21	0	91.032	28.4331	24	Q9CQN1	Q9CQN1	Heat shock protein 75 kDa, mitochondrial
Fam177a1	22.4523	4	0	18.512	25.7742	4	Q8BR63	Q8BR63	Protein FAM177A1
Lamtor1	22.4522	7	0	24.011	27.5635	12	Q9CQ22;A0A0A6YX02	Q9CQ22;A0A0A6YX02	Ragulator complex protein LAMTOR1
Igkv17-127;Igkv17-121	22.4521	1	0.0017227	1.9042	23.4521	1	A0A075B5J9;A0A075B5K3;A0A0G2JFA8;A0A0G2JDN5	A0A075B5J9;A0A075B5K3;A0A0G2JFA8;A0A0G2JDN5
Ap2s1	22.4482	3	0.00029842	2.359	25.3489	3	P62743;A0A0U1RPS0;A0A0U1RQ06	P62743;A0A0U1RPS0	AP-2 complex subunit sigma
Cnp	22.4454	13	0	109.89	28.7038	17	P16330	P16330	2,3-cyclic-nucleotide 3-phosphodiesterase
Rala	22.4414	4	0	6.6434	26.2323	5	P63321;A0A1Y7VL93	P63321;A0A1Y7VL93	Ras-related protein Ral-A
Eif3c	22.4412	19	0	75.212	28.5323	25	Q8R1B4;M0QWV3	Q8R1B4	Eukaryotic translation initiation factor 3 subunit C
Csk	22.4409	17	0	61.742	28.0226	24	P41241;A0A1L1SR46;A0A1L1STA1;A0A1L1SQQ5;D3YVQ8;D6RGA0;A0A0R4J1P8;D3Z4T5;A0A0R4J1N6;P41242	P41241	Tyrosine-protein kinase CSK
Cox17	22.44	1	0	14.272	24.44	1	P56394	P56394	Cytochrome c oxidase copper chaperone
Sec61g	22.4343	2	0	4.0225	24.0193	6	P60060;G3UWH0	P60060;G3UWH0	Protein transport protein Sec61 subunit gamma
Vamp3;Vamp2	22.434	3	0	30.405	26.2907	4	P63024;B0QZN5;P63044	P63024;B0QZN5;P63044	Vesicle-associated membrane protein 3;Vesicle-associated membrane protein 2
Grpel1	22.4283	11	0	26.335	28.31	20	Q99LP6	Q99LP6	GrpE protein homolog 1, mitochondrial
Dnm2	22.4222	28	0	119.01	28.6803	29	Q3T9X3;P39054;F8WIV5;G3UZZ3	Q3T9X3;P39054;F8WIV5;G3UZZ3	Dynamin-2
Tomm40	22.4218	7	0	37.349	26.7372	10	Q9QYA2;G3UY77	Q9QYA2	Mitochondrial import receptor subunit TOM40 homolog
Alox5ap	22.4216	3	0	6.2884	24.7435	4	P30355;A0A0J9YUC8;A0A0J9YV38	P30355;A0A0J9YUC8	Arachidonate 5-lipoxygenase-activating protein
Evl	22.4207	15	0	57.472	28.3179	20	F8WJB9;E9PVP4;P70429;A0A1Y7VJA2;A0A1Y7VNI5	F8WJB9;E9PVP4;P70429;A0A1Y7VJA2	Ena/VASP-like protein
Pacsin2	22.4197	11	0	36.882	27.6219	12	Q9WVE8;A0A2R8W6S4;A0A338P6P7;Q3UP40;A0A2R8W750	Q9WVE8;A0A2R8W6S4	Protein kinase C and casein kinase substrate in neurons protein 2
Ndufa7	22.4177	3	0	6.083	25.1398	3	Q9Z1P6	Q9Z1P6	NADH dehydrogenase [ubiquinone] 1 alpha subcomplex subunit 7
Ube2m	22.4146	3	0	21.948	25.874	4	P61082;F7CDT0;F6WMC0;G5E919	P61082;F7CDT0;F6WMC0	NEDD8-conjugating enzyme Ubc12
Ewsr1	22.4098	5	0	42.112	27.4123	7	Q5SUT0;Q5SUS9;Q61545;Q5SUS8	Q5SUT0;Q5SUS9;Q61545	RNA-binding protein EWS
Acot2;Acot1	22.4048	12	0	37.099	27.8011	17	Q9QYR9;O55137;Q32Q92;Q8BWN8;A0A1Y7VMZ4;Q91YQ6;Q6Q2Z6;Q9QYR7	Q9QYR9;O55137	Acyl-coenzyme A thioesterase 2, mitochondrial;Acyl-coenzyme A thioesterase 1
Tomm34	22.4024	10	0	31.246	27.2995	12	Q9CYG7	Q9CYG7	Mitochondrial import receptor subunit TOM34
Khsrp	22.4023	15	0	100.75	28.7805	17	A0A3B2WCD8;Q3U0V1;A0A3B2W465;A0A0G2JE55;A0A0G2JGT1	A0A3B2WCD8;Q3U0V1	Far upstream element-binding protein 2
Nr1d2	22.4003	1	0.0036364	1.6493	25.964	1	A0A286YD98;Q60674	A0A286YD98;Q60674	Nuclear receptor subfamily 1 group D member 2
Plekho2	22.3936	14	0	90.826	28.3779	22	Q8K124	Q8K124	Pleckstrin homology domain-containing family O member 2
Arfgap3	22.3929	2	0	5.3007	27.2509	3	A0A0R4J0T8;Q9D8S3	A0A0R4J0T8;Q9D8S3	ADP-ribosylation factor GTPase-activating protein 3
Rab1b	22.3903	3	0	35.246	26.7756	8	Q9D1G1;A0A494BA38;A0A494B945	Q9D1G1;A0A494BA38;A0A494B945	Ras-related protein Rab-1B
Pfdn2	22.3861	2	0	11.915	25.708	2	O70591;F8WJ30	O70591;F8WJ30	Prefoldin subunit 2
Pole3	22.3835	2	0	3.9836	23.9684	2	D6RDT4;A0A0R4J091;Q9JKP7	D6RDT4;A0A0R4J091;Q9JKP7	DNA polymerase epsilon subunit 3
Actr1a	22.3822	12	0	44.929	28.3949	16	P61164;A0A494BB86;A0A494BAH0	P61164;A0A494BB86	Alpha-centractin
Rasgrp2	22.3818	23	0	87.991	28.9249	31	Q9QUG9;D3YXD6;D3Z2F9;D6RDD3;D3YZX2;D3YZP2;D3Z3N3;D3YZP4;D3YZP1	Q9QUG9	RAS guanyl-releasing protein 2
Ppa1	22.3788	10	0	24.251	27.6002	10	Q9D819	Q9D819	Inorganic pyrophosphatase
Ppox	22.3784	17	0	75.927	28.3774	24	P51175;A0A0A6YX50	P51175;A0A0A6YX50	Protoporphyrinogen oxidase
Dnajb11	22.3762	9	0	49.084	27.7564	9	Q99KV1;A0A338P778	Q99KV1	DnaJ homolog subfamily B member 11
Mvp	22.3737	25	0	72.444	28.6266	26	Q9EQK5;E9Q3X0;D3Z2N7	Q9EQK5;E9Q3X0	Major vault protein
Apool	22.3729	8	0	37.041	27.0296	10	Q78IK4;B1AV14	Q78IK4;B1AV14	MICOS complex subunit Mic27
Sars	22.3672	14	0	66.612	27.9406	19	Q8C483;P26638;A2AFS0;A2AFS1	Q8C483;P26638;A2AFS0	Serine--tRNA ligase, cytoplasmic
Slc9a3r1	22.3634	8	0	28.457	28.4973	13	P70441	P70441	Na(+)/H(+) exchange regulatory cofactor NHE-RF1
Tmpo	22.3559	5	0	27.417	27.7383	7	Q61029	Q61029	Lamina-associated polypeptide 2, isoforms beta/delta/epsilon/gamma
Lamtor2	22.3558	5	0	19.803	25.0709	5	Q9JHS3;D3YTS4	Q9JHS3	Ragulator complex protein LAMTOR2
Sytl4	22.3464	27	0	83.743	28.447	31	Q9R0Q1;G3UYC6;A0A5F8MPI7;A0A5F8MPX2;A0A5F8MPH5;Q99N50	Q9R0Q1	Synaptotagmin-like protein 4
Hibch	22.3432	18	0	58.717	28.1391	28	Q8QZS1;E0CX19	Q8QZS1;E0CX19	3-hydroxyisobutyryl-CoA hydrolase, mitochondrial
Bud31	22.3419	6	0	17.044	25.8885	9	Q6PGH1	Q6PGH1	Protein BUD31 homolog
Sar1b	22.3414	8	0	21.147	26.6955	9	Q9CQC9;A0A1W2P720	Q9CQC9	GTP-binding protein SAR1b
Hsph1	22.3413	29	0	113.81	28.6651	33	Q61699;E9Q0U7;D3Z027;A0A0J9YTZ7;D3Z3I9	Q61699;E9Q0U7	Heat shock protein 105 kDa
Mbnl1	22.3374	4	0	7.7797	25.8513	4	A0A0A6YXE3;G3X9Q0;Q9JKP5;Q3U581	A0A0A6YXE3;G3X9Q0;Q9JKP5;Q3U581	Muscleblind-like protein 1
Gsn	22.3374	1	0.00058789	2.1862	25.3374	1	A6PWS5	A6PWS5
Ly6g6f	22.3268	8	0	35.001	27.4819	8	B2RXM6	B2RXM6
Pdlim7	22.3267	14	0	50.382	28.3059	19	Q3TJD7;Q8BVJ7;B8JJB3;B8JJB2;B8JJB1	Q3TJD7;Q8BVJ7	PDZ and LIM domain protein 7
Eif2a	22.3251	17	0	71.658	27.6118	17	Q8BJW6;D3YZZ6;D6RFN2;D6RGA6	Q8BJW6;D3YZZ6	Eukaryotic translation initiation factor 2A;Eukaryotic translation initiation factor 2A, N-terminally processed
2210010C04Rik	22.3207	5	0	14.369	26.6068	5	Q9CPN9;REV__B1ASC0;REV__H7BX92;REV__H7BX74;REV__Q8CGM1;REV__H7BWZ2	Q9CPN9
Gng11	22.32	1	0	2.9826	25.1075	2	P61953	P61953	Guanine nucleotide-binding protein G(I)/G(S)/G(O) subunit gamma-11
Nptn	22.3197	4	0	11.655	27.4288	7	P97300;H3BIX4;Z4YLB7;A0A0A0MQN8;H3BKA7	P97300;H3BIX4;Z4YLB7;A0A0A0MQN8;H3BKA7	Neuroplastin
Snrpa	22.3191	2	0	4.8792	23.9041	3	D6RI83;D3Z0S6;Q62189	D6RI83;D3Z0S6;Q62189	U1 small nuclear ribonucleoprotein A
Ighv1-42;Ighv1-31	22.3184	1	0	4.4247	24.9034	1	A0A075B5V6;A0A075B5V1;P01757;P01756;P06330	A0A075B5V6;A0A075B5V1;P01757;P01756;P06330	Ig heavy chain V region J558;Ig heavy chain V region MOPC 104E;Ig heavy chain V region AC38 205.12
Itga6	22.3182	29	0	116.83	28.7485	34	Q61739;A0A5F8MPB5;F6VSK8	Q61739;A0A5F8MPB5;F6VSK8	Integrin alpha-6;Integrin alpha-6 heavy chain;Integrin alpha-6 light chain
Capn1	22.3135	25	0	85.068	28.2122	26	O35350;A0A494BAS0;A0A494BAC4	O35350	Calpain-1 catalytic subunit
Fam49a	22.3115	9	0	55.069	27.4909	9	Q8BHZ0	Q8BHZ0	Protein FAM49A
Gnas	22.3107	8	0	43.205	27.1626	8	Z4YKV1;P63094;Q6R0H7;A0A571BEI3;A0A571BEM2;A0A571BE25;A0A571BEG2	Z4YKV1;P63094;Q6R0H7;A0A571BEI3;A0A571BEM2	Guanine nucleotide-binding protein G(s) subunit alpha isoforms short;Guanine nucleotide-binding protein G(s) subunit alpha isoforms XLas
Atp1b3	22.3094	6	0	19.61	26.9548	10	P97370	P97370	Sodium/potassium-transporting ATPase subunit beta-3
Snap29	22.3084	6	0	28.218	26.2287	7	Q9ERB0	Q9ERB0	Synaptosomal-associated protein 29
Impdh2	22.3012	19	0	79.461	28.454	24	P24547;A0A0A6YXS4;A0A0A6YY72	P24547	Inosine-5-monophosphate dehydrogenase 2
Mob1a;Mob1b	22.2953	6	0	16.146	27.041	7	Q921Y0;Q3UDM0;Q8BPB0	Q921Y0;Q3UDM0;Q8BPB0	MOB kinase activator 1A;MOB kinase activator 1B
Rap2b;Rap2a	22.2951	7	0	27.905	26.1842	9	P61226;Q80ZJ1	P61226;Q80ZJ1	Ras-related protein Rap-2b;Ras-related protein Rap-2a
Il16	22.2932	20	0	68.252	28.8562	22	O54824	O54824	Pro-interleukin-16;Interleukin-16
Cept1	22.2925	1	0.00029744	2.3245	23.2925	1	D3Z5Y5;D3YX12;A0A0A6YXR0;Q8BGS7	D3Z5Y5;D3YX12;A0A0A6YXR0;Q8BGS7	Choline/ethanolaminephosphotransferase 1
Skp1	22.2812	5	0	13.744	26.0304	8	Q9WTX5;E9PUV4	Q9WTX5	S-phase kinase-associated protein 1
Anxa7	22.2806	8	0	30.059	27.1423	8	Q07076;A0A2C9F2D2;A0A286YCW4	Q07076;A0A2C9F2D2	Annexin A7
Acadvl	22.2718	23	0	83.771	28.3661	25	P50544;B1AR28	P50544;B1AR28	Very long-chain specific acyl-CoA dehydrogenase, mitochondrial
Dhx15	22.2665	12	0	24.991	27.8173	12	O35286;Q497W9;A0A0G2JG10;A0A0G2JGQ5	O35286;Q497W9;A0A0G2JG10	Pre-mRNA-splicing factor ATP-dependent RNA helicase DHX15
Src	22.2655	20	0	70.103	28.3053	21	P05480;Q04736;Q0VBH4;F8VQL0;Q62270;Q922K9;Q62190;P16056	P05480	Neuronal proto-oncogene tyrosine-protein kinase Src
Ptpn1	22.2642	13	0	62.589	27.9507	19	P35821	P35821	Tyrosine-protein phosphatase non-receptor type 1
Ndufa5	22.2628	5	0	11.988	26.5764	5	Q9CPP6;D3YTQ8	Q9CPP6	NADH dehydrogenase [ubiquinone] 1 alpha subcomplex subunit 5
P2rx4	22.2618	8	0	25.397	27.4674	10	D3Z5U5;Q9Z257;Q9JJX6;D3YYR5;Q9Z256;A0A0G2JEP2	D3Z5U5;Q9Z257;Q9JJX6;D3YYR5;Q9Z256	P2X purinoceptor;P2X purinoceptor 4
Dazap1	22.2544	4	0	20.83	27.109	4	Q9JII5;Q3UGB5;D3Z4J1	Q9JII5;Q3UGB5;D3Z4J1	DAZ-associated protein 1
Znf706	22.2513	2	0	3.6638	23.8362	1	Q9D115	Q9D115	Zinc finger protein 706
Ostc	22.2498	1	0	4.6741	24.8348	1	Q78XF5	Q78XF5	Oligosaccharyltransferase complex subunit OSTC
Twf1	22.2487	8	0	75.128	27.5191	11	Q91YR1;D3Z2H0	Q91YR1	Twinfilin-1
C1qbp	22.2468	5	0	46.196	27.4913	11	Q8R5L1;O35658	Q8R5L1;O35658	Complement component 1 Q subcomponent-binding protein, mitochondrial
Pdxk	22.2453	8	0	22.194	27.5999	11	Q8K183	Q8K183	Pyridoxal kinase
Rasa3	22.2449	33	0	118.2	28.9949	37	Q60790	Q60790	Ras GTPase-activating protein 3
Eif3d	22.2444	14	0	55.877	27.4964	17	O70194;A0A2R8VK20	O70194	Eukaryotic translation initiation factor 3 subunit D
Etf1	22.2423	11	0	35.671	27.5316	12	Q8BWY3	Q8BWY3	Eukaryotic peptide chain release factor subunit 1
Ppid	22.2375	11	0	36.807	27.8062	17	Q9CR16	Q9CR16	Peptidyl-prolyl cis-trans isomerase D
Erlin2	22.2364	11	0	32.6	27.0758	12	Q8BFZ9;A0A1B0GT70;A0A1B0GQZ0;A0A1B0GSD8;A0A1B0GT43;A0A1B0GRQ1;Q91X78;A0A1B0GRG7;E9PUH5	Q8BFZ9;A0A1B0GT70	Erlin-2
Ighg2c	22.2348	2	0	6.3031	25.6986	2	A0A0A6YY53;F6TQW2;P01864;P01863;P01865	A0A0A6YY53;F6TQW2;P01864	Ig gamma-2A chain C region secreted form
Ubash3b	22.2319	18	0	59.38	28.4999	23	Q8BGG7;D3YVT5	Q8BGG7	Ubiquitin-associated and SH3 domain-containing protein B
Spr	22.2298	11	0	36.879	26.8339	9	G3UXX3;Q91XH5;Q64105;G3UZ79	G3UXX3;Q91XH5;Q64105;G3UZ79	Sepiapterin reductase
Ufc1	22.2281	4	0	7.2746	26.5542	5	Q9CR09;M0QWS4	Q9CR09;M0QWS4	Ubiquitin-fold modifier-conjugating enzyme 1
Lmna	22.224	23	0	98.903	28.6929	24	P48678;D3YUF7	P48678	Prelamin-A/C;Lamin-A/C
Rad23b	22.2131	7	0	34.482	26.3327	9	P54728	P54728	UV excision repair protein RAD23 homolog B
Psmb5	22.208	10	0	28.784	27.2693	10	O55234;Q8BTY5	O55234	Proteasome subunit beta type-5
Cd9	22.2076	5	0	40.27	28.5284	16	P40240	P40240	CD9 antigen
Adam10	22.206	14	0	63.111	28.2034	21	O35598;E9PYF2;D3Z1E6	O35598;E9PYF2	Disintegrin and metalloproteinase domain-containing protein 10
Spta1	22.1994	101	0	323.31	30.9358	124	P08032	P08032	Spectrin alpha chain, erythrocytic 1
Hsd17b8;H2-Ke6	22.1958	6	0	13.729	26.2107	5	P50171;G3UX44;A0A494BA51;A0A494BAF4	P50171;G3UX44	Estradiol 17-beta-dehydrogenase 8
Plcg2	22.1936	34	0	160.97	29.016	39	Q8CIH5	Q8CIH5	1-phosphatidylinositol 4,5-bisphosphate phosphodiesterase gamma-2
Nedd8	22.1934	2	0	7.4662	25.9587	4	P29595	P29595	NEDD8
Snx5	22.1886	14	0	29.133	27.6132	14	Q9D8U8	Q9D8U8	Sorting nexin-5
Rab3il1	22.1879	3	0	10.377	25.9952	2	D3Z585;D3YZ86;A0A571BDP7;Q8VDV3;D3YZN2;D3YXL8	D3Z585;D3YZ86;A0A571BDP7;Q8VDV3	Guanine nucleotide exchange factor for Rab-3A
Arl6ip1	22.1875	1	0	2.7494	24.5095	1	A0A0U1RPY6;Q9JKW0	A0A0U1RPY6;Q9JKW0	ADP-ribosylation factor-like protein 6-interacting protein 1
Ap2m1	22.1816	12	0	47.057	28.1804	16	Q3TWV4;P84091;A0A338P798;A0A338P6T4	Q3TWV4;P84091	AP-2 complex subunit mu
Fau	22.1776	1	0.00058754	2.1792	23.1776	1	A0A494B9Z0;A0A494BBA8;Q642K5;P62862	A0A494B9Z0;A0A494BBA8;Q642K5;P62862	40S ribosomal protein S30
Itgad	22.1767	25	0	68.887	28.6277	30	H3BKX8;E9PXZ7;Q3V0T4;H3BJS4	H3BKX8;E9PXZ7;Q3V0T4	Integrin alpha-D
Hsd17b11	22.1767	10	0	27.397	26.9546	12	Q9EQ06	Q9EQ06	Estradiol 17-beta-dehydrogenase 11
Ssb	22.1758	10	0	38.59	27.7723	15	P32067;D6RI87;F6SXM5	P32067;D6RI87	Lupus La protein homolog
Armc10	22.1755	6	0	67.301	25.9544	6	Q9D0L7;D3Z5T2	Q9D0L7;D3Z5T2	Armadillo repeat-containing protein 10
Abcb10	22.1741	17	0	61.546	28.0654	17	Q9JI39	Q9JI39	ATP-binding cassette sub-family B member 10, mitochondrial
Acsl1	22.1638	17	0	54.176	27.8411	20	D3Z041;P41216;F6WNZ2;D3Z457;D3YVF6	D3Z041;P41216	Long-chain-fatty-acid--CoA ligase 1
Aldh18a1	22.1634	24	0	101.19	28.8657	30	Q9Z110;D3Z0B4;H3BKJ8;H3BLE8;H3BKK0	Q9Z110	Delta-1-pyrroline-5-carboxylate synthase;Glutamate 5-kinase;Gamma-glutamyl phosphate reductase
Nutf2	22.1626	5	0	27.65	25.823	7	P61971;A0A1D5RLR1	P61971	Nuclear transport factor 2
Ndufb5	22.1601	7	0	12.635	26.2479	7	D3Z568;Q9CQH3;F6Y6V5;D3YX99;D3Z6W9	D3Z568;Q9CQH3	NADH dehydrogenase [ubiquinone] 1 beta subcomplex subunit 5, mitochondrial
Ndufa10	22.1585	12	0	39.906	27.8095	16	Q99LC3;A0A087WR38	Q99LC3	NADH dehydrogenase [ubiquinone] 1 alpha subcomplex subunit 10, mitochondrial
Sf3b5	22.1557	2	0	4.8401	24.9841	3	Q923D4	Q923D4	Splicing factor 3B subunit 5
Hdgf	22.147	9	0	25.02	27.3846	12	P51859;E0CXA0;E0CYW7	P51859;E0CXA0	Hepatoma-derived growth factor
Nars	22.1447	15	0	51.217	28.0082	17	A0A498WGK2;Q8BP47;A0A494BAX5;A0A494BB89;A0A494B927;A0A494BAW6;A0A494B996	A0A498WGK2;Q8BP47;A0A494BAX5;A0A494BB89	Asparagine--tRNA ligase, cytoplasmic
Adh5	22.1447	16	0	83.021	27.9639	22	P28474;A0A0G2JGS3;Q64437	P28474	Alcohol dehydrogenase class-3
Ubqln4	22.144	1	0.0025612	1.8143	23.144	1	A0A0A6YXU5;Q99NB8	A0A0A6YXU5;Q99NB8	Ubiquilin-4
Psmc5	22.143	13	0	55.346	27.8298	13	P62196;Q8K1K2	P62196;Q8K1K2	26S protease regulatory subunit 8
Ppt2	22.1373	2	0	12.399	24.9447	2	E9Q0T0;G5E8W7;F6SPQ1;O35448;E9PVM9	E9Q0T0;G5E8W7;F6SPQ1;O35448;E9PVM9	Lysosomal thioesterase PPT2
Pfdn1	22.1365	3	0	10.115	25.4977	3	Q9CQF7;Q9CWM4;A0A494BBK3;A0A494BAH5	Q9CQF7;Q9CWM4;A0A494BBK3;A0A494BAH5	Prefoldin subunit 1
Csnk2b	22.1362	2	0	4.2532	25.0138	2	G3UXG7;G3UXU2;G3UZJ5;P67871;G3UZA4;G3UZX4	G3UXG7;G3UXU2;G3UZJ5;P67871;G3UZA4;G3UZX4	Casein kinase II subunit beta
Rbm3	22.1325	4	0	32.539	28.3454	9	O89086;Q8BG13;S4R2M6	O89086;Q8BG13;S4R2M6	RNA-binding protein 3
Cuta	22.1262	3	0	10.9	25.0151	3	D5MCW4;Q9CQ89	D5MCW4;Q9CQ89	Protein CutA
Ifi30	22.1261	6	0	19.968	27.3277	11	Q9ESY9	Q9ESY9	Gamma-interferon-inducible lysosomal thiol reductase
Idh3b	22.1244	12	0	50.996	27.8053	15	Q91VA7;A0A668KL51;V9GXV0	Q91VA7;A0A668KL51	Isocitrate dehydrogenase [NAD] subunit, mitochondrial
Rpl22l1	22.1241	3	0	24.798	27.1602	5	Q9D7S7	Q9D7S7	60S ribosomal protein L22-like 1
Pin1	22.1227	3	0	4.0803	25.4446	2	Q9QUR7	Q9QUR7	Peptidyl-prolyl cis-trans isomerase NIMA-interacting 1
Rras	22.1224	5	0	10.067	26.4473	5	P10833;A0A1B0GRG1;A0A1B0GRT5;P62071	P10833;A0A1B0GRG1	Ras-related protein R-Ras
Atp5j	22.1219	2	0	8.6457	24.4438	2	P97450;E9QAD6	P97450;E9QAD6	ATP synthase-coupling factor 6, mitochondrial
Apoa1bp	22.1191	6	0	50.622	27.2146	7	Q8K4Z3	Q8K4Z3	NAD(P)H-hydrate epimerase
Sgce	22.1164	1	0.0071665	1.4744	26.1164	1	F6WKE4;D3Z572;E9PX46;F6R6P2;F8WGM3;O70258	F6WKE4;D3Z572;E9PX46;F6R6P2;F8WGM3;O70258	Epsilon-sarcoglycan
Copb2	22.1145	23	0	82.619	28.5496	23	O55029	O55029	Coatomer subunit beta
Eif3i	22.1123	12	0	49.194	27.9834	13	Q9QZD9;A2AE03	Q9QZD9	Eukaryotic translation initiation factor 3 subunit I
Ehd3	22.1035	13	0	49.727	27.9407	21	Q9QXY6	Q9QXY6	EH domain-containing protein 3
Lsm3	22.1013	1	0.0055556	1.5806	23.6862	1	P62311	P62311	U6 snRNA-associated Sm-like protein LSm3
Nup133	22.1	5	0	10.321	28.099	6	Q8R0G9	Q8R0G9	Nuclear pore complex protein Nup133
Htra2	22.0994	9	0	45.735	27.0259	12	D3YX27;Q9JIY5;F6TCV0;D3YX28;F6XUR8;S4R1B3;S4R1A8;A2RT60	D3YX27;Q9JIY5;F6TCV0;D3YX28;F6XUR8;S4R1B3	Serine protease HTRA2, mitochondrial
Ap1b1	22.0992	16	0	53.887	28.0989	16	Q5SVG5;Q5SVG4;O35643	Q5SVG5;Q5SVG4;O35643	AP-1 complex subunit beta-1
Stt3a	22.094	9	0	22.981	27.2913	9	P46978;D3YZN5	P46978	Dolichyl-diphosphooligosaccharide--protein glycosyltransferase subunit STT3A
Apom	22.0916	1	0.0033642	1.6695	24.8989	1	Q9Z1R3	Q9Z1R3	Apolipoprotein M
Vps35	22.0892	21	0	94.325	28.2516	23	Q9EQH3	Q9EQH3	Vacuolar protein sorting-associated protein 35
Denr	22.085	3	0	50.479	25.2888	3	E9Q0G1;Q9CQJ6	E9Q0G1;Q9CQJ6	Density-regulated protein
Vapb	22.0811	3	0	6.2686	26.4437	4	Q8BH80;Q9QY76	Q8BH80;Q9QY76	Vesicle-associated membrane protein-associated protein B
Arf4	22.0793	4	0	8.5129	25.4526	4	P61750;E9Q798;F6UFB9	P61750;E9Q798	ADP-ribosylation factor 4
Apoo	22.0759	4	0	17.54	25.5158	4	Q9DCZ4	Q9DCZ4	Apolipoprotein O
Ighg1	22.0755	6	0	22.83	26.8257	8	A0A075B5P4;A0A0A6YWR2;P01868;P01869	A0A075B5P4;A0A0A6YWR2;P01868;P01869	Ig gamma-1 chain C region secreted form;Ig gamma-1 chain C region, membrane-bound form
Arnt	22.0731	1	0.002291	1.8804	25.073	1	F7C9F6	F7C9F6
Stk24	22.0709	13	0	54.342	27.6463	16	Q99KH8;D3Z359;Q9Z2W1	Q99KH8	Serine/threonine-protein kinase 24;Serine/threonine-protein kinase 24 35 kDa subunit;Serine/threonine-protein kinase 24 12 kDa subunit
Tceb1	22.0674	4	0	19.96	26.1423	6	A0A087WQE6;A0A087WNT1;P83940;A0A087WPE4	A0A087WQE6;A0A087WNT1;P83940;A0A087WPE4	Transcription elongation factor B polypeptide 1
Ppp3ca	22.0631	10	0	21.086	26.7107	11	P63328	P63328	Serine/threonine-protein phosphatase 2B catalytic subunit alpha isoform
Dync1h1	22.0625	142	0	323.31	31.3926	163	Q9JHU4;F6ZX84	Q9JHU4	Cytoplasmic dynein 1 heavy chain 1
Ap1m1	22.0544	11	0	29.417	27.6616	13	P35585;A0A0R4IZX6;A0A0R4J1L4;Q9WVP1;A0A1D5RLL9;A0A1D5RMJ1;A0A1D5RLW6;D3YZ71;A0A1L1SUA0	P35585	AP-1 complex subunit mu-1
Psmc3	22.0538	14	0	52.912	27.9007	22	A2AGN7;B7ZCF1;O88685	A2AGN7;B7ZCF1;O88685	26S protease regulatory subunit 6A
Stard10	22.0535	2	0	5.6097	25.0535	3	G3UYM0;G3UY59;Q9JMD3;G3UW37;G3UY87;E9PVP0	G3UYM0;G3UY59;Q9JMD3;G3UW37;G3UY87;E9PVP0	PCTP-like protein
Ctrl	22.053	5	0	17.944	26.0273	5	Q9ER05	Q9ER05
H2-Eb1	22.0528	6	0	13.081	26.3802	7	O78196;A0A498U6I0;P20040;P04231;P18468;P04230;P01915	O78196;A0A498U6I0;P20040;P04231;P18468;P04230;P01915	H-2 class II histocompatibility antigen, E-Q beta chain;H-2 class II histocompatibility antigen, E-S beta chain;H-2 class II histocompatibility antigen, I-A beta chain;H-2 class II histocompatibility antigen, E-B beta chain;H-2 class II histocompatibility antigen, E-D beta chain
Nme1	22.0503	3	0	13.809	25.7944	5	P15532;Q5NC80;Q5NC79	P15532;Q5NC80;Q5NC79	Nucleoside diphosphate kinase A;Nucleoside diphosphate kinase
Ppp2r4	22.0492	8	0	36.923	27.1991	12	P58389;A2AWE9;B7ZDE0;A2AWF0;F6Z6I0	P58389;A2AWE9	Serine/threonine-protein phosphatase 2A activator
G3bp1	22.0449	14	0	42.117	28.6334	20	P97855	P97855	Ras GTPase-activating protein-binding protein 1
Farsa	22.0422	14	0	56.837	27.7533	14	Q8C0C7;E9PWY9;D6RIJ2	Q8C0C7;E9PWY9	Phenylalanine--tRNA ligase alpha subunit
Tbca	22.042	1	0	20.032	24.6269	1	A0A1Y7VJ48;P48428	A0A1Y7VJ48;P48428	Tubulin-specific chaperone A
Sh3glb1	22.0356	8	0	36.128	26.5429	8	A0A0G2JEC4;Q9JK48;A0A0G2JE45;A0A0G2JF57	A0A0G2JEC4;Q9JK48	Endophilin-B1
Ndufv2	22.0326	9	0	24.041	27.3042	10	Q9D6J6;M0QWP9;D6RGN4	Q9D6J6	NADH dehydrogenase [ubiquinone] flavoprotein 2, mitochondrial
Eif3a	22.0282	32	0	91.54	29.0043	42	P23116;A0A494B9I0	P23116	Eukaryotic translation initiation factor 3 subunit A
Eif4a3;Gm8994	22.025	12	0	32.264	27.353	15	Q91VC3;A0A0N4SVP8;A2AFK7;E9PV04;A0A0N4SVM5	Q91VC3;A0A0N4SVP8;A2AFK7;E9PV04;A0A0N4SVM5	Eukaryotic initiation factor 4A-III;Eukaryotic initiation factor 4A-III, N-terminally processed
Farsb	22.0216	16	0	42.584	27.6718	17	Q9WUA2;A0A087WS80;A0A087WPV4;A0A087WQ15	Q9WUA2	Phenylalanine--tRNA ligase beta subunit
Prkacb	22.02	11	0	30.959	27.0572	12	P68181;H6TMF5;A0A0G2JFT9	P68181	cAMP-dependent protein kinase catalytic subunit beta
Rac2	22.0195	4	0	12.393	27.0538	7	Q05144;A0A2R8VHH0	Q05144;A0A2R8VHH0	Ras-related C3 botulinum toxin substrate 2
Atp2a2	22.0181	17	0	69.426	28.6637	25	O55143	O55143	Sarcoplasmic/endoplasmic reticulum calcium ATPase 2
Kif2a	22.0147	12	0	43.252	27.595	14	F8VQ42;E0CZ72;P28740;Q8C0N1	F8VQ42;E0CZ72;P28740	Kinesin-like protein;Kinesin-like protein KIF2A
Vps26a	22.013	8	0	30.986	26.6197	9	P40336;A0A1W2P7R7;A0A1W2P7Z9	P40336	Vacuolar protein sorting-associated protein 26A
Sptbn1	22.0052	70	0	323.01	30.5989	83	Q62261;A0A0A0MQG2;Q68FG2;A0A494BBH5	Q62261;A0A0A0MQG2	Spectrin beta chain, non-erythrocytic 1
Mri1	22.0037	12	0	50.267	28.0609	14	Q9CQT1;F6YY88;F8WI95	Q9CQT1	Methylthioribose-1-phosphate isomerase
Cers2	22.0026	2	0	4.2591	24.81	2	D3Z4M2;D3YTM0;D3Z0Z2;Q924Z4	D3Z4M2;D3YTM0;D3Z0Z2;Q924Z4	Ceramide synthase 2
Serpinb2	22.0018	9	0	60.682	26.9977	9	P12388;F6ZFV0	P12388	Plasminogen activator inhibitor 2, macrophage
Ezr	21.9993	11	0	53.237	27.5815	19	P26040	P26040	Ezrin
0610037L13Rik	21.9971	1	0	3.0949	24.319	1	A2A8E4;D6REH4;A2A8E2;B7ZC72;B7ZC71;Q8BHG2	A2A8E4;D6REH4;A2A8E2;B7ZC72;B7ZC71;Q8BHG2	UPF0587 protein C1orf123 homolog
Map2k2	21.9956	10	0	34.464	27.2569	12	Q91YS7;Q63932;A0A1W2P7V9;M0QWN2;D3Z446	Q91YS7;Q63932	Dual specificity mitogen-activated protein kinase kinase 2
Ndufa9	21.9883	14	0	74.955	28.4064	23	A0A0R3P9C8;Q9DC69	A0A0R3P9C8;Q9DC69	NADH dehydrogenase [ubiquinone] 1 alpha subcomplex subunit 9, mitochondrial
Khdrbs1	21.9866	4	0	15.33	25.7592	6	Q60749	Q60749	KH domain-containing, RNA-binding, signal transduction-associated protein 1
Usp5	21.9841	24	0	91.56	28.6132	34	Q3U4W8;P56399;D3YYA5;D3Z4K7	Q3U4W8;P56399	Ubiquitin carboxyl-terminal hydrolase;Ubiquitin carboxyl-terminal hydrolase 5
Spata5;Katnal2	21.983	2	0.00029499	2.236	27.7494	2	A0A0A0MQ80;Q3UMC0;D3Z0U5;D6RGM7;D3Z4J2;A0A0G2JFY0;Q9D3R6	A0A0A0MQ80;Q3UMC0;D3Z0U5;D6RGM7;D3Z4J2;A0A0G2JFY0;Q9D3R6	Spermatogenesis-associated protein 5;Katanin p60 ATPase-containing subunit A-like 2
Wasf2	21.9799	5	0	15.154	26.5455	5	Q8BH43;B1AUN0	Q8BH43	Wiskott-Aldrich syndrome protein family member 2
Cela1	21.9799	5	0	52.403	26.7027	5	Q91X79;A0A2R8VK43	Q91X79;A0A2R8VK43	Chymotrypsin-like elastase family member 1
Trappc3	21.9755	3	0	9.6607	25.1454	3	O55013	O55013	Trafficking protein particle complex subunit 3
Gng12	21.9748	3	0	12.517	25.4701	4	A0A0N4SVT3;A0A0N4SW28;Q9DAS9	A0A0N4SVT3;A0A0N4SW28;Q9DAS9	Guanine nucleotide-binding protein G(I)/G(S)/G(O) subunit gamma-12
Ighv2-2	21.972	1	0	6.9476	23.557	1	A0A075B5P8	A0A075B5P8
Lcp2	21.9634	18	0	63.452	27.9106	20	Q60787;B1ATD1	Q60787;B1ATD1	Lymphocyte cytosolic protein 2
Pgm2	21.9603	12	0	55.894	27.7423	12	Q7TSV4;A0A0G2JF47	Q7TSV4	Phosphoglucomutase-2
Gmfb	21.9596	4	0	13.414	25.4045	4	Q9CQI3;A0A2I3BR94;A0A2I3BPS1	Q9CQI3;A0A2I3BR94;A0A2I3BPS1	Glia maturation factor beta
Tcirg1	21.9569	12	0	35.168	27.3067	12	Q9JHF5;F6XRE6;F6ZFB8;A0A494B9E3	Q9JHF5;F6XRE6	V-type proton ATPase subunit a
Ctss	21.9561	7	0	38.617	26.2671	7	F6WR04;O70370	F6WR04;O70370	Cathepsin S
Angpt1	21.9475	8	0	35.232	27.3013	8	O08538	O08538	Angiopoietin-1
Aldh4a1	21.9426	9	0	50.568	26.9252	12	Q8CHT0	Q8CHT0	Delta-1-pyrroline-5-carboxylate dehydrogenase, mitochondrial
Ndufa6	21.9354	3	0	6.1189	25.0281	3	Q9CQZ5;A0A2R8W6V1;A0A2R8VI90	Q9CQZ5	NADH dehydrogenase [ubiquinone] 1 alpha subcomplex subunit 6
Capg	21.9331	6	0	24.626	26.1816	10	Q99LB4;P24452;D3YTL5;D3YZN3;D3YU77;D3Z014;D3Z4K5	Q99LB4;P24452;D3YTL5	Macrophage-capping protein
Acad9	21.931	19	0	57.636	27.6869	24	Q8JZN5;A0A0G2JDY4;A0A0G2JF25	Q8JZN5	Acyl-CoA dehydrogenase family member 9, mitochondrial
Cpb1	21.9273	17	0	82.059	27.8607	20	B2RS76	B2RS76
Pycrl	21.9237	4	0	13.305	26.0434	4	Q9DCC4	Q9DCC4	Pyrroline-5-carboxylate reductase 3
Rpia	21.9203	7	0	18.076	26.5307	7	P47968	P47968	Ribose-5-phosphate isomerase
Fam213a	21.919	7	0	12.2	26.2495	9	Q3U125;Q9CYH2;D3YYG8;D3Z398;D3Z252;D3Z0A8;D3Z143;D3YWL4	Q3U125;Q9CYH2;D3YYG8;D3Z398;D3Z252;D3Z0A8	Redox-regulatory protein FAM213A
Ppp6c	21.917	8	0	26.987	26.848	11	Q9CQR6;A0A0N4SVL9;A0A0N4SVE2	Q9CQR6;A0A0N4SVL9	Serine/threonine-protein phosphatase 6 catalytic subunit;Serine/threonine-protein phosphatase 6 catalytic subunit, N-terminally processed
Eif3b	21.9165	31	0	117.21	29.1943	37	Q8JZQ9;A0A0G2JG48	Q8JZQ9	Eukaryotic translation initiation factor 3 subunit B
Pura	21.9143	6	0	33.81	26.2122	9	P42669	P42669	Transcriptional activator protein Pur-alpha
2009-09-01	21.908	12	0	102.57	28.1379	18	A2A6U3;Q80UG5;A2A6U5;A8Y5D3	A2A6U3;Q80UG5	Septin-9
Ap2a2	21.9037	26	0	105.92	28.7439	29	P17427;A0A140LHG0	P17427	AP-2 complex subunit alpha-2
Chchd1	21.8991	1	0	4.2293	23.4841	1	Q05BF0;Q9CQA6	Q05BF0;Q9CQA6	Coiled-coil-helix-coiled-coil-helix domain-containing protein 1
Mmgt1	21.8976	1	0	18.195	24.2195	1	Q8K273	Q8K273	Membrane magnesium transporter 1
Cacybp	21.8943	9	0	37.754	27.2763	11	Q9CXW3;A0A0A6YY29	Q9CXW3	Calcyclin-binding protein
Iglc3;Iglc2	21.8923	3	0	60.936	25.5692	4	Q99JC1;A0A0G2JGQ8;P01845;P01844	Q99JC1;A0A0G2JGQ8;P01845;P01844	Ig lambda-3 chain C region;Ig lambda-2 chain C region
Rtn4	21.8915	7	0	39.58	28.4514	11	Q99P72	Q99P72	Reticulon-4
Slc7a5	21.8904	3	0	6.0115	26.5035	3	Q9Z127	Q9Z127	Large neutral amino acids transporter small subunit 1
Fkbp3	21.8861	4	0	17.022	26.1085	4	A0A1Y7VLK0;Q62446;A0A1Y7VMJ9;A0A1Y7VP01;A0A1Y7VJ86	A0A1Y7VLK0;Q62446;A0A1Y7VMJ9;A0A1Y7VP01	Peptidyl-prolyl cis-trans isomerase FKBP3
Gnpda1	21.8834	11	0	39.576	26.9558	11	O88958;A0A494B9X2;D3Z0R5;A0A494BB68	O88958;A0A494B9X2;D3Z0R5;A0A494BB68	Glucosamine-6-phosphate isomerase 1
Sqrdl	21.8824	12	0	35.492	27.0563	12	Q9R112;F6ZKZ3;H3BLH2	Q9R112;F6ZKZ3	Sulfide:quinone oxidoreductase, mitochondrial
Nono	21.881	9	0	41.226	27.7701	12	Q99K48;B1AXT0	Q99K48	Non-POU domain-containing octamer-binding protein
Cst3	21.8789	3	0	10.222	26.4516	4	P21460;A2APX3	P21460;A2APX3	Cystatin-C
Esyt1	21.8783	32	0	104	28.6175	39	Q3U7R1;A0A1W2P784	Q3U7R1	Extended synaptotagmin-1
Mcm6	21.8767	24	0	79.386	28.5562	29	P97311;Q3ULG5	P97311;Q3ULG5	DNA replication licensing factor MCM6;DNA helicase
Scamp3	21.8728	7	0	31.608	26.1842	7	E9Q855;Q3UXS0;O35609	E9Q855;Q3UXS0;O35609	Secretory carrier-associated membrane protein 3
Tmco1	21.8705	3	0	8.079	25.5264	3	A0A0A6YVS2;Q921L3	A0A0A6YVS2;Q921L3	Transmembrane and coiled-coil domain-containing protein 1
Inpp5d	21.8704	28	0	117.21	28.7259	35	Q9ES52;F7BZA7;A0A087WPT7;Q6P549	Q9ES52	Phosphatidylinositol 3,4,5-trisphosphate 5-phosphatase 1
Sh3bgrl2	21.8665	2	0	4.0284	25.317	3	A0A087WS96;Q8BG73	A0A087WS96;Q8BG73	SH3 domain-binding glutamic acid-rich-like protein;SH3 domain-binding glutamic acid-rich-like protein 2
Snx1	21.865	9	0	26.347	27.1078	9	Q9WV80;Q6NZD2;D3YWH1	Q9WV80;Q6NZD2	Sorting nexin-1
Surf4	21.8629	2	0	8.9081	25.6973	8	Q64310;E0CXD9	Q64310;E0CXD9	Surfeit locus protein 4
Ppil1	21.8611	2	0	8.4901	24.8611	4	Q9D0W5	Q9D0W5	Peptidyl-prolyl cis-trans isomerase-like 1
Psmc4	21.8599	15	0	40.14	27.7477	22	P54775;A0A140LIZ5	P54775;A0A140LIZ5	26S protease regulatory subunit 6B
Pyhin1;BC094916	21.8598	10	0	24.478	27.0532	11	Q8BV49;A0A0A6YXV9;E9PVL3;Q504N7;E9QL87;A0A0R4J1R5	Q8BV49;A0A0A6YXV9;E9PVL3;Q504N7;E9QL87;A0A0R4J1R5	Pyrin and HIN domain-containing protein 1;Pyrin and HIN domain-containing protein 1-like
2015-09-01	21.8595	3	0	13.865	25.0295	3	A0A0R4J0K1;Q9ERR7	A0A0R4J0K1;Q9ERR7	15 kDa selenoprotein
Prosc	21.8581	8	0	27.75	27.1425	7	A0A1B0GRP7;Q9Z2Y8;A0A1B0GRR5;Q6P8V7;A0A1B0GQY5;A0A1B0GSP5;Q80ZV3;A0A1B0GSA1	A0A1B0GRP7;Q9Z2Y8;A0A1B0GRR5;Q6P8V7;A0A1B0GQY5	Proline synthase co-transcribed bacterial homolog protein
Hnrnph2	21.858	7	0	56.101	27.9132	13	P70333	P70333	Heterogeneous nuclear ribonucleoprotein H2
Ganab	21.8578	34	0	150.74	29.8396	46	Q8BHN3	Q8BHN3	Neutral alpha-glucosidase AB
Atp6v1h	21.8549	13	0	38.892	27.2806	15	A0A0A6YX18;Q8BVE3;A0A0A6YWP6;A0A0A6YVU0;A0A0A6YW86	A0A0A6YX18;Q8BVE3;A0A0A6YWP6	V-type proton ATPase subunit H
Ctsl	21.8545	1	0	9.9253	23.4395	1	A0A1Y7VP49;A0A1Y7VNM3;P06797	A0A1Y7VP49;A0A1Y7VNM3;P06797	Cathepsin L1;Cathepsin L1 heavy chain;Cathepsin L1 light chain
Copa	21.8538	38	0	137.23	29.0125	48	Q8CIE6;F8WHL2;F6XJN3	Q8CIE6;F8WHL2	Coatomer subunit alpha;Xenin;Proxenin;Coatomer subunit alpha
Arf6	21.8469	6	0	14.004	26.8787	10	P62331	P62331	ADP-ribosylation factor 6
Hsd17b12	21.8454	8	0	28.832	27.3095	10	O70503	O70503	Very-long-chain 3-oxoacyl-CoA reductase
Urod	21.8451	10	0	53.836	26.77	12	P70697;A0A0A0MQG7	P70697	Uroporphyrinogen decarboxylase
Eif1ax;Eif1a	21.8451	5	0	22.693	26.5928	6	Q8BMJ3;A0A494BB95;Q60872;J3QNT6;Q3UTA4;Q3TQZ4;J3QQ02;J3QPI8;J3QP87;A0A1Y7VNG9;A0A1Y7VLT7;A0A1Y7VK80;A0A1Y7VJE9	Q8BMJ3;A0A494BB95;Q60872	Eukaryotic translation initiation factor 1A, X-chromosomal;Eukaryotic translation initiation factor 1A
Calu	21.8415	9	0	24.936	27.4126	11	O35887;Q6XLQ8;G3UWV3;G3V004;G3UXA3;G3UY49;G3UWR0;G3UXA8	O35887;Q6XLQ8;G3UWV3;G3V004	Calumenin
Pitrm1	21.8386	34	0	145.84	29.4385	43	Q8K411	Q8K411	Presequence protease, mitochondrial
Dynlt1	21.8368	2	0	43.137	25.9518	4	A0A338P7B7;P51807	A0A338P7B7;P51807	Dynein light chain Tctex-type 1
Lrpap1	21.835	3	0	7.3161	24.6423	2	F6WMD1;P55302	F6WMD1;P55302	Alpha-2-macroglobulin receptor-associated protein
Xpnpep1	21.8349	17	0	83.503	27.9099	20	Q3UE92;Q6P1B1;A0A494BBG8;S4R1I3;S4R228	Q3UE92;Q6P1B1;A0A494BBG8;S4R1I3	Xaa-Pro aminopeptidase 1
Tpm1	21.8345	7	0	27.315	27.8113	10	F8WID5	F8WID5
Ralb	21.8328	2	0.00030276	2.5217	25.0028	2	Q9JIW9;F6QC68	Q9JIW9;F6QC68	Ras-related protein Ral-B
Hnrnpul2	21.8328	14	0	49.489	27.9421	15	Q00PI9	Q00PI9	Heterogeneous nuclear ribonucleoprotein U-like protein 2
Ppp1r7	21.8317	11	0	61.197	27.4569	13	Q3UM45;A0A087WRA7	Q3UM45	Protein phosphatase 1 regulatory subunit 7
	21.8291	1	0	8.6476	24.4141	1	Q9D735	Q9D735	Uncharacterized protein C19orf43 homolog
Fscn1	21.8282	12	0	56.502	27.4904	13	Q61553;A0A0G2JDU7;F7BDR1	Q61553;A0A0G2JDU7	Fascin
Bak1	21.8198	5	0	22.668	24.6521	6	F7CUQ1;Q91WX5;O08734	F7CUQ1;Q91WX5;O08734	Bcl-2 homologous antagonist/killer
Rab5b	21.8191	2	0	6.5387	25.2785	2	P61021	P61021	Ras-related protein Rab-5B
Tollip	21.8189	5	0	19.973	26.1343	5	Q8C5G6;Q9QZ06;A9JEI5;F7AT44	Q8C5G6;Q9QZ06;A9JEI5;F7AT44	Toll-interacting protein
Pmm2	21.8168	7	0	16.478	26.6058	8	Q9Z2M7;Q9D6D9;Q91W01;A0A2R8W6J8;O35621	Q9Z2M7	Phosphomannomutase 2
	21.8147	10	0	36.598	26.8014	10	Q91V76;A0A1L1SSF8;A0A1L1ST86	Q91V76;A0A1L1SSF8	Ester hydrolase C11orf54 homolog
Fen1	21.8111	7	0	39.796	26.6203	7	Q91Z50;P39749	Q91Z50;P39749	Flap endonuclease 1
Sacm1l	21.8091	12	0	34.323	27.7016	15	Q9EP69;A0A5F8MPK9;A0A1L1SR59	Q9EP69;A0A5F8MPK9	Phosphatidylinositide phosphatase SAC1
Isoc1	21.808	6	0	23.929	26.5416	9	Q91V64;A0A494B952	Q91V64;A0A494B952	Isochorismatase domain-containing protein 1
Tomm70a	21.8025	11	0	51.797	27.64	14	Q9CZW5	Q9CZW5	Mitochondrial import receptor subunit TOM70
Gorasp2	21.7997	5	0	31.937	25.581	7	A2ATI9;Q99JX3;A2ATI8;A2ATI6	A2ATI9;Q99JX3;A2ATI8;A2ATI6	Golgi reassembly-stacking protein 2
Dpy30	21.7996	2	0	6.3076	24.7888	3	Q99LT0	Q99LT0	Protein dpy-30 homolog
Ruvbl1	21.798	11	0	53.808	27.1077	12	P60122;D3YW60	P60122	RuvB-like 1
Comt	21.7961	6	0	25.788	26.2948	9	O88587;D3Z227	O88587	Catechol O-methyltransferase
Gbas	21.7914	6	0	15.082	27.8427	8	O55126;Q7TMG8;A0A0G2JEV1	O55126;Q7TMG8	Protein NipSnap homolog 2
Dhrs1	21.7903	14	0	36.93	28.8365	17	Q99L04	Q99L04	Dehydrogenase/reductase SDR family member 1
Ola1	21.7901	10	0	33.85	27.0869	10	Q9CZ30;B1AYJ9;Q99K73	Q9CZ30;B1AYJ9	Obg-like ATPase 1
Serpinb9	21.7898	11	0	40.479	26.4154	13	O08797;Q8VHQ1;Q8BMT0;Q80UK5;O08806;F6V5V4	O08797
Nadk	21.7874	3	0	15.39	25.4878	3	P58058;A2A9P0;A2A9P2	P58058	NAD kinase
Tcea1	21.7861	7	0	30.349	26.5265	8	P10711;E9PYD5	P10711;E9PYD5	Transcription elongation factor A protein 1
Hadh	21.7817	7	0	50.912	27.5074	15	Q61425	Q61425	Hydroxyacyl-coenzyme A dehydrogenase, mitochondrial
Mydgf	21.7811	2	0	14.526	25.9182	3	Q9CPT4	Q9CPT4	Myeloid-derived growth factor
Anxa3	21.7798	12	0	62.953	27.6628	11	O35639;Q3TET3;A0A0G2JGL7;A0A0G2JDV9	O35639	Annexin A3
Tsn	21.7777	7	0	20.384	26.3094	8	Q62348	Q62348	Translin
Akr7a2	21.7743	7	0	33.989	26.867	8	Q8CG76	Q8CG76	Aflatoxin B1 aldehyde reductase member 2
Casp6	21.7716	9	0	18.292	26.0664	9	O08738	O08738	Caspase-6;Caspase-6 subunit p18;Caspase-6 subunit p11
Psmc2	21.7706	15	0	63.426	27.7283	20	Q8BVQ9;P46471	Q8BVQ9;P46471	26S protease regulatory subunit 7
Sdf2l1	21.7694	4	0	28.682	26.7988	6	Q9ESP1	Q9ESP1	Stromal cell-derived factor 2-like protein 1
Atp6v1f	21.7576	5	0	15.811	25.5327	7	Q9D1K2;A0A0N4SVE1;F7B2B4	Q9D1K2;A0A0N4SVE1;F7B2B4	V-type proton ATPase subunit F
Cand1	21.7564	31	0	104.32	28.6414	36	Q6ZQ38;D3YWC5	Q6ZQ38	Cullin-associated NEDD8-dissociated protein 1
Mcm7	21.7494	20	0	50.515	27.8664	17	Q61881;D3Z6N3;D3Z335;D3Z0J6;D3Z2K9	Q61881	DNA replication licensing factor MCM7
Ecm1	21.7492	10	0	27.824	26.9225	10	F8WI14;Q61508;D3Z772;D3YV64;D3YV22;D3Z0U9;D3Z038	F8WI14;Q61508	Extracellular matrix protein 1
Ndufs7	21.7486	3	0	9.4876	25.315	3	Q9DC70	Q9DC70	NADH dehydrogenase [ubiquinone] iron-sulfur protein 7, mitochondrial
Aldh1a1	21.7432	13	0	77.767	28.4434	14	P24549;A0A286YCZ0;O35945	P24549	Retinal dehydrogenase 1
Uso1	21.7432	19	0	87.17	28.4226	27	Q9Z1Z0;A0A0J9YUG0	Q9Z1Z0	General vesicular transport factor p115
Psmd4	21.7423	5	0	12.598	26.3777	5	O35226;F7AI87	O35226	26S proteasome non-ATPase regulatory subunit 4
Cd38	21.7421	8	0	31.002	26.3442	7	P56528	P56528	ADP-ribosyl cyclase/cyclic ADP-ribose hydrolase 1
Ass1	21.7395	14	0	41.961	27.2745	18	P16460	P16460	Argininosuccinate synthase
Clns1a	21.7355	2	0	4.4591	24.9055	2	Q923F1;Q61189	Q923F1;Q61189	Methylosome subunit pICln
Psmd9	21.7318	5	0	14.463	25.6067	5	Q9CR00;A0A0G2JGN6	Q9CR00;A0A0G2JGN6	26S proteasome non-ATPase regulatory subunit 9
Anxa11	21.7317	9	0	27.284	26.9295	8	P97384;D3Z7U0	P97384;D3Z7U0	Annexin A11;Annexin
Tpm1	21.7294	4	0	11.286	26.5076	5	G5E8R2;E9Q453;G5E8R1;E9Q456;G5E8R0;E9Q455;S4R261	G5E8R2;E9Q453;G5E8R1;E9Q456;G5E8R0;E9Q455
Ipo5	21.728	24	0	126.28	28.6424	31	Q8BKC5	Q8BKC5	Importin-5
Ptbp3	21.7261	10	0	20.58	26.7049	12	G8JL74;G3UXA6;Q8BHD7;G3UZ01;F7C521;G3UY95;G3UXZ6	G8JL74;G3UXA6;Q8BHD7;G3UZ01	Polypyrimidine tract-binding protein 3
Adss	21.7218	10	0	21.191	26.4986	10	P46664	P46664	Adenylosuccinate synthetase isozyme 2
Stx8	21.721	6	0	13.222	25.3656	8	O88983;Q9D0J1;Q8BS59	O88983;Q9D0J1	Syntaxin-8
Pkn1	21.721	6	0	9.8511	27.1697	7	P70268;D6RH37;G3UXH4;G3UZM9;Q8K045;Q8BWW9	P70268;D6RH37	Serine/threonine-protein kinase N1
Psmd2	21.7192	28	0	130.05	29.1065	34	Q8VDM4;A0A338P6M5;E9Q2S8;A0A338P6S9;A0A338P7H4	Q8VDM4	26S proteasome non-ATPase regulatory subunit 2
Fam213b	21.7172	3	0	4.8827	24.7011	3	B1AS14;Q9DB60	B1AS14;Q9DB60	Prostamide/prostaglandin F synthase
Dync1li1	21.7141	17	0	55.411	27.8851	19	Q8R1Q8	Q8R1Q8	Cytoplasmic dynein 1 light intermediate chain 1
Psmd12	21.7136	12	0	64.791	27.6142	16	Q9D8W5;B1AT36;Q3TRH2	Q9D8W5;B1AT36;Q3TRH2	26S proteasome non-ATPase regulatory subunit 12
Psmd5	21.713	13	0	35.038	27.1748	14	Q8BJY1;F7BA91	Q8BJY1	26S proteasome non-ATPase regulatory subunit 5
Rbmxl1;Rbmx	21.7112	6	0	24.963	26.9068	7	A0A2I3BRL8;Q91VM5;A2AFI4;A2AFI3;Q9WV02;A0A2I3BQC0	A0A2I3BRL8;Q91VM5;A2AFI4;A2AFI3;Q9WV02	RNA binding motif protein, X-linked-like-1;RNA-binding motif protein, X chromosome;RNA-binding motif protein, X chromosome, N-terminally processed
Eif5	21.7104	8	0	25.314	26.7195	9	P59325;Q8BVV6;A0A1Y7VNP4;A0A1Y7VJG2;A0A1Y7VKT5;A0A1Y7VLL6;A0A1Y7VLQ0;A0A1Y7VLK2	P59325;Q8BVV6;A0A1Y7VNP4;A0A1Y7VJG2	Eukaryotic translation initiation factor 5
Cd82	21.7083	3	0	14.642	25.8896	4	P40237;A2AIJ1;A2AIJ2	P40237;A2AIJ1	CD82 antigen;Tetraspanin
Steap3	21.7071	8	0	23.656	26.4381	7	D3YTP0;A0A0R4J1G9;E9QN92;Q8CI59	D3YTP0;A0A0R4J1G9;E9QN92;Q8CI59	Metalloreductase STEAP3
Rangap1	21.7062	12	0	47.454	26.794	12	P46061;A0A2R8VHK9;A0A2R8W753	P46061;A0A2R8VHK9	Ran GTPase-activating protein 1
Cwc15	21.7043	1	0.0030995	1.7041	23.7043	2	A0A1L1SVD8;Q9JHS9	A0A1L1SVD8;Q9JHS9	Spliceosome-associated protein CWC15 homolog
Rab21	21.7039	8	0	20.474	26.6143	7	P35282;A0A1W2P6Z4	P35282	Ras-related protein Rab-21
Rab8b	21.7022	2	0	12.064	25.3567	2	P61028;Q9DD03;Q9CXS2;A0A286YDR2;P63011;P62823	P61028	Ras-related protein Rab-8B
Ndufs2	21.6997	15	0	35.596	27.9759	22	Q91WD5;D3YXT0;A0A0A6YW30;A0A0A6YXD3	Q91WD5;D3YXT0	NADH dehydrogenase [ubiquinone] iron-sulfur protein 2, mitochondrial
Camk2d	21.6977	8	0	74.216	27.0225	10	E9Q1W0;E9Q1T1;A0A0G2JGS4;Q6PHZ2;E9Q1V9;Q8CCM0;F8WIS9;P11798;E9PXV3;F6RWZ9;E9QAJ4;D6RDQ8;F6WHR9;A0A286YDL6	E9Q1W0;E9Q1T1;A0A0G2JGS4;Q6PHZ2;E9Q1V9;Q8CCM0	Calcium/calmodulin-dependent protein kinase type II subunit delta
Pdcd5	21.6963	3	0	8.4157	25.0183	3	P56812;D3Z7Q5	P56812;D3Z7Q5	Programmed cell death protein 5
Mpst	21.694	11	0	32.658	26.5625	12	Q99J99;A0A2R8VHT1;A0A2R8VHE5	Q99J99;A0A2R8VHT1	3-mercaptopyruvate sulfurtransferase
Snrpc	21.6936	2	0	11.674	25.3735	3	Q62241;A0A3B2W450;A0A3B2WCR6	Q62241;A0A3B2W450;A0A3B2WCR6	U1 small nuclear ribonucleoprotein C
Irgm1	21.6889	8	0	25.504	26.3868	10	Q60766	Q60766	Immunity-related GTPase family M protein 1
Wdfy4	21.688	54	0	187.17	29.7903	62	E9Q2M9;E9PV60;F6X8K3;E0CXD5	E9Q2M9;E9PV60
Cpne3	21.6856	8	0	25.658	26.7327	8	Q8BT60;A0A0R4J0J1;Q3UYN2;Q1RLL3;Q9Z140;Q0VE82;Q9DC53;Q8JZW4	Q8BT60	Copine-3
Smap1	21.6835	3	0	7.6335	25.7922	4	Q91VZ6;D3YVX4	Q91VZ6	Stromal membrane-associated protein 1
Mgst3	21.683	5	0	15.639	25.8794	6	Q9CPU4	Q9CPU4	Microsomal glutathione S-transferase 3
Itgb6	21.6823	1	0.00030084	2.4607	26.7698	1	B1AYG7;B1AYG6;Q9Z0T9	B1AYG7;B1AYG6;Q9Z0T9	Integrin beta;Integrin beta-6
Eif3g	21.6816	10	0	40.493	27.5516	13	Q9Z1D1	Q9Z1D1	Eukaryotic translation initiation factor 3 subunit G
Dnm1l	21.6804	28	0	97.512	28.4456	38	E9PUD2;Q8K1M6;A0A2U3TZ67	E9PUD2;Q8K1M6;A0A2U3TZ67	Dynamin-1-like protein
Sash3	21.677	5	0	14.315	25.7033	7	Q8K352	Q8K352	SAM and SH3 domain-containing protein 3
Apex1	21.674	6	0	36.963	26.4775	6	P28352;F6QA74;D3Z124;D3Z6R9	P28352;F6QA74;D3Z124;D3Z6R9	DNA-(apurinic or apyrimidinic site) lyase;DNA-(apurinic or apyrimidinic site) lyase, mitochondrial
Smarcb1	21.6702	1	0	3.0101	23.2552	1	F6U415;Q9Z0H3	F6U415;Q9Z0H3	SWI/SNF-related matrix-associated actin-dependent regulator of chromatin subfamily B member 1
Lmbrd1	21.6669	1	0	10.377	25.2519	1	Q8K0B2	Q8K0B2	Probable lysosomal cobalamin transporter
Copz1	21.666	3	0	13.074	25.4227	3	P61924;A0A2R8VJV3;Q8R3M1	P61924	Coatomer subunit zeta-1
Grhpr	21.6621	6	0	10.91	25.7691	7	Q91Z53;D6REG4;B1AXQ0	Q91Z53;D6REG4	Glyoxylate reductase/hydroxypyruvate reductase
Eif4b	21.6615	9	0	60.53	28.0936	14	Q8BGD9;B2RWE8	Q8BGD9;B2RWE8	Eukaryotic translation initiation factor 4B
Glmp	21.6614	2	0	12.403	24.4688	3	H9H9R4;Q9JHJ3;H3BK59;H3BKY1	H9H9R4;Q9JHJ3;H3BK59;H3BKY1	Glycosylated lysosomal membrane protein
Psat1	21.6614	9	0	31.148	26.3208	10	Q99K85;Q3U6K9;E9Q6P1	Q99K85;Q3U6K9	Phosphoserine aminotransferase
Methig1;mCG_20149;Mettl7a1;UbiE2;Mettl7a2;Mettl7a3	21.6609	2	0	10.941	24.9828	2	H3BJI7;A0A2R8VI07;Q9D7S5;Q8C6B0;Q76I24;Q5I0W6;Q76I26;A0A2R8VHN2;A0A2R8VK72;G3X9G9	H3BJI7;A0A2R8VI07;Q9D7S5;Q8C6B0;Q76I24;Q5I0W6;Q76I26;A0A2R8VHN2;A0A2R8VK72;G3X9G9
Phgdh	21.6604	7	0	24.008	26.2788	7	Q61753;F6ZSB7	Q61753	D-3-phosphoglycerate dehydrogenase
Fam129a	21.6588	22	0	70.333	27.9783	26	Q3UW53;E9PYV4;D3Z233;D3YYZ9	Q3UW53;E9PYV4	Protein Niban
Tuba1c	21.6535	1	0	12.595	26.0458	3	P68373	P68373	Tubulin alpha-1C chain
Zg16	21.6525	2	0.0060807	1.5213	24.4599	3	Q8K0C5;A0A0U1RPF0	Q8K0C5;A0A0U1RPF0	Zymogen granule membrane protein 16
Ufm1	21.6485	2	0	7.3043	24.018	3	P61961	P61961	Ubiquitin-fold modifier 1
Tmcc2	21.6475	7	0	25.842	26.9096	9	Q3T9T1;A0A5F8MQA9;Q3TZY4;Q80W04;A0A0N4SWB9;F8WJ98;Q69ZZ6	Q3T9T1;A0A5F8MQA9;Q3TZY4;Q80W04	Transmembrane and coiled-coil domains protein 2
Aldh16a1	21.6443	10	0	42.347	27.4055	13	D3Z0B9;A0A1B0GSU0;Q571I9;A0A1B0GSN3	D3Z0B9;A0A1B0GSU0;Q571I9	Aldehyde dehydrogenase family 16 member A1
Ddx21	21.6428	27	0	108.53	28.6352	31	Q9JIK5	Q9JIK5	Nucleolar RNA helicase 2
Mybbp1a	21.6383	29	0	145.87	28.3412	34	Q7TPV4	Q7TPV4	Myb-binding protein 1A
Lrpprc	21.6351	42	0	116.78	28.7547	45	Q6PB66;F6V2A3	Q6PB66	Leucine-rich PPR motif-containing protein, mitochondrial
Myct1	21.6336	2	0	4.0072	24.2186	1	Q8R411	Q8R411	Myc target protein 1
	21.6318	2	0	6.9711	24.4392	1	P01635;A0A140T8P6	P01635;A0A140T8P6	Ig kappa chain V-V region K2
Snrpn;Snrpb	21.6309	5	0	9.6058	26.507	5	P63163;P27048;A0A0G2JGN4	P63163;P27048	Small nuclear ribonucleoprotein-associated protein N;Small nuclear ribonucleoprotein-associated protein B
Wipf1	21.6303	8	0	14.318	27.5596	10	Q8K1I7;F6RQI2;F6QWW7	Q8K1I7	WAS/WASL-interacting protein family member 1
Ptrf	21.6295	6	0	35.849	26.9981	8	O54724	O54724	Polymerase I and transcript release factor
Gp6	21.6236	4	0	10.884	25.6354	4	A0A140T8Q7;P0C191	A0A140T8Q7;P0C191	Platelet glycoprotein VI
Ist1	21.6236	5	0	11.725	25.7661	6	Q9CX00	Q9CX00	IST1 homolog
Ptgr2	21.6227	5	0	16.208	25.5358	8	Q8VDQ1;Q3TXN1;D6RGL6	Q8VDQ1;Q3TXN1	Prostaglandin reductase 2
Eprs	21.6222	43	0	174.87	29.5686	49	Q8CGC7;A0A0A6YWA4;A0A0A6YWH3	Q8CGC7	Bifunctional glutamate/proline--tRNA ligase;Glutamate--tRNA ligase;Proline--tRNA ligase
Nipsnap3b	21.6189	4	0	12.884	26.131	5	Q9CQE1;B1AWZ5	Q9CQE1;B1AWZ5	Protein NipSnap homolog 3B
Sh3bp1	21.6185	20	0	89.694	27.9248	29	P55194;A2A5V3;A2A5V2;S4R2D3;A0A2R8W6I7;S4R2T6	P55194;A2A5V3;A2A5V2;S4R2D3;A0A2R8W6I7	SH3 domain-binding protein 1
Ipo9	21.616	2	0	9.6165	23.8634	3	E0CY46;E0CXB2;E9QKZ2;Q91YE6;F6UT58	E0CY46;E0CXB2;E9QKZ2;Q91YE6;F6UT58	Importin-9
Hccs	21.6125	2	0	4.8742	24.3015	2	G3UXK7;P53702	G3UXK7;P53702	Cytochrome c-type heme lyase
Rcc1	21.6124	11	0	26.669	26.8826	10	Q8VE37;Q6PFB2;A2CER2	Q8VE37;Q6PFB2	Regulator of chromosome condensation
Coa3	21.6099	3	0	7.2781	24.1949	3	Q9D2R6;E9Q6W2	Q9D2R6;E9Q6W2	Cytochrome c oxidase assembly factor 3 homolog, mitochondrial
Dnase2;Dnase2a	21.6086	3	0	6.0448	25.416	3	P56542;D3Z512;D3Z5U3	P56542;D3Z512	Deoxyribonuclease-2-alpha
Clint1	21.6054	13	0	36.255	27.817	14	Q5SUH7;Q5SUH6;Q99KN9	Q5SUH7;Q5SUH6;Q99KN9	Clathrin interactor 1
Eif2s2	21.6054	13	0	58.936	27.6079	14	Q99L45;E0CXJ3	Q99L45	Eukaryotic translation initiation factor 2 subunit 2
Bcap29	21.6033	2	0	15.765	25.4125	3	Q61334	Q61334	B-cell receptor-associated protein 29
Gnaz	21.6019	8	0	29.083	26.1964	8	O70443	O70443	Guanine nucleotide-binding protein G(z) subunit alpha
Psmd6	21.5991	13	0	37.496	27.4731	18	Q99JI4;A0A286YDW8	Q99JI4	26S proteasome non-ATPase regulatory subunit 6
Lsm6	21.5965	2	0	3.0883	23.9183	2	P62313	P62313	U6 snRNA-associated Sm-like protein LSm6
Sdcbp	21.5943	5	0	26.71	26.3155	8	Q3TMX0;O08992;H3BLG5;A2AKJ9;A2AKJ6;A2AKJ5	Q3TMX0;O08992;H3BLG5;A2AKJ9;A2AKJ6	Syntenin-1
Clta	21.5898	3	0	14.493	24.6747	4	B1AWE0;Q6PFA2;B1AWE1;B1AWD8;B1AWD9;O08585	B1AWE0;Q6PFA2;B1AWE1;B1AWD8;B1AWD9;O08585	Clathrin light chain A
Ybx3	21.5877	4	0	87.281	27.0346	4	Q9JKB3	Q9JKB3	Y-box-binding protein 3
Banf1	21.5859	3	0	7.8758	24.7325	3	O54962	O54962	Barrier-to-autointegration factor;Barrier-to-autointegration factor, N-terminally processed
Dnajb1	21.5851	6	0	11.92	25.5883	5	Q3TYL7;Q9QYJ3	Q3TYL7;Q9QYJ3	DnaJ homolog subfamily B member 1
	21.5837	2	0	10.727	23.9056	2	A0A0G2JE99;P01843	A0A0G2JE99;P01843	Ig lambda-1 chain C region
Nol7	21.5819	1	0	3.2215	23.1669	1	A0A1Y7VMS4;Q9D7Z3	A0A1Y7VMS4;Q9D7Z3	Nucleolar protein 7
Npepps	21.5816	22	0	91.339	28.1436	23	Q11011;E9Q039;F6QYF8;E9Q6F4;F6V7K3;F2Z3V5;F7ANF4	Q11011;E9Q039;F6QYF8;E9Q6F4	Puromycin-sensitive aminopeptidase
Arrb1	21.5816	13	0	41.823	28.5614	18	Q8BWG8;J3QNU6;E0CY53;F7DF62;E0CYB1;J3QNF6;P20443	Q8BWG8;J3QNU6	Beta-arrestin-1
Romo1	21.581	1	0	4.0891	23.581	1	P60603	P60603	Reactive oxygen species modulator 1
Rab4b	21.5751	5	0	10.419	25.3824	5	Q91ZR1;P56371	Q91ZR1	Ras-related protein Rab-4B
Ppm1b	21.5738	7	0	26.402	26.6816	11	P36993;Q99NF7;A0A1Y7VJZ4	P36993;Q99NF7	Protein phosphatase 1B
Asna1	21.5709	8	0	21.529	26.458	9	O54984;A0A1B0GRE1	O54984	ATPase Asna1
Txnrd1	21.5696	10	0	32.298	27.0767	12	Q9JMH6;A0A1W2P6U1;Q9D8I4;A0A0U1RPS1	Q9JMH6	Thioredoxin reductase 1, cytoplasmic
Rbm38	21.5664	1	0	3.6906	23.1514	1	G3UWX7;Q62176	G3UWX7;Q62176	RNA-binding protein 38
Cox5b	21.5663	4	0	11.153	27.3106	5	Q9D881;P19536	Q9D881;P19536	Cytochrome c oxidase subunit 5B, mitochondrial
Hemgn	21.5663	9	0	43.477	28.4706	16	Q9ERZ0	Q9ERZ0	Hemogen
Abce1	21.565	16	0	82.456	27.5991	18	P61222	P61222	ATP-binding cassette sub-family E member 1
Crnkl1	21.5577	2	0	3.3541	26.9152	1	P63154	P63154	Crooked neck-like protein 1
Isg20	21.5573	5	0	13.788	25.9727	7	A0A0U1RP59;Q9JL16	A0A0U1RP59;Q9JL16	Interferon-stimulated gene 20 kDa protein
Eif6	21.5512	6	0	62.985	27.1154	8	O55135;A6PWZ2;D6RG53;D6RJJ3;B1AZQ4	O55135	Eukaryotic translation initiation factor 6
Pygl	21.5477	25	0	80.628	28.044	31	Q9ET01;Q3UEJ6	Q9ET01;Q3UEJ6	Glycogen phosphorylase, liver form;Alpha-1,4 glucan phosphorylase
Tuba8	21.5431	4	0	11.242	26.2753	6	Q9JJZ2	Q9JJZ2	Tubulin alpha-8 chain
Mogs	21.5425	18	0	66.146	27.9472	19	Q80UM7	Q80UM7	Mannosyl-oligosaccharide glucosidase
Blmh	21.5421	13	0	62.236	27.6997	15	Q8R016;E9PY26;E9PZH4;E9Q6V3;E9QA53	Q8R016;E9PY26	Bleomycin hydrolase
Fkbp4	21.5416	14	0	68.497	27.7375	17	P30416;F7CAT1;F6S2D5	P30416	Peptidyl-prolyl cis-trans isomerase FKBP4;Peptidyl-prolyl cis-trans isomerase FKBP4, N-terminally processed
Elovl1	21.5378	1	0	8.6294	24.3451	2	Q9JLJ5	Q9JLJ5	Elongation of very long chain fatty acids protein 1
Hp	21.5367	6	0	10.02	25.9463	7	Q61646	Q61646	Haptoglobin;Haptoglobin alpha chain;Haptoglobin beta chain
Akr1b10	21.535	9	0	16.419	27.102	8	G5E895;D3Z494;S4R2G9	G5E895;D3Z494;S4R2G9
Nampt	21.5343	13	0	28.603	27.0689	15	Q99KQ4	Q99KQ4	Nicotinamide phosphoribosyltransferase
Ube2g2	21.5339	2	0	5.5004	24.2207	2	G3UZX2;P60605	G3UZX2;P60605	Ubiquitin-conjugating enzyme E2 G2
Dnaja2	21.5312	7	0	32.23	26.6975	10	Q9QYJ0	Q9QYJ0	DnaJ homolog subfamily A member 2
Mapkapk2	21.5291	7	0	18.078	26.56	7	P49138;A0A087WSN7;B1AVU1;Q9D2E1;Q922R0	P49138;A0A087WSN7	MAP kinase-activated protein kinase 2
Ndufa1	21.5281	1	0	2.7905	22.5281	1	O35683	O35683	NADH dehydrogenase [ubiquinone] 1 alpha subcomplex subunit 1
Dpp3	21.524	22	0	125.11	28.0529	29	Q99KK7;A0A494BBC1;A0A494BA16;A0A494BBB3;A0A494B918	Q99KK7;A0A494BBC1	Dipeptidyl peptidase 3
Atp6v1d	21.5228	6	0	22.341	26.4153	7	P57746	P57746	V-type proton ATPase subunit D
Emilin1	21.5221	17	0	82.389	28.1271	19	Q99K41	Q99K41	EMILIN-1
Vamp8	21.517	4	0	18.339	27.7676	10	O70404;A0A0R4J0R1;A0A0U1RPE8	O70404;A0A0R4J0R1;A0A0U1RPE8	Vesicle-associated membrane protein 8
Stx4	21.5143	6	0	35.81	27.1768	6	P70452;D6RJ29	P70452	Syntaxin-4
Ndufs6	21.5068	2	0	5.5327	24.8031	2	P52503;A0A1Y7VM38	P52503;A0A1Y7VM38	NADH dehydrogenase [ubiquinone] iron-sulfur protein 6, mitochondrial
Lonp1	21.5067	21	0	83.546	28.2233	22	Q8CGK3	Q8CGK3	Lon protease homolog, mitochondrial
Mars	21.5027	17	0	42.251	27.6905	19	Q68FL6;E9QB02;F6W0G8	Q68FL6;E9QB02	Methionine--tRNA ligase, cytoplasmic
Sar1a	21.5011	3	0	24.463	25.9205	6	Q99JZ4;A0A1W2P869;A0A1W2P6N3;P36536	Q99JZ4;A0A1W2P869;A0A1W2P6N3;P36536	GTP-binding protein SAR1a
Ddx17	21.5002	13	0	40.347	27.3552	15	Q501J6;Q3U741;Q3TU25	Q501J6;Q3U741;Q3TU25	Probable ATP-dependent RNA helicase DDX17
Bri3bp	21.4991	2	0	17.468	24.4991	2	Q8BXV2;A0A0G2JGE0	Q8BXV2;A0A0G2JGE0	BRI3-binding protein
Acss1	21.4918	13	0	40.443	27.5052	13	Q99NB1	Q99NB1	Acetyl-coenzyme A synthetase 2-like, mitochondrial
Yars	21.4904	15	0	43.959	27.0639	15	Q91WQ3;A2A7S7;F6VXZ2	Q91WQ3;A2A7S7	Tyrosine--tRNA ligase, cytoplasmic;Tyrosine--tRNA ligase, cytoplasmic, N-terminally processed;Tyrosine--tRNA ligase
Plgrkt	21.4894	2	0	9.9262	25.3689	3	Q9D3P8	Q9D3P8	Plasminogen receptor (KT)
Stxbp2	21.4841	19	0	97.731	28.2893	23	Q64324;F8WGM5;A0A140LJH9;A0A140LJ60;A0A140LHM1	Q64324;F8WGM5	Syntaxin-binding protein 2
Fam63a	21.4836	6	0	44.742	26.9417	6	Q76LS9;A0A0G2JDK1	Q76LS9	Protein FAM63A
Ube2v2;Ube2v1	21.4797	1	0	4.1832	24.8016	1	Q9D2M8;A6X925;B7ZBY6;B2KF55	Q9D2M8;A6X925;B7ZBY6	Ubiquitin-conjugating enzyme E2 variant 2
Spcs2	21.478	6	0	21.488	26.1142	8	Q9CYN2;A0A140LJG6;A0A140LHR3;A0A140LJ01;A0A140LHG8;A0A140LIK0;A0A140LHW5	Q9CYN2;A0A140LJG6;A0A140LHR3;A0A140LJ01;A0A140LHG8;A0A140LIK0	Signal peptidase complex subunit 2
Igj	21.4752	3	0	5.3827	24.9105	2	P01592	P01592	Immunoglobulin J chain
H2-DMb2	21.4746	4	0	19.043	25.9152	4	Q31099	Q31099
Mina	21.4741	1	0	3.9038	22.4741	1	D3Z287;Q8CCK9;D3YTU3;Q8CD15	D3Z287;Q8CCK9;D3YTU3;Q8CD15	Bifunctional lysine-specific demethylase and histidyl-hydroxylase MINA
Arcn1	21.4741	14	0	29.577	26.8304	14	Q5XJY5	Q5XJY5	Coatomer subunit delta
Pdcd6	21.47	6	0	18.899	26.1422	8	P12815	P12815	Programmed cell death protein 6
Abi1	21.4674	9	0	29.181	26.5346	9	Q8CBW3;B7ZCU2;J3QNK8;B7ZCU0;B7ZCU3;B7ZCU5;B7ZCU4;A0A087WNT3;A0A087WRS3;A0A087WPP8;Q6AXH6;Q6AXD2;P62484;A0A087WNU9;A0A087WP64;A0A087WPE6;A0A087WR90	Q8CBW3;B7ZCU2;J3QNK8;B7ZCU0;B7ZCU3;B7ZCU5;B7ZCU4	Abl interactor 1
Syngr2;Gm20708	21.4656	1	0.00029621	2.2829	23.0505	1	H3BJY1;H3BJ78;H3BKF4;H3BIZ8;B0QZP8;O55101	H3BJY1;H3BJ78;H3BKF4;H3BIZ8;B0QZP8;O55101	Synaptogyrin-2
Emc8	21.4647	6	0	17.399	25.8319	6	O70378;M0QWP2;M0QWY0;M0QWS0;M0QWI7;M0QWE2;M0QWC9	O70378;M0QWP2;M0QWY0	ER membrane protein complex subunit 8
Mcu	21.4613	8	0	60.531	27.0863	9	Q3UMR5	Q3UMR5	Calcium uniporter protein, mitochondrial
Aprt	21.4611	6	0	21.759	25.9165	8	P08030;A0A1D5RLR6	P08030	Adenine phosphoribosyltransferase
Eno3	21.4519	9	0	47.157	27.1644	14	P21550;Q5SX59;J3QPZ9;Q5SX60;Q5SX61	P21550;Q5SX59	Beta-enolase;Enolase
Adprh	21.4518	10	0	23.493	26.5518	11	P54923	P54923	[Protein ADP-ribosylarginine] hydrolase
Mavs	21.4501	7	0	18.74	26.5508	8	Q8VCF0	Q8VCF0	Mitochondrial antiviral-signaling protein
Lat	21.4491	2	0.0092719	1.376	24.4492	2	A0A0U1RP03;O54957	A0A0U1RP03;O54957	Linker for activation of T-cells family member 1
	21.4486	2	0.0017236	1.9073	24.6161	1	Q3U7U4	Q3U7U4	Transmembrane protein C1orf162 homolog
Lypla2	21.4455	4	0	18.722	26.4261	6	Q9WTL7	Q9WTL7	Acyl-protein thioesterase 2
Asl	21.4428	8	0	23.353	26.3487	11	Q91YI0;E0CY49;E0CYV3;F7D439	Q91YI0;E0CY49	Argininosuccinate lyase
Rdh11	21.4378	4	0	6.2369	25.2452	3	Q9R1R8;Q9QYF1	Q9R1R8;Q9QYF1	Retinol dehydrogenase 11
Cd36	21.4365	7	0	17.377	26.4676	8	Q08857;A0A0G2JFB7	Q08857	Platelet glycoprotein 4
Timm44	21.4364	11	0	44.098	27.117	11	O35857	O35857	Mitochondrial import inner membrane translocase subunit TIM44
Gp5	21.4329	11	0	56.438	27.3091	15	Q9QZU3;O08742	Q9QZU3;O08742	Platelet glycoprotein V
Tmed2	21.4301	2	0	12.432	25.6588	4	F6V6T4;Q9R0Q3	F6V6T4;Q9R0Q3	Transmembrane emp24 domain-containing protein 2
Metap2	21.4283	14	0	70.355	27.8092	20	Q3UI33;O08663;Q3TMN1;M0QWM9;M0QW69;M0QW48;M0QWX0	Q3UI33;O08663;Q3TMN1	Methionine aminopeptidase 2
Hck	21.4241	9	0	30.119	27.0296	12	F6UND7;P08103	F6UND7;P08103	Non-specific protein-tyrosine kinase;Tyrosine-protein kinase HCK
Rbm25	21.4231	2	0	6.7385	25.8825	2	S4R2B0;B2RY56	S4R2B0;B2RY56	RNA-binding protein 25
Cnpy3	21.4224	3	0	10.364	26.3387	3	Q9DAU1	Q9DAU1	Protein canopy homolog 3
Ndufa11	21.421	4	0	15.353	26.0477	5	G5E814;Q9D8B4;A0A3B2W4A5;A0A3B2W441	G5E814;Q9D8B4;A0A3B2W4A5;A0A3B2W441	NADH dehydrogenase [ubiquinone] 1 alpha subcomplex subunit 11
Tsta3	21.4209	5	0	32.158	25.9634	6	A0A2R8W6P6;A0A2R8VI39;P23591;A0A2R8VKL9;A0A2R8VHD0;A0A2R8W6N0	A0A2R8W6P6;A0A2R8VI39;P23591;A0A2R8VKL9;A0A2R8VHD0	GDP-L-fucose synthase
Trim28	21.4154	15	0	49.161	27.7919	19	Q62318	Q62318	Transcription intermediary factor 1-beta
Atl3	21.4129	12	0	79.228	27.8716	19	E9PYT3;Q91YH5;A0A494BAU1;A0A494BAX8;A0A494BAW9;A0A494B9P1	E9PYT3;Q91YH5	Atlastin-3
Pros1	21.4075	11	0	44.179	27.6476	13	Q08761;CON__P07224	Q08761	Vitamin K-dependent protein S
Vimp	21.406	1	0	3.4462	23.406	1	A0A0U1RPI8;A0A0U1RP62;Q9BCZ4	A0A0U1RPI8;A0A0U1RP62;Q9BCZ4	Selenoprotein S
Ppp1cc	21.4032	4	0	36.174	26.161	5	P63087;A0A0G2JGC1;A0A0G2JFF1	P63087;A0A0G2JGC1;A0A0G2JFF1	Serine/threonine-protein phosphatase PP1-gamma catalytic subunit
Pfkl	21.4019	17	0	70.616	27.6622	19	P12382;A0A1W2P7T1	P12382	ATP-dependent 6-phosphofructokinase, liver type
Cops8	21.3992	5	0	16.228	25.7287	6	Q8VBV7;A0A087WPM5	Q8VBV7	COP9 signalosome complex subunit 8
Nhp2	21.3984	3	0	9.0682	24.3031	4	Q9CRB2	Q9CRB2	H/ACA ribonucleoprotein complex subunit 2
Nudt16	21.3982	3	0	6.8049	23.72	3	A0A087WSB5;A0A087WRE5;Q6P3D0	A0A087WSB5;A0A087WRE5;Q6P3D0	U8 snoRNA-decapping enzyme
Zadh2	21.3936	7	0	10.994	26.405	6	Q8BGC4;A0A494BB38	Q8BGC4;A0A494BB38	Zinc-binding alcohol dehydrogenase domain-containing protein 2
Psmd10	21.3922	1	0	4.2535	23.9772	1	A2AG83;Q9Z2X2	A2AG83;Q9Z2X2	26S proteasome non-ATPase regulatory subunit 10
Gmppb	21.3912	10	0	35.215	26.3254	10	Q8BTZ7	Q8BTZ7	Mannose-1-phosphate guanyltransferase beta
Unc13d	21.3877	33	0	144.73	28.2901	43	B2RUP2;A0A0R4J257;A2A855;A2A858	B2RUP2;A0A0R4J257	Protein unc-13 homolog D
Pfdn5	21.3858	4	0	17.496	24.9015	7	Q9WU28;H7BWX1;E9PZ62;E9PVG3	Q9WU28;H7BWX1;E9PZ62	Prefoldin subunit 5
Clu	21.3852	10	0	24.525	26.6767	10	Q06890;E9PUU2;E9PXG5;E9Q8Y5;E9Q9B8;E9Q2G2	Q06890;E9PUU2;E9PXG5;E9Q8Y5;E9Q9B8	Clusterin;Clusterin beta chain;Clusterin alpha chain
Pla2g15	21.3828	7	0	26.062	26.6188	9	Q8VEB4;A0A1D5RLZ5	Q8VEB4	Group XV phospholipase A2
Psme3	21.3781	4	0	13.146	25.0786	5	P61290;A2A4J1;A2A4J3	P61290;A2A4J1;A2A4J3	Proteasome activator complex subunit 3
Ech1	21.3781	4	0	29.31	26.2286	5	O35459;F7B227	O35459;F7B227	Delta(3,5)-Delta(2,4)-dienoyl-CoA isomerase, mitochondrial
Got1	21.3757	11	0	35.612	26.4959	12	P05201;F7ALS6	P05201	Aspartate aminotransferase, cytoplasmic
Emc2	21.3735	3	0	10.466	25.1809	3	Q9CRD2	Q9CRD2	ER membrane protein complex subunit 2
Prpf19	21.3704	10	0	37.972	27.6078	13	Q99KP6	Q99KP6	Pre-mRNA-processing factor 19
Nudc	21.3698	4	0	22.953	26.1464	4	O35685	O35685	Nuclear migration protein nudC
Tmem175	21.3691	1	0	4.4331	24.1765	1	Q8BHJ8;Q9CXY1	Q8BHJ8;Q9CXY1	Transmembrane protein 175
Itga2	21.3684	21	0	105.23	28.4594	26	Q62469;A0A286YCM1	Q62469	Integrin alpha-2
Mrpl54	21.3666	2	0	4.6625	24.1739	2	Q9CPW3	Q9CPW3	39S ribosomal protein L54, mitochondrial
Rars	21.3666	17	0	37.939	27.4852	19	Q9D0I9	Q9D0I9	Arginine--tRNA ligase, cytoplasmic
Mcm3	21.3652	20	0	95.833	27.6995	22	P25206	P25206	DNA replication licensing factor MCM3
Adsl	21.3629	16	0	50.939	27.6691	18	P54822;E9Q3T7;E9Q242;E9Q0A0;A0A140LHU1;A0A0G2JFI8	P54822;E9Q3T7;E9Q242	Adenylosuccinate lyase
Elmo1	21.3616	14	0	36.214	28.266	16	Q8BPU7;A0A1Y7VIX9	Q8BPU7	Engulfment and cell motility protein 1
Ufd1l	21.3602	7	0	13.695	25.6466	8	P70362;F6SYJ2;E9Q475;E9Q646;E9Q0Y6	P70362	Ubiquitin fusion degradation protein 1 homolog
Aars	21.3597	21	0	83.177	28.0202	23	Q8BGQ7	Q8BGQ7	Alanine--tRNA ligase, cytoplasmic
Vti1b	21.3589	5	0	11.844	25.9075	7	Q91XH6;O88384;F6UHS3;E0CYE5;F6T4B9	Q91XH6;O88384;F6UHS3	Vesicle transport through interaction with t-SNAREs homolog 1B
Aco1	21.3585	22	0	73.248	27.8674	28	P28271;Q811J3	P28271	Cytoplasmic aconitate hydratase
Slc25a24	21.3578	8	0	28.676	26.3713	8	Q8BMD8;A0A0G2JFB9	Q8BMD8	Calcium-binding mitochondrial carrier protein SCaMC-1
Clpp	21.3569	5	0	15.723	26.0638	4	O88696	O88696	ATP-dependent Clp protease proteolytic subunit, mitochondrial
Pfdn6	21.3556	4	0	4.9118	25.0938	4	Q03958;G3UYF9;A0A3Q4EBT3	Q03958;G3UYF9;A0A3Q4EBT3	Prefoldin subunit 6
Rgs10	21.355	4	0	15.741	25.3116	5	Q9CQE5;D3Z1B6;A0A0U1RPU5	Q9CQE5;D3Z1B6;A0A0U1RPU5	Regulator of G-protein signaling 10
Ahsa1	21.3525	8	0	33.729	27.1365	8	Q8BK64;A0A1Y7VM19	Q8BK64	Activator of 90 kDa heat shock protein ATPase homolog 1
Dpp7	21.3514	6	0	33.059	25.5768	6	Q9ET22	Q9ET22	Dipeptidyl peptidase 2
Stx12	21.3486	6	0	43.422	26.6342	8	Q9ER00	Q9ER00	Syntaxin-12
Vamp5	21.348	2	0	8.0415	23.3346	3	Q9Z2P8;A0A0U1RP87	Q9Z2P8;A0A0U1RP87	Vesicle-associated membrane protein 5
Preb	21.343	8	0	16.616	26.0015	9	D3Z3S1;Q9WUQ2;A0A0J9YU39;F6XLZ3	D3Z3S1;Q9WUQ2;A0A0J9YU39	Prolactin regulatory element-binding protein
Acot7	21.3397	5	0	15.822	27.1309	7	E9PYH2;Q91V12	E9PYH2;Q91V12	Cytosolic acyl coenzyme A thioester hydrolase
Vat1	21.3395	10	0	26.145	26.4016	10	Q62465	Q62465	Synaptic vesicle membrane protein VAT-1 homolog
Vav1	21.3388	22	0	84.937	27.9893	28	P27870;Q8VDU4;E9PXI0	P27870;Q8VDU4;E9PXI0	Proto-oncogene vav
Kif5b	21.3378	22	0	96.379	27.9524	26	Q61768;E9QAK5;P33175;A2ARD4	Q61768;E9QAK5	Kinesin-1 heavy chain;Kinesin-like protein
Cmtm6	21.3365	1	0.00030553	2.6217	22.9214	1	Q9CZ69	Q9CZ69	CKLF-like MARVEL transmembrane domain-containing protein 6
Tfg	21.3357	4	0	13.562	26.3178	4	Q9Z1A1;B8JJG7;B8JJG8;B8JJG9;F6QJV5	Q9Z1A1;B8JJG7;B8JJG8;B8JJG9
Tst	21.3354	5	0	9.3802	26.5946	5	P52196	P52196	Thiosulfate sulfurtransferase
Igkv1-133;Igkv1-135	21.3336	1	0.00030221	2.5	23.9185	1	A0A0B4J1H8;A0A0B4J1H7	A0A0B4J1H8;A0A0B4J1H7
Gls	21.3273	1	0	18.092	24.3389	2	F6RDM4	F6RDM4
Rfk	21.326	2	0	8.3686	24.1334	2	Q8CFV9	Q8CFV9	Riboflavin kinase
Use1	21.322	2	0	4.2187	23.6439	1	D3Z6D3;Q9CQ56;E9Q496	D3Z6D3;Q9CQ56;E9Q496	Vesicle transport protein USE1
Tspan14	21.3107	4	0	10.807	25.4192	4	Q8QZY6	Q8QZY6	Tetraspanin-14
Lrrc28	21.3067	1	0.0033604	1.6685	23.6287	1	A0A087WQI4;A0A087WP31;Q8C1S3;Q9D7Y1;A0A087WSB2;Q3TX51	A0A087WQI4;A0A087WP31;Q8C1S3;Q9D7Y1;A0A087WSB2;Q3TX51	Leucine-rich repeat-containing protein 28
Tmem40	21.3049	2	0	2.7266	24.1197	2	E9Q6I9;Q4FJU9;E9QN39	E9Q6I9;Q4FJU9;E9QN39	Transmembrane protein 40
Spn	21.3046	1	0	12.435	24.4746	1	A0A0U1RNN5;P15702	A0A0U1RNN5;P15702	Leukosialin
Dcun1d1	21.3042	3	0	10.44	25.0847	4	A0A140T8R8;A0A0G2JGV7;Q3UT23;A0A1Y7VP24;Q9QZ73;A0A0G2JEA2;A0A0G2JDN9;A0A1B0GXL7;A0A0G2JDM0	A0A140T8R8;A0A0G2JGV7;Q3UT23;A0A1Y7VP24;Q9QZ73;A0A0G2JEA2;A0A0G2JDN9;A0A1B0GXL7;A0A0G2JDM0	DCN1-like protein;DCN1-like protein 1
Rrm1	21.304	16	0	60.384	27.3787	19	P07742;A0A1B0GSB1	P07742	Ribonucleoside-diphosphate reductase large subunit
Slc30a1	21.3024	1	0.0047407	1.6091	25.6947	1	Q60738	Q60738	Zinc transporter 1
Uggt1	21.3021	30	0	173.6	28.8252	38	Q6P5E4;G3UYG7;G3UY73;G3UZU8;G3UY35	Q6P5E4	UDP-glucose:glycoprotein glucosyltransferase 1
Rab5a	21.3018	3	0	6.423	24.7613	3	Q9CQD1	Q9CQD1	Ras-related protein Rab-5A
Cds2	21.3015	5	0	21.241	26.0463	6	Q99L43;A2AMQ5;F6S4G2;Q6PBC0	Q99L43;A2AMQ5;F6S4G2	Phosphatidate cytidylyltransferase 2;Phosphatidate cytidylyltransferase
Psmd1	21.3009	21	0	62.16	28.6491	29	Q3TXS7;J3QN38;D6RGR5	Q3TXS7	26S proteasome non-ATPase regulatory subunit 1
Stx11	21.2977	5	0	28.667	26.0119	5	Q3U5V8;A0A1W2P6Y3;A0A1W2P6E3;Q9D3G5	Q3U5V8;A0A1W2P6Y3;A0A1W2P6E3;Q9D3G5	Syntaxin-11
Selm	21.2976	1	0.00030637	2.661	24.4676	0	Q8VHC3	Q8VHC3	Selenoprotein M
Aldh6a1	21.2886	12	0	48.08	27.5241	17	Q9EQ20;A0A1Y7VJ32	Q9EQ20	Methylmalonate-semialdehyde dehydrogenase [acylating], mitochondrial
Fmnl1	21.2848	22	0	67.449	28.2171	28	A0A1W2P6X3;Q9JL26;A2AB60;G3UWI1	A0A1W2P6X3;Q9JL26;A2AB60	Formin-like protein 1
Gng10;Gm20503	21.2847	2	0	3.6994	23.2848	2	Q9CXP8;G3UZK1	Q9CXP8;G3UZK1	Guanine nucleotide-binding protein G(I)/G(S)/G(O) subunit gamma-10;Guanine nucleotide-binding protein subunit gamma
Mcm5	21.2827	14	0	43.613	27.6669	14	P49718	P49718	DNA replication licensing factor MCM5
Dhx9	21.2818	20	0	73.716	28.1027	19	A0A087WPL5;E9QNN1;O70133;Q3UR42;A0A0R4J2C3	A0A087WPL5;E9QNN1;O70133;Q3UR42	ATP-dependent RNA helicase A
Mrpl41	21.2771	3	0	8.432	24.2771	3	Q9CQN7	Q9CQN7	39S ribosomal protein L41, mitochondrial
Ube2l3	21.2762	7	0	57.243	28.7632	15	A0A338P786;P68037;A0A338P7E5;A0A338P702	A0A338P786;P68037;A0A338P7E5;A0A338P702	Ubiquitin-conjugating enzyme E2 L3
Nlrx1	21.2637	19	0	51.462	27.74	25	Q3TL44;A0A1L1ST78;A0A1L1SQN7	Q3TL44	NLR family member X1
Tmem256	21.2608	2	0	8.963	24.7019	2	Q5F285	Q5F285	Transmembrane protein 256
Add3	21.2607	13	0	30.795	27.0034	15	Q9QYB5;A0A494B9K4;A0A494BAX9;A0A494BBK1;A0A494B969	Q9QYB5;A0A494B9K4	Gamma-adducin
Fundc2	21.26	5	0	21.406	25.6645	6	Q9D6K8;Q9D9Q3	Q9D6K8	FUN14 domain-containing protein 2
Mtco1	21.2595	1	0	8.036	23.5814	2	P00397	P00397	Cytochrome c oxidase subunit 1
Fkbp11	21.2581	4	0	16.179	25.3254	5	Q9D1M7	Q9D1M7	Peptidyl-prolyl cis-trans isomerase FKBP11
Derl1	21.2544	3	0	8.285	24.7138	3	Q99J56	Q99J56	Derlin-1
Pccb	21.2525	9	0	56.108	26.4358	11	Q99MN9;E9Q1J7;D3YZC1;A0A087WQV1	Q99MN9;E9Q1J7;D3YZC1	Propionyl-CoA carboxylase beta chain, mitochondrial
Slc25a21	21.2488	4	0	6.577	25.3363	4	B6CI26;Q8BZ09	B6CI26;Q8BZ09	Mitochondrial 2-oxodicarboxylate carrier
F11r	21.2475	2	0	8.3557	25.2391	3	O88792	O88792	Junctional adhesion molecule A
Tomm22	21.2469	4	0	16.596	24.2912	6	Q9CPQ3;A0A2R8VHM4;A0A2R8VHJ4	Q9CPQ3;A0A2R8VHM4	Mitochondrial import receptor subunit TOM22 homolog
Mpeg1	21.2435	12	0	29.74	26.9684	14	E9QN37;A1L314	E9QN37;A1L314	Macrophage-expressed gene 1 protein
Agtrap	21.2412	1	0	2.9439	23.2412	1	Q9WVK0	Q9WVK0	Type-1 angiotensin II receptor-associated protein
Pecr	21.2359	2	0	5.5447	23.8208	2	D6RHN4;Q3UXD9;Q99MZ7;D6RIP0	D6RHN4;Q3UXD9;Q99MZ7;D6RIP0	Peroxisomal trans-2-enoyl-CoA reductase
Pgp	21.2347	5	0	16.211	25.972	5	Q8CHP8	Q8CHP8	Phosphoglycolate phosphatase
Bub3	21.2342	5	0	17.044	25.7093	5	A0A140LHA2;Q9WVA3;A0A140LJ21;A0A140LIM5;A0A140LI47	A0A140LHA2;Q9WVA3;A0A140LJ21	Mitotic checkpoint protein BUB3
Timm17b	21.2319	2	0	12.056	24.4018	2	Q9Z0V7	Q9Z0V7	Mitochondrial import inner membrane translocase subunit Tim17-B
Ttll12	21.2265	12	0	37.144	27.3587	13	Q3UDE2;F2Z423	Q3UDE2	Tubulin--tyrosine ligase-like protein 12
Prkcd	21.2255	12	0	25.953	27.1741	14	P28867;Q1MX41;Q1MX43;Q1MX40;Q1MX42;REV__E9Q9T6;REV__Q6ZPL9	P28867;Q1MX41;Q1MX43;Q1MX40;Q1MX42	Protein kinase C delta type;Protein kinase C delta type regulatory subunit;Protein kinase C delta type catalytic subunit;Protein kinase C
Pcca	21.2242	16	0	44.609	27.505	16	Q91ZA3;H3BL62;D3YZC0;H3BK61	Q91ZA3	Propionyl-CoA carboxylase alpha chain, mitochondrial
Sec62	21.2229	3	0	14.639	25.6442	3	Q8BU14	Q8BU14	Translocation protein SEC62
Dnajc5	21.219	2	0	5.8332	23.9916	2	A2AUE1;G5E8T0;P60904	A2AUE1;G5E8T0;P60904	DnaJ homolog subfamily C member 5
Psmd14	21.218	4	0	13.477	26.3714	7	O35593	O35593	26S proteasome non-ATPase regulatory subunit 14
Tra2b	21.2175	3	0	8.9059	24.5784	4	F8WJG3;P62996	F8WJG3;P62996	Transformer-2 protein homolog beta
Serpina1d	21.2174	6	0	33.645	25.6719	5	Q00897	Q00897	Alpha-1-antitrypsin 1-4
Psmd3	21.2172	12	0	35.918	28.07	12	P14685;F7B7L8	P14685	26S proteasome non-ATPase regulatory subunit 3
Gnai3	21.2169	7	0	37.705	26.4375	9	Q9DC51;A2AE32;P20612;P18872;Q3V3I2;P50149;A2A610;A2AE31;Q8C040;D3Z2M7;Q8BHK8;F6QPU5;Q66L47;Q8CGK7	Q9DC51	Guanine nucleotide-binding protein G(k) subunit alpha
Gltp	21.2141	5	0	14.765	26.3531	6	Q9JL62;D3Z1H9;D3Z1H8	Q9JL62;D3Z1H9;D3Z1H8	Glycolipid transfer protein
Serinc3	21.2096	2	0	4.8111	25.8234	1	Q9QZI9	Q9QZI9	Serine incorporator 3
Picalm	21.2068	13	0	91.774	27.2501	17	Q7M6Y3;A0A1L1SUR7;A0A140LHG9;A0A087WSI9;Q3TWS4;E9Q9A3;E9QQ05;A0A5F8MPL3;E9QLK9;Q61548	Q7M6Y3;A0A1L1SUR7	Phosphatidylinositol-binding clathrin assembly protein
Atp6v1c1	21.2062	12	0	35.492	26.221	12	Q9Z1G3;A0A2I3BPD0;A0A2I3BQD9	Q9Z1G3	V-type proton ATPase subunit C 1
Top2a	21.2058	28	0	95.193	28.1044	27	Q01320	Q01320	DNA topoisomerase 2-alpha
Prkar1a	21.2039	9	0	37.622	27.4082	12	Q9DBC7;A2AI69;D3Z4L4;D3YTM5;D3Z068;D3Z0V6;P12849	Q9DBC7	cAMP-dependent protein kinase type I-alpha regulatory subunit;cAMP-dependent protein kinase type I-alpha regulatory subunit, N-terminally processed
Ethe1	21.1992	8	0	37.588	26.7594	9	Q9DCM0	Q9DCM0	Persulfide dioxygenase ETHE1, mitochondrial
Scamp4	21.199	1	0	3.2302	23.521	1	Q9JKV5	Q9JKV5	Secretory carrier-associated membrane protein 4
Sf3b3	21.1963	16	0	31.98	27.3515	18	Q921M3	Q921M3	Splicing factor 3B subunit 3
Endod1	21.1948	7	0	24.959	26.5686	5	Q8C522;A0A1L1SSA0	Q8C522	Endonuclease domain-containing 1 protein
Cox20	21.1933	2	0	4.3424	23.5152	2	Q9D7J4	Q9D7J4	Cytochrome c oxidase protein 20 homolog
Tfam	21.193	3	0	5.4526	25.5843	4	P40630;A0A0R4J1N9;D3Z0F3	P40630;A0A0R4J1N9	Transcription factor A, mitochondrial
Trmt112	21.1929	3	0	11.65	25.3247	3	Q8VCR4;Q9DCG9	Q8VCR4;Q9DCG9	Multifunctional methyltransferase subunit TRM112-like protein
Ngp	21.1925	7	0	16.76	25.7024	9	O08692	O08692	Neutrophilic granule protein
Rbm8a	21.1921	4	0	19.317	27.0364	5	Q9CWZ3;A0A0G2JEA9;A0A0G2JFX7;A0A0N4SUH6	Q9CWZ3;A0A0G2JEA9;A0A0G2JFX7;A0A0N4SUH6	RNA-binding protein 8A
Uqcrh	21.1878	1	0.00029797	2.344	23.9952	1	P99028	P99028	Cytochrome b-c1 complex subunit 6, mitochondrial
Gars	21.186	14	0	49.785	27.2816	19	Q9CZD3	Q9CZD3	Glycine--tRNA ligase
Slamf1	21.1859	5	0	20.974	27.2415	6	Q9QUM4	Q9QUM4	Signaling lymphocytic activation molecule
Slc29a1	21.1838	2	0	4.3736	24.6428	2	E9PXM6;Q9JIM1;E9Q221;E9Q503;E9Q3D1;E9PWD6;E9PZV0;E9PVH9;E9PXQ6;E9PWY7	E9PXM6;Q9JIM1;E9Q221;E9Q503;E9Q3D1;E9PWD6;E9PZV0;E9PVH9;E9PXQ6;E9PWY7	Equilibrative nucleoside transporter 1
Scamp1	21.1831	7	0	28.318	27.1297	8	Q8K021;Q3TSA8;D3YTP4	Q8K021;Q3TSA8	Secretory carrier-associated membrane protein 1
Itgal	21.1819	18	0	79.265	27.9067	22	E9QNL8;E9Q5M7;D3Z627;P24063;D3YW95	E9QNL8;E9Q5M7;D3Z627;P24063;D3YW95	Integrin alpha-L
Samm50	21.1808	9	0	30.739	26.5751	11	Q8BGH2	Q8BGH2	Sorting and assembly machinery component 50 homolog
Tmem30a	21.1787	6	0	21.3	25.9856	7	D3YVV1;Q8VEK0;Q8BHG3	D3YVV1;Q8VEK0	Cell cycle control protein 50A
Cybb	21.178	9	0	43.274	27.5527	14	Q61093;E9Q7S3;E9Q802	Q61093	Cytochrome b-245 heavy chain
H2-DMa	21.1776	2	0	5.6125	24.2936	3	Q31621;P28078	Q31621;P28078	Class II histocompatibility antigen, M alpha chain
Slc35f6	21.1752	2	0	10.805	25.9572	2	A0A0G2JEG3;Q8VE96	A0A0G2JEG3;Q8VE96	Solute carrier family 35 member F6
Purb	21.1743	7	0	30.613	25.8341	7	O35295	O35295	Transcriptional activator protein Pur-beta
Ctsh	21.1739	4	0	47.801	26.8563	5	P49935;A0A087WR20	P49935;A0A087WR20	Pro-cathepsin H;Cathepsin H mini chain;Cathepsin H;Cathepsin H heavy chain;Cathepsin H light chain
Cpne1	21.1714	14	0	42.354	27.2275	16	Q8C166;B7ZCP4;E9Q806;A3KGK7;B7ZCP6;B7ZCP5;B7ZCP7;V9GX86;B7ZCP8;V9GWY2;F6R587;V9GXM6	Q8C166;B7ZCP4;E9Q806;A3KGK7	Copine-1
Gart	21.1699	25	0	102.75	28.3223	28	Q64737;D6RCG1;A0A338P6X4;A0A338P676	Q64737	Trifunctional purine biosynthetic protein adenosine-3;Phosphoribosylamine--glycine ligase;Phosphoribosylformylglycinamidine cyclo-ligase;Phosphoribosylglycinamide formyltransferase
Cd40	21.1697	1	0	6.4006	22.7546	1	A2A5L7;P27512	A2A5L7;P27512	Tumor necrosis factor receptor superfamily member 5
Snrpg	21.1693	2	0	4.1864	22.7542	2	P62309	P62309	Small nuclear ribonucleoprotein G
Slc25a1	21.168	4	0	13.221	25.5086	4	Q8JZU2;F6VVY4	Q8JZU2;F6VVY4	Tricarboxylate transport protein, mitochondrial
Psmg4	21.1674	1	0.0025656	1.8311	23.4893	1	D3Z016;P0C7N9	D3Z016;P0C7N9	Proteasome assembly chaperone 4
Hk3	21.1655	17	0	45.858	27.8646	18	Q3TRM8;E9Q8S8;E9Q3Z4;D6RFA3;D3Z2E4	Q3TRM8;E9Q8S8;E9Q3Z4	Hexokinase-3;Hexokinase
Cbr3	21.1634	5	0	13.527	25.2964	5	Q8K354;A0A338P797	Q8K354;A0A338P797	Carbonyl reductase [NADPH] 3
Arrb2	21.1579	9	0	27.983	26.6899	10	Q91YI4;Q5F2D9;J3QNV6	Q91YI4;Q5F2D9	Beta-arrestin-2
Naa50	21.1573	3	0	5.3808	24.6168	2	Q6PGB6	Q6PGB6	N-alpha-acetyltransferase 50
Serbp1	21.1559	11	0	49.579	28.106	15	Q3UMP4;Q9CY58;A0A0N4SV32;A0A0N4SWH2;A0A0N4SUQ1;A0A0N4SUN8;A0A0N4SV40;A0A0N4SVK5	Q3UMP4;Q9CY58;A0A0N4SV32;A0A0N4SWH2;A0A0N4SUQ1;A0A0N4SUN8	Plasminogen activator inhibitor 1 RNA-binding protein
Dctn3	21.1545	2	0	9.9278	24.614	2	Q9Z0Y1;E9Q919	Q9Z0Y1;E9Q919	Dynactin subunit 3
Carhsp1	21.1544	2	0	5.9965	23.9617	2	Q9CR86	Q9CR86	Calcium-regulated heat stable protein 1
Tspan8	21.154	1	0	3.6595	24.324	1	Q8R3G9	Q8R3G9	Tetraspanin-8
Nudt21	21.1539	3	0	6.7628	25.0537	3	Q9CQF3;A0A1D5RLS2;A0A1D5RM23;A0A1D5RLT7	Q9CQF3;A0A1D5RLS2;A0A1D5RM23	Cleavage and polyadenylation specificity factor subunit 5
Eml2	21.1534	16	0	55.943	28.3645	21	E9QK48;Q7TNG5;D6RGM3;A0A0U1RQ42;A0A0U1RPM7	E9QK48;Q7TNG5;D6RGM3	Echinoderm microtubule-associated protein-like 2
Eif4e	21.153	5	0	8.6034	26.0983	6	P63073;A0A0G2JFB4;A0A0G2JGT5;A0A0G2JH04;A0A0G2JG98	P63073;A0A0G2JFB4;A0A0G2JGT5;A0A0G2JH04	Eukaryotic translation initiation factor 4E
Pdlim5	21.1518	15	0	68.651	27.7095	17	Q8CI51;D9J2Z9;D9J300;D9J301;D9J302;Q9CRA2;A0A0G2JGZ5;D9J303;F8WJI6;E9Q8P5;A0A0G2JEJ0	Q8CI51;D9J2Z9;D9J300;D9J301;D9J302	PDZ and LIM domain protein 5
Rtcb	21.1457	14	0	40.626	27.7378	17	Q99LF4	Q99LF4	tRNA-splicing ligase RtcB homolog
Arhgap25	21.1431	12	0	33.508	26.9001	13	Q8BYW1	Q8BYW1	Rho GTPase-activating protein 25
Eif3k	21.1426	4	0	19.425	27.055	8	Q9DBZ5;Q3TY56	Q9DBZ5;Q3TY56	Eukaryotic translation initiation factor 3 subunit K
Kpna2	21.1425	6	0	42.856	25.784	6	P52293;A2A600;A2A601;A6PW68	P52293	Importin subunit alpha-1
Acot13	21.138	2	0	5.0127	24.1559	2	Q9CQR4	Q9CQR4	Acyl-coenzyme A thioesterase 13;Acyl-coenzyme A thioesterase 13, N-terminally processed
Kalrn	21.1301	12	0	39.866	27.1489	15	D3Z534;D3Z532;D3Z535;D3Z4R2;F6QYT9;A2CG49	D3Z534;D3Z532;D3Z535;D3Z4R2;F6QYT9;A2CG49	Kalirin
Iars	21.1291	29	0	101.93	28.1832	30	Q8BU30;E9Q866;F6Q6R1	Q8BU30	Isoleucine--tRNA ligase, cytoplasmic
Gda	21.1286	13	0	34.826	27.5986	15	Q9R111;A0A494B982;D3YU09	Q9R111;A0A494B982;D3YU09	Guanine deaminase
Dnajc3	21.1284	13	0	45.465	27.4492	16	Q91YW3	Q91YW3	DnaJ homolog subfamily C member 3
Bphl	21.1195	10	0	30.557	26.5842	10	Q8R164	Q8R164	Valacyclovir hydrolase
Pcmt1	21.1177	7	0	16.721	26.8134	9	F7D432;E9PWE0;E0CYV0;P23506;F6V9F1;F6TXE3	F7D432;E9PWE0;E0CYV0;P23506;F6V9F1	Protein-L-isoaspartate O-methyltransferase;Protein-L-isoaspartate(D-aspartate) O-methyltransferase
Tmem19	21.116	1	0	2.7928	23.4378	1	A0A1W2P7R5;A0A1W2P7P6;Q91W52	A0A1W2P7R5;A0A1W2P7P6;Q91W52	Transmembrane protein 19
	21.1152	1	0.0076944	1.4411	23.1152	1	Q9CRC3	Q9CRC3	UPF0235 protein C15orf40 homolog
Dnaja1	21.115	9	0	24.896	27.0022	10	P63037;B1AXY1;B1AXX9;B1AXY0	P63037;B1AXY1	DnaJ homolog subfamily A member 1
Bcl2l1	21.1124	2	0	3.0805	24.1124	2	A2AHX9;Q9QWX2;Q64373;A2AHX8	A2AHX9;Q9QWX2;Q64373;A2AHX8	Bcl-2-like protein 1
Fdxr	21.1087	12	0	39.877	26.4326	14	Q61578	Q61578	NADPH:adrenodoxin oxidoreductase, mitochondrial
Prps2	21.1057	9	0	27.149	26.9932	13	Q9CS42	Q9CS42	Ribose-phosphate pyrophosphokinase 2
Btk	21.1051	16	0	55.821	27.7552	22	P35991;A2BDW0;Q6PFV6;E9PUQ0;E9PUP9;E9PUQ2;Q8C8K1;A2BDQ4;Q8BRB1;G1K381;E9PWK7;E9PUQ4;E0CYA3;B7ZNN5;P29319;Q8CBF3;Q03145;P54761;P54754;Q61772;O09127;Q60629;Q62413;P54763	P35991;A2BDW0	Tyrosine-protein kinase BTK
Erap1	21.1044	15	0	41.584	27.0021	17	Q9EQH2;A0A1Y7VMT6;A0A1Y7VNJ8;A0A1Y7VNY4	Q9EQH2	Endoplasmic reticulum aminopeptidase 1
Fabp4	21.1021	2	0	5.3371	24.1021	2	P04117	P04117	Fatty acid-binding protein, adipocyte
Ube2o	21.1018	27	0	93.382	29.0252	33	Q6ZPJ3	Q6ZPJ3	E2/E3 hybrid ubiquitin-protein ligase UBE2O
Hsdl1	21.0996	6	0	27.83	26.2442	6	Q8BTX9;A0A1D5RLG0;A0A1D5RM62	Q8BTX9;A0A1D5RLG0	Inactive hydroxysteroid dehydrogenase-like protein 1
Glipr2	21.0988	2	0	10.239	24.0988	2	Q9CYL5;B1AWD6	Q9CYL5;B1AWD6	Golgi-associated plant pathogenesis-related protein 1
Srp9	21.098	1	0	3.1075	23.4198	1	D3YZX8;P49962	D3YZX8;P49962	Signal recognition particle 9 kDa protein
Sec13	21.0962	4	0	14.446	25.2657	5	Q9D1M0	Q9D1M0	Protein SEC13 homolog
Alyref;Alyref2	21.0946	6	0	34.182	27.8774	15	O08583;G3X9I4;Q9JJW6	O08583;G3X9I4;Q9JJW6	THO complex subunit 4;Aly/REF export factor 2
Cyb5r1	21.0902	7	0	20.37	25.6113	7	Q9DB73;G3UZG6;G3UXV8;G3UZ57	Q9DB73;G3UZG6	NADH-cytochrome b5 reductase 1
Gls	21.0895	15	0	83.058	27.9346	17	D3Z7P3;D3Z7P4;F7B327	D3Z7P3;D3Z7P4	Glutaminase kidney isoform, mitochondrial
Igkv12-89	21.0891	1	0	4.3306	23.6152	3	A0A075B5L4;A0A0G2JGW8	A0A075B5L4;A0A0G2JGW8
Lactb	21.0885	6	0	17.663	26.0315	7	Q9EP89;A0A1L1SVF9	Q9EP89;A0A1L1SVF9	Serine beta-lactamase-like protein LACTB, mitochondrial
Aldh7a1	21.0873	9	0	32.654	26.4967	11	Q9DBF1;G3UYR8;G3UY72;E9Q1H3;E9Q1G1	Q9DBF1;G3UYR8;G3UY72	Alpha-aminoadipic semialdehyde dehydrogenase
Psmd8	21.0851	6	0	23.73	25.8093	6	Q9CX56;Q9CPS5;Q3TG45	Q9CX56;Q9CPS5;Q3TG45	26S proteasome non-ATPase regulatory subunit 8
Fubp1	21.0839	4	0	13.187	26.0381	4	Q3TUE1;A0A0G2JGW9;A0A0G2JFY5;Q3UUU2;Q91WJ8;A0A0G2JG00;A0A0G2JFK2	Q3TUE1;A0A0G2JGW9;A0A0G2JFY5;Q3UUU2;Q91WJ8;A0A0G2JG00;A0A0G2JFK2	Far upstream element-binding protein 1
Mcm2	21.0839	18	0	70.391	27.4659	18	P97310;A0A0N4SVY2	P97310	DNA replication licensing factor MCM2
Vdac1	21.0836	1	0	2.8092	24.7841	2	F2Z471	F2Z471
Nmral1	21.0823	6	0	12.428	26.2894	5	Q8K2T1;D3YU12;G5E8S7	Q8K2T1;D3YU12;G5E8S7	NmrA-like family domain-containing protein 1
Slc44a2	21.0754	8	0	20.064	27.2999	9	A0A1L1SVG6;Q8BY89	A0A1L1SVG6;Q8BY89	Choline transporter-like protein 2
Atp8a1	21.07	16	0	58.041	27.3122	16	A0A0M3HEP7;P70704;A0A0J9YV34;Q3U9N5;F6Q8P7;E9Q4J5;P98200	A0A0M3HEP7;P70704;A0A0J9YV34	Phospholipid-transporting ATPase IA
Srm	21.0658	10	0	21.654	27.0735	11	Q64674	Q64674	Spermidine synthase
Wars	21.0633	11	0	40.716	26.8866	10	P32921;E0CXX4;E0CXQ4	P32921	Tryptophan--tRNA ligase, cytoplasmic;T1-TrpRS;T2-TrpRS
Eif4h	21.0582	5	0	14.744	26.8427	8	Q9WUK2	Q9WUK2	Eukaryotic translation initiation factor 4H
Tmem55b	21.0545	5	0	10.832	25.0326	5	F8WHW3;Q3TWL2;E0CYE6;E0CZF6;E0CZ18	F8WHW3;Q3TWL2;E0CYE6;E0CZF6;E0CZ18	Type 1 phosphatidylinositol 4,5-bisphosphate 4-phosphatase
Rrbp1	21.0518	23	0	148.44	28.7837	27	A2AVJ7;Q99PL5	A2AVJ7;Q99PL5	Ribosome-binding protein 1
Rassf4	21.0507	1	0	4.3011	22.6356	1	A0A0N4SVF1;Q8CB96	A0A0N4SVF1;Q8CB96	Ras association domain-containing protein 4
Ndufb9	21.0495	6	0	18.244	26.3804	6	Q9CQJ8	Q9CQJ8	NADH dehydrogenase [ubiquinone] 1 beta subcomplex subunit 9
Ppp2r2a	21.0471	7	0	18.36	26.2944	8	Q9CWU3;Q6P1F6;Q925E7;A0A286YDJ9;A0A494B941;G3UXS9;A0A494B8Z0;F6RV17;A0A668KLA9;Q6ZWR4;Q8BG02	Q9CWU3;Q6P1F6	Serine/threonine-protein phosphatase 2A 55 kDa regulatory subunit B;Serine/threonine-protein phosphatase 2A 55 kDa regulatory subunit B alpha isoform
	21.0433	1	0.0025626	1.8247	23.3652	1	A0A1L1STD6	A0A1L1STD6
Plbd2	21.0431	7	0	24.845	26.6012	9	Q3TCN2	Q3TCN2	Putative phospholipase B-like 2;Putative phospholipase B-like 2 28 kDa form;Putative phospholipase B-like 2 40 kDa form;Putative phospholipase B-like 2 15 kDa form
Eftud2	21.0411	19	0	47.19	27.7693	19	A2AH85;O08810;G3UZ34;G3UXK8	A2AH85;O08810;G3UZ34	116 kDa U5 small nuclear ribonucleoprotein component
Ppp1r14a	21.0402	3	0	9.8688	24.6766	5	Q91VC7;A0A140LI58	Q91VC7	Protein phosphatase 1 regulatory subunit 14A
Dynlrb1	21.0397	2	0	9.2764	23.6246	2	P62627;A2AVR9	P62627;A2AVR9	Dynein light chain roadblock-type 1
Tmed4	21.0381	2	0	9.3529	24.7386	2	Q8R1V4;Q5SVW9	Q8R1V4;Q5SVW9	Transmembrane emp24 domain-containing protein 4
Diap1;Diaph1	21.0338	23	0	86.09	28.3136	30	E9PXV7;E9PV41;O08808;F6XC54;D3Z074	E9PXV7;E9PV41;O08808;F6XC54;D3Z074	Protein diaphanous homolog 1
	21.0338	7	0	31.899	25.6539	6	Q9CQE8	Q9CQE8	UPF0568 protein C14orf166 homolog
Cryz	21.0335	3	0	7.9009	24.3083	3	D3YUG9;V9GXY8;A0A0A6YXR4;P47199;D3YWU6;D3Z4Q4;D3Z2X0;A0A0A6YVS7	D3YUG9;V9GXY8;A0A0A6YXR4;P47199;D3YWU6;D3Z4Q4;D3Z2X0;A0A0A6YVS7	Quinone oxidoreductase
Slc40a1	21.0325	4	0	18.8	27.2759	9	Q9JHI9	Q9JHI9	Solute carrier family 40 member 1
H2afy	21.0321	7	0	28.053	26.6429	8	Q9QZQ8;Q8CCK0	Q9QZQ8	Core histone macro-H2A.1
S100a10	21.028	1	0.0028249	1.7253	23.028	1	P08207	P08207	Protein S100-A10
Cd84	21.0218	3	0	16.865	25.1918	3	E9Q9E8;A0A0R4J0K5;Q18PI6;A0A0R4J1S4	E9Q9E8;A0A0R4J0K5;Q18PI6;A0A0R4J1S4	SLAM family member 5
Apbb1ip	21.0205	12	0	28.894	26.8666	13	Q8R5A3;S4R2K5;F2Z4B7;G5E867;F2Z3U3	Q8R5A3	Amyloid beta A4 precursor protein-binding family B member 1-interacting protein
Glrx3	21.0186	7	0	25.923	26.088	7	Q9CQM9;A0A1B0GS58;A0A1B0GT04	Q9CQM9;A0A1B0GS58	Glutaredoxin-3
Inpp1	21.0178	5	0	43.245	25.3652	6	P49442;E0CYQ4;E0CX64;H3BK26	P49442	Inositol polyphosphate 1-phosphatase
Tap2	21.0176	12	0	63.831	27.4542	13	P36371	P36371	Antigen peptide transporter 2
Npl	21.0161	7	0	43.2	25.722	7	Q9DCJ9	Q9DCJ9	N-acetylneuraminate lyase
Myl1;Myl3	21.016	2	0	5.6319	26.1343	1	A0A087WRZ7;A0A0G2JDM3;E9PWG4;A0A0G2JDW2;P05977;P09542	A0A087WRZ7;A0A0G2JDM3;E9PWG4;A0A0G2JDW2;P05977;P09542	Myosin light chain 1/3, skeletal muscle isoform;Myosin light chain 3
Cnbp	21.0156	2	0	15.899	25.8544	2	A0A0N4SVS6;P53996	A0A0N4SVS6;P53996	Cellular nucleic acid-binding protein
Tpp2	21.0151	25	0	79.025	27.7913	26	Q64514;A0A087WRC0;Q05DJ9;A0A087WQR6;A0A087WP19	Q64514;A0A087WRC0	Tripeptidyl-peptidase 2
Nfu1	21.0074	4	0	8.2454	26.4038	5	Q9QZ23;A0A0N4SUH8;D3Z285	Q9QZ23;A0A0N4SUH8;D3Z285	NFU1 iron-sulfur cluster scaffold homolog, mitochondrial
Vwa5a	21.004	12	0	52.085	26.6396	12	Q99KC8;D3Z671;F6TIL5;Q8BGF0	Q99KC8	von Willebrand factor A domain-containing protein 5A
Ubl4a;Ubl4	21.0033	2	0	3.21	24.0033	2	P21126;F8WHM4	P21126;F8WHM4	Ubiquitin-like protein 4A
Mtap	21.0029	8	0	23.288	26.2394	9	Q9CQ65	Q9CQ65	S-methyl-5-thioadenosine phosphorylase
AK157302;Isca1	21.0019	1	0.00030358	2.5514	24.1718	0	I3ITR1;Q9D924	I3ITR1;Q9D924	Iron-sulfur cluster assembly 1 homolog, mitochondrial
Rpa2	20.9979	3	0	5.3247	25.221	3	Q62193;Q3TE40;F6V8R7	Q62193;Q3TE40	Replication protein A 32 kDa subunit
Vbp1	20.9975	6	0	17.647	26.8018	7	P61759;Q3TIR6	P61759;Q3TIR6	Prefoldin subunit 3
Chmp5	20.9958	2	0	4.7447	23.5807	2	Q9D7S9	Q9D7S9	Charged multivesicular body protein 5
Rgs18	20.9931	8	0	25.915	27.1898	8	Q99PG4	Q99PG4	Regulator of G-protein signaling 18
Mrc1	20.9875	27	0	81.002	27.7114	28	Q61830	Q61830	Macrophage mannose receptor 1
Hnrnph1	20.987	2	0	9.1636	25.2918	3	Q8C2Q7;O35737	Q8C2Q7;O35737	Heterogeneous nuclear ribonucleoprotein H;Heterogeneous nuclear ribonucleoprotein H, N-terminally processed
Camk1	20.9863	5	0	10.326	25.2983	5	Q91YS8;D3Z368	Q91YS8;D3Z368	Calcium/calmodulin-dependent protein kinase type 1
Acly	20.9833	26	0	87.705	29.473	27	Q3V117;Q91V92;Q3TS02	Q3V117;Q91V92	ATP-citrate synthase
Dera	20.9829	5	0	18.247	25.9507	4	Q91YP3;A0A0N4SV34;A0A0N4SVH5;A0A0N4SUT8;A0A0N4SVW1;A0A0N4SUV7	Q91YP3;A0A0N4SV34	Deoxyribose-phosphate aldolase
Cope	20.9808	10	0	42.859	27.0427	13	O89079;D3Z315;F6YFR7;E9Q6I5;F6XIG5	O89079;D3Z315;F6YFR7	Coatomer subunit epsilon
Mrpl21	20.9808	4	0	8.3084	24.8043	5	Q9D1N9	Q9D1N9	39S ribosomal protein L21, mitochondrial
Man2b1	20.9795	16	0	69.492	27.3509	19	O09159	O09159	Lysosomal alpha-mannosidase
Hibadh	20.979	7	0	16.194	25.9131	7	Q99L13	Q99L13	3-hydroxyisobutyrate dehydrogenase, mitochondrial
Evi2b	20.9755	2	0	5.058	25.4713	1	Q8VD58	Q8VD58	Protein EVI2B
Emc7	20.9753	2	0	4.2482	24.2972	2	Q9EP72	Q9EP72	ER membrane protein complex subunit 7
Coro7	20.9752	18	0	59.911	27.4846	19	Q9D2V7;G3X9L5;E9PYU1	Q9D2V7	Coronin-7
Pla2g16	20.9706	2	0	3.0989	24.616	2	Q8R3U1	Q8R3U1	HRAS-like suppressor 3
F10	20.9696	5	0	7.767	25.3619	5	Q3U3V1;O88947;D3Z521;D3Z215	Q3U3V1;O88947;D3Z521;D3Z215	Coagulation factor X;Factor X light chain;Factor X heavy chain;Activated factor Xa heavy chain
Serpina3m;Serpina3k	20.9629	7	0	28.817	25.7786	7	A0A0R4J0I1;Q03734;P07759;E9Q499;F2Z405;G3X8T9;P29621;Q91WP6;Q5I2A0;Q80X76	A0A0R4J0I1;Q03734;P07759	Serine protease inhibitor A3M;Serine protease inhibitor A3K
Flii	20.959	28	0	113.86	28.0927	31	Q9JJ28	Q9JJ28	Protein flightless-1 homolog
Txndc12	20.9587	1	0.0055525	1.5763	24.2807	1	Q9CQU0	Q9CQU0	Thioredoxin domain-containing protein 12
Igha	20.9585	6	0	58.614	26.8251	7	A0A0A6YXW6;A0A075B6A3;P01878	A0A0A6YXW6;A0A075B6A3;P01878	Ig alpha chain C region
Pih1d1	20.9582	1	0	6.428	23.2801	1	A0A1B0GQV4;A0A1B0GSA4;A0A1B0GRL0;Q9CQJ2	A0A1B0GQV4;A0A1B0GSA4;A0A1B0GRL0;Q9CQJ2	PIH1 domain-containing protein 1
Gna13	20.9562	9	0	24.364	26.0229	9	P27601;Q9D034	P27601	Guanine nucleotide-binding protein subunit alpha-13
Inf2	20.9543	22	0	114.37	28.746	31	E9QLA5;Q0GNC1;A0A1Y7VM80	E9QLA5;Q0GNC1;A0A1Y7VM80	Inverted formin-2
Srp14	20.9533	2	0	7.4841	23.2753	2	A2AUM6;P16254	A2AUM6;P16254	Signal recognition particle 14 kDa protein;Signal recognition particle 14 kDa protein, N-terminally processed
Vkorc1l1	20.9513	2	0.00058824	2.1934	23.7587	2	Q6TEK5;A0A0J9YUN6;Q0VGU5;A0A0M3HEP8	Q6TEK5;A0A0J9YUN6;Q0VGU5;A0A0M3HEP8	Vitamin K epoxide reductase complex subunit 1-like protein 1
Gabarapl2	20.9481	4	0	7.9079	25.2067	4	P60521	P60521	Gamma-aminobutyric acid receptor-associated protein-like 2
Igkv1-132	20.9478	1	0	8.1132	23.5328	1	A0A0B4J1H9	A0A0B4J1H9
Acadsb	20.9461	2	0	9.8961	25.3384	2	E9Q5L3;Q9DBL1	E9Q5L3;Q9DBL1	Short/branched chain specific acyl-CoA dehydrogenase, mitochondrial
Hmha1	20.9424	15	0	47.957	27.8457	20	G3X9Q3;Q3TBD2;D3Z7R7	G3X9Q3;Q3TBD2;D3Z7R7	Minor histocompatibility protein HA-1
Isyna1	20.9409	10	0	33.413	27.0185	15	Q9JHU9;A0A1B0GS86	Q9JHU9	Inositol-3-phosphate synthase 1
Adpgk	20.9401	9	0	33.378	25.5855	9	Q3UDS7;A0A1L1SSF2;Q8VDL4	Q3UDS7;A0A1L1SSF2;Q8VDL4	ADP-dependent glucokinase
Chtop	20.9396	1	0.0095109	1.3563	23.7469	1	D3YZA1;D3Z7T7;E9PW20;Q9CY57	D3YZA1;D3Z7T7;E9PW20;Q9CY57	Chromatin target of PRMT1 protein
Lrrc47	20.9386	17	0	38.064	27.2186	25	Q505F5;E9PV22;F6Z4L9;F6YT33	Q505F5;E9PV22	Leucine-rich repeat-containing protein 47
Arpc1a	20.936	11	0	42.77	28.1269	16	Q9R0Q6;A0A0G2JF52;D3YVI5	Q9R0Q6;A0A0G2JF52	Actin-related protein 2/3 complex subunit 1A
Cbl	20.9348	11	0	29.949	26.8169	12	A0A0U1RQ85;P22682;A0A0U1RP47;A0A0X1KG61;A0A0U1RP17;A0A0U1RP95;B9EKI5;Q3TTA7	A0A0U1RQ85;P22682;A0A0U1RP47;A0A0X1KG61	E3 ubiquitin-protein ligase CBL
Ndufs4	20.9319	4	0	9.8914	25.8526	5	Q9CXZ1;E9QPX3;A0A338P7A0	Q9CXZ1;E9QPX3	NADH dehydrogenase [ubiquinone] iron-sulfur protein 4, mitochondrial
Pabpn1;Gm20521	20.9256	2	0	6.4504	24.6261	2	G3UY42;Q8CCS6;G3UX74;D3YUB9;D3Z055;G3UWS5;D3Z5F7	G3UY42;Q8CCS6;G3UX74;D3YUB9;D3Z055;G3UWS5;D3Z5F7	Polyadenylate-binding protein 2
Pfkp	20.9242	14	0	66.505	26.8434	18	Q8C605;Q9WUA3;D3YUA3;F6YL81	Q8C605;Q9WUA3	ATP-dependent 6-phosphofructokinase;ATP-dependent 6-phosphofructokinase, platelet type
Rnpep	20.9191	14	0	71.223	27.2147	14	Q8VCT3;E9PYF1	Q8VCT3;E9PYF1	Aminopeptidase B
Itgax	20.919	15	0	50.291	27.3806	13	Q9QXH4	Q9QXH4	Integrin alpha-X
Srprb	20.9131	6	0	25.205	26.1642	5	P47758	P47758	Signal recognition particle receptor subunit beta
Cbx1	20.9123	2	0	5.3021	23.2343	2	Q7TPM0;Q9CYJ8;P83917	Q7TPM0;Q9CYJ8;P83917	Chromobox protein homolog 1
Cmpk2	20.9099	9	0	39.099	26.9878	10	Q3U5Q7	Q3U5Q7	UMP-CMP kinase 2, mitochondrial
Pepd	20.9023	8	0	29.483	25.9991	7	Q11136;G3UXC5	Q11136	Xaa-Pro dipeptidase
Ahsp	20.9022	2	0	4.2727	24.1422	2	Q9CY02	Q9CY02	Alpha-hemoglobin-stabilizing protein
Pklr	20.9001	14	0	60.935	27.1023	15	G3X925;P53657;E9Q509;D3Z2C4	G3X925;P53657;E9Q509	Pyruvate kinase;Pyruvate kinase PKLR
Cops4	20.8981	10	0	28.908	26.6802	12	O88544;F6QTS1;D3YV99;D3Z1R9	O88544;F6QTS1;D3YV99	COP9 signalosome complex subunit 4
Tmed3	20.8981	3	0	7.9307	24.3575	3	Q78IS1	Q78IS1	Transmembrane emp24 domain-containing protein 3
Hpse	20.8975	8	0	16.142	26.9423	9	Q6YGZ1;D3Z3C3	Q6YGZ1;D3Z3C3	Heparanase;Heparanase 8 kDa subunit;Heparanase 50 kDa subunit
Ociad1	20.8967	6	0	21.732	25.8335	7	A0A0J9YUK7;Q9CRD0;A0A0J9YTV7;A0A0J9YUB6;A0A0J9YTV6	A0A0J9YUK7;Q9CRD0;A0A0J9YTV7	OCIA domain-containing protein 1
Sf3b1	20.8967	18	0	86.129	27.5448	16	G5E866;Q99NB9	G5E866;Q99NB9	Splicing factor 3B subunit 1
Serhl	20.893	1	0.0071645	1.472	22.4779	1	F6TMN2;Q3U3G8;Q9EPB5	F6TMN2;Q3U3G8;Q9EPB5	Serine hydrolase-like protein
Itgb5	20.8916	5	0	13.712	26.7325	5	Q6PE70;O70309;G5E8F8;A0A338P795	Q6PE70;O70309;G5E8F8	Integrin beta;Integrin beta-5
Cd2ap	20.8898	17	0	51.587	27.3349	19	Q9JLQ0;A0A3B2W812	Q9JLQ0;A0A3B2W812	CD2-associated protein
Mrps9	20.8878	2	0	5.6016	23.6952	2	A0A0J9YU02;Q9D7N3	A0A0J9YU02;Q9D7N3	28S ribosomal protein S9, mitochondrial
Rpa3	20.8873	4	0	6.6811	23.8873	4	Q9CQ71	Q9CQ71	Replication protein A 14 kDa subunit
Actbl2	20.8846	1	0	5.0123	27.6651	4	Q8BFZ3	Q8BFZ3	Beta-actin-like protein 2
Uap1l1	20.8822	14	0	53.201	26.3932	16	Q3TW96	Q3TW96	UDP-N-acetylhexosamine pyrophosphorylase-like protein 1
Pgm1;Pgm2	20.8819	14	0	45.915	26.8252	14	Q9D0F9;A2CEK3	Q9D0F9;A2CEK3	Phosphoglucomutase-1
Isoc2a	20.8816	7	0	38.391	27.4233	14	P85094	P85094	Isochorismatase domain-containing protein 2A, mitochondrial
Mylk	20.8768	17	0	47.217	28.2455	18	B1B1A8;Q6PDN3	B1B1A8;Q6PDN3	Myosin light chain kinase, smooth muscle;Myosin light chain kinase, smooth muscle, deglutamylated form
Apoc1	20.8753	1	0.0025532	1.7792	22.4603	1	P34928	P34928	Apolipoprotein C-I;Truncated apolipoprotein C-I
Ndrg1	20.8722	4	0	18.457	26.0125	6	Q62433;E9Q514;E9Q0J8;E9PZC7;E9Q7G8;E9Q147;E9Q7V2;E9Q5I8;E9Q3F9;E9PVF3	Q62433;E9Q514	Protein NDRG1
Slc25a10	20.8681	6	0	9.7523	25.9647	7	Q9QZD8	Q9QZD8	Mitochondrial dicarboxylate carrier
Cpa1	20.8677	8	0	22.004	26.6644	9	Q7TPZ8	Q7TPZ8	Carboxypeptidase A1
Rtn1	20.8673	2	0.00029771	2.334	25.9828	1	Q8K0T0	Q8K0T0	Reticulon-1
Hmgcs2	20.8648	8	0	16.44	26.0553	10	P54869;Q8JZK9	P54869	Hydroxymethylglutaryl-CoA synthase, mitochondrial
Ddb1	20.8626	19	0	83.723	27.5449	20	Q3U1J4;A0A494BAF6;A0A494B987;A0A494BBJ6	Q3U1J4	DNA damage-binding protein 1
Tram1	20.8623	2	0	4.8057	24.5628	5	Q91V04	Q91V04	Translocating chain-associated membrane protein 1
H2-DMb1	20.8617	3	0	10.392	26.0937	5	Q31094;P35737	Q31094
Cyfip1	20.8598	14	0	37.636	27.3966	16	Q7TMB8;A0A0R4J119;A0A0U1RQ05;G3UZI5	Q7TMB8;A0A0R4J119;A0A0U1RQ05	Cytoplasmic FMR1-interacting protein 1
Ddx6	20.8596	11	0	43.969	27.2795	13	P54823	P54823	Probable ATP-dependent RNA helicase DDX6
Ighg2b;Igh-3	20.8583	3	0	17.568	28.18	6	A0A075B5P3;A0A0A6YVP0;P01867	A0A075B5P3;A0A0A6YVP0;P01867	Ig gamma-2B chain C region
Tmem109	20.856	1	0	3.3674	23.1779	1	D3Z7P2;D3Z3Z2;D3YX08;D3Z0I8;Q3UBX0	D3Z7P2;D3Z3Z2;D3YX08;D3Z0I8;Q3UBX0	Transmembrane protein 109
Ahcyl2	20.8554	8	0	13.573	26.6384	7	F8WGT1;Q68FL4;H3BKT5;F8WI65;A0A0N4SUY4;E9PX77;F7ATQ6;D3Z2Q0;H3BL31;D3YYM7	F8WGT1;Q68FL4;H3BKT5;F8WI65	Adenosylhomocysteinase;Putative adenosylhomocysteinase 3
Cdipt	20.8551	1	0.00029718	2.3184	23.177	1	A0A0U1RP60;A0A0U1RNI6;A0A0U1RPV3;A0A0U1RP13;A0A0U1RQ57;Q8VDP6	A0A0U1RP60;A0A0U1RNI6;A0A0U1RPV3;A0A0U1RP13;A0A0U1RQ57;Q8VDP6	CDP-diacylglycerol--inositol 3-phosphatidyltransferase
Tceb2	20.8543	4	0	11.322	25.531	4	A0A3B2WBM3;P62869	A0A3B2WBM3;P62869	Transcription elongation factor B polypeptide 2
Rab27a	20.85	3	0	8.8203	25.359	4	Q9ERI2	Q9ERI2	Ras-related protein Rab-27A
Pon3	20.8496	8	0	17.372	25.8235	9	Q62087;H3BL07	Q62087	Serum paraoxonase/lactonase 3
	20.8483	1	0	10.285	24.9358	1	A0A140LHQ8	A0A140LHQ8
Slc6a4	20.8457	2	0	13.74	25.8112	4	Q60857;Q5NCR5	Q60857;Q5NCR5	Sodium-dependent serotonin transporter;Transporter
Eif1b;Eif1	20.8421	1	0	6.4033	23.1641	2	A0A1L1SSA3;Q9CXU9;J3QN87;J3QPZ8	A0A1L1SSA3;Q9CXU9;J3QN87	Eukaryotic translation initiation factor 1b
Slc16a3	20.8419	3	0	5.083	25.0118	3	P57787	P57787	Monocarboxylate transporter 4
Vta1	20.839	5	0	13.45	25.3355	5	Q9CR26;F6W5Q8;F8WJC2	Q9CR26;F6W5Q8	Vacuolar protein sorting-associated protein VTA1 homolog
Vcam1	20.8365	11	0	45.697	26.8517	12	P29533;Q3UPN1;A0A0G2JFP9	P29533;Q3UPN1;A0A0G2JFP9	Vascular cell adhesion protein 1
Uchl5	20.8358	7	0	19.539	26.115	10	Q9WUP7;A0A087WP81;A0A087WRL3	Q9WUP7;A0A087WP81	Ubiquitin carboxyl-terminal hydrolase isozyme L5
Crip1	20.8341	2	0	7.8086	27.3843	8	A0A0G2JEK2;P63254	A0A0G2JEK2;P63254	Cysteine-rich protein 1
Nmt1	20.8341	8	0	30.982	26.9229	9	O70310;F7APP3;A2AJH3;O70311	O70310	Glycylpeptide N-tetradecanoyltransferase 1
Sf3a1	20.8339	12	0	32.303	27.138	19	Q8K4Z5	Q8K4Z5	Splicing factor 3A subunit 1
Lars	20.8314	25	0	71.443	27.7069	26	Q8BMJ2;A0A494BBF9;A0A494BA98;A0A494BA30	Q8BMJ2	Leucine--tRNA ligase, cytoplasmic
Rab39a	20.8273	1	0	5.0723	24.7342	1	Q8BHD0	Q8BHD0	Ras-related protein Rab-39A
Edf1	20.8267	3	0	8.2771	25.5644	4	Q9JMG1	Q9JMG1	Endothelial differentiation-related factor 1
Lamtor5	20.824	1	0	4.7606	23.6313	1	G3UW70;Q9D1L9	G3UW70;Q9D1L9	Ragulator complex protein LAMTOR5
Rer1	20.8214	3	0	11.859	26.9931	6	Q9CQU3	Q9CQU3	Protein RER1
Rnf114	20.8214	4	0	10.306	26.623	5	Q9ET26;S4R1Z0	Q9ET26	E3 ubiquitin-protein ligase RNF114
Pcnp	20.819	2	0	8.1469	24.1409	1	F8WI88;Q6P8I4;D3YWA4;Q3TM89	F8WI88;Q6P8I4;D3YWA4;Q3TM89	PEST proteolytic signal-containing nuclear protein
Sec23b	20.8173	13	0	42.863	26.4794	13	Q9D662;A2ANA0;A2AN98;A2AN99;A2AN97	Q9D662;A2ANA0	Protein transport protein Sec23B
Lman1	20.8154	7	0	43.272	27.1766	8	Q9D0F3;D3Z5B9	Q9D0F3	Protein ERGIC-53
Gmpr	20.8143	7	0	53.927	27.4853	10	Q9DCZ1;F6VY18	Q9DCZ1;F6VY18	GMP reductase 1
Srgap2;Srgap1	20.8134	1	0.00030694	2.6718	22.3983	1	A0A087WNR5;A0A087WRV4;A0A087WNM1;D3YZW1;Q91Z69;Q91Z67	A0A087WNR5;A0A087WRV4;A0A087WNM1;D3YZW1;Q91Z69;Q91Z67	SLIT-ROBO Rho GTPase-activating protein 1;SLIT-ROBO Rho GTPase-activating protein 2
Rab22a;Rab31	20.8088	3	0	7.8113	24.5616	3	P35285;A2ARZ7;Q3TXV4;Q921E2;Q3TM43;D6RFT6	P35285;A2ARZ7;Q3TXV4;Q921E2	Ras-related protein Rab-22A;Ras-related protein Rab-31
Icam1	20.8068	4	0	8.1374	25.5617	3	P13597	P13597	Intercellular adhesion molecule 1
Psmb7	20.8062	3	0	9.4319	25.196	4	P70195	P70195	Proteasome subunit beta type-7
Hpx	20.8055	9	0	20.074	26.7073	10	Q91X72;A0A1B0GS57	Q91X72	Hemopexin
Snrnp70	20.8042	6	0	15.004	26.4826	7	Q62376;A0A1B0GRR8;A0A1B0GR69;A0A1B0GR44;A0A1B0GRV8;A0A1B0GSX5;A0A1B0GR50	Q62376;A0A1B0GRR8;A0A1B0GR69;A0A1B0GR44	U1 small nuclear ribonucleoprotein 70 kDa
Bzw1	20.8025	10	0	21.218	25.8379	10	A0A087WQS2;Q9CQC6;A0A087WPF9;A0A087WS48	A0A087WQS2;Q9CQC6;A0A087WPF9	Basic leucine zipper and W2 domain-containing protein 1
Aaas	20.8008	3	0	6.8287	25.5123	2	P58742;A0A2R8VI65	P58742	Aladin
Opa3	20.7993	2	0	6.3226	23.8394	2	Q505D7	Q505D7	Optic atrophy 3 protein homolog
Myo1g	20.7971	21	0	52.521	27.8849	22	Q5SUA5;A8Y5I5;Q5SYD0	Q5SUA5	Unconventional myosin-Ig
Sumo1	20.795	1	0	4.1894	23.3801	1	A0A087WRQ4;P63166	A0A087WRQ4;P63166	Small ubiquitin-related modifier 1
Rraga;Rragb	20.7939	6	0	14.932	25.6912	6	Q80X95;Q6NTA4;G3UYP1	Q80X95;Q6NTA4	Ras-related GTP-binding protein A;Ras-related GTP-binding protein B
Rbm14	20.7923	6	0	29.599	25.9776	6	Q8C2Q3;E9QL13;J3QN51;J3QPT3;B0LM42;F7BGR7	Q8C2Q3;E9QL13	RNA-binding protein 14
Sugt1	20.787	6	0	47.399	26.4038	8	Q9CX34	Q9CX34	Suppressor of G2 allele of SKP1 homolog
Mrpl43	20.7856	2	0	5.1123	24.245	2	Q5RL20;Q99N89	Q5RL20;Q99N89	39S ribosomal protein L43, mitochondrial
Eif3m	20.7851	5	0	10.863	26.0169	6	Q99JX4;A2A702;A2A701	Q99JX4;A2A702	Eukaryotic translation initiation factor 3 subunit M
Tmem261	20.7839	1	0.0014489	2.0046	22.3688	1	Q9CQ00	Q9CQ00	Transmembrane protein 261
Nudt5	20.7813	2	0	5.7698	24.2407	2	Q9JKX6;A0A0A6YVU1;A2ATT5	Q9JKX6;A0A0A6YVU1;A2ATT5	ADP-sugar pyrophosphatase
Gucy1b3	20.7812	8	0	22.122	26.5284	9	Q80YP4;O54865	Q80YP4;O54865	Guanylate cyclase soluble subunit beta-1
Cpq	20.7779	4	0	21.673	26.5946	4	Q9WVJ3;A0A2I3BPG0;A0A2I3BS14	Q9WVJ3;A0A2I3BPG0;A0A2I3BS14	Carboxypeptidase Q
Tor1aip2	20.7776	2	0	3.2516	25.237	2	Q8BYU6	Q8BYU6	Torsin-1A-interacting protein 2
Cbfb	20.7768	3	0	10.396	24.854	5	Q08024	Q08024	Core-binding factor subunit beta
Alg2	20.7717	6	0	15.757	25.528	5	Q9DBE8;F6RBY3	Q9DBE8;F6RBY3	Alpha-1,3/1,6-mannosyltransferase ALG2
Vps25	20.7707	6	0	9.9696	25.3169	6	Q9CQ80;A2A4J8;A8XY17;A2A4K0;E9PXS9	Q9CQ80;A2A4J8;A8XY17;A2A4K0;E9PXS9	Vacuolar protein-sorting-associated protein 25
Snx9	20.7697	7	0	27.21	25.8858	7	Q91VH2	Q91VH2	Sorting nexin-9
Psmd7	20.7638	10	0	33.401	27.4384	13	P26516	P26516	26S proteasome non-ATPase regulatory subunit 7
Ndufaf2	20.7638	3	0	15.524	24.3487	3	Q59J78;A0A286YDL9;A0A286YE33;A0A286YE75	Q59J78	Mimitin, mitochondrial
	20.7624	1	0.00030166	2.4813	23.0843	1	A0A140T8M1;P01646;P01645;P01644	A0A140T8M1;P01646;P01645;P01644	Ig kappa chain V-V region HP 123E6;Ig kappa chain V-V region HP 93G7;Ig kappa chain V-V region HP R16.7
Abhd11	20.7624	4	0	10.527	25.0902	5	D3YYK0;Q8K4F5	D3YYK0;Q8K4F5	Alpha/beta hydrolase domain-containing protein 11
Itih4	20.7608	7	0	19.301	26.5064	8	A0A2K6EDJ7;E9Q5L2;E9PVD2;A6X935;CON__Q3T052	A0A2K6EDJ7;E9Q5L2;E9PVD2;A6X935	Inter alpha-trypsin inhibitor, heavy chain 4
Acot9	20.759	12	0	28.455	26.9993	14	Q9R0X4;Q32MW3	Q9R0X4	Acyl-coenzyme A thioesterase 9, mitochondrial
Mff	20.7548	5	0	16.313	25.132	5	F7CTF8;E0CYI3;E0CYB9;Q6PCP5;F7BC60;F7B1A4;F6VAL0	F7CTF8;E0CYI3;E0CYB9;Q6PCP5	Mitochondrial fission factor
Aldh3a2	20.7482	7	0	15.906	25.4906	6	B1AV77;B1ATI0;P47740;P47739	B1AV77;B1ATI0;P47740	Aldehyde dehydrogenase;Fatty aldehyde dehydrogenase
Bre	20.7473	3	0	14.631	24.9173	3	D3Z7P0;Q8K3W0;A0A0J9YV56;E9Q0U3;E9Q8Q1	D3Z7P0;Q8K3W0;A0A0J9YV56;E9Q0U3	BRCA1-A complex subunit BRE
Dok2	20.7462	4	0	14.126	25.5003	6	O70469	O70469	Docking protein 2
Srsf6	20.7446	2	0	10.229	25.4598	3	Q3TWW8	Q3TWW8	Serine/arginine-rich splicing factor 6
Slc25a20	20.7446	4	0	8.7943	25.9037	4	Q9Z2Z6	Q9Z2Z6	Mitochondrial carnitine/acylcarnitine carrier protein
Copg2	20.7443	9	0	40.791	27.2597	13	Q9QXK3	Q9QXK3	Coatomer subunit gamma-2
Tars	20.7356	13	0	35.442	26.6477	14	Q9D0R2;A0A2I3BPK8	Q9D0R2	Threonine--tRNA ligase, cytoplasmic
Celf2	20.7324	6	0	23.919	25.8155	6	A0A0R4J2B0;V9GX43;S4R2U7;S4R1S7;E9QA47;Q9Z0H4;S4R2J2;S4R2L5;A3KGT0;S4R2S7;A0A0R4J0T5;P28659	A0A0R4J2B0;V9GX43;S4R2U7;S4R1S7;E9QA47;Q9Z0H4;S4R2J2;S4R2L5;A3KGT0	CUGBP Elav-like family member 2
Ncf4	20.7285	5	0	10.475	24.9123	5	A8XU21;P97369	A8XU21;P97369	Neutrophil cytosol factor 4
Pdcd4	20.7264	6	0	26.792	26.0552	6	Q61823;A0A494BA05	Q61823;A0A494BA05	Programmed cell death protein 4
Mat2b	20.7264	6	0	28.078	25.6864	5	Q99LB6;E0CYU5	Q99LB6	Methionine adenosyltransferase 2 subunit beta
Tmem43	20.7258	5	0	11.968	25.8217	5	Q9DBS1	Q9DBS1	Transmembrane protein 43
Lnpep	20.7254	9	0	15.128	26.568	7	Q8C129	Q8C129	Leucyl-cystinyl aminopeptidase
Rab1	20.7237	1	0.00030404	2.5612	24.6306	2	Q5SW88;A0A494BBL7;Q5SW87;Q5SW86	Q5SW88;A0A494BBL7;Q5SW87
Rp2	20.7217	7	0	17.193	25.2943	8	Q9EPK2	Q9EPK2	Protein XRP2
Crkl	20.7198	12	0	32.458	26.2184	11	P47941;A0A338P675;A0A338P6Q0	P47941;A0A338P675	Crk-like protein
Dctn1	20.7189	28	0	114.04	28.4557	33	E9Q586;D3YX34;E9Q3M3;O08788;D3Z2M9;D3YYG9	E9Q586;D3YX34;E9Q3M3;O08788	Dynactin subunit 1
Tmem205	20.7187	1	0	4.1311	23.7187	1	A0A1L1SSA8;Q91XE8	A0A1L1SSA8;Q91XE8	Transmembrane protein 205
Lxn	20.7183	3	0	9.5383	25.5487	3	P70202	P70202	Latexin
Mrpl23	20.7122	3	0	12.94	24.3903	3	O35972;A0A1B0GSZ9;A0A1B0GQZ1	O35972;A0A1B0GSZ9;A0A1B0GQZ1	39S ribosomal protein L23, mitochondrial
Galnt2	20.712	12	0	40.992	26.3542	13	Q6PB93;O08832	Q6PB93	Polypeptide N-acetylgalactosaminyltransferase 2;Polypeptide N-acetylgalactosaminyltransferase 2 soluble form
Emc4	20.7115	3	0	7.0063	24.171	2	Q9CZX9	Q9CZX9	ER membrane protein complex subunit 4
Nadk2	20.71	7	0	12.826	25.8442	7	A0A7P0A156;Q8C5H8;A0A7N9VS49;A0A7N9VT10;A0A7N9VSY3	A0A7P0A156;Q8C5H8;A0A7N9VS49	NAD kinase 2, mitochondrial
Creb1	20.7096	1	0	2.9376	22.7096	1	Q62347;A0A087WRI6;Q01147	Q62347;A0A087WRI6;Q01147	Cyclic AMP-responsive element-binding protein 1
Gipc1	20.7094	8	0	25.931	25.8048	9	Q9Z0G0;A0A1D5RML2;Q8R5M0	Q9Z0G0	PDZ domain-containing protein GIPC1
Nif3l1	20.7061	3	0	9.1882	24.954	2	Q9EQ80;E9PWJ6;D3Z0G0	Q9EQ80	NIF3-like protein 1
Upf1	20.7027	21	0	62.036	27.7801	22	Q9EPU0	Q9EPU0	Regulator of nonsense transcripts 1
Pla2g4a	20.7024	14	0	30.594	27.0653	16	P47713;Q9DBX5;A0A087WPN8	P47713;Q9DBX5	Cytosolic phospholipase A2;Phospholipase A2;Lysophospholipase
Ghitm	20.7002	3	0	4.1444	24.1595	3	Q91VC9;A0A286YDK2	Q91VC9;A0A286YDK2	Growth hormone-inducible transmembrane protein
Ugt1a7c	20.6939	8	0	34.686	26.3159	8	Q6ZQM8;D3YZE6;B2RT14;K9J7B2;E9PXN7;D3YZ96;D3Z748;Q63886;D3Z7G0;Q62452;Q64435;P70691;G3UZC9;D3YWN0;D3YUP6;Q91WH2;P17717;Q8K169;Q3UEP4;Q8VCN3;Q8BJL9	Q6ZQM8	UDP-glucuronosyltransferase 1-7C
Pafah1b2	20.6924	4	0	24.358	25.7511	5	Q61206;A0A1L1SVK0;A0A1L1SQ76;A0A1L1SRD0;A0A1L1SQV7;A0A1L1SSQ5	Q61206;A0A1L1SVK0;A0A1L1SQ76;A0A1L1SRD0;A0A1L1SQV7	Platelet-activating factor acetylhydrolase IB subunit beta
Nudcd2	20.6922	1	0.00029833	2.3561	23.2771	1	E0CYQ2;Q9CQ48	E0CYQ2;Q9CQ48	NudC domain-containing protein 2
Por	20.6912	16	0	57.219	27.3766	18	P37040;Q05DV1;E9Q997;E9PVT9	P37040;Q05DV1	NADPH--cytochrome P450 reductase
Ap2a1	20.691	13	0	36.488	26.7167	14	P17426;A0A140LIG7;A0A140LHA6	P17426	AP-2 complex subunit alpha-1
Copb1	20.6871	17	0	48.538	28.4962	22	Q9JIF7	Q9JIF7	Coatomer subunit beta
Mcat	20.6847	2	0	14.172	23.492	2	A0A2R8VHT7;Q8R3F5	A0A2R8VHT7;Q8R3F5	Malonyl-CoA-acyl carrier protein transacylase, mitochondrial
Aldh3b1	20.6841	7	0	18.194	25.5557	7	Q80VQ0;J3QMK6;E9Q3E1	Q80VQ0	Aldehyde dehydrogenase family 3 member B1
Bet1	20.6802	1	0.0014526	2.0229	22.2652	1	O35623	O35623	BET1 homolog
2210016F16Rik	20.676	5	0	17.716	25.3474	6	G3X8U3	G3X8U3
Slc25a37	20.6742	5	0	10.015	25.0488	4	Q920G8	Q920G8	Mitoferrin-1
Alas2	20.67	8	0	16.838	26.3406	7	A2AFM1;P08680	A2AFM1;P08680	5-aminolevulinate synthase;5-aminolevulinate synthase, erythroid-specific, mitochondrial
Tango2	20.6672	2	0.0025597	1.8038	23.4746	2	A0A338P6R4;A0A338P7G4;Q8BTN3;P54797;D3Z2V8;D6RH68;A0A338P6X6;Q99K56;A0A338P6B6	A0A338P6R4;A0A338P7G4;Q8BTN3;P54797;D3Z2V8;D6RH68;A0A338P6X6;Q99K56;A0A338P6B6	Transport and Golgi organization 2 homolog
Ubap2l	20.666	8	0	30.22	26.2943	9	Q80X50;A0A0H2UH17;A0A0G2JDV6;A0A0G2JFN7;A0A0G2JGD0;A0A0G2JG47	Q80X50;A0A0H2UH17;A0A0G2JDV6	Ubiquitin-associated protein 2-like
Prkcb	20.6599	6	0	15.852	26.0301	6	P68404	P68404	Protein kinase C beta type
Uros	20.6598	6	0	16.164	25.2638	7	P51163;Q3TPL3	P51163	Uroporphyrinogen-III synthase
Taok3	20.6583	13	0	72.865	27.0202	13	Q8BYC6;Q3V3K3;A0A0R4J1T3;Q5F2E8;F6RXB5;Q6ZQ29	Q8BYC6;Q3V3K3	Serine/threonine-protein kinase TAO3
Ipo4	20.6574	1	0.0005848	2.138	23.4648	1	D6RES6;Q5U4C5;Q8VI75	D6RES6;Q5U4C5;Q8VI75	Importin-4
Lsm7	20.6573	2	0	6.1223	23.4424	2	Q9CQQ8	Q9CQQ8	U6 snRNA-associated Sm-like protein LSm7
Prss2	20.6549	2	0	7.2444	25.4009	2	P07146	P07146	Anionic trypsin-2
Ptp4a2	20.6519	5	0	7.6969	24.7788	4	O70274;Q63739	O70274	Protein tyrosine phosphatase type IVA 2
Ppp1r12a	20.6503	15	0	54.827	27.7799	15	Q9DBR7;A0A1W2P750	Q9DBR7;A0A1W2P750	Protein phosphatase 1 regulatory subunit 12A
Flot1	20.6474	7	0	23.793	25.758	6	G3UYU4;O08917;G3UZZ5;G3UWW8;G3XA73	G3UYU4;O08917	Flotillin-1
Mcm4	20.6466	13	0	32.127	27.2154	14	P49717;A0A2R8VHP7;Q9CWV1	P49717	DNA replication licensing factor MCM4
Add2	20.6424	7	0	20.165	26.0877	8	Q9QYB8;A0A0N4SWF0	Q9QYB8	Beta-adducin
Exosc9	20.6423	2	0	3.9269	23.4496	2	A0A0G2JFV9;Q9JHI7	A0A0G2JFV9;Q9JHI7	Exosome complex component RRP45
Hp1bp3	20.6417	4	0	4.7462	24.7364	5	A2AM65;Z4YKA3;Z4YKB8;Q3TEA8;A2AM62;A2AM63	A2AM65;Z4YKA3;Z4YKB8;Q3TEA8	Heterochromatin protein 1-binding protein 3
Rheb	20.6415	2	0	4.5339	23.8115	2	Q921J2	Q921J2	GTP-binding protein Rheb
Iars2	20.6347	18	0	53.487	28.1287	22	Q8BIJ6;E9PWN2;E9PWN3	Q8BIJ6;E9PWN2	Isoleucine--tRNA ligase, mitochondrial
Ykt6	20.6311	5	0	32.899	25.0682	5	Q9CQW1	Q9CQW1	Synaptobrevin homolog YKT6
Acp1	20.6288	1	0.00058445	2.1267	23.6288	1	Q561M1;Q9D358	Q561M1;Q9D358	Low molecular weight phosphotyrosine protein phosphatase
Cd180	20.6253	11	0	32.687	27.1096	11	Q62192	Q62192	CD180 antigen
Acsl5	20.6252	14	0	32.801	26.9709	14	Q8JZR0;A0A286YD68;A0A286YCF3;A0A286YCG4	Q8JZR0	Long-chain-fatty-acid--CoA ligase 5
Vps28	20.6246	4	0	14.873	25.2904	5	Q9D1C8;A0A2R8VKS6	Q9D1C8;A0A2R8VKS6	Vacuolar protein sorting-associated protein 28 homolog
Sf3b2	20.6199	10	0	16.059	26.7561	9	Q3UJB0;A0A494B9S9	Q3UJB0
Cpt1a	20.6185	10	0	23.928	27.0336	10	P97742;A0A494BAD3;A0A494BAC7	P97742;A0A494BAD3	Carnitine O-palmitoyltransferase 1, liver isoform
Pdia5	20.6183	7	0	11.386	25.598	7	Q921X9	Q921X9	Protein disulfide-isomerase A5
Afg3l2	20.6169	11	0	25.627	26.5322	11	Q8JZQ2;Q920A7	Q8JZQ2	AFG3-like protein 2
Aldh1l1	20.6151	21	0	66.197	27.4422	20	Q8R0Y6;A0A0N4SW56;A0A0N4SVT2	Q8R0Y6;A0A0N4SW56	Cytosolic 10-formyltetrahydrofolate dehydrogenase
S100a13	20.6121	1	0	5.514	23.4194	1	A0A0A0MQ90;P97352	A0A0A0MQ90;P97352	Protein S100-A13
As3mt	20.6109	8	0	18.591	25.8975	10	Q91WU5;A0A494B985;A0A494B9D3	Q91WU5;A0A494B985	Arsenite methyltransferase
Ddx19a;Ddx19b	20.6098	5	0	20.922	25.8229	4	Q61655;Q8BZY3;Q8R3C7	Q61655;Q8BZY3;Q8R3C7	ATP-dependent RNA helicase DDX19A
Snapin	20.6084	3	0	4.3156	23.966	2	Q9Z266;V9GXI0	Q9Z266	SNARE-associated protein Snapin
Asns	20.6076	9	0	15.907	26.0537	9	Q61024;D3Z0C2;D3YYR0	Q61024	Asparagine synthetase [glutamine-hydrolyzing]
Arhgap18	20.6049	12	0	30.494	26.3706	11	Q8K0Q5;H3BJL1	Q8K0Q5	Rho GTPase-activating protein 18
Ltbp1	20.6042	23	0	138.84	28.549	30	Q8CG19;A0A3Q4EGK3;B1B1E2	Q8CG19;A0A3Q4EGK3;B1B1E2	Latent-transforming growth factor beta-binding protein 1
Ap3s1	20.599	3	0	3.2573	23.7689	3	Q9DCR2	Q9DCR2	AP-3 complex subunit sigma-1
Gm5571	20.5957	1	0	4.9684	22.9176	1	A0A140T8N0;P01639	A0A140T8N0;P01639	Ig kappa chain V-V region MOPC 41
Parp1	20.5955	19	0	61.171	27.8955	22	Q921K2;A0A0A6YVX0	Q921K2
Hrg	20.5953	3	0	8.9707	25.1962	3	Q9ESB3;A0A0R4J039;A0A338P6H8	Q9ESB3;A0A0R4J039;A0A338P6H8	Histidine-rich glycoprotein
Rab9a;Rab9	20.5946	4	0	8.3195	24.2116	4	Q9R0M6;A2AFP5;A2AFP4	Q9R0M6;A2AFP5	Ras-related protein Rab-9A
Stt3b	20.5917	7	0	22.85	26.6607	9	A0A0R4J0D3;Q3TDQ1	A0A0R4J0D3;Q3TDQ1	Dolichyl-diphosphooligosaccharide--protein glycosyltransferase subunit STT3B
Mpi	20.5911	7	0	20.174	25.3279	7	Q924M7;F6Q3K8	Q924M7	Mannose-6-phosphate isomerase
Snx12	20.5898	4	0	6.8778	24.4451	4	Q6ZWQ5;Q3TGS7;Q3V2H3;O70493	Q6ZWQ5;Q3TGS7;Q3V2H3;O70493	Sorting nexin-12
Nck2	20.5864	7	0	20.058	25.3733	7	O55033;A0A0J9YUK4;A0A087WQT7	O55033	Cytoplasmic protein NCK2
Kel	20.5837	3	0	7.5552	25.391	3	Q9EQF2;A0A0A6YXM8;A0A0A6YVT2	Q9EQF2	Kell blood group glycoprotein homolog
Paip1	20.5804	2	0	5.161	24.1654	2	D3Z3J6;G3UYE5;F6Y616;Q8VE62;G3UZ67	D3Z3J6;G3UYE5;F6Y616;Q8VE62;G3UZ67	Polyadenylate-binding protein-interacting protein 1
Ap3m1	20.5775	7	0	18.073	26.0745	7	Q9JKC8;A0A286YDZ6;H7BWY2;Q8R2R9;D3YWU3;D3YXV9	Q9JKC8;A0A286YDZ6;H7BWY2	AP-3 complex subunit mu-1
Lsm5	20.5775	1	0	3.2689	21.5775	1	A0A0N4SVK3;P62322	A0A0N4SVK3;P62322	U6 snRNA-associated Sm-like protein LSm5
Fgr	20.5741	10	0	27.948	26.1732	11	P14234	P14234	Tyrosine-protein kinase Fgr
Dctn4	20.5728	6	0	18.84	25.4667	7	Q8CBY8;Q3TRR2	Q8CBY8	Dynactin subunit 4
Cad	20.5722	38	0	121.54	28.3862	38	E9QAI5;B2RQC6;G3UWN2;E9QAT6;F6S3Z3	E9QAI5;B2RQC6;G3UWN2;E9QAT6	CAD protein;Glutamine-dependent carbamoyl-phosphate synthase;Aspartate carbamoyltransferase;Dihydroorotase
Atad1	20.5712	4	0	18.998	25.6687	5	A0A494BAB5;Q9D5T0;A0A494B9Y0;A0A494B9L7	A0A494BAB5;Q9D5T0;A0A494B9Y0	ATPase family AAA domain-containing protein 1
Stxbp3	20.5693	12	0	26.025	26.078	14	Q60770;A0A0G2JEI5;A2AEC9;A0A0G2JEQ3	Q60770	Syntaxin-binding protein 3
Try10	20.5668	1	0	5.0393	26.0145	2	Q792Z1	Q792Z1
Cln5	20.5666	3	0	6.7653	25.026	3	Q3UMW8	Q3UMW8	Ceroid-lipofuscinosis neuronal protein 5 homolog
Mrpl11	20.5657	2	0	4.5458	23.8876	1	A0A494B9R3;Q9CQF0;A0A494B915;A0A494B9H5	A0A494B9R3;Q9CQF0;A0A494B915;A0A494B9H5	39S ribosomal protein L11, mitochondrial
Hspa4l	20.5622	14	0	34.919	26.821	12	P48722;E0CY23;A0A0N4SVU2	P48722;E0CY23	Heat shock 70 kDa protein 4L
Hdac1	20.5607	6	0	36.96	26.0002	8	O09106	O09106	Histone deacetylase 1
Cpt2	20.5574	13	0	50.58	27.6735	17	P52825;A2A8E8;A2A8E7	P52825	Carnitine O-palmitoyltransferase 2, mitochondrial
Ap1s1	20.5525	1	0.00058394	2.1164	22.8745	1	D3Z268;D3Z0D6;D3YXN0;P61967	D3Z268;D3Z0D6;D3YXN0;P61967	AP-1 complex subunit sigma-1A
Drap1	20.5522	2	0	4.7852	23.5522	2	D3YYC2;F6T9K1;G3UXH5;D3YY09;Q9D6N5	D3YYC2;F6T9K1;G3UXH5;D3YY09;Q9D6N5	Dr1-associated corepressor
Fdps	20.55	7	0	22.343	26.4658	7	Q920E5;A0A0G2JEA5;A0A0G2JDJ5;A0A0G2JEB3;A0A0G2JE82	Q920E5;A0A0G2JEA5;A0A0G2JDJ5;A0A0G2JEB3	Farnesyl pyrophosphate synthase
Nubp1	20.5487	1	0	4.376	23.4725	2	A0A2R8W6X5;Q9R060	A0A2R8W6X5;Q9R060	Cytosolic Fe-S cluster assembly factor NUBP1
Erp27	20.5438	2	0	15.079	24.1204	3	Q9D8U3	Q9D8U3	Endoplasmic reticulum resident protein 27
Tppp3	20.5415	3	0	14.774	24.7861	3	Q9CRB6	Q9CRB6	Tubulin polymerization-promoting protein family member 3
Dhfr	20.5362	3	0	7.0162	24.1212	3	P00375	P00375	Dihydrofolate reductase
Nasp	20.5329	7	0	38.107	27.1297	10	B1AU76;B1AU75;Q99MD9	B1AU76;B1AU75;Q99MD9	Nuclear autoantigenic sperm protein
Myg1	20.5319	3	0	7.4692	25.1169	3	Q9JK81;F8WGG3;F7A3N3	Q9JK81;F8WGG3;F7A3N3	UPF0160 protein MYG1, mitochondrial
Akr1b7	20.5299	6	0	14.909	25.8318	6	P21300	P21300	Aldose reductase-related protein 1
Pddc1	20.5281	3	0	6.8572	24.4147	3	Q8BFQ8	Q8BFQ8	Parkinson disease 7 domain-containing protein 1
Arsb	20.5271	5	0	12.776	25.9145	5	A0A0R4J138;P50429	A0A0R4J138;P50429	Arylsulfatase B
Rprd1b	20.5266	5	0	20.303	24.6268	5	A0A0R4J195;Q9CSU0;F6YB25;F7DAY5	A0A0R4J195;Q9CSU0;F6YB25	Regulation of nuclear pre-mRNA domain-containing protein 1B
Rela	20.5254	8	0	23.303	26.1655	9	Q04207;A0A494BA44;Q4U113	Q04207;A0A494BA44	Transcription factor p65
Dock2	20.5242	27	0	71.746	27.9412	28	Q8C3J5;Q5SRI3;D6RGU3;Q3TMS1	Q8C3J5;Q5SRI3	Dedicator of cytokinesis protein 2
Ubxn1	20.5228	6	0	27.777	26.2261	9	Q922Y1;A0A498WFS2	Q922Y1;A0A498WFS2	UBX domain-containing protein 1
Samhd1	20.5195	1	0	5.6228	23.1045	1	E0CXZ5	E0CXZ5
Dnph1	20.5188	3	0	6.9552	23.8408	3	Q80VJ3	Q80VJ3	2-deoxynucleoside 5-phosphate N-hydrolase 1
Apeh	20.5166	14	0	57.761	27.2025	17	Q8R146;A0A0R4J107;A0A0A6YXV0	Q8R146;A0A0R4J107	Acylamino-acid-releasing enzyme
Mrps18a	20.5165	1	0	2.7516	23.5165	1	D3Z603;Q5U5I3;Q99N85	D3Z603;Q5U5I3;Q99N85	28S ribosomal protein S18a, mitochondrial
Mapk3	20.5163	7	0	14.626	25.7599	7	Q63844;A0A0U1RPX4;D3Z3G6;D3Z6D8;A0A0U1RPZ0	Q63844;A0A0U1RPX4;D3Z3G6	Mitogen-activated protein kinase 3;Mitogen-activated protein kinase
Crlf3	20.513	6	0	28.612	26.6998	7	Q9Z2L7;J3QMV5	Q9Z2L7	Cytokine receptor-like factor 3
Ubqln1	20.5129	2	0.002559	1.8038	24.3202	1	Q8R317	Q8R317	Ubiquilin-1
Pmpcb	20.5085	9	0	36.52	26.177	11	Q9CXT8	Q9CXT8	Mitochondrial-processing peptidase subunit beta
Sgta	20.5078	2	0	3.4055	24.1828	2	A0A1W2P7I5;A0A1W2P6P1;Q8BJU0	A0A1W2P7I5;A0A1W2P6P1;Q8BJU0	Small glutamine-rich tetratricopeptide repeat-containing protein alpha
Lrrfip2	20.5053	1	0	8.1241	23.6752	1	A0A0G2JDR6;A0A0R4J169;E9QN52;A0A0G2JEP4;A0A0G2JFV5;A0A1L1SSC0;A0A668KLE1;Q91WK0	A0A0G2JDR6;A0A0R4J169;E9QN52;A0A0G2JEP4;A0A0G2JFV5;A0A1L1SSC0;A0A668KLE1;Q91WK0	Leucine-rich repeat flightless-interacting protein 2
Arhgap17	20.5023	11	0	45.434	27.0411	15	Q3UIA2;E9QAJ9;A0A0U1RNM6	Q3UIA2;E9QAJ9;A0A0U1RNM6	Rho GTPase-activating protein 17
Serpinb9b;Serpinb9c	20.5016	1	0.00030562	2.6217	24.8939	2	Q9DAV6;Q9D6A7;I7HJI5	Q9DAV6;Q9D6A7;I7HJI5
Eps15	20.5008	17	0	67.181	26.8254	19	H3BK65;P42567;Q5JC28;F6W2Q5;A0A0R4J0A0;H3BJB8;H3BLE4	H3BK65;P42567;Q5JC28;F6W2Q5;A0A0R4J0A0	Epidermal growth factor receptor substrate 15
Myo1f	20.4954	15	0	39.396	26.9669	17	Q8CG29;P70248;G3V011;G3UZR3	Q8CG29;P70248;G3V011	Unconventional myosin-If
Gm3550;Rpl29	20.4928	1	0.0033717	1.6827	21.4928	1	A0A1L1SUN1;A0A1L1SS27;W4VSN7;P47915	A0A1L1SUN1;A0A1L1SS27;W4VSN7;P47915	60S ribosomal protein L29
Psip1	20.4817	5	0	9.2564	25.7892	5	Q99JF8;A2BI12;F6RB63	Q99JF8;A2BI12	PC4 and SFRS1-interacting protein
Szrd1	20.477	1	0	3.3888	23.477	1	A2AA85;Q6NXN1	A2AA85;Q6NXN1	SUZ domain-containing protein 1
Copg1	20.4681	16	0	62.738	27.4939	17	Q9QZE5;Q7TNQ1	Q9QZE5	Coatomer subunit gamma-1
Wdr5	20.4676	1	0	3.3391	24.4677	1	P61965	P61965	WD repeat-containing protein 5
Lin7c;Lin7a;Lin7b	20.4661	2	0	6.0118	23.9256	2	O88952;Q3TUM0;O88951;Q8JZS0	O88952;Q3TUM0;O88951;Q8JZS0	Protein lin-7 homolog C;Protein lin-7 homolog B;Protein lin-7 homolog A
Npc1	20.4613	5	0	11.933	25.5935	6	O35604	O35604	Niemann-Pick C1 protein
	20.4611	1	0	8.9092	22.7831	1	Q9CZL2	Q9CZL2	Uncharacterized protein C4orf32 homolog
Slc15a4	20.4604	5	0	9.5544	25.9206	5	Q91W98;D6RDC2;F6QFB4;D3Z4X0;A0A0G2JDS1	Q91W98;D6RDC2	Solute carrier family 15 member 4
Rabgap1l;Rabgap1	20.4598	1	0	4.2252	23.6297	1	A0A3Q4L343;A0A0A6YWT4;A0A0A6YY35;A2AWA9	A0A3Q4L343;A0A0A6YWT4;A0A0A6YY35;A2AWA9	Rab GTPase-activating protein 1
Bpgm	20.4586	3	0	7.9276	24.1591	3	P15327;D3Z223	P15327;D3Z223	Bisphosphoglycerate mutase;Phosphoglycerate mutase
Fam109b	20.4561	2	0	6.1598	24.2635	2	A0A0R4J1Z2;Q14B98	A0A0R4J1Z2;Q14B98	Sesquipedalian-2
Fasn	20.4538	45	0	124.45	28.7904	52	P19096;A0A0U1RNJ1;A0A0U1RPP5	P19096;A0A0U1RNJ1	Fatty acid synthase;[Acyl-carrier-protein] S-acetyltransferase;[Acyl-carrier-protein] S-malonyltransferase;3-oxoacyl-[acyl-carrier-protein] synthase;3-oxoacyl-[acyl-carrier-protein] reductase;3-hydroxyacyl-[acyl-carrier-protein] dehydratase;Enoyl-[acyl-carrier-protein] reductase;Oleoyl-[acyl-carrier-protein] hydrolase
S100a9	20.4528	1	0.0017301	1.9611	23.2601	1	P31725	P31725	Protein S100-A9
Usp14	20.4527	12	0	44.884	27.2548	13	E9PYI8;Q9JMA1	E9PYI8;Q9JMA1	Ubiquitin carboxyl-terminal hydrolase;Ubiquitin carboxyl-terminal hydrolase 14
Asph	20.4508	9	0	23.422	25.8228	9	Q8CBM2;A2AL85;Q8BSY0	Q8CBM2;A2AL85;Q8BSY0	Aspartyl/asparaginyl beta-hydroxylase
Bnip1	20.4495	2	0	3.0688	24.2568	2	Q6QD59;F6WZQ6;F7C279;B8JJI4	Q6QD59;F6WZQ6;F7C279;B8JJI4	Vesicle transport protein SEC20
Stat3	20.448	16	0	81.882	27.2225	17	P42227;B7ZC18	P42227;B7ZC18	Signal transducer and activator of transcription 3;Signal transducer and activator of transcription
Gspt1	20.4478	11	0	37.102	27.3423	11	Q8R050;Q149F3;F7CE88	Q8R050	Eukaryotic peptide chain release factor GTP-binding subunit ERF3A
Uba5	20.4473	4	0	17.376	24.7242	4	Q8VE47;F6VRI6;D6RH76;A0A1L1SSH6	Q8VE47;F6VRI6;D6RH76	Ubiquitin-like modifier-activating enzyme 5
Pggt1b	20.4393	1	0.00058599	2.1544	23.2466	1	A0A498WFM6;A0A494BB85;A0A494BA07;Q8BUY9	A0A498WFM6;A0A494BB85;A0A494BA07;Q8BUY9	Geranylgeranyl transferase type-1 subunit beta
Ap1g1	20.4384	8	0	13.963	25.681	10	Q8CBB7;P22892	Q8CBB7;P22892	AP-1 complex subunit gamma-1
Emd	20.4358	7	0	23.338	26.1174	9	O08579;I7HJS1;Q3THM8;B7FAU5;D6RFS0	O08579;I7HJS1;Q3THM8;B7FAU5	Emerin
Pdlim4	20.4326	1	0.0025605	1.8117	23.0175	1	A8Y5C3;Q5SWV3;P70271	A8Y5C3;Q5SWV3;P70271	PDZ and LIM domain protein 4
Pnlip	20.4304	5	0	18.842	26.7961	5	Q6P8U6;A0A494B914	Q6P8U6	Pancreatic triacylglycerol lipase
Eci2	20.43	6	0	24.885	25.8659	6	Q3TCD4;Q9WUR2;E9Q7A8;E9PYC6;E9Q858;E9PUY9;E9PYA9;E9PVM6;E9PY42;Q78JN3	Q3TCD4;Q9WUR2;E9Q7A8;E9PYC6;E9Q858;E9PUY9;E9PYA9;E9PVM6	Enoyl-CoA delta isomerase 2, mitochondrial
Pcyox1	20.4273	10	0	24.696	26.9079	12	Q9CQF9;F7CIP8;A0A0N4SWD3;D3Z275	Q9CQF9;F7CIP8	Prenylcysteine oxidase
Dnajc11	20.4271	7	0	27.098	25.4675	8	Q5U458;E9Q8B3;A2A8D1	Q5U458;E9Q8B3	DnaJ homolog subfamily C member 11
Aip	20.4259	5	0	11.723	25.5046	5	O08915;D3YW40	O08915;D3YW40	AH receptor-interacting protein
Stk10	20.4202	8	0	25.506	26.6517	8	O55098	O55098	Serine/threonine-protein kinase 10
Fbl	20.4194	9	0	31.762	27.7394	10	P35550;A0A140LIR6	P35550	rRNA 2-O-methyltransferase fibrillarin
Atg3	20.4173	4	0	9.066	24.3108	4	Q9CPX6	Q9CPX6	Ubiquitin-like-conjugating enzyme ATG3
Tbl1xr1	20.413	1	0	4.8244	22.7349	1	A0A0J9YUE3;A0A0J9YV90;Q8BHJ5	A0A0J9YUE3;A0A0J9YV90;Q8BHJ5	F-box-like/WD repeat-containing protein TBL1XR1
Qars	20.4125	18	0	60.277	27.4311	20	Q8BML9;D3Z158;A0A140LHZ5;A0A140LIS6;A0A140LHJ3;A0A0A6YY08;A0A140LIN2;A0A140LJK5;A0A140LJH2;A0A140LID3;A0A140LHB3;F6TDS3;A0A140LII8;A0A140LIR0;A0A140LJH1;A0A140LHC3;A0A140LIZ4	Q8BML9;D3Z158
Rrm2	20.408	5	0	22.542	25.4025	5	P11157;D3Z0D8;F6RUC3	P11157	Ribonucleoside-diphosphate reductase subunit M2
Rab11a	20.4077	1	0	15.709	24.2151	1	P62492;E9Q6B3;E9PZB2	P62492	Ras-related protein Rab-11A
Ap3b1	20.4075	11	0	27.279	26.4623	11	Q9Z1T1;A0A338P6V5;A0A571BEW4;A0A571BES1;Q9JME5	Q9Z1T1	AP-3 complex subunit beta-1
Gpr56	20.4018	2	0	4.1815	25.8262	2	A0A1D5RLN4;A0A1D5RLE2;Q8K209;A0A1D5RME3;A0A1D5RLH8;A0A1D5RM68;A0A1D5RLF7;A0A1D5RLB9;A0A1D5RLK9	A0A1D5RLN4;A0A1D5RLE2;Q8K209;A0A1D5RME3;A0A1D5RLH8;A0A1D5RM68;A0A1D5RLF7;A0A1D5RLB9;A0A1D5RLK9	G-protein coupled receptor 56;GPR56 N-terminal fragment;GPR56 C-terminal fragment
Gm20498;Synj2bp	20.3986	2	0.0003059	2.6358	23.9836	1	E9PVN6;Q9D6K5	E9PVN6;Q9D6K5	Synaptojanin-2-binding protein
Opa1	20.3985	18	0	44.252	27.5817	21	H7BX01;P58281;E0CXD1;F6U775	H7BX01;P58281;E0CXD1	Dynamin-like 120 kDa protein, mitochondrial;Dynamin-like 120 kDa protein, form S1
Ptprj	20.3909	17	0	32.774	27.4957	16	A2AWF8;A2AWF9;E9Q4S7;Q64455	A2AWF8;A2AWF9;E9Q4S7;Q64455	Protein-tyrosine-phosphatase;Receptor-type tyrosine-protein phosphatase eta
Wdr77	20.3887	6	0	15.029	25.7185	7	Q99J09;F7D5L2	Q99J09;F7D5L2	Methylosome protein 50
Nme3	20.3884	4	0	5.1336	24.6332	3	Q9WV85	Q9WV85	Nucleoside diphosphate kinase 3
Hmga1	20.3883	2	0	13.619	24.2487	2	P17095;Q3TE85;A0A338P6E8;A0A338P6F6	P17095;Q3TE85;A0A338P6E8;A0A338P6F6	High mobility group protein HMG-I/HMG-Y
Chordc1	20.3872	8	0	27.436	27.0182	10	Q9D1P4;A0A1L1SU22;A0A1L1STZ1;A0A1L1STQ1;A0A1L1SSG7	Q9D1P4;A0A1L1SU22;A0A1L1STZ1	Cysteine and histidine-rich domain-containing protein 1
Cav1;Cav3	20.3868	2	0	4.5045	23.3868	2	D3Z148;P49817;D3Z0J2;H3BKG0;P51637	D3Z148;P49817;D3Z0J2;H3BKG0;P51637	Caveolin;Caveolin-1;Caveolin-3
Stx6	20.3864	1	0	4.4543	23.7083	1	A0A0A6YXG0;Q9JKK1	A0A0A6YXG0;Q9JKK1	Syntaxin-6
Iscu	20.3832	1	0	4.2856	23.1905	1	D3Z0K9;D3Z7W0;Q9D7P6	D3Z0K9;D3Z7W0;Q9D7P6	Iron-sulfur cluster assembly enzyme ISCU, mitochondrial
Gm11744	20.383	1	0.0058252	1.5617	23.1904	1	J3QJU7	J3QJU7
Diablo	20.3827	1	0.00029967	2.4253	23.19	1	A0A0G2JGS0;Q8R1D8;D3Z3K5;D3Z2Q3;Q9JIQ3	A0A0G2JGS0;Q8R1D8;D3Z3K5;D3Z2Q3;Q9JIQ3	Diablo homolog, mitochondrial
Dlgap4	20.3814	8	0	27.862	27.3516	8	B7ZNS2;B1AZP2;I1E4X0;F6YMR0;E9PUF2;H3BJD4;H3BJW9;H3BKJ0	B7ZNS2;B1AZP2;I1E4X0;F6YMR0;E9PUF2;H3BJD4	Disks large-associated protein 4
Sf3b4	20.3795	2	0	12.911	25.1418	3	Q8QZY9	Q8QZY9	Splicing factor 3B subunit 4
Coq9	20.3741	2	0	19.719	24.0084	3	F6SFF5;Q8K1Z0	F6SFF5;Q8K1Z0	Ubiquinone biosynthesis protein COQ9, mitochondrial
Hgsnat	20.3736	2	0	8.3671	25.5611	3	Q3UDW8	Q3UDW8	Heparan-alpha-glucosaminide N-acetyltransferase
Gsk3b	20.3728	4	0	12.063	24.9578	4	E9QAQ5;Q9WV60	E9QAQ5;Q9WV60	Glycogen synthase kinase-3 beta
Bloc1s2	20.3719	1	0.00030367	2.5528	22.6938	1	A0A494BAG7;Q9CWG9	A0A494BAG7;Q9CWG9	Biogenesis of lysosome-related organelles complex 1 subunit 2
Glul	20.3715	6	0	27.598	26.3018	6	P15105;D3YVK1	P15105	Glutamine synthetase
Ppp5c	20.3712	6	0	20.806	25.7613	6	F7BX26;Q60676	F7BX26;Q60676	Serine/threonine-protein phosphatase;Serine/threonine-protein phosphatase 5
Abhd16a	20.3706	8	0	17.006	25.9039	8	Q9Z1Q2;G3UX11;Q80YU0	Q9Z1Q2	Abhydrolase domain-containing protein 16A
Smarca5	20.3698	15	0	41.49	27.0719	14	Q91ZW3;Q6PGB8;F6Z6F4	Q91ZW3	SWI/SNF-related matrix-associated actin-dependent regulator of chromatin subfamily A member 5
Dok1	20.3675	6	0	17.3	25.8007	6	P97465	P97465	Docking protein 1
Asrgl1	20.3646	2	0	5.174	24.3647	2	Q8C0M9	Q8C0M9	Isoaspartyl peptidase/L-asparaginase;Isoaspartyl peptidase/L-asparaginase alpha chain;Isoaspartyl peptidase/L-asparaginase beta chain
Ptk2b	20.3587	15	0	51.211	27.5611	15	E9Q2A6;Q3UDE9;Q9QVP9;F7CCX1	E9Q2A6;Q3UDE9;Q9QVP9;F7CCX1	Protein-tyrosine kinase 2-beta
Gmppa	20.3576	5	0	13.681	24.992	4	Q922H4;A0A087WPV7;D3Z2L8;D3YVK2;D3Z2T0;D3Z5Z5;D3Z0T7	Q922H4	Mannose-1-phosphate guanyltransferase alpha
Slc29a3	20.3556	2	0	20.653	24.7468	2	D6RI95;D3YWS9;Q99P65	D6RI95;D3YWS9;Q99P65	Equilibrative nucleoside transporter 3
2005-03-01	20.3484	2	0	4.2264	24.1558	2	Q3KNM2;A0A0R4J1H0;F6W8T3	Q3KNM2;A0A0R4J1H0;F6W8T3	E3 ubiquitin-protein ligase MARCH5
Naglu	20.346	11	0	41.727	25.786	12	O88325	O88325
Mrps23	20.3458	2	0	4.8714	23.3458	2	F7ARZ1;A7M7Q8;Q3TI14;Q8VE22;Q5SXC9	F7ARZ1;A7M7Q8;Q3TI14;Q8VE22;Q5SXC9	28S ribosomal protein S23, mitochondrial
Ergic1	20.3444	4	0	11.737	25.2872	4	F6SLP4;A0A494BAW5;A0A494BAK4;Q9DC16;A0A494BAX4	F6SLP4;A0A494BAW5;A0A494BAK4;Q9DC16;A0A494BAX4	Endoplasmic reticulum-Golgi intermediate compartment protein 1
Supt16;Supt16h	20.3444	8	0	33.311	26.3138	8	G3X956;Q920B9	G3X956;Q920B9	FACT complex subunit SPT16
Bzrap1	20.3428	2	0.0025554	1.7914	26.769	2	Q7TNF8;Q5NCP6	Q7TNF8;Q5NCP6	Peripheral-type benzodiazepine receptor-associated protein 1
Tmem33	20.3425	2	0	5.8824	23.8018	2	Q9CR67;A0A0R4J1Z3;Q9CZM3	Q9CR67;A0A0R4J1Z3;Q9CZM3	Transmembrane protein 33
Aimp2	20.3416	6	0	28.577	26.3907	8	Q8R010;Q8R3V2	Q8R010;Q8R3V2	Aminoacyl tRNA synthase complex-interacting multifunctional protein 2
Rtn3	20.3396	2	0	18.884	27.7062	5	Q9ES97	Q9ES97	Reticulon-3
Mpc1	20.3333	3	0	7.4532	23.752	3	P63030;D3YWY6;D3Z5S0;E9Q0V4;D3Z786	P63030;D3YWY6;D3Z5S0;E9Q0V4	Mitochondrial pyruvate carrier 1
Kpna6	20.333	5	0	12.806	24.8567	5	Q4FJZ2;O35345	Q4FJZ2;O35345	Importin subunit alpha;Importin subunit alpha-7
Eif4g1	20.3316	22	0	96.885	28.5347	28	E9PVC6;E9Q9E1;E9PVC5;Q6NZJ6;A0A0J9YUS5;A0A0J9YVC1;A0A0J9YUC1;E9Q770;A2AMI7;A0A0J9YU44;A0A0J9YUL1;A0A0J9YTV0;D3YWY7;D3YWM1;D3Z439	E9PVC6;E9Q9E1;E9PVC5;Q6NZJ6;A0A0J9YUS5;A0A0J9YVC1;A0A0J9YUC1;E9Q770	Eukaryotic translation initiation factor 4 gamma 1
Zdbf2	20.3292	1	0.0076881	1.4345	22.3292	1	B1AU71;A0A6I8MWW6;Q5SS00	B1AU71;A0A6I8MWW6;Q5SS00	DBF4-type zinc finger-containing protein 2 homolog
Uqcc2	20.3275	1	0.00030294	2.5271	22.3275	1	D3Z4D6;D3Z4C9;Q9CQY6	D3Z4D6;D3Z4C9;Q9CQY6	Ubiquinol-cytochrome-c reductase complex assembly factor 2
Dnaja3	20.322	4	0	9.2796	25.0922	4	Q99M87	Q99M87	DnaJ homolog subfamily A member 3, mitochondrial
Dctn6	20.3219	1	0	3.1106	23.1293	1	D3Z6H3;D3Z4E5;Q9WUB4	D3Z6H3;D3Z4E5;Q9WUB4	Dynactin subunit 6
Phf5a	20.3195	1	0	4.9118	23.3195	1	P83870	P83870	PHD finger-like domain-containing protein 5A
Kiaa1598	20.3174	8	0	26.234	26.2277	8	Q8K2Q9	Q8K2Q9	Shootin-1
Mccc2	20.3147	10	0	22.925	26.2383	9	Q3ULD5;Q6PD20	Q3ULD5;Q6PD20	Methylcrotonoyl-CoA carboxylase beta chain, mitochondrial
Cpsf3	20.3125	1	0	3.963	21.3125	1	A0A1Y7VNI9;A0A1Y7VLY3;Q9QXK7	A0A1Y7VNI9;A0A1Y7VLY3;Q9QXK7	Cleavage and polyadenylation specificity factor subunit 3
Arl3	20.3123	4	0	12.783	24.9635	4	A0A494BAJ6;Q9WUL7	A0A494BAJ6;Q9WUL7	ADP-ribosylation factor-like protein 3
Ptrhd1	20.3117	2	0.0025648	1.8292	24.2019	1	D3Z4S3	D3Z4S3	Putative peptidyl-tRNA hydrolase PTRHD1
Lsm4	20.3072	1	0.00257	1.8445	22.8921	1	D3YTP8;A0A1B0GQZ9;A0A1B0GRR9;Q9CY46;Q9QXA5	D3YTP8;A0A1B0GQZ9;A0A1B0GRR9;Q9CY46;Q9QXA5	U6 snRNA-associated Sm-like protein LSm4
Rmdn3	20.3036	3	0	10.503	24.8886	2	Q3UJU9	Q3UJU9	Regulator of microtubule dynamics protein 3
Stat5a	20.3023	9	0	24.082	26.4387	9	P42230;B2C3G8;A2A5D3	P42230;B2C3G8	Signal transducer and activator of transcription 5A;Signal transducer and activator of transcription
Nup50	20.302	4	0	10.432	25.0024	4	Q9JIH2	Q9JIH2	Nuclear pore complex protein Nup50
Cops7b	20.3015	2	0	6.0908	23.7609	2	Q8BV13;D6RH36;D6RI85	Q8BV13;D6RH36;D6RI85	COP9 signalosome complex subunit 7b
Abhd12	20.3001	6	0	16.062	25.7307	6	Q99LR1;D6RFU2;F7BHM8	Q99LR1;D6RFU2	Monoacylglycerol lipase ABHD12
Mthfd2	20.2996	4	0	7.727	25.6563	5	P18155	P18155	Bifunctional methylenetetrahydrofolate dehydrogenase/cyclohydrolase, mitochondrial;NAD-dependent methylenetetrahydrofolate dehydrogenase;Methenyltetrahydrofolate cyclohydrolase
Parvg	20.2992	4	0	16.211	25.1739	4	E9PYG5;Q9ERD8;A6PW97;A0A2I3BS32	E9PYG5;Q9ERD8;A6PW97	Gamma-parvin
Gbp2	20.2982	6	0	16.923	25.7781	7	Q9Z0E6;E9Q2N7;Q01514	Q9Z0E6	Interferon-induced guanylate-binding protein 2
Tsg101	20.2979	8	0	20.552	25.4215	8	Q61187;A0A1B0GS09;A0A1B0GRX2;A0A1B0GS10;D3Z0S9;D3Z2V5	Q61187;A0A1B0GS09	Tumor susceptibility gene 101 protein
Rbm39	20.2949	3	0	6.1568	24.2018	3	F7AA45;E9Q8F0;Q8VH51;B7ZD61;B7ZD63	F7AA45;E9Q8F0;Q8VH51;B7ZD61	RNA-binding protein 39
Dync1li2	20.2942	4	0	31.652	25.9469	4	Q6PDL0;A0A1D5RMC1;A0A1D5RM94	Q6PDL0;A0A1D5RMC1;A0A1D5RM94	Cytoplasmic dynein 1 light intermediate chain 2
Dguok	20.2941	6	0	27.334	25.8705	6	Q9QX60;Q504N4;A0A0U1RPX3	Q9QX60;Q504N4;A0A0U1RPX3	Deoxyguanosine kinase, mitochondrial
Iigp1	20.2931	2	0	3.5449	24.8167	2	Q9QZ85	Q9QZ85	Interferon-inducible GTPase 1
Tnpo1	20.2926	12	0	34.654	26.5714	12	Q8BFY9;Q3TKD0;J3QMX2	Q8BFY9;Q3TKD0;J3QMX2	Transportin-1
Cel	20.292	7	0	16.595	26.0182	8	Q64285	Q64285	Bile salt-activated lipase
Ctbp1	20.2893	7	0	18.403	25.6353	9	A0A0J9YU62;O88712;A0A0J9YUM4;A0A0J9YUR5;A0A0J9YVI3;A0A0J9YTW3;A0A0J9YU66;E9Q0T4;E9PWQ9;Q91YZ2;P56546;A0A0J9YVC3	A0A0J9YU62;O88712;A0A0J9YUM4;A0A0J9YUR5	C-terminal-binding protein 1
Mtdh	20.2875	7	0	17.521	26.5521	6	Q80WJ7;E9PUX0;F6QHD1;F6ZQL0;F6QFT1;F6ZSG0	Q80WJ7;E9PUX0	Protein LYRIC
Gata1	20.2864	1	0.0014531	2.0353	23.2864	1	P17679	P17679	Erythroid transcription factor
Ppih	20.2806	1	0	3.1617	23.2807	1	A2BGI9;A2BGI8;Q9D868	A2BGI9;A2BGI8;Q9D868	Peptidyl-prolyl cis-trans isomerase;Peptidyl-prolyl cis-trans isomerase H
Kcnk6	20.278	3	0	24.71	25.1691	5	Q3TBV4	Q3TBV4
Pmpca	20.2679	10	0	22.269	27.2665	11	Q9DC61;A2AIW9	Q9DC61;A2AIW9	Mitochondrial-processing peptidase subunit alpha
Crk	20.2661	7	0	28.127	26.0049	8	Q64010;Q8JZR2;Q5ND50;F7D232;Q3TQV3	Q64010;Q8JZR2;Q5ND50;F7D232	Adapter molecule crk
Rdx	20.2645	8	0	23.03	25.761	13	P26043;A0A5F8MPB9;Q7TSG6	P26043;A0A5F8MPB9;Q7TSG6	Radixin
Gnl3	20.261	3	0	5.0401	25.261	2	Q8CI11;A0A2I3BR82;A0A2I3BRV9;A0A2I3BPZ6;A0A2I3BR32	Q8CI11	Guanine nucleotide-binding protein-like 3
Letm1	20.2586	12	0	59.338	27.2292	15	Q9Z2I0	Q9Z2I0	LETM1 and EF-hand domain-containing protein 1, mitochondrial
Rsad2	20.2543	6	0	19.436	25.4833	6	Q8CBB9;D6RJ49	Q8CBB9;D6RJ49	Radical S-adenosyl methionine domain-containing protein 2
Gucy1a3	20.2525	17	0	38.459	26.8045	16	Q9ERL9;A0A0A6YWB4	Q9ERL9	Guanylate cyclase soluble subunit alpha-3
Idh3g	20.2477	7	0	44.645	27.1853	9	P70404	P70404	Isocitrate dehydrogenase [NAD] subunit gamma 1, mitochondrial
	20.2474	2	0	7.717	24.8687	1	A0A3B2W864;A0A338P6L9;B2KF67;A0A338P6T6	A0A3B2W864
Irak1;Nek2	20.247	1	0.0090041	1.3814	23.417	1	F6TQF4;F6THK7;B1AUW8;B1AUW9;Q8BR10;B1AUW6;O35942;Q62406	F6TQF4;F6THK7;B1AUW8;B1AUW9;Q8BR10;B1AUW6;O35942;Q62406	Serine/threonine-protein kinase Nek2;Interleukin-1 receptor-associated kinase 1
Arhgap6	20.2452	2	0	5.6088	24.0525	1	A2ALX6;A2ALX7;G3UZI7;O54834	A2ALX6;A2ALX7;G3UZI7;O54834	Rho GTPase-activating protein 6
Ubfd1	20.244	2	0	4.705	23.8289	2	Q78JW9;A0A0U1RQ55	Q78JW9;A0A0U1RQ55	Ubiquitin domain-containing protein UBFD1
Xpo1	20.2416	12	0	32.602	27.1553	17	Q6P5F9;A2AKT6;F6YA11	Q6P5F9	Exportin-1
Map2k1	20.2389	5	0	25.307	25.9902	4	P31938	P31938	Dual specificity mitogen-activated protein kinase kinase 1
Nop56	20.2389	8	0	22.039	25.9024	8	Q9D6Z1;F7CHQ7;F7CHP9;E0CXZ0;A2APD7;F6USW7	Q9D6Z1;F7CHQ7	Nucleolar protein 56
Ndufc2	20.2382	1	0	2.8234	24.8999	2	Q9CQ54	Q9CQ54	NADH dehydrogenase [ubiquinone] 1 subunit C2
Prcp	20.2368	9	0	24.739	26.7792	12	Q7TMR0;A0A140LHY2	Q7TMR0;A0A140LHY2	Lysosomal Pro-X carboxypeptidase
Zmpste24	20.2358	8	0	25.183	25.8583	11	Q80W54;I7HIP5	Q80W54	CAAX prenyl protease 1 homolog
Nras	20.2343	2	0	5.5692	23.2343	2	A0A0G2JE25;A0A0G2JGP4;Q9D091;P08556	A0A0G2JE25;A0A0G2JGP4;Q9D091;P08556	GTPase NRas
Cap2	20.233	4	0	13.43	24.9879	4	Q9CYT6;D3YTR7;A0A286YCS6	Q9CYT6;D3YTR7;A0A286YCS6	Adenylyl cyclase-associated protein 2;Adenylyl cyclase-associated protein
Ncstn	20.2307	7	0	25.024	25.9644	6	P57716	P57716	Nicastrin
Ighv10-1;Ighv10-3	20.2291	1	0.0058204	1.5533	22.814	1	A0A0B4J1J6;A0A075B5T6	A0A0B4J1J6;A0A075B5T6
Ubqln2	20.2286	4	0	20.742	24.0359	4	Q9QZM0	Q9QZM0	Ubiquilin-2
Dtymk	20.2239	4	0	6.7751	24.9734	4	P97930;D3Z3R3	P97930;D3Z3R3	Thymidylate kinase
Kpna4	20.2226	2	0	16.653	25.4876	2	A0A0B4J1E7;O35343	A0A0B4J1E7;O35343	Importin subunit alpha-3
Igkv12-98	20.2215	1	0	4.147	22.8772	2	A0A075B5K9;A0A0G2JGF9	A0A075B5K9;A0A0G2JGF9
Ppp2r5d	20.2209	6	0	10.72	25.4714	6	Q91V89;Q7TNL5;A0A1Y7VIR0;Q6PD28	Q91V89;Q7TNL5
Mob4	20.2176	5	0	12.345	24.9793	7	Q6PEB6;G8JL35;E0CXA9;E0CYJ0	Q6PEB6;G8JL35;E0CXA9;E0CYJ0	MOB-like protein phocein
Sdhc	20.2176	4	0	9.6294	25.8879	4	Q9CZB0;D3Z1A8;F8WGB3	Q9CZB0;D3Z1A8;F8WGB3	Succinate dehydrogenase cytochrome b560 subunit, mitochondrial
Ndufb11	20.2169	5	0	15.155	25.7803	6	O09111	O09111	NADH dehydrogenase [ubiquinone] 1 beta subcomplex subunit 11, mitochondrial
Srp54;Srp54c	20.2145	6	0	18.447	25.498	6	P14576;E9PXC0	P14576;E9PXC0	Signal recognition particle 54 kDa protein
Tbcb	20.2137	3	0	8.1052	25.205	3	Q9D1E6	Q9D1E6	Tubulin-folding cofactor B
Mtnd5	20.2125	3	0	7.6999	24.5401	4	P03921	P03921	NADH-ubiquinone oxidoreductase chain 5
Carkd	20.2119	9	0	35.292	26.1887	12	J3QMM7;K3W4M4;Q9CZ42;J3QN06;J3QPU6	J3QMM7;K3W4M4;Q9CZ42;J3QN06	ATP-dependent (S)-NAD(P)H-hydrate dehydratase
Ada	20.2101	5	0	18.135	25.8865	5	P03958	P03958	Adenosine deaminase
Mark2	20.2086	3	0	7.2417	25.7996	4	Q05512;E9Q9N6;E9QMP6;F6ZS70;A0A0R4J0B1;A0A0R4J227;E9PYX3;E9Q8H5;Q3T9A3;E9Q2G8;E9PZ55;F6ZEX4;F6UY70;F7A3Q3;E9Q2J6;F7CRG8;F7CVZ7	Q05512;E9Q9N6;E9QMP6;F6ZS70;A0A0R4J0B1;A0A0R4J227;E9PYX3;E9Q8H5;Q3T9A3;E9Q2G8	Serine/threonine-protein kinase MARK2
Nt5c2	20.2078	11	0	30.351	26.9987	12	A0A494B9X3;E9Q9M1;Q3V1L4;A0A494BBP6;G3X9J6;A0A494BBI8;A0A494BBK9;A0A494BAU4;A0A494BAN2;A0A494BBM7	A0A494B9X3;E9Q9M1;Q3V1L4;A0A494BBP6	Cytosolic purine 5-nucleotidase
Fam162a	20.2072	4	0	7.982	25.8634	6	Q9D6U8;A0A338P6X2	Q9D6U8	Protein FAM162A
Amdhd2	20.2042	4	0	12.511	25.0695	4	F6UP77;F7CUP3;Q8JZV7	F6UP77;F7CUP3;Q8JZV7	Putative N-acetylglucosamine-6-phosphate deacetylase
	20.2023	1	0	6.8459	23.3721	2	A0A1W2P6G5	A0A1W2P6G5
Hmox2	20.2014	6	0	33.863	26.9503	10	O70252;D3YX62;D3Z4A2;D3YXN4	O70252;D3YX62	Heme oxygenase 2
Bcas2	20.1996	2	0	5.7831	23.9	2	Q9D287;D6RGA5	Q9D287;D6RGA5	Pre-mRNA-splicing factor SPF27
Mtx2	20.1987	7	0	37.43	26.6517	8	O88441	O88441	Metaxin-2
Far1	20.1969	1	0.00030257	2.5165	21.1969	1	D3Z072;D3Z5W6;D3Z4N9;Q922J9	D3Z072;D3Z5W6;D3Z4N9;Q922J9	Fatty acyl-CoA reductase 1
Dbn1	20.1909	1	0	3.565	23.5128	1	F7CPL2;A0A0R4J1E3;Q9QXS6	F7CPL2;A0A0R4J1E3;Q9QXS6	Drebrin
Ankrd13a	20.1894	7	0	17.055	26.1488	7	Q80UP5;F7B209;Q6PD24	Q80UP5;F7B209	Ankyrin repeat domain-containing protein 13A
Ddx1	20.1889	14	0	50.491	27.0458	14	Q91VR5;A0A1Y7VM48	Q91VR5	ATP-dependent RNA helicase DDX1
Otulin	20.1829	2	0	8.9466	23.1829	2	A0A2I3BRS5;Q3UCV8	A0A2I3BRS5;Q3UCV8	Ubiquitin thioesterase otulin
Slc25a22	20.1793	3	0	5.7353	23.0979	4	Q80X52;E9Q579;E9PV90;E9PY45;E9Q6M6;Q9D6M3;V9GWS2;A0A0J9YUX4;A0A0J9YTY6;G3UX09;A0A0J9YUJ4;A0A0J9YVJ3;Q9DB41	Q80X52;E9Q579;E9PV90;E9PY45;E9Q6M6;Q9D6M3;V9GWS2;A0A0J9YUX4;A0A0J9YTY6	Mitochondrial glutamate carrier 1
Gstm5	20.1755	4	0	5.6496	24.351	5	P48774;E9PVM7;E9PV63;E9Q024	P48774;E9PVM7;E9PV63	Glutathione S-transferase Mu 5
Ddi2	20.1743	5	0	15.526	25.0494	4	A2ADY9	A2ADY9	Protein DDI1 homolog 2
Ide	20.1724	9	0	24.769	26.6697	10	Q8CGB9;Q9JHR7	Q8CGB9;Q9JHR7	Insulin-degrading enzyme
Pam16	20.1723	3	0	25.741	24.8149	3	Q9CQV1;A0A1L1SQA2	Q9CQV1	Mitochondrial import inner membrane translocase subunit TIM16
Sirpa	20.1704	1	0	3.9779	22.7553	1	E0CX65	E0CX65
Pdk3	20.1653	5	0	15.974	24.7503	5	Q922H2	Q922H2	[Pyruvate dehydrogenase (acetyl-transferring)] kinase isozyme 3, mitochondrial
Umps	20.16	7	0	27.919	25.8922	9	P13439	P13439	Uridine 5-monophosphate synthase;Orotate phosphoribosyltransferase;Orotidine 5-phosphate decarboxylase
Mrpl27	20.1593	1	0	3.7485	23.1593	1	Q99N92	Q99N92	39S ribosomal protein L27, mitochondrial
Arhgef1	20.1552	15	0	44.754	27.408	15	E9PUF7;Q61210;F6ZN61;A0A0U1RPN7;A0A0U1RPH2;A0A0U1RPP2;D3YVJ9	E9PUF7;Q61210;F6ZN61	Rho guanine nucleotide exchange factor 1
Agpat3	20.1535	3	0	3.9731	24.9068	3	Q9D517	Q9D517	1-acyl-sn-glycerol-3-phosphate acyltransferase gamma
Slc9a9	20.1533	2	0	19.773	25.2001	3	Q8BZ00	Q8BZ00	Sodium/hydrogen exchanger 9
Mrpl50	20.1533	2	0.00030248	2.5159	23.9942	1	Q8VDT9	Q8VDT9	39S ribosomal protein L50, mitochondrial
Tbl2	20.153	4	0	15.79	25.1585	4	Q9R099;D3YZH8;F8WI46	Q9R099;D3YZH8	Transducin beta-like protein 2
Mboat7	20.1519	2	0	16.655	24.7323	3	Q8CHK3	Q8CHK3	Lysophospholipid acyltransferase 7
Slfn14	20.1507	7	0	17.015	26.0082	7	V9GXG1	V9GXG1
Wbp2	20.1505	2	0.0058236	1.5582	24.2023	2	P97765	P97765	WW domain-binding protein 2
Macrod1	20.1494	3	0	8.2039	23.9567	3	Q922B1	Q922B1	O-acetyl-ADP-ribose deacetylase MACROD1
Arfgap2	20.1478	4	0	9.3329	24.8482	4	Q99K28	Q99K28	ADP-ribosylation factor GTPase-activating protein 2
Slc25a13	20.1478	5	0	12.829	25.3658	7	Q9QXX4	Q9QXX4	Calcium-binding mitochondrial carrier protein Aralar2
Prkg1	20.1457	8	0	24.788	25.3064	8	P0C605;A0A5F8MPU4;A0A494BB87;E9QPH0;Q8CAH8;Q61410	P0C605;A0A5F8MPU4	cGMP-dependent protein kinase 1
	20.144	1	0.0055633	1.5906	24.3138	1	A0A2R8VI09;A0A2R8W6N3	A0A2R8VI09;A0A2R8W6N3
Mtmr2	20.1406	1	0	3.6836	22.4625	1	B8JJF6;Q9Z2D1	B8JJF6;Q9Z2D1	Myotubularin-related protein 2
Nedd4	20.1402	15	0	49.414	27.4228	15	P46935;A0A571BDN7;A0A571BEP7;Q3V335;V9GWV8;V9GXK3	P46935;A0A571BDN7;A0A571BEP7	E3 ubiquitin-protein ligase NEDD4
Numb	20.1361	1	0.0031012	1.7068	21.721	1	D3Z7J1;D3Z549;D3Z7I6;D3Z1E8;Q05BE7;Q9QZS3	D3Z7J1;D3Z549;D3Z7I6;D3Z1E8;Q05BE7;Q9QZS3	Protein numb homolog
Magt1	20.1353	3	0	7.1313	24.6056	2	A2ADH1;Q9CQY5	A2ADH1;Q9CQY5	Magnesium transporter protein 1
Nmnat3	20.1292	4	0	10.322	24.2991	4	Q99JR6;Q3V3C7;Q3V3F1	Q99JR6;Q3V3C7	Nicotinamide/nicotinic acid mononucleotide adenylyltransferase 3
Basp1	20.1259	2	0	46.954	23.9677	3	Q91XV3	Q91XV3	Brain acid soluble protein 1
Selenbp1;Selenbp2	20.1231	11	0	35.67	26.7987	12	P17563;Q63836;A0A0R4J135;G3UYY2;D6RHN2;G3UWK0;G3UZT2	P17563;Q63836;A0A0R4J135;G3UYY2	Selenium-binding protein 1;Selenium-binding protein 2
Mrpl28	20.1197	4	0	8.6882	25.1699	4	Q9D1B9;A0A494BBN2;A0A494BB47;F6U4U1	Q9D1B9;A0A494BBN2	39S ribosomal protein L28, mitochondrial
Cpsf6	20.115	3	0	4.7214	24.285	3	H3BJ30;H3BJW3;Q6NVF9;H3BKW0	H3BJ30;H3BJW3;Q6NVF9;H3BKW0	Cleavage and polyadenylation specificity factor subunit 6
Rab43	20.1146	6	0	22.986	25.7956	5	Q8CG50;D3Z444;Q91Z34	Q8CG50;D3Z444;Q91Z34	Ras-related protein Rab-43
Capzb	20.1113	1	0	11.306	24.1988	1	P47757;A0A0A0MQI9;F6YHZ8	P47757;A0A0A0MQI9;F6YHZ8	F-actin-capping protein subunit beta
Cd1d1;Cd1d2	20.1107	2	0	5.9304	24.2806	2	A0A0R4J090;P11609;E9Q395;E9QLX1;P11610	A0A0R4J090;P11609;E9Q395;E9QLX1;P11610	Antigen-presenting glycoprotein CD1d1;Antigen-presenting glycoprotein CD1d2
Fhl3	20.1078	4	0	11.168	24.8186	4	F2Z455;Q9R059	F2Z455;Q9R059	Four and a half LIM domains protein 3
Sec11c	20.1069	4	0	17.079	25.4156	5	D3Z5H3;Q9D8V7;D6RFV4;A0A494BAT3	D3Z5H3;Q9D8V7;D6RFV4;A0A494BAT3	Signal peptidase complex catalytic subunit SEC11C
Armc1	20.1062	2	0	7.1661	24.1479	4	Q9D7A8	Q9D7A8	Armadillo repeat-containing protein 1
Gbp9	20.1044	12	0	32.717	26.1163	13	Q8BTS3;A0A0G2JGT4;A0A0G2JEJ5;Q2V6D6;L7N1X8;A0A0G2JDV3;A4UUI3;A9YVJ5;Q000W5	Q8BTS3
Isca2	20.1043	2	0.0087671	1.4063	24.067	1	A0A1Y7VK19;Q9DCB8	A0A1Y7VK19;Q9DCB8	Iron-sulfur cluster assembly 2 homolog, mitochondrial
Ppp1r3d	20.1041	3	0	5.6019	24.0109	3	A2AJW4	A2AJW4	Protein phosphatase 1 regulatory subunit
Stard5	20.1033	3	0	5.9136	24.0989	3	Q9EPQ7;D3YU00	Q9EPQ7;D3YU00	StAR-related lipid transfer protein 5
Mki67	20.0985	55	0	245.04	29.536	67	E9PVX6;A0A1B0GQV9	E9PVX6
Trappc4	20.0964	4	0	5.8696	24.1481	5	Q9ES56;Q3V493;A0A1L1SR61	Q9ES56;Q3V493	Trafficking protein particle complex subunit 4
Adk	20.0961	7	0	22.187	26.3947	7	P55264;A0A286YCD7;A0A286YCN3	P55264;A0A286YCD7	Adenosine kinase
Dtd1	20.0946	1	0	2.8764	23.0946	1	Q9DD18	Q9DD18	D-tyrosyl-tRNA(Tyr) deacylase 1
Vps4b	20.0944	8	0	16.758	26.6706	8	P46467	P46467	Vacuolar protein sorting-associated protein 4B
Lrrc25	20.0933	1	0	4.1863	24.0002	1	Q8K1T1	Q8K1T1	Leucine-rich repeat-containing protein 25
Hnrnpr	20.0933	8	0	20.905	26.2246	9	Q8VHM5;F7B5B5;A2AW41;S4R1E9;A2AW40;V9GWW3	Q8VHM5;F7B5B5;A2AW41
A2m	20.0927	14	0	61.558	27.8989	18	Q61838;D3YUI3	Q61838	Alpha-2-macroglobulin;Alpha-2-macroglobulin 165 kDa subunit;Alpha-2-macroglobulin 35 kDa subunit
Mut	20.092	10	0	23.859	26.3523	10	P16332;A0A3B2WCT0	P16332	Methylmalonyl-CoA mutase, mitochondrial
Pqlc3	20.0889	1	0	2.95	22.0888	1	Q3UU83;A0A1Y7VLY9;Q8C6U2	Q3UU83;A0A1Y7VLY9;Q8C6U2	PQ-loop repeat-containing protein 3
Mpdu1	20.0881	2	0	3.8564	22.41	2	E9PVP3;Q5F2B1;F6XX36;Q8R0J2;Q9R0Q9;F6ZGG4	E9PVP3;Q5F2B1;F6XX36;Q8R0J2;Q9R0Q9;F6ZGG4	Mannose-P-dolichol utilization defect 1 protein
Oas1a;Oas1g	20.0874	7	0	22.162	25.6254	7	P11928;Q8K469;Q05BJ7	P11928;Q8K469	2-5-oligoadenylate synthase 1A
Msra	20.0858	2	0	5.8991	24.6879	3	Q9D6Y7;A0A1B0GT40	Q9D6Y7;A0A1B0GT40	Mitochondrial peptide methionine sulfoxide reductase
Matr3	20.085	8	0	35.736	26.5251	8	Q8K310;A0A494BAZ2;A0A494B9B1;A0A494BAZ7;A0A494BAD4;A0A494BAL7;A0A494B9X1;A0A494B9Q4;A0A494BAC5	Q8K310;A0A494BAZ2	Matrin-3
Tmx3	20.0841	7	0	21.201	26.0598	8	Q8BXZ1;A0A494BB11;A0A494B9P2	Q8BXZ1;A0A494BB11	Protein disulfide-isomerase TMX3
Arl2	20.0776	3	0	5.2834	23.4409	3	Q9D0J4	Q9D0J4	ADP-ribosylation factor-like protein 2
Acot8	20.0765	4	0	27.669	25.1415	5	P58137;Q8BZR4;G3UXJ8	P58137;Q8BZR4;G3UXJ8	Acyl-coenzyme A thioesterase 8
[truncated: 1,672 more rows]
