# Supplementary material for: Impaired iron recycling from erythrocytes is an early hallmark of aging
Source: eLife. 2023 Jan 31;12:e79196. doi: 10.7554/eLife.79196 (PMC9931393; doi:10.7554/eLife.79196)
Supplement: Figure 3—source data 3. [file elife-79196-fig3-data3.xlsx]

## Sheet: Arkusz1
Figure 3 - Source Data 3 Related to Figure 3 (F-G)
Splenic age–triggered iron deposits are rich in aggregation-prone proteins derived from damaged RPMs.
(F) Proteasomal activity was measured in RPMs derived from young, aged, and aged IR mice using a fluorescent proteasome activity probe with flow cytometry.
	Proteasomal activity (normalized MFI)
Young	0.466453	0.184118	0.963905	0.291171	0.408858	0.172835	1.45243	0.66369
Aged	1.88392	1.64258	1.49221	1.5222	1.65112	1.36275	1.36421	1.12299
Aged IR	0.643473	0.4947	2.02197	0.393298	1.40444	0.71275	0.683926
(G) The total iron content in magnetically-sorted RPMs derived from spleens of dextran- and iron dextran-injected mice was assessed using a commercial assay.
	Total iron in RPMs (ng/μL)
Dextran	126.117	112.764	98.0555
Iron Dextran	422.864	402.728	733.794
