# Supplementary material for: Impaired iron recycling from erythrocytes is an early hallmark of aging
Source: eLife. 2023 Jan 31;12:e79196. doi: 10.7554/eLife.79196 (PMC9931393; doi:10.7554/eLife.79196)
Supplement: Figure 3—source data 4. [file elife-79196-fig3-data4.xlsx]

## Sheet: Protein_Table_AggDex_allprot
Figure 3 - Source Data 4 Related to Figure 3 H
Protein groups identified in iron dextran-triggered splenic aggregates (log2 fold change > 1.5 versus dextran-injected controls) used for the Venn diagram.
Gene names	Log2 Intensity Difference AggDex vs Ctrl	Log2 Intensity AggDex 1	Log2 Intensity AggDex 2	Log2 Intensity ctr 1	Log2 Intensity ctrl 2	Log2 iBAQ	Q-value	Score	MS/MS count	Razor + unique peptides	Razor + unique peptides AggDex 1	Razor + unique peptides AggDex 2	Razor + unique peptides ctrl 1	Razor + unique peptides ctrl 2	Protein IDs	Majority protein IDs	Protein names
Spp2	7.53046	26.9446	25.7199	18.3372	19.2664	24.1366	0	13.449	8	3	3	3	0	0	Q8K1I3;A0A087WSF3	Q8K1I3	Secreted phosphoprotein 24
Bid	7.262	25.5785	26.3195	17.9804	19.3936	23.996	0	7.5225	4	2	1	2	0	0	P70444	P70444	BH3-interacting domain death agonist;BH3-interacting domain death agonist p15;BH3-interacting domain death agonist p13;BH3-interacting domain death agonist p11
Cdk7;Dclk3	6.10818	25.1953	25.2905	20.0744	18.195	21.9958	0.0098807	1.7353	2	1	1	1	0	0	Q03147;A0A286YDC0;Q8BWQ5	Q03147;A0A286YDC0;Q8BWQ5	Cyclin-dependent kinase 7;Serine/threonine-protein kinase DCLK3
C3	5.97177	31.1909	30.8302	24.9662	25.1114	25.344	0	181.65	92	49	46	46	18	18	P01027;H3BL60;H3BKW9	P01027	Complement C3;Complement C3 beta chain;C3-beta-c;Complement C3 alpha chain;C3a anaphylatoxin;Acylation stimulating protein;Complement C3b alpha chain;Complement C3c alpha chain fragment 1;Complement C3dg fragment;Complement C3g fragment;Complement C3d fragment;Complement C3f fragment;Complement C3c alpha chain fragment 2
Serpinf2	5.87334	25.2489	24.8911	19.4264	18.9669	21.8576	0	29.792	7	5	5	5	1	1	Q61247;Q5ND35	Q61247;Q5ND35	Alpha-2-antiplasmin
Stk26;Stk25	5.84327	24.1158	24.0116	18.1891	18.2519	20.566	0	4.4184	2	2	2	2	1	1	Q99JT2;A2AD84;Q9Z2W1;D3Z359	Q99JT2;A2AD84;Q9Z2W1;D3Z359	Serine/threonine-protein kinase 26;Serine/threonine-protein kinase 25
Serpina1c;Serpina1a	5.76035	27.083	24.9914	20.6531	19.9007	23.3131	0	6.5639	10	3	3	1	1	0	Q00896;P07758;A0A0R4J0X5;A0A0A0MQA3	Q00896;P07758;A0A0R4J0X5;A0A0A0MQA3	Alpha-1-antitrypsin 1-3;Alpha-1-antitrypsin 1-1
Pros1	5.47562	24.7376	23.9585	18.3706	19.3742	20.4	0	3.6943	1	1	1	1	0	0	Q08761	Q08761	Vitamin K-dependent protein S
Tfrc	5.28283	24.2252	23.1859	17.9017	18.9437	19.5493	0	5.7946	3	2	2	2	0	0	Q62351;Q8C872	Q62351;Q8C872	Transferrin receptor protein 1
Emd	5.26308	25.2478	24.2875	18.7631	20.246	22.2611	0.0038897	2.0662	2	2	2	2	0	0	O08579;Q3THM8;B7FAU5;I7HJS1	O08579;Q3THM8;B7FAU5;I7HJS1	Emerin
Lman2	5.17384	29.808	29.4135	24.4416	24.4322	26.3413	0	38.313	18	9	7	8	6	6	Q9DBH5	Q9DBH5	Vesicular integral-membrane protein VIP36
0610037L13Rik	5.09402	24.2262	23.9734	19.2665	18.745	21.8084	0.0055672	1.9162	1	1	1	1	1	0	Q8BHG2;A2A8E4;D6REH4;A2A8E2;B7ZC72;B7ZC71	Q8BHG2;A2A8E4;D6REH4;A2A8E2;B7ZC72;B7ZC71	UPF0587 protein C1orf123 homolog
Sqstm1	5.05683	24.5931	24.3035	21.2165	17.5664	21.3601	0	5.0701	1	2	2	2	1	0	Q64337;F6VD69;D3YZJ1	Q64337;F6VD69;D3YZJ1	Sequestosome-1
Cd177	5.05459	27.6549	28.8668	22.695	23.7175	24.1409	0	85.474	29	20	18	20	6	10	Q8R2S8	Q8R2S8	CD177 antigen
Mfge8	5.05164	29.0007	28.129	23.7304	23.296	25.2789	0	65.238	27	11	11	11	7	7	P21956	P21956	Lactadherin
Fam104a	5.03924	24.6771	24.1062	20.6696	18.0353	22.8433	0.002551	2.3965	1	2	2	2	0	1	A2A6P4	A2A6P4
Gmpr2	5.01101	23.6792	24.3653	19.004	19.0184	20.9752	0.0032304	2.2269	1	2	1	2	0	0	Q99L27;A0A2I3BQX8	Q99L27;A0A2I3BQX8	GMP reductase 2
Dok3	4.93702	23.7857	24.408	18.7837	19.536	20.6534	0	5.6057	3	3	2	3	1	1	Q9QZK7	Q9QZK7	Docking protein 3
Spcs1	4.88377	25.7307	25.8677	23.2617	18.5691	25.9199	0	3.1254	4	2	1	2	1	0	A0A2I3BRW0;Q9D958;A0A2I3BQG3	A0A2I3BRW0;Q9D958;A0A2I3BQG3	Signal peptidase complex subunit 1
Myo1d	4.86209	28.1398	26.8651	22.8441	22.4366	22.7296	0.0092087	1.7454	2	2	2	2	2	2	Q5SYD0	Q5SYD0	Unconventional myosin-Id
Bst2	4.81781	23.7462	23.2613	19.2678	18.1041	21.3541	0.0032316	2.2269	3	1	1	1	0	0	Q8R2Q8	Q8R2Q8	Bone marrow stromal antigen 2
Ly6e	4.8028	26.2898	25.8732	22.8085	19.7489	25.1769	0	10.761	4	1	1	1	1	1	A0A087WNS9;A0A087WQ65;A0A087WRZ2;A0A087WNT2;A0A087WPY4;Q64253	A0A087WNS9;A0A087WQ65;A0A087WRZ2;A0A087WNT2;A0A087WPY4;Q64253	Lymphocyte antigen 6E
Mmp8	4.77814	23.7348	25.2408	19.9372	19.4822	21.1525	0	11.15	4	4	3	4	0	0	O70138	O70138	Neutrophil collagenase
Adprh	4.77251	25.0214	25.0511	20.4723	20.0552	21.7668	0	11.49	3	3	2	3	1	1	P54923	P54923	[Protein ADP-ribosylarginine] hydrolase
Ly6g	4.74097	22.4798	23.6601	18.1714	18.4866	22.63	0	14.532	2	1	1	1	0	1	P35461;A0A668H4Q1	P35461;A0A668H4Q1	Lymphocyte antigen 6G
Pmpca	4.73957	24.0621	23.7839	18.6199	19.7469	19.9244	0	3.2727	1	2	2	2	0	1	Q9DC61;A2AIW9	Q9DC61;A2AIW9	Mitochondrial-processing peptidase subunit alpha
Pafah1b3	4.59258	25.4674	25.3763	19.926	21.7326	22.4927	0	16.468	6	4	3	4	1	2	Q61205;D3Z2X5;D3Z7E6;Q8CA83	Q61205;D3Z2X5;D3Z7E6;Q8CA83	Platelet-activating factor acetylhydrolase IB subunit gamma
Igkv5-39;Igkv5-43;Igkv5-45	4.55273	26.8711	24.5161	19.9856	22.2961	25.5935	0	16.798	4	2	2	2	0	1	A0A075B5M7;A0A0G2JDV4;A0A0B4J1J2;A0A0B4J1J1	A0A075B5M7;A0A0G2JDV4;A0A0B4J1J2;A0A0B4J1J1
Irf2	4.49669	23.8475	23.3412	19.1084	19.0869	21.0315	0.0035499	2.1218	1	1	1	1	0	0	P23906;A0A1B0GQZ7;A0A140LHP8;A0A140LJA4;A0A140LIX2;A0A1B0GQW5	P23906;A0A1B0GQZ7;A0A140LHP8;A0A140LJA4;A0A140LIX2;A0A1B0GQW5	Interferon regulatory factor 2
Mmp9	4.41628	27.078	28.1984	22.3337	24.1101	23.6883	0	52.861	21	16	14	16	5	13	P41245	P41245	Matrix metalloproteinase-9
Pik3r1	4.41242	24.0071	24.0365	19.9748	19.244	19.8048	0	4.3827	2	3	3	3	1	1	P26450;Q80UI5;A0A087WQM2	P26450;Q80UI5	Phosphatidylinositol 3-kinase regulatory subunit alpha
Ces1c;Ces1b	4.3968	24.4851	22.9612	19.6931	18.9596	20.3099	0	4.8152	2	3	3	2	1	0	P23953;D3Z5G7;Q8VCT4;Q8VCC2;E9PYP1	P23953;D3Z5G7	Carboxylesterase 1C;Carboxylic ester hydrolase
Ostm1	4.38688	25.1158	22.8999	20.4661	18.7758	21.7432	0	9.5278	2	2	2	1	1	0	Q8BGT0	Q8BGT0	Osteopetrosis-associated transmembrane protein 1
Gars	4.354	25.765	25.5829	19.7688	22.8712	21.4301	0	11.378	7	5	5	5	2	2	Q9CZD3	Q9CZD3	Glycine--tRNA ligase
Lsm5	4.32983	24.182	24.4492	21.0748	18.8968	23.8109	0	3.7113	7	1	1	1	1	0	P62322;A0A0N4SVK3	P62322;A0A0N4SVK3	U6 snRNA-associated Sm-like protein LSm5
Rpl32	4.32432	27.3829	27.2508	22.4348	23.5503	25.5864	0	16.671	8	3	2	3	1	2	P62911	P62911	60S ribosomal protein L32
Lyrm4	4.31152	23.5209	23.1595	18.9579	19.0994	22.0296	0.00074571	2.5845	2	1	1	1	0	0	Q8K215	Q8K215	LYR motif-containing protein 4
Lrg1	4.29663	22.872	23.7923	19.4153	18.6557	20.8899	0	4.449	2	2	2	2	2	1	Q91XL1	Q91XL1
Hist1h3b;H3f3a	4.27772	26.7212	26.3377	21.9581	22.5453	25.6155	0	37.33	28	1	1	1	1	1	P84228;A0A1W2P768;F8WI35;E0CYN1;E0CYR7	P84228;A0A1W2P768;F8WI35	Histone H3.2;Histone H3
Pglyrp1	4.27626	26.0815	27.6752	21.6092	23.5949	25.1661	0	46.281	10	5	3	5	2	3	O88593	O88593	Peptidoglycan recognition protein 1
Rbm6	4.27444	22.3615	22.1755	17.6477	18.3404	20.3004	0.00074488	2.5651	2	1	1	1	1	0	A0A0A6YY54;Q3ULB0;S4R1W5	A0A0A6YY54;Q3ULB0;S4R1W5
Ogfr	4.26485	23.1695	23.3034	19.4127	18.5305	18.9901	0	8.9186	1	1	1	1	0	0	Q99PG2	Q99PG2	Opioid growth factor receptor
Cbr3	4.24118	23.2459	23.0451	19.2423	18.5663	20.2421	0	5.0228	1	1	1	1	0	0	Q8K354	Q8K354	Carbonyl reductase [NADPH] 3
Ppp1cb	4.23981	23.7279	23.6037	18.4733	20.3786	20.5797	0	7.2948	4	1	1	1	1	1	P62141;A0A0J9YUG2	P62141	Serine/threonine-protein phosphatase PP1-beta catalytic subunit
Mrrf	4.23677	23.7991	23.4849	19.4864	19.324	21.1398	0	9.6025	3	2	2	2	1	1	Q9D6S7	Q9D6S7	Ribosome-recycling factor, mitochondrial
Ykt6	4.23374	23.7831	23.7713	19.5998	19.4872	20.9699	0	4.3399	2	2	1	1	0	0	Q9CQW1	Q9CQW1	Synaptobrevin homolog YKT6
Chp1	4.21415	24.1155	23.7451	19.6773	19.755	21.6954	0	6.4329	3	3	3	3	1	1	P61022;B0R091	P61022;B0R091	Calcineurin B homologous protein 1
Chchd4	4.17647	24.6578	24.2985	18.3853	22.2181	23.3095	0	5.4358	3	1	1	1	0	1	Q8VEA4	Q8VEA4	Mitochondrial intermembrane space import and assembly protein 40
Rab3d	4.14227	22.6483	22.9032	18.4489	18.818	19.9739	0	4.6388	1	1	1	1	0	0	P35276	P35276	Ras-related protein Rab-3D
Cds2	4.13367	24.3636	24.2731	18.3155	22.0538	21.3845	0	19.624	4	2	2	2	1	2	Q99L43;Q6PBC0;A2AMQ5	Q99L43;Q6PBC0;A2AMQ5	Phosphatidate cytidylyltransferase 2;Phosphatidate cytidylyltransferase
Hic2	4.12793	24.2375	23.949	18.4607	21.4701	20.7531	0	3.2837	3	1	1	1	0	1	Q9JLZ6	Q9JLZ6	Hypermethylated in cancer 2 protein
Cfh;Cfhr2	4.12153	24.6327	21.974	19.3403	19.0233	19.0119	0.00075131	2.6674	2	2	2	1	0	0	P06909;A0A0A6YVP8;A0A0A6YWP4;D6RGQ0;E9Q8H9;E9Q8I0;Q4LDF6;Q61405;A0A668KLU9	P06909;A0A0A6YVP8;A0A0A6YWP4;D6RGQ0;E9Q8H9;E9Q8I0;Q4LDF6;Q61405;A0A668KLU9	Complement factor H
Sephs1	4.1187	22.7406	22.5659	18.0601	19.009	19.9555	0.00075019	2.6472	2	1	1	1	0	0	Q8BH69	Q8BH69	Selenide, water dikinase 1
Tiprl	4.11326	23.8049	25.0434	19.2966	21.3252	21.7391	0	4.1815	3	3	2	3	1	2	Q8BH58;A0A0A6YY87	Q8BH58	TIP41-like protein
Drap1	4.10859	24.3685	24.3011	21.7717	18.6807	22.4655	0	4.4814	5	2	2	2	2	1	Q9D6N5;D3YYC2;F6T9K1;G3UXH5;D3YY09	Q9D6N5;D3YYC2;F6T9K1;G3UXH5;D3YY09	Dr1-associated corepressor
Huwe1	4.09976	23.3877	22.8937	19.2433	18.8386	16.7354	0	4.6583	4	2	2	2	1	1	Q7TMY8;A2AFQ0	Q7TMY8;A2AFQ0	E3 ubiquitin-protein ligase HUWE1
Kmo	4.06214	24.2576	23.9256	21.1785	18.8805	20.4928	0	9.3166	9	4	3	4	2	1	Q91WN4;Q3V0K6	Q91WN4	Kynurenine 3-monooxygenase
Csnk1a1	4.02294	22.7819	22.7493	18.7347	18.7507	19.6039	0.0082673	1.8291	2	2	1	2	1	1	Q8BK63;E9Q4G7;E9Q3W1;E9PWB2;F6YBC9;H7BXB1;E9Q2U6	Q8BK63;E9Q4G7;E9Q3W1;E9PWB2;F6YBC9;H7BXB1;E9Q2U6	Casein kinase I isoform alpha
Hspg2	4.01771	22.2149	23.3127	19.4043	18.0879	16.4791	0.00074878	2.6351	2	2	2	2	1	1	E9PZ16;Q05793;B1B0C7	E9PZ16;Q05793;B1B0C7	Basement membrane-specific heparan sulfate proteoglycan core protein;Endorepellin;LG3 peptide
Mrps26	3.98917	23.7718	23.4289	19.3445	19.8779	21.24	0	3.4507	1	2	2	2	1	1	Q80ZS3	Q80ZS3	28S ribosomal protein S26, mitochondrial
Cfp	3.96862	27.6456	26.6588	22.6694	23.6977	24.1548	0	41.022	11	5	5	5	3	5	P11680	P11680	Properdin
Sec61a1;Sec61a2	3.96439	23.9989	24.6307	22.0581	18.6427	21.5019	0	4.5562	6	2	1	2	1	1	P61620;Q9JLR1;A2ATT9;Q9CYJ6	P61620;Q9JLR1;A2ATT9;Q9CYJ6	Protein transport protein Sec61 subunit alpha isoform 1;Protein transport protein Sec61 subunit alpha isoform 2
Psmd5	3.94393	25.6843	24.7608	21.1737	21.3836	21.6815	0	6.8143	6	3	3	2	1	1	Q8BJY1	Q8BJY1	26S proteasome non-ATPase regulatory subunit 5
Pml	3.93754	26.3403	26.5494	22.605	22.4096	22.1475	0	21.166	10	7	7	7	3	3	Q60953;F7BTZ2;D3Z3A6;D3YXR5;D3Z2V0	Q60953;F7BTZ2;D3Z3A6;D3YXR5	Protein PML
Rpe	3.9191	23.185	23.6247	18.8829	20.0886	21.4914	0	18.398	2	1	1	1	0	1	Q8VEE0;M0QWJ2;A0A087WQM3;M0QWQ0;B2KGF0	Q8VEE0;M0QWJ2;A0A087WQM3;M0QWQ0;B2KGF0	Ribulose-phosphate 3-epimerase
Evi2b	3.91847	25.8139	25.2153	20.2295	22.9628	23.2016	0	6.408	6	2	2	2	1	2	Q8VD58	Q8VD58	Protein EVI2B
Cd79b	3.91593	23.7902	23.787	19.8707	19.8746	21.9813	0	7.3717	2	1	1	1	0	0	P15530;B1ARJ9	P15530;B1ARJ9	B-cell antigen receptor complex-associated protein beta chain
Abcf2	3.90835	24.7415	23.2411	19.2363	20.9296	20.1868	0	7.5962	2	3	3	2	1	2	Q99LE6	Q99LE6	ATP-binding cassette sub-family F member 2
Nasp	3.90494	25.0645	25.0958	21.0748	21.2755	20.8161	0	30.741	6	4	4	4	2	2	Q99MD9;B1AU76;B1AU75	Q99MD9;B1AU76;B1AU75	Nuclear autoantigenic sperm protein
Tomm40	3.89657	24.7527	22.9594	19.6967	20.2223	21.7389	0	17.512	5	2	2	2	1	1	Q9QYA2	Q9QYA2	Mitochondrial import receptor subunit TOM40 homolog
Plgrkt	3.89568	23.5274	25.0831	19.9689	20.8503	22.4214	0	3.4239	5	2	2	2	2	2	Q9D3P8	Q9D3P8	Plasminogen receptor (KT)
Camp	3.87766	30.2172	30.7838	26.2537	26.9919	29.0394	0	73.972	20	4	4	4	4	4	P51437	P51437	Cathelin-related antimicrobial peptide
Clk3	3.87212	23.8688	23.4008	19.9155	19.6099	19.6191	0	8.5294	4	2	2	2	1	1	O35492;A0A1L1SST3	O35492;A0A1L1SST3	Dual specificity protein kinase CLK3
Htra2	3.87201	24.5843	24.2113	20.471	20.5806	21.045	0	5.6686	4	3	3	3	1	1	Q9JIY5;F6TCV0;D3YX27;F6XUR8;S4R1B3;D3YX28;S4R1A8	Q9JIY5;F6TCV0;D3YX27;F6XUR8;S4R1B3;D3YX28	Serine protease HTRA2, mitochondrial
Cav1;Cav3	3.84161	25.1951	24.3525	20.482	21.3824	22.6104	0	8.8733	4	2	2	2	1	2	P49817;D3Z148;P51637;D3Z0J2;H3BKG0	P49817;D3Z148;P51637;D3Z0J2;H3BKG0	Caveolin-1;Caveolin;Caveolin-3
Tbc1d13	3.84144	23.191	23.4317	19.5101	19.4298	19.713	0	4.5465	2	2	2	2	1	1	Q8R3D1	Q8R3D1	TBC1 domain family member 13
Caprin1	3.8327	26.5851	26.2038	22.6807	22.4428	23.1121	0	25.973	9	5	5	5	3	3	Q60865;F6YLI0	Q60865	Caprin-1
Ltf	3.82783	31.3969	32.5664	27.7358	28.5718	27.6998	0	323.31	139	40	39	40	35	35	P08071;A0A0G2JEA3;A0A0G2JFM6;A0A0G2JDN0;A0A0G2JGN1;A0A0G2JGX1	P08071	Lactotransferrin
Psmd13	3.80577	28.0155	29.7647	23.3669	26.8017	25.5879	0	13.798	10	5	5	5	4	5	Q9WVJ2;E9Q5I9;E9Q0U1	Q9WVJ2;E9Q5I9;E9Q0U1	26S proteasome non-ATPase regulatory subunit 13
Serpina3k	3.80411	29.5191	28.4728	25.3468	25.0369	25.9351	0	133.61	38	14	14	13	12	11	A0A0R4J0I1;P07759;P29621;Q5I2A0;E9Q499;F2Z405;Q80X76	A0A0R4J0I1;P07759	Serine protease inhibitor A3K
Ndufb6	3.80111	23.7822	23.5813	19.4466	20.3146	21.7534	0	8.1584	4	1	1	1	0	1	Q3UIU2;A2AP32	Q3UIU2;A2AP32	NADH dehydrogenase [ubiquinone] 1 beta subcomplex subunit 6
Mug1;Mug2	3.79197	29.2736	28.2008	25.2397	24.6508	23.8648	0	104.02	38	15	15	13	9	10	P28665;P28666;A0A0N4SVU1	P28665;P28666	Murinoglobulin-1;Murinoglobulin-2
Mansc4	3.77685	23.2267	22.5313	19.3461	18.8582	20.1131	0.005571	1.93	1	1	1	1	0	0	Q3UU94;A0A0N4SUP6	Q3UU94;A0A0N4SUP6	MANSC domain-containing protein 4
Wfdc21	3.76858	23.2297	24.6517	20.5588	19.7854	23.5845	0	5.0257	1	1	1	1	1	0	Q8BTE6	Q8BTE6
Eif4e	3.75097	26.5147	26.1361	22.1636	22.9853	23.9849	0	15.795	5	3	3	3	1	2	P63073;A0A0G2JH04;A0A0G2JFB4;A0A0G2JGT5;A0A0G2JG98	P63073;A0A0G2JH04;A0A0G2JFB4;A0A0G2JGT5	Eukaryotic translation initiation factor 4E
Tmem55b	3.7509	25.9017	25.4263	21.6394	22.1869	23.2024	0	12.637	7	3	3	3	1	2	Q3TWL2;F8WHW3;E0CYE6;E0CZF6;E0CZ18	Q3TWL2;F8WHW3;E0CYE6	Type 1 phosphatidylinositol 4,5-bisphosphate 4-phosphatase
Trappc3	3.74649	24.4368	24.2633	20.6455	20.5616	22.2863	0	3.5201	3	2	2	2	1	1	O55013	O55013	Trafficking protein particle complex subunit 3
Itgb2l	3.73835	22.0361	23.1644	20.5767	17.1471	18.3859	0	4.4188	1	1	1	1	0	0	Q3UV74;D3YXH8	Q3UV74;D3YXH8	Integrin beta-2-like protein;Integrin beta
Vtn	3.73526	29.9452	28.9485	25.9329	25.4903	26.1717	0	57.481	30	7	7	7	6	4	P29788	P29788	Vitronectin
Smtn	3.70241	22.8071	22.7573	19.0084	19.1512	18.323	0.002197	2.4395	0	2	2	2	0	0	Q921U8;D3Z3Q3;D3Z525;D3YZ10	Q921U8;D3Z3Q3;D3Z525;D3YZ10	Smoothelin
Prkab1	3.7009	23.0335	22.7031	20.5245	17.8103	20.312	0	5.2531	1	1	1	1	1	0	Q9R078	Q9R078	5-AMP-activated protein kinase subunit beta-1
Igkv4-55;Igkv4-72;Igkv4-57	3.69382	25.5271	22.8861	18.3435	22.6821	23.32	0	21.223	3	2	2	2	0	1	A0A0B4J1I9;A0A0B4J1I4;A0A0A6YYE7;P04945	A0A0B4J1I9;A0A0B4J1I4;A0A0A6YYE7;P04945	Ig kappa chain V-VI region NQ2-6.1
Akap8	3.69148	23.1002	24.4304	20.0289	20.1187	20.256	0.00038388	2.9615	1	2	1	2	1	1	Q9DBR0	Q9DBR0	A-kinase anchor protein 8
Col6a3	3.69005	24.7504	26.4868	20.503	23.3541	19.7266	0	39.779	14	11	9	11	3	9	J3QQ16;A0A087WS16;E9PWQ3;D3YWD1	J3QQ16;A0A087WS16;E9PWQ3;D3YWD1
Bola2	3.68838	25.5615	25.339	22.075	21.4487	24.2426	0	8.757	6	3	2	3	2	2	Q8BGS2	Q8BGS2	BolA-like protein 2
Lcn2	3.68714	27.7458	29.0755	24.3803	25.0667	26.6591	0	22.147	24	6	5	6	4	5	P11672;A0A0A6YW77	P11672;A0A0A6YW77	Neutrophil gelatinase-associated lipocalin
Rab11fip1;Rab11fip2	3.68366	23.8238	23.7823	20.2014	20.0373	19.1027	0	9.1423	3	2	2	2	0	0	E9Q8L9;Q9D620;G3XA57;G3UW57;A0A1B0GRJ0	E9Q8L9;Q9D620;G3XA57;G3UW57;A0A1B0GRJ0	Rab11 family-interacting protein 1;Rab11 family-interacting protein 2
Mbl2	3.6537	22.7572	21.6163	18.0679	18.9982	19.7497	0	14.431	1	1	1	1	1	0	P41317	P41317	Mannose-binding protein C
Aspscr1	3.64476	22.6891	23.2562	19.4262	19.2297	19.3547	0	3.1585	1	2	2	2	1	1	Q8VBT9;E9Q779;E9PWZ4;A2AC01;E9PVI1;A2AC02;A2AC03;A2AC05;A2ABZ8	Q8VBT9;E9Q779;E9PWZ4;A2AC01;E9PVI1;A2AC02;A2AC03;A2AC05;A2ABZ8	Tether containing UBX domain for GLUT4
Unc13d	3.64329	26.2379	26.1669	21.9312	23.1871	21.6803	0	18.602	7	7	7	6	3	4	B2RUP2;A0A0R4J257;A2A858;A2A855	B2RUP2;A0A0R4J257	Protein unc-13 homolog D
Pgam5	3.64213	23.7349	23.9958	21.9026	18.5438	20.7228	0.0032444	2.273	1	2	1	2	1	0	Q8BX10;A0A0G2JG95	Q8BX10;A0A0G2JG95	Serine/threonine-protein phosphatase PGAM5, mitochondrial
Ubash3b	3.63999	24.1968	23.5623	20.9419	19.5372	20.0813	0	9.7117	3	3	3	2	2	1	Q8BGG7;D3YVT5	Q8BGG7	Ubiquitin-associated and SH3 domain-containing protein B
Serpina3n	3.63895	26.1822	24.6839	21.9296	21.6587	22.1332	0	30.965	5	4	4	3	1	1	G3X8T9;Q91WP6	G3X8T9;Q91WP6	Serine protease inhibitor A3N
Gvin1	3.62976	21.8275	23.0607	19.1593	18.4693	16.6063	0.0032212	2.1921	1	2	1	2	0	0	Q80SU7;L7N451	Q80SU7;L7N451	Interferon-induced very large GTPase 1
Ube2d3;Ube2d2;Ube2d2b;Ube2d1	3.62475	26.094	25.7775	22.2779	22.3441	25.0562	0	8.4617	3	2	2	2	2	2	P61079;P62838;A0A494BAN1;A0A494BA56;A0A0G2JE32;A0A0G2JGL0;Q6ZWY6;P61080	P61079;P62838;A0A494BAN1;A0A494BA56;A0A0G2JE32;A0A0G2JGL0;Q6ZWY6;P61080	Ubiquitin-conjugating enzyme E2 D3;Ubiquitin-conjugating enzyme E2 D2;Ubiquitin-conjugating enzyme E2 D2B;Ubiquitin-conjugating enzyme E2 D1
Nup62	3.6232	24.6198	24.0623	20.7932	20.6424	22.1566	0	17.359	4	2	2	2	1	1	Q63850	Q63850	Nuclear pore glycoprotein p62
Fcrla	3.62069	24.9592	24.5436	20.4689	21.7925	21.9825	0	8.9456	9	3	3	3	1	2	Q920A9;E0CX78;F7DEW9;E0CY58	Q920A9;E0CX78;F7DEW9	Fc receptor-like A
Osbpl8	3.61197	25.2714	24.9278	22.2436	20.7317	20.5372	0	10.329	8	5	5	5	3	2	B9EJ86;A0A0R4J150;A0A5F8MPC5	B9EJ86;A0A0R4J150;A0A5F8MPC5	Oxysterol-binding protein
Serpina1b;Serpina1e	3.60773	29.6448	28.1802	25.5399	25.0696	26.1056	0	69.835	28	10	10	8	7	7	P22599;Q00898;D3YZL0	P22599;Q00898	Alpha-1-antitrypsin 1-2;Alpha-1-antitrypsin 1-5
Nt5c2	3.60352	23.6601	23.3042	20.4337	19.3236	19.7192	0	12.304	2	1	1	1	1	0	Q3V1L4;A0A494BBP6;A0A494B9X3;E9Q9M1	Q3V1L4;A0A494BBP6;A0A494B9X3;E9Q9M1	Cytosolic purine 5-nucleotidase
Kynu	3.60181	24.574	24.5705	21.6429	20.2979	21.2391	0	5.1192	3	3	3	3	3	1	Q9CXF0;A2ARD6;A2ARD7;Q6NSV5	Q9CXF0;A2ARD6;A2ARD7;Q6NSV5	Kynureninase
Pcbd2	3.59648	24.6765	24.6647	21.1677	20.9805	22.7854	0	35.357	8	4	3	4	1	2	A0A0R4J1R7;Q9CZL5	A0A0R4J1R7;Q9CZL5	Pterin-4-alpha-carbinolamine dehydratase 2
Ppp2r5d	3.56617	23.1988	22.9993	20.7644	18.3013	19.3806	0	14.516	4	3	3	3	3	0	Q7TNL5;Q91V89;A0A1Y7VIR0	Q7TNL5;Q91V89
Sap18;Gm10094	3.56403	26.3916	26.623	22.6235	23.263	24.172	0	6.1862	7	3	2	3	1	2	O55128;E9Q317;D3YY73;D3Z2N9;D3YY55	O55128;E9Q317;D3YY73;D3Z2N9	Histone deacetylase complex subunit SAP18
Rel	3.55902	26.4909	26.2521	22.9295	22.6954	22.9703	0	17.689	8	9	8	9	5	4	A4QPD3;P15307	A4QPD3;P15307	Proto-oncogene c-Rel
Ly9	3.54902	23.079	22.7082	19.5667	19.1224	19.07	0	5.3118	4	2	2	2	1	1	Q01965;E9PX73;E9PV93	Q01965;E9PX73;E9PV93	T-lymphocyte surface antigen Ly-9
Actbl2	3.54641	26.1415	26.2099	22.7741	22.4844	22.9028	0	4.1442	6	2	2	2	1	1	Q8BFZ3	Q8BFZ3	Beta-actin-like protein 2
Pdia5	3.53814	22.3805	22.0702	19.1952	18.1793	18.7101	0	5.6759	1	1	1	1	0	0	Q921X9	Q921X9	Protein disulfide-isomerase A5
Serpina1d	3.53749	27.597	26.3381	24.225	22.6351	24.0561	0	16.898	13	5	5	5	4	3	Q00897	Q00897	Alpha-1-antitrypsin 1-4
Mtx1	3.53514	23.3468	23.276	18.9474	20.6051	20.2483	0	3.3188	1	1	1	1	0	1	P47802;G3UXX9;D3YVW0;G3XA66;Q8R5C0;A0A6I8MWZ8	P47802;G3UXX9;D3YVW0;G3XA66;Q8R5C0;A0A6I8MWZ8	Metaxin-1
Vps25	3.52518	23.4287	23.0574	19.1536	20.2822	21.0221	0	24.987	2	1	1	1	0	1	Q9CQ80;A8XY17;A2A4J8	Q9CQ80;A8XY17;A2A4J8	Vacuolar protein-sorting-associated protein 25
Aldh3a2	3.52187	26.0344	25.9012	21.9961	22.8957	22.7734	0	15.007	13	6	6	6	3	4	P47740;B1ATI0;B1AV77	P47740;B1ATI0;B1AV77	Fatty aldehyde dehydrogenase;Aldehyde dehydrogenase
Plg	3.51901	25.2475	24.8024	22.6226	20.3893	20.7051	0	10.646	3	2	2	2	2	1	P20918	P20918	Plasminogen;Plasmin heavy chain A;Activation peptide;Angiostatin;Plasmin heavy chain A, short form;Plasmin light chain B
Ipo5	3.51704	25.4574	25.0928	21.9489	21.5672	20.6261	0	12.45	5	3	3	3	3	2	Q8BKC5	Q8BKC5	Importin-5
Entpd1	3.50245	25.3631	24.4342	19.0659	23.7265	22.0783	0	5.1646	4	2	2	2	0	1	P55772;Q8CDV7;D6RFA9;F7B9M9;D6RHQ2	P55772;Q8CDV7;D6RFA9;F7B9M9;D6RHQ2	Ectonucleoside triphosphate diphosphohydrolase 1
Tmem106a	3.49458	25.3664	24.2422	20.8268	21.7926	22.8616	0	4.5003	3	2	2	2	1	2	Q8VC04;A2A4M9;A2A4N0	Q8VC04;A2A4M9;A2A4N0	Transmembrane protein 106A
Apoh	3.49437	22.7735	21.8797	19.2158	18.4486	19.0129	0.0018416	2.4662	1	1	1	1	1	0	Q01339	Q01339	Beta-2-glycoprotein 1
Samm50	3.49126	26.2727	25.5234	22.6495	22.1641	22.1599	0	8.1006	6	5	5	5	2	2	Q8BGH2	Q8BGH2	Sorting and assembly machinery component 50 homolog
Nck2	3.48897	23.5365	23.0691	19.9095	19.7181	19.9199	0.0021938	2.4332	0	2	2	2	1	1	O55033	O55033	Cytoplasmic protein NCK2
Ighg3	3.48779	23.9649	23.0045	18.9783	21.0155	20.8742	0.00038066	2.8292	2	2	2	2	0	1	A0A075B5P5;A0A1Y7VJN6;P03987	A0A075B5P5;A0A1Y7VJN6;P03987	Ig gamma-3 chain C region
Cd9	3.47859	26.495	25.8373	22.8644	22.5107	24.7402	0	13.161	7	2	2	2	2	2	P40240	P40240	CD9 antigen
Dhfr	3.46214	24.2315	24.0775	21.5178	19.8669	21.683	0	3.5132	2	1	1	1	1	0	P00375	P00375	Dihydrofolate reductase
Sypl;Sypl1	3.46013	25.6972	25.3369	22.2511	21.8628	24.0689	0	8.5093	7	2	2	2	1	2	D6RFU9;O09117	D6RFU9;O09117	Synaptophysin-like protein 1
Tsn	3.45525	24.9764	24.6868	21.5078	21.2449	22.2642	0	10.571	5	3	3	3	2	2	Q62348	Q62348	Translin
Cox7a2	3.44621	29.1641	28.6627	25.4553	25.4792	28.0599	0	14.143	18	2	2	2	2	2	P48771	P48771	Cytochrome c oxidase subunit 7A2, mitochondrial
Cd22	3.44595	23.1321	23.4224	19.4343	20.2282	19.1672	0	8.4015	3	2	2	2	1	2	P35329;Q3UP36;A0A087WR31;A0A087WR96;A0A1L1SSS3	P35329;Q3UP36;A0A087WR31;A0A087WR96;A0A1L1SSS3	B-cell receptor CD22
Ppa2	3.43959	23.814	23.675	20.4224	20.1874	20.6258	0	6.0096	3	3	3	3	2	2	Q91VM9;D3Z636;G8JL76	Q91VM9;D3Z636	Inorganic pyrophosphatase 2, mitochondrial
Fdx1l	3.43535	22.9122	21.3446	18.2975	19.0886	20.0096	0.0038856	2.0429	0	2	2	1	0	0	Q9CPW2	Q9CPW2	Adrenodoxin-like protein, mitochondrial
Arhgap18	3.43291	24.3701	23.3276	19.0677	21.7641	19.7348	0	4.7252	3	2	2	1	1	2	Q8K0Q5;H3BJL1	Q8K0Q5;H3BJL1	Rho GTPase-activating protein 18
Gga1	3.43214	22.7649	23.2605	19.518	19.6432	19.7007	0	6.3656	4	2	2	2	1	2	Q8R0H9;A0A2R8VI72	Q8R0H9;A0A2R8VI72	ADP-ribosylation factor-binding protein GGA1
Kars	3.42709	27.4767	27.035	23.5369	24.1205	23.5946	0	28.803	18	10	10	10	6	7	Q99MN1;Q8R2P8	Q99MN1;Q8R2P8	Lysine--tRNA ligase
Serpina3m	3.41764	22.3444	21.4601	18.1838	18.7853	18.6356	0	7.0494	3	1	1	1	1	1	Q03734	Q03734	Serine protease inhibitor A3M
Kpna3	3.41425	23.9117	23.4028	20.8774	19.6085	20.6919	0	5.5205	5	2	2	1	1	0	O35344	O35344	Importin subunit alpha-4
Sap30bp	3.40948	23.8327	23.3701	20.2017	20.1822	20.748	0	6.5877	2	2	2	2	1	1	Q02614	Q02614	SAP30-binding protein
Slc25a1	3.40605	25.3337	25.2394	23.3401	20.4209	22.315	0.00075472	2.7392	3	2	2	2	2	1	Q8JZU2;F6VVY4	Q8JZU2;F6VVY4	Tricarboxylate transport protein, mitochondrial
Ahcyl2;Ahcyl1	3.40534	25.8173	25.5835	22.3664	22.2237	21.977	0	7.1881	10	3	3	3	2	2	Q68FL4;F8WGT1;Q80SW1;H3BKT5;F8WI65;E9PX77	Q68FL4;F8WGT1;Q80SW1;H3BKT5;F8WI65	Putative adenosylhomocysteinase 3;Adenosylhomocysteinase;Putative adenosylhomocysteinase 2
Copz1	3.40034	25.6171	25.82	23.2266	21.4099	24.5557	0	13.633	8	4	4	4	4	2	P61924;A0A2R8VJV3;Q8R3M1	P61924;A0A2R8VJV3;Q8R3M1	Coatomer subunit zeta-1
Cd1d1	3.39816	26.2805	25.5674	23.7012	21.3504	22.9667	0	7.0639	6	3	3	3	3	1	A0A0R4J090;E9Q395;P11609	A0A0R4J090;E9Q395;P11609	Antigen-presenting glycoprotein CD1d1
Col6a1	3.39026	22.8879	24.1996	18.7581	21.5489	19.1706	0	7.1236	2	2	2	2	0	2	Q04857	Q04857	Collagen alpha-1(VI) chain
	3.38504	25.9294	25.8091	23.4244	21.5441	25.4448	0	2.9865	5	1	1	1	1	1	P0DN34	P0DN34
Tinagl1	3.38381	22.0374	23.2492	18.3646	20.1544	19.5584	0.0038911	2.0747	1	1	1	1	0	1	H3BJ97;Q99JR5	H3BJ97;Q99JR5	Tubulointerstitial nephritis antigen-like
Magoh;Magohb	3.38303	25.8709	27.6471	23.3806	23.3713	24.806	0	10.993	10	4	3	4	2	2	P61327;Q9CQL1;G3UZW7;A0A023T778	P61327;Q9CQL1;G3UZW7;A0A023T778	Protein mago nashi homolog;Protein mago nashi homolog 2
Lsm2	3.37457	22.7078	23.0683	20.724	18.3029	21.3143	0	3.6025	2	1	1	1	0	0	O35900;O35901	O35900;O35901	U6 snRNA-associated Sm-like protein LSm2
Slc9a3r2	3.37417	24.1216	23.9233	21.8361	19.4605	20.8539	0.0038705	1.9932	3	1	1	1	1	0	Q9JHL1;A0A3Q4EHM9;A0A0R4J006;A0A3Q4EBU8;Q6NS54;A0A0R4IZX2	Q9JHL1;A0A3Q4EHM9;A0A0R4J006;A0A3Q4EBU8;Q6NS54;A0A0R4IZX2	Na(+)/H(+) exchange regulatory cofactor NHE-RF2;Na(+)/H(+) exchange regulatory cofactor NHE-RF
Cuta	3.37319	24.4563	24.236	22.2191	19.7268	23.5323	0	10.012	4	2	2	2	2	1	D5MCW4;Q9CQ89	D5MCW4;Q9CQ89	Protein CutA
Smap1	3.37104	24.4537	24.0714	22.6626	19.1204	22.3237	0	3.0429	2	1	1	1	1	0	Q91VZ6	Q91VZ6	Stromal membrane-associated protein 1
Serpinh1	3.36932	27.0068	25.7374	22.5611	23.4444	23.1112	0	14.375	9	5	5	4	3	4	P19324;A0A140LHR4;A0A140LHK0	P19324	Serpin H1
Qars	3.36669	26.4441	26.1685	22.9338	22.9454	21.9863	0	24.066	15	10	10	9	7	6	D3Z158;Q8BML9;A0A0A6YY08;A0A140LIN2;A0A140LIR0;A0A140LJH2;A0A140LID3;A0A140LJH1;A0A140LHJ3;A0A140LHB3;A0A140LIS6;A0A140LHZ5;A0A140LJK5	D3Z158;Q8BML9;A0A0A6YY08;A0A140LIN2
Cyb5r1	3.3659	23.9955	23.7586	19.515	21.5073	21.2389	0	7.6033	4	3	3	3	1	2	Q9DB73;G3UZG6	Q9DB73;G3UZG6	NADH-cytochrome b5 reductase 1
Padi2	3.36425	22.8281	22.766	19.9641	18.9015	19.0329	0	5.6354	4	2	2	2	2	2	Q08642	Q08642	Protein-arginine deiminase type-2
Serpinc1	3.36358	24.6799	23.8046	22.4712	19.2861	20.6092	0	4.4424	2	2	2	2	2	1	P32261;A0A0A6YWH7;A0A0A6YX70	P32261;A0A0A6YWH7	Antithrombin-III
Hp	3.36299	29.2439	28.6672	25.6073	25.5779	25.7936	0	44.195	34	12	12	11	6	9	Q61646	Q61646	Haptoglobin;Haptoglobin alpha chain;Haptoglobin beta chain
Myo1e	3.36064	24.3204	23.67	20.7927	20.4764	19.2805	0	3.8533	1	3	3	2	2	1	E9Q634	E9Q634	Unconventional myosin-Ie
Tmem258	3.35384	23.0819	22.8203	20.4578	18.7366	23.0792	0.00074405	2.5624	2	1	1	1	1	0	P61166	P61166	Transmembrane protein 258
Larp1	3.34923	23.5823	23.6449	18.8738	21.655	18.9543	0	8.8183	7	2	2	2	1	2	Q6ZQ58;Z4YJT3	Q6ZQ58;Z4YJT3	La-related protein 1
Rad23a	3.34787	23.2005	23.0423	19.9409	19.6062	20.4521	0	10.5	4	2	2	2	1	1	P54726;Q8CAP3;Q3TN85;F6YL88	P54726;Q8CAP3;Q3TN85	UV excision repair protein RAD23 homolog A
	3.34457	22.5988	21.7828	18.7955	18.897	21.0564	0	6.7989	2	1	1	1	1	1	A0A0G2JE99;P01843	A0A0G2JE99;P01843	Ig lambda-1 chain C region
Hpx	3.34075	27.129	26.062	23.4008	23.1087	23.0651	0	21.616	10	6	6	6	4	4	Q91X72	Q91X72	Hemopexin
Pin4	3.3405	23.427	24.0414	22.1968	18.5907	21.9912	0	4.7286	1	1	1	1	1	0	Q9CWW6	Q9CWW6	Peptidyl-prolyl cis-trans isomerase NIMA-interacting 4
Irgm2	3.33908	23.9131	22.998	19.025	21.2079	20.3428	0	7.1791	1	1	1	1	0	1	Q9Z1M2;A0A140LIF8	Q9Z1M2;A0A140LIF8
A2m	3.33599	30.2425	29.1975	26.4485	26.3196	24.9636	0	95.62	47	17	17	17	14	13	Q61838;Q6GQT1;D3YUI3;CON__ENSEMBL:ENSBTAP00000024146	Q61838	Alpha-2-macroglobulin;Alpha-2-macroglobulin 165 kDa subunit;Alpha-2-macroglobulin 35 kDa subunit
Utp23	3.32561	22.9895	22.5794	19.6174	19.3002	22.799	0.0025445	2.3725	2	1	1	1	0	0	G3X989;E0CYI7;Q9CX11	G3X989;E0CYI7;Q9CX11	rRNA-processing protein UTP23 homolog
Prtn3	3.32355	26.7142	26.9264	24.2797	22.7139	24.2803	0	24.106	14	5	5	5	3	4	Q61096;A0A0R4IZY6;F6ZK01	Q61096;A0A0R4IZY6	Myeloblastin
Degs1	3.32325	22.4555	22.7225	19.9426	18.5888	20.3836	0	4.0358	1	1	1	1	1	0	O09005	O09005	Sphingolipid delta(4)-desaturase DES1
Elane	3.32315	27.7913	28.3728	24.7907	24.7271	25.661	0	13.681	16	6	6	6	6	5	Q3UP87	Q3UP87	Neutrophil elastase
Gls	3.32181	23.7155	23.5063	19.5176	21.0606	22.7326	0	9.3535	3	1	1	1	0	1	F6RDM4	F6RDM4
Sec23ip	3.31909	23.7947	23.6404	19.6767	21.1202	19.5861	0	7.6427	1	1	1	1	0	1	Q6NZC7;G3X928	Q6NZC7;G3X928	SEC23-interacting protein
Acsl1	3.31781	24.9838	24.6537	21.7394	21.2624	20.7575	0	11.882	6	4	4	4	2	2	P41216;D3Z041;D3YVF6;D3Z457	P41216;D3Z041	Long-chain-fatty-acid--CoA ligase 1
Cops2	3.31542	22.6801	22.7468	18.9209	19.8751	19.4668	0.0032374	2.255	2	2	2	2	1	2	P61202;A2AQE4	P61202;A2AQE4	COP9 signalosome complex subunit 2
Anxa1	3.31314	30.3935	31.401	27.3666	27.8016	27.6561	0	166.34	79	23	20	23	20	20	P10107;A0A494BBD8	P10107;A0A494BBD8	Annexin A1
Tamm41	3.3109	23.5798	23.4986	20.7756	19.6811	20.5548	0	3.1518	2	1	1	1	1	0	Q3TUH1;D6RGT1;G3UWL8;G5E881	Q3TUH1;D6RGT1;G3UWL8;G5E881	Phosphatidate cytidylyltransferase, mitochondrial
Adpgk	3.30819	26.0158	26.1579	23.474	22.0834	22.9948	0	28.361	9	5	5	5	4	3	Q3UDS7;A0A1L1SSF2;Q8VDL4	Q3UDS7;A0A1L1SSF2;Q8VDL4	ADP-dependent glucokinase
Ppp1r21	3.30573	22.909	22.3025	19.2103	19.3897	18.1138	0.0031983	2.1343	0	1	1	1	0	0	Q3TDD9	Q3TDD9	Protein phosphatase 1 regulatory subunit 21
H3f3a;H3f3c	3.30464	24.6549	24.6296	21.1078	21.5674	23.7831	0	27.033	18	1	1	1	1	1	P84244;P02301;E0CZ27	P84244;P02301;E0CZ27	Histone H3.3;Histone H3.3C;Histone H3
Mrps27	3.30172	23.8199	23.6591	21.7336	19.1419	20.4513	0.00074683	2.5932	2	1	1	1	1	0	Q8BK72	Q8BK72	28S ribosomal protein S27, mitochondrial
Rexo4	3.30154	23.7776	23.5301	18.9785	21.726	20.3131	0	2.9883	1	2	2	2	0	1	Q6PAQ4;A2ALB1;A2ALB2	Q6PAQ4;A2ALB1;A2ALB2	RNA exonuclease 4
Rpa2	3.29842	24.649	24.7121	21.3982	21.3661	22.0132	0	3.2658	2	2	2	2	1	1	Q62193;Q3TE40;F6V8R7	Q62193;Q3TE40;F6V8R7	Replication protein A 32 kDa subunit
Casp8	3.28846	24.0014	23.9508	20.8321	20.5432	20.3102	0	7.7714	3	3	3	3	2	2	O89110;A0A087WQT6	O89110;A0A087WQT6	Caspase-8;Caspase-8 subunit p18;Caspase-8 subunit p10
Nit2	3.28522	22.9039	22.7221	18.2705	20.785	19.9823	0	4.2558	1	1	1	1	0	1	Q9JHW2	Q9JHW2	Omega-amidase NIT2
Oas1a;Oas1g	3.27619	25.3213	25.075	21.88	21.964	22.3447	0	9.2109	5	3	3	3	1	1	P11928;Q8K469;Q05BJ7	P11928;Q8K469;Q05BJ7	2-5-oligoadenylate synthase 1A
Clic4	3.26878	28.3543	27.937	25.0501	24.7036	25.3957	0	93.495	40	13	13	13	10	10	Q9QYB1	Q9QYB1	Chloride intracellular channel protein 4
Ptpn12	3.26781	23.4464	23.458	18.704	21.6648	19.1471	0	3.8199	3	2	2	2	1	2	P35831	P35831	Tyrosine-protein phosphatase non-receptor type 12
Myg1	3.26539	22.7522	22.6397	19.787	19.0741	19.205	0.0055749	1.9313	1	1	1	1	1	0	Q9JK81;F7A3N3;F8WGG3	Q9JK81;F7A3N3;F8WGG3	UPF0160 protein MYG1, mitochondrial
Qdpr	3.26164	26.5414	26.6901	23.5752	23.133	23.9548	0	56.892	13	5	5	5	4	3	Q8BVI4;D3YWR7;A0A0G2JGY0;A0A0G2JGJ1;D3Z1A1;D3Z099	Q8BVI4;D3YWR7;A0A0G2JGY0;A0A0G2JGJ1	Dihydropteridine reductase
Strn3	3.26115	22.4365	21.4478	18.7704	18.5916	18.303	0	4.4026	1	2	2	1	1	1	Q9ERG2;B2RQS1	Q9ERG2;B2RQS1	Striatin-3
Lims1	3.25305	28.4338	28.3738	25.2871	25.0143	25.4611	0	22.17	25	9	9	9	6	7	Q99JW4	Q99JW4	LIM and senescent cell antigen-like-containing domain protein 1
Chil3	3.25073	32.0884	32.3034	28.9369	28.9534	29.0217	0	122.69	110	22	22	21	20	21	O35744;F6RU51	O35744	Chitinase-like protein 3
Arhgef7	3.24769	23.5123	23.5014	20.1368	20.3815	19.0371	0	5.5546	1	2	2	2	1	1	Q9ES28;D3Z0V2;A0A0R4J0X8	Q9ES28;D3Z0V2;A0A0R4J0X8	Rho guanine nucleotide exchange factor 7
Fn1	3.24008	26.997	26.911	23.4408	23.9871	21.3341	0	29.453	18	13	12	12	5	8	P11276;B7ZNJ1;A0A087WS56;B9EHT6;A0A087WSN6;Q3UHL6;A0A087WR50;A0A087WSU6;A0A087WS99	P11276;B7ZNJ1;A0A087WS56;B9EHT6;A0A087WSN6;Q3UHL6;A0A087WR50	Fibronectin;Anastellin
Ikbkb	3.22932	23.0785	22.9706	21.4187	18.1717	19.6222	0	15.221	2	2	2	2	2	1	Q3U141;A0A0R4J0T4;Q5D0E0;O88351	Q3U141;A0A0R4J0T4;Q5D0E0;O88351	Inhibitor of nuclear factor kappa-B kinase subunit beta
Marco	3.22897	24.8099	24.5816	22.4523	20.4813	21.2943	0	7.6395	3	2	2	2	2	1	Q60754	Q60754	Macrophage receptor MARCO
Ly6c2	3.22306	24.1595	26.4444	21.8081	22.3497	24.5053	0	10.798	3	2	1	2	2	2	P0CW03	P0CW03	Lymphocyte antigen 6C2
Ncf4	3.22094	26.4616	26.8687	23.7287	23.1597	23.5058	0	29.829	16	10	10	10	9	7	P97369;A8XU21	P97369;A8XU21	Neutrophil cytosol factor 4
Psmd14	3.21879	25.0116	24.4464	21.4837	21.5367	21.9942	0	10.899	6	3	2	2	1	1	O35593	O35593	26S proteasome non-ATPase regulatory subunit 14
Cd36	3.21555	27.7067	27.3859	24.1939	24.4676	24.7025	0	36.084	15	7	7	7	6	7	Q08857;A0A0G2JFB7	Q08857	Platelet glycoprotein 4
Adss	3.21358	25.5815	25.7593	22.0575	22.8562	22.5041	0	17.412	9	6	5	6	2	4	P46664	P46664	Adenylosuccinate synthetase isozyme 2
Edc4	3.2095	23.7019	23.8461	21.0543	20.0747	18.9777	0	4.4724	2	1	1	1	1	1	Q3UJB9;D6RE33;A0A0R4J1Q0;G5E896	Q3UJB9;D6RE33;A0A0R4J1Q0;G5E896	Enhancer of mRNA-decapping protein 4
Tlr9	3.20822	26.1917	25.3119	22.9731	22.1141	21.3511	0	14.595	10	6	6	6	4	3	Q9EQU3	Q9EQU3	Toll-like receptor 9
Itih4	3.20563	24.1399	23.1746	19.501	21.4023	19.4155	0	9.2853	6	4	4	3	2	2	A6X935;A0A2K6EDJ7;E9Q5L2;E9PVD2;CON__Q3T052	A6X935;A0A2K6EDJ7;E9Q5L2;E9PVD2	Inter alpha-trypsin inhibitor, heavy chain 4
Bre	3.20244	24.0524	23.8119	19.5444	21.915	20.9649	0	3.0067	4	2	2	2	1	2	Q8K3W0;D3Z7P0;E9Q8Q1;A0A0J9YV56;E9Q0U3	Q8K3W0;D3Z7P0;E9Q8Q1;A0A0J9YV56;E9Q0U3	BRCA1-A complex subunit BRE
Mpo	3.19808	32.1831	32.0861	28.9333	28.9397	27.8582	0	135.37	135	29	28	29	28	26	P11247;F7DC05	P11247	Myeloperoxidase;Myeloperoxidase light chain;Myeloperoxidase heavy chain
Dctn4	3.18712	22.3045	22.6756	19.8747	18.7312	19.0293	0	8.679	1	1	1	1	1	0	Q8CBY8	Q8CBY8	Dynactin subunit 4
Tf	3.1815	29.2624	28.2321	25.3832	25.7483	24.623	0	108.26	43	23	23	22	17	19	Q921I1;F7BAE9;E9Q2Q7;D3YYR8;F7CJN9;E9Q939	Q921I1	Serotransferrin
Timd4	3.17856	23.504	22.4629	20.4277	19.1821	20.3234	0.0018396	2.4602	2	1	1	1	1	1	Q6U7R4	Q6U7R4	T-cell immunoglobulin and mucin domain-containing protein 4
Rfc1	3.17619	22.9648	22.6617	19.7304	19.5437	18.1392	0	5.0063	4	2	2	2	1	1	P35601;Q5U4B1;A0A0N5E9G7;G3X8Z6;G3UWX1	P35601;Q5U4B1;A0A0N5E9G7;G3X8Z6;G3UWX1	Replication factor C subunit 1
Erbb2ip	3.17507	25.4993	24.8929	22.6143	21.4278	19.9618	0	13.78	6	4	4	4	3	2	Q80TH2;B2RUJ2;B7ZNX6	Q80TH2;B2RUJ2;B7ZNX6	Protein LAP2
Usmg5	3.17127	24.2403	24.0906	21.8329	20.1555	23.7188	0.0038773	2.0115	2	1	1	1	1	0	Q78IK2	Q78IK2	Up-regulated during skeletal muscle growth protein 5
Slc44a2	3.17119	26.2303	26.1491	23.4646	22.5724	22.4421	0	8.9998	6	3	3	3	3	2	Q8BY89;A0A1L1SVG6	Q8BY89;A0A1L1SVG6	Choline transporter-like protein 2
Mtx2	3.17111	23.5563	22.8284	20.0597	19.9827	20.8003	0	7.1824	2	2	2	2	1	1	O88441	O88441	Metaxin-2
Nub1	3.1709	23.3774	23.3652	20.3894	20.0114	19.7696	0	6.1561	5	2	2	2	1	1	P54729;A0A0G2JGQ4	P54729;A0A0G2JGQ4	NEDD8 ultimate buster 1
Kiaa0020	3.17045	24.5228	24.7545	20.5641	22.3723	20.7792	0	8.3268	3	4	3	4	1	3	Q8BKS9;A0A0N4SUH4;A0A494BB98;A0A494BBI7	Q8BKS9;A0A0N4SUH4	Pumilio domain-containing protein KIAA0020
Ankrd44	3.16862	25.3976	25.0118	22.0683	22.0038	20.7537	0	8.1061	6	5	5	4	3	3	B2RXR6;E9QNQ2;J3QK13;J3QK37;J3QNJ4	B2RXR6;E9QNQ2;J3QK13	Serine/threonine-protein phosphatase 6 regulatory ankyrin repeat subunit B
Eif6	3.16494	25.4547	25.45	22.2657	22.3091	23.4349	0	10.396	9	2	2	2	1	2	O55135;A6PWZ2	O55135;A6PWZ2	Eukaryotic translation initiation factor 6
Hnrnpk	3.16416	23.6761	23.5439	19.6343	21.2573	20.1023	0.0032006	2.1395	1	1	1	1	0	1	B2M1R6;H3BKD0;H3BKI8;H3BJS9;H3BLP7;Q8BT23	B2M1R6;H3BKD0;H3BKI8
Rrp1	3.16031	24.5505	24.002	21.1435	21.0885	20.929	0	22.542	4	3	3	3	2	2	P56183	P56183	Ribosomal RNA processing protein 1 homolog A
Trex1	3.15894	25.2009	25.137	21.5856	22.4344	22.3287	0	12.895	8	3	3	3	2	3	Q91XB0	Q91XB0	Three-prime repair exonuclease 1
Limd2	3.1558	26.1965	26.499	22.992	23.3918	24.3397	0	23.47	7	3	3	3	1	3	Q8BGB5	Q8BGB5	LIM domain-containing protein 2
Mup14;Mup8;Mup9;Mup19;Mup1;Mup13;Mup11;Mup4;Mup10;Mup17;Mup6;Mup7;Mup2;Mup15	3.1558	23.8089	21.7287	20.0213	19.2047	20.5302	0	4.0509	1	2	2	1	0	0	A2CEK7;P04938;A9C496;A9C497;Q4FZE8;A2AKN8;B8JI96;A2CEK6;A2BIN0;A2AKN9;A2BIN1;L7N222;B5X0G2;E9PVW0;A2BIM8;P02762;L7MUC7;Q58EV3;P11589;A2CEL1;A9R9W0;A2CEL0;E9QA79;P11588	A2CEK7;P04938;A9C496;A9C497;Q4FZE8;A2AKN8;B8JI96;A2CEK6;A2BIN0;A2AKN9;A2BIN1;L7N222;B5X0G2;E9PVW0;A2BIM8;P02762;L7MUC7;Q58EV3;P11589;A2CEL1;A9R9W0;A2CEL0;E9QA79;P11588	Major urinary proteins 11 and 8;Major urinary protein 17;Major urinary protein 6;Major urinary protein 2;Major urinary protein 1
Cetn2	3.15187	23.8759	23.3791	22.02	18.9313	21.7185	0	8.6018	3	2	2	2	2	1	Q9R1K9;Z4YJH1;B1AUQ7	Q9R1K9;Z4YJH1;B1AUQ7	Centrin-2
Atl3	3.15008	26.2631	25.9902	22.9719	22.9813	22.586	0	72.12	20	7	7	7	3	3	Q91YH5;E9PYT3;A0A494BAU1;A0A494BAX8;A0A494B9P1;A0A494BAW9	Q91YH5;E9PYT3	Atlastin-3
Inpp1	3.14848	25.2087	25.0291	21.1251	22.8157	22.2136	0	4.7286	6	2	2	2	1	2	P49442;E0CYQ4;E0CX64;H3BK26	P49442;E0CYQ4;E0CX64;H3BK26	Inositol polyphosphate 1-phosphatase
Pgm2	3.1477	26.1785	26.3039	23.2707	22.9164	22.3978	0	10.981	14	5	5	5	2	3	Q7TSV4;A0A0G2JG04	Q7TSV4	Phosphoglucomutase-2
Slc15a4	3.14736	25.8119	25.093	23.6186	20.9915	22.5385	0	9.148	4	2	2	2	2	1	Q91W98;D3Z4X0;A0A0G2JDS1	Q91W98;D3Z4X0;A0A0G2JDS1	Solute carrier family 15 member 4
Prkcsh	3.14717	28.1094	28.044	25.1523	24.7067	25.0632	0	35.361	26	11	10	10	9	9	O08795	O08795	Glucosidase 2 subunit beta
Fnbp4	3.14351	24.2244	23.7125	21.4347	20.2153	20.2985	0	3.8873	2	2	2	2	1	1	Q6ZQ03;A0A5F8MPU2;A0A0R4IZZ6	Q6ZQ03;A0A5F8MPU2;A0A0R4IZZ6	Formin-binding protein 4
Adam10	3.14022	24.2113	22.6313	20.3193	20.2428	19.441	0	3.5098	6	3	3	2	1	1	O35598;E9PYF2	O35598;E9PYF2	Disintegrin and metalloproteinase domain-containing protein 10
Uqcrq	3.13643	27.0488	26.896	23.7668	23.9052	25.5448	0	13.976	13	4	4	4	2	3	Q9CQ69	Q9CQ69	Cytochrome b-c1 complex subunit 8
Aip	3.13292	26.2117	26.2531	22.871	23.328	23.4832	0	22.211	12	8	7	6	3	4	O08915;D3YW40	O08915;D3YW40	AH receptor-interacting protein
Igfbp7	3.1323	26.7912	25.8733	23.1752	23.2246	23.3827	0	25.53	10	4	4	4	2	3	E9Q5D9;F8WH23;Q61581	E9Q5D9;F8WH23;Q61581	Insulin-like growth factor-binding protein 7
Lrpprc	3.12279	26.5649	26.055	23.2633	23.1111	21.0276	0	39.01	23	10	10	10	7	6	Q6PB66	Q6PB66	Leucine-rich PPR motif-containing protein, mitochondrial
Prrc1	3.1177	23.8286	23.8298	20.1132	21.3097	21.2991	0	12.407	8	3	2	2	2	2	Q3UPH1	Q3UPH1	Protein PRRC1
Ciapin1	3.10877	23.4094	23.7219	21.5341	19.3796	20.6044	0.00074432	2.5645	3	2	2	2	2	1	Q8WTY4;F7BWP1	Q8WTY4;F7BWP1	Anamorsin
Terf2	3.10544	24.3224	23.7524	20.9323	20.9316	20.4137	0.0062457	1.8917	1	2	2	2	1	1	O35144;E9QM06;D3YZ08;F6VIR4	O35144;E9QM06;D3YZ08;F6VIR4	Telomeric repeat-binding factor 2
Pam16	3.10503	24.9005	23.8295	21.7746	20.7453	22.8127	0	19.132	2	2	2	2	2	1	Q9CQV1;A0A1L1SQA2	Q9CQV1;A0A1L1SQA2	Mitochondrial import inner membrane translocase subunit TIM16
Raver1	3.10277	25.8895	26.5305	22.8471	23.3673	22.5956	0	18.03	11	6	6	6	3	4	Q9CW46;A0A1L1SRY4	Q9CW46;A0A1L1SRY4	Ribonucleoprotein PTB-binding 1
Gart	3.10092	26.7015	26.769	23.6406	23.628	22.3401	0	44.288	20	10	10	10	6	4	Q64737;D6RCG1;A0A338P6X4	Q64737	Trifunctional purine biosynthetic protein adenosine-3;Phosphoribosylamine--glycine ligase;Phosphoribosylformylglycinamidine cyclo-ligase;Phosphoribosylglycinamide formyltransferase
Lypla1	3.09729	25.7617	26.0275	22.1747	23.42	23.6143	0	11.176	9	3	3	3	3	3	P97823;D3YUG4;J3QP56;D3Z111;D3Z269	P97823;D3YUG4;J3QP56;D3Z111	Acyl-protein thioesterase 1
Ap1s1	3.0934	23.8315	23.573	20.0158	21.2019	21.5078	0	14.299	1	1	1	1	0	1	P61967	P61967	AP-1 complex subunit sigma-1A
Gaa	3.09312	25.9344	24.9148	21.7804	22.8826	21.3523	0	20.087	7	8	8	6	4	7	P70699;F6R5R5;F6VEG4;A2AFL3;A2AFL5	P70699	Lysosomal alpha-glucosidase
Sumo1	3.09165	25.1421	25.5849	23.1296	21.4142	23.7584	0	3.6495	3	2	2	2	2	1	P63166;A0A087WRQ4	P63166;A0A087WRQ4	Small ubiquitin-related modifier 1
Jak1	3.0878	22.6946	23.8469	20.0691	20.2968	18.5323	0	10.726	5	3	2	3	1	2	P52332;B1ASP2	P52332;B1ASP2	Tyrosine-protein kinase JAK1;Tyrosine-protein kinase
Irf5	3.08405	24.2375	24.1044	20.9622	21.2116	21.0118	0	6.1441	2	3	3	3	2	2	P56477;F6Z6C6;A0A0N4SVY5	P56477;F6Z6C6	Interferon regulatory factor 5
Ttn	3.07994	22.7968	22.6429	19.1486	20.1312	12.8354	0.0011062	2.4874	0	2	2	2	0	0	A2ASS6;A0A5K1VVQ1;E9Q8N1;E9Q8K5;A0A5K1VVQ9	A2ASS6;A0A5K1VVQ1;E9Q8N1;E9Q8K5;A0A5K1VVQ9	Titin
Erap1	3.07795	25.284	25.0389	22.8801	21.2868	20.7662	0	7.3525	5	4	4	4	4	2	Q9EQH2;A0A1Y7VNY4;A0A1Y7VMT6	Q9EQH2	Endoplasmic reticulum aminopeptidase 1
Hdac1	3.07757	26.0175	26.395	22.7492	23.5082	22.9918	0	10.359	11	4	4	4	3	4	O09106	O09106	Histone deacetylase 1
Adk	3.07467	25.4006	25.086	21.622	22.7153	22.1759	0	14.15	8	4	4	4	2	3	P55264;A0A286YCD7;A0A286YCN3	P55264;A0A286YCD7;A0A286YCN3	Adenosine kinase
Mcm4	3.07372	25.5253	25.0136	22.1153	22.2762	21.0595	0	11.954	6	6	6	5	3	3	P49717;A0A2R8VHP7	P49717	DNA replication licensing factor MCM4
Fasn	3.07315	27.0708	26.6579	24.015	23.5673	21.1586	0	45.785	23	16	16	14	13	11	P19096;A0A0U1RNJ1;A0A0U1RPP5	P19096;A0A0U1RNJ1	Fatty acid synthase;[Acyl-carrier-protein] S-acetyltransferase;[Acyl-carrier-protein] S-malonyltransferase;3-oxoacyl-[acyl-carrier-protein] synthase;3-oxoacyl-[acyl-carrier-protein] reductase;3-hydroxyacyl-[acyl-carrier-protein] dehydratase;Enoyl-[acyl-carrier-protein] reductase;Oleoyl-[acyl-carrier-protein] hydrolase
Pla2g4a	3.06991	25.2398	24.7094	22.0948	21.7145	20.9504	0	6.3376	2	4	4	4	3	3	P47713;Q9DBX5	P47713;Q9DBX5	Cytosolic phospholipase A2;Phospholipase A2;Lysophospholipase
Arpc5l	3.06682	27.3405	26.8671	24.0759	23.9982	25.1139	0	35.716	16	6	6	6	4	4	Q9D898	Q9D898	Actin-related protein 2/3 complex subunit 5-like protein
Itpr1	3.06421	23.689	23.6346	20.7484	20.4468	17.7278	0	7.031	1	2	2	2	1	1	P11881;A0A0N4SWH7	P11881;A0A0N4SWH7	Inositol 1,4,5-trisphosphate receptor type 1
Dtymk	3.05281	24.4221	23.8964	20.5891	21.6238	21.3546	0	3.589	4	2	2	2	1	2	P97930;D3Z3R3	P97930;D3Z3R3	Thymidylate kinase
Ceacam1	3.05017	24.0802	24.5789	21.4275	21.1313	21.344	0	19.418	2	1	1	1	1	1	P31809;Q3LFS6;Q3LFS9;Q3LFS5;Q925P3	P31809;Q3LFS6;Q3LFS9;Q3LFS5;Q925P3	Carcinoembryonic antigen-related cell adhesion molecule 1
Ube2o	3.0458	23.44	23.431	19.7926	20.9868	18.859	0.00038139	2.8516	2	2	2	2	1	2	Q6ZPJ3	Q6ZPJ3	E2/E3 hybrid ubiquitin-protein ligase UBE2O
Atp5l	3.04495	25.8752	25.8309	22.6846	22.9316	24.6968	0	5.9074	8	2	1	2	1	1	Q9CPQ8	Q9CPQ8	ATP synthase subunit g, mitochondrial
Cd180	3.04146	28.632	28.0701	25.5037	25.1156	25.0186	0	102.32	26	10	10	9	8	10	Q62192	Q62192	CD180 antigen
Vps29	3.04127	26.278	26.3164	23.2734	23.2385	24.1408	0	23.326	6	4	4	4	3	3	Q9QZ88;D3YYD5;D3Z645;D3YW98	Q9QZ88;D3YYD5;D3Z645;D3YW98	Vacuolar protein sorting-associated protein 29
Rtn3	3.04106	26.169	26.0336	23.5361	22.5844	21.9191	0	12.715	4	2	2	2	2	1	Q9ES97	Q9ES97	Reticulon-3
	3.03961	24.8054	25.0019	22.1615	21.5666	22.0755	0	26.996	2	2	2	2	2	1	A0A140LJ70;A0A140LHS4	A0A140LJ70;A0A140LHS4
Skiv2l2	3.03376	24.1585	24.4419	20.0429	22.49	19.6406	0	8.6974	3	3	2	3	0	1	Q9CZU3	Q9CZU3	Superkiller viralicidic activity 2-like 2
Slmap	3.0321	23.2859	21.0203	19.5672	18.6748	17.7511	0.0085499	1.7731	0	1	1	1	0	0	Q3URD3;F6UV57;F6YCM8;F8WIH0;D3Z7V3;H7BX64	Q3URD3;F6UV57;F6YCM8;F8WIH0;D3Z7V3;H7BX64	Sarcolemmal membrane-associated protein
Gbp5	3.03023	21.9782	22.3972	19.7238	18.5912	18.4688	0	3.6055	1	1	1	1	1	0	Q8CFB4;Q8BMN7	Q8CFB4;Q8BMN7	Guanylate-binding protein 5
Tbcb	3.02967	26.1284	25.8314	23.1551	22.7454	23.0675	0	17.486	7	5	5	5	3	3	Q9D1E6	Q9D1E6	Tubulin-folding cofactor B
Padi4	3.02507	25.7145	26.029	22.6415	23.0519	22.1412	0	45.762	8	5	5	5	4	4	Q9Z183;Q9Z184;E9QAM4	Q9Z183	Protein-arginine deiminase type-4
Lig3	3.02473	23.0695	22.3137	19.6129	19.7209	17.9857	0.0065789	1.8804	1	1	1	1	0	0	P97386;B1AT03;Q3UC82;Q80ZH7;K4DI59	P97386;B1AT03;Q3UC82;Q80ZH7;K4DI59	DNA ligase 3;DNA ligase
Ttll12	3.0244	24.0318	24.727	22.3678	20.3422	20.3746	0	10.207	5	4	2	3	4	1	Q3UDE2	Q3UDE2	Tubulin--tyrosine ligase-like protein 12
Sec22b	3.02236	26.7784	26.3201	23.2902	23.7635	24.15	0	19.627	10	5	5	5	4	4	O08547;E9Q6R3;A0A0G2JF08;D6RES2	O08547;E9Q6R3;A0A0G2JF08	Vesicle-trafficking protein SEC22b
Sp110	3.01901	26.3971	25.7874	22.7311	23.4153	22.538	0	18.154	12	5	5	4	2	2	Q8BVK9	Q8BVK9	Sp110 nuclear body protein
Thoc3	3.01849	20.8377	21.2846	17.7838	18.3015	18.18	0.00037936	2.7994	2	1	1	1	0	1	Q8VE80	Q8VE80	THO complex subunit 3
Yars	3.01298	26.4104	26.0473	23.5032	22.9285	22.1627	0	20.228	11	8	8	8	4	4	Q91WQ3;A2A7S7;F6VXZ2	Q91WQ3;A2A7S7	Tyrosine--tRNA ligase, cytoplasmic;Tyrosine--tRNA ligase, cytoplasmic, N-terminally processed;Tyrosine--tRNA ligase
Hnrnpul1	3.01247	25.3231	25.7851	22.1318	22.9516	21.658	0	16.46	7	5	3	5	2	3	Q8VDM6	Q8VDM6	Heterogeneous nuclear ribonucleoprotein U-like protein 1
Ctsg	3.01245	28.3809	28.4303	25.3791	25.4072	25.8739	0	32.938	32	7	7	7	7	7	P28293	P28293	Cathepsin G
Itgam	3.00177	27.6998	28.1581	24.6397	25.2147	23.3631	0	97.346	32	16	16	16	12	12	Q3U1U4;E9Q604;G5E8F1;E9Q5K8;A0A0R4J1B4;P05555;D6RJ73	Q3U1U4;E9Q604;G5E8F1;E9Q5K8;A0A0R4J1B4;P05555	Integrin alpha-M
Anp32b	3.00138	28.0902	28.2107	24.8413	25.4568	26.003	0	27.235	17	3	3	3	3	3	Q9EST5	Q9EST5	Acidic leucine-rich nuclear phosphoprotein 32 family member B
Lnpep	3.00124	24.9433	25.0501	22.1226	21.8683	20.5241	0	8.307	6	4	3	4	2	2	Q8C129	Q8C129	Leucyl-cystinyl aminopeptidase
Xpnpep1	2.99968	26.3261	26.2538	23.5322	23.0484	22.3751	0	16.381	14	7	7	7	6	5	Q6P1B1;Q3UE92;A0A494BBG8;S4R1I3;S4R228	Q6P1B1;Q3UE92;A0A494BBG8;S4R1I3	Xaa-Pro aminopeptidase 1
Ngp	2.9969	32.065	32.3428	28.9527	29.4613	29.9232	0	170.5	83	17	17	17	14	15	O08692	O08692	Neutrophilic granule protein
Dynlt1	2.99648	22.5915	22.6344	19.3431	19.8899	21.2014	0	4.7327	3	1	1	1	1	1	P51807;A0A338P7B7	P51807;A0A338P7B7	Dynein light chain Tctex-type 1
Sdcbp	2.99623	26.7954	26.093	23.5217	23.3742	24.4825	0	31.275	21	6	6	6	6	5	O08992;Q3TMX0;H3BLG5;A2AKJ9;A2AKJ6;A2AKJ5	O08992;Q3TMX0;H3BLG5;A2AKJ9;A2AKJ6	Syntenin-1
Ppp6c	2.99598	24.8711	24.8963	21.6381	22.1373	22.0565	0	7.4849	7	3	3	3	2	3	Q9CQR6;A0A0N4SVL9;A0A0N4SVE2	Q9CQR6;A0A0N4SVL9;A0A0N4SVE2	Serine/threonine-protein phosphatase 6 catalytic subunit;Serine/threonine-protein phosphatase 6 catalytic subunit, N-terminally processed
Ppid	2.99366	27.4174	27.4058	24.4662	24.3697	24.19	0	36.827	25	11	11	11	8	9	Q9CR16	Q9CR16	Peptidyl-prolyl cis-trans isomerase D
Ptpn11	2.99202	26.9079	26.7209	24.0233	23.6215	22.7416	0	32.589	15	7	7	7	6	5	P35235	P35235	Tyrosine-protein phosphatase non-receptor type 11
Pmpcb	2.99193	24.2288	23.051	20.6424	20.6535	20.3301	0	10.035	4	3	3	2	1	1	Q9CXT8	Q9CXT8	Mitochondrial-processing peptidase subunit beta
Ifitm3	2.99186	27.4878	26.8851	24.404	23.9851	26.3867	0	15.364	12	3	3	3	3	3	Q9CQW9;Q99J93;A0A1B0GT68	Q9CQW9	Interferon-induced transmembrane protein 3
Tomm22	2.99042	25.6049	25.3561	22.3911	22.589	23.8493	0	29.976	7	4	2	4	2	2	Q9CPQ3;A0A2R8VHJ4;A0A2R8VHM4	Q9CPQ3	Mitochondrial import receptor subunit TOM22 homolog
Ccdc58	2.99025	22.5025	21.9333	19.1765	19.2788	20.6065	0	5.7859	6	1	1	1	1	1	Q8R3Q6	Q8R3Q6	Coiled-coil domain-containing protein 58
Noc2l	2.9872	23.1	22.5657	19.4747	20.2166	19.1733	0	3.4266	1	1	1	1	1	1	J3QK52	J3QK52
Ahsg	2.98377	25.8785	23.4501	20.5041	22.857	22.8337	0.0038651	1.989	1	2	2	1	1	1	P29699;A0A338P6Y6;A0A338P703;A0A338P7G1;A0A338P7H5	P29699;A0A338P6Y6;A0A338P703;A0A338P7G1;A0A338P7H5	Alpha-2-HS-glycoprotein
Nfkb1	2.98217	26.9355	26.9926	24.1912	23.7725	22.5232	0	29.653	16	9	8	9	6	5	P25799;A0A0G2JGK6;V9GX90;F6Z9G5	P25799	Nuclear factor NF-kappa-B p105 subunit;Nuclear factor NF-kappa-B p50 subunit
Retnlg	2.97936	26.7065	27.2593	23.6024	24.4047	26.1847	0	6.0349	5	2	2	2	2	2	Q8K426	Q8K426
Serping1	2.97752	26.3285	25.4736	23.1268	22.7202	22.607	0	41.168	7	5	5	4	4	3	P97290;A2ATR8	P97290;A2ATR8	Plasma protease C1 inhibitor
G3bp1	2.96523	27.0867	26.717	24.0241	23.8491	23.627	0	36.419	18	8	8	8	7	8	P97855	P97855	Ras GTPase-activating protein-binding protein 1
Tgfb1i1	2.96368	22.9988	22.7428	20.8428	18.9714	19.3301	0	11.515	4	3	2	3	2	1	Q62219;E9Q1D5;E9PYQ1	Q62219;E9Q1D5	Transforming growth factor beta-1-induced transcript 1 protein
Gyg1;Gyg	2.9627	24.901	25.7585	22.4622	22.2719	23.1006	0	17.13	8	5	3	4	3	4	Q9R062;K3W4S6;V9GX26	Q9R062;K3W4S6;V9GX26	Glycogenin-1
Hmg20a	2.96228	21.5268	21.4947	19.1411	17.9559	18.8104	0.0085412	1.771	1	1	1	1	0	0	Q9DC33	Q9DC33	High mobility group protein 20A
Lgals9	2.95638	26.3706	26.2327	23.6641	23.0265	23.5751	0	6.6981	8	3	3	3	3	3	O08573;B1AQR8;G3X9T7	O08573;B1AQR8;G3X9T7	Galectin-9;Galectin
Lypla2	2.95552	27.3706	27.1772	24.5768	24.06	24.8694	0	28.932	20	6	6	6	5	4	Q9WTL7	Q9WTL7	Acyl-protein thioesterase 2
Sec24c	2.9555	24.8283	24.5429	21.1719	22.2882	20.5938	0	6.3765	3	3	3	2	2	2	G3X972;A0A286YDI8;A0A286YD08	G3X972;A0A286YDI8
Mrto4	2.94508	25.8056	25.5295	22.7124	22.7325	22.8495	0	11.885	6	4	4	4	3	3	A2AMV1;Q9D0I8	A2AMV1;Q9D0I8	mRNA turnover protein 4 homolog
Osbp	2.94248	24.5791	24.544	21.2756	21.9625	20.4209	0	4.6238	1	3	3	3	2	3	Q3B7Z2;Q5QNQ6;Q8K0C7;Q5QNQ4	Q3B7Z2	Oxysterol-binding protein 1
Cwc15	2.93975	22.2812	22.2769	20.4482	18.2305	20.4688	0	4.8246	1	1	1	1	1	0	Q9JHS9	Q9JHS9	Spliceosome-associated protein CWC15 homolog
Ankle2	2.93953	22.0518	21.3673	19.4578	18.0822	17.1086	0.00075245	2.6792	1	1	1	1	1	0	Q6P1H6	Q6P1H6	Ankyrin repeat and LEM domain-containing protein 2
Qil1	2.93544	25.1125	23.3631	22.3593	20.2454	24.0931	0	15.279	7	3	3	3	3	3	Q8R404	Q8R404	Protein QIL1
Atp2a2	2.93383	27.2608	27.0459	24.6191	23.82	22.7861	0	35.158	20	11	10	11	9	7	O55143	O55143	Sarcoplasmic/endoplasmic reticulum calcium ATPase 2
Maz	2.93199	25.9563	24.9445	22.5033	22.5335	22.6177	0	11.062	9	2	2	2	1	1	P56671;A0A0U1RNL1;F8VPK3;A0A0U1RNL9	P56671;A0A0U1RNL1;F8VPK3;A0A0U1RNL9	Myc-associated zinc finger protein
Ltbp1	2.93119	25.5113	24.6114	22.8893	21.3709	20.019	0	19.976	4	3	3	3	3	2	Q8CG19;A0A3Q4EGK3;B1B1E2	Q8CG19;A0A3Q4EGK3	Latent-transforming growth factor beta-binding protein 1
Cpa3	2.92865	22.9428	22.0081	19.8045	19.2891	19.0687	0.0059028	1.8951	1	1	1	1	1	0	P15089	P15089	Mast cell carboxypeptidase A
Eif3f	2.9275	26.4644	25.9349	23.1078	23.4366	23.4934	0	26.141	8	5	5	5	3	3	Q9DCH4	Q9DCH4	Eukaryotic translation initiation factor 3 subunit F
H2-DMb1	2.92642	27.6468	26.8573	24.4527	24.1986	25.1563	0	16.961	11	4	4	4	4	4	Q31094;P35737	Q31094;P35737	Class II histocompatibility antigen, M beta 1 chain
Gda	2.92416	26.1323	26.5757	23.7184	23.1413	22.8504	0	26.493	17	8	7	8	4	6	Q9R111;D3YU09;A0A494B982	Q9R111;D3YU09;A0A494B982	Guanine deaminase
Znf638;Zfml	2.92152	25.1966	24.6247	22.0728	21.9055	19.639	0	7.007	5	4	4	4	2	2	Q61464;A0A0N4SVM8;Q3TZK9;A0A0N4SV38;A0A0N4SVI8;E9QKZ7;A0A0N4SV80;E9QML5	Q61464;A0A0N4SVM8;Q3TZK9;A0A0N4SV38;A0A0N4SVI8;E9QKZ7;A0A0N4SV80;E9QML5	Zinc finger protein 638
Rbm26	2.92012	25.0146	24.1872	22.2823	21.0793	20.7585	0	8.0532	5	4	4	3	3	3	Q6NZN0;E9PUF4;E9Q640;E9PYZ7	Q6NZN0;E9PUF4;E9Q640;E9PYZ7	RNA-binding protein 26
Rap2a	2.91911	21.6976	21.1217	18.6245	18.3566	19.0298	0.0003811	2.8383	3	1	1	1	1	1	Q80ZJ1	Q80ZJ1	Ras-related protein Rap-2a
Coasy	2.91876	23.0515	23.0863	19.8764	20.4239	19.858	0	4.3343	3	1	1	1	0	1	Q9DBL7	Q9DBL7	Bifunctional coenzyme A synthase;Phosphopantetheine adenylyltransferase;Dephospho-CoA kinase
Alb	2.91782	32.4537	31.5068	29.1225	29.0023	27.9419	0	254.96	155	37	37	34	33	32	P07724	P07724	Serum albumin
Il4i1	2.91693	25.0338	24.5453	22.6876	21.0576	21.2593	0	8.3231	3	2	2	2	2	1	D3Z4E0;A0A0R4J0C2;O09046	D3Z4E0;A0A0R4J0C2;O09046	L-amino-acid oxidase
Mp68	2.91575	24.3849	24.0459	21.0839	21.5154	23.8207	0.0032386	2.257	2	1	1	1	1	1	A0A1Y7VLP0;P56379	A0A1Y7VLP0;P56379	6.8 kDa mitochondrial proteolipid
Fxr1	2.91553	23.677	24.1508	22.2824	19.7144	20.1464	0	5.0592	3	4	2	3	2	0	Q61584;A0A0H2UH27;A0A0G2JEP0	Q61584;A0A0H2UH27;A0A0G2JEP0	Fragile X mental retardation syndrome-related protein 1
Spns1	2.9139	23.0547	22.4361	20.0181	19.6449	20.1483	0	6.0597	1	1	1	1	1	1	Q8R0G7;D6REG2;A0A0U1RNZ2;D3YWA9;D3YTR6	Q8R0G7;D6REG2;A0A0U1RNZ2;D3YWA9;D3YTR6	Protein spinster homolog 1
Map2k2	2.91118	25.2866	24.9021	23.593	20.7734	22.0481	0	16.335	4	3	3	3	3	1	Q63932;Q91YS7;A0A1W2P7V9;M0QWN2	Q63932;Q91YS7	Dual specificity mitogen-activated protein kinase kinase 2
Xdh	2.90917	21.6408	22.8933	18.996	19.7198	17.8144	0	4.781	2	1	1	1	1	1	Q00519	Q00519	Xanthine dehydrogenase/oxidase;Xanthine dehydrogenase;Xanthine oxidase
Glrx5	2.90906	26.0706	25.8125	22.9934	23.0716	24.3197	0	18.638	5	2	2	2	2	2	Q80Y14;A0A1Y7VN70	Q80Y14;A0A1Y7VN70	Glutaredoxin-related protein 5, mitochondrial
Git2	2.90884	23.585	23.4874	20.7255	20.5292	19.6732	0.0032017	2.1434	1	1	1	1	1	1	Q9JLQ2	Q9JLQ2	ARF GTPase-activating protein GIT2
Exoc3	2.90617	24.6031	24.3255	21.8678	21.2485	20.5254	0.0038924	2.0753	1	2	2	2	2	2	Q6KAR6	Q6KAR6	Exocyst complex component 3
Cnpy3	2.906	25.3019	23.7833	21.6833	21.5899	21.8059	0	15.761	4	2	2	1	2	1	Q9DAU1	Q9DAU1	Protein canopy homolog 3
Psat1	2.90414	24.5623	24.5483	21.6415	21.6608	21.4143	0	6.697	2	3	3	3	2	2	Q99K85;E9Q6P1;Q3U6K9	Q99K85	Phosphoserine aminotransferase
Eci1	2.9038	27.7464	27.2922	24.7046	24.5264	24.5463	0	27.02	12	4	4	4	4	4	P42125;A0A3Q4EC00;A0A452J8A5	P42125;A0A3Q4EC00;A0A452J8A5	Enoyl-CoA delta isomerase 1, mitochondrial
Prkar2b	2.90343	26.4091	26.0413	24.5925	22.0511	22.9611	0	17.488	6	5	5	5	4	1	P31324;H3BK84;P12367;A0A0A6YX73;Q8K1M3	P31324;H3BK84	cAMP-dependent protein kinase type II-beta regulatory subunit
Aprt	2.90034	25.822	25.9173	23.2557	22.6829	23.4701	0	17.763	12	7	6	7	6	4	P08030;A0A1D5RLR6	P08030	Adenine phosphoribosyltransferase
Cd2bp2	2.89876	21.4997	21.3845	18.438	18.6488	18.8583	0	3.2669	2	1	1	1	0	0	Q9CWK3;A0A0U1RP07;A0A0U1RNG1	Q9CWK3;A0A0U1RP07;A0A0U1RNG1	CD2 antigen cytoplasmic tail-binding protein 2
H2-Aa	2.89875	29.7335	29.3168	26.7598	26.493	27.7206	0	29.142	21	4	4	4	4	4	P14438;P14434;G3UWR9;P14437;P14436;P14435;P23150;P04228;P01910;P04227	P14438;P14434;G3UWR9;P14437;P14436;P14435;P23150;P04228;P01910	H-2 class II histocompatibility antigen, A-U alpha chain;H-2 class II histocompatibility antigen, A-B alpha chain;Beta-2-microglobulin;H-2 class II histocompatibility antigen, A-S alpha chain;H-2 class II histocompatibility antigen, A-R alpha chain;H-2 class II histocompatibility antigen, A-F alpha chain;H-2 class II histocompatibility antigen, I-E alpha chain;H-2 class II histocompatibility anti…
Ttyh3	2.8982	22.327	21.7703	19.7611	18.5398	19.021	0	4.446	2	1	1	1	1	1	Q6P5F7	Q6P5F7	Protein tweety homolog 3
Stoml2	2.89719	26.5461	26.5134	23.2109	24.0542	23.549	0	43.341	15	7	6	7	4	6	Q99JB2;A2AG41;A2AG39;F6WI02	Q99JB2;A2AG41;A2AG39;F6WI02	Stomatin-like protein 2, mitochondrial
Ckap5	2.89589	24.6034	24.6393	21.71	21.7409	19.0754	0	8.8808	7	5	4	5	3	3	A2AGT5;Z4YL78;A0A0R4J0K2;K3W4R5	A2AGT5;Z4YL78;A0A0R4J0K2;K3W4R5	Cytoskeleton-associated protein 5
Ttc38	2.89504	22.7238	22.5476	19.4956	19.9857	18.938	0.0085881	1.7987	1	1	1	1	0	0	A3KMP2	A3KMP2	Tetratricopeptide repeat protein 38
Adsl	2.89415	26.73	26.1943	23.5674	23.5686	23.0811	0	23.921	16	6	6	6	3	3	P54822;E9Q242;E9Q3T7;A0A140LHU1;E9Q0A0	P54822;E9Q242;E9Q3T7	Adenylosuccinate lyase
Commd9	2.88978	23.0445	23.3112	20.3294	20.2468	20.6655	0	13.492	6	2	2	2	2	2	Q8K2Q0	Q8K2Q0	COMM domain-containing protein 9
Rnf126	2.88922	23.117	23.7229	20.3494	20.712	21.6318	0.00074102	2.5301	1	1	1	1	1	1	Q91YL2	Q91YL2	E3 ubiquitin-protein ligase RNF126
Mrps7	2.88694	23.759	23.222	21.2115	19.9956	21.01	0	10.244	3	2	2	2	2	2	Q80X85	Q80X85	28S ribosomal protein S7, mitochondrial
Gpd1l	2.8839	26.3579	26.3189	23.6669	23.2422	23.0002	0	10.993	9	4	4	4	3	3	Q3ULJ0;D3Z0L6	Q3ULJ0	Glycerol-3-phosphate dehydrogenase 1-like protein
Mpeg1	2.88242	31.0474	29.9947	27.9146	27.3627	26.9833	0	90.218	61	17	17	16	15	11	E9QN37;A1L314	E9QN37;A1L314	Macrophage-expressed gene 1 protein
Ttr	2.88223	30.6781	29.9285	27.8077	27.0344	28.728	0	30.471	24	5	5	5	5	5	P07309	P07309	Transthyretin
Phpt1	2.88094	25.8658	25.7591	22.8197	23.0434	23.8275	0	9.1929	13	3	3	3	2	2	Q9DAK9	Q9DAK9	14 kDa phosphohistidine phosphatase
Ppp2r1b	2.87998	23.3242	22.9941	19.8796	20.6787	19.4509	0.0025399	2.3222	2	1	1	1	1	1	Q7TNP2;H3BIV7;H3BLQ0;Q3TTF6;H3BKU1;G3UWS4;H3BLE7	Q7TNP2;H3BIV7;H3BLQ0;Q3TTF6;H3BKU1;G3UWS4;H3BLE7	Serine/threonine-protein phosphatase 2A 65 kDa regulatory subunit A beta isoform
Arrb2	2.87837	25.5413	25.371	22.0284	23.1272	22.2626	0	13.542	6	4	4	4	2	3	Q91YI4;Q5F2D9;J3QNV6	Q91YI4;Q5F2D9	Beta-arrestin-2
Ppp1r14a	2.87719	25.2392	24.914	22.4271	21.9718	23.949	0	35.056	9	4	4	4	4	3	Q91VC7;A0A140LI58	Q91VC7;A0A140LI58	Protein phosphatase 1 regulatory subunit 14A
Trim26	2.87679	20.8321	19.7977	17.7457	17.1305	16.8281	0	4.2821	1	1	1	1	1	1	Q99PN3;B8JJ53;B8JJ57;B8JJ56;J3QN94	Q99PN3;B8JJ53;B8JJ57;B8JJ56;J3QN94	Tripartite motif-containing protein 26
Zbtb7a	2.87466	22.2674	22.43	19.9683	18.9797	19.0907	0	5.0248	3	1	1	1	1	0	O88939;D3YZI8;D3YVF8;D3Z4C3	O88939;D3YZI8;D3YVF8;D3Z4C3	Zinc finger and BTB domain-containing protein 7A
Csnk2a1	2.87419	25.9306	25.5392	22.5601	23.1613	22.7648	0	12.435	11	4	4	4	2	3	Q60737	Q60737	Casein kinase II subunit alpha
Aars	2.87082	26.7509	26.4028	23.8039	23.6081	22.0988	0	46.127	24	11	11	10	8	9	Q8BGQ7	Q8BGQ7	Alanine--tRNA ligase, cytoplasmic
Kng1;Kng2	2.86888	23.6531	21.9749	19.1494	20.7408	19.2302	0.00073964	2.5228	2	2	2	1	0	1	O08677;D3YTY9;A0A0R4J038;Q6S9I3;Q6S9I2;A0A338P699;Q6S9I0	O08677;D3YTY9;A0A0R4J038;Q6S9I3;Q6S9I2;A0A338P699;Q6S9I0	Kininogen-1;Kininogen-1 heavy chain;Bradykinin;Kininogen-1 light chain
Igkv10-95	2.86883	23.4108	22.2956	20.0077	19.961	22.4638	0	7.4236	0	1	1	1	1	0	A0A075B5L0;P01647;P01645;P01644;P01643	A0A075B5L0;P01647;P01645;P01644;P01643	Ig kappa chain V-V region HP 124E1;Ig kappa chain V-V region HP 93G7;Ig kappa chain V-V region HP R16.7;Ig kappa chain V-V region MOPC 173
Idh3g	2.86861	24.8098	24.6107	22.6549	21.0284	21.8389	0	23.583	4	3	3	3	3	2	P70404	P70404	Isocitrate dehydrogenase [NAD] subunit gamma 1, mitochondrial
Vmp1	2.86831	22.8193	22.9054	20.45	19.538	20.5973	0	6.675	3	2	2	2	2	1	Q99KU0;Q5SXR2	Q99KU0;Q5SXR2	Vacuole membrane protein 1
Nudc	2.86316	27.644	27.3029	24.4016	24.819	24.2776	0	19.885	18	10	9	9	6	8	O35685	O35685	Nuclear migration protein nudC
Trim14	2.86207	25.2627	24.8472	21.9541	22.4316	21.6125	0	11.624	4	5	4	4	3	4	Q8BVW3	Q8BVW3	Tripartite motif-containing protein 14
Rgs3	2.8606	24.1745	23.911	21.1989	21.1655	19.5337	0	6.6376	6	2	2	2	1	1	Q9DC04;Q542M0;F6X4A2	Q9DC04;Q542M0;F6X4A2	Regulator of G-protein signaling 3
Chmp2a	2.85754	24.7987	24.9418	21.1903	22.8351	22.9172	0	6.8792	2	2	2	2	1	2	Q9DB34;A0A1B0GT75;A0A1B0GR63	Q9DB34;A0A1B0GT75;A0A1B0GR63	Charged multivesicular body protein 2a
Hook3	2.85746	22.6658	22.815	19.1614	20.6044	18.7683	0	4.751	1	2	2	2	0	1	Q8BUK6;F6W1A2	Q8BUK6;F6W1A2	Protein Hook homolog 3
Eif3b	2.85657	27.1639	27.133	24.524	24.0598	23.128	0	58.038	20	9	8	9	7	6	Q8JZQ9;A0A0G2JG48	Q8JZQ9	Eukaryotic translation initiation factor 3 subunit B
Cc2d1b	2.85595	24.0582	23.5844	20.9211	21.0096	19.7772	0	8.9207	3	2	2	2	1	1	Q8BRN9;F6XC25	Q8BRN9;F6XC25	Coiled-coil and C2 domain-containing protein 1B
Sash1;Samsn1	2.85469	24.4456	24.5711	20.938	22.3694	19.6521	0	5.8803	2	2	2	2	1	2	P59808;F8VQK5;P57725	P59808;F8VQK5;P57725	SAM and SH3 domain-containing protein 1;SAM domain-containing protein SAMSN-1
Tpt1	2.85279	28.8856	28.7125	26.1478	25.7447	27.4051	0	26.594	21	4	4	4	4	4	P63028;D3YU75	P63028;D3YU75	Translationally-controlled tumor protein
Dnaja2	2.85234	27.6719	27.4967	24.5888	24.8752	24.3151	0	68.101	42	12	12	11	10	11	Q9QYJ0	Q9QYJ0	DnaJ homolog subfamily A member 2
Gp5	2.85142	26.1452	25.5166	23.0651	22.8938	22.4044	0	15.829	8	4	4	4	4	4	Q9QZU3;O08742	Q9QZU3;O08742	Platelet glycoprotein V
Atad3;Atad3a	2.85054	25.7013	25.2473	23.0072	22.2403	21.639	0	9.1348	5	3	3	3	3	2	Q925I1;H3BK90;H3BKI6	Q925I1;H3BK90	ATPase family AAA domain-containing protein 3
Isca2	2.84616	22.3096	22.0053	19.1991	19.4235	20.0309	0	4.1703	1	2	2	1	1	1	A0A1Y7VK19;Q9DCB8	A0A1Y7VK19;Q9DCB8	Iron-sulfur cluster assembly 2 homolog, mitochondrial
Angpt1	2.84509	23.6905	23.052	20.5604	20.4919	19.6832	0	3.3621	0	1	1	1	1	1	O08538	O08538	Angiopoietin-1
Dock11	2.84379	24.3441	24.4777	21.0757	22.0585	18.7403	0	8.3405	5	3	3	3	1	2	A2AF47;A2AF67	A2AF47	Dedicator of cytokinesis protein 11
F11r	2.8418	25.887	25.4255	23.0208	22.6081	23.2775	0	8.46	6	4	4	4	3	2	O88792	O88792	Junctional adhesion molecule A
Lbp	2.84146	24.0723	21.634	19.5309	20.4926	20.1672	0	4.0377	3	2	2	2	0	1	Q61805;A2AC65;F6XKX9	Q61805;A2AC65;F6XKX9	Lipopolysaccharide-binding protein
Nploc4	2.84098	24.0014	24.2283	21.1922	21.3555	20.4006	0	13.572	6	3	3	3	2	2	P60670	P60670	Nuclear protein localization protein 4 homolog
Pi4k2a	2.84083	24.8288	24.4484	22.4584	21.1371	21.1018	0	3.4411	2	3	3	3	3	2	Q2TBE6;A0A494BBQ4	Q2TBE6;A0A494BBQ4	Phosphatidylinositol 4-kinase type 2-alpha
Vti1b	2.84051	27.9458	27.9274	24.996	25.1962	25.5406	0	51.187	17	7	5	6	5	5	O88384;Q91XH6;F6UHS3;E0CYE5;F6T4B9	O88384;Q91XH6;F6UHS3	Vesicle transport through interaction with t-SNAREs homolog 1B
Itga2	2.84034	26.6118	26.3252	23.631	23.6252	22.2039	0	30.906	16	8	8	8	6	6	Q62469;A0A286YCM1	Q62469	Integrin alpha-2
Prpf40a	2.83746	26.7548	26.0059	23.9523	23.1335	22.4892	0	15.547	11	7	7	5	5	3	Q9R1C7;A0A1B0GRU8;A0A6Q6PUT5	Q9R1C7;A0A1B0GRU8;A0A6Q6PUT5	Pre-mRNA-processing factor 40 homolog A
Eprs	2.83538	27.6483	27.6348	24.9627	24.6497	22.4395	0	75.672	33	18	17	16	11	11	Q8CGC7	Q8CGC7	Bifunctional glutamate/proline--tRNA ligase;Glutamate--tRNA ligase;Proline--tRNA ligase
Rps29	2.8339	24.878	25.2842	22.3807	22.1137	25.2837	0	3.2841	3	2	1	2	1	1	P62274	P62274	40S ribosomal protein S29
H2-DMb2	2.83028	25.2345	25.0365	22.7009	21.9095	23.013	0	9.0874	6	2	1	2	2	2	Q31099	Q31099
D10Jhu81e	2.83024	28.5431	27.8529	25.3928	25.3427	25.7233	0	39.819	21	7	7	6	5	5	Q9D172;A0A1W2P7B6;A0A1W2P870	Q9D172;A0A1W2P7B6	ES1 protein homolog, mitochondrial
Rpl21	2.82897	27.6	27.0276	25.2382	23.7314	25.9677	0	10.144	9	4	4	4	4	3	O09167;Q9CQM8	O09167;Q9CQM8	60S ribosomal protein L21
Ptprj	2.82885	26.6098	26.3771	24.1308	23.1983	21.9964	0	36.97	16	9	8	8	7	6	Q64455;A2AWF8;A2AWF9;E9Q4S7	Q64455;A2AWF8;A2AWF9;E9Q4S7	Receptor-type tyrosine-protein phosphatase eta;Protein-tyrosine-phosphatase
Rbm3	2.82847	27.5707	27.661	24.583	24.9917	25.8083	0	46.02	14	4	4	4	2	3	O89086;Q8BG13;S4R2M6	O89086;Q8BG13;S4R2M6	RNA-binding protein 3
Sec11a	2.82742	25.5325	24.9385	22.3581	22.4581	23.1305	0	10.509	9	5	5	5	5	4	Q9R0P6;D3YWT0;D3Z569;D3YTS1	Q9R0P6;D3YWT0;D3Z569;D3YTS1	Signal peptidase complex catalytic subunit SEC11A;Signal peptidase complex catalytic subunit SEC11
Ppm1g	2.8264	24.8282	24.8947	22.4554	21.6147	21.5361	0	6.7234	5	3	3	3	2	1	Q61074;A0A0J9YVG0;A0A0J9YV96	Q61074;A0A0J9YVG0	Protein phosphatase 1G
Gba	2.82131	27.5837	26.6398	24.5381	24.0428	23.8482	0	44.811	20	11	11	10	8	7	P17439;A0A0G2JDK2	P17439;A0A0G2JDK2	Glucosylceramidase
2011-09-01	2.81829	26.3356	26.1377	23.8917	22.945	22.9812	0	16.842	9	4	4	4	3	3	Q8C1B7;A0A0J9YTY0;A0A0J9YUL3;A0A0J9YUV6;A0A0J9YVA6;Q8CHH9;B1AQZ0;B7ZC46;B1AQY9	Q8C1B7;A0A0J9YTY0;A0A0J9YUL3	Septin-11
Ostc	2.81783	24.9515	24.6414	22.1604	21.7969	23.4116	0	9.2546	4	1	1	1	1	1	Q78XF5	Q78XF5	Oligosaccharyltransferase complex subunit OSTC
Mapk9	2.81697	20.5376	20.4298	18.0804	17.2532	17.293	0.00037922	2.7975	2	1	1	1	1	0	Q9WTU6	Q9WTU6	Mitogen-activated protein kinase 9
Ppif	2.81462	28.0233	27.6663	25.1424	24.918	25.3463	0	65.288	23	6	6	6	5	6	Q99KR7	Q99KR7	Peptidyl-prolyl cis-trans isomerase F, mitochondrial
Xpo1	2.81398	25.758	25.9621	23.0686	23.0236	21.3272	0	22.793	12	7	5	7	5	4	Q6P5F9;A2AKT6	Q6P5F9	Exportin-1
Sf3b4	2.81161	25.6826	25.3472	22.3118	23.0948	22.7221	0	33.028	9	5	5	5	4	3	Q8QZY9	Q8QZY9	Splicing factor 3B subunit 4
Gng5	2.81015	26.4677	25.9311	23.3569	23.4216	25.4135	0	12.055	7	2	2	2	1	2	Q80SZ7;D3Z7Q3	Q80SZ7;D3Z7Q3	Guanine nucleotide-binding protein G(I)/G(S)/G(O) subunit gamma-5;Guanine nucleotide-binding protein subunit gamma
Rab35	2.80831	23.7987	23.499	21.3792	20.3018	21.2758	0	4.7916	1	1	1	1	1	1	Q6PHN9	Q6PHN9	Ras-related protein Rab-35
Mical1	2.8082	26.8129	26.9358	24.4416	23.6907	22.5196	0	35.451	17	12	10	11	8	4	Q8VDP3;E9PUI4;D3Z5P6	Q8VDP3;E9PUI4	Protein-methionine sulfoxide oxidase MICAL1
Max	2.80799	23.4516	23.1923	18.7575	22.2704	21.3165	0.00074184	2.5363	1	1	1	1	0	1	P28574;A0A1W2P7P4	P28574;A0A1W2P7P4	Protein max
S100a9	2.80743	31.8853	32.7073	29.1893	29.7884	30.736	0	56.899	87	7	7	7	7	7	P31725	P31725	Protein S100-A9
Lpcat2	2.80542	22.8963	23.0226	19.5583	20.7497	19.3014	0.0042135	1.979	1	1	1	1	0	1	Q8BYI6	Q8BYI6	Lysophosphatidylcholine acyltransferase 2
Parvb	2.80466	28.7686	28.2706	25.9435	25.4864	25.4116	0	55.887	25	7	7	7	7	7	Q9ES46	Q9ES46	Beta-parvin
Ubap2l	2.80455	26.8947	26.5423	23.8361	23.9919	22.9669	0	28.137	13	7	7	7	5	5	Q80X50;A0A0H2UH17;A0A0G2JDV6;A0A0G2JG47;A0A0G2JDT1;A0A0G2JGD0;A0A0G2JFN7	Q80X50;A0A0H2UH17;A0A0G2JDV6	Ubiquitin-associated protein 2-like
Atg7	2.80361	23.4082	23.5737	20.7934	20.5812	19.4012	0	5.4735	2	3	3	3	2	2	Q9D906;A0A0A0MQN4;S4R2P7;S4R1T0;S4R2D5;S4R2T5;S4R1N8	Q9D906;A0A0A0MQN4;S4R2P7;S4R1T0;S4R2D5;S4R2T5	Ubiquitin-like modifier-activating enzyme ATG7
S100a8	2.80272	31.7211	32.7177	29.3197	29.5137	31.1652	0	121.68	92	5	5	5	5	4	P27005	P27005	Protein S100-A8
Vars	2.80159	28.835	28.6697	26.1519	25.7496	24.0669	0	94.234	47	22	21	19	16	14	Q9Z1Q9;G3UY93;G3UZ22;G3UYW2	Q9Z1Q9;G3UY93	Valine--tRNA ligase
Cecr5	2.79635	22.5992	22.0451	18.5872	20.4643	19.0724	0	3.3433	1	1	1	1	0	1	Q91WM2	Q91WM2	Cat eye syndrome critical region protein 5 homolog
Nsun2	2.796	25.6588	25.5735	23.266	22.3743	21.4272	0	26.236	11	9	7	9	6	4	Q1HFZ0;H3BKN0;H3BJF3	Q1HFZ0;H3BKN0	tRNA (cytosine(34)-C(5))-methyltransferase
Rab27a	2.79547	24.9613	24.9975	22.5097	21.8582	22.4779	0	6.4114	3	3	3	3	3	3	Q9ERI2	Q9ERI2	Ras-related protein Rab-27A
Tjp2	2.79531	22.5283	21.7799	18.9703	19.7473	17.4898	0	3.4755	1	2	2	2	1	2	Q9Z0U1;A0A3B2WBH9;A0A3B2WCN9	Q9Z0U1;A0A3B2WBH9;A0A3B2WCN9	Tight junction protein ZO-2
Rad21	2.79485	24.2741	24.4278	21.279	21.8332	20.8499	0	14.054	4	3	3	3	1	3	Q61550;A0A2I3BS25	Q61550	Double-strand-break repair protein rad21 homolog
Prkca	2.79298	26.1508	25.7275	23.6173	22.675	22.1124	0	23.185	10	3	3	3	3	3	Q4VA93	Q4VA93	Protein kinase C
Ubxn1	2.7908	25.4538	25.305	23.1231	22.0541	22.6815	0	12.201	6	3	3	3	3	2	Q922Y1;A0A498WFS2	Q922Y1;A0A498WFS2	UBX domain-containing protein 1
Apobr	2.78839	27.3876	27.7562	24.6706	24.8964	23.2232	0	92.561	23	16	14	16	10	9	Q8VBT6;A0A0U1RNM0;A0A0U1RNE8;A0A0U1RPR7	Q8VBT6	Apolipoprotein B receptor
Napsa	2.78781	28.4568	27.8389	24.6845	26.0355	25.9321	0	36.207	19	4	4	4	4	4	O09043	O09043	Napsin-A
Nrgn	2.78439	24.8996	24.5235	22.1257	21.7286	23.9195	0	8.4898	4	1	1	1	1	1	P60761	P60761	Neurogranin;NEUG(55-78)
Naa10;Naa11;Gm16286	2.7843	24.8485	24.4906	21.7102	22.0603	21.9692	0.0032131	2.1795	2	1	1	1	1	1	Q9QY36;Q3UX61;B1AUY9;B1AUZ1;Q9CQX6;B1AUY8;Q3V4D5;B1AUY7	Q9QY36;Q3UX61;B1AUY9;B1AUZ1;Q9CQX6;B1AUY8;Q3V4D5;B1AUY7	N-alpha-acetyltransferase 10;N-alpha-acetyltransferase 11
Eif3l	2.784	26.5504	26.2904	23.7815	23.4913	22.764	0	49.087	18	8	8	8	6	7	Q8QZY1;A0A2R8VH97	Q8QZY1	Eukaryotic translation initiation factor 3 subunit L
Gtpbp1	2.78293	25.3657	25.0148	22.3144	22.5002	21.4888	0	14.853	7	4	4	4	3	3	O08582;A0A2R8W725;A0A2R8VHC2	O08582	GTP-binding protein 1
Ly86	2.7807	25.8814	25.2418	22.8722	22.6896	24.4668	0	15.355	6	2	2	2	2	2	O88188	O88188	Lymphocyte antigen 86
Ca1	2.78017	28.8519	28.2914	25.5665	26.0164	25.9862	0	31.472	17	9	9	9	7	8	P13634;D3YYQ4	P13634	Carbonic anhydrase 1
Usp14	2.77982	26.2384	26.2225	23.3992	23.502	22.7828	0	32.288	11	7	7	7	3	5	Q9JMA1;E9PYI8	Q9JMA1;E9PYI8	Ubiquitin carboxyl-terminal hydrolase 14;Ubiquitin carboxyl-terminal hydrolase
Wdfy4	2.77909	29.0543	28.8932	26.2148	26.1746	22.9432	0	123.53	54	25	24	25	18	21	E9Q2M9;E9PV60;F6X8K3;E0CXD5	E9Q2M9;E9PV60
Gfpt1	2.77565	26.0238	25.6231	23.2102	22.8854	21.6071	0	11.602	9	5	5	5	4	4	P47856;D3YYD9;D3YYE0	P47856	Glutamine--fructose-6-phosphate aminotransferase [isomerizing] 1
Isoc2a	2.77534	26.2331	26.1228	23.5875	23.2178	24.2072	0	28.218	15	5	5	5	5	5	P85094	P85094	Isochorismatase domain-containing protein 2A, mitochondrial
Commd1;Gm28048	2.77483	21.411	21.3927	19.105	18.149	20.0238	0	6.1856	2	1	1	1	1	1	Q8K4M5;F7BCN0;F7BZY0	Q8K4M5;F7BCN0;F7BZY0	COMM domain-containing protein 1
Ilf2	2.77382	25.556	22.9345	22.0106	20.9323	21.674	0	19.304	11	5	5	2	3	2	Q9CXY6	Q9CXY6	Interleukin enhancer-binding factor 2
Nadk	2.77347	23.6446	23.814	21.3543	20.5574	21.235	0	6.0228	1	1	1	1	1	1	P58058	P58058	NAD kinase
Ssr1	2.77309	27.5082	27.3139	24.9613	24.3146	25.2935	0	19.198	11	4	4	3	3	2	Q9CY50;A0A286YDB7;A0A286YCT4;A0A286YCG8	Q9CY50;A0A286YDB7;A0A286YCT4;A0A286YCG8	Translocon-associated protein subunit alpha
Dock5	2.77195	21.7737	21.8633	19.4033	18.6898	16.422	0	6.7717	4	3	2	3	2	2	B2RY04	B2RY04	Dedicator of cytokinesis protein 5
Mta2	2.77087	25.7643	26.0715	23.6185	22.6756	21.6403	0	13.941	10	7	6	6	4	2	Q9R190;Q924K8;H3BLE1;Q3U3A7;E9Q794;Q3UII8;Q8K4B0;F8WHY8;E9PX23	Q9R190	Metastasis-associated protein MTA2
4921506M07Rik	2.77051	22.4059	22.5613	18.4806	20.9456	16.8564	0.0079392	1.8425	1	1	1	1	0	0	G3UYY4	G3UYY4
Baz1b	2.77037	26.6792	26.2452	23.6798	23.7039	21.3883	0	25.885	15	12	11	11	7	6	Q9Z277	Q9Z277	Tyrosine-protein kinase BAZ1B
Mif	2.76751	28.6769	28.3951	25.8304	25.7065	27.1549	0	35.768	20	6	5	5	5	4	P34884	P34884	Macrophage migration inhibitory factor
Vac14	2.76231	24.325	24.0843	21.4863	21.3984	20.0151	0	3.3964	3	2	2	2	1	1	Q80WQ2;A0A1D5RLY2	Q80WQ2;A0A1D5RLY2	Protein VAC14 homolog
Uqcr10	2.76027	26.7546	26.3085	23.6515	23.891	25.7458	0	4.4122	4	1	1	1	1	1	Q8R1I1	Q8R1I1	Cytochrome b-c1 complex subunit 9
Spag9	2.75712	23.177	22.8915	20.7855	19.7688	18.1849	0	4.4607	4	2	2	2	2	1	Q58A65;A0A0R4J196;F8WH31;E9PUD1;F6WNT4;F6SH61;Z4YMB8	Q58A65;A0A0R4J196;F8WH31;E9PUD1;F6WNT4;F6SH61;Z4YMB8	C-Jun-amino-terminal kinase-interacting protein 4
Dnaja3	2.75587	24.0443	23.4816	20.9574	21.0568	20.401	0.00074934	2.6438	3	1	1	1	1	1	Q99M87	Q99M87	DnaJ homolog subfamily A member 3, mitochondrial
Pdcd6	2.75568	25.8871	25.7734	23.1406	23.0086	23.5713	0	24.456	12	5	5	5	5	5	P12815	P12815	Programmed cell death protein 6
Fech	2.75481	26.5007	25.6591	23.1355	23.5146	22.6897	0	17.056	8	6	6	6	4	5	P22315;A0A494BAI5;Q544X6;F6T2S0;A0A494B9Y8;Q91W09;A0A494BBL4;A0A494BA61;A0A494BAR8	P22315;A0A494BAI5;Q544X6;F6T2S0;A0A494B9Y8;Q91W09;A0A494BBL4	Ferrochelatase, mitochondrial;Ferrochelatase
Cnn3	2.7546	22.5515	22.828	19.9866	19.8837	19.988	0.0028933	2.2981	1	1	1	1	1	1	Q9DAW9;A0A0G2JDV8	Q9DAW9;A0A0G2JDV8	Calponin-3
Tgfb1	2.75426	27.2666	27.1002	24.2896	24.5687	23.9263	0	53.642	27	8	7	8	4	5	P04202	P04202	Transforming growth factor beta-1;Latency-associated peptide
Amdhd2	2.7539	23.4161	23.3516	21.1531	20.1069	20.7886	0.0025436	2.3536	2	2	2	2	2	1	Q8JZV7;F6UP77;F7CUP3	Q8JZV7;F6UP77;F7CUP3	Putative N-acetylglucosamine-6-phosphate deacetylase
Ndufaf2	2.75349	22.3018	21.7229	19.556	18.9618	19.5391	0	9.1535	2	1	1	1	0	1	Q59J78;A0A286YE75	Q59J78;A0A286YE75	Mimitin, mitochondrial
Usp47	2.75284	20.8934	21.2632	18.161	18.49	16.08	0.0039007	2.1102	1	1	1	1	1	1	Q8BY87;A0A1L1SV73	Q8BY87;A0A1L1SV73	Ubiquitin carboxyl-terminal hydrolase 47
Pfkl	2.75275	25.0909	24.9304	21.8568	22.659	21.2194	0	10.387	6	4	4	4	2	4	P12382;P47857;A0A1W2P7T1	P12382	ATP-dependent 6-phosphofructokinase, liver type
Pfdn5	2.75214	25.8062	25.8209	23.4372	22.6856	24.0196	0	15.366	14	5	5	5	5	3	Q9WU28;H7BWX1;E9PVG3;E9PZ62;E9Q5Q8;E9Q093	Q9WU28	Prefoldin subunit 5
Mrpl12	2.75152	26.7133	26.0746	23.8693	23.4156	24.8191	0	16.963	13	6	6	6	4	3	Q9DB15	Q9DB15	39S ribosomal protein L12, mitochondrial
Clec2d	2.74455	22.3863	21.8899	19.5487	19.2383	19.7733	0.0065858	1.8843	0	1	1	1	1	1	Q91V08	Q91V08	C-type lectin domain family 2 member D
Vps35	2.74112	27.1372	27.0475	24.4571	24.2454	22.8683	0	31.669	16	8	8	8	5	5	Q9EQH3	Q9EQH3	Vacuolar protein sorting-associated protein 35
Hnrnpm	2.74018	31.8623	31.743	28.8492	29.2758	27.4524	0	149.63	172	35	33	34	30	33	Q9D0E1;B8JK32;B8JK33;A0A3Q4EH91;F6W322;F7C9U3;Q91VC4;A0A3Q4L2X3;G3X924	Q9D0E1;B8JK32;B8JK33	Heterogeneous nuclear ribonucleoprotein M
Hmbs	2.73947	20.9508	21.3325	18.4171	18.3873	18.2665	0.0025492	2.393	2	1	1	1	1	1	P22907	P22907	Porphobilinogen deaminase
Hdhd2;Ier3ip1	2.73906	22.3008	21.7992	18.9617	19.6601	20.2012	0	3.8613	0	1	1	1	0	1	D6RI20;Q9CR20	D6RI20;Q9CR20	Immediate early response 3-interacting protein 1
Emilin1	2.73888	26.7685	26.1909	23.7731	23.7085	21.9248	0	31.166	14	8	7	7	5	5	Q99K41	Q99K41	EMILIN-1
Pus1	2.73789	23.7954	23.7569	20.889	21.1876	20.2239	0.00074516	2.5694	3	2	2	2	1	2	Q9WU56;H7BX59;D3YWU8;D3Z092	Q9WU56;H7BX59;D3YWU8;D3Z092	tRNA pseudouridine synthase A, mitochondrial;tRNA pseudouridine synthase
Znf787	2.73751	22.8352	22.0785	19.4973	19.9413	19.896	0	2.9734	3	1	1	1	1	1	Q8BIF9	Q8BIF9	Zinc finger protein 787
Pgd	2.73579	28.5182	29.106	26.0711	26.0815	25.5162	0	62.056	37	12	12	12	11	10	Q9DCD0	Q9DCD0	6-phosphogluconate dehydrogenase, decarboxylating
Cops8	2.73565	25.4047	25.3984	23.1295	22.2023	23.6131	0	16.334	7	5	5	5	5	2	Q8VBV7;A0A087WPM5	Q8VBV7	COP9 signalosome complex subunit 8
Cd97;Adgre5	2.73524	26.0974	25.6933	22.8268	23.4934	21.9852	0	22.688	13	5	5	5	5	5	Q9Z0M6;Q9DC42;A0A0D9SEG8;E9QMJ5;E9QJS7	Q9Z0M6;Q9DC42;A0A0D9SEG8;E9QMJ5;E9QJS7	CD97 antigen
Cdk2;Cdk3	2.73523	25.5261	25.7079	23.3593	22.4042	22.5838	0	5.3511	4	2	2	2	1	1	P97377;Q80YP0	P97377;Q80YP0	Cyclin-dependent kinase 2;Cyclin-dependent kinase 3
Glo1	2.72999	26.3426	26.3732	23.5791	23.6767	24.1012	0	13.956	15	5	5	5	4	5	Q9CPU0;A0A494BAF7;A0A494BBE7;A0A494B970	Q9CPU0;A0A494BAF7;A0A494BBE7	Lactoylglutathione lyase
Rbm42	2.72826	25.4055	25.3091	21.8213	23.4368	22.5034	0	39.041	8	3	3	3	3	3	Q91V81;D3YYW8	Q91V81;D3YYW8	RNA-binding protein 42
Lrba;Nbea	2.72609	20.7844	20.5859	18.3545	17.5637	14.8003	0.0032258	2.2029	2	1	1	1	1	1	Q9ESE1;Q9EPN1;E9Q3Y4;A0A1D5RM41;A0A0A6YXX3;A0A0A6YXL6	Q9ESE1;Q9EPN1;E9Q3Y4;A0A1D5RM41;A0A0A6YXX3;A0A0A6YXL6	Lipopolysaccharide-responsive and beige-like anchor protein;Neurobeachin
Gns	2.72558	28.0959	27.4257	25.1305	24.9399	24.354	0	35.881	27	10	10	9	6	7	Q8BFR4;A0A1W2P8D3;A0A1W2P6W9	Q8BFR4	N-acetylglucosamine-6-sulfatase
Cox6c	2.72509	29.0684	28.603	26.1246	26.0967	27.7332	0	17.58	15	6	5	5	6	6	Q9CPQ1;A0A0G2JDA6	Q9CPQ1	Cytochrome c oxidase subunit 6C
Tsc22d1;Tsc22d4;Tsc22d2;Tsc22d3	2.72439	24.0475	24.9218	22.0217	21.4988	22.1628	0	8.7982	2	2	1	2	1	1	P62500;H3BLI9;D3YW86;D3Z0V7;E9QLZ1;Q9EQN3;E9Q7M2;Q9Z2S7;D3YZZ4;F6VXN4;B1AVF2;A0A0G2JFZ4	P62500;H3BLI9;D3YW86;D3Z0V7;E9QLZ1;Q9EQN3;E9Q7M2;Q9Z2S7;D3YZZ4;F6VXN4;B1AVF2;A0A0G2JFZ4	TSC22 domain family protein 1;TSC22 domain family protein 4;TSC22 domain family protein 3
Sf3a3	2.72399	26.6851	26.6881	23.7416	24.1836	23.3072	0	17.053	14	6	6	6	5	6	Q9D554	Q9D554	Splicing factor 3A subunit 3
H2-Ab1	2.7179	31.4562	30.7697	28.5412	28.2489	28.4463	0	69.04	61	11	11	11	11	11	P14483;P06346;P06344;P06345;P06343;A0A494B9G5;A0A494B9U2;P06342;P01921	P14483;P06346;P06344;P06345;P06343;A0A494B9G5	H-2 class II histocompatibility antigen, A beta chain;H-2 class II histocompatibility antigen, A-F beta chain;H-2 class II histocompatibility antigen, A-U beta chain;H-2 class II histocompatibility antigen, A-S beta chain;H-2 class II histocompatibility antigen, A-K beta chain
Rbbp4	2.71664	27.0799	27.0568	24.83	23.8734	24.4759	0	22.572	17	5	5	5	5	4	Q60972	Q60972	Histone-binding protein RBBP4
Acly	2.71603	26.8053	26.8202	24.2715	23.9219	22.1116	0	37.485	21	11	11	11	10	9	Q91V92;Q3V117;Q3TS02	Q91V92;Q3V117	ATP-citrate synthase
Ssu72	2.71531	20.5014	20.6972	17.8238	17.9442	18.3473	0.00037979	2.8158	1	1	1	1	1	1	Q9CY97	Q9CY97	RNA polymerase II subunit A C-terminal domain phosphatase SSU72
Serpinb2	2.7135	23.9752	22.7527	21.5278	19.7731	20.4939	0	5.2901	1	1	1	1	1	0	P12388	P12388	Plasminogen activator inhibitor 2, macrophage
Ap2b1	2.71144	27.7876	27.6563	25.5339	24.4871	23.4814	0	52.477	34	19	17	18	16	11	Q9DBG3;H3BIY9;H3BKM0;H3BJ06	Q9DBG3;H3BIY9;H3BKM0	AP-2 complex subunit beta;AP complex subunit beta
A630001G21Rik	2.7113	29.2499	29.1849	26.6607	26.3515	26.8389	0.00074766	2.6037	3	1	1	1	1	1	Q3UTB2;Q8C9T1	Q3UTB2;Q8C9T1
Hk2	2.71029	24.8159	24.5531	22.1547	21.7937	20.2525	0	5.7315	3	4	4	4	3	2	O08528;E9Q5B5;E9Q9M6	O08528;E9Q5B5	Hexokinase-2;Hexokinase
Atp5o	2.70982	29.6408	29.2042	26.7197	26.7057	27.057	0	76.113	39	10	10	10	9	9	Q9DB20;A0A338P7G3;A0A338P776;F7D3P8;F6XVM5	Q9DB20	ATP synthase subunit O, mitochondrial
Asna1	2.7065	25.8272	24.7517	22.5551	22.6108	22.6736	0	6.1896	9	3	3	2	2	2	O54984	O54984	ATPase Asna1
Dock8	2.7064	27.5911	27.5203	24.976	24.7227	22.1043	0	47.797	24	18	16	16	11	12	Q8C147;Q8R1A4;Q8VDR9;E9PX48;A0A0U1RNK7;A0A1L1SQR4;A2A9M5;A2A9M4	Q8C147	Dedicator of cytokinesis protein 8
Soat1	2.70513	22.7428	22.5939	19.8151	20.1113	19.4174	0	3.3665	2	1	1	1	1	1	Q61263;A0A087WNN8	Q61263;A0A087WNN8	Sterol O-acyltransferase 1
Stt3b	2.70271	24.8416	24.683	21.7298	22.3894	20.931	0	6.0162	4	2	2	2	1	2	Q3TDQ1;A0A0R4J0D3	Q3TDQ1;A0A0R4J0D3	Dolichyl-diphosphooligosaccharide--protein glycosyltransferase subunit STT3B
Eif3a	2.70079	28.7775	28.4555	26.0817	25.7497	23.974	0	77.249	58	26	26	25	20	20	P23116;A0A494B9I0	P23116	Eukaryotic translation initiation factor 3 subunit A
Pttg1ip	2.70073	24.6002	24.0201	21.6966	21.5221	22.9571	0.002539	2.3205	3	2	1	2	1	1	Q8R143;E0CXB5;F6TFF2	Q8R143;E0CXB5;F6TFF2	Pituitary tumor-transforming gene 1 protein-interacting protein
Cd79a	2.70073	24.9159	24.5022	22.0114	22.0053	22.7584	0	4.2779	2	1	1	1	1	1	P11911	P11911	B-cell antigen receptor complex-associated protein alpha chain
Znf512	2.69957	25.9694	25.6285	23.7736	22.4251	22.4504	0	11.415	10	5	5	5	5	4	Q69Z99;A0A0J9YTU9;A0A0J9YU29;A0A0J9YTW0;A0A0J9YV10	Q69Z99;A0A0J9YTU9	Zinc finger protein 512
Surf4	2.69925	24.1058	23.7718	21.5596	20.9195	21.6991	0	8.1691	8	1	1	1	1	1	Q64310;E0CXD9	Q64310;E0CXD9	Surfeit locus protein 4
Gcn1l1	2.69726	24.1514	23.7155	20.7938	21.6786	17.8061	0	7.2558	3	5	5	5	4	5	E9PVA8	E9PVA8
	2.69708	25.3478	24.388	22.5001	21.8416	23.1477	0.0032063	2.1583	4	1	1	1	1	1	A0A0G2JDL9	A0A0G2JDL9
Rassf5	2.69668	21.9075	21.832	19.5123	18.8339	18.4386	0	3.805	2	1	1	1	1	1	Q5EBH1;A0A1D5RM65	Q5EBH1;A0A1D5RM65	Ras association domain-containing protein 5
Ilk	2.69662	29.6148	29.228	26.9559	26.4936	26.057	0	80.511	78	20	20	19	19	17	O55222;D3YZA5;A0A1B0GRF6;A0A1B0GR42	O55222;D3YZA5	Integrin-linked protein kinase
Rab43	2.69417	26.4262	26.1453	23.3361	23.8472	23.4145	0	15.471	7	6	6	6	4	5	Q8CG50;Q91Z34;D3Z444	Q8CG50;Q91Z34	Ras-related protein Rab-43
Ctbs	2.69353	25.7489	24.5207	22.4852	22.3973	22.2829	0	6.8944	2	3	3	2	1	1	Q8R242	Q8R242	Di-N-acetylchitobiase
Scfd1	2.69102	24.8177	24.6117	21.9892	22.0582	20.8382	0	15.721	7	4	4	4	4	4	Q8BRF7;A0A1W2P6R7	Q8BRF7	Sec1 family domain-containing protein 1
Igha	2.69101	28.1144	28.2845	25.1365	25.8804	25.7153	0	49.007	18	8	8	8	7	7	A0A0A6YXW6;A0A075B6A3;P01878	A0A0A6YXW6;A0A075B6A3;P01878	Ig alpha chain C region
Plxnb2	2.69078	24.0779	24.0328	21.2576	21.4715	18.8208	0	16.242	4	2	2	2	2	2	B2RXS4	B2RXS4	Plexin-B2
Swap70	2.68591	27.7987	27.7777	25.3134	24.8912	23.7508	0	56.029	28	11	11	10	7	7	Q6A028	Q6A028	Switch-associated protein 70
Cyfip1	2.68435	27.5583	27.2703	24.924	24.5359	22.6308	0	30.492	25	15	13	14	11	8	Q7TMB8;A0A0R4J119;A0A0U1RQ05;G3UZI5	Q7TMB8;A0A0R4J119;A0A0U1RQ05	Cytoplasmic FMR1-interacting protein 1
Adh5	2.68287	26.8744	27.1174	24.8754	23.7507	23.9761	0	51.081	19	8	7	8	8	4	P28474;Q64437;A0A0G2JGS3	P28474	Alcohol dehydrogenase class-3
Prrc2c	2.6818	23.5482	23.457	20.7896	20.8519	18.054	0	4.0695	2	2	2	2	1	1	Q3TLH4;S4R294;S4R2J9;A0A0A0MQ79	Q3TLH4;S4R294;S4R2J9;A0A0A0MQ79	Protein PRRC2C
Rpl13a	2.68175	27.699	27.9147	25.116	25.1342	25.8494	0	11.268	18	6	5	6	5	5	P19253;A0A1B0GSB2;A0A1B0GSQ6;A0A1B0GS68;A0A1B0GTA1;A0A1B0GQW6;A0A1B0GSL5;A0A1B0GSC2;A0A1B0GRH1;A0A1B0GSF0;A0A1B0GT00;A0A1B0GSJ2	P19253;A0A1B0GSB2;A0A1B0GSQ6;A0A1B0GS68;A0A1B0GTA1	60S ribosomal protein L13a
	2.67947	23.0826	22.8454	20.0621	20.5069	21.5948	0	3.748	2	1	1	1	1	1	Q9D7E4	Q9D7E4	UPF0449 protein C19orf25 homolog
Eps15l1	2.67902	25.6228	25.2579	22.806	22.7166	21.0158	0	15.33	11	6	6	5	4	4	Q60902;A0A1D5RLS1	Q60902;A0A1D5RLS1	Epidermal growth factor receptor substrate 15-like 1
Fga	2.678	32.2425	31.7232	29.4527	29.157	28.004	0	323.31	118	21	21	21	21	21	E9PV24	E9PV24	Fibrinogen alpha chain;Fibrinopeptide A;Fibrinogen alpha chain
Tceb1	2.67699	26.9401	26.8643	24.5387	23.9118	25.3095	0	37.471	11	4	4	4	3	3	P83940;A0A087WQE6;A0A087WNT1;A0A087WPE4	P83940;A0A087WQE6;A0A087WNT1;A0A087WPE4	Transcription elongation factor B polypeptide 1
Cyb5r3	2.67625	28.1437	27.9228	25.5823	25.1317	25.342	0	80.908	29	11	11	11	10	9	Q9DCN2;F2Z456	Q9DCN2;F2Z456	NADH-cytochrome b5 reductase 3;NADH-cytochrome b5 reductase 3 membrane-bound form;NADH-cytochrome b5 reductase 3 soluble form;NADH-cytochrome b5 reductase
Wdr61	2.67515	22.8828	22.542	20.1209	19.9536	20.0243	0	8.3744	1	1	1	1	1	1	Q9ERF3;D6RJ72;D6RDC7;Q8BVQ0	Q9ERF3;D6RJ72;D6RDC7;Q8BVQ0	WD repeat-containing protein 61;WD repeat-containing protein 61, N-terminally processed
Ndufb8	2.67496	26.0267	25.2974	22.834	23.1401	23.5906	0	7.5834	7	4	4	3	3	3	Q9D6J5;E9Q9J5;Q3V406;F6VCY0	Q9D6J5;E9Q9J5;Q3V406;F6VCY0	NADH dehydrogenase [ubiquinone] 1 beta subcomplex subunit 8, mitochondrial
Ifi203	2.67477	24.5411	24.1983	22.9769	20.413	20.2757	0	7.1889	3	3	3	3	3	1	E9QAN9;E9PUG6;A0A0R4J0H6	E9QAN9;E9PUG6;A0A0R4J0H6
Mthfd1l	2.67443	28.0997	27.776	25.2732	25.2537	23.4008	0	64.872	38	18	18	17	14	14	Q3V3R1	Q3V3R1	Monofunctional C1-tetrahydrofolate synthase, mitochondrial
Mcm2	2.67215	25.4669	25.227	22.6774	22.6722	21.1021	0	20.487	8	5	5	4	3	3	P97310	P97310	DNA replication licensing factor MCM2
Sf3b3	2.67166	25.2441	25.1515	22.8882	22.1641	20.7145	0	12.671	5	3	3	3	3	2	Q921M3	Q921M3	Splicing factor 3B subunit 3
Ezr	2.67118	28.1602	29.1203	26.038	25.9002	24.9189	0	73.18	44	13	12	12	12	11	P26040	P26040	Ezrin
Vapa	2.66871	27.7295	27.5598	25.1341	24.8177	24.9518	0	31.148	27	8	8	8	7	4	Q9WV55;A0A3B2W837	Q9WV55;A0A3B2W837	Vesicle-associated membrane protein-associated protein A
Sppl2a	2.66772	24.8417	23.9256	21.9406	21.4912	21.7519	0.00074963	2.6454	2	1	1	1	1	1	Q9JJF9	Q9JJF9	Signal peptide peptidase-like 2A
Psmc6	2.66467	27.1325	26.8522	24.6396	24.0158	23.8218	0	67.931	21	10	9	10	9	6	P62334	P62334	26S protease regulatory subunit 10B
Npc1l1	2.66412	23.9781	21.8705	20.3809	20.1395	18.9938	0.0045423	1.9525	1	1	1	1	0	0	Q6T3U4;Z4YJC9	Q6T3U4;Z4YJC9	Niemann-Pick C1-like protein 1
Naa50	2.6636	24.9858	24.4731	22.0282	22.1034	22.5011	0	5.6687	5	3	3	3	2	2	Q6PGB6	Q6PGB6	N-alpha-acetyltransferase 50
Isyna1	2.66203	25.1979	24.9896	22.2339	22.6295	21.8511	0	16.006	8	6	4	5	5	5	Q9JHU9;A0A1B0GS86	Q9JHU9	Inositol-3-phosphate synthase 1
Pik3c3	2.65989	20.944	20.6963	18.1497	18.1707	16.5448	0.0085646	1.7805	2	1	1	1	1	1	Q6PF93;D3YZ98;E9QLS6	Q6PF93;D3YZ98;E9QLS6	Phosphatidylinositol 3-kinase catalytic subunit type 3;Phosphatidylinositol 3-kinase
Ahsa1	2.65655	27.3425	27.1803	24.6173	24.5923	24.0834	0	29.977	19	9	9	9	8	8	Q8BK64;A0A1Y7VM19	Q8BK64	Activator of 90 kDa heat shock protein ATPase homolog 1
Rp2	2.6558	26.7183	26.3409	23.9154	23.8322	23.8459	0	7.828	10	4	4	4	3	3	Q9EPK2	Q9EPK2	Protein XRP2
Ruvbl1	2.65527	27.1494	27.1181	24.6862	24.2708	23.889	0	41.904	28	9	8	9	8	6	P60122;D3YW60	P60122	RuvB-like 1
Zc3hav1	2.65466	25.9992	26.0876	23.4526	23.3248	21.5019	0	18.32	10	7	6	7	4	5	Q3UPF5;G3X9X5;D3Z5I1	Q3UPF5;G3X9X5;D3Z5I1	Zinc finger CCCH-type antiviral protein 1
Ccar2	2.65447	22.758	22.6981	20.0678	20.0794	18.2971	0.00037893	2.7949	3	2	2	2	2	2	Q8VDP4	Q8VDP4	Cell cycle and apoptosis regulator protein 2
Serpinb1a	2.65257	29.403	29.6074	26.8644	26.8409	26.5513	0	58.81	61	17	16	17	16	16	Q9D154;Z4YK03;Q8VHP7;Q5SV42	Q9D154	Leukocyte elastase inhibitor A
Ncf1	2.64962	26.4533	26.4294	23.3962	24.1872	23.0184	0	32.939	9	6	6	5	2	5	Q09014;S4R293;F8WH69	Q09014;S4R293;F8WH69	Neutrophil cytosol factor 1
Ddx6	2.64746	27.0893	26.4438	24.334	23.9042	23.2059	0	8.4572	10	4	4	4	4	3	P54823	P54823	Probable ATP-dependent RNA helicase DDX6
Eif3d	2.64671	27.8629	27.7352	25.1589	25.1458	24.3702	0	71.421	30	13	13	13	11	10	O70194;A0A2R8VK20	O70194	Eukaryotic translation initiation factor 3 subunit D
Nup210	2.64527	24.8422	24.0645	21.776	21.8402	19.5026	0	9.5952	3	5	5	3	3	2	Q9QY81;A0A0R4J1I6;F6XGN0	Q9QY81;A0A0R4J1I6	Nuclear pore membrane glycoprotein 210
Klhdc4	2.64412	22.8536	22.4147	20.8224	19.1576	18.9417	0.0038787	2.0161	1	2	2	2	2	1	Q921I2;G3UZG5;G3UZ63;G3X961	Q921I2;G3UZG5;G3UZ63;G3X961	Kelch domain-containing protein 4
Vps4b	2.64407	27.2091	27.0278	24.485	24.4638	23.6912	0	20.71	14	9	9	9	7	7	P46467;Q8VEJ9;Q8BPY9	P46467	Vacuolar protein sorting-associated protein 4B
Abr;Bcr	2.64246	24.5288	24.3418	22.7336	20.8521	20.236	0	7.5393	3	2	2	2	2	1	Q5SSL4;H3BJY3;E9PUE7;A0A571BG95;Q6PAJ1	Q5SSL4;H3BJY3;E9PUE7;A0A571BG95;Q6PAJ1	Active breakpoint cluster region-related protein;Breakpoint cluster region protein
Wasf2	2.64062	26.8473	26.6963	24.763	23.4994	23.9199	0	27.191	18	5	5	5	5	4	Q8BH43;B1AUN0	Q8BH43;B1AUN0	Wiskott-Aldrich syndrome protein family member 2
Rassf2	2.63927	26.2084	26.3059	23.3397	23.8961	23.3065	0	15.026	7	6	6	6	4	6	Q8BMS9;A2APB1;A2AVI0	Q8BMS9	Ras association domain-containing protein 2
Napa	2.63919	26.6824	26.3467	23.6231	24.1276	23.5708	0	26.163	12	6	6	6	4	5	Q9DB05;A0A1B0GR35	Q9DB05	Alpha-soluble NSF attachment protein
Mbnl1;Mbnl2	2.63877	26.8954	27.0375	24.0398	24.6155	25.0168	0	25.755	20	6	6	6	4	5	Q9JKP5;G3X9Q0;A0A0A6YXE3;A0A0A6YVV8;A0A0A6YWB0;Q8C181;A0A2K6EDM5;A0A0A6YXP3;Q3U581;Q3U570;A0A0A6YXQ4;A0A2I3BRX8;A0A0A6YWJ5;A0A0A6YWG1;A0A0A6YXL7;S4R267;Q8R003	Q9JKP5;G3X9Q0;A0A0A6YXE3;A0A0A6YVV8;A0A0A6YWB0;Q8C181;A0A2K6EDM5;A0A0A6YXP3;Q3U581	Muscleblind-like protein 1;Muscleblind-like protein 2
Vps18	2.63827	22.3481	22.285	20.1691	19.1874	17.8709	0	6.8889	6	2	2	2	2	1	Q8R307	Q8R307	Vacuolar protein sorting-associated protein 18 homolog
Sh3bp1	2.63696	29.0116	28.7196	26.3238	26.1335	24.9176	0	119.71	48	18	18	18	14	16	P55194;A2A5V3;A2A5V2;S4R2D3;A0A2R8W6I7;S4R2T6;A2A5V1	P55194;A2A5V3;A2A5V2;S4R2D3;A0A2R8W6I7	SH3 domain-binding protein 1
Psmc4	2.63616	27.3123	26.9955	24.3809	24.6546	23.7337	0	52.868	25	11	10	9	7	9	P54775;A0A140LIZ5	P54775;A0A140LIZ5	26S protease regulatory subunit 6B
Pdlim5	2.63612	26.2756	26.3954	24.0449	23.3538	22.5575	0	19.319	14	7	6	7	5	5	Q8CI51;D9J2Z9;D9J300;D9J301;D9J302;Q9CRA2;D9J303;F8WJI6;E9Q8P5;A0A0G2JEJ0;A0A0G2JGZ5	Q8CI51;D9J2Z9;D9J300;D9J301;D9J302;Q9CRA2;D9J303;F8WJI6;E9Q8P5;A0A0G2JEJ0	PDZ and LIM domain protein 5
Pfdn2	2.63589	25.5705	25.0739	22.5119	22.8608	23.2353	0	11.123	5	2	2	2	1	2	O70591;F8WJ30	O70591;F8WJ30	Prefoldin subunit 2
Vdac2	2.63441	30.556	30.0672	27.7133	27.641	27.5448	0	177.27	56	13	13	13	13	12	Q60930;G3UX26;A0A286YCR8;D3YZT5;D3YUN8	Q60930;G3UX26;A0A286YCR8;D3YZT5	Voltage-dependent anion-selective channel protein 2
Nlrx1	2.63359	24.8572	24.5251	22.2221	21.893	20.4567	0	11.787	8	3	3	3	3	2	Q3TL44;A0A1L1ST78;A0A1L1SQN7	Q3TL44	NLR family member X1
Ndufa13	2.63345	27.2158	26.6417	24.2868	24.3038	25.1687	0	11.383	11	5	5	5	4	3	Q9ERS2	Q9ERS2	NADH dehydrogenase [ubiquinone] 1 alpha subcomplex subunit 13
Gp1bb	2.63272	27.67	27.3808	25.1772	24.6082	26.1662	0	21.337	12	3	3	3	3	3	P56400;B2RR03	P56400;B2RR03	Platelet glycoprotein Ib beta chain
Unc93b1	2.63202	26.8697	26.1128	23.9735	23.745	23.4282	0	40.132	9	4	4	4	4	4	Q8VCW4;E9PYK0;A0A494B9X0;E9Q8P6	Q8VCW4;E9PYK0	Protein unc-93 homolog B1
Igbp1	2.63126	24.5656	24.7308	22.6252	21.4087	21.7141	0	9.6498	6	3	3	3	3	2	Q61249	Q61249	Immunoglobulin-binding protein 1
FAM120A	2.63072	26.2232	26.2587	23.3199	23.9005	21.6281	0	29.715	15	10	7	8	6	5	Q6A0A9	Q6A0A9	Constitutive coactivator of PPAR-gamma-like protein 1
Polr2e	2.63045	23.7586	24.0044	21.0527	21.4494	21.6445	0	10.275	5	2	2	2	1	1	Q80UW8	Q80UW8	DNA-directed RNA polymerases I, II, and III subunit RPABC1
Scamp1	2.63042	25.1869	24.9128	22.6531	22.1858	22.2741	0	14.482	5	3	3	3	2	2	Q8K021;D3YTP4;Q3TSA8	Q8K021;D3YTP4;Q3TSA8	Secretory carrier-associated membrane protein 1
Dhx9	2.62943	28.1283	28.1916	25.5006	25.5605	23.3992	0	66.91	39	15	14	15	10	13	A0A087WPL5;E9QNN1;O70133;Q3UR42;A0A0R4J2C3;A0A087WRT3	A0A087WPL5;E9QNN1;O70133;Q3UR42	ATP-dependent RNA helicase A
Gp1ba	2.62824	27.9936	27.5438	25.3468	24.9341	24.6098	0	23.155	17	7	7	7	7	6	O35930	O35930	Platelet glycoprotein Ib alpha chain
Gmppb	2.62787	25.6115	25.1901	23.1919	22.3539	22.6387	0	7.8252	5	3	3	3	3	2	Q8BTZ7	Q8BTZ7	Mannose-1-phosphate guanyltransferase beta
Pacsin2	2.62778	27.7879	27.3044	24.9277	24.9091	24.2563	0	46.851	28	12	12	12	11	10	Q9WVE8;A0A2R8W6S4;A0A338P6P7;Q3UP40;A0A2R8W750	Q9WVE8;A0A2R8W6S4	Protein kinase C and casein kinase substrate in neurons protein 2
Anxa7	2.62667	27.9333	27.471	25.1689	24.982	24.613	0	36.904	25	9	9	8	6	7	Q07076;A0A2C9F2D2;A0A286YCW4	Q07076;A0A2C9F2D2	Annexin A7
Mylk	2.62663	26.153	25.8785	23.4387	23.3395	20.638	0	9.7275	8	6	6	6	3	4	Q6PDN3;B1B1A8	Q6PDN3;B1B1A8	Myosin light chain kinase, smooth muscle;Myosin light chain kinase, smooth muscle, deglutamylated form
Paics	2.62528	26.4147	26.3131	23.555	23.9223	23.2611	0	32.614	14	10	8	9	7	8	Q9DCL9;D3Z6P1;D6RCU8	Q9DCL9	Multifunctional protein ADE2;Phosphoribosylaminoimidazole-succinocarboxamide synthase;Phosphoribosylaminoimidazole carboxylase
Btk	2.62516	25.6283	25.4547	23.0665	22.7662	21.4396	0	9.3689	7	5	4	4	3	3	P35991;A2BDW0	P35991;A2BDW0	Tyrosine-protein kinase BTK
Slc25a10	2.62505	22.8516	23.0402	20.429	20.2126	20.2589	0	8.5758	5	1	1	1	1	1	Q9QZD8	Q9QZD8	Mitochondrial dicarboxylate carrier
Ddx3y	2.62448	23.8069	22.5088	21.9497	19.1169	19.1653	0	2.9925	1	1	1	1	1	0	Q62095;Q61496;Q3V086	Q62095	ATP-dependent RNA helicase DDX3Y
Rpl36	2.62387	27.9671	27.8868	25.1997	25.4065	27.5599	0	10.336	12	3	3	3	3	3	Q6ZWZ4;P47964	Q6ZWZ4;P47964	60S ribosomal protein L36
Selp	2.62192	27.9148	27.3689	25.4172	24.6227	24.8012	0	63.537	22	10	10	10	9	8	Q01102	Q01102	P-selectin
Acot13	2.6204	25.3401	25.1824	22.6212	22.6605	23.6731	0	6.1708	5	2	2	2	2	2	Q9CQR4	Q9CQR4	Acyl-coenzyme A thioesterase 13;Acyl-coenzyme A thioesterase 13, N-terminally processed
Slc25a20	2.62014	23.5548	23.3056	20.9142	20.706	20.5653	0.0042046	1.9639	1	1	1	1	1	1	Q9Z2Z6	Q9Z2Z6	Mitochondrial carnitine/acylcarnitine carrier protein
Hnrnph2	2.61992	26.3608	26.5029	23.6351	23.9887	23.5648	0	22.387	16	4	4	4	3	4	P70333	P70333	Heterogeneous nuclear ribonucleoprotein H2
H2-K1;H2-D1	2.61762	28.6176	28.0572	25.9267	25.5129	25.1882	0	56.451	25	8	8	8	7	7	P01901;Q3TH01;A0A494BA33;A0A494BAT0;G3UXW2;P04223;P14426;P14428;P03991;A0A0B4J1G3;A0A494B9G8;A0A494B9G2	P01901;Q3TH01;A0A494BA33;A0A494BAT0;G3UXW2;P04223;P14426	H-2 class I histocompatibility antigen, K-B alpha chain;H-2 class I histocompatibility antigen, K-K alpha chain;H-2 class I histocompatibility antigen, D-K alpha chain
	2.61747	24.7917	25.3764	22.2316	22.7015	24.3298	0.0065812	1.881	2	1	1	1	1	1	A0A140T8P9;P01638;P01637	A0A140T8P9;P01638;P01637	Ig kappa chain V-V region L6;Ig kappa chain V-V region T1
Uchl3;Uchl4	2.61709	26.7227	26.621	24.0566	24.053	24.19	0	32.785	23	7	7	6	5	6	Q9JKB1;P58321;A0A2I3BQ39	Q9JKB1;P58321;A0A2I3BQ39	Ubiquitin carboxyl-terminal hydrolase isozyme L3;Ubiquitin carboxyl-terminal hydrolase isozyme L4
Mrpl40	2.61686	24.0269	23.6098	21.5564	20.8465	21.5958	0	4.1202	1	2	2	2	2	1	Q9Z2Q5;D3Z7C0	Q9Z2Q5;D3Z7C0	39S ribosomal protein L40, mitochondrial
Cdk5;Cdk12;Cdk4;Cdk15;Cdk13;Cdk9;Cdk1;Cdk18;Cdk17;Cdk16	2.61627	21.6359	21.7729	18.8936	19.2827	18.9256	0.0042032	1.9625	2	1	1	1	1	1	A0A0G2JDL3;P49615;Q14AX6;P30285;A0A1L1SUS7;E9PZX7;E3W997;E9Q9E4;A0A1Y7VLM0;Q3V3A1;Q69ZA1;Q99J95;P11440;Q04899;Q8K0D0;Q04735;D3Z2T9	A0A0G2JDL3;P49615;Q14AX6;P30285;A0A1L1SUS7;E9PZX7;E3W997;E9Q9E4;A0A1Y7VLM0;Q3V3A1;Q69ZA1;Q99J95;P11440;Q04899;Q8K0D0;Q04735;D3Z2T9	Cyclin-dependent-like kinase 5;Cyclin-dependent kinase 12;Cyclin-dependent kinase 4;Cyclin-dependent kinase 15;Cyclin-dependent kinase 13;Cyclin-dependent kinase 9;Cyclin-dependent kinase 1;Cyclin-dependent kinase 18;Cyclin-dependent kinase 17;Cyclin-dependent kinase 16
Tcea1	2.61555	26.5025	26.7563	23.9899	24.0378	23.7649	0	22.487	9	7	6	7	5	5	P10711;E9PYD5;B7ZCS4;F6XMY4;Q9QVN7	P10711;E9PYD5	Transcription elongation factor A protein 1
Pdcl3	2.61304	23.3711	22.8785	20.935	20.0885	20.4629	0	3.7235	2	2	2	1	1	1	Q8BVF2;A0A0A6YXV1	Q8BVF2;A0A0A6YXV1	Phosducin-like protein 3
Sae1	2.61257	22.4914	24.2518	19.9589	21.5592	20.2527	0	5.406	3	3	2	3	2	3	Q9R1T2	Q9R1T2	SUMO-activating enzyme subunit 1;SUMO-activating enzyme subunit 1, N-terminally processed
Bag6	2.61197	22.1743	21.929	19.5446	19.3347	18.2752	0.0018423	2.4788	2	1	1	1	1	1	Q9Z1R2;G3UXT8;G3UYQ2;A0A1B0GX81;G3UZT6;Q3UF95	Q9Z1R2;G3UXT8;G3UYQ2;A0A1B0GX81;G3UZT6;Q3UF95	Large proline-rich protein BAG6
Vdac3	2.61148	28.6981	28.2706	25.9845	25.7612	25.9098	0	48.904	28	10	10	10	7	8	Q60931;J3QMG3	Q60931;J3QMG3	Voltage-dependent anion-selective channel protein 3
Spta1	2.61138	25.4164	23.6074	21.6153	22.1857	18.8679	0	20.057	5	7	7	3	2	3	P08032	P08032	Spectrin alpha chain, erythrocytic 1
Mcm7	2.61073	25.9597	25.6293	22.6889	23.6786	21.8238	0	15.647	13	6	6	6	4	6	Q61881;D3Z6N3	Q61881	DNA replication licensing factor MCM7
Cnbp	2.60945	26.0861	26.1805	23.4991	23.5485	23.6524	0	9.3926	10	3	3	3	3	3	P53996;A0A0N4SVS6	P53996;A0A0N4SVS6	Cellular nucleic acid-binding protein
Ephx1	2.60892	26.4192	26.0441	23.5347	23.7107	22.6541	0	16.143	14	6	5	6	4	5	Q9D379;E9PWK1;F6YTS6;D3Z4M3	Q9D379;E9PWK1;F6YTS6	Epoxide hydrolase 1
Ap1g2	2.60801	21.1768	21.9927	19.1933	18.7602	17.6852	0	6.6237	3	1	1	1	1	1	O88512	O88512	AP-1 complex subunit gamma-like 2
Snrnp200	2.60592	27.7313	27.5708	25.1387	24.9516	21.9902	0	96.386	42	21	21	20	19	18	Q6P4T2	Q6P4T2	U5 small nuclear ribonucleoprotein 200 kDa helicase
Gmpr	2.60529	25.7398	25.1357	22.7931	22.8718	22.6843	0	6.6672	3	3	3	3	3	3	Q9DCZ1;F6VY18;A0A2I3BRT9	Q9DCZ1;F6VY18	GMP reductase 1
Ptbp3	2.60486	27.368	27.3816	24.6025	24.9374	24.5083	0	50.456	27	8	7	8	6	6	Q8BHD7;G8JL74;G3UXA6;G3UZ01;F7C521;G3UY95;G3UXZ8	Q8BHD7;G8JL74;G3UXA6;G3UZ01	Polypyrimidine tract-binding protein 3
Idh3b	2.6048	26.6013	26.2472	23.9049	23.734	23.4055	0	20.733	15	5	5	5	5	4	Q91VA7;A0A668KL51;V9GXV0	Q91VA7;A0A668KL51	Isocitrate dehydrogenase [NAD] subunit, mitochondrial
Vbp1	2.60421	24.4618	24.2174	21.7036	21.7671	21.6569	0	8.3219	4	3	3	3	3	2	P61759;Q3TIR6	P61759	Prefoldin subunit 3
Sdf2l1	2.60367	26.2407	25.4544	23.4803	23.0076	23.5305	0	7.1765	3	2	2	2	2	1	Q9ESP1	Q9ESP1	Stromal cell-derived factor 2-like protein 1
	2.60361	23.3083	23.2237	20.7036	20.6211	20.2384	0	3.5594	2	1	1	1	1	1	Q8BVA5;A0A1W2P6L7;A0A1W2P7T7;A0A0F6AIX6;A0A1W2P7C8;A0A0F6AIX5	Q8BVA5;A0A1W2P6L7;A0A1W2P7T7;A0A0F6AIX6;A0A1W2P7C8;A0A0F6AIX5	UPF0554 protein C2orf43 homolog
Pabpn1;Gm20521	2.60322	24.886	24.6417	22.5242	21.7971	22.4096	0	11.283	4	3	2	3	2	1	Q8CCS6;G3UY42;D3YUB9;D3Z055;G3UWS5;D3Z5F7;Q5XFR0;B7ZP52	Q8CCS6;G3UY42;D3YUB9;D3Z055;G3UWS5;D3Z5F7	Polyadenylate-binding protein 2
Ddx19b	2.60249	20.9566	21.5373	18.826	18.4629	17.7385	0	5.6029	2	1	1	1	1	1	Q8R3C7	Q8R3C7
Stx12	2.60128	25.8043	25.6187	23.2123	23.0082	23.2342	0	12.142	4	3	3	3	2	2	Q9ER00	Q9ER00	Syntaxin-12
Wapal	2.59885	20.9308	21.4876	18.4344	18.7863	16.3666	0	3.2055	1	1	1	1	1	1	Q65Z40;B7ZP47	Q65Z40;B7ZP47	Wings apart-like protein homolog
Tbc1d1	2.59831	22.0219	21.5898	19.3174	19.0977	17.0185	0	3.1471	2	1	1	1	1	1	Q60949;E9Q6L4	Q60949;E9Q6L4	TBC1 domain family member 1
Hp1bp3	2.59755	29.022	28.8558	26.1988	26.4839	25.5187	0	46.489	45	17	17	16	14	14	Q3TEA8;Z4YKB8;Z4YKA3;A2AM65;A2AM69;A2AM70;A2AM62;A2AM63	Q3TEA8;Z4YKB8;Z4YKA3;A2AM65	Heterochromatin protein 1-binding protein 3
Aimp1	2.59707	26.6947	26.1956	23.625	24.0712	23.5992	0	22.872	11	4	4	4	3	4	P31230;Q3UZG4;A0A0G2JDH0;A0A0G2JEU9;A0A0G2JDW6	P31230;Q3UZG4	Aminoacyl tRNA synthase complex-interacting multifunctional protein 1;Endothelial monocyte-activating polypeptide 2
Tmem173	2.59646	25.0703	25.4692	22.745	22.6016	22.5025	0	13.819	7	3	3	3	3	3	Q3TBT3;A0A494BBL9	Q3TBT3	Stimulator of interferon genes protein
Ctbp1	2.5951	25.5392	25.7555	23.1133	22.9912	22.4796	0	13.491	10	7	7	7	6	5	O88712;A0A0J9YUM4;A0A0J9YU62;P56546;A0A0J9YU66;A0A0J9YVI3;A0A0J9YUR5;E9Q0T4;A0A0J9YTW3;E9PWQ9;Q91YZ2;A0A0J9YVC3	O88712;A0A0J9YUM4;A0A0J9YU62	C-terminal-binding protein 1
Ugp2	2.59462	26.3411	26.0655	24.479	22.7384	22.7129	0	20.644	14	6	5	6	4	3	Q91ZJ5	Q91ZJ5	UTP--glucose-1-phosphate uridylyltransferase
Oat	2.59312	27.713	27.1046	24.8394	24.7919	24.2651	0	43.992	25	10	10	10	9	9	P29758	P29758	Ornithine aminotransferase, mitochondrial
Pafah1b2	2.59307	25.37	25.0032	22.5045	22.6826	23.6109	0	11.237	7	2	2	2	2	2	Q61206;A0A1L1SVK0;A0A1L1SQ76;A0A1L1SRD0;A0A1L1SQV7	Q61206;A0A1L1SVK0;A0A1L1SQ76;A0A1L1SRD0;A0A1L1SQV7	Platelet-activating factor acetylhydrolase IB subunit beta
Fgb	2.59293	32.3972	31.6351	29.6507	29.1958	28.6388	0	239.76	135	28	28	27	26	27	Q8K0E8	Q8K0E8	Fibrinogen beta chain;Fibrinopeptide B;Fibrinogen beta chain
Camk2g	2.59211	22.58	22.4891	20.0965	19.7884	19.1727	0.00038052	2.8258	2	1	1	1	1	1	Q923T9;A0A2I3BQP6;A0A286YCI7;A0A286YCH4;A0A286YCW8	Q923T9;A0A2I3BQP6	Calcium/calmodulin-dependent protein kinase type II subunit gamma
Rasa3	2.59081	28.1399	27.809	25.2921	25.4752	23.5041	0	48.014	41	19	18	19	14	17	Q60790;P58069;D6RFE0	Q60790	Ras GTPase-activating protein 3
Otulin	2.58982	23.3623	23.5768	20.7891	20.9704	20.2356	0.00075188	2.675	2	2	2	2	1	1	Q3UCV8;A0A2I3BRS5	Q3UCV8;A0A2I3BRS5	Ubiquitin thioesterase otulin
Arhgdib	2.58938	31.4764	31.6099	29.0541	28.8534	29.3073	0	159.93	63	11	11	11	10	11	Q61599;D3YWL7;A0A0N4SVH4	Q61599	Rho GDP-dissociation inhibitor 2
Sf3b1	2.58873	27.8277	27.9705	25.1393	25.4815	23.1697	0	48.236	25	17	16	17	12	14	Q99NB9;G5E866;A0A087WNS2	Q99NB9;G5E866	Splicing factor 3B subunit 1
Mtch2	2.58866	25.3276	25.2526	22.7075	22.6955	22.7051	0	11.842	4	3	3	3	2	2	Q791V5;A2AFW6;Q9D050	Q791V5;A2AFW6;Q9D050	Mitochondrial carrier homolog 2
Stk4	2.58778	28.5186	28.1832	26.0873	25.4389	24.7791	0	53.116	38	16	16	14	13	12	Q9JI11;Q9JI10;A0A2I3BQE0;A2A5M9;Q8CDG4;D6RHQ9;F7BYZ4	Q9JI11	Serine/threonine-protein kinase 4;Serine/threonine-protein kinase 4 37kDa subunit;Serine/threonine-protein kinase 4 18kDa subunit
Glod4	2.58736	28.0732	27.7907	25.3771	25.3121	24.7677	0	35.935	29	10	9	9	8	8	Q9CPV4;E9Q197;F6ZTG3;F7BB55;E9Q055;E9Q2R6	Q9CPV4;E9Q197;F6ZTG3	Glyoxalase domain-containing protein 4
Ndufv3	2.58632	24.4039	23.8476	22.2141	20.8647	20.9338	0	4.5055	3	2	2	2	2	1	Q3U422	Q3U422
Rps24	2.58495	28.5159	28.1005	25.8385	25.608	26.9591	0	17.812	27	5	5	5	5	5	P62849;A0A286YEB7	P62849;A0A286YEB7	40S ribosomal protein S24
Dok1	2.58233	25.0958	24.7834	22.0469	22.6677	21.6508	0	6.2004	4	3	3	3	1	2	P97465	P97465	Docking protein 1
Mrps36	2.58197	26.6979	26.3461	24.0218	23.8582	25.7543	0	9.968	10	3	3	3	2	2	Q9CQX8;Q9D6T9	Q9CQX8;Q9D6T9	28S ribosomal protein S36, mitochondrial
Eps15	2.58183	25.7179	25.8964	23.0809	23.3697	21.5739	0	24.798	10	7	6	7	5	6	P42567;Q5JC28;H3BK65;F6W2Q5;A0A0R4J0A0;H3BJB8;H3BLE4	P42567;Q5JC28;H3BK65;F6W2Q5;A0A0R4J0A0	Epidermal growth factor receptor substrate 15
Gng10;Gm20503	2.57917	25.5534	25.2224	22.6703	22.9471	24.6202	0	7.1041	8	4	4	4	3	4	Q9CXP8;G3UZK1	Q9CXP8;G3UZK1	Guanine nucleotide-binding protein G(I)/G(S)/G(O) subunit gamma-10;Guanine nucleotide-binding protein subunit gamma
Mybbp1a	2.57786	28.7241	28.3736	25.8349	26.1071	23.6326	0	123.09	56	24	22	23	17	18	Q7TPV4	Q7TPV4	Myb-binding protein 1A
Ap2a1	2.57729	22.7568	22.707	20.8174	19.4918	18.2497	0	8.5181	2	3	2	3	2	1	P17426;A0A140LIG7	P17426	AP-2 complex subunit alpha-1
Cherp	2.57679	24.5858	24.0048	21.3959	22.0412	20.5045	0	3.8968	3	2	2	2	1	2	Q8CGZ0;G5E8I8;A0A1D5RL92	Q8CGZ0;G5E8I8;A0A1D5RL92	Calcium homeostasis endoplasmic reticulum protein
Pcna	2.57597	26.1793	26.3121	23.4429	23.8965	23.4732	0	62.123	14	8	6	7	5	5	P17918	P17918	Proliferating cell nuclear antigen
Abi1	2.57588	25.7754	25.8525	23.3701	23.106	22.717	0	13.641	9	6	4	5	4	3	Q8CBW3;B7ZCU2;B7ZCU5;B7ZCU4;B7ZCU3;B7ZCU0;J3QNK8	Q8CBW3;B7ZCU2;B7ZCU5;B7ZCU4;B7ZCU3;B7ZCU0;J3QNK8	Abl interactor 1
Rps15	2.57573	27.5269	27.1671	24.5724	24.9702	25.7749	0	12.579	17	3	3	3	3	3	P62843;D3YTQ9	P62843;D3YTQ9	40S ribosomal protein S15
Cisd1	2.57567	26.8169	26.1974	23.8	24.063	25.175	0	26.335	7	4	3	4	3	2	Q91WS0	Q91WS0	CDGSH iron-sulfur domain-containing protein 1
Phgdh	2.57532	26.7778	26.961	24.3436	24.2446	23.6364	0	29.805	15	7	6	6	7	6	Q61753;F6ZSB7	Q61753	D-3-phosphoglycerate dehydrogenase
Abcb1a;Abcb1b	2.57461	21.2677	20.7131	18.2516	18.58	16.2383	0	4.6195	2	1	1	1	1	1	P21447;P06795	P21447;P06795	Multidrug resistance protein 1A;Multidrug resistance protein 1B
Tlr7	2.57391	25.995	24.7758	22.8622	22.7606	21.2254	0	28.477	6	6	6	4	4	4	P58681	P58681	Toll-like receptor 7
Nfkb2	2.5732	26.6907	26.3486	24.1096	23.7834	22.3962	0	50.299	16	8	8	7	7	7	Q9WTK5;A0A494B9Y5;A0A494BAQ2	Q9WTK5;A0A494B9Y5;A0A494BAQ2	Nuclear factor NF-kappa-B p100 subunit;Nuclear factor NF-kappa-B p52 subunit
Mcm5	2.57295	27.3331	26.9595	24.4623	24.6844	22.989	0	37.363	24	12	12	11	9	11	P49718	P49718	DNA replication licensing factor MCM5
Bax	2.57275	25.6449	25.6158	23.5345	22.5808	23.866	0	24.445	6	4	3	3	3	2	Q07813;A0A1B0GT81;A0A1B0GS13;A0A1B0GTA4;A0A1B0GT35;A0A1B0GSH8	Q07813;A0A1B0GT81;A0A1B0GS13;A0A1B0GTA4	Apoptosis regulator BAX
Tap2	2.57124	27.4301	27.213	24.872	24.6287	23.5058	0	24.072	18	8	8	8	7	7	P36371	P36371	Antigen peptide transporter 2
Tsfm	2.57034	25.3918	25.5376	22.243	23.5458	22.8053	0	26.023	5	4	3	3	2	3	Q9CZR8;Q9CX33;D3Z4M7	Q9CZR8;Q9CX33	Elongation factor Ts, mitochondrial
Ddx39b	2.57023	28.9151	29.0811	26.4175	26.4382	25.9767	0	81.026	60	18	17	18	15	14	Q9Z1N5;G3UXI6	Q9Z1N5	Spliceosome RNA helicase Ddx39b
Tes	2.57004	25.789	25.9302	23.6233	22.9558	22.3907	0	10.322	7	5	5	5	5	4	Q3ULB1;Q921W7;P47226;D6RH72	Q3ULB1;Q921W7;P47226	Testin
Ncstn	2.56913	27.4435	26.5048	24.5409	24.2692	23.2641	0	26.006	15	6	6	6	5	5	P57716	P57716	Nicastrin
Pnn	2.56845	25.7935	25.4439	22.6244	23.4761	21.8171	0	17.411	8	4	3	4	2	2	O35691;Q3TUQ5	O35691;Q3TUQ5	Pinin
Hspa14	2.56798	24.0851	21.8753	20.5741	20.2504	19.7361	0	9.1229	3	2	2	1	1	1	Q99M31	Q99M31	Heat shock 70 kDa protein 14
Lrrc40	2.56706	22.7138	22.162	20.2029	19.5388	18.3219	0.00074349	2.551	2	1	1	1	1	0	Q9CRC8;A0A0R4J0W6	Q9CRC8;A0A0R4J0W6	Leucine-rich repeat-containing protein 40
Krr1	2.56658	24.6333	24.3739	22.7718	21.1022	21.599	0	8.1285	4	3	3	3	3	1	Q8BGA5;G3UZA0	Q8BGA5;G3UZA0	KRR1 small subunit processome component homolog
Nap1l1	2.56573	29.1257	28.8087	26.507	26.2959	26.393	0	112.86	41	12	12	12	12	12	P28656;Q3TF41;Q8BSH9	P28656;Q3TF41;Q8BSH9	Nucleosome assembly protein 1-like 1
Dynlrb1	2.56528	26.8883	26.5488	24.6511	23.6555	25.3797	0	25.659	15	4	4	4	4	4	P62627;A2AVR9	P62627;A2AVR9	Dynein light chain roadblock-type 1
Ckap4	2.56338	27.5475	26.9281	24.5394	24.8094	23.405	0	52.035	22	12	10	12	9	8	Q8BMK4	Q8BMK4	Cytoskeleton-associated protein 4
Gm20390;Nme2	2.5629	30.5617	30.5496	28.0888	27.8967	27.5338	0	41.221	54	9	9	9	9	9	E9PZF0;Q01768;Q5NC80;Q5NC79	E9PZF0;Q01768	Nucleoside diphosphate kinase;Nucleoside diphosphate kinase B
Stag2;Stag1	2.56281	23.2787	23.2648	20.5063	20.9116	18.5452	0.00038241	2.899	3	2	2	2	1	2	O35638;A2AFF6;Q9D3E6;D6RHQ7;D6REF2;F8WHU7	O35638;A2AFF6;Q9D3E6;D6RHQ7;D6REF2;F8WHU7	Cohesin subunit SA-2;Cohesin subunit SA-1
Nfatc2	2.56233	23.6214	23.564	21.0582	21.0025	19.461	0	3.0905	2	2	2	2	1	1	Q60591;Q8C443;A2AQC8;B5B2R5	Q60591;Q8C443;A2AQC8;B5B2R5	Nuclear factor of activated T-cells, cytoplasmic 2
Itpa	2.56148	24.3997	24.3049	22.315	21.2667	22.2707	0	15.879	7	3	3	3	3	2	Q9D892	Q9D892	Inosine triphosphate pyrophosphatase
Armc10	2.56145	26.3278	25.6506	23.5345	23.321	23.6643	0	38.13	12	5	5	5	5	3	Q9D0L7;D3Z5T2	Q9D0L7;D3Z5T2	Armadillo repeat-containing protein 10
Git2	2.56142	27.132	27.0785	24.969	24.1187	23.1704	0	44.598	30	12	12	11	11	7	E9PVA6;Q80XR8;D3Z1I2;J3QK07;F7BIK4;F6U8T2;F6WV69;D3Z409;F6SLJ2;Q68FF6;Q5F258	E9PVA6;Q80XR8;D3Z1I2;J3QK07;F7BIK4
Fgg	2.56064	32.0893	31.4677	29.4487	28.987	28.3916	0	298.96	142	25	24	24	24	24	Q8VCM7;Q3UER8	Q8VCM7;Q3UER8	Fibrinogen gamma chain
Rnh1	2.56043	29.0486	29.0214	26.5357	26.4134	25.6173	0	158.08	50	18	18	18	16	15	Q91VI7;A0A1B0GSG5;A0A1B0GRG4;A0A1B0GRY7	Q91VI7;A0A1B0GSG5;A0A1B0GRG4	Ribonuclease inhibitor
Ddx42	2.55962	23.5534	24.3288	20.7203	22.0428	19.7734	0	8.2296	5	3	2	3	1	2	Q810A7	Q810A7	ATP-dependent RNA helicase DDX42
Fhod1	2.55887	28.1964	27.9164	25.9357	25.0595	23.5431	0	125.87	47	18	18	18	15	12	Q6P9Q4	Q6P9Q4	FH1/FH2 domain-containing protein 1
Mrpl39	2.5585	22.0629	22.1064	19.2869	19.7654	18.8544	0.00038314	2.9381	2	1	1	1	1	1	Q9JKF7	Q9JKF7	39S ribosomal protein L39, mitochondrial
Dnajc2	2.55829	25.0588	24.9788	22.065	22.856	21.3954	0	21.108	9	5	5	5	2	3	P54103;E9Q9H2;E9Q9H3;Q3TRX6	P54103;E9Q9H2;E9Q9H3	DnaJ homolog subfamily C member 2;DnaJ homolog subfamily C member 2, N-terminally processed
Rpl36a	2.55822	27.3052	27.0145	24.7055	24.4978	26.3929	0.0007533	2.6865	6	1	1	1	1	1	P83882;A0A2I3BPG9	P83882;A0A2I3BPG9	60S ribosomal protein L36a
Cpox	2.55804	25.5744	24.744	22.2438	22.9585	21.8572	0	12.918	7	4	4	4	4	3	P36552	P36552	Oxygen-dependent coproporphyrinogen-III oxidase, mitochondrial
Slc25a13	2.55755	23.3055	23.1857	20.781	20.595	19.3035	0.00038285	2.9334	2	1	1	1	1	1	Q9QXX4	Q9QXX4	Calcium-binding mitochondrial carrier protein Aralar2
Got2	2.55736	30.0124	29.7772	27.346	27.3289	26.4248	0	79.62	61	19	18	19	18	17	P05202	P05202	Aspartate aminotransferase, mitochondrial
Exoc2	2.55732	22.5793	22.3001	19.8195	19.9454	18.0574	0.0085911	1.803	0	1	1	1	1	1	Q9D4H1	Q9D4H1	Exocyst complex component 2
Smarcc2;Smarcc1	2.55667	24.8049	24.9249	22.0274	22.589	20.3959	0	13.737	6	5	4	5	3	3	Q6PDG5;Q3UID0;P97496;Q3UNN4;A0A1W2P6N7;Q3UZD0	Q6PDG5;Q3UID0;P97496;Q3UNN4	SWI/SNF complex subunit SMARCC2;SWI/SNF complex subunit SMARCC1
Pafah1b1	2.55617	26.3075	26.0796	23.716	23.5588	22.9007	0	9.3164	5	5	5	4	2	2	P63005;Q5SW16	P63005	Platelet-activating factor acetylhydrolase IB subunit alpha
Ndufv1	2.55575	27.599	27.2013	24.9364	24.7524	24.1794	0	45.661	25	10	10	10	8	8	Q91YT0;D3YUM1;D3Z1U9;D3Z0K1;D3YXX5;D6RG60;A0A494BAS8;A0A494BA02	Q91YT0;D3YUM1;D3Z1U9	NADH dehydrogenase [ubiquinone] flavoprotein 1, mitochondrial
Themis	2.55564	24.7024	23.8225	21.8589	21.5547	20.5469	0.0018362	2.45	4	1	1	1	1	1	Q8BGW0	Q8BGW0	Protein THEMIS
Hrsp12	2.55563	26.8477	26.4548	24.2116	23.9796	24.8899	0	40.254	11	5	4	4	3	3	P52760	P52760	Ribonuclease UK114
Ndufb9	2.55509	26.4565	26.0931	23.6604	23.7791	24.5114	0	28.079	9	4	4	4	4	4	Q9CQJ8	Q9CQJ8	NADH dehydrogenase [ubiquinone] 1 beta subcomplex subunit 9
Rgs10	2.55494	27.2257	26.9373	24.652	24.4012	25.3152	0	33.527	15	6	6	5	5	4	Q9CQE5;D3Z1B6;A0A0U1RPU5	Q9CQE5	Regulator of G-protein signaling 10
Ggt5	2.55445	22.518	22.6657	19.9601	20.1146	19.0132	0	6.4051	3	2	2	2	2	2	Q9Z2A9;A0A087WSM3;Q80WV0	Q9Z2A9;A0A087WSM3;Q80WV0	Gamma-glutamyltransferase 5;Gamma-glutamyltransferase 5 heavy chain;Gamma-glutamyltransferase 5 light chain
Eif4a1	2.55423	29.7201	29.5008	26.9567	27.1558	26.3178	0	137.36	70	20	20	20	19	20	P60843	P60843	Eukaryotic initiation factor 4A-I
Nipsnap1	2.55393	25.0721	24.6055	22.4884	22.0814	22.2765	0	5.2018	5	2	2	2	2	1	O55125;Q5SVG6	O55125;Q5SVG6	Protein NipSnap homolog 1
C4b	2.55373	23.8913	23.2852	21.0714	20.9977	18.5755	0	3.4328	3	2	2	2	2	2	P01029	P01029	Complement C4-B;Complement C4 beta chain;Complement C4 alpha chain;C4a anaphylatoxin;Complement C4 gamma chain
Ptp4a2	2.55039	23.284	23.7723	21.1122	20.8434	21.4522	0	6.9536	2	3	2	3	1	1	O70274	O70274	Protein tyrosine phosphatase type IVA 2
Psmd2	2.54977	27.7598	27.2845	25.1642	24.7806	23.1534	0	55.611	25	13	12	13	8	7	Q8VDM4;A0A338P6M5;E9Q2S8;A0A338P6S9;A0A338P7H4	Q8VDM4	26S proteasome non-ATPase regulatory subunit 2
Ddx23	2.54816	25.6455	25.3487	22.9778	22.92	21.2719	0	8.1168	10	4	4	4	3	3	D3Z0M9	D3Z0M9
Prkd2	2.54751	21.1834	21.2585	18.9458	18.4011	17.134	0.0065744	1.8795	0	1	1	1	0	0	Q8BZ03	Q8BZ03	Serine/threonine-protein kinase D2
Arih1	2.54738	24.8432	24.7487	22.2672	22.23	21.3241	0	8.321	3	4	4	4	4	4	Q9Z1K5;H9KV21;H7BWY7	Q9Z1K5;H9KV21;H7BWY7	E3 ubiquitin-protein ligase ARIH1
Lamp2	2.54731	29.795	28.783	26.814	26.6694	26.2697	0	13.615	20	5	5	5	5	5	P17047	P17047	Lysosome-associated membrane glycoprotein 2
Pbdc1	2.54702	24.6571	23.6596	21.5094	21.7133	21.9998	0	7.2587	3	3	3	2	2	2	Q9D0B6	Q9D0B6	Protein PBDC1
Crlf3	2.5464	27.1039	27.4029	24.8392	24.5748	24.241	0	42.514	25	7	6	7	7	7	Q9Z2L7;J3QMV5	Q9Z2L7;J3QMV5	Cytokine receptor-like factor 3
Otud6b	2.54615	22.1253	22.2504	19.5679	19.7155	19.7169	0.00038197	2.8678	2	2	2	2	2	2	Q8K2H2;A0A0A0MQF5;F6VDQ9	Q8K2H2;A0A0A0MQF5;F6VDQ9	OTU domain-containing protein 6B
Gabpa	2.54606	22.6215	22.5588	19.9403	20.1478	19.497	0.0032456	2.2754	2	1	1	1	1	1	Q00422	Q00422	GA-binding protein alpha chain
Irgm1	2.54561	26.9397	26.2394	24.0413	24.0465	23.7662	0	14.126	12	5	5	5	4	4	Q60766	Q60766	Immunity-related GTPase family M protein 1
Ddx18	2.54486	26.1966	25.9481	23.3102	23.7448	22.22	0	15.557	8	8	6	7	6	7	Q8K363;F6ZX28	Q8K363	ATP-dependent RNA helicase DDX18
Cox17	2.54432	24.5979	24.2383	21.8863	21.8612	23.6559	0	11.802	2	1	1	1	1	1	P56394	P56394	Cytochrome c oxidase copper chaperone
Pgls	2.54305	27.8067	27.9438	25.5531	25.1113	25.5226	0	50.279	30	9	9	9	9	9	Q9CQ60;D3Z4X1;Q8CBG6;F6X8L5	Q9CQ60;D3Z4X1;Q8CBG6	6-phosphogluconolactonase
Fkbp8	2.54251	23.7061	23.5287	21.1811	20.9687	20.6009	0	4.8069	2	1	1	1	1	1	O35465;F6WP10	O35465;F6WP10	Peptidyl-prolyl cis-trans isomerase FKBP8
Rpl4	2.54228	30.248	29.7778	27.5013	27.4399	27.2578	0	67.944	67	19	19	17	15	14	Q9D8E6	Q9D8E6	60S ribosomal protein L4
H2-Ob	2.54173	22.7799	22.5767	20.4905	19.7827	19.968	0	3.3588	2	1	1	1	0	1	O35424;A0A494BB12	O35424;A0A494BB12
Smpdl3a	2.54085	25.8482	24.9648	22.8785	22.8527	22.4444	0	23.128	8	4	4	4	4	3	P70158	P70158	Acid sphingomyelinase-like phosphodiesterase 3a
Cct6a	2.53844	29.2973	29.0934	26.8201	26.4937	25.7285	0	84.708	61	16	16	16	14	14	P80317;Q52KG9;Q61390;B1AT05	P80317;Q52KG9	T-complex protein 1 subunit zeta
Eftud2	2.53786	28.2074	27.8782	25.4577	25.5522	23.6077	0	73.988	46	21	21	19	16	19	O08810;A2AH85;G3UZ34;G3UXK8	O08810;A2AH85;G3UZ34	116 kDa U5 small nuclear ribonucleoprotein component
Mapk1	2.53767	27.6404	27.5207	25.0843	25.0015	24.3515	0	48.517	27	12	10	12	9	9	P63085;A0A338P781;A0A338P736	P63085	Mitogen-activated protein kinase 1
Rplp1	2.53758	28.7535	28.5516	26.1319	26.098	28.2999	0	25.688	14	3	3	3	3	3	P47955	P47955	60S acidic ribosomal protein P1
Prpf8	2.5366	27.9826	27.4617	25.2868	25.0843	21.9834	0	79.758	34	22	21	20	18	16	Q99PV0;B7ZC27	Q99PV0	Pre-mRNA-processing-splicing factor 8
Nedd4l	2.53625	22.9136	22.6529	20.2618	20.2322	18.3739	0	3.7867	2	1	1	1	1	1	Q8CFI0;A0A286YCR1;A0A494BA39;A0A494B9F0;A0A494B953;A0A494BAG2;A0A494BAX0	Q8CFI0;A0A286YCR1;A0A494BA39;A0A494B9F0;A0A494B953;A0A494BAG2;A0A494BAX0	E3 ubiquitin-protein ligase NEDD4-like
Trim25	2.53597	24.7013	24.3951	22.2085	21.816	20.6574	0	4.0506	3	2	2	2	2	2	Q61510;Q5SU71;Q5SU72	Q61510;Q5SU71;Q5SU72	E3 ubiquitin/ISG15 ligase TRIM25
Cs;Csl	2.53585	29.9157	29.5833	27.0336	27.3937	26.667	0	40.794	51	13	13	13	11	13	Q9CZU6;Q80X68	Q9CZU6;Q80X68	Citrate synthase, mitochondrial;Citrate synthase
Ehd3	2.53345	26.087	25.825	23.9724	22.8727	22.3991	0	35.953	7	4	4	4	4	3	Q9QXY6	Q9QXY6	EH domain-containing protein 3
Tmx3	2.53143	26.336	26.2108	23.7152	23.7687	22.9812	0	36.554	11	4	4	4	4	3	Q8BXZ1;A0A494BB11;A0A494B9J5;A0A494B9P2	Q8BXZ1;A0A494BB11	Protein disulfide-isomerase TMX3
Nutf2	2.52927	26.4609	26.2216	24.6448	22.9791	24.8045	0	18.182	10	5	4	4	5	4	P61971	P61971	Nuclear transport factor 2
Acp2	2.52836	29.1317	28.1689	26.2263	26.0175	25.779	0	24.679	29	7	7	7	7	7	P24638;A0A5F8MPS7;B7ZCF5;B7ZCF4	P24638;A0A5F8MPS7;B7ZCF5	Lysosomal acid phosphatase
Iah1	2.52793	24.8027	24.7812	22.3901	22.1379	22.564	0	8.1546	7	3	3	3	3	3	Q9DB29;A0A1Y7VLY5;A0A1Y7VKA0;A0A1Y7VKC6	Q9DB29;A0A1Y7VLY5;A0A1Y7VKA0;A0A1Y7VKC6	Isoamyl acetate-hydrolyzing esterase 1 homolog
Vamp7	2.5279	24.7179	24.3035	22.0712	21.8945	22.054	0	7.9179	4	3	3	3	3	3	P70280	P70280	Vesicle-associated membrane protein 7
Idi1	2.52684	23.2552	23.2407	20.7563	20.6859	21.0194	0	5.5423	3	2	2	2	1	2	P58044;H3BLF8;G3XA48	P58044;H3BLF8;G3XA48	Isopentenyl-diphosphate Delta-isomerase 1
Stim1	2.52638	27.0333	26.8405	24.3893	24.4317	23.2637	0	81.459	20	8	8	8	7	6	P70302;A0A1B0GRA5;A0A1B0GR78;A0A1B0GQZ3	P70302;A0A1B0GRA5;A0A1B0GR78	Stromal interaction molecule 1
Pfkp	2.52562	26.4989	26.2897	23.8537	23.8837	22.5842	0	31.545	18	10	10	9	7	7	Q9WUA3;Q8C605;F6YL81;D3YUA3	Q9WUA3;Q8C605	ATP-dependent 6-phosphofructokinase, platelet type;ATP-dependent 6-phosphofructokinase
Pdha1	2.52547	27.8689	27.7299	25.3696	25.1784	24.5729	0	52.322	35	15	15	11	9	9	P35486	P35486	Pyruvate dehydrogenase E1 component subunit alpha, somatic form, mitochondrial
Timm44	2.52517	26.0474	25.3971	23.2152	23.1789	22.177	0	14.771	10	5	5	5	3	4	O35857	O35857	Mitochondrial import inner membrane translocase subunit TIM44
Sec23b	2.52266	25.1242	25.2594	22.8192	22.5191	21.1779	0	25.283	10	5	4	5	4	3	Q9D662;A2ANA0;A2AN97;A2AN98;A2AN99	Q9D662;A2ANA0	Protein transport protein Sec23B
Cad	2.52205	25.1075	25.3302	22.7394	22.6542	19.7127	0	12.609	8	5	4	5	4	4	B2RQC6;E9QAI5;G3UWN2;E9QAT6	B2RQC6;E9QAI5;G3UWN2;E9QAT6	CAD protein;Glutamine-dependent carbamoyl-phosphate synthase;Aspartate carbamoyltransferase;Dihydroorotase
Kalrn	2.51919	24.0267	22.6232	21.9811	19.6304	17.5167	0	13.066	5	3	3	1	3	1	A2CG49;D3Z534;D3Z532;D3Z535;D3Z4R2;F6QYT9;Q9CWR0;A0A1W2P6R9;A0A1Y7VNM7;A0A0R4J211;G5E825	A2CG49;D3Z534;D3Z532;D3Z535;D3Z4R2;F6QYT9	Kalirin
Slc29a3	2.51833	25.6277	25.0491	22.2911	23.3489	22.9089	0	60.198	5	2	2	2	1	2	Q99P65;D6RI95;D3YWS9	Q99P65;D6RI95;D3YWS9	Equilibrative nucleoside transporter 3
Mars	2.51743	25.3456	24.4188	22.9645	21.7651	20.703	0	7.5379	5	3	3	3	3	2	Q68FL6;E9QB02;F6W0G8	Q68FL6;E9QB02	Methionine--tRNA ligase, cytoplasmic
Ankrd13a	2.51689	24.9255	23.9837	22.0696	21.8059	20.9974	0	6.0192	3	3	3	2	2	2	Q80UP5;F7B209	Q80UP5	Ankyrin repeat domain-containing protein 13A
Dnm1l	2.51659	25.9304	25.7436	23.1476	23.4931	21.401	0	36.803	24	7	7	7	6	7	Q8K1M6;E9PUD2;A0A2U3TZ67	Q8K1M6;E9PUD2	Dynamin-1-like protein
Impdh2	2.51649	27.236	27.0669	24.6458	24.6241	23.9265	0	30.585	22	12	12	12	9	10	P24547;A0A0A6YXS4;A0A0A6YY72	P24547;A0A0A6YXS4;A0A0A6YY72	Inosine-5-monophosphate dehydrogenase 2
Gstk1	2.51623	23.1952	23.1166	21.3037	19.9756	20.3434	0.00038212	2.8704	2	1	1	1	1	0	Q9DCM2	Q9DCM2	Glutathione S-transferase kappa 1
Paox	2.51405	24.6334	24.4668	22.7215	21.3507	21.8094	0	6.0144	4	2	2	2	2	1	Q8C0L6;A0A1B0GRJ2;Q3TXR6	Q8C0L6;A0A1B0GRJ2;Q3TXR6	Peroxisomal N(1)-acetyl-spermine/spermidine oxidase
Ube2n	2.51341	29.2337	29.0571	26.6402	26.6238	27.0586	0	19.929	25	6	6	6	6	5	P61089;A0A1W2P7Z3;Q9CQ37;A0A087WPV1	P61089;A0A1W2P7Z3	Ubiquitin-conjugating enzyme E2 N
Stx4;Stx4a	2.51261	24.8719	24.7287	22.0241	22.5512	22.1314	0	7.4283	2	2	2	2	1	2	P70452;D6RJ29	P70452;D6RJ29	Syntaxin-4
Hpse	2.51187	26.6206	25.1528	24.4011	22.3485	22.5163	0	11.139	9	6	6	4	5	4	Q6YGZ1;D3Z3C3	Q6YGZ1;D3Z3C3	Heparanase;Heparanase 8 kDa subunit;Heparanase 50 kDa subunit
Abracl	2.5118	28.5734	28.5935	25.6835	26.4598	27.8243	0	16.617	15	3	3	3	3	3	Q4KML4;A0A1W2P7X0;E9QMV2	Q4KML4;A0A1W2P7X0;E9QMV2	Costars family protein ABRACL
Prps1;Prps1l3;Prps2	2.5105	26.5607	26.2652	24.1601	23.6448	23.6561	0	15.473	10	4	4	4	4	4	Q9D7G0;G3UXL2;Q9CS42	Q9D7G0;G3UXL2;Q9CS42	Ribose-phosphate pyrophosphokinase 1;Ribose-phosphate pyrophosphokinase 2
Tomm70a	2.51032	27.0017	26.9937	24.3406	24.6342	23.278	0	26.46	16	9	8	9	6	7	Q9CZW5	Q9CZW5	Mitochondrial import receptor subunit TOM70
Eif3k	2.51023	25.9494	25.7348	23.3688	23.295	23.6195	0	11.421	9	3	3	3	3	3	Q9DBZ5;A0A140LJ59;Q3TY56	Q9DBZ5;A0A140LJ59	Eukaryotic translation initiation factor 3 subunit K
Psmd7	2.50995	25.605	25.3711	23.5423	22.4139	22.8351	0	12.799	6	3	3	3	3	2	P26516	P26516	26S proteasome non-ATPase regulatory subunit 7
Ahcy	2.50986	27.7464	27.9557	25.2126	25.4698	24.4447	0	29.867	27	9	8	9	6	8	P50247;A2ALT5	P50247	Adenosylhomocysteinase
Dnpep	2.50952	25.6109	26.2863	23.2251	23.6531	22.8958	0	23.318	15	6	5	6	3	4	Q9Z2W0;Q8BPW9;Q3TVK3;A0A087WS31;A0A087WSE6	Q9Z2W0;Q8BPW9;Q3TVK3	Aspartyl aminopeptidase
Glipr2	2.50931	26.0624	25.866	23.3457	23.5641	24.2011	0	14.804	4	3	3	3	2	3	Q9CYL5;B1AWD6	Q9CYL5	Golgi-associated plant pathogenesis-related protein 1
Sp100	2.50853	28.1651	27.9839	25.4548	25.6771	24.6673	0	48.533	31	13	13	13	8	9	Q8C405;O35892;E9QA05;A0A1B0GX24;D6RIJ4;E9Q4Y0;Q99388	Q8C405;O35892;E9QA05;A0A1B0GX24;D6RIJ4;E9Q4Y0	Nuclear autoantigen Sp-100
Msra	2.50667	25.3554	25.5331	22.699	23.1761	22.7765	0	5.5435	4	3	3	3	2	3	Q9D6Y7;A0A1B0GT40	Q9D6Y7	Mitochondrial peptide methionine sulfoxide reductase
Atp2a3	2.50658	29.2038	29.0082	26.8152	26.3836	24.8857	0	123.58	66	22	20	22	20	19	Q64518;B1ATS4;B1ATS5;E9Q559	Q64518;B1ATS4;B1ATS5;E9Q559	Sarcoplasmic/endoplasmic reticulum calcium ATPase 3;Calcium-transporting ATPase
Plin3	2.50634	25.556	25.7907	22.9596	23.3744	22.2697	0	24.424	15	4	3	4	3	3	Q9DBG5	Q9DBG5	Perilipin-3
Npl	2.50574	24.814	24.6033	22.339	22.0668	21.8594	0	15.415	6	2	2	2	2	2	Q9DCJ9	Q9DCJ9	N-acetylneuraminate lyase
Nudt5	2.50479	24.6902	24.4244	21.9809	22.1242	22.3375	0	6.6776	3	3	2	2	2	2	Q9JKX6;A0A0A6YVU1;A2ATT5	Q9JKX6;A0A0A6YVU1;A2ATT5	ADP-sugar pyrophosphatase
Dad1	2.50479	24.6417	24.4424	21.0632	23.0114	23.5074	0	4.9942	5	2	2	2	1	2	P61804	P61804	Dolichyl-diphosphooligosaccharide--protein glycosyltransferase subunit DAD1
Nedd8	2.50469	26.9573	26.7643	24.6187	24.0935	26.1013	0	12.385	5	2	2	2	2	2	P29595;A0A2I3BRG0	P29595;A0A2I3BRG0	NEDD8
Ubqln1	2.50341	26.8234	26.4178	24.1345	24.0998	24.0596	0	32.755	14	6	6	6	4	6	Q8R317	Q8R317	Ubiquilin-1
Arhgef2	2.50237	26.9209	26.7045	24.2058	24.4149	22.3233	0	38.64	17	11	11	11	7	8	Q60875;H3BJU7;H3BJ45;H3BJ40;H3BKH9;H3BJX8;H3BLF9;H3BJ59;H3BL15;H3BJM4;H3BJ48;H3BLJ1;H3BIX8	Q60875;H3BJU7;H3BJ45;H3BJ40;H3BKH9;H3BJX8	Rho guanine nucleotide exchange factor 2
Nmral1	2.50189	25.3335	25.5862	23.1697	22.7463	22.614	0	8.8226	6	3	3	3	2	2	Q8K2T1;D3YU12;G5E8S7	Q8K2T1;D3YU12;G5E8S7	NmrA-like family domain-containing protein 1
Anxa4	2.50134	28.6068	28.3274	26.2443	25.6873	25.3192	0	109.17	37	13	12	13	10	9	P97429;A0A0N4SW89;D3Z0S1;A0A0N4SV57;F7ANV6;S4R1F2	P97429;A0A0N4SW89;D3Z0S1;A0A0N4SV57;F7ANV6;S4R1F2	Annexin A4;Annexin
2002-03-01	2.50028	25.8567	25.573	23.4589	22.9702	22.8712	0	20.027	14	5	5	5	5	4	Q922Q1;E0CZH6	Q922Q1;E0CZH6	Mitochondrial amidoxime reducing component 2
Fkbp4	2.49905	26.9166	26.8415	24.3003	24.4597	23.1605	0	30.6	24	11	11	11	9	10	P30416;F6S2D5;F7CAT1	P30416	Peptidyl-prolyl cis-trans isomerase FKBP4;Peptidyl-prolyl cis-trans isomerase FKBP4, N-terminally processed
Ube2q1;Ube2q2;E330021D16Rik	2.49898	21.4412	21.2681	18.1848	19.5265	18.377	0.00075047	2.6511	3	2	1	2	0	1	Q7TSS2;Q8K2Z8;D3Z647;Q8BW45	Q7TSS2;Q8K2Z8;D3Z647;Q8BW45	Ubiquitin-conjugating enzyme E2 Q1;Ubiquitin-conjugating enzyme E2 Q2
Mrpl10	2.49796	21.8353	20.6974	19.9868	17.55	18.3758	0	3.5462	1	1	1	1	0	0	Q3TBW2	Q3TBW2	39S ribosomal protein L10, mitochondrial
Hmox2	2.49726	25.8524	24.8689	23.4334	22.2934	22.5124	0	16.979	10	5	5	4	4	3	O70252;D3YX62;D3YXN4	O70252;D3YX62	Heme oxygenase 2
Vav1	2.49714	26.9239	26.7809	24.4366	24.274	22.5977	0	45.828	19	8	8	7	5	5	P27870;E9PXI0;Q8VDU4	P27870;E9PXI0;Q8VDU4	Proto-oncogene vav
Thop1	2.49648	21.5459	22.0256	19.342	19.2365	17.5202	0	3.4133	2	1	1	1	0	0	Q8C1A5;A0A0R4IZY0	Q8C1A5;A0A0R4IZY0	Thimet oligopeptidase
Galns	2.49632	25.8737	25.2252	23.1777	22.9285	22.3569	0	16.18	12	5	5	4	3	3	Q571E4;Q8CC47	Q571E4;Q8CC47	N-acetylgalactosamine-6-sulfatase
Ppp2r4	2.49617	26.576	26.4422	24.1776	23.8482	23.7472	0	20.972	18	5	5	5	5	4	P58389;B7ZDE0;A2AWF0;A2AWE9	P58389	Serine/threonine-protein phosphatase 2A activator
Dusp3	2.49596	26.9222	26.681	24.2559	24.3553	25.0414	0	63.524	16	5	5	5	5	5	Q9D7X3;B1AQF4;H3BKL8;Q3V2Y9;H3BKD1	Q9D7X3;B1AQF4;H3BKL8;Q3V2Y9	Dual specificity protein phosphatase 3
Tars	2.49569	25.2989	25.1688	22.5455	22.9308	21.115	0	10.017	7	4	4	4	3	3	Q9D0R2;A0A2I3BPK8	Q9D0R2;A0A2I3BPK8	Threonine--tRNA ligase, cytoplasmic
Dnajb6;Dnajb2	2.49549	24.5874	24.286	21.7613	22.1211	21.8732	0	3.4405	2	2	1	2	1	1	O54946;A0A0G2JER9;Q9QYI5;G3X8S5;A0A087WP03;F6YRQ2	O54946;A0A0G2JER9;Q9QYI5;G3X8S5;A0A087WP03;F6YRQ2	DnaJ homolog subfamily B member 6;DnaJ homolog subfamily B member 2
Gsn	2.49354	26.1546	25.9764	23.7339	23.4102	24.3051	0.00037908	2.7959	4	1	1	1	1	1	A6PWS5	A6PWS5
Rap1gds1	2.49308	26.0334	25.6355	23.2187	23.464	22.1286	0	11.385	7	4	4	4	3	3	E9Q912	E9Q912
Sar1b	2.49226	25.2218	25.4138	22.9618	22.6893	23.2356	0	8.4003	8	3	3	3	3	2	Q9CQC9;A0A1W2P720	Q9CQC9	GTP-binding protein SAR1b
Mthfd1	2.49183	27.9157	27.5632	25.242	25.2532	23.3408	0	49.762	34	14	14	13	14	12	Q922D8;A0A1W2P733;A0A1W2P7L5	Q922D8;A0A1W2P733	C-1-tetrahydrofolate synthase, cytoplasmic;Methylenetetrahydrofolate dehydrogenase;Methenyltetrahydrofolate cyclohydrolase;Formyltetrahydrofolate synthetase;C-1-tetrahydrofolate synthase, cytoplasmic, N-terminally processed
Irak4	2.49169	22.7073	22.9989	20.574	20.1488	19.2905	0	4.2422	3	1	1	1	1	1	Q8R4K2;Q3USX5	Q8R4K2;Q3USX5	Interleukin-1 receptor-associated kinase 4
Cdc37	2.49089	27.7582	27.8038	25.3865	25.1937	25.0179	0	49.086	27	8	8	8	7	7	Q61081;A0A1L1STC0	Q61081;A0A1L1STC0	Hsp90 co-chaperone Cdc37;Hsp90 co-chaperone Cdc37, N-terminally processed
Rplp0	2.49041	28.7746	28.6118	26.1719	26.2336	26.231	0	65.374	48	9	9	9	8	9	P14869;D3YVM5;S4R1N1	P14869;D3YVM5;S4R1N1	60S acidic ribosomal protein P0
Pde5a	2.49025	26.8307	25.9901	23.9038	23.9365	22.1132	0	34.395	7	7	7	6	4	6	Q8CG03;A0A0G2JF67	Q8CG03;A0A0G2JF67	cGMP-specific 3,5-cyclic phosphodiesterase
Ppig	2.48999	27.1706	25.5553	24.0211	23.7249	23.3255	0	18.387	16	6	5	5	6	6	A2AR02;A2AR01	A2AR02;A2AR01	Peptidyl-prolyl cis-trans isomerase G;Peptidyl-prolyl cis-trans isomerase
Eif5	2.48973	27.2204	27.059	24.6307	24.6692	23.9186	0	21.001	24	9	9	9	8	9	P59325;Q8BVV6;A0A1Y7VNP4;A0A1Y7VJG2;A0A1Y7VKT5;A0A1Y7VLQ0;A0A1Y7VLL6;A0A1Y7VLK2	P59325;Q8BVV6;A0A1Y7VNP4;A0A1Y7VJG2	Eukaryotic translation initiation factor 5
Rfc5	2.48962	24.5637	24.2752	22.1925	21.6671	21.2062	0	3.5654	4	2	2	2	2	1	Q9D0F6;D3Z1Y6	Q9D0F6;D3Z1Y6	Replication factor C subunit 5
Txndc12	2.48935	23.5844	23.1811	20.6019	21.185	21.3136	0.0065881	1.8852	3	1	1	1	1	1	Q9CQU0	Q9CQU0	Thioredoxin domain-containing protein 12
Ptges3	2.48928	28.2958	28.0064	25.6808	25.6429	26.2238	0	20.773	9	4	4	4	4	4	Q9R0Q7;D3Z7C6	Q9R0Q7;D3Z7C6	Prostaglandin E synthase 3
Marcksl1	2.48922	26.3615	26.0593	23.9272	23.5151	24.6484	0	15.127	6	2	2	2	2	1	P28667	P28667	MARCKS-related protein
Ctcf	2.48909	26.2368	25.8747	23.5754	23.5579	22.7169	0	28.207	13	6	6	6	5	5	Q61164	Q61164	Transcriptional repressor CTCF
Nars	2.48847	27.8697	27.6536	25.3626	25.1837	24.4785	0	45.249	31	11	11	11	8	9	Q8BP47;A0A498WGK2;A0A494BAX5;A0A494BB89;A0A494BAW6;A0A494B927;A0A494B996;A0A494B9G0;A0A494B949	Q8BP47;A0A498WGK2;A0A494BAX5;A0A494BB89	Asparagine--tRNA ligase, cytoplasmic
Polr2b	2.48646	24.0478	24.6357	21.1122	22.5984	19.7501	0	4.6745	1	3	3	3	2	3	Q8CFI7	Q8CFI7	DNA-directed RNA polymerase II subunit RPB2
Rhoa	2.48639	29.9727	29.7519	27.5107	27.2411	28.1037	0	61.176	43	9	8	9	9	9	Q9QUI0;A0A0A6YXF6;A0A0A6YWJ1	Q9QUI0;A0A0A6YXF6	Transforming protein RhoA
Rpl39	2.48496	25.6946	25.3896	23.2442	22.87	26.7878	0	3.3511	3	1	1	1	1	1	P62892	P62892	60S ribosomal protein L39
Alox5ap	2.48428	26.3291	26.5391	23.9358	23.9638	25.3526	0.0038938	2.077	2	1	1	1	1	1	P30355	P30355	Arachidonate 5-lipoxygenase-activating protein
Cct3	2.48261	29.4882	29.1775	26.9595	26.741	25.578	0	63.284	60	19	18	19	15	17	P80318;E9Q133;Q3U0I3;F6Q609;F6ZVG8	P80318;E9Q133;Q3U0I3;F6Q609	T-complex protein 1 subunit gamma
Loh12cr1	2.48257	22.9143	22.5755	20.2029	20.3218	20.1836	0.00074156	2.5342	1	1	1	1	1	1	Q9D920;E9Q2W8	Q9D920;E9Q2W8	Loss of heterozygosity 12 chromosomal region 1 protein homolog
Rpl24	2.48227	28.4837	28.1465	25.7896	25.876	26.561	0	15.7	19	5	5	5	5	5	Q8BP67	Q8BP67	60S ribosomal protein L24
Slain2	2.48198	22.3868	22.413	20.6864	19.1495	18.8498	0	4.9143	2	1	1	1	1	0	Q8CI08	Q8CI08	SLAIN motif-containing protein 2
Atp13a2	2.48167	25.5933	25.0959	22.9914	22.7344	21.2792	0	16.33	5	4	4	4	4	3	Q9CTG6;E9PYX5;E9Q2A4	Q9CTG6;E9PYX5;E9Q2A4	Probable cation-transporting ATPase 13A2
Hsph1	2.4816	27.2609	27.0898	24.4127	24.9748	22.8957	0	40.113	23	13	13	13	9	12	Q61699;E9Q0U7;D3Z3I9;D3Z027;A0A0J9YTZ7	Q61699;E9Q0U7	Heat shock protein 105 kDa
Gm15800	2.4799	23.601	23.8954	21.2662	21.2705	17.3486	0.0038814	2.0365	3	1	1	1	1	1	E9Q2E4;Q6GQX8	E9Q2E4;Q6GQX8
Rpl10a	2.47907	29.1866	28.8318	26.6133	26.4469	27.0868	0	39.273	33	7	7	7	6	6	A0A3B2WDD2;A0A3B2WBL1;Q5XJF6;P53026;A0A3B2W824;A0A3B2W820;A0A3B2WCA5;D6RE43	A0A3B2WDD2;A0A3B2WBL1;Q5XJF6;P53026;A0A3B2W824;A0A3B2W820	Ribosomal protein;60S ribosomal protein L10a
Ppp1ca	2.47742	28.7381	28.5316	26.2483	26.0665	25.7067	0	69.779	41	14	13	13	12	11	P62137;A0A0J9YUU8	P62137	Serine/threonine-protein phosphatase PP1-alpha catalytic subunit
Ptpn1	2.47703	27.2716	26.7223	24.3326	24.7073	23.6153	0	49.231	16	10	10	9	7	8	P35821	P35821	Tyrosine-protein phosphatase non-receptor type 1
Gnl3	2.47683	23.46	23.2351	20.7225	21.0189	19.5907	0	19.567	4	2	2	2	2	2	Q8CI11	Q8CI11	Guanine nucleotide-binding protein-like 3
Ak2	2.47661	28.7863	28.4867	26.163	26.1568	26.0741	0	34.575	32	9	9	9	8	8	Q9WTP6;F7BP55	Q9WTP6	Adenylate kinase 2, mitochondrial;Adenylate kinase 2, mitochondrial, N-terminally processed
Ipo9	2.47539	22.752	23.1288	20.8392	20.0908	18.8044	0	6.4051	3	2	2	2	2	1	Q91YE6;E9QKZ2;F6UT58;E0CY46;F6TLX3;E0CXB2	Q91YE6;E9QKZ2;F6UT58;E0CY46;F6TLX3;E0CXB2	Importin-9
Psmc1	2.47522	27.3181	27.2361	24.5983	25.0054	23.8746	0	61.265	24	8	8	8	6	8	P62192	P62192	26S protease regulatory subunit 4
Syngr2;Gm20708	2.47507	23.0689	23.1087	20.7016	20.5258	22.743	0	18.628	1	1	1	1	1	1	H3BJY1;H3BKF4;H3BIZ8;B0QZP8;O55101	H3BJY1;H3BKF4;H3BIZ8;B0QZP8;O55101	Synaptogyrin-2
Msh2	2.47506	21.1567	23.1473	19.6123	19.7417	18.1738	0	5.8078	2	2	1	2	1	1	P43247	P43247	DNA mismatch repair protein Msh2
Strn	2.47455	23.3938	22.9474	20.6614	20.7307	19.176	0	6.8965	1	1	1	1	1	1	O55106;F6Z700;F8WH41	O55106;F6Z700;F8WH41	Striatin
Eif2s3x;Eif2s3y	2.47448	28.8	28.6017	26.3963	26.0565	25.5517	0	47.441	34	13	13	13	9	10	Q9Z0N1;A2AAW9;Q9Z0N2	Q9Z0N1;A2AAW9;Q9Z0N2	Eukaryotic translation initiation factor 2 subunit 3, X-linked;Eukaryotic translation initiation factor 2 subunit 3, Y-linked
Dcps	2.47431	26.6385	26.7904	24.2926	24.1877	23.6331	0	32.798	19	8	8	8	7	7	Q9DAR7;Q3TBW9;D6RFQ0	Q9DAR7;Q3TBW9	m7GpppX diphosphatase
Cyth4	2.47368	24.3008	24.1648	21.645	21.8732	21.0142	0	10.833	6	3	3	3	2	3	Q80YW0;A0A2R8VI37	Q80YW0	Cytohesin-4
C1qbp	2.47303	29.0307	28.44	26.0535	26.4711	26.3016	0	94.736	25	5	5	5	5	5	Q8R5L1;O35658	Q8R5L1;O35658	Complement component 1 Q subcomponent-binding protein, mitochondrial
H2-DMa	2.47291	28.0468	27.5309	25.4499	25.182	26.4632	0	45.738	14	3	3	3	3	3	Q31621;P28078	Q31621;P28078	Class II histocompatibility antigen, M alpha chain
Itgb1	2.47246	29.6468	29.3049	27.1836	26.8232	25.6377	0	96.926	52	20	20	19	19	17	P09055	P09055	Integrin beta-1
Pcbp2;Pcbp3	2.47224	27.9686	28.0535	25.5495	25.5282	25.1632	0	21.966	16	6	6	6	6	5	Q61990;B2M1R7;A0A2R8VI25;A0A2R8W6L5;A0A2R8VI71;A0A2R8VHP9;Q3TT81;A0A2R8VHG2;A0A2R8VI12;A0A2R8VHY9;A0A2R8VI73;A0A2R8VKN0;A0A2R8VHZ0;A0A2R8VJY1;A0A2R8VHN3;A0A2R8VKF0;P57722;A0A2R8VHL8;A0A2R8W6U6;E9Q7D8;A0A2R8VHI3;A0A2R8VI15;A0A2R8VI92;A0A2R8W6H3;G3UYM5	Q61990;B2M1R7;A0A2R8VI25;A0A2R8W6L5;A0A2R8VI71;A0A2R8VHP9;Q3TT81;A0A2R8VHG2;A0A2R8VI12;A0A2R8VHY9;A0A2R8VI73;A0A2R8VKN0;A0A2R8VHZ0;A0A2R8VJY1;A0A2R8VHN3;A0A2R8VKF0;P57722;A0A2R8VHL8;A0A2R8W6U6;E9Q7D8	Poly(rC)-binding protein 2;Poly(rC)-binding protein 3
Ubxn6	2.47221	21.9432	22.016	19.5745	19.4403	18.8973	0	4.6402	3	1	1	1	1	1	Q99PL6;B8JJA4	Q99PL6;B8JJA4	UBX domain-containing protein 6
Glrx	2.47121	27.3053	27.4993	25.1025	24.7597	26.0609	0	13.778	16	4	4	4	4	3	Q9QUH0;A0A1Y7VM65	Q9QUH0;A0A1Y7VM65	Glutaredoxin-1
Atp6v0a1	2.47116	25.6033	25.18	22.6412	23.1998	21.6481	0	16.041	10	7	6	5	3	5	Q9Z1G4;K3W4T3;A2A599	Q9Z1G4;K3W4T3	V-type proton ATPase 116 kDa subunit a isoform 1;V-type proton ATPase subunit a
Stx6	2.47071	22.7696	21.7083	19.6313	19.9052	19.9755	0	7.9782	1	1	1	1	1	1	Q9JKK1;A0A0A6YW23	Q9JKK1;A0A0A6YW23	Syntaxin-6
Prdx6	2.47045	29.741	29.8002	27.3164	27.2838	27.1033	0	106.78	61	14	14	14	13	14	Q6GT24;O08709;D3Z0Y2;Q8BG37;A0A0A6YXQ7	Q6GT24;O08709;D3Z0Y2	Peroxiredoxin-6
Eif1a;Gm5662;Gm8300;Gm2016;Gm2035	2.46973	24.1184	23.8294	21.4797	21.5286	22.4121	0.0018342	2.4472	2	1	1	1	1	1	Q60872;A0A494BB95;Q8BX20;Q3UTA4;Q3TQZ4;J3QP87;A0A1Y7VK80;A0A1Y7VJE9;F6YNI8;Q3UT53;J3QQ02;J3QPI8;J3QMW5;A0A1Y7VNG9;A0A1Y7VLT7	Q60872;A0A494BB95;Q8BX20;Q3UTA4;Q3TQZ4;J3QP87;A0A1Y7VK80;A0A1Y7VJE9	Eukaryotic translation initiation factor 1A
Ndufa8	2.46957	27.6786	27.1384	25.1895	24.6884	25.5026	0	25.733	14	5	5	4	5	4	Q9DCJ5	Q9DCJ5	NADH dehydrogenase [ubiquinone] 1 alpha subcomplex subunit 8
Gpd2	2.46935	27.6119	26.992	24.9114	24.7538	23.1104	0	75.744	32	15	13	14	11	11	Q64521;A2AQR0	Q64521;A2AQR0	Glycerol-3-phosphate dehydrogenase, mitochondrial;Glycerol-3-phosphate dehydrogenase
Ranbp2	2.46929	25.3248	25.2006	22.6453	22.9416	19.0699	0	27.727	12	7	7	7	5	6	Q9ERU9	Q9ERU9	E3 SUMO-protein ligase RanBP2
Ncf2	2.46807	25.8752	26.3689	23.5819	23.7261	22.4256	0	10.79	9	4	4	4	4	4	O70145;A0A087WPH0	O70145	Neutrophil cytosol factor 2
Rala;Ralb	2.46723	26.4832	26.1214	23.9217	23.7485	24.3822	0	20.176	14	5	5	5	5	5	P63321;Q9JIW9;A0A1Y7VL93;F6QC68	P63321;Q9JIW9;A0A1Y7VL93	Ras-related protein Ral-A;Ras-related protein Ral-B
Anxa6	2.46678	24.737	24.7512	23.0619	21.4928	20.5577	0	35.323	3	2	2	2	2	1	F8WIT2	F8WIT2	Annexin
Cct7	2.46663	28.797	28.8921	26.4688	26.287	25.2275	0	84.207	56	18	18	18	15	17	P80313;A0A0N4SV00;A0A0N4SUI8;A0A0N4SV22	P80313;A0A0N4SV00	T-complex protein 1 subunit eta
Sar1a	2.46657	24.9927	26.0458	22.429	23.6764	23.5369	0	33.381	15	4	2	4	2	4	Q99JZ4;P36536;A0A1W2P869;A0A1W2P6N3	Q99JZ4;P36536;A0A1W2P869;A0A1W2P6N3	GTP-binding protein SAR1a
Rab32	2.4647	27.6915	27.3794	25.1372	25.0043	24.9757	0	26.579	19	6	6	6	5	6	Q9CZE3;A0A1Y7VIZ0	Q9CZE3	Ras-related protein Rab-32
Upf1	2.46417	24.307	24.5249	22.0628	21.8407	19.8023	0	14.638	3	1	1	1	1	1	Q9EPU0	Q9EPU0	Regulator of nonsense transcripts 1
Slc15a3	2.46251	25.0552	24.1763	22.3446	21.9619	21.5923	0.0055613	1.9005	3	1	1	1	1	1	Q8BPX9	Q8BPX9	Solute carrier family 15 member 3
Itgb5	2.4609	26.393	26.4819	24.0247	23.9284	22.2527	0.0065721	1.8775	4	1	1	1	1	1	O70309;G5E8F8;Q6PE70	O70309;G5E8F8;Q6PE70	Integrin beta-5;Integrin beta
Hspe1;Cpn10-rs1	2.45961	30.902	30.5201	27.9974	28.5054	28.9661	0	21.59	27	6	6	6	5	6	Q64433;Q9JI95	Q64433;Q9JI95	10 kDa heat shock protein, mitochondrial
Cybb	2.45897	26.9158	26.4892	24.1504	24.3366	23.2024	0	69.653	13	8	8	6	4	6	Q61093;E9Q7S3;E9Q802	Q61093	Cytochrome b-245 heavy chain
Dnajc7	2.45736	26.0047	25.8216	23.7957	23.1159	22.2089	0	19.049	10	7	6	6	6	4	Q9QYI3;F7BTP8;A0A6I8MWY7;A0A6I8MWZ1;A2A5E1;A0A6I8MX00;A0A6I8MWX8;A0A6I8MWZ9;A0A6I8MWW2;A0A6I8MX31;A0A6I8MWZ5;A0A6I8MWW0	Q9QYI3;F7BTP8;A0A6I8MWY7;A0A6I8MWZ1;A2A5E1;A0A6I8MX00;A0A6I8MWX8;A0A6I8MWZ9	DnaJ homolog subfamily C member 7
Lmbrd1	2.45682	26.822	25.7422	23.9338	23.7168	24.0231	0	9.7413	4	1	1	1	1	1	Q8K0B2	Q8K0B2	Probable lysosomal cobalamin transporter
Gpi	2.45662	29.2462	29.3144	26.9327	26.7146	25.8223	0	95.301	69	19	19	19	16	15	P06745;CON__Q3ZBD7;A0A0U1RP97;A0A0U1RQ18;A0A0U1RQ72	P06745	Glucose-6-phosphate isomerase
Ifi35	2.45648	26.0676	25.6574	23.5315	23.2805	23.2102	0	27.993	12	8	8	5	5	5	Q9D8C4;D6RFB1	Q9D8C4	Interferon-induced 35 kDa protein homolog
Casp1	2.45644	25.6702	25.7394	23.6956	22.8012	22.4979	0	19.132	17	7	6	7	6	6	P29452;A0A571BF22;A0A571BDI1	P29452	Caspase-1;Caspase-1 subunit p20;Caspase-1 subunit p10
A0A5F8MPY8	2.45611	21.3075	21.9094	19.0127	19.2919	17.9705	0.00038256	2.9226	2	1	1	1	1	1	A0A5F8MPY8	A0A5F8MPY8
Sf3a2	2.45609	24.922	24.7448	22.5711	22.1835	22.3788	0.002552	2.3996	3	2	2	2	2	2	Q62203;D3YW09;G3UVU2;D3Z5A6	Q62203;D3YW09;G3UVU2;D3Z5A6	Splicing factor 3A subunit 2
Rps4x;Gm15013	2.456	30.5675	30.1472	28.0001	27.8026	27.6123	0	58.052	47	15	15	15	15	15	P62702;V9GWY0	P62702;V9GWY0	40S ribosomal protein S4, X isoform;40S ribosomal protein S4
Atp5f1	2.45571	27.9507	27.5051	25.1028	25.4416	24.898	0	11.151	11	4	4	4	3	4	Q9CQQ7;A0A0G2JGX3	Q9CQQ7;A0A0G2JGX3	ATP synthase F(0) complex subunit B1, mitochondrial
St13	2.45562	28.4055	27.933	25.8433	25.5841	25.9686	0	29.138	24	8	7	8	7	6	Q99L47;F8WJK8;E9Q1V0;E9Q1X9	Q99L47;F8WJK8	Hsc70-interacting protein
Themis2	2.45321	26.4251	26.2127	23.9189	23.8125	22.5199	0	49.886	20	9	7	8	6	5	Q91YX0	Q91YX0	Protein THEMIS2
Acaa1a;Acaa1b	2.45235	28.9714	28.4469	26.1626	26.351	25.5123	0	100.03	50	15	15	14	11	12	Q921H8;H3BKL5;H3BJZ9;Q8VCH0;H3BKA1;H3BJG8;H3BJC1	Q921H8;H3BKL5;H3BJZ9;Q8VCH0	3-ketoacyl-CoA thiolase A, peroxisomal;3-ketoacyl-CoA thiolase B, peroxisomal
Shmt2	2.45223	28.2256	27.5708	25.3457	25.5462	24.3141	0	71.772	41	14	13	13	12	12	Q9CZN7	Q9CZN7	Serine hydroxymethyltransferase
Phf5a	2.45189	23.5671	23.7112	21.0556	21.319	21.8838	0	5.5543	3	2	2	1	1	2	P83870	P83870	PHD finger-like domain-containing protein 5A
Oxr1	2.45166	22.9623	23.144	20.5417	20.6613	18.8717	0.00074294	2.5451	2	1	1	1	1	1	Q4KMM3;E9Q0A7;A0A2R8VHF5;A0A2R8VHT3;B1H3M0	Q4KMM3;E9Q0A7;A0A2R8VHF5;A0A2R8VHT3;B1H3M0	Oxidation resistance protein 1
Eef1b;Eef1b2	2.45128	28.7131	28.4429	26.1677	26.0858	26.2408	0	81.594	23	6	6	6	6	5	O70251;A0A087WS46;G3UX43;G3UZ47;M0QWK5;M0QWH8	O70251;A0A087WS46	Elongation factor 1-beta
Rars	2.45083	26.1046	26.0487	23.7463	23.5053	22.1105	0	14.344	10	7	7	7	7	6	Q9D0I9	Q9D0I9	Arginine--tRNA ligase, cytoplasmic
Fam76b	2.45005	24.637	24.1691	21.5269	22.3791	21.3493	0	7.2073	3	2	2	2	1	2	Q80XP8;A0A1L1SQS5;D6RG49	Q80XP8;A0A1L1SQS5;D6RG49	Protein FAM76B
Aldh1b1	2.44976	24.9481	24.9797	22.5861	22.4422	21.6218	0	7.3732	4	4	4	4	4	3	Q9CZS1	Q9CZS1	Aldehyde dehydrogenase X, mitochondrial
Copa	2.44945	26.7003	26.8563	24.3917	24.266	21.8936	0	30.103	15	12	10	12	9	9	Q8CIE6;F8WHL2;F6XJN3	Q8CIE6;F8WHL2	Coatomer subunit alpha;Xenin;Proxenin;Coatomer subunit alpha
Eif3e	2.44776	27.2	27.0125	24.7711	24.546	23.545	0	24.751	26	10	10	10	9	9	P60229	P60229	Eukaryotic translation initiation factor 3 subunit E
Sec61g	2.44733	24.5221	24.0389	21.8705	21.7959	23.9555	0	4.5769	4	1	1	1	1	1	P60060	P60060	Protein transport protein Sec61 subunit gamma
Sdhb	2.44711	28.4965	27.8229	25.6874	25.7378	25.1877	0	24.26	26	9	9	8	7	7	Q9CQA3	Q9CQA3	Succinate dehydrogenase [ubiquinone] iron-sulfur subunit, mitochondrial
Itga1	2.44707	20.8465	21.1525	18.1745	18.9303	16.5253	0.00074129	2.5325	1	1	1	1	0	1	Q3V3R4	Q3V3R4	Integrin alpha-1
Api5	2.44648	27.3925	27.18	25.0323	24.6472	23.8907	0	23.553	16	7	7	6	6	6	O35841	O35841	Apoptosis inhibitor 5
Lta4h	2.44567	28.8233	29.1979	26.5718	26.5581	25.0546	0	51.714	49	16	16	16	13	15	P24527	P24527	Leukotriene A-4 hydrolase
Fau	2.44458	26.7797	26.5352	24.2505	24.1752	26.9052	0	3.172	1	1	1	1	1	1	P62862;A0A494B9Z0;A0A494BBA8;Q642K5	P62862;A0A494B9Z0;A0A494BBA8;Q642K5	40S ribosomal protein S30
Pgk1	2.44452	30.7527	30.8312	28.4137	28.2811	27.3355	0	174.56	90	21	21	21	20	20	P09411;S4R2M7;P09041	P09411;S4R2M7	Phosphoglycerate kinase 1;Phosphoglycerate kinase
Bzw1	2.44336	26.2827	26.0251	23.51	23.911	22.7605	0	7.2795	11	4	4	4	3	4	Q9CQC6;A0A087WPF9;A0A087WQS2	Q9CQC6;A0A087WPF9;A0A087WQS2	Basic leucine zipper and W2 domain-containing protein 1
Timm13	2.44334	26.7591	26.5316	24.0788	24.3253	25.3085	0	17.043	12	4	4	4	3	3	P62075;A0A1W2P756;A0A1W2P7H2	P62075;A0A1W2P756;A0A1W2P7H2	Mitochondrial import inner membrane translocase subunit Tim13
Rps21	2.44297	27.5683	27.4277	25.4527	24.6573	26.4296	0	21.35	13	4	4	4	4	3	Q9CQR2	Q9CQR2	40S ribosomal protein S21
Tnpo1	2.44286	25.578	25.5403	22.8753	23.3573	21.4484	0	15.124	11	6	5	6	5	5	Q8BFY9;Q3TKD0;J3QMX2;Q99LG2;A0A1B0GT37;E9PV58	Q8BFY9;Q3TKD0;J3QMX2	Transportin-1
Nsmaf	2.44239	19.9411	20.8134	18.0869	17.7828	16.5072	0.00074019	2.5245	1	1	1	1	1	1	O35242	O35242	Protein FAN
Asl	2.44165	25.4532	25.3063	22.4834	23.3928	21.9358	0	12.078	9	4	4	4	2	4	Q91YI0;E0CY49;E0CYV3	Q91YI0;E0CY49;E0CYV3	Argininosuccinate lyase
Rnf114	2.44149	24.5877	24.4503	22.1246	22.0303	21.6768	0	6.6968	4	3	3	3	3	2	Q9ET26	Q9ET26	E3 ubiquitin-protein ligase RNF114
Gbp9	2.44091	24.0087	24.1336	21.8844	21.3761	20.3197	0	4.9928	4	2	2	2	2	2	Q8BTS3	Q8BTS3
Strap	2.44044	25.8645	25.3372	23.0567	23.2641	22.4733	0	16.031	7	5	5	4	3	4	Q9Z1Z2	Q9Z1Z2	Serine-threonine kinase receptor-associated protein
Rpl14	2.44029	29.1904	29.0031	26.7312	26.5818	28.0217	0	17.532	17	5	5	5	5	5	Q9CR57;A0A1L1SUF6	Q9CR57	60S ribosomal protein L14
Reep5	2.43962	25.4321	25.0657	22.8091	22.8094	23.9178	0	3.5336	7	2	2	2	2	2	G3X8R0;A0A494BBE3	G3X8R0;A0A494BBE3	Receptor expression-enhancing protein
Gabarapl2	2.43917	22.7329	22.3353	20.0239	20.1659	20.79	0.00074655	2.5915	3	2	1	2	1	1	P60521	P60521	Gamma-aminobutyric acid receptor-associated protein-like 2
Myo1g	2.439	28.8716	28.8574	26.4093	26.4417	24.2507	0	85.133	49	20	19	19	19	19	Q5SUA5	Q5SUA5	Unconventional myosin-Ig
Kiaa1598	2.43842	26.3117	25.6768	24.2179	22.8938	22.1213	0	10.199	7	5	5	3	5	3	Q8K2Q9	Q8K2Q9	Shootin-1
Tmod3	2.43744	28.6053	28.2622	26.1624	25.8301	25.5183	0	61.466	45	12	12	12	11	8	Q9JHJ0;A0A1L1SQ12;A0A1L1SR42	Q9JHJ0	Tropomodulin-3
Trim28	2.43715	28.4625	28.5824	25.9783	26.1923	24.7242	0	122.48	38	17	16	16	14	16	Q62318	Q62318	Transcription intermediary factor 1-beta
Plcg2	2.43708	28.5417	28.513	26.1368	26.0437	23.6635	0	112.63	54	22	22	22	17	21	Q8CIH5;Q9QZE2;E9PXZ8	Q8CIH5	1-phosphatidylinositol 4,5-bisphosphate phosphodiesterase gamma-2
Dock2	2.4369	28.5242	28.3733	26.1789	25.8447	23.237	0	67.251	52	21	21	20	19	18	Q8C3J5;Q5SRI3;D6RGU3;Q3TMS1	Q8C3J5;Q5SRI3;D6RGU3	Dedicator of cytokinesis protein 2
Adrbk1;Adrbk2	2.43666	25.7939	25.9079	23.427	23.4015	21.8869	0	39.923	13	6	6	6	5	6	Q99MK8;Q7TS64;Q3UYH7;F6QY34;Q8BVT9;F7AEX1	Q99MK8;Q7TS64;Q3UYH7;F6QY34;Q8BVT9	Beta-adrenergic receptor kinase 1;Beta-adrenergic receptor kinase 2
Eif4g2	2.43535	25.0843	25.2111	22.3981	23.0265	20.7551	0	18.905	12	6	6	5	4	4	G3XA17;F7CBP1;Q62448	G3XA17;F7CBP1;Q62448	Eukaryotic translation initiation factor 4 gamma 2
Agk	2.43474	24.6908	24.9317	22.5832	22.1698	21.6032	0	15.277	5	4	3	4	3	3	Q9ESW4;A0A0J9YU24	Q9ESW4	Acylglycerol kinase, mitochondrial
Fscn1	2.43395	27.6144	27.1766	24.9017	25.0215	23.8473	0	66.206	25	10	10	9	8	9	Q61553;A0A0G2JDU7;F7BDR1	Q61553;A0A0G2JDU7	Fascin
Ywhaq	2.43315	29.5764	29.5411	27.2223	27.0289	26.9971	0	114.9	43	11	10	11	11	11	P68254	P68254	14-3-3 protein theta
Csnk2b	2.4327	25.454	25.5487	23.2039	22.9334	23.4262	0	12.711	4	3	3	3	3	3	P67871;G3UZA4;G3UZJ5;G3UZX4;G3UWU5;G3UXG7;G3UXU2	P67871;G3UZA4;G3UZJ5;G3UZX4;G3UWU5	Casein kinase II subunit beta
Vdac1	2.43262	30.8914	30.4067	28.1761	28.2567	27.824	0	171.12	68	15	15	15	14	15	Q60932	Q60932	Voltage-dependent anion-selective channel protein 1
Pitrm1	2.43257	25.1768	24.9917	22.438	22.8654	20.5271	0	14.414	10	5	4	5	3	4	Q8K411	Q8K411	Presequence protease, mitochondrial
Phb	2.43157	29.7888	29.2822	27.1102	27.0977	26.6296	0	71.133	56	16	15	15	14	15	P67778;Q5SQG5	P67778;Q5SQG5	Prohibitin
Cdc73	2.43082	21.607	21.7604	19.4974	19.0084	17.6414	0.0038801	2.0162	2	1	1	1	0	0	Q8JZM7	Q8JZM7	Parafibromin
Srp68	2.43067	25.8954	25.8722	23.4715	23.4348	22	0	13.086	8	6	5	6	4	6	Q8BMA6;A2AAN2	Q8BMA6;A2AAN2	Signal recognition particle subunit SRP68
Fhl1	2.43009	27.4225	27.2892	25.0164	24.8351	24.6963	0	18.616	13	7	7	7	6	5	P97447;A2AEX8;A2AEX6;A2AEX7;A2AEY1;A2AEY2;A2AEY0;A2AEX9;Q8CDC8	P97447;A2AEX8;A2AEX6;A2AEX7;A2AEY1;A2AEY2	Four and a half LIM domains protein 1
	2.42939	24.9032	24.5656	22.3571	22.2529	21.9886	0	17.589	7	4	4	4	4	3	Q9CQE8	Q9CQE8	UPF0568 protein C14orf166 homolog
Ppp3ca	2.42856	24.0288	23.7098	21.2035	21.6779	20.602	0	6.7169	3	3	2	3	1	2	P63328	P63328	Serine/threonine-protein phosphatase 2B catalytic subunit alpha isoform
Arf4	2.42793	26.6151	26.422	23.7645	24.4168	24.451	0	7.8251	10	3	3	3	2	2	P61750;E9Q798;F6UFB9	P61750;E9Q798;F6UFB9	ADP-ribosylation factor 4
Rps15a	2.42786	29.1825	28.8464	26.8179	26.3553	27.2715	0	19.593	22	6	5	6	6	6	P62245;F8WJ41;D3YVB4;D3Z712	P62245;F8WJ41;D3YVB4;D3Z712	40S ribosomal protein S15a
Pfas	2.42714	22.6994	22.5379	20.5005	19.8825	18.0644	0	5.8939	2	2	2	2	1	1	Q5SUR0	Q5SUR0	Phosphoribosylformylglycinamidine synthase
Vps36	2.42673	22.8959	24.1477	20.41	21.7802	20.3186	0	6.5938	3	2	2	2	1	2	Q91XD6	Q91XD6	Vacuolar protein-sorting-associated protein 36
Nfs1;Gm28036	2.42582	23.953	23.4623	21.2953	21.2684	20.1641	0.005573	1.93	1	1	1	1	1	1	Q9Z1J3;F7CZD1;F6TXD3	Q9Z1J3;F7CZD1;F6TXD3	Cysteine desulfurase, mitochondrial
Myo18a	2.42553	25.417	25.677	23.3233	22.9197	20.0725	0	26.803	8	10	6	10	6	5	Q9JMH9;E9Q405;A0A1C7ZN10;K3W4L0;B2RRE2;E9QAX2;E9QA74	Q9JMH9;E9Q405;A0A1C7ZN10;K3W4L0;B2RRE2;E9QAX2;E9QA74	Unconventional myosin-XVIIIa
Aldh18a1	2.42542	26.6214	26.5536	24.1852	24.139	22.2795	0	29.238	16	10	9	10	8	8	Q9Z110	Q9Z110	Delta-1-pyrroline-5-carboxylate synthase;Glutamate 5-kinase;Gamma-glutamyl phosphate reductase
Rps3a	2.42444	30.1988	29.4876	27.8536	26.9839	27.049	0	68.029	49	14	13	13	11	11	P97351	P97351	40S ribosomal protein S3a
Fhl3	2.42412	25.5961	25.6512	23.1877	23.2114	23.063	0	18.527	10	5	5	5	5	5	Q9R059;F2Z455;D6RJ68	Q9R059;F2Z455	Four and a half LIM domains protein 3
Slc25a24	2.42408	26.0783	25.0539	22.8757	23.4083	22.1913	0	17.713	9	5	5	4	3	4	Q8BMD8;A0A0G2JFB9	Q8BMD8	Calcium-binding mitochondrial carrier protein SCaMC-1
Spr	2.42372	26.8397	26.613	24.2314	24.3738	24.2765	0	35.533	18	8	8	8	7	7	G3UXX3;Q91XH5;Q64105;G3UZ79	G3UXX3;Q91XH5;Q64105;G3UZ79	Sepiapterin reductase
Daxx	2.42358	24.0865	23.649	21.2096	21.6787	20.6718	0	3.4182	3	1	1	1	1	1	O35613;Q3UKR0	O35613;Q3UKR0	Death domain-associated protein 6
Sec31a	2.42345	26.0872	25.9393	23.3422	23.8374	21.6209	0	16.759	12	6	6	6	4	6	Q3UPL0;S4R2A9;S4R256;S4R1T5;S4R1Y8	Q3UPL0;S4R2A9	Protein transport protein Sec31A
Wdr82	2.42243	23.2353	23.2175	20.928	20.68	20.3866	0	7.2544	4	2	2	2	2	1	Q8BFQ4;A0A1L1SRB6	Q8BFQ4;A0A1L1SRB6	WD repeat-containing protein 82
Gp9	2.422	27.7846	27.5356	25.6075	24.8687	26.3339	0	20.134	8	3	3	3	3	2	O88186	O88186	Platelet glycoprotein IX
Cdo1	2.42151	24.5818	24.5762	22.2226	22.0923	22.6562	0.0085324	1.751	4	1	1	1	1	1	P60334;A0A3Q4L374;A0A3Q4EH84;A0A3Q4L347	P60334;A0A3Q4L374;A0A3Q4EH84;A0A3Q4L347	Cysteine dioxygenase type 1
Bag1	2.42105	24.8177	24.6453	22.2429	22.378	21.811	0	7.5254	6	4	4	4	2	3	Q60739;F6TCF9	Q60739;F6TCF9	BAG family molecular chaperone regulator 1
Rcsd1	2.42024	25.6276	25.7872	23.7931	22.7812	22.5109	0	12.328	6	3	3	3	3	3	Q3UZA1	Q3UZA1	CapZ-interacting protein
Lgals3bp	2.41967	28.8671	28.0686	26.4211	25.6753	25.1836	0	119.93	37	13	13	11	12	11	Q07797;E9Q5X5	Q07797	Galectin-3-binding protein
Atp6v1c1	2.419	27.9243	26.6431	25.1942	24.5352	23.8986	0	88.794	22	13	13	10	10	10	Q9Z1G3;A0A2I3BPD0;A0A2I3BQD9	Q9Z1G3	V-type proton ATPase subunit C 1
Copb1	2.41871	26.8246	26.6488	24.3888	24.2472	22.4016	0	33.757	19	8	7	8	6	5	Q9JIF7	Q9JIF7	Coatomer subunit beta
Usp5	2.4185	28.3476	28.3191	26.0275	25.8022	24.2961	0	83.528	46	19	19	19	16	17	P56399;Q3U4W8;D3YYA5;D3Z4K7	P56399;Q3U4W8	Ubiquitin carboxyl-terminal hydrolase 5;Ubiquitin carboxyl-terminal hydrolase
Nop16	2.41813	24.4249	23.8275	21.1411	22.275	22.095	0	5.2735	5	2	2	2	1	2	Q9CPT5;D3Z7M5	Q9CPT5;D3Z7M5	Nucleolar protein 16
Acat1	2.41813	29.4687	29.1186	27.1069	26.6442	26.0935	0	100.78	52	14	13	13	13	11	Q8QZT1	Q8QZT1	Acetyl-CoA acetyltransferase, mitochondrial
Map2k1	2.4179	26.9767	26.975	24.7693	24.3467	23.9779	0	53.828	19	7	7	7	6	5	P31938	P31938	Dual specificity mitogen-activated protein kinase kinase 1
Gbas	2.41782	26.2535	25.8764	24.0736	23.2206	23.3327	0	8.5738	8	5	4	4	5	3	O55126;Q7TMG8;A0A0G2JEV1	O55126;Q7TMG8	Protein NipSnap homolog 2
Arid1a	2.41773	22.8119	23.2308	19.8198	21.3874	17.9101	0	4.7235	2	2	2	2	0	2	A2BH40;E9QAQ7	A2BH40;E9QAQ7	AT-rich interactive domain-containing protein 1A
Pdcd4	2.41745	26.6906	26.8765	24.4378	24.2945	23.5104	0	25.081	24	8	8	8	8	6	Q61823;A0A494BA05	Q61823;A0A494BA05	Programmed cell death protein 4
Vrk3	2.41724	24.8026	24.7231	22.4741	22.2171	21.3679	0	15.827	2	3	3	3	3	3	Q8K3G5;D3Z2U5;E9PY18;E9Q754;E9PW85	Q8K3G5;D3Z2U5;E9PY18;E9Q754;E9PW85	Inactive serine/threonine-protein kinase VRK3
Umps	2.41681	23.3331	23.1526	20.6284	21.0236	19.8511	0.0032097	2.1671	2	1	1	1	1	1	P13439	P13439	Uridine 5-monophosphate synthase;Orotate phosphoribosyltransferase;Orotidine 5-phosphate decarboxylase
Vamp3	2.41627	25.8438	25.4123	23.3407	23.0829	24.5683	0	25.551	6	3	3	3	3	2	P63024;P63044;B0QZN5	P63024	Vesicle-associated membrane protein 3
Ptgr2	2.41587	21.5929	21.7874	19.5435	19.005	19.3597	0	3.0902	3	1	1	1	1	1	Q8VDQ1;Q3TXN1	Q8VDQ1;Q3TXN1	Prostaglandin reductase 2
F5	2.41538	27.8547	27.2031	25.2106	25.0165	22.2382	0	36.469	26	14	14	14	12	11	O88783;CON__Q28107	O88783	Coagulation factor V;Coagulation factor V heavy chain;Coagulation factor V light chain
Rpl7	2.41515	29.6064	29.2918	27.066	27.002	27.0039	0	43.964	47	14	14	14	14	14	P14148;F6XI62	P14148;F6XI62	60S ribosomal protein L7
Rac2	2.41455	30.9837	30.9882	28.6133	28.5295	29.234	0	31.308	28	8	8	8	8	8	Q05144;A0A2R8VHH0	Q05144;A0A2R8VHH0	Ras-related C3 botulinum toxin substrate 2
Vamp5	2.4142	23.796	22.9036	21.1368	20.7345	23.0725	0.0069156	1.8667	2	1	1	1	1	1	Q9Z2P8;A0A0U1RP87	Q9Z2P8;A0A0U1RP87	Vesicle-associated membrane protein 5
Lsm6	2.41401	25.6447	25.7181	23.2507	23.284	24.6079	0	7.6744	7	5	5	5	3	3	P62313	P62313	U6 snRNA-associated Sm-like protein LSm6
Slc25a5	2.41389	31.8438	31.502	29.433	29.0849	28.6092	0	97.635	65	17	16	16	17	16	P51881	P51881	ADP/ATP translocase 2;ADP/ATP translocase 2, N-terminally processed
Rbm28	2.41325	22.2309	21.823	19.5375	19.6899	18.2002	0.0018349	2.4491	2	1	1	1	1	1	Q8CGC6	Q8CGC6	RNA-binding protein 28
Slamf1	2.41299	24.1377	24.3198	21.9846	21.6469	21.7806	0	3.7015	2	1	1	1	1	1	Q9QUM4	Q9QUM4	Signaling lymphocytic activation molecule
Letm1	2.41276	27.4549	26.9415	24.5898	24.981	23.0754	0	67.596	37	11	11	11	9	11	Q9Z2I0	Q9Z2I0	LETM1 and EF-hand domain-containing protein 1, mitochondrial
Ndufb3	2.41213	25.8593	25.6231	23.0736	23.5845	24.6753	0	5.621	6	2	2	2	1	2	Q9CQZ6	Q9CQZ6	NADH dehydrogenase [ubiquinone] 1 beta subcomplex subunit 3
Pdcd6ip	2.41211	29.0409	29.0058	26.7343	26.4881	24.749	0	111.64	66	22	20	22	20	19	Q9WU78	Q9WU78	Programmed cell death 6-interacting protein
Nceh1	2.41203	24.2139	23.8108	21.5107	21.69	21.1031	0	9.4259	8	3	3	3	3	3	Q8BLF1	Q8BLF1	Neutral cholesterol ester hydrolase 1
Psme1	2.41187	30.8501	30.5006	28.3506	28.1764	28.0262	0	125.89	83	17	17	17	16	17	P97371;G3UXZ5;G3UXY0;G3X9K9;G3UWN9;G3UXR1	P97371;G3UXZ5;G3UXY0;G3X9K9;G3UWN9	Proteasome activator complex subunit 1
Srgn	2.41149	25.0003	24.5831	22.39	22.3705	23.731	0	12.984	6	2	2	2	2	2	P13609	P13609	Serglycin
Ubxn7	2.4109	21.8612	21.5274	18.2382	20.3286	18.4347	0.00074543	2.5695	2	1	1	1	0	1	G5E8R8;Q6P5G6	G5E8R8;Q6P5G6	UBX domain-containing protein 7
Fdxr	2.4108	25.5771	25.6723	23.1782	23.2496	22.0667	0	12.553	9	5	4	5	4	4	Q61578	Q61578	NADPH:adrenodoxin oxidoreductase, mitochondrial
Slc25a3	2.41057	29.2581	28.9843	26.7821	26.6392	26.1276	0	37.385	23	8	8	8	5	8	Q8VEM8;G5E902	Q8VEM8;G5E902	Phosphate carrier protein, mitochondrial
Nudcd2	2.41046	24.7458	24.5841	22.1448	22.3641	23.1088	0	10.604	3	3	3	3	2	3	Q9CQ48;E0CYQ2	Q9CQ48;E0CYQ2	NudC domain-containing protein 2
Ergic1	2.41018	23.9034	23.3534	21.1277	21.3088	21.3145	0	11.759	2	1	1	1	1	1	Q9DC16;A0A494BAX4;F6SLP4;A0A494BAW5;A0A494BAK4	Q9DC16;A0A494BAX4;F6SLP4;A0A494BAW5;A0A494BAK4	Endoplasmic reticulum-Golgi intermediate compartment protein 1
Gpld1	2.40978	27.9771	26.8634	24.9984	25.0224	23.3316	0	49.694	18	10	10	9	8	10	Q8VCU2;O70362	Q8VCU2;O70362	Phosphatidylinositol-glycan-specific phospholipase D
Ccdc88b	2.40853	25.5563	25.637	23.1652	23.2111	20.5794	0	13.321	7	7	6	7	5	7	Q4QRL3;A0A494BB08;A0A494B939	Q4QRL3;A0A494BB08	Coiled-coil domain-containing protein 88B
Sepsecs	2.40792	24.4492	23.9225	21.6203	21.9356	20.649	0.0085558	1.7772	4	1	1	1	1	1	Q6P6M7;F6ZFG8;D6RGM2	Q6P6M7;F6ZFG8;D6RGM2	O-phosphoseryl-tRNA(Sec) selenium transferase
Tmed10	2.40747	27.4684	26.413	24.1245	24.942	24.9565	0	31.104	20	5	5	4	4	4	Q9D1D4;A0A1Y7VM54	Q9D1D4;A0A1Y7VM54	Transmembrane emp24 domain-containing protein 10
Smarce1	2.40636	24.3547	24.4052	21.8865	22.0607	21.3079	0	6.5633	3	2	2	2	2	2	O54941	O54941	SWI/SNF-related matrix-associated actin-dependent regulator of chromatin subfamily E member 1
Psme2	2.4056	28.7279	28.6011	26.3692	26.1487	26.1084	0	47.925	26	8	8	8	7	7	P97372;G3X9V0;E0CZ90	P97372;G3X9V0;E0CZ90	Proteasome activator complex subunit 2
Mri1	2.40497	26.7899	26.4541	24.3934	24.0407	23.422	0	25.367	16	7	6	7	6	6	Q9CQT1;F8WI95;F6YY88	Q9CQT1	Methylthioribose-1-phosphate isomerase
Fh	2.40421	28.6267	28.2866	26.1903	25.9146	24.9608	0	76.088	40	14	13	13	13	11	P97807;H3BKG7	P97807	Fumarate hydratase, mitochondrial
Vcl	2.40405	31.8251	31.5179	29.359	29.1758	26.6996	0	323.31	195	50	48	48	43	45	Q64727;A0A286YDJ4	Q64727	Vinculin
Vwf	2.40379	31.3887	30.8638	28.8588	28.5862	25.5022	0	323.31	195	68	67	67	60	61	E9QPU1;Q8CIZ8;Q3TPE1;Q3TD35;S4R195	E9QPU1;Q8CIZ8	von Willebrand factor;von Willebrand antigen 2
Ndufb10	2.40323	27.4394	27.1527	25.1321	24.6535	25.233	0	41.335	19	6	6	6	6	6	Q9DCS9;D3YUK4	Q9DCS9;D3YUK4	NADH dehydrogenase [ubiquinone] 1 beta subcomplex subunit 10
Cct2	2.40322	29.5118	29.4069	27.0905	27.0217	25.71	0	143.4	65	23	22	23	21	19	P80314;A0A1W2P7B7;A0A1W2P6Q3;A0A1W2P828;A0A1W2P8B6;A0A1W2P871	P80314	T-complex protein 1 subunit beta
Me2	2.40299	28.0633	27.7669	25.4899	25.5342	24.2644	0	74.994	34	14	14	14	13	13	Q99KE1	Q99KE1	NAD-dependent malic enzyme, mitochondrial
Scamp3	2.40251	26.2136	26.2053	23.9841	23.6298	23.7606	0	39.737	12	5	5	5	4	4	O35609;E9Q855;Q3UXS0	O35609;E9Q855;Q3UXS0	Secretory carrier-associated membrane protein 3
Clic1	2.40145	30.0057	30.1693	27.786	27.5861	27.4332	0	116.82	46	11	11	11	11	10	Q9Z1Q5	Q9Z1Q5	Chloride intracellular channel protein 1
Csk	2.40111	28.3338	28.2291	25.8622	25.8985	24.725	0	45.27	35	13	13	13	13	13	P41241;A0A1L1SR46;A0A1L1STA1;A0A1L1SQQ5	P41241	Tyrosine-protein kinase CSK
Rps6ka3	2.4009	27.2587	27.3182	24.6853	25.0898	23.0817	0	25.216	20	11	10	11	5	9	P18654;B1AXN9	P18654;B1AXN9	Ribosomal protein S6 kinase alpha-3
Cycs	2.39948	28.2377	27.7649	25.7382	25.4654	26.6839	0	14.695	22	5	5	5	4	4	P62897;CON__P62894;P00015	P62897	Cytochrome c, somatic
Ptbp1	2.39823	29.4138	29.3471	26.9751	26.9893	26.3094	0	134.92	76	14	14	14	13	13	Q8BGJ5;Q922I7;P17225;Q8CB58;E9QMW9;F7DCW4;E9Q0W3;F7AXP1;E9Q279	Q8BGJ5;Q922I7;P17225;Q8CB58;E9QMW9	Polypyrimidine tract-binding protein 1
Gsn	2.3979	32.1262	31.7937	29.6684	29.4557	28.1748	0	323.31	150	31	30	31	27	27	P13020;A0A0J9YUQ8;CON__Q3SX14;A0A0J9YUJ8	P13020;A0A0J9YUQ8	Gelsolin
Atp1a1	2.39755	28.5263	27.9619	25.8185	25.8746	23.9944	0	89.36	41	17	14	14	15	16	Q8VDN2;Q6PIC6;A0A0G2JGX4;Q8VCE0;Q9WV27;Q9Z1W8;Q64436;Q91WH7;E9QNX7	Q8VDN2	Sodium/potassium-transporting ATPase subunit alpha-1
Rpl6	2.39746	29.9424	29.7307	27.4008	27.4774	27.2833	0	52.645	55	11	11	10	9	9	P47911;A0A0J9YU32	P47911	60S ribosomal protein L6
Hk1	2.39724	28.4634	28.1953	25.9945	25.8697	23.8577	0	68.565	61	24	24	24	20	20	P17710;G3UVV4;D3YYR4;D3Z365;Q91W97;B4YB29;D3Z105	P17710;G3UVV4	Hexokinase-1;Hexokinase
Lyar	2.3968	25.3579	24.7241	22.6376	22.6508	22.2334	0	22.768	9	3	3	3	3	3	Q08288	Q08288	Cell growth-regulating nucleolar protein
Sfxn1	2.39655	27.9189	27.5359	25.3979	25.2638	25.0822	0	25.961	16	7	7	7	6	6	Q99JR1	Q99JR1	Sideroflexin-1
Pef1	2.39624	21.7784	21.3544	19.3449	18.9954	19.92	0	3.227	1	1	1	1	1	0	Q8BFY6	Q8BFY6	Peflin
Capn2	2.39528	27.6326	27.7068	25.4844	25.0644	23.8361	0	53.505	26	13	11	13	11	12	O08529	O08529	Calpain-2 catalytic subunit
Ak3	2.39457	27.026	26.6566	24.5394	24.3541	24.1029	0	45.232	17	8	8	8	7	6	Q9WTP7;F6RP11	Q9WTP7	GTP:AMP phosphotransferase AK3, mitochondrial
Slirp	2.39416	24.7341	23.1462	21.4356	21.6563	22.5616	0	5.8135	4	2	2	1	1	2	Q9D8T7;F7DE82;F8WHU8	Q9D8T7;F7DE82;F8WHU8	SRA stem-loop-interacting RNA-binding protein, mitochondrial
Clu	2.3925	26.4948	25.6869	23.6662	23.7304	23.1415	0	18.511	9	4	4	4	3	3	Q06890;E9Q9B8;E9PUU2;E9PXG5;E9Q8Y5	Q06890	Clusterin;Clusterin beta chain;Clusterin alpha chain
Nt5c	2.39244	27.4013	27.1127	25.1426	24.5865	25.3489	0	19.05	11	5	5	4	5	3	Q9JM14;A2A9X5	Q9JM14;A2A9X5	5(3)-deoxyribonucleotidase, cytosolic type
Cct5	2.39194	29.3365	29.2576	26.9375	26.8727	25.6423	0	165.3	72	24	22	22	22	23	P80316;E0CZA1	P80316	T-complex protein 1 subunit epsilon
Prkcb	2.39192	26.7966	26.7682	24.4226	24.3584	22.9049	0	34.355	25	9	9	9	8	9	P68404	P68404	Protein kinase C beta type
Arfgap2	2.39154	22.1938	21.6472	19.1488	19.9091	18.4116	0	4.6836	1	1	1	1	0	1	Q99K28	Q99K28	ADP-ribosylation factor GTPase-activating protein 2
Psmf1	2.39058	21.327	21.6494	19.1199	19.0752	19.5777	0	6.9726	2	1	1	1	1	1	Q8BHL8	Q8BHL8	Proteasome inhibitor PI31 subunit
Ppp2r1a	2.39041	28.7454	28.7565	26.5506	26.1704	25.0048	0	71.498	45	18	15	16	18	17	Q76MZ3;G3UWL2;G3UXQ1;H3BK50;H3BJ83	Q76MZ3	Serine/threonine-protein phosphatase 2A 65 kDa regulatory subunit A alpha isoform
Prdx3	2.39009	28.2485	27.8816	25.7021	25.6479	25.2393	0	34.043	24	7	7	6	6	5	P20108	P20108	Thioredoxin-dependent peroxide reductase, mitochondrial
Col4a2	2.38966	22.5949	22.5967	19.96	20.4523	17.4418	0.004212	1.9778	1	1	1	1	1	1	P08122	P08122	Collagen alpha-2(IV) chain;Canstatin
Slc2a3	2.38857	27.3949	27.3456	25.1527	24.8107	25.1648	0	39.124	19	7	7	7	6	5	P32037	P32037	Solute carrier family 2, facilitated glucose transporter member 3
Ube2i	2.38839	26.8959	27.4996	24.7681	24.8505	25.8914	0	62.519	24	8	6	8	7	7	P63280;Q8CFZ0;G3UYP0;G3UZL6	P63280;Q8CFZ0;G3UYP0	SUMO-conjugating enzyme UBC9
Stip1	2.38808	29.6653	29.6591	27.2853	27.2628	25.8269	0	152.95	77	24	22	24	21	23	Q60864	Q60864	Stress-induced-phosphoprotein 1
Eif3c	2.38783	28.3985	27.9616	25.9154	25.669	24.0547	0	53.881	32	13	13	12	11	11	Q8R1B4;M0QWV3	Q8R1B4	Eukaryotic translation initiation factor 3 subunit C
Bsg	2.38773	26.7836	26.7248	24.2227	24.5103	23.76	0	14.951	12	4	3	4	3	3	P18572;J3QP71;K3W4Q8	P18572;J3QP71;K3W4Q8	Basigin
Dock10	2.38748	26.0982	25.8522	23.5561	23.6193	20.4376	0	31.967	15	8	7	8	6	6	Q8BZN6;A0A087WRP5;A0A087WQ86;E9QM99;A0A0R4J2B7;Q8BLX9;A0A087WQA1;A0A087WS26	Q8BZN6;A0A087WRP5;A0A087WQ86;E9QM99;A0A0R4J2B7	Dedicator of cytokinesis protein 10
Eif4g1	2.38741	26.519	26.174	23.8467	24.0714	21.5637	0	25.06	20	11	9	10	8	7	Q6NZJ6;E9PVC5;E9Q9E1;E9PVC6;A0A0J9YUS5;E9Q770;A0A0J9YUC1;A0A0J9YVC1;D3YWM1;D3YWC6;A0A338P758;D3Z439;Q80XI3;A0A0J9YU44;D3YWY7;A2AMI7;A0A0J9YTV0;A0A0J9YUL1;Z4YKC4;A0A0R4J112;A2AMI2;A0A0N4SVL0;D6RCH1	Q6NZJ6;E9PVC5;E9Q9E1;E9PVC6;A0A0J9YUS5;E9Q770;A0A0J9YUC1;A0A0J9YVC1	Eukaryotic translation initiation factor 4 gamma 1
Sgta	2.38649	25.1434	24.2421	22.8049	21.8076	22.432	0	5.4416	3	4	3	3	3	2	Q8BJU0;A0A1W2P6P1;A0A1W2P7I5	Q8BJU0;A0A1W2P6P1;A0A1W2P7I5	Small glutamine-rich tetratricopeptide repeat-containing protein alpha
Exoc4	2.38632	22.5669	22.6767	19.8859	20.5851	18.0073	0	3.4815	1	1	1	1	0	1	O35382;Q8C391;Q9CXE1	O35382;Q8C391;Q9CXE1	Exocyst complex component 4
Esyt1	2.3855	28.6927	28.3517	26.3602	25.9132	24.2011	0	106.12	74	25	24	24	22	22	Q3U7R1	Q3U7R1	Extended synaptotagmin-1
Snapin	2.38511	24.5078	24.1095	21.8721	21.9749	22.4031	0	6.8928	1	2	2	2	2	2	Q9Z266	Q9Z266	SNARE-associated protein Snapin
Stat1	2.38499	29.5862	29.2863	27.1224	26.9801	25.4478	0	98.281	70	23	22	20	17	19	Q8C3V4;A0A087WSP5;P42225;Q99K94;A0A087WSQ5;Q8CFQ1;A0A087WRI1	Q8C3V4;A0A087WSP5;P42225;Q99K94	Signal transducer and activator of transcription;Signal transducer and activator of transcription 1
Pon3	2.3846	24.3922	23.7361	21.932	21.4272	21.6511	0	9.0711	3	2	2	2	2	1	Q62087	Q62087	Serum paraoxonase/lactonase 3
Vwa5a	2.38299	27.0509	26.8099	24.5884	24.5065	22.7615	0	33.108	27	10	10	10	9	9	Q99KC8;F6TIL5;Q8BGF0	Q99KC8	von Willebrand factor A domain-containing protein 5A
Rps9	2.38263	29.3948	28.9231	27.048	26.5046	26.9728	0	20.464	32	9	9	9	9	8	Q6ZWN5;F7CJS8;D3YWH9;Q9CXW7;D3Z673;D3YUV6	Q6ZWN5;F7CJS8;D3YWH9;Q9CXW7	40S ribosomal protein S9
	2.38178	23.953	23.2707	20.566	21.8942	22.338	0	4.4392	1	1	1	1	1	1	A0A140T8P6;P01635	A0A140T8P6;P01635	Ig kappa chain V-V region K2
Cct4	2.38159	28.5631	28.467	26.2496	26.0174	24.7254	0	88.329	54	17	17	17	15	13	P80315;G5E839;G3UYW5	P80315;G5E839	T-complex protein 1 subunit delta
Lgals1	2.38084	30.1262	30.2561	27.864	27.7566	28.276	0	107.12	40	7	7	7	7	7	P16045;A0A2R8VHJ0	P16045	Galectin-1
Add1	2.37973	26.6453	26.4959	24.2302	24.1515	23.0709	0	31.431	20	9	8	9	7	7	Q9QYC0;F8WHZ9;F8WGR0;E9Q1K3;F6V4G5;F6RDR0;D3Z0T1;A0A0J9YVI4;Q9QYB8	Q9QYC0;F8WHZ9;F8WGR0;E9Q1K3	Alpha-adducin
Copg2	2.3789	23.1582	23.1096	21.0725	20.4376	18.8698	0.0032479	2.2809	2	1	1	1	1	1	Q9QXK3	Q9QXK3	Coatomer subunit gamma-2
Snx18	2.37863	24.5289	24.8024	22.3617	22.2123	21.6032	0	8.609	7	5	4	5	4	4	Q8C788;Q91ZR2	Q8C788;Q91ZR2	Sorting nexin;Sorting nexin-18
Rpl18	2.37751	29.3132	29.0376	26.7361	26.8597	27.6277	0	25.134	18	6	6	6	5	6	P35980;A0A1B0GSS8;A0A1B0GQU8;A0A1B0GSA8;A0A1B0GSF7;A0A1B0GRZ3;A0A1B0GS28	P35980;A0A1B0GSS8;A0A1B0GQU8;A0A1B0GSA8;A0A1B0GSF7	60S ribosomal protein L18
Dlgap4	2.37674	25.0409	24.8524	22.0336	23.1062	20.76	0	5.4085	2	2	2	2	1	2	B1AZP2;I1E4X0;F6YMR0;E9PUF2;B7ZNS2;H3BKJ0;H3BJD4;H3BJW9	B1AZP2;I1E4X0;F6YMR0;E9PUF2;B7ZNS2;H3BKJ0;H3BJD4;H3BJW9	Disks large-associated protein 4
Thoc2	2.3766	21.3646	21.6437	19.0102	19.2449	16.5167	0.0045407	1.951	4	1	1	1	1	1	B1AZI6	B1AZI6	THO complex subunit 2
Ppic	2.37604	20.7656	20.5628	18.2012	18.3751	18.4624	0.0025353	2.3093	2	1	1	1	1	1	P30412	P30412	Peptidyl-prolyl cis-trans isomerase C
Enpp4	2.37478	26.0902	24.406	22.7985	22.9481	22.3786	0	11.81	10	5	5	4	3	3	Q8BTJ4;Q3TIW9;A0A6I8MWV7	Q8BTJ4	Bis(5-adenosyl)-triphosphatase enpp4
Ifi47	2.37408	28.466	28.1806	26.0065	25.892	24.94	0	49.954	45	14	14	14	13	12	Q61635;A0A1L1SQM2;Q5SVP0;A6PWD6;Q5NCB2;Q5SVP2;Q5NCB3	Q61635;A0A1L1SQM2
Abcb6	2.37373	23.3815	20.7636	19.8344	19.5633	18.5993	0	7.8901	2	2	2	1	0	0	Q9DC29	Q9DC29	ATP-binding cassette sub-family B member 6, mitochondrial
Ppil1	2.37371	24.9591	25.3911	22.7492	22.8536	23.4433	0	4.2797	4	3	2	3	3	2	Q9D0W5	Q9D0W5	Peptidyl-prolyl cis-trans isomerase-like 1
Etf1	2.37317	24.0405	24.5615	21.5396	22.3161	20.9398	0	5.391	3	3	3	3	2	2	Q8BWY3	Q8BWY3	Eukaryotic peptide chain release factor subunit 1
Cpsf4	2.37171	22.0921	21.9434	19.4717	19.8204	19.8165	0.0021898	2.4171	2	1	1	1	1	1	Q8BQZ5;M0QWM8;B2LVG5;B2LVG6;E0CXT7	Q8BQZ5;M0QWM8;B2LVG5;B2LVG6;E0CXT7	Cleavage and polyadenylation specificity factor subunit 4
Eef1d	2.37168	26.2243	26.1164	23.7457	23.8516	23.4262	0	14.865	4	1	1	1	1	1	A0A0R4J1L2;Q91VK2;F6ZFU0;D3Z7N2;D3YY68;D3YZT9	A0A0R4J1L2;Q91VK2;F6ZFU0;D3Z7N2;D3YY68;D3YZT9
Sec24b	2.37126	24.637	24.613	22.5724	21.9351	20.5281	0	11.25	3	4	3	4	4	2	Q80ZX0;F6VJC5	Q80ZX0
Alox12	2.37122	29.2504	29.0634	26.9867	26.5846	25.2874	0	82.584	39	17	17	17	16	14	P39655;Q8C587	P39655	Arachidonate 12-lipoxygenase, 12S-type
Cops4	2.37041	24.3949	24.0294	21.8923	21.7911	20.7766	0	2.9874	1	2	2	2	1	2	O88544;D3Z1R9;D3YV99;F6QTS1	O88544;D3Z1R9;D3YV99;F6QTS1	COP9 signalosome complex subunit 4
Rbbp7	2.37002	27.7808	27.5709	25.2361	25.3756	24.9345	0	38.614	27	10	9	10	7	8	Q60973;A2AFI9;A2AFJ1;F6ZLC6;F6U539	Q60973;A2AFI9;A2AFJ1	Histone-binding protein RBBP7
Rgs18	2.36976	24.8379	24.7292	22.5233	22.3043	21.9528	0	4.4564	4	3	3	3	3	3	Q99PG4	Q99PG4	Regulator of G-protein signaling 18
Ndufs7	2.36975	25.1594	24.7234	22.7831	22.3602	22.7534	0	11.345	5	2	2	2	2	2	Q9DC70	Q9DC70	NADH dehydrogenase [ubiquinone] iron-sulfur protein 7, mitochondrial
Rpl27a	2.36934	28.5463	28.4932	26.1313	26.1696	26.9679	0	10.354	7	5	4	4	5	5	P14115	P14115	60S ribosomal protein L27a
Rtcb	2.36917	27.6722	27.1062	25.0228	25.0172	24.0826	0	34.41	25	12	12	11	9	9	Q99LF4	Q99LF4	tRNA-splicing ligase RtcB homolog
Tomm20	2.36902	25.0923	24.7651	22.4153	22.704	23.871	0	4.2229	5	2	2	2	1	1	Q9DCC8;A0A1D5RLZ6	Q9DCC8;A0A1D5RLZ6	Mitochondrial import receptor subunit TOM20 homolog
Ppp1r7	2.36829	26.0502	26.3946	23.5976	24.1105	23.0977	0	17.165	11	7	6	7	6	6	Q3UM45;A0A087WRA7	Q3UM45	Protein phosphatase 1 regulatory subunit 7
Arhgap6	2.3674	22.953	22.6512	20.7177	20.1518	18.4838	0	5.1299	5	2	2	2	2	2	O54834;A2ALX6;A2ALX7;G3UZI7	O54834;A2ALX6;A2ALX7;G3UZI7	Rho GTPase-activating protein 6
Eif1;Eif1b	2.36713	27.5286	27.3015	25.2982	24.7976	26.356	0	36.81	19	5	5	5	5	5	P48024;Q9CXU9;A0A1L1SSA3;J3QN87;J3QPZ8	P48024;Q9CXU9;A0A1L1SSA3	Eukaryotic translation initiation factor 1;Eukaryotic translation initiation factor 1b
Capg	2.36699	28.4042	28.8922	26.2953	26.2671	26.2206	0	157.09	51	10	9	10	10	10	Q99LB4;P24452;D3YTL5;D3YZN3;D3YU77;D3Z014;D3Z4K5	Q99LB4;P24452;D3YTL5	Macrophage-capping protein
Actr2	2.3668	30.4484	30.4018	28.189	27.9276	27.9815	0	84.791	80	14	14	14	14	12	P61161	P61161	Actin-related protein 2
Smap2	2.36667	25.3843	25.5851	22.8265	23.4095	22.8412	0	22.002	13	5	4	5	4	4	Q7TN29	Q7TN29	Stromal membrane-associated protein 2
Fam98b	2.36618	24.7734	24.7	22.1079	22.6332	21.6748	0	7.5739	4	3	3	3	2	3	Q80VD1	Q80VD1	Protein FAM98B
	2.36616	22.1879	25.1337	20.3929	22.1963	20.3002	0	4.4687	4	3	1	3	1	3	P0DOV2;E9Q3L4;D3Z2E7;G3UXS8;G3UZV2	P0DOV2
Tapbp	2.36616	28.8168	28.55	26.2814	26.3531	25.5521	0	43.339	45	10	9	10	10	10	Q9R233;Q3TCU5;G3UZZ2;A0A3Q4EGL0	Q9R233;Q3TCU5;G3UZZ2;A0A3Q4EGL0	Tapasin
Dnajc3	2.36577	26.3564	25.9922	24.1189	23.4983	22.9216	0	36.963	18	7	7	7	6	3	Q91YW3	Q91YW3	DnaJ homolog subfamily C member 3
Npc1	2.36576	27.6029	26.7514	25.1645	24.4583	23.4475	0	21.092	21	6	6	6	6	6	O35604	O35604	Niemann-Pick C1 protein
Lyn	2.36525	28.3781	28.2687	26.0791	25.8371	24.8261	0	55.613	41	14	14	14	14	13	P25911;P16277	P25911	Tyrosine-protein kinase Lyn
Dnaja1	2.3652	27.4745	27.0715	25.031	24.7846	24.1493	0	44.627	17	9	8	7	6	7	P63037;B1AXY1;B1AXY0;B1AXX9	P63037	DnaJ homolog subfamily A member 1
F10	2.36458	24.6921	23.8716	21.7794	22.0551	21.1279	0	7.1657	4	2	2	2	1	2	O88947;Q3U3V1	O88947;Q3U3V1	Coagulation factor X;Factor X light chain;Factor X heavy chain;Activated factor Xa heavy chain
Pdlim7	2.3639	25.0484	24.1356	22.3543	22.102	21.1538	0	7.4858	6	3	3	2	2	2	Q3TJD7;B8JJB1;B8JJB2;B8JJB3;Q8BVJ7	Q3TJD7	PDZ and LIM domain protein 7
Hm13;H13	2.3629	24.5747	24.4207	22.1191	22.1505	21.7557	0.0011058	2.4836	2	1	1	1	1	1	Q9D8V0;Q6PGJ8;A3KGR9	Q9D8V0;Q6PGJ8;A3KGR9	Minor histocompatibility antigen H13
Lrrfip1	2.36263	28.0856	27.6934	25.3422	25.7115	24.0714	0	83.864	29	11	11	11	9	11	Q3UZ39;G5E8E1;A0A087WPK3;E9Q9T1;A0A087WSF5;A0A087WNU6;A0A668KLE1;A0A1L1SSC0;A0A0G2JFV5;A0A087WPT0;Q91WK0;E9QN52;A0A1L1SQW1;A0A0R4J169;A0A1L1SVG1;A0A0G2JGZ1;A0A0G2JDR6;A0A0G2JEP4	Q3UZ39	Leucine-rich repeat flightless-interacting protein 1
Itga6	2.36245	27.3495	27.2435	25.1234	24.7448	22.7228	0	49.352	29	14	13	14	14	13	Q61739;A0A5F8MPB5;F6VSK8	Q61739;A0A5F8MPB5;F6VSK8	Integrin alpha-6;Integrin alpha-6 heavy chain;Integrin alpha-6 light chain
Cops3	2.36202	24.7973	24.5405	22.3901	22.2236	21.2866	0	10.365	8	2	2	2	2	2	O88543;D3Z036	O88543;D3Z036	COP9 signalosome complex subunit 3
0610011F06Rik	2.36191	21.4046	21.4928	20.0054	18.1682	19.0537	0	3.9494	4	1	1	1	1	1	Q9DCS2;E9Q5B2;G5E8X1	Q9DCS2;E9Q5B2;G5E8X1	UPF0585 protein C16orf13 homolog
Gclm	2.36152	25.2509	24.7768	22.8635	22.4412	22.8297	0	10.927	6	2	2	2	2	2	O09172;A0A0G2JDI4;H3BJA3;F6VNW5	O09172;A0A0G2JDI4;H3BJA3;F6VNW5	Glutamate--cysteine ligase regulatory subunit
Erp29	2.36071	28.5512	28.3365	25.8398	26.3264	26.1222	0	33.421	35	9	9	9	8	9	P57759;F8WJI4;F8WIM7;D6RG87	P57759	Endoplasmic reticulum resident protein 29
Nop56	2.36017	29.0539	28.665	26.5397	26.4588	25.173	0	77.684	54	17	15	14	15	17	Q9D6Z1;E0CXZ0;F7CHQ7;F7CHP9;F6USW7;A2APD7;F6U250;F6V095	Q9D6Z1;E0CXZ0	Nucleolar protein 56
Uba1	2.35927	30.3961	30.4838	28.0384	28.123	25.9426	0	212.62	117	32	30	32	30	29	Q02053;P31254	Q02053	Ubiquitin-like modifier-activating enzyme 1
Gmfg	2.35863	25.7801	26.5468	23.889	23.7206	24.2931	0	33.253	9	3	3	3	3	2	Q9ERL7;D3Z2F6;D3YY16	Q9ERL7;D3Z2F6;D3YY16	Glia maturation factor gamma
Sptb	2.35838	26.5848	25.1551	23.161	23.8621	20.2884	0	41.315	15	11	11	9	8	10	E9Q397;Q3UGX2;P15508	E9Q397;Q3UGX2;P15508	Spectrin beta chain, erythrocytic
Rab21	2.35735	27.1843	27.0096	24.886	24.5931	24.6571	0	29.959	16	8	7	7	8	7	P35282;A0A1W2P6Z4	P35282	Ras-related protein Rab-21
Itgb6	2.35728	25.6538	25.4593	23.2415	23.1571	21.6072	0.0032028	2.1444	4	1	1	1	1	1	Q9Z0T9;B1AYG7;B1AYG6	Q9Z0T9;B1AYG7;B1AYG6	Integrin beta-6;Integrin beta
Rps23	2.3565	27.9985	27.4191	25.4271	25.2775	26.4057	0	12.542	16	4	4	4	4	3	P62267	P62267	40S ribosomal protein S23
Itgb2	2.35639	30.6101	30.7097	28.3549	28.2521	26.3331	0	193.66	79	27	26	27	25	25	P11835;Q542I8;M0QWA7;D3YYP8;D3Z1S4;M0QWJ6	P11835;Q542I8;M0QWA7	Integrin beta-2;Integrin beta
Crocc	2.356	26.3632	26.0277	23.8179	23.861	20.6282	0.0038664	1.9899	2	1	1	1	1	1	Q8CJ40	Q8CJ40	Rootletin
Npm3	2.35573	25.25	25.1948	22.7651	22.9682	23.4806	0	13.612	7	3	3	3	2	3	Q9CPP0	Q9CPP0	Nucleoplasmin-3
Pgam1	2.35567	29.8968	29.9654	27.6064	27.5444	27.4885	0	92.77	58	11	11	10	11	10	Q9DBJ1;O70250	Q9DBJ1	Phosphoglycerate mutase 1
Sptan1	2.3547	30.4428	30.1955	28.0781	27.8509	24.4221	0	323.31	172	71	68	65	61	56	P16546;E9Q447;A3KGU5;A3KGU7;A3KGU9;A3KGU4;A0A5F8MQC3	P16546;E9Q447;A3KGU5;A3KGU7;A3KGU9	Spectrin alpha chain, non-erythrocytic 1
Flii	2.35435	26.8458	26.7104	24.498	24.3496	22.0832	0	60.927	24	13	11	12	11	9	Q9JJ28	Q9JJ28	Protein flightless-1 homolog
Agps	2.35415	24.4649	23.9493	21.7923	21.9136	20.3549	0	10.989	4	4	4	3	3	3	Q8C0I1;H3BKN2;A2AL50;A2AL49	Q8C0I1;H3BKN2;A2AL50;A2AL49	Alkyldihydroxyacetonephosphate synthase, peroxisomal
Clpp	2.35341	25.038	25.4154	23.3514	22.3952	22.6009	0	13.828	5	4	2	3	4	2	O88696	O88696	ATP-dependent Clp protease proteolytic subunit, mitochondrial
Tpi1	2.35333	30.0679	30.0712	27.7662	27.6663	27.4206	0	72.673	52	13	13	13	11	11	P17751;H7BXC3	P17751;H7BXC3	Triosephosphate isomerase
Apoa1	2.3528	27.6386	26.9575	24.961	24.9294	24.782	0	15.561	16	8	8	7	7	7	Q00623;A0A1L1STX7	Q00623	Apolipoprotein A-I;Proapolipoprotein A-I;Truncated apolipoprotein A-I
Itgal	2.35245	26.8324	26.8198	24.4818	24.4656	22.2261	0	58.669	22	10	9	10	7	6	P24063;E9QNL8;E9Q5M7;D3Z627;D3YW95	P24063;E9QNL8;E9Q5M7;D3Z627;D3YW95	Integrin alpha-L
Rab2a;Rab2b	2.35229	27.3531	27.1703	24.8073	25.0115	24.7154	0	36.455	18	7	7	7	6	5	P53994;P59279;Q3TEG7;G3UXQ7;G3V022;A0A1D5RMH1	P53994;P59279;Q3TEG7	Ras-related protein Rab-2A;Ras-related protein Rab-2B
	2.35181	22.8409	22.6845	20.4023	20.4195	20.1157	0.0018409	2.465	2	1	1	1	1	1	Q8VE95;Q9D1W4	Q8VE95;Q9D1W4	UPF0598 protein C8orf82 homolog
Rps12	2.35135	29.3123	29.129	26.9456	26.793	27.6742	0	34.766	19	6	6	6	6	6	Q6ZWZ6;F7AEH4;A0A1W2P7A1;P63323	Q6ZWZ6;F7AEH4;A0A1W2P7A1;P63323	40S ribosomal protein S12
Hmha1	2.35079	28.0343	27.9243	25.6078	25.6492	23.8809	0	64.221	42	18	17	16	15	16	Q3TBD2;G3X9Q3;D3Z7R7	Q3TBD2;G3X9Q3;D3Z7R7	Minor histocompatibility protein HA-1
Stx8	2.35036	27.2745	26.726	25.0592	24.2406	24.8303	0	31.41	17	6	6	6	6	5	O88983;Q9D0J1;Q8BS59	O88983	Syntaxin-8
Slc12a9	2.35011	24.5922	24.4415	22.3992	21.9343	20.6925	0	21.604	9	3	3	3	3	3	Q99MR3	Q99MR3	Solute carrier family 12 member 9
Thbs1	2.35	33.3895	32.8818	30.9406	30.6307	28.414	0	323.31	262	51	51	49	47	50	Q80YQ1;P35441;CON__Q28194;Q03350	Q80YQ1;P35441	Thrombospondin-1
Dpp3	2.34933	25.8599	25.8654	23.5859	23.4408	21.9515	0	37.189	10	7	6	7	5	5	Q99KK7;A0A494BBC1;A0A494BBB3;A0A494B918;A0A494BA16	Q99KK7;A0A494BBC1	Dipeptidyl peptidase 3
Slc25a12	2.34901	27.6985	27.277	25.2335	25.044	23.5897	0	59.383	35	9	9	9	8	7	Q8BH59;V9GXX9	Q8BH59	Calcium-binding mitochondrial carrier protein Aralar1
Scp2	2.34894	28.6334	28.6427	26.1361	26.4421	25.313	0	43.292	40	9	9	9	8	9	P32020	P32020	Non-specific lipid-transfer protein
Hsp90aa1	2.34881	30.061	29.9442	27.6693	27.6383	26.2178	0	154.16	73	22	22	20	19	20	P07901;B7ZC50;A2A6A2;B7ZC49	P07901	Heat shock protein HSP 90-alpha
Mvp	2.34853	28.1174	27.8731	25.8088	25.4847	23.7679	0	69.682	38	17	15	15	14	13	Q9EQK5;E9Q3X0;D3Z2N7	Q9EQK5;E9Q3X0	Major vault protein
Fermt3	2.34841	31.2624	30.9184	28.8872	28.5968	27.0734	0	241	112	29	28	29	26	28	Q8K1B8;A0A494B9W3;A0A494BBJ8;A0A494B9F7	Q8K1B8;A0A494B9W3	Fermitin family homolog 3
Glg1	2.34839	25.3024	25.1288	22.4957	23.2387	20.5774	0	17.479	6	4	4	4	3	4	Q61543;F8WHM5;E9PWD8;F6RSH1	Q61543;F8WHM5;E9PWD8;F6RSH1	Golgi apparatus protein 1
Impa1	2.34811	27.2845	27.3828	24.9476	25.0235	24.5931	0	25.147	17	9	8	8	6	7	Q924B0;O55023;Q80ZJ2;A0A0A6YW07;D3Z703	Q924B0;O55023;Q80ZJ2	Inositol monophosphatase 1
Ada	2.34794	26.475	26.5089	24.0197	24.2683	23.2922	0	19.469	15	6	6	6	4	4	P03958	P03958	Adenosine deaminase
Cd82	2.34763	26.8321	26.5465	24.3869	24.2965	24.4947	0	13.331	9	3	3	3	2	2	P40237;A2AIJ1;A2AIJ2	P40237;A2AIJ1	CD82 antigen;Tetraspanin
Mzb1	2.3473	27.1118	26.5352	24.1384	24.814	24.9428	0	28.04	17	6	6	6	5	5	Q9D8I1;A0A494B9S2	Q9D8I1	Marginal zone B- and B1-cell-specific protein
2015-09-01	2.34726	26.1429	26.1216	23.7124	23.8576	24.2215	0	9.1858	9	4	4	4	4	4	Q9ERR7;A0A0R4J0K1;A0A0G2JEF3;A0A1C7ZMY4	Q9ERR7;A0A0R4J0K1	15 kDa selenoprotein
Mat2a	2.34645	25.4	25.597	23.3956	22.9086	22.5938	0	7.0872	4	3	3	3	2	2	Q3THS6;A0A0U1RNT6;A0A0U1RNK6;A0A0U1RQ95	Q3THS6;A0A0U1RNT6;A0A0U1RNK6	S-adenosylmethionine synthase isoform type-2
B2m	2.34617	29.024	28.8091	26.5369	26.6039	27.3716	0	20.894	10	3	3	3	3	3	P01887	P01887	Beta-2-microglobulin
Celf2	2.34591	26.3045	26.2315	24.0252	23.819	23.4406	0	17.086	13	4	4	4	4	4	Q9Z0H4;A0A0R4J2B0;V9GX43;S4R2U7;S4R1S7;E9QA47;S4R2J2;S4R2L5;A3KGT0;S4R2S7	Q9Z0H4;A0A0R4J2B0;V9GX43;S4R2U7;S4R1S7;E9QA47;S4R2J2;S4R2L5;A3KGT0;S4R2S7	CUGBP Elav-like family member 2
Cpne1	2.34576	27.3503	27.1105	25.1367	24.6325	24.0378	0	38.849	28	9	8	9	8	8	Q8C166;B7ZCP4;B7ZCP6;E9Q806;B7ZCP7;B7ZCP5;A3KGK7;V9GWY2;V9GX86;B7ZCP8;F6R587	Q8C166;B7ZCP4;B7ZCP6;E9Q806	Copine-1
Dynll1	2.34564	25.5249	25.4766	23.2935	23.0167	24.4392	0	15.01	4	1	1	1	1	1	P63168;Q80ZS7	P63168	Dynein light chain 1, cytoplasmic
Idh3a	2.34544	28.863	28.3924	26.3145	26.2499	25.5105	0	45.784	36	10	10	10	9	9	Q9D6R2;A0A1L1STE6	Q9D6R2;A0A1L1STE6	Isocitrate dehydrogenase [NAD] subunit alpha, mitochondrial
Tubb4b;Tubb4a	2.34541	32.4481	32.3817	30.1927	29.9463	29.3533	0	314.15	186	25	25	25	24	24	P68372;Q9D6F9;G3UZR1	P68372;Q9D6F9	Tubulin beta-4B chain;Tubulin beta-4A chain
Stat3	2.34532	26.1773	26.0604	23.9471	23.6	22.0954	0	38.387	12	6	6	6	6	6	P42227;B7ZC18	P42227;B7ZC18	Signal transducer and activator of transcription 3;Signal transducer and activator of transcription
Eed	2.3445	23.0522	22.4886	20.3455	20.5063	19.4091	0.003204	2.1547	2	1	1	1	1	1	Q921E6;A0A140LIG5;A0A5F8MPX8	Q921E6;A0A140LIG5;A0A5F8MPX8	Polycomb protein EED
Clptm1	2.34437	23.6172	23.2982	21.2604	20.9663	20.0251	0.0032351	2.2525	2	1	1	1	1	1	Q8VBZ3	Q8VBZ3	Cleft lip and palate transmembrane protein 1 homolog
Gnb1	2.34432	29.3087	29.029	26.97	26.679	26.7345	0	152.64	54	14	14	14	14	13	P62874;H3BKR2;H3BLF7;Q61011	P62874;H3BKR2;H3BLF7	Guanine nucleotide-binding protein G(I)/G(S)/G(T) subunit beta-1
Msr1	2.34379	22.2079	21.7932	19.9768	19.3368	18.1575	0	3.5407	1	1	1	1	0	0	P30204;A0A1B0GRS5	P30204;A0A1B0GRS5	Macrophage scavenger receptor types I and II
Pygl	2.34322	27.5475	27.8233	25.2701	25.4143	23.3359	0	40.641	30	18	16	18	13	13	Q9ET01;Q3UEJ6	Q9ET01;Q3UEJ6	Glycogen phosphorylase, liver form;Alpha-1,4 glucan phosphorylase
Pcmt1	2.34241	26.9633	26.6143	24.4242	24.4686	24.4723	0	50.319	21	7	7	7	7	7	P23506;F7D432;E9PWE0;E0CYV0;F6V9F1;F6TXE3	P23506;F7D432;E9PWE0;E0CYV0	Protein-L-isoaspartate(D-aspartate) O-methyltransferase;Protein-L-isoaspartate O-methyltransferase
Gdi1	2.34208	27.0372	26.9848	24.9562	24.3816	23.6318	0	63.421	20	9	8	8	8	8	P50396;D6RI86;B7FAU8	P50396	Rab GDP dissociation inhibitor alpha
Rpl10;Rpl10l	2.34194	28.3744	28.1832	25.9555	25.9183	26.5412	0	38.013	22	8	7	8	8	8	Q6ZWV3;I7HLV2;P86048;A0A1B0GXC3	Q6ZWV3;I7HLV2;P86048	60S ribosomal protein L10;60S ribosomal protein L10-like
Eef2	2.34175	31.4365	31.153	29.052	28.8539	27.069	0	223.08	171	35	34	34	32	32	P58252	P58252	Elongation factor 2
Ccdc50	2.34113	25.0298	25.4275	22.7513	23.0237	22.594	0	8.1221	6	3	2	3	2	2	Q810U5;F6UK66;A0A668KL36	Q810U5;F6UK66;A0A668KL36	Coiled-coil domain-containing protein 50
Ogdh	2.34101	29.2529	28.8755	26.7779	26.6684	24.8427	0	95.483	54	24	22	24	23	22	Q60597;Z4YJV4;E9Q7L0;B2RXT3;Q5SVY0	Q60597;Z4YJV4	2-oxoglutarate dehydrogenase, mitochondrial
Bop1	2.34083	24.2916	24.3583	21.9086	22.0597	20.5411	0	18.631	4	2	2	2	2	2	P97452	P97452	Ribosome biogenesis protein BOP1
Gna13	2.34061	25.9331	25.5662	23.5336	23.2845	22.3763	0	10.812	9	4	4	4	4	3	P27601;Q9D034	P27601	Guanine nucleotide-binding protein subunit alpha-13
Opa1	2.34048	25.281	25.1234	22.6357	23.0878	20.712	0	13.612	6	5	4	4	3	4	P58281;H7BX01;E0CXD1;F6U775	P58281;H7BX01;E0CXD1	Dynamin-like 120 kDa protein, mitochondrial;Dynamin-like 120 kDa protein, form S1
Dhrs4	2.34045	26.4601	25.1845	23.6776	23.2862	23.2924	0	17.618	9	6	6	4	4	3	Q99LB2;A0A2I3BRG8;A0A2I3BQ25;A0A2I3BPY3;Q9D2U3	Q99LB2;A0A2I3BRG8;A0A2I3BQ25;A0A2I3BPY3;Q9D2U3	Dehydrogenase/reductase SDR family member 4
Ass1	2.34038	27.8347	27.9175	25.6701	25.4012	24.7452	0	44.681	37	13	10	11	9	11	P16460	P16460	Argininosuccinate synthase
Rpl19	2.34027	28.4249	28.2684	26.0222	25.9906	27.0235	0	22.077	8	2	2	2	2	2	P84099;A2A547	P84099;A2A547	60S ribosomal protein L19;Ribosomal protein L19
Rps8	2.34002	30.1178	29.9728	27.7409	27.6697	28.1371	0	62.04	34	11	10	11	11	11	P62242	P62242	40S ribosomal protein S8
Rras2	2.33932	23.7931	23.3822	21.5804	20.9163	20.9594	0	7.6797	2	1	1	1	1	1	P62071;A0A1B0GRT5	P62071;A0A1B0GRT5	Ras-related protein R-Ras2
Morf4l1	2.33923	22.5719	22.1069	19.7756	20.2247	19.618	0	3.7888	4	1	1	1	1	1	P60762;A0A087WQB0	P60762;A0A087WQB0	Mortality factor 4-like protein 1
Abce1	2.33874	26.1461	25.8016	23.5688	23.7013	22.336	0	16.896	6	5	5	5	5	4	P61222	P61222	ATP-binding cassette sub-family E member 1
Gnai3	2.33818	26.1431	26.1036	23.8312	23.7391	23.477	0	34.407	8	5	5	5	5	5	Q9DC51	Q9DC51	Guanine nucleotide-binding protein G(k) subunit alpha
Hnrnpf	2.33817	30.4603	30.539	28.039	28.284	27.8544	0	122.26	66	15	15	15	13	14	Q9Z2X1;J3QM80;J3QMT0;J3QP45;J3QNH2;J3QMV8	Q9Z2X1;J3QM80;J3QMT0	Heterogeneous nuclear ribonucleoprotein F;Heterogeneous nuclear ribonucleoprotein F, N-terminally processed
Metap2	2.33807	25.8484	25.5132	23.5015	23.1839	22.3069	0	16.221	7	5	5	5	4	4	O08663;Q3UI33;Q3TMN1;M0QWM9;M0QW69;M0QW48;M0QWX0	O08663;Q3UI33;Q3TMN1;M0QWM9	Methionine aminopeptidase 2;Methionine aminopeptidase
Atp5j2	2.33781	27.2169	26.7763	24.634	24.6836	26.271	0	8.1791	10	3	3	3	3	3	P56135;F8WHP8	P56135;F8WHP8	ATP synthase subunit f, mitochondrial
Pgrmc1	2.33718	26.0243	25.6383	23.5986	23.3897	24.1032	0	26.456	15	4	4	4	4	4	O55022	O55022	Membrane-associated progesterone receptor component 1
Ehd4	2.33704	29.2125	28.9639	26.8731	26.6291	25.4471	0	75.588	57	19	19	19	18	16	Q9EQP2	Q9EQP2	EH domain-containing protein 4
Hspa4	2.33687	29.735	29.5601	27.355	27.2663	25.2665	0	207.9	83	31	29	29	27	27	Q3U2G2;Q61316	Q3U2G2;Q61316	Heat shock 70 kDa protein 4
Rap1b	2.33675	29.8667	29.6151	27.5457	27.2626	27.6853	0	90.385	24	4	4	4	4	4	Q99JI6;A0A1W2P777	Q99JI6	Ras-related protein Rap-1b
Arhgap4	2.33654	24.9135	24.8488	22.571	22.5182	20.8567	0	19.712	4	4	4	3	3	3	Q3TE27;B1AUX5;B1AUY2;Q80Z68;B1AUY3;E9Q4R3;E9PYS6;F6SL55	Q3TE27;B1AUX5;B1AUY2;Q80Z68;B1AUY3;E9Q4R3;E9PYS6
Ndufs1	2.33615	28.3922	27.9549	25.8741	25.8007	24.0558	0	97.363	51	16	15	16	15	15	Q91VD9;A0A087WQ77;A0A087WQR0	Q91VD9	NADH-ubiquinone oxidoreductase 75 kDa subunit, mitochondrial
Fabp4	2.33576	25.7241	25.6937	23.5117	23.2346	23.9708	0	7.9586	7	4	4	4	4	4	P04117	P04117	Fatty acid-binding protein, adipocyte
Lrp1	2.33493	26.7045	26.3733	24.0735	24.3345	19.9822	0	25.613	18	11	9	10	9	8	Q91ZX7;A0A0R4J0I9;Q3U5J2	Q91ZX7;A0A0R4J0I9	Prolow-density lipoprotein receptor-related protein 1;Low-density lipoprotein receptor-related protein 1 85 kDa subunit;Low-density lipoprotein receptor-related protein 1 515 kDa subunit;Low-density lipoprotein receptor-related protein 1 intracellular domain
Vcp	2.33394	31.2605	30.9947	28.8037	28.7836	26.9018	0	323.31	143	37	37	37	33	34	Q01853	Q01853	Transitional endoplasmic reticulum ATPase
Arhgap17	2.33388	27.2649	27.1928	25.0747	24.7152	23.3222	0	50.756	26	8	7	8	8	7	Q3UIA2;E9QAJ9;A0A0U1RNM6	Q3UIA2;E9QAJ9;A0A0U1RNM6	Rho GTPase-activating protein 17
Fen1	2.333	26.5435	26.6344	24.223	24.2888	23.5289	0	37.923	19	8	8	8	8	6	Q91Z50;P39749	Q91Z50;P39749	Flap endonuclease 1
Tcp1	2.33273	28.7543	28.6675	26.4458	26.3105	25.0187	0	93.813	61	19	19	19	17	16	P11983;F2Z483;A0A3B2WDE2	P11983	T-complex protein 1 subunit alpha
Eif3h	2.33026	25.0983	24.8122	22.6054	22.6445	21.9009	0	7.8602	5	3	3	3	2	2	Q91WK2	Q91WK2	Eukaryotic translation initiation factor 3 subunit H
Trpv2	2.33014	20.3815	20.4562	17.8574	18.32	16.7299	0.0085704	1.7835	2	1	1	1	1	1	Q9WTR1	Q9WTR1	Transient receptor potential cation channel subfamily V member 2
Ndufs8	2.32999	25.643	24.7627	23.0139	22.7318	22.8206	0	14.465	8	4	4	4	4	3	Q8K3J1;A0A494BAW8	Q8K3J1;A0A494BAW8	NADH dehydrogenase [ubiquinone] iron-sulfur protein 8, mitochondrial
Dnajc11	2.32938	23.6305	23.2603	21.0753	21.1567	20.0167	0	29.824	8	2	2	2	2	2	Q5U458;E9Q8B3	Q5U458;E9Q8B3	DnaJ homolog subfamily C member 11
Fgd2	2.32863	25.8744	25.7121	23.3182	23.611	21.8104	0	25.772	9	5	5	4	4	5	Q8BY35;A0A3Q4EH50	Q8BY35	FYVE, RhoGEF and PH domain-containing protein 2
Igsf10	2.32853	25.3622	25.5913	23.1681	23.1283	19.7201	0.0082759	1.8378	4	2	2	2	1	1	Q3V1M1	Q3V1M1	Immunoglobulin superfamily member 10
Adssl1	2.32732	23.7403	24.9704	22.0735	21.9826	21.201	0	16.324	4	4	3	4	3	2	P28650;J3QN31	P28650;J3QN31	Adenylosuccinate synthetase isozyme 1
Acaa2	2.32681	29.2142	29.0516	26.8997	26.7125	25.9381	0	111.4	63	17	16	17	16	15	Q8BWT1;A0A494B9J2	Q8BWT1	3-ketoacyl-CoA thiolase, mitochondrial
Pwp1	2.32635	22.2593	22.4982	19.8824	20.2223	19.1873	0.0021906	2.4253	1	1	1	1	1	1	Q99LL5;A0A1W2P7U7	Q99LL5;A0A1W2P7U7	Periodic tryptophan protein 1 homolog
Cpt1a	2.32621	25.782	25.4768	23.6114	22.995	21.7747	0	14.464	6	5	5	5	4	4	P97742;A0A494BAD3	P97742;A0A494BAD3	Carnitine O-palmitoyltransferase 1, liver isoform
Acad9	2.32611	26.7695	26.0137	24.0679	24.0631	22.5249	0	32.049	13	7	7	6	5	5	Q8JZN5;A0A0G2JDY4;A0A0G2JF25	Q8JZN5;A0A0G2JDY4	Acyl-CoA dehydrogenase family member 9, mitochondrial
Pxn	2.32598	25.9103	25.9917	23.3952	23.8548	22.3589	0	30.047	12	6	6	6	5	5	Q8VI36;F8VQ28;A0A1D5RMM8;A0A0J9YV30	Q8VI36;F8VQ28;A0A1D5RMM8;A0A0J9YV30	Paxillin
Rps13	2.32594	29.5327	29.3789	27.1785	27.0812	27.55	0	23.265	30	7	7	7	7	7	P62301;Q921R2;A0A0U1RQ71	P62301;Q921R2	40S ribosomal protein S13
Nfu1	2.32549	24.7869	24.7188	22.5274	22.3273	22.4312	0	4.4827	3	2	2	2	2	2	Q9QZ23;A0A0N4SUH8;D3Z285	Q9QZ23;A0A0N4SUH8;D3Z285	NFU1 iron-sulfur cluster scaffold homolog, mitochondrial
Rnps1	2.32506	26.9356	26.4101	24.1837	24.5119	24.3718	0	20.788	9	4	4	4	4	4	Q99M28	Q99M28	RNA-binding protein with serine-rich domain 1
Itgax	2.32505	28.4391	28.0288	26.1022	25.7156	23.6527	0	58.685	39	19	18	18	15	16	Q9QXH4;A0A0U1RNJ3	Q9QXH4	Integrin alpha-X
Gm2a	2.32437	28.6321	28.1213	26.1275	25.9771	26.6584	0	17.772	18	5	5	5	5	5	Q60648	Q60648	Ganglioside GM2 activator
Slc35a4	2.32383	25.538	24.7695	22.6753	22.9845	24.8751	0	9.4697	6	2	2	2	1	1	A0A087WQH8	A0A087WQH8
Cd38	2.32311	25.8451	25.6726	23.4414	23.4301	23.0238	0	14.047	6	3	3	3	3	3	P56528	P56528	ADP-ribosyl cyclase/cyclic ADP-ribose hydrolase 1
Rps2	2.32294	29.4585	29.3166	27.0859	27.0433	26.482	0	36.735	36	12	11	11	11	12	P25444;D3YVC1;D3YWJ3	P25444;D3YVC1;D3YWJ3	40S ribosomal protein S2
2007-09-01	2.32275	28.8149	28.5327	26.3939	26.3082	25.419	0	66.193	43	14	14	13	11	12	E9Q1G8;O55131;E9Q9F5;Q8C650;Q9DA97;A0A0R4J233;S4R2P6;A0A1W2P6J7	E9Q1G8;O55131;E9Q9F5	Septin-7
Ptprc	2.322	30.6281	30.4817	28.2613	28.2046	25.9369	0	139.24	111	30	30	28	28	27	P06800;S4R1M0;A0A0A6YXM4	P06800;S4R1M0	Receptor-type tyrosine-protein phosphatase C;Protein-tyrosine-phosphatase
Mecr	2.32182	23.5882	23.235	21.4736	20.706	20.5222	0	5.3302	2	3	3	3	3	2	Q9DCS3;A2A845	Q9DCS3;A2A845	Trans-2-enoyl-CoA reductase, mitochondrial
Rpl35	2.32179	29.0492	28.7581	26.6512	26.5126	28.5882	0	15.323	17	4	4	4	4	4	Q6ZWV7	Q6ZWV7	60S ribosomal protein L35
Vcam1	2.32133	28.8124	28.1506	26.2666	26.0537	24.3844	0	122.77	42	22	21	20	20	18	P29533;Q3UPN1;A0A0G2JFP9	P29533;Q3UPN1	Vascular cell adhesion protein 1
Commd3	2.32131	23.2272	22.8007	21.4648	19.9205	21.0029	0	9.5326	8	2	2	2	2	1	Q63829	Q63829	COMM domain-containing protein 3
Ppia	2.32102	33.1825	33.0546	30.8521	30.7429	31.0612	0	142.78	135	12	12	12	12	12	P17742;A0A1L1SST0;V9GXC1;V9GX31;A0A1L1SRX5	P17742;A0A1L1SST0	Peptidyl-prolyl cis-trans isomerase A;Peptidyl-prolyl cis-trans isomerase A, N-terminally processed
Prdx5	2.32065	29.7234	30.0482	27.5332	27.597	27.3493	0	53.837	42	8	8	8	8	8	P99029;G3UZJ4;H3BJQ7;A0A494BAZ4	P99029;G3UZJ4;H3BJQ7;A0A494BAZ4	Peroxiredoxin-5, mitochondrial
Itga2b	2.32052	31.0205	30.5577	28.6628	28.2744	26.6438	0	282.03	149	34	33	33	32	28	Q9QUM0	Q9QUM0	Integrin alpha-IIb;Integrin alpha-IIb heavy chain;Integrin alpha-IIb light chain
Sord	2.31968	28.4121	28.3545	26.3322	25.795	25.4032	0	65.813	41	12	11	12	12	11	Q64442	Q64442	Sorbitol dehydrogenase
Rab4b	2.31959	25.2504	25.0636	22.9612	22.7135	22.6164	0	7.1576	8	3	3	3	3	3	Q91ZR1	Q91ZR1	Ras-related protein Rab-4B
Eef1g	2.31946	29.1198	28.8743	26.7192	26.6359	25.6799	0	59.903	40	14	14	14	12	11	Q9D8N0	Q9D8N0	Elongation factor 1-gamma
Msn	2.31688	32.0896	31.9717	29.8065	29.621	28.2516	0	261.63	192	37	35	37	36	34	P26041	P26041	Moesin
Mdp1	2.31684	25.1236	25.1275	22.9638	22.6537	23.069	0	19.221	9	4	4	4	4	4	Q9D967	Q9D967	Magnesium-dependent phosphatase 1
Clca3a1	2.31664	22.7727	22.8153	19.8739	21.0808	18.8314	0	4.9934	6	2	2	2	1	2	Q9QX15;Q91Z28	Q9QX15;Q91Z28
Ppp6r1	2.31569	25.7138	25.157	23.2058	23.0336	21.5929	0	30.025	6	3	3	3	3	3	Q7TSI3	Q7TSI3	Serine/threonine-protein phosphatase 6 regulatory subunit 1
Hsd11b1	2.3156	23.2331	23.1486	20.7481	21.0024	20.2085	0	4.3167	3	1	1	1	1	1	P50172;Q3TJI8	P50172;Q3TJI8	Corticosteroid 11-beta-dehydrogenase isozyme 1
Hnrnph1	2.31425	28.8873	28.8125	26.323	26.7483	25.9473	0	58.356	23	10	10	9	9	10	O35737;Q8C2Q7	O35737;Q8C2Q7	Heterogeneous nuclear ribonucleoprotein H;Heterogeneous nuclear ribonucleoprotein H, N-terminally processed
Ppp1cc	2.314	24.8846	24.889	22.4258	22.7198	22.1524	0	7.1922	2	2	2	2	2	2	P63087;A0A0G2JGC1;A0A0G2JFF1	P63087;A0A0G2JGC1;A0A0G2JFF1	Serine/threonine-protein phosphatase PP1-gamma catalytic subunit
Pabpc1;Pabpc6	2.31331	29.204	28.957	26.8185	26.7159	25.1796	0	93.852	62	20	20	20	18	18	P29341;Q9D4E6;Q6PHQ9;Q62029;Q91YZ8;A3KFU5;A3KFU8;A0A2I3BR37;F6ZAX1;A2A5N3;V9GXG3;Q8C7D3	P29341;Q9D4E6	Polyadenylate-binding protein 1;Polyadenylate-binding protein
Fgd3	2.31282	22.7485	22.556	20.5391	20.1397	18.8774	0.0003827	2.9314	4	2	2	2	2	1	O88842;Q3TNB8;A0A0R4J1D9	O88842;Q3TNB8;A0A0R4J1D9	FYVE, RhoGEF and PH domain-containing protein 3
Eif4h	2.31274	26.8421	26.9581	24.6141	24.5606	24.4653	0	16.526	8	4	4	4	3	3	Q9WUK2	Q9WUK2	Eukaryotic translation initiation factor 4H
Cd47	2.31259	26.6861	26.6923	24.377	24.3762	24.9538	0	15.227	19	2	2	2	2	2	A0A2R8VI30;A0A2R8VK70;A0A2R8W6P0;Q61735;A0A2R8VJU9;D3Z187;A0A2R8VI94	A0A2R8VI30;A0A2R8VK70;A0A2R8W6P0;Q61735;A0A2R8VJU9;D3Z187;A0A2R8VI94	Leukocyte surface antigen CD47
Hck	2.31259	27.5948	27.4229	25.409	24.9836	23.9203	0	27.96	27	10	10	10	10	7	P08103;F6UND7	P08103;F6UND7	Tyrosine-protein kinase HCK;Non-specific protein-tyrosine kinase
Angel2	2.31253	21.2655	20.4075	18.7681	18.2798	17.2501	0.00038183	2.8614	2	1	1	1	1	1	Q8K1C0	Q8K1C0	Protein angel homolog 2
Prep	2.31249	25.3001	25.3188	22.938	23.0559	21.0197	0	39.74	8	5	5	5	4	5	Q9QUR6	Q9QUR6	Prolyl endopeptidase
Cpne3	2.31196	26.145	25.9809	23.9121	23.5899	22.8076	0	24.881	15	7	7	6	5	4	Q8BT60;Q8JZW4;Q9Z140;Q1RLL3;Q8BLR2;P59108;Q0VE82;Q9DC53;Q9D6C8;A0A0R4J1D0;A0A0R4J0J1;Q3UYN2	Q8BT60	Copine-3
Rpl37a	2.31129	25.9806	25.8929	23.6122	23.6387	25.2021	0	21.233	8	3	3	3	3	3	P61514;A0A1D5RL86	P61514;A0A1D5RL86	60S ribosomal protein L37a
Hadh	2.31124	25.2572	24.9223	22.8892	22.6678	22.556	0	25.729	15	6	5	6	5	5	Q61425	Q61425	Hydroxyacyl-coenzyme A dehydrogenase, mitochondrial
Skap2	2.31052	28.3504	28.3411	26.1522	25.9183	25.2896	0	75.785	44	15	14	15	13	12	Q3UND0;A0A0N4SVW8	Q3UND0	Src kinase-associated phosphoprotein 2
Cdk11b	2.31021	25.6896	25.6185	22.9952	23.6925	21.6411	0	11.649	11	6	5	6	3	5	P24788;A2A9P6;Q64434	P24788;A2A9P6	Cyclin-dependent kinase 11B
Klc1	2.3095	26.0618	25.9482	23.7847	23.6063	22.1422	0	17.98	13	5	5	5	5	5	Q7TNF4;Q5UE59;E9Q7C9;Q8CD76;A0A5F8MPZ2;O88447;Q91YS4;Q9DBS5;O88448;D3YXZ3;F6UYN4	Q7TNF4;Q5UE59;E9Q7C9;Q8CD76;A0A5F8MPZ2;O88447	Kinesin light chain 1
Cnpy2	2.30948	27.126	26.865	24.8335	24.5386	24.8074	0	22.147	15	7	7	7	5	5	Q9QXT0;A0A1W2P729	Q9QXT0;A0A1W2P729	Protein canopy homolog 2
Iars	2.30913	25.2371	24.363	22.6295	22.3523	20.19	0	9.1435	7	4	4	4	4	4	Q8BU30	Q8BU30	Isoleucine--tRNA ligase, cytoplasmic
Diaph1;Diap1	2.30846	27.3277	27.1263	24.9256	24.9116	22.5645	0	36.056	21	12	11	12	8	9	O08808;E9PXV7;E9PV41;F6XC54;D3Z074	O08808;E9PXV7;E9PV41;F6XC54;D3Z074	Protein diaphanous homolog 1
Naaa	2.30783	29.1709	28.665	26.6991	26.5212	26.2953	0	51.104	44	12	12	12	9	10	Q9D7V9;G3XA18;H3BL13	Q9D7V9;G3XA18;H3BL13	N-acylethanolamine-hydrolyzing acid amidase;N-acylethanolamine-hydrolyzing acid amidase subunit alpha;N-acylethanolamine-hydrolyzing acid amidase subunit beta
Copb2	2.30771	26.6317	26.9674	24.5851	24.3986	22.4887	0	29.775	20	9	8	9	8	8	O55029	O55029	Coatomer subunit beta
Fam213a	2.30696	22.7503	22.2148	19.957	20.3941	19.9641	0.0025427	2.3446	1	1	1	1	1	1	Q9CYH2;D3Z0A8;D3YYG8;D3Z398;D3Z252;Q3U125	Q9CYH2;D3Z0A8;D3YYG8;D3Z398;D3Z252;Q3U125	Redox-regulatory protein FAM213A
Lima1	2.30692	25.8649	25.7225	23.3788	23.5948	21.5378	0	14.653	13	5	5	4	4	3	Q9ERG0	Q9ERG0	LIM domain and actin-binding protein 1
Eml2	2.30673	26.6492	26.4265	24.405	24.0573	22.5993	0	20.614	13	5	5	5	5	5	E9QK48;Q7TNG5;D6RGM3;A0A0U1RPM7;A0A0U1RQ42	E9QK48;Q7TNG5;D6RGM3	Echinoderm microtubule-associated protein-like 2
Tbxas1	2.30657	26.0915	25.811	23.7599	23.5295	22.5229	0	21.339	8	6	6	6	5	4	P36423;F6SG79	P36423	Thromboxane-A synthase
Nhp2	2.30644	26.7308	26.5636	24.321	24.3605	25.3299	0	48.811	12	5	4	5	4	4	Q9CRB2	Q9CRB2	H/ACA ribonucleoprotein complex subunit 2
Rab7a	2.30616	29.9114	29.6391	27.4236	27.5147	27.239	0	84.575	52	14	14	14	13	14	P51150;A0A0N4SVG9;A0A0N4SVR6	P51150;A0A0N4SVG9	Ras-related protein Rab-7a
Mtap	2.30592	25.5999	25.5828	23.2571	23.3137	22.6092	0	22.3	10	6	5	6	4	4	Q9CQ65	Q9CQ65	S-methyl-5-thioadenosine phosphorylase
Gnb2	2.3054	28.7589	28.6225	26.5385	26.2321	26.2588	0	88.445	47	9	9	9	9	9	P62880;E9QKR0;D3Z1M1;D3YZX3;D3Z1T4;E9PWM7;P29387;A0A0A6YVN9;V9GWY1	P62880;E9QKR0;D3Z1M1;D3YZX3;D3Z1T4	Guanine nucleotide-binding protein G(I)/G(S)/G(T) subunit beta-2
Stk38;Stk38l	2.30502	23.3333	24.0607	21.289	21.495	20.3575	0	4.3485	4	2	1	2	1	1	Q91VJ4;A0A3B2W7L2;A0A3B2WD34;Q7TSE6	Q91VJ4;A0A3B2W7L2;A0A3B2WD34;Q7TSE6	Serine/threonine-protein kinase 38;Serine/threonine-protein kinase 38-like
Man2b1	2.3041	28.6196	28.2629	26.0864	26.1879	24.3243	0	104.7	49	19	19	18	15	14	O09159	O09159	Lysosomal alpha-mannosidase
B4galnt1	2.3031	23.8374	23.837	21.1776	21.8907	20.2528	0	11.693	8	3	3	3	2	3	Q09200;A0A1W2P6F0	Q09200;A0A1W2P6F0	Beta-1,4 N-acetylgalactosaminyltransferase 1
Ly6g6f	2.30239	26.2035	25.5567	23.7799	23.3756	23.5938	0	15.824	8	3	3	3	3	2	B2RXM6	B2RXM6
Pak2	2.30235	29.1691	29.0177	26.8715	26.7106	25.6613	0	122.98	58	18	18	18	18	18	Q8CIN4;Q61036;O88643;G5E884;A3KGC3;A3KGC4;A3KGC5;A0A0U1RQ87;S4R2K7	Q8CIN4	Serine/threonine-protein kinase PAK 2;PAK-2p27;PAK-2p34
Kpnb1	2.30227	28.7654	28.6658	26.4036	26.4231	24.6607	0	68.132	55	18	18	18	14	15	P70168	P70168	Importin subunit beta-1
Lyz2	2.30179	30.8696	30.9544	28.6178	28.6026	29.594	0	110.24	49	4	4	4	4	4	P08905	P08905	Lysozyme C-2
Ssr4	2.30169	27.8113	26.123	23.8375	25.4934	25.8812	0	15.297	17	4	4	3	2	4	Q62186;Q9D8L3	Q62186;Q9D8L3	Translocon-associated protein subunit delta
Eefsec	2.30116	23.4072	23.735	21.2109	21.329	19.8455	0	7.3013	6	4	3	3	2	2	Q9JHW4;A0A0N4SWD9;A0A0N4SUV6;A0A0N4SVA4;A0A0N4SUU3	Q9JHW4;A0A0N4SWD9;A0A0N4SUV6	Selenocysteine-specific elongation factor
Arl6ip5	2.30105	26.9628	26.8156	24.6277	24.5485	25.8354	0	21.471	22	5	5	5	5	5	Q8R5J9	Q8R5J9	PRA1 family protein 3
Anxa11	2.30076	27.8884	27.9553	25.5791	25.6632	24.941	0	39.714	21	9	9	9	9	9	P97384;D3Z7U0	P97384;D3Z7U0	Annexin A11;Annexin
Tubb1	2.30049	30.5407	29.9874	28.1212	27.8059	27.2321	0	201.49	71	17	16	16	15	15	A2AQ07;CON__ENSEMBL:ENSBTAP00000025008	A2AQ07	Tubulin beta-1 chain
Sytl4	2.30033	26.4216	25.9465	23.7964	23.9711	22.2974	0	24.692	14	8	8	6	4	6	Q9R0Q1;G3UYC6	Q9R0Q1	Synaptotagmin-like protein 4
Fam49a	2.30007	27.1452	26.748	25.0623	24.2308	24.0648	0	49.055	14	5	5	5	4	4	Q8BHZ0	Q8BHZ0	Protein FAM49A
Eef1d	2.29979	29.5008	29.3849	27.1274	27.1588	26.6231	0	77.308	39	8	8	8	8	8	P57776;E9QN08;Q80T06;A0A0R4J1E2;D3YUQ9	P57776;E9QN08;Q80T06;A0A0R4J1E2;D3YUQ9	Elongation factor 1-delta
Rap2b	2.2996	27.7715	27.1388	25.268	25.0431	25.2919	0	49.52	19	7	7	7	6	7	P61226	P61226	Ras-related protein Rap-2b
Acadl	2.29958	28.7994	28.328	26.1489	26.3794	25.5253	0	58.811	35	11	11	9	11	10	P51174;A0A0R4J083	P51174;A0A0R4J083	Long-chain specific acyl-CoA dehydrogenase, mitochondrial
Fmnl1	2.2989	29.2206	29.2597	26.9955	26.8869	24.6744	0	105.58	71	28	26	27	24	26	Q9JL26;A0A1W2P6X3;A2AB60;G3UWI1;Q6ZPF4;D3Z7A7	Q9JL26;A0A1W2P6X3;A2AB60	Formin-like protein 1
Ptgis	2.29867	22.4127	21.7965	19.5917	20.0201	18.594	0	9.3588	4	2	2	2	2	2	O35074;Q8BXC0	O35074;Q8BXC0	Prostacyclin synthase
Rpl13	2.2982	29.8774	29.6101	27.4408	27.4503	27.846	0	27.751	25	6	6	6	6	6	P47963	P47963	60S ribosomal protein L13
Hpcal1	2.29815	27.5442	27.0413	25.0791	24.9102	24.6715	0	28.85	17	7	7	6	6	5	P62748;A0A1Y7VMK3;P84075;A2A7R5;E9PV73	P62748;A0A1Y7VMK3	Hippocalcin-like protein 1
Bak1	2.29753	25.8183	25.6423	23.5138	23.3518	23.5406	0	14.747	8	3	3	3	3	3	O08734;F7CUQ1;Q91WX5	O08734;F7CUQ1;Q91WX5	Bcl-2 homologous antagonist/killer
Mpst	2.29751	23.8388	23.7955	21.4655	21.5739	21.2772	0	4.9541	4	1	1	1	1	1	Q99J99	Q99J99	3-mercaptopyruvate sulfurtransferase
Esyt2	2.29728	23.6544	23.696	21.3746	21.3812	19.5849	0.0003785	2.7783	2	3	2	3	2	2	Q3TZZ7	Q3TZZ7	Extended synaptotagmin-2
Gm11744	2.29611	25.1749	25.2429	22.9691	22.8564	23.6694	0.0042076	1.968	4	1	1	1	1	1	J3QJU7	J3QJU7
Cd81	2.29584	23.6633	23.2468	20.8354	21.4831	21.7411	0	6.6437	1	1	1	1	1	1	P35762;A0A140LJL0	P35762;A0A140LJL0	CD81 antigen
Hagh	2.29527	24.5034	24.1461	22.1243	21.9346	21.6951	0	6.1693	4	3	3	3	3	2	Q99KB8;E9PYA3;A0A0R4J052;G5E8T9;D3YWI0;E9Q2H8	Q99KB8;E9PYA3;A0A0R4J052;G5E8T9	Hydroxyacylglutathione hydrolase, mitochondrial
Ikzf3;Ikzf1	2.29505	27.2772	26.9293	24.8773	24.7391	23.5724	0	19.952	12	4	4	4	4	3	O08900;Q5SWT9;G5E8H3;Q03267;P81183;Q8C9X3;Q5SWU0;A0A087WQ51;A0A087WQ74;A0A087WNY4;A0A571BEH5;Q8C208	O08900;Q5SWT9;G5E8H3	Zinc finger protein Aiolos
Snx5	2.29414	27.9519	27.7905	25.655	25.4991	24.5561	0	47.55	34	13	13	13	12	10	Q9D8U8	Q9D8U8	Sorting nexin-5
Arhgap30	2.29388	25.1829	25.3125	23.0151	22.8925	21.0906	0	10.144	6	5	4	5	3	3	E9QMX7;Q640N3	E9QMX7;Q640N3	Rho GTPase-activating protein 30
Nudt16	2.29346	23.3955	23.0544	20.9938	20.8691	20.801	0	4.1931	5	2	2	2	2	2	Q6P3D0;A0A087WSB5;A0A087WRE5	Q6P3D0;A0A087WSB5;A0A087WRE5	U8 snoRNA-decapping enzyme
Eif3i	2.29337	27.7043	27.7003	25.6256	25.1923	24.7249	0	39.575	29	11	11	11	10	9	Q9QZD9;A2AE03	Q9QZD9	Eukaryotic translation initiation factor 3 subunit I
Ehd1	2.29302	29.1885	29.2	27.0737	26.7287	25.6059	0	114.32	70	21	19	19	19	18	Q9WVK4;Q8BH64	Q9WVK4	EH domain-containing protein 1
Ano6	2.29228	24.9908	24.7792	22.5016	22.6838	20.7991	0	13.939	6	3	3	3	2	2	Q6P9J9;A0A2I3BPX3;A0A2I3BPY8;A0A2I3BRD2	Q6P9J9;A0A2I3BPX3;A0A2I3BPY8	Anoctamin-6
Vps28	2.29179	24.9517	24.5745	22.6973	22.2453	22.3439	0	16.348	4	2	2	2	2	2	Q9D1C8;A0A2R8VKS6	Q9D1C8;A0A2R8VKS6	Vacuolar protein sorting-associated protein 28 homolog
Nop2	2.29145	26.1211	25.6201	23.6535	23.5048	22.2991	0	13.3	9	7	7	7	6	5	E9QN31;Q922K7	E9QN31;Q922K7	Probable 28S rRNA (cytosine-C(5))-methyltransferase
Ankfy1	2.29119	24.0685	23.6079	21.5223	21.5718	19.3938	0	13.809	4	2	2	2	2	2	Q810B6	Q810B6	Rabankyrin-5
Nme1	2.29115	25.3978	26.0179	23.3602	23.4731	23.6817	0	13.478	5	2	2	2	2	2	P15532	P15532	Nucleoside diphosphate kinase A
Mrps23	2.28939	24.4287	23.8485	21.7715	21.927	22.1096	0	12.023	2	2	2	2	2	2	Q8VE22;F7ARZ1;Q3TI14;A7M7Q8	Q8VE22;F7ARZ1;Q3TI14;A7M7Q8	28S ribosomal protein S23, mitochondrial
Znf326;Zfp326	2.28939	22.7875	22.2675	20.9375	19.5388	18.9618	0	7.4771	1	1	1	1	1	0	O88291;D3YXQ7;A0A0R4J098	O88291;D3YXQ7;A0A0R4J098	DBIRD complex subunit ZNF326
Prkacb	2.28911	24.2199	23.8968	21.7344	21.8041	21.1645	0	4.3683	2	2	2	2	1	2	P68181;A0A0G2JFT9;H6TMF5	P68181;A0A0G2JFT9;H6TMF5	cAMP-dependent protein kinase catalytic subunit beta
Sirt7	2.28858	26.6528	25.8351	23.9282	23.9825	23.3123	0	20.433	14	6	6	6	5	5	Q8BKJ9;A2ABY6;A2ABY8	Q8BKJ9;A2ABY6	NAD-dependent protein deacetylase sirtuin-7
	2.28835	24.3226	23.7211	21.3808	22.0862	20.6798	0	6.2241	4	2	2	2	1	2	Q8BZR9	Q8BZR9	Uncharacterized protein C17orf85 homolog
Rpl7a	2.28828	30.1772	29.933	27.7528	27.7809	27.8686	0	68.13	53	14	14	14	14	14	P12970;V9GX35	P12970	60S ribosomal protein L7a
Fam49b	2.28807	28.7905	28.7945	26.5862	26.4227	25.8137	0	100.09	47	13	13	12	12	13	Q921M7;A0A2I3BRN5;A0A2I3BPH9;A0A2I3BQK1	Q921M7;A0A2I3BRN5;A0A2I3BPH9	Protein FAM49B
Ndufa6	2.28802	26.4354	25.7955	23.8138	23.8411	24.4135	0	4.1577	5	2	2	2	2	2	Q9CQZ5;A0A2R8VI90	Q9CQZ5;A0A2R8VI90	NADH dehydrogenase [ubiquinone] 1 alpha subcomplex subunit 6
Eif3j1;Eif3j2	2.28777	27.3156	27.1073	24.8768	24.9705	24.6762	0	49.696	22	8	8	8	6	8	Q3UGC7;Q66JS6	Q3UGC7;Q66JS6	Eukaryotic translation initiation factor 3 subunit J-A;Eukaryotic translation initiation factor 3 subunit J-B
Casp7	2.28775	21.7948	21.1113	19.0493	19.2812	18.508	0.0092119	1.7475	1	1	1	1	1	1	P97864	P97864	Caspase-7;Caspase-7 subunit p20;Caspase-7 subunit p11
Vamp8	2.2875	28.9508	28.3099	26.4914	26.1943	27.3449	0	12.234	14	4	4	4	4	4	O70404;A0A0R4J0R1;A0A0U1RPE8	O70404;A0A0R4J0R1;A0A0U1RPE8	Vesicle-associated membrane protein 8
Herc4	2.2874	24.3628	24.5322	22.3649	21.9553	20.1062	0	4.8893	2	2	2	2	2	1	Q6PAV2	Q6PAV2	Probable E3 ubiquitin-protein ligase HERC4
Snap29	2.28689	26.7028	26.4095	24.1953	24.3432	24.0242	0	12.962	9	5	5	5	4	5	Q9ERB0	Q9ERB0	Synaptosomal-associated protein 29
Ndufa2	2.28563	25.4859	24.9113	23.3027	22.5232	23.6929	0	4.7432	3	2	2	2	2	1	Q9CQ75	Q9CQ75	NADH dehydrogenase [ubiquinone] 1 alpha subcomplex subunit 2
Nsf	2.28538	28.3166	28.0973	25.9374	25.9057	23.925	0	49.099	38	18	17	17	17	17	P46460;G3UX86;G3UX98	P46460	Vesicle-fusing ATPase
Tpm1	2.28421	26.1513	25.7544	24.146	23.1912	22.999	0	13.54	6	2	2	2	2	1	F8WID5;P58771;E9Q452;Q8BSH3;E9Q454	F8WID5;P58771;E9Q452;Q8BSH3;E9Q454	Tropomyosin alpha-1 chain
Cyfip2	2.28419	24.7984	24.6732	22.4939	22.4093	19.962	0	5.492	4	2	2	2	2	2	Q5SQX6;F6QD74	Q5SQX6;F6QD74	Cytoplasmic FMR1-interacting protein 2
Tmem175	2.28353	25.3531	24.4604	22.7247	22.5218	22.6485	0	5.4887	3	1	1	1	1	1	Q9CXY1;Q8BHJ8	Q9CXY1;Q8BHJ8	Transmembrane protein 175
Atp5h	2.28346	30.3874	30.0022	27.8427	27.98	28.0158	0	53.978	53	12	12	12	12	12	Q9DCX2;B1ASE2	Q9DCX2;B1ASE2	ATP synthase subunit d, mitochondrial
Tmsb10	2.2831	29.6781	29.7454	27.5178	27.3395	29.9821	0	8.7643	3	1	1	1	1	1	Q6ZWY8;A0A0N4SVF0	Q6ZWY8;A0A0N4SVF0	Thymosin beta-10
Eif5a	2.28288	30.2675	30.1965	28.029	27.8692	28.5024	0	117.81	77	14	13	14	14	14	P63242;A0A0A0MQM0;Q8BGY2;J3QPS8	P63242;A0A0A0MQM0	Eukaryotic translation initiation factor 5A-1;Eukaryotic translation initiation factor 5A
Psmb1	2.28264	28.7701	28.7192	26.5549	26.3692	26.3146	0	41.752	33	9	9	9	9	8	O09061;A0A338P7C0;A0A338P7F1	O09061;A0A338P7C0	Proteasome subunit beta type-1
Eif3m	2.28127	24.0585	24.3338	22.0181	21.8117	21.3846	0	25.787	5	2	1	2	1	1	Q99JX4;A2A702	Q99JX4;A2A702	Eukaryotic translation initiation factor 3 subunit M
Ola1	2.28117	26.6055	26.8667	24.5646	24.3453	23.3112	0	23.182	16	8	8	7	7	7	Q9CZ30;B1AYJ9	Q9CZ30;B1AYJ9	Obg-like ATPase 1
Anp32e	2.28104	27.1746	27.1827	24.8786	24.9166	25.4486	0	63.494	16	6	6	6	4	4	P97822;E9Q5H2;E9PZF5;E9Q0X5;E9Q2G1	P97822;E9Q5H2;E9PZF5	Acidic leucine-rich nuclear phosphoprotein 32 family member E
H2-D1;H2-L	2.28098	29.9843	29.6076	27.4808	27.5491	26.6167	0	41.652	39	14	13	13	12	14	P01899;G3UZP7;P01897;Q8HWB2;P01896;P01900;G3UXE9;A7VMS6;P01898;E9Q0G4;O19441;P01895;P14427;Q4KN81;E9PX63;V9GXI4;V9GXR0	P01899;G3UZP7;P01897	H-2 class I histocompatibility antigen, D-B alpha chain;H-2 class I histocompatibility antigen, L-D alpha chain
Necap2	2.28042	26.264	25.7653	23.8622	23.6063	23.4961	0	19.397	10	4	4	4	4	4	Q9D1J1;F6RCM5	Q9D1J1;F6RCM5	Adaptin ear-binding coat-associated protein 2
Isg20l2	2.28038	23.3529	22.9355	19.4145	22.3131	20.4673	0	3.4862	2	2	2	2	1	2	Q3U1G5;A0A0R4J0R3	Q3U1G5;A0A0R4J0R3	Interferon-stimulated 20 kDa exonuclease-like 2
Iglc3;Iglc2	2.27981	23.6639	23.1284	21.2437	20.9891	22.1028	0	12.622	1	1	1	1	1	1	Q99JC1;A0A0G2JGQ8;P01845;P01844	Q99JC1;A0A0G2JGQ8;P01845;P01844	Ig lambda-3 chain C region;Ig lambda-2 chain C region
Srp9	2.27915	25.8246	25.6888	23.1843	23.7708	24.226	0	8.3946	6	3	2	3	3	3	P49962;D3YZX8	P49962	Signal recognition particle 9 kDa protein
Acot2	2.27904	27.3452	27.1131	24.9225	24.9777	23.9183	0	28.485	22	10	10	9	9	9	Q9QYR9	Q9QYR9	Acyl-coenzyme A thioesterase 2, mitochondrial
Cirbp	2.27879	24.7914	24.3526	22.5216	22.0649	22.5373	0	12.733	7	3	3	3	2	2	P60824;D3YU80;K4DI65	P60824;D3YU80;K4DI65	Cold-inducible RNA-binding protein
Lars	2.27862	25.9252	25.8902	23.6582	23.6	21.2009	0	33.208	11	8	8	8	8	7	Q8BMJ2;A0A494BA98;A0A494BBF9	Q8BMJ2	Leucine--tRNA ligase, cytoplasmic
Nckap1l	2.27838	25.1907	24.7475	22.677	22.7045	20.3228	0	11.492	5	3	3	3	2	2	Q8K1X4;A0A2R8VHC4	Q8K1X4
Immt	2.27722	29.1724	28.807	26.6963	26.7286	24.7463	0	65.797	53	19	19	19	18	15	Q8CAQ8;E9Q800;E9QAY6;A0A0U1RP81;A0A1B0GX08;A0A0U1RQ14;E9PVS5	Q8CAQ8;E9Q800;E9QAY6;A0A0U1RP81	MICOS complex subunit Mic60
Inpp5d	2.27716	28.61	27.9985	26.083	25.9712	23.4319	0	117.13	60	23	23	21	16	15	Q9ES52;F7BZA7;Q6P549;A0A087WPT7	Q9ES52	Phosphatidylinositol 3,4,5-trisphosphate 5-phosphatase 1
Rps17	2.27697	29.1117	28.9092	26.8422	26.6248	27.9628	0	81.299	41	6	6	6	6	6	P63276	P63276	40S ribosomal protein S17
Cd44	2.2767	27.5808	27.4987	25.4126	25.1135	24.3528	0	23.708	17	5	4	5	4	4	P15379;Q3U8S1;A2APM5;A2APM3;A2APM4;E9QKM8;Q80X37;A2APM1;A2APM2	P15379;Q3U8S1;A2APM5;A2APM3;A2APM4;E9QKM8;Q80X37;A2APM1;A2APM2	CD44 antigen
D2Wsu81e	2.27648	23.1349	22.3372	20.5606	20.3585	19.7307	0	4.0371	1	1	1	1	1	1	Q3UHX9	Q3UHX9	Putative methyltransferase C9orf114 homolog
H2-Eb1	2.27639	27.4144	27.0885	25.0675	24.8826	24.6234	0	33.48	12	5	5	4	4	4	O78196;A0A498U6I0;P18468;P04231;P20040;P04230;P18469;P01915	O78196;A0A498U6I0;P18468;P04231;P20040;P04230	H-2 class II histocompatibility antigen, I-A beta chain;H-2 class II histocompatibility antigen, E-S beta chain;H-2 class II histocompatibility antigen, E-Q beta chain;H-2 class II histocompatibility antigen, E-B beta chain
Fam175b	2.27621	23.5236	23.7189	21.4078	21.2822	21.0876	0	3.9109	1	1	1	1	1	1	Q3TCJ1;D3Z4D8;Z4YJY0	Q3TCJ1;D3Z4D8;Z4YJY0	BRISC complex subunit Abro1
Rps5	2.2757	28.6233	28.3573	26.1992	26.23	26.5963	0	65.68	38	10	8	8	8	8	D3YYM6;D3Z1S8;Q91V55;P97461	D3YYM6;D3Z1S8;Q91V55;P97461	40S ribosomal protein S5;40S ribosomal protein S5, N-terminally processed
Tuba1a;Tuba3a	2.27506	25.2265	24.9473	22.9326	22.6911	21.972	0	7.6898	6	2	2	2	2	2	P68369;P05214	P68369;P05214	Tubulin alpha-1A chain;Tubulin alpha-3 chain
Tmed9	2.27495	27.3902	27.176	25.0743	24.942	24.8572	0	22.594	14	4	4	4	4	4	Q99KF1;A0A286YDS5;Q8R1V4	Q99KF1;A0A286YDS5	Transmembrane emp24 domain-containing protein 9
Psmb8	2.27484	27.4168	27.3496	25.0713	25.1455	24.4847	0	25.389	9	5	5	5	4	4	P28063;G3UZW8;A0A494BAB6	P28063;G3UZW8	Proteasome subunit beta type-8;Proteasome subunit beta type
Aimp2	2.27438	25.4579	25.2515	23.1998	22.9608	22.7228	0	25.452	7	3	3	3	3	3	Q8R010;Q8R3V2	Q8R010;Q8R3V2	Aminoacyl tRNA synthase complex-interacting multifunctional protein 2
Pls1	2.27365	26.7679	26.1567	24.1903	24.1869	22.5507	0	39.304	17	10	9	9	7	8	Q3V0K9;D3Z6J7	Q3V0K9	Plastin-1
Rpl12	2.27337	29.8384	29.5499	27.4163	27.4253	27.8014	0	87.659	30	6	6	6	6	6	P35979	P35979	60S ribosomal protein L12
Rras	2.27314	25.0386	24.7488	22.5129	22.7281	22.1717	0	20.064	6	3	3	3	3	3	P10833;A0A1B0GRG1	P10833;A0A1B0GRG1	Ras-related protein R-Ras
Rac1;Rac3	2.27301	29.1839	28.5596	26.8124	26.3852	27.1736	0	11.972	18	4	4	4	4	4	P63001;Q3TLP8;P60764;A2AC13	P63001;Q3TLP8;P60764	Ras-related C3 botulinum toxin substrate 1;Ras-related C3 botulinum toxin substrate 3
Mbd3	2.27292	21.9486	21.8344	19.6478	19.5894	19.2569	0	3.7355	2	1	1	1	1	1	Q9Z2D8;F6WZH1;D3YTR5;D3YTR4	Q9Z2D8;F6WZH1;D3YTR5;D3YTR4	Methyl-CpG-binding domain protein 3
Mapk14	2.27183	27.588	27.4213	25.2972	25.1685	24.6085	0	35.153	25	11	10	10	9	9	P47811;A0A3B2WB60;B2KF34;A0A3B2WAZ7	P47811;A0A3B2WB60;B2KF34	Mitogen-activated protein kinase 14
Babam1	2.27167	24.6396	24.7719	22.8553	22.0129	21.6672	0	31.422	4	3	2	3	3	2	Q3UI43	Q3UI43	BRISC and BRCA1-A complex member 1
Isoc1	2.27161	25.8891	25.8244	23.6505	23.5198	23.3215	0	9.9777	9	4	3	4	3	3	Q91V64;A0A494B952	Q91V64;A0A494B952	Isochorismatase domain-containing protein 1
Ganab	2.27143	28.6248	28.5053	26.2835	26.3038	24.3141	0	91.757	47	21	21	21	19	19	Q8BHN3	Q8BHN3	Neutral alpha-glucosidase AB
Etfdh	2.27142	27.251	26.7247	24.8003	24.6325	23.2352	0	31.826	23	12	11	10	10	8	Q921G7;Q6PF96	Q921G7;Q6PF96	Electron transfer flavoprotein-ubiquinone oxidoreductase, mitochondrial
Pepd	2.27118	25.9536	25.8603	23.8116	23.46	22.5372	0	26.029	8	5	5	5	5	4	Q11136;G3UXC5	Q11136	Xaa-Pro dipeptidase
Fundc2	2.27065	23.0238	22.1667	20.0799	20.5693	20.9226	0	8.1765	1	1	1	1	1	1	Q9D6K8	Q9D6K8	FUN14 domain-containing protein 2
Lsm14a	2.27043	25.5219	25.4774	23.0971	23.3613	22.4506	0	13.526	3	4	4	4	3	3	Q8K2F8;F6X2V9;A0A0U1RP30;A0A0U1RP90;A2BH69	Q8K2F8;F6X2V9	Protein LSM14 homolog A
Pdcd5	2.27026	25.7574	25.0386	23.3458	22.9096	23.3873	0	7.3034	7	3	3	3	2	2	P56812;D3Z7Q5	P56812;D3Z7Q5	Programmed cell death protein 5
Mgst1	2.27013	24.2202	24.5608	22.1628	22.0779	23.3488	0	4.3606	4	1	1	1	1	1	Q91VS7;D3YU60;E9QJW0	Q91VS7;D3YU60;E9QJW0	Microsomal glutathione S-transferase 1
Anxa6	2.27013	31.8574	31.5753	29.494	29.3985	27.5345	0	323.31	173	42	40	41	40	39	P14824	P14824	Annexin A6
S100a11	2.2697	28.592	28.7504	26.4599	26.3431	27.6231	0	22.056	31	4	4	4	3	3	P50543	P50543	Protein S100-A11
Pip4k2b	2.26963	25.8957	26.2246	24.0475	23.5335	23.0958	0	23.638	5	3	3	3	1	1	Q80XI4	Q80XI4	Phosphatidylinositol 5-phosphate 4-kinase type-2 beta
Tmem106b	2.26952	24.5834	23.9706	21.8588	22.1562	21.8766	0	6.2177	4	2	2	2	2	2	Q80X71;D3Z6E0;D3Z0M2;D3Z191	Q80X71;D3Z6E0;D3Z0M2;D3Z191	Transmembrane protein 106B
2006-09-01	2.26938	27.7633	28.0083	25.7589	25.474	24.7709	0	72.525	34	11	10	11	10	9	Q9R1T4;A2A3W1	Q9R1T4	Septin-6
Taldo1	2.26932	29.799	30.1333	27.6208	27.7729	27.1589	0	40.122	42	12	12	12	10	11	Q93092;A0A1B0GR11	Q93092;A0A1B0GR11	Transaldolase
Rap2c	2.26911	24.3633	23.877	21.8894	21.8127	21.8242	0	5.232	6	2	2	2	2	2	Q8BU31	Q8BU31	Ras-related protein Rap-2c
Timp3	2.26909	27.6698	27.1008	25.4341	24.7983	25.2269	0	26.491	25	6	6	6	5	5	P39876;E9QAB2	P39876	Metalloproteinase inhibitor 3
Hadhb	2.26871	29.6321	29.3448	27.3429	27.0965	26.1234	0	71.202	59	17	17	17	16	16	Q99JY0;D3YXU1	Q99JY0	Trifunctional enzyme subunit beta, mitochondrial;3-ketoacyl-CoA thiolase
Prkcd	2.26793	26.2521	26.246	24.0556	23.9066	22.3121	0	14.144	7	5	5	5	5	5	P28867;Q1MX41;Q1MX43;Q1MX40;Q1MX42;Q02111;F8WGT6	P28867;Q1MX41;Q1MX43;Q1MX40;Q1MX42	Protein kinase C delta type;Protein kinase C delta type regulatory subunit;Protein kinase C delta type catalytic subunit;Protein kinase C
Rps25	2.26788	29.4752	29.1613	27.0703	27.0304	28.2756	0	13.667	23	5	5	5	5	5	P62852;A0A1L1SQA8	P62852;A0A1L1SQA8	40S ribosomal protein S25
Brk1	2.26737	26.5489	26.425	24.7382	23.701	25.1915	0	7.0073	6	4	4	4	4	3	Q91VR8	Q91VR8	Protein BRICK1
Sfxn3	2.26609	27.5588	27.1985	25.091	25.1342	24.4125	0	41.195	20	9	9	9	8	8	Q91V61;Q3U4F0;A0A494BB84	Q91V61;Q3U4F0;A0A494BB84	Sideroflexin-3
Hbs1l;Gm9923	2.26588	20.9357	21.1731	18.7017	18.8754	17.122	0	3.0607	2	1	1	1	1	1	Q69ZS7;L7N209;A0A1W2P6V8;J3KMK0;Q3TGM7	Q69ZS7;L7N209;A0A1W2P6V8;J3KMK0;Q3TGM7	HBS1-like protein
S100a13	2.26528	26.5107	26.3169	24.2346	24.0624	25.1046	0	15.171	11	2	2	2	2	2	P97352;A0A0A0MQ90	P97352;A0A0A0MQ90	Protein S100-A13
Brox	2.26524	23.3514	23.3649	21.1093	21.0765	20.4609	0.0021946	2.4334	2	1	1	1	1	1	Q8K2Q7	Q8K2Q7	BRO1 domain-containing protein BROX
Hibch	2.26475	26.5433	26.0281	24.1591	23.8829	22.9347	0	22.046	20	6	6	6	6	5	Q8QZS1;E0CX19	Q8QZS1;E0CX19	3-hydroxyisobutyryl-CoA hydrolase, mitochondrial
Ldha	2.26462	31.2152	31.2147	29.0022	28.8985	28.3179	0	113.23	73	18	18	18	17	17	P06151;A0A1B0GSX0;A0A1B0GSR9;D3YZQ9;A0A1B0GQX5;A0A1B0GT41;A0A1B0GSL7;A0A1B0GS79;A0A1B0GRW9;A0A1B0GRS2;A0A1B0GRC1;P00342;D3YVR7;D3YZE4;A0A0N4SVV8;A0A1B0GRE9;A0A1B0GSR2;D3Z7F0	P06151;A0A1B0GSX0;A0A1B0GSR9;D3YZQ9;A0A1B0GQX5;A0A1B0GT41;A0A1B0GSL7	L-lactate dehydrogenase A chain;L-lactate dehydrogenase
Gimap4	2.26419	27.6719	27.933	25.4608	25.6157	24.9106	0	72.942	27	8	8	8	8	8	Q99JY3;D3YWB5;D3Z3F3;D6RGS2;D3Z7Q4	Q99JY3;D3YWB5	GTPase IMAP family member 4
Tmpo	2.2638	28.8117	29.1219	26.6127	26.7933	24.9252	0	71.449	21	13	11	13	9	10	Q61033	Q61033	Lamina-associated polypeptide 2, isoforms alpha/zeta
Rb1cc1	2.26346	32.5772	32.6082	30.3776	30.2808	27.3581	0.0079447	1.8468	4	1	1	1	1	1	Q9ESK9;F7CCJ3;F7CC56	Q9ESK9;F7CCJ3;F7CC56	RB1-inducible coiled-coil protein 1
2210016F16Rik	2.26333	23.54	23.3872	21.4517	20.9488	20.3497	0	3.0203	4	1	1	1	1	1	G3X8U3	G3X8U3
Psmb6	2.26246	24.9394	24.8806	23.3317	21.9635	22.7522	0	3.1059	3	2	2	2	2	1	Q60692	Q60692	Proteasome subunit beta type-6
Ctnnd1	2.26243	25.7627	25.0947	23.1488	23.1837	21.1189	0	14.628	6	6	6	5	5	6	P30999;E9Q8Z8;E9Q8Z6;E9Q8Z5;G3X9V2;E9Q986;E9Q904;E9Q901;E9Q903;D3Z2H2;E9Q8Z9;E9Q8Z4;E9Q905;E9Q907;E9Q906;D3Z7H6;D3Z2H7	P30999;E9Q8Z8;E9Q8Z6;E9Q8Z5;G3X9V2;E9Q986;E9Q904;E9Q901;E9Q903;D3Z2H2;E9Q8Z9;E9Q8Z4;E9Q905;E9Q907;E9Q906;D3Z7H6;D3Z2H7	Catenin delta-1
Ufm1	2.26206	25.8186	25.6189	23.3782	23.5352	24.9952	0	32.166	12	4	3	4	3	3	P61961;H7BWZ1;D3YW97	P61961;H7BWZ1;D3YW97	Ubiquitin-fold modifier 1
Sf1	2.26164	26.1676	26.606	23.8679	24.3824	23.4298	0	27.79	17	8	8	8	7	6	Q64213;E9Q4Q2;D3YZC9;D3YZD0;D3YVH4;F8WHF9	Q64213;E9Q4Q2;D3YZC9;D3YZD0;D3YVH4	Splicing factor 1
Mcpt8	2.26041	27.9662	27.5897	24.9991	26.036	25.3772	0	32.98	13	5	5	5	4	5	P43430;A0A286YDN6	P43430	Mast cell protease 8
Ndufa3	2.26033	25.6586	24.8844	23.1592	22.8631	24.5889	0	10.849	5	2	2	2	2	2	Q9CQ91;D3Z670	Q9CQ91;D3Z670	NADH dehydrogenase [ubiquinone] 1 alpha subcomplex subunit 3
Mdh2	2.26014	32.2171	32.0771	29.9415	29.8324	29.0299	0	112.59	80	15	15	15	15	15	P08249;A0A0G2JF23;A0A0G2JGY4	P08249	Malate dehydrogenase, mitochondrial
Slc3a2	2.25996	27.9545	27.5904	25.5111	25.5139	24.2481	0	36.212	27	10	9	10	10	10	P10852;A0A0U1RP98;A0A0U1RPK4;A0A0U1RPL8;A0A0U1RPQ7	P10852;A0A0U1RP98;A0A0U1RPK4	4F2 cell-surface antigen heavy chain
Itgb3	2.25744	30.878	30.4502	28.5347	28.2787	26.7042	0	282.8	99	25	24	24	24	22	O54890	O54890	Integrin beta-3
Parp1	2.25711	29.8187	29.638	27.4127	27.5297	25.42	0	169.08	88	32	28	30	26	26	Q921K2;P11103;A0A0A6YX03;A0A0A6YY63	Q921K2;P11103	Poly [ADP-ribose] polymerase 1
Tsta3	2.257	23.0479	23.1017	20.9855	20.65	20.2633	0	4.5161	3	1	1	1	1	1	P23591;A0A2R8W6N0;A0A2R8VKL9;A0A2R8VHD0;A0A2R8W6P6;A0A2R8VI39	P23591;A0A2R8W6N0;A0A2R8VKL9;A0A2R8VHD0;A0A2R8W6P6;A0A2R8VI39	GDP-L-fucose synthase
Atp2b1;Atp2b4	2.25671	23.6402	23.9096	21.0052	22.0312	19.4261	0	4.7525	5	2	2	2	2	2	G5E829;A0A1W2P7C7;Q6Q477;E9Q828;F7AAP4	G5E829;A0A1W2P7C7;Q6Q477;E9Q828;F7AAP4	Plasma membrane calcium-transporting ATPase 1;Calcium-transporting ATPase
Kpna4	2.25649	25.4829	25.2107	23.1663	23.0143	22.6266	0	15.99	4	3	3	3	3	2	O35343;A0A0B4J1E7;D3YTN1	O35343;A0A0B4J1E7	Importin subunit alpha-3
Anp32a	2.25608	29.2261	29.2903	26.9621	27.0421	27.3629	0	38.311	30	8	8	8	8	8	O35381;D3YYE1;D3Z7M9;F6UFG6;Q64G17	O35381;D3YYE1;D3Z7M9;F6UFG6	Acidic leucine-rich nuclear phosphoprotein 32 family member A
Tubb5	2.25604	31.0157	30.8893	28.6399	28.753	27.9061	0	58.967	40	5	5	5	5	5	P99024;A0A1D5RM76	P99024	Tubulin beta-5 chain
Acsf3	2.25578	20.6746	20.0965	18.3695	17.8901	16.5171	0.0038883	2.0451	1	1	1	1	1	1	Q3URE1	Q3URE1	Acyl-CoA synthetase family member 3, mitochondrial
Pdhb	2.25568	28.3374	27.8908	25.7941	25.9228	25.0106	0	40.471	30	9	9	8	8	9	Q9D051	Q9D051	Pyruvate dehydrogenase E1 component subunit beta, mitochondrial
Farsb	2.25558	27.1257	26.9905	24.9363	24.6688	23.2904	0	21.978	25	12	11	12	11	10	Q9WUA2;A0A087WS80;A0A087WPV4;A0A087WQ15	Q9WUA2	Phenylalanine--tRNA ligase beta subunit
Slc14a1	2.25498	24.3367	24.2541	22.4614	21.6195	22.4111	0.00038008	2.8203	4	2	2	2	2	2	Q8VHL0	Q8VHL0	Urea transporter 1
Ap3d1	2.25468	25.5192	25.1622	23.3982	22.7739	20.8228	0	18.824	15	5	5	5	4	3	O54774;A0A1W2P6Q6	O54774	AP-3 complex subunit delta-1
Cisd2	2.25312	26.1047	25.734	23.7363	23.5962	24.0343	0	5.9446	4	3	3	3	3	3	Q9CQB5;D3Z3X4	Q9CQB5;D3Z3X4	CDGSH iron-sulfur domain-containing protein 2
Cnn2	2.25208	30.1466	30.0625	27.8969	27.808	27.6797	0	101.21	74	15	15	15	14	14	Q08093;D3Z7R6	Q08093;D3Z7R6	Calponin-2;Calponin
Mcts1	2.25208	24.0647	23.7551	21.7621	21.5536	21.8704	0	5.1468	6	2	2	2	2	2	Q9DB27	Q9DB27	Malignant T-cell-amplified sequence 1
Eif4a2	2.25175	25.1647	25.0225	22.8186	22.8651	21.8465	0	12.249	4	2	2	2	2	2	P10630;Q8BTU6;A0A338P6X5;E9Q561;D6RJ60;D6RJ11	P10630;Q8BTU6;A0A338P6X5;E9Q561	Eukaryotic initiation factor 4A-II;Eukaryotic initiation factor 4A-II, N-terminally processed
Tpm4	2.25135	31.3907	31.0882	29.1544	28.8219	28.6158	0	146.2	61	16	16	16	15	15	Q6IRU2;A0A571BEU1	Q6IRU2;A0A571BEU1	Tropomyosin alpha-4 chain
Dazap1	2.25069	27.4313	27.5049	25.1295	25.3053	25.4222	0	34.321	19	7	7	6	6	6	Q9JII5;Q3UGB5;D3Z4J1	Q9JII5;Q3UGB5;D3Z4J1	DAZ-associated protein 1
Capzb	2.25053	26.4314	26.4521	24.3882	23.9941	23.6318	0	4.6391	1	1	1	1	1	1	P47757;A0A0A0MQI9;F6YHZ8	P47757	F-actin-capping protein subunit beta
Ostf1	2.25052	29.0249	28.9771	26.7179	26.7831	26.6915	0	66.671	33	7	7	7	7	7	Q62422;A0A494BA97	Q62422;A0A494BA97	Osteoclast-stimulating factor 1
Srsf9	2.25051	25.8783	25.4042	23.4741	23.3073	23.026	0	9.6508	7	4	4	4	4	3	Q9D0B0;F6RTE1	Q9D0B0	Serine/arginine-rich splicing factor 9
Banf1	2.24983	28.4937	28.2886	26.1636	26.1191	27.0846	0	18.865	18	4	4	3	4	4	O54962	O54962	Barrier-to-autointegration factor;Barrier-to-autointegration factor, N-terminally processed
Lamp1	2.2497	30.6296	29.5854	27.9717	27.7439	27.3729	0	28.662	30	5	5	5	5	4	P11438	P11438	Lysosome-associated membrane glycoprotein 1
Hspd1	2.24963	31.7146	31.3676	29.2323	29.3507	27.7809	0	268.9	141	31	31	31	30	31	P63038;D3Z2F2;D3Z7J9	P63038	60 kDa heat shock protein, mitochondrial
Acot7	2.24922	25.1797	24.8723	22.7037	22.8499	21.9162	0	4.5863	4	2	2	2	2	2	Q91V12;E9PYH2	Q91V12;E9PYH2	Cytosolic acyl coenzyme A thioester hydrolase
Galnt2	2.24856	21.9519	21.7719	19.7603	19.4664	18.1868	0.00075415	2.7181	3	1	1	1	1	1	Q6PB93	Q6PB93	Polypeptide N-acetylgalactosaminyltransferase 2;Polypeptide N-acetylgalactosaminyltransferase 2 soluble form
Zmpste24	2.24822	24.1861	24.6716	22.1959	22.1653	21.4733	0	17.135	6	3	2	3	3	3	Q80W54;I7HIP5	Q80W54	CAAX prenyl protease 1 homolog
Hnrnpdl	2.24782	25.1362	25.2051	22.8383	23.0073	22.5402	0	5.9432	8	3	3	3	3	3	Q9Z130;D3YTQ3;F6VQH5	Q9Z130;D3YTQ3;F6VQH5	Heterogeneous nuclear ribonucleoprotein D-like
Timm50	2.246	26.0625	25.7345	23.598	23.7069	23.0948	0	11.584	9	4	4	4	4	4	Q9D880	Q9D880	Mitochondrial import inner membrane translocase subunit TIM50
Polr2c	2.24591	22.6386	22.8342	20.2216	20.7593	20.2122	0.0082816	1.838	2	1	1	1	1	1	P97760;A0A1D5RLD4;A0A1D5RML8	P97760;A0A1D5RLD4;A0A1D5RML8	DNA-directed RNA polymerase II subunit RPB3
Ppm1b	2.24566	23.7747	24.5509	21.9013	21.933	21.0893	0	7.3268	3	3	2	3	1	1	P36993;Q99NF7	P36993;Q99NF7	Protein phosphatase 1B
Canx	2.24559	30.4782	30.2852	28.0776	28.1946	26.6606	0	118.73	94	22	22	22	20	22	P35564	P35564	Calnexin
Tln1	2.245	34.2316	34.027	32.0212	31.7473	28.3435	0	323.31	709	118	115	117	114	113	P26039;A2AIM2;Q71LX4;E9PUM4;A0A1L1SQ51;Q8CDM9;A0A1L1SRI1;F6SX70;F6S1V7;A0A1L1SQP9	P26039	Talin-1
Esd	2.24477	28.1862	28.149	25.8166	26.0291	25.6372	0	60.763	30	11	10	10	8	10	Q9R0P3;H3BJP2;H3BLJ9;H3BJL6;H3BKH6;H3BK43;H3BJC6;H3BL99	Q9R0P3;H3BJP2;H3BLJ9;H3BJL6;H3BKH6;H3BK43	S-formylglutathione hydrolase
Hn1l	2.24463	24.6792	25.0256	21.9889	23.2266	22.7009	0	9.7802	3	2	2	2	1	2	Q6PGH2	Q6PGH2	Hematological and neurological expressed 1-like protein
Inf2	2.24454	25.2533	25.0282	23.1402	22.6523	20.8392	0	38.566	8	5	5	5	4	3	E9QLA5;Q0GNC1;A0A1Y7VM80	E9QLA5;Q0GNC1;A0A1Y7VM80	Inverted formin-2
Dnajb11	2.24426	27.7854	27.2196	25.3236	25.1928	24.8018	0	37.155	17	6	6	6	5	5	Q99KV1	Q99KV1	DnaJ homolog subfamily B member 11
Gnaq	2.24416	25.835	25.5713	23.4987	23.4192	22.7366	0	30.869	12	4	4	4	4	4	P21279;P21278;P30677	P21279	Guanine nucleotide-binding protein G(q) subunit alpha
Otub1	2.24397	27.0797	27.418	25.1098	24.9	24.6271	0	28.47	23	8	7	8	7	7	Q7TQI3;D3YWF6;D3Z7K0	Q7TQI3;D3YWF6;D3Z7K0	Ubiquitin thioesterase OTUB1
Rab11b;Rab11a	2.24392	29.8259	29.4661	27.4336	27.3705	27.0247	0	67.697	43	11	11	10	10	11	P46638;P62492;G3UY29;E9Q3P9;F8WGS1;G3UZD3;G3UZL4;E9Q6B3;Q9WTL2;D3YYB3	P46638;P62492;G3UY29;E9Q3P9;F8WGS1;G3UZD3	Ras-related protein Rab-11B;Ras-related protein Rab-11A
Ecm29	2.24361	22.0163	22.0865	19.8081	19.8075	16.7735	0	4.5653	2	2	2	2	2	2	Q6PDI5	Q6PDI5	Proteasome-associated protein ECM29 homolog
Rpia	2.24322	24.6185	24.4669	22.3881	22.2109	21.8212	0	4.3567	2	2	2	2	2	2	P47968	P47968	Ribose-5-phosphate isomerase
Bcat2	2.24275	27.8167	27.4988	25.4945	25.3355	24.62	0	29.2	17	8	8	8	6	8	O35855;O88374;A0A1B0GX27;A0A1B0GST1;A0A1B0GQY4	O35855;O88374;A0A1B0GX27	Branched-chain-amino-acid aminotransferase, mitochondrial;Branched-chain-amino-acid aminotransferase
Gmppa	2.24178	23.0752	22.9449	20.6784	20.8581	19.9665	0	3.7827	1	1	1	1	1	1	Q922H4	Q922H4	Mannose-1-phosphate guanyltransferase alpha
Aarsd1;Gm27029	2.24175	22.5237	21.9429	20.38	19.603	19.1507	0.0038952	2.0851	1	2	2	1	2	1	Q3THG9;A2A4P3;A2A4P4	Q3THG9;A2A4P3;A2A4P4	Alanyl-tRNA editing protein Aarsd1
Aco2	2.23996	30.522	30.3584	28.2528	28.1476	26.4713	0	143.86	104	30	28	29	24	25	Q99KI0;A0A2R8VJW0;A0A2R8W744;A0A2R8VHM8	Q99KI0	Aconitate hydratase, mitochondrial
Bcap29	2.23971	24.6109	24.1092	22.0573	22.1834	21.9548	0	3.7773	2	1	1	1	1	1	Q61334	Q61334	B-cell receptor-associated protein 29
Ptrh2	2.23951	25.1305	25.0074	22.7832	22.8756	23.1773	0	12.726	10	3	3	3	3	3	Q8R2Y8	Q8R2Y8	Peptidyl-tRNA hydrolase 2, mitochondrial
Atp8a1	2.23926	25.6343	24.6283	22.9178	22.8663	20.7249	0	7.1062	4	4	4	3	3	3	A0A0M3HEP7;P70704;A0A0J9YV34;Q3U9N5	A0A0M3HEP7;P70704;A0A0J9YV34	Phospholipid-transporting ATPase IA
Sucla2	2.23896	27.3844	27.309	25.0553	25.1602	23.8171	0	37.892	21	12	11	12	11	11	Q9Z2I9	Q9Z2I9	Succinyl-CoA ligase [ADP-forming] subunit beta, mitochondrial
Grcc10	2.23845	21.3988	21.1615	18.9903	19.0932	19.7543	0	3.6722	2	1	1	1	1	1	O35127	O35127	Protein C10
Npm1	2.23836	30.0757	29.9008	27.6802	27.8196	27.683	0	107.55	64	7	7	7	7	6	Q61937;Q5SQB0;Q9DAY9;Q5SQB5	Q61937;Q5SQB0;Q9DAY9;Q5SQB5	Nucleophosmin
Carkd	2.23828	24.803	24.3882	22.511	22.2037	21.7167	0	12.852	8	3	3	3	3	3	Q9CZ42;J3QN06;J3QMM7;K3W4M4;J3QPU6	Q9CZ42;J3QN06;J3QMM7;K3W4M4	ATP-dependent (S)-NAD(P)H-hydrate dehydratase
Eno1	2.23788	32.2123	32.307	30.0375	30.0061	29.0783	0	209.35	155	21	21	21	19	20	P17182;Q6PHC1;B0QZL1;B1ARR7;P17183;D3Z2S4;A0A0N4SUX5;A0A0N4SUI6;B1ARR6;D3YVD3;D3Z6E4;A0A0N4SUW8	P17182;Q6PHC1	Alpha-enolase
Fkbp15	2.23784	25.8707	25.6113	23.356	23.6504	21.2171	0	29.09	11	5	5	5	5	5	Q6P9Q6;A0A6I8MWZ0;Q80YW9;Q80YW6;Q80YW7	Q6P9Q6;A0A6I8MWZ0;Q80YW9	FK506-binding protein 15;Peptidyl-prolyl cis-trans isomerase
Sms	2.23771	21.2607	21.4103	19.0979	19.0977	18.2926	0	4.1633	3	1	1	1	1	1	P97355;E9PZ58	P97355;E9PZ58	Spermine synthase
Dync1h1	2.23751	29.7671	29.6712	27.6775	27.2858	22.9828	0	294.54	148	72	67	69	62	58	Q9JHU4;F6ZX84	Q9JHU4	Cytoplasmic dynein 1 heavy chain 1
Cstf2	2.23743	23.4324	23.6583	21.1216	21.4942	20.2437	0	3.9943	2	1	1	1	1	1	Q8BIQ5;A2AEJ8;A2AEK1	Q8BIQ5;A2AEJ8;A2AEK1	Cleavage stimulation factor subunit 2
Rab18	2.23707	26.0611	25.2695	23.639	23.2175	23.2894	0	28.078	14	6	6	5	6	4	P35293;A0A452J8C1;A0A3Q4EI12;A0A3Q4EIF7	P35293;A0A452J8C1;A0A3Q4EI12	Ras-related protein Rab-18
Trap1	2.23667	27.3577	26.4214	24.5397	24.766	22.8722	0	26.844	15	10	9	7	6	7	Q9CQN1	Q9CQN1	Heat shock protein 75 kDa, mitochondrial
Pebp1	2.23608	29.5174	29.5785	27.5356	27.0881	27.507	0	87.302	34	10	9	10	10	10	P70296;D3Z1V4;D6RHS6	P70296;D3Z1V4	Phosphatidylethanolamine-binding protein 1;Hippocampal cholinergic neurostimulating peptide
Pds5b	2.23585	25.4866	25.3196	23.1957	23.1388	20.4735	0	8.6983	9	5	5	5	5	5	Q4VA53;F8WHU5	Q4VA53;F8WHU5	Sister chromatid cohesion protein PDS5 homolog B
Idh2	2.2345	29.6202	29.1585	27.3517	26.9579	26.0998	0	88.106	56	17	17	15	15	13	P54071;D6RIL6;A0A0U1RP68;A0A0U1RPR1	P54071;D6RIL6	Isocitrate dehydrogenase [NADP], mitochondrial
Plp2	2.23408	25.442	25.8656	23.4194	23.42	24.6227	0	8.3736	4	1	1	1	1	1	Q9R1Q7	Q9R1Q7	Proteolipid protein 2
Slc40a1	2.23392	26.827	25.9668	24.1759	24.15	23.8204	0	8.0735	6	3	3	2	2	3	Q9JHI9	Q9JHI9	Solute carrier family 40 member 1
Ap1m1	2.23258	25.5041	24.956	22.8912	23.1037	21.8865	0	9.3285	7	4	4	3	2	3	P35585;Q9WVP1;A0A1D5RLL9;A0A1D5RMJ1;A0A1D5RLW6;D3YZ71;A0A1L1SUA0;A0A0R4IZX6;A0A0R4J1L4	P35585	AP-1 complex subunit mu-1
Npepps	2.23242	25.3323	25.6325	23.4347	23.0654	21.1843	0	23.619	13	7	6	7	5	5	Q11011;E9Q039;F6QYF8;E9Q6F4;F6V7K3	Q11011;E9Q039;F6QYF8;E9Q6F4	Puromycin-sensitive aminopeptidase
Lmnb2	2.23219	25.8617	26.0951	23.2893	24.2032	22.0639	0	24.542	14	9	8	7	4	7	P21619;A0A0R4J0Q5	P21619;A0A0R4J0Q5	Lamin-B2
Glyr1	2.23217	26.759	26.2214	24.3815	24.1345	22.9827	0	27.465	16	7	6	7	5	5	D3YYT1;Q922P9	D3YYT1;Q922P9	Putative oxidoreductase GLYR1
Atp6v0c	2.23177	26.2357	25.8124	24.8569	22.7277	25.8001	0	4.4711	10	1	1	1	1	1	E9Q9C5;P63082	E9Q9C5;P63082	V-type proton ATPase 16 kDa proteolipid subunit
Rbm8a	2.23161	27.499	27.5461	25.4502	25.1317	25.8027	0	39.477	16	7	7	7	6	6	Q9CWZ3;A0A0G2JEA9;A0A0G2JFX7;A0A0N4SUH6	Q9CWZ3;A0A0G2JEA9;A0A0G2JFX7;A0A0N4SUH6	RNA-binding protein 8A
Ilf3	2.23143	26.5523	26.2641	23.9778	24.3757	22.4856	0	20.331	13	6	6	6	4	6	Q9Z1X4;Q45VK5;A0A1L1STE4;A0A1L1SQR7;Q91WM1	Q9Z1X4;Q45VK5;A0A1L1STE4	Interleukin enhancer-binding factor 3
Tubb2a	2.23101	28.4428	27.9872	26.0861	25.8819	25.1871	0	85.759	22	7	7	6	6	6	Q7TMM9	Q7TMM9	Tubulin beta-2A chain
Hspa9	2.23071	30.4938	30.138	28.0587	28.1117	26.3557	0	162.13	97	24	24	24	24	24	P38647	P38647	Stress-70 protein, mitochondrial
Gpx1	2.23058	30.0665	29.9828	27.8016	27.7866	27.4964	0	80.267	65	14	14	14	12	13	P11352;A0A0A6YVV2;A0A0A6YY34	P11352;A0A0A6YVV2;A0A0A6YY34	Glutathione peroxidase 1;Glutathione peroxidase
Icam1	2.2304	26.619	26.325	24.43	24.0532	23.0041	0	48.564	20	8	7	8	8	8	P13597	P13597	Intercellular adhesion molecule 1
	2.22941	22.6347	22.6682	20.3216	20.5225	21.931	0.0032432	2.2666	0	1	1	1	1	1	Q9CRC3	Q9CRC3	UPF0235 protein C15orf40 homolog
Tmem30a	2.2282	24.7075	24.2819	22.0191	22.5138	21.7903	0	4.7668	4	1	1	1	1	1	Q8VEK0;D3YVV1	Q8VEK0;D3YVV1	Cell cycle control protein 50A
Rps20	2.22812	30.1532	29.9173	27.9499	27.6643	28.9976	0	14.513	21	4	4	4	4	4	P60867	P60867	40S ribosomal protein S20
Gatm	2.2281	25.2993	24.5616	23.4614	21.9433	21.5822	0	28.134	14	4	4	4	4	3	Q9D964	Q9D964	Glycine amidinotransferase, mitochondrial
Cnp	2.22692	28.3795	27.9904	26.0196	25.8965	24.7204	0	51.848	31	12	12	11	12	11	P16330	P16330	2,3-cyclic-nucleotide 3-phosphodiesterase
Luc7l	2.22682	25.3189	24.4772	22.7179	22.6245	22.0576	0	4.9425	3	2	2	2	2	2	Q9CYI4;A0A0R4J047;D3Z765;F6QU81	Q9CYI4;A0A0R4J047;D3Z765	Putative RNA-binding protein Luc7-like 1
Snrpa	2.22637	28.028	26.9943	25.0334	25.5361	25.2844	0	17.415	15	6	5	5	5	6	Q62189;D3Z0S6;Q9CQI7;D6RI83;A2CES4	Q62189;D3Z0S6	U1 small nuclear ribonucleoprotein A
Rpl23a	2.22561	29.1244	29.0615	27.0594	26.6753	27.7901	0	20.871	26	8	7	7	8	7	P62751	P62751	60S ribosomal protein L23a
Decr1	2.22512	27.0779	26.5482	24.6087	24.5671	23.8647	0	24.041	16	5	5	5	5	5	Q9CQ62	Q9CQ62	2,4-dienoyl-CoA reductase, mitochondrial
Nampt	2.22361	27.1797	27.0934	25.0066	24.8192	23.5595	0	46.031	29	11	11	11	10	10	Q99KQ4	Q99KQ4	Nicotinamide phosphoribosyltransferase
Gls	2.22345	27.1145	26.7487	24.8074	24.6088	23.0923	0	44.043	17	9	8	9	7	6	D3Z7P3;D3Z7P4;F6U529	D3Z7P3;D3Z7P4	Glutaminase kidney isoform, mitochondrial
Got1	2.22324	25.9475	25.9364	23.5072	23.9302	22.6397	0	29.665	16	5	5	5	5	5	P05201;F7ALS6	P05201;F7ALS6	Aspartate aminotransferase, cytoplasmic
Fcn1	2.22275	23.7323	23.5546	21.4164	21.4251	20.7558	0	6.5828	1	2	2	2	1	1	O70165	O70165	Ficolin-1
Ccdc51	2.22193	23.0532	22.723	20.6244	20.7078	19.7167	0	6.7293	4	1	1	1	1	1	Q3URS9	Q3URS9	Coiled-coil domain-containing protein 51
Mapk3	2.22148	25.5169	25.8733	23.5659	23.3813	22.5255	0	5.9138	6	3	3	3	3	3	Q63844;D3Z3G6;D3Z6D8;A0A0U1RPZ0;A0A0U1RPX4	Q63844;D3Z3G6;D3Z6D8;A0A0U1RPZ0;A0A0U1RPX4	Mitogen-activated protein kinase 3;Mitogen-activated protein kinase
Ccar1	2.22082	25.0858	25.408	22.8693	23.1829	21.0768	0	12.363	6	4	4	4	3	3	Q8CH18	Q8CH18	Cell division cycle and apoptosis regulator protein 1
Gdi2	2.2197	30.7164	30.6169	28.5087	28.3853	27.1408	0	170.48	108	30	29	28	28	27	Q61598;A0A1Y7VL99;A0A1Y7VLG4	Q61598;A0A1Y7VL99	Rab GDP dissociation inhibitor beta
Anpep	2.21895	27.2363	26.7839	25.0264	24.5559	22.6649	0	33.471	13	12	10	10	10	7	P97449;A0A0U1RNS3	P97449	Aminopeptidase N
Abi3	2.21846	24.1935	23.7583	21.894	21.6208	21.2713	0	8.6737	8	1	1	1	1	1	Q8BYZ1	Q8BYZ1	ABI gene family member 3
Tufm	2.21837	29.9134	29.4742	27.4644	27.4865	26.0815	0	105.35	66	22	22	21	19	20	Q8BFR5;A0A0U1RNQ6;A0A0U1RPC4	Q8BFR5	Elongation factor Tu, mitochondrial
Myl12a	2.21721	28.0652	27.5504	25.6909	25.4903	25.9383	0	32.271	13	2	2	2	2	2	Q6ZWQ9;D3YV37	Q6ZWQ9;D3YV37
Rufy1	2.21618	24.1844	24.038	21.6079	22.1821	20.1136	0.0038678	1.9925	1	2	2	2	2	2	Q8BIJ7	Q8BIJ7	RUN and FYVE domain-containing protein 1
Hadha	2.21447	30.1861	29.8008	27.8782	27.6798	26.0382	0	158.24	94	27	27	26	26	26	Q8BMS1	Q8BMS1	Trifunctional enzyme subunit alpha, mitochondrial;Long-chain enoyl-CoA hydratase;Long chain 3-hydroxyacyl-CoA dehydrogenase
Lgalsl	2.21419	25.6122	24.8187	23.0824	22.9202	23.372	0	17.153	11	5	4	4	3	4	Q8VED9;E9QAC6	Q8VED9	Galectin-related protein
Dpm1	2.21409	24.1676	23.8528	21.7606	21.8316	21.2115	0	6.1174	6	2	2	2	2	2	O70152;A2BDX2	O70152;A2BDX2	Dolichol-phosphate mannosyltransferase subunit 1
Eif3g	2.21381	26.452	26.4415	24.2914	24.1746	23.4807	0	16.884	13	4	4	4	4	4	Q9Z1D1	Q9Z1D1	Eukaryotic translation initiation factor 3 subunit G
Snrpc	2.21371	26.8646	26.6373	24.7138	24.3606	25.4532	0	10.767	8	2	2	2	2	2	Q62241;A0A3B2W450;A0A3B2WCR6	Q62241;A0A3B2W450;A0A3B2WCR6	U1 small nuclear ribonucleoprotein C
Ube2k	2.21349	26.203	26.1665	23.9862	23.9563	23.8816	0	12.293	11	3	3	3	3	3	P61087;A0A0J9YUI1;D3Z4U3;F8WIC2;A0A0J9YU07	P61087;A0A0J9YUI1;D3Z4U3;F8WIC2	Ubiquitin-conjugating enzyme E2 K
Ap1b1	2.21313	26.7548	26.7221	24.6816	24.369	22.5299	0	21.818	11	6	6	6	6	6	O35643;Q5SVG5;Q5SVG4;Q5SWR0	O35643;Q5SVG5;Q5SVG4	AP-1 complex subunit beta-1
Rhog	2.21252	29.8779	29.8482	27.7022	27.5988	27.6857	0	101.21	38	10	10	10	10	10	P84096;A0A1B0GSL4	P84096	Rho-related GTP-binding protein RhoG
Ubtf	2.21248	28.9551	28.2624	26.4173	26.3751	24.9246	0	66.261	43	17	16	15	15	17	A2AWT6;A2AWT7;A2AWT5;P25976;E9Q4A8;G3UZW9	A2AWT6;A2AWT7;A2AWT5;P25976	Nucleolar transcription factor 1
Erp44	2.21156	27.4934	27.174	25.1431	25.1011	24.375	0	34.393	24	8	8	8	6	6	Q9D1Q6	Q9D1Q6	Endoplasmic reticulum resident protein 44
Sec62	2.21146	25.0692	23.825	22.5741	21.8972	21.7561	0	4.9838	4	3	3	3	2	1	Q8BU14	Q8BU14	Translocation protein SEC62
Myh9	2.21124	34.8946	34.6029	32.5713	32.5037	29.3365	0	323.31	795	128	126	127	119	123	Q8VDD5;F2Z494;A0A2R8VKI5;A0A2R8W6V7;Q8BXF2;Q02566;Q5SX39;Q5SX40;Q91Z83;G3UW82;P13542;P13541;B1AR69;A2AQP0;E9Q264	Q8VDD5	Myosin-9
Aldoa;Aldoart1	2.21102	31.9374	31.9	29.7712	29.6442	28.6776	0	196.49	139	21	20	21	20	21	P05064;A6ZI44;D3YWI1;Q9CPQ9;D3Z510;A0A0U1RPN8;A6ZI46;D3YV98;A0A0U1RPT5;A6ZI47;P05063;Q91Y97	P05064;A6ZI44;D3YWI1;Q9CPQ9;D3Z510;A0A0U1RPN8;A6ZI46	Fructose-bisphosphate aldolase A;Fructose-bisphosphate aldolase
Ppp1r12a	2.21016	26.3475	26.0777	24.0347	23.9702	21.8854	0	25.236	7	8	8	8	7	7	Q9DBR7;A0A1W2P750;Q8BG95;A0A571BGD8;A6H644	Q9DBR7;A0A1W2P750	Protein phosphatase 1 regulatory subunit 12A
Pcbp1	2.20952	30.2868	30.1914	28.0757	27.9835	27.4348	0	166.95	66	17	17	17	17	16	P60335;P57724;A0A087WR61;A0A087WSI1;A0A1L1SUS5;A0A1L1SRP9;A0A1L1SQ99;A0A087WRH3;A0A0R4J044	P60335	Poly(rC)-binding protein 1
Ddb1	2.20934	25.1878	25.115	22.7996	23.0845	20.654	0	12.003	9	5	5	5	5	5	Q3U1J4;A0A494B987;A0A494BBJ6;A0A494BAF6	Q3U1J4;A0A494B987	DNA damage-binding protein 1
G6b	2.20903	27.0468	26.5604	24.8038	24.3853	24.1986	0	23.665	11	5	5	5	4	5	D7PDD4;D3YVS6	D7PDD4;D3YVS6
Grpel1	2.20901	27.4562	26.8689	24.9809	24.9262	24.6622	0	16.804	14	7	6	5	6	5	Q99LP6	Q99LP6	GrpE protein homolog 1, mitochondrial
Uap1l1	2.2086	26.5694	26.4502	24.4516	24.1508	22.9874	0	25.819	19	8	8	8	7	5	Q3TW96;Q91YN5;A0A0R4J1F6;A0A0R4J085;Q3UHZ7	Q3TW96	UDP-N-acetylhexosamine pyrophosphorylase-like protein 1
Uso1	2.20823	26.9191	26.8278	24.7505	24.58	22.6977	0	29.828	14	9	8	9	8	8	Q9Z1Z0;A0A0J9YUG0	Q9Z1Z0	General vesicular transport factor p115
Cct8	2.20821	29.1213	29.0813	26.9604	26.8258	25.2144	0	91.977	50	20	20	19	19	19	P42932;H3BL49;H3BJB6;H3BLL1;H3BKG2;H3BKR8	P42932;H3BL49;H3BJB6	T-complex protein 1 subunit theta
Acsf2	2.20801	28.4612	28.1382	26.2366	25.9468	24.8906	0	96.311	41	16	16	16	16	15	Q8VCW8	Q8VCW8	Acyl-CoA synthetase family member 2, mitochondrial
Srp72	2.20707	25.8356	25.7779	23.4985	23.7008	22.046	0	33.041	13	7	7	6	5	6	F8VQC1;E9Q740	F8VQC1;E9Q740	Signal recognition particle subunit SRP72
Mcm6	2.20646	24.1671	24.3738	21.8244	22.3036	19.9452	0	8.5191	4	2	2	2	2	2	P97311;Q3ULG5	P97311;Q3ULG5	DNA replication licensing factor MCM6;DNA helicase
Sec13	2.20608	26.2083	26.1814	23.6773	24.3002	23.7835	0	33.533	8	4	3	4	3	4	Q9D1M0	Q9D1M0	Protein SEC13 homolog
Ddx39a	2.20604	25.7555	25.3481	23.3817	23.3098	22.5987	0	10.619	9	4	4	4	4	3	Q8VDW0;D6RHT5	Q8VDW0	ATP-dependent RNA helicase DDX39A
Srgap2;Srgap1	2.20549	20.3986	21.0418	17.9658	19.0637	16.2126	0	3.222	2	1	1	1	1	0	Q91Z67;Q91Z69;A0A087WNR5;A0A087WRV4;A0A087WNM1;D3YZW1	Q91Z67;Q91Z69;A0A087WNR5;A0A087WRV4;A0A087WNM1;D3YZW1	SLIT-ROBO Rho GTPase-activating protein 2;SLIT-ROBO Rho GTPase-activating protein 1
Prkar1a	2.20436	27.3103	27.1223	24.9356	25.0882	24.2545	0	51.228	32	10	10	9	8	9	Q9DBC7;A2AI69;P12849;D3Z4L4;D3YTM5;D3Z068;D3Z0V6	Q9DBC7	cAMP-dependent protein kinase type I-alpha regulatory subunit;cAMP-dependent protein kinase type I-alpha regulatory subunit, N-terminally processed
Atp6v0d1	2.20304	29.6934	28.8491	27.2144	26.9221	26.6063	0	56.253	28	9	9	9	8	9	P51863	P51863	V-type proton ATPase subunit d 1
Ifi30	2.20267	30.0487	29.3272	27.7058	27.2647	27.3109	0	66.425	59	8	8	8	8	8	Q9ESY9	Q9ESY9	Gamma-interferon-inducible lysosomal thiol reductase
Actr1a	2.20249	26.9235	26.7286	24.7933	24.4539	23.7922	0	30.347	12	3	3	3	3	3	P61164;A0A494BB86;A0A494BAH0	P61164;A0A494BB86	Alpha-centractin
Pfdn6	2.20218	24.5438	24.6662	22.4421	22.3635	22.8899	0	4.7461	2	2	2	2	2	2	Q03958;G3UYF9;A0A3Q4EBT3	Q03958;G3UYF9;A0A3Q4EBT3	Prefoldin subunit 6
Tial1;Tia1	2.20206	23.7084	23.4074	21.6956	21.0161	20.7677	0	5.6594	2	2	2	2	2	1	P70318;Q8CII5;D3Z3Y4;Q921W2;G5E8L2;Q80ZW7;P52912;A0A0N4SW78;A0A0U1RPE1;A0A0N4SUX1;D6RGU1;A0A0U1RPB0;A0A0U1RPD3;D3Z4H6	P70318;Q8CII5;D3Z3Y4;Q921W2;G5E8L2;Q80ZW7;P52912;A0A0N4SW78;A0A0U1RPE1;A0A0N4SUX1;D6RGU1;A0A0U1RPB0;A0A0U1RPD3;D3Z4H6	Nucleolysin TIAR;Nucleolysin TIA-1
Pa2g4	2.20165	29.1454	28.6799	26.6898	26.7322	25.7524	0	100.29	43	14	13	12	11	11	P50580	P50580	Proliferation-associated protein 2G4
Cd48	2.20163	26.6202	26.2309	24.2912	24.1565	23.9131	0	23.34	11	5	5	5	5	5	P18181;F8WHM0	P18181	CD48 antigen
Por	2.2014	27.0514	26.4983	24.5348	24.6122	22.9512	0	41.929	23	9	9	8	8	8	P37040;Q05DV1;E9PVT9;E9Q997	P37040;Q05DV1	NADPH--cytochrome P450 reductase
Hprt1	2.20126	27.5447	27.8316	25.3826	25.5912	25.2781	0	51.096	28	9	8	9	8	8	P00493	P00493	Hypoxanthine-guanine phosphoribosyltransferase
Cst3	2.2012	26.4322	26.506	25.0596	23.4762	24.7926	0	5.3693	4	3	2	3	3	2	P21460;A2APX3	P21460;A2APX3	Cystatin-C
Dhx29	2.20038	21.0421	20.8487	19.6047	17.8854	15.7989	0.0032293	2.2204	1	2	1	1	0	1	Q6PGC1	Q6PGC1	ATP-dependent RNA helicase Dhx29
H2afy	2.20001	30.3397	30.5434	28.1225	28.3606	27.5595	0	164.35	77	15	15	15	15	15	Q9QZQ8;Q8CCK0	Q9QZQ8	Core histone macro-H2A.1
Hars	2.19934	26.992	26.8033	24.8112	24.5855	23.3272	0	25.725	20	8	8	8	7	7	Q61035;A0A494BAV2;A0A494B9A1	Q61035	Histidine--tRNA ligase, cytoplasmic
Gtpbp4	2.19931	26.2643	25.2962	23.6867	23.4752	22.0434	0	15.615	9	6	5	5	5	5	Q99ME9;A0A217FL53	Q99ME9	Nucleolar GTP-binding protein 1
Itsn2	2.19875	20.9628	21.3106	19.1321	18.7438	16.11	0	4.3637	2	1	1	1	1	1	Q9Z0R6;E9QNG1;B2RR82	Q9Z0R6;E9QNG1;B2RR82	Intersectin-2
Crot	2.19865	21.6752	21.3095	19.1808	19.4065	17.7425	0	2.9794	2	1	1	1	1	1	Q9DC50	Q9DC50	Peroxisomal carnitine O-octanoyltransferase
Rpl8	2.1982	29.9342	29.6667	27.629	27.5755	27.7681	0	62.323	36	8	7	7	8	7	P62918	P62918	60S ribosomal protein L8
Uqcrc1	2.19734	30.0866	29.4468	27.6521	27.4866	26.6883	0	124.04	54	14	14	14	14	14	Q9CZ13;A0A0A6YW82;A0A0A6YWX6;A0A0A6YVZ0	Q9CZ13	Cytochrome b-c1 complex subunit 1, mitochondrial
Fubp1	2.19696	26.7149	27.1596	24.4942	24.9864	23.2855	0	34.183	18	8	7	8	6	7	Q91WJ8;Q3TUE1;A0A0G2JGW9;A0A0G2JFY5;Q3UUU2;A0A0G2JG00;A0A0G2JFK2;A0A0G2JGV9;A0A0G2JG96	Q91WJ8;Q3TUE1;A0A0G2JGW9;A0A0G2JFY5;Q3UUU2;A0A0G2JG00;A0A0G2JFK2	Far upstream element-binding protein 1
Ywhah	2.19696	30.617	30.3871	28.3883	28.222	27.7909	0	82.452	63	13	13	13	12	13	P68510	P68510	14-3-3 protein eta
Psmc3	2.19693	27.5856	27.5485	25.3662	25.374	24.0968	0	46.827	26	13	13	13	12	12	O88685;A2AGN7;B7ZCF1	O88685;A2AGN7;B7ZCF1	26S protease regulatory subunit 6A
Galk1	2.19653	25.9377	25.8576	23.5303	23.8719	23.1846	0	11.512	9	4	3	3	3	4	Q9R0N0	Q9R0N0	Galactokinase
Slc25a11	2.19638	26.77	26.66	24.5757	24.4616	23.9133	0	34.947	13	7	7	7	6	6	Q9CR62;Q5SX46;Q5SX48	Q9CR62;Q5SX46	Mitochondrial 2-oxoglutarate/malate carrier protein
S100a4	2.19626	29.29	28.8502	27.1762	26.5714	28.0523	0	12.887	17	4	4	4	4	4	P07091;A0A0G2JGD2	P07091;A0A0G2JGD2	Protein S100-A4
Xrn2	2.19587	26.5309	26.0028	24.079	24.063	22.0479	0	22.638	18	8	8	8	8	7	Q9DBR1	Q9DBR1	5-3 exoribonuclease 2
Cox5a	2.19567	29.7014	29.36	27.3689	27.3012	27.3644	0	28.427	29	7	7	7	7	7	P12787	P12787	Cytochrome c oxidase subunit 5A, mitochondrial
Cmpk1	2.19531	28.6831	28.6004	26.4478	26.4451	26.4677	0	30.604	37	9	9	9	9	9	Q9DBP5;A0A0R4J093	Q9DBP5;A0A0R4J093	UMP-CMP kinase
Cbx3	2.19492	29.0139	29.1663	26.7959	26.9944	27.57	0	50.937	30	6	6	6	6	6	P23198;Q9DCC5;D3Z1A9;D3Z313	P23198;Q9DCC5	Chromobox protein homolog 3
Ppox	2.19491	23.7984	23.7308	21.8236	21.3157	20.2991	0	9.3155	4	1	1	1	1	1	P51175;A0A0A6YX50	P51175;A0A0A6YX50	Protoporphyrinogen oxidase
Aqp1	2.19453	25.4149	24.9518	22.9724	23.0053	23.8987	0	37.471	7	2	2	2	2	2	Q02013	Q02013	Aquaporin-1
Pno1	2.19419	22.4004	21.8533	19.6941	20.1712	19.8517	0.0028944	2.2983	1	2	2	2	2	2	Q9CPS7	Q9CPS7	RNA-binding protein PNO1
Serpina10	2.1933	22.5555	21.4391	20.6865	18.9215	18.5177	0.00073855	2.5007	1	1	1	1	0	0	Q8R121	Q8R121	Protein Z-dependent protease inhibitor
Slk	2.19327	25.6407	25.21	23.4948	22.9693	20.8454	0	9.6897	8	6	6	5	6	5	O54988;A0A5F8MPV2	O54988	STE20-like serine/threonine-protein kinase
Elmo1	2.19297	28.5345	28.5901	26.3448	26.3938	24.5625	0	54.002	50	15	13	15	12	13	Q8BPU7;A2A5A7;D6RHT3;Q5GMG0;A0A1Y7VIX9	Q8BPU7	Engulfment and cell motility protein 1
Sirpa	2.19281	26.4615	26.3893	24.7376	23.7275	23.0832	0	23.78	15	6	6	5	4	3	P97797;A2ANC1	P97797	Tyrosine-protein phosphatase non-receptor type substrate 1
2001-09-01	2.19211	27.4611	27.5077	25.377	25.2076	24.3111	0	29.51	21	9	9	9	9	9	P42209;A0A0U1RQA1;D3Z3V3;D3YVG1;A0A0U1RPA8	P42209;A0A0U1RQA1;D3Z3V3;D3YVG1;A0A0U1RPA8	Septin-1
Gfm1	2.19186	22.4395	21.8937	19.8565	20.093	18.1165	0.0031994	2.1355	1	1	1	1	1	1	Q8K0D5	Q8K0D5	Elongation factor G, mitochondrial
Coro1c	2.19173	28.3055	28.0186	26.1834	25.7573	25.2084	0	44.577	32	9	9	9	9	9	Q9WUM4;E9PX03;E9PZJ0;E9PVJ1	Q9WUM4	Coronin-1C
Hist1h3a	2.19153	33.8638	34.0722	32.153	31.4	33.2656	0	51.364	58	6	6	6	6	6	P68433	P68433	Histone H3.1
Faf2	2.19145	25.4702	24.4354	22.5782	22.9445	21.8559	0	20.185	7	4	4	2	3	4	Q3TDN2;D3YUP4;D3Z2H4;D3Z4G9	Q3TDN2;D3YUP4;D3Z2H4	FAS-associated factor 2
Skp1	2.19131	27.4936	27.1909	25.2103	25.0916	25.3127	0	21.799	20	6	6	6	6	6	Q9WTX5;E9PUV4	Q9WTX5	S-phase kinase-associated protein 1
Srprb	2.19124	23.7975	23.7173	21.5942	21.5381	21.0436	0	7.6355	2	1	1	1	1	1	P47758	P47758	Signal recognition particle receptor subunit beta
Myl9	2.19101	29.1278	28.3706	26.6709	26.4455	26.9062	0	15.352	18	3	3	3	3	3	Q9CQ19	Q9CQ19	Myosin regulatory light polypeptide 9
Arcn1	2.19071	27.0206	26.9665	24.8788	24.7269	23.525	0	37.743	30	14	14	14	11	10	Q5XJY5	Q5XJY5	Coatomer subunit delta
Atp6v1d	2.18993	27.7619	26.7329	25.0071	25.1078	24.9071	0	46.774	22	6	6	6	6	6	P57746	P57746	V-type proton ATPase subunit D
Surf6	2.18993	26.2484	25.775	24.0007	23.6428	23.0675	0	11.181	12	5	5	5	4	4	P70279;A2ALA0	P70279;A2ALA0	Surfeit locus protein 6
M6pr	2.18857	28.4554	27.8855	26.031	25.9329	25.5729	0	39.412	23	5	5	5	4	4	P24668	P24668	Cation-dependent mannose-6-phosphate receptor
Ppbp	2.18809	31.8648	31.4114	29.5639	29.3361	30.3548	0	56.79	37	6	6	6	6	6	Q9EQI5	Q9EQI5
Slc39a11	2.18742	21.3105	21.5852	19.1992	19.3216	19.5698	0	4.1886	1	1	1	1	1	1	Q8BWY7;B1ARC5;B1ARC2	Q8BWY7;B1ARC5;B1ARC2	Zinc transporter ZIP11
Rps28	2.18731	28.1519	28.0156	25.7192	26.0736	27.7884	0	7.1379	10	2	2	2	2	2	P62858;G3UYV7	P62858;G3UYV7	40S ribosomal protein S28
Myo9b	2.18649	24.6944	23.6459	22.2778	21.6896	18.7314	0	20.599	8	4	4	2	3	3	E9PZW8;E9QKV6;A0A1D5RLD1;E9PWZ6;Q9QY06;A0A1D5RLW4	E9PZW8;E9QKV6;A0A1D5RLD1;E9PWZ6;Q9QY06;A0A1D5RLW4	Unconventional myosin-IXb
Rpl15	2.18648	28.6099	28.4079	26.3174	26.3274	26.3389	0	19.687	26	6	6	6	6	6	Q9CZM2;B8JKK2	Q9CZM2;B8JKK2	60S ribosomal protein L15;Ribosomal protein L15
Rasa4	2.1858	23.0665	22.1866	20.301	20.5806	18.2683	0.003876	2.0081	2	2	1	2	1	1	Q6PFQ7	Q6PFQ7	Ras GTPase-activating protein 4
Tfg	2.18558	25.3129	24.9318	23.0641	22.8094	22.613	0	9.089	6	3	3	3	3	2	Q9Z1A1;B8JJG9;B8JJG7;B8JJG8;F6QJV5	Q9Z1A1;B8JJG9;B8JJG7;B8JJG8
Suclg2	2.18525	27.8559	27.3241	25.4585	25.351	24.0896	0	69.791	26	10	10	9	8	8	Q9Z2I8;A0A0N4SWD1	Q9Z2I8	Succinyl-CoA ligase [GDP-forming] subunit beta, mitochondrial
Eif5b	2.18505	27.8696	26.835	25.2768	25.0576	23.0999	0	61.017	31	14	13	13	10	10	Q05D44	Q05D44	Eukaryotic translation initiation factor 5B
Pf4	2.18466	32.1946	31.2859	29.8032	29.308	31.0887	0	14.555	40	4	4	4	4	3	Q9Z126;A0A0J9YTR7	Q9Z126;A0A0J9YTR7	Platelet factor 4
Eno3	2.1843	27.1387	26.6053	24.9041	24.4712	23.8599	0	41.881	22	6	6	6	6	5	P21550;Q5SX59;Q5SX60;J3QPZ9;Q5SX61	P21550;Q5SX59	Beta-enolase;Enolase
Gatad2a	2.18429	22.2193	21.6905	19.7978	19.7434	18.0522	0	4.955	1	2	1	2	1	1	Q8CHY6;A0A1I7Q4G8;E9QMN5	Q8CHY6;A0A1I7Q4G8;E9QMN5	Transcriptional repressor p66 alpha
Rpl5	2.18374	28.4283	28.3026	26.2776	26.0858	26.1947	0	29.176	29	7	6	6	7	7	P47962;D3YYV8	P47962;D3YYV8	60S ribosomal protein L5
Ighg2b;Ighg;Igh-1a;Igh-3	2.1835	24.7911	23.4936	21.8504	22.0674	21.9619	0.00037879	2.7947	4	1	1	1	1	1	A0A075B5P3;A0A0A6YVP0;P01863;P01865;P01867	A0A075B5P3;A0A0A6YVP0;P01863;P01865;P01867	Ig gamma-2A chain C region, A allele;Ig gamma-2A chain C region, membrane-bound form;Ig gamma-2B chain C region
Nup93	2.18311	23.3731	23.5811	21.3835	21.2044	19.0953	0	5.1109	2	1	1	1	1	1	Q8BJ71	Q8BJ71	Nuclear pore complex protein Nup93
Fgr	2.18309	25.752	25.8088	23.5641	23.6306	22.1609	0	16.7	14	5	5	5	5	4	P14234	P14234	Tyrosine-protein kinase Fgr
Sgpl1	2.18265	25.2243	24.6681	22.9555	22.5716	21.3996	0	8.2073	5	2	2	2	2	2	Q8R0X7;D3YZT4;D6REF7;D3YY13;D3Z1Z3	Q8R0X7;D3YZT4;D6REF7;D3YY13;D3Z1Z3	Sphingosine-1-phosphate lyase 1
Hacd3	2.1821	23.2852	23.2996	20.8094	21.4112	20.6785	0	4.1607	3	1	1	1	1	1	Q8K2C9	Q8K2C9	Very-long-chain (3R)-3-hydroxyacyl-CoA dehydratase 3
Rpsa	2.18178	29.7038	29.6005	27.5447	27.396	27.2402	0	89.933	38	11	11	11	11	11	P14206;A0A1L1SUK3;A0A1L1SRW0	P14206;A0A1L1SUK3	40S ribosomal protein SA
Txnl1	2.18147	27.409	27.5129	25.1464	25.4125	24.8434	0	30.848	16	7	7	7	6	7	Q8CDN6;A0A498WGD8;A0A494BBI1;A0A494B955;A0A494BB31	Q8CDN6;A0A498WGD8;A0A494BBI1;A0A494B955	Thioredoxin-like protein 1
Rsu1	2.18095	28.8974	28.4361	26.6587	26.3129	26.1638	0	75.488	54	9	9	9	9	9	Q01730;Q9D031;A2AUR7;B1AYQ0;E0CXG5;A0A0A6YWZ2	Q01730;Q9D031;A2AUR7	Ras suppressor protein 1
Top2b	2.18072	28.6259	28.2434	26.296	26.2119	23.2897	0	83.671	56	27	26	25	23	21	Q64511;F6U5K2;F6XX57	Q64511	DNA topoisomerase 2-beta
Mmrn1	2.18023	29.2907	28.7472	26.9188	26.7588	24.2618	0	110.57	82	25	25	24	22	21	B2RPV6;A0A0N4SVL8;G3UVV6	B2RPV6;A0A0N4SVL8;G3UVV6	Multimerin-1
Lsm8	2.17903	25.3762	24.9743	23.0191	22.9734	23.6672	0	9.311	9	4	4	3	3	3	Q6ZWM4;A0A0N4SUZ3	Q6ZWM4;A0A0N4SUZ3	U6 snRNA-associated Sm-like protein LSm8
Anxa3	2.1784	28.3711	28.4087	26.2586	26.1644	25.2858	0	68.686	44	15	15	15	14	13	O35639;Q3TET3;A0A0G2JDV9;A0A0G2JGL7	O35639	Annexin A3
Pmm2	2.17747	26.1741	26.4031	24.0842	24.1381	23.5805	0	10.764	9	4	4	4	4	4	Q9Z2M7	Q9Z2M7	Phosphomannomutase 2
Stk24	2.17738	26.9354	27.3083	25.0194	24.8696	24.0983	0	33.293	22	9	8	9	9	9	Q99KH8	Q99KH8	Serine/threonine-protein kinase 24;Serine/threonine-protein kinase 24 35 kDa subunit;Serine/threonine-protein kinase 24 12 kDa subunit
H1f0	2.17674	28.1501	28.0273	25.7109	26.1129	27.0586	0	11.9	20	4	4	4	4	4	P10922	P10922	Histone H1.0;Histone H1.0, N-terminally processed
Synj1	2.17617	24.2468	24.2138	22.2255	21.8827	19.0943	0	9.8654	3	2	2	2	2	2	Q8CHC4;D3Z656;F6XIX0;F7CD11;A0A338P6C7;E9Q7S0;F7BQW7;F6VSS8	Q8CHC4;D3Z656;F6XIX0;F7CD11;A0A338P6C7;E9Q7S0;F7BQW7;F6VSS8	Synaptojanin-1
Lgals3bp	2.17532	24.7074	23.8526	22.4575	21.7519	23.3055	0.00074239	2.5369	3	1	1	1	1	1	F6VRP8	F6VRP8
Cops7b	2.17518	21.288	21.2701	19.012	19.1957	19.1087	0.00074322	2.5465	2	1	1	1	1	1	Q8BV13;D6RH36;D6RI85	Q8BV13;D6RH36;D6RI85	COP9 signalosome complex subunit 7b
Ywhae	2.17484	31.9685	31.7773	29.743	29.6531	29.0768	0	122.61	124	21	21	21	19	20	P62259;F6WA09;D6REF3	P62259;F6WA09	14-3-3 protein epsilon
Ca2	2.17478	28.7593	28.2444	26.4661	26.188	26.11	0	34.93	29	7	6	7	7	7	P00920;A0A0A6YX78	P00920	Carbonic anhydrase 2
2002-09-01	2.17458	28.1723	28.0506	26.0037	25.87	25.0091	0	72.297	37	12	12	12	10	11	P42208;E9Q3V6;F6WYM0;D3YYB1;D3Z3C0;D3Z1S1;F6UKN5;D3YZU7;D3YV76;G3UYQ0	P42208;E9Q3V6;F6WYM0;D3YYB1;D3Z3C0	Septin-2
Atg3	2.17432	26.0537	26.2351	23.9848	23.9554	23.9761	0	14.19	14	4	4	4	4	4	Q9CPX6	Q9CPX6	Ubiquitin-like-conjugating enzyme ATG3
Ssrp1	2.17415	28.2123	27.7136	25.7459	25.8318	24.3625	0	43.57	39	12	11	11	10	11	Q08943;A2AW05	Q08943;A2AW05	FACT complex subunit SSRP1
	2.17384	25.226	24.9155	23.1847	22.6092	22.2841	0	20.642	12	4	4	4	4	3	Q91V76;A0A1L1SSF8;A0A1L1ST86	Q91V76;A0A1L1SSF8	Ester hydrolase C11orf54 homolog
Atp6v1e1	2.17318	29.7147	29.0357	27.3428	27.0613	26.9974	0	27.888	36	11	11	11	11	9	P50518;A0A0N4SW07;A0A0N4SW34;A0A0N4SWA3;Q9D593	P50518;A0A0N4SW07	V-type proton ATPase subunit E 1
Cox20	2.17257	22.6757	22.2911	19.9528	20.6689	21.469	0.0032328	2.2487	2	1	1	1	1	1	Q9D7J4	Q9D7J4	Cytochrome c oxidase protein 20 homolog
Uqcrc2	2.17195	29.288	29.0348	26.9458	27.0331	26.2073	0	77.94	57	15	13	14	14	14	Q9DB77;A0A140LI98	Q9DB77	Cytochrome b-c1 complex subunit 2, mitochondrial
Cope	2.17094	25.6109	25.8317	23.7164	23.3843	23.1089	0	17.641	12	4	4	4	4	4	O89079;D3Z315;F6YFR7;E9Q6I5;F6XIG5	O89079;D3Z315;F6YFR7	Coatomer subunit epsilon
Cacybp	2.17061	27.5272	27.2651	25.2152	25.2359	24.99	0	22.76	26	7	7	7	7	7	Q9CXW3;A0A0A6YY29	Q9CXW3	Calcyclin-binding protein
Myo1f	2.17058	27.7513	28.0559	25.7979	25.6681	23.4184	0	79.129	45	19	16	18	15	15	Q8CG29;P70248;G3V011;G3UZR3	Q8CG29;P70248;G3V011	Unconventional myosin-If
Elavl1	2.16964	27.6991	27.7878	25.6602	25.4874	25.034	0	18.812	27	7	7	7	7	6	P70372	P70372	ELAV-like protein 1
Hnrnpul2	2.16946	29.1637	29.2052	26.9591	27.0708	25.3869	0	86.307	69	20	18	20	18	19	Q00PI9;A0A494BAL6	Q00PI9	Heterogeneous nuclear ribonucleoprotein U-like protein 2
Sacm1l	2.16869	26.7374	26.0288	24.2243	24.2045	22.4987	0	24.125	15	7	7	6	5	5	Q9EP69;A0A5F8MPK9;A0A1L1SR59	Q9EP69;A0A5F8MPK9	Phosphatidylinositide phosphatase SAC1
Arhgdia	2.1686	31.6834	31.6558	29.6585	29.3435	29.7911	0	118.27	69	12	12	12	12	11	Q99PT1	Q99PT1	Rho GDP-dissociation inhibitor 1
Tgm1	2.1679	27.2739	26.863	25.0521	24.749	22.8171	0	32.607	19	9	9	9	9	9	A0A0R4J293;Q9JLF6;A0A2I3BS02;A0A2I3BQN2;A0A2I3BRW9	A0A0R4J293;Q9JLF6	Protein-glutamine gamma-glutamyltransferase K
Rps6ka1	2.16775	25.7291	25.5148	23.4294	23.4789	21.4557	0	8.857	6	3	3	2	2	2	F6Q8A4;F6RQA2;Q505N6;E9PWV3;P18653;G3UZI3;B1AXP0;Q9WUT3;Q7TPS0;A2CEE7;E9QK39;E9PUP0;A2CEE5;A2CEE6;A0A668KLF8;A0A668KL31;B1AST7;E9PWX8;B1AXN8;E9QLW6;E9Q4Q9;A0A0A6YXG1;E9QPR4;A0A668KMA1;E9Q1M8;Q811L6;E9Q6G0;B1AST8;F6UG16;Q60592;B1B0X1;E9Q6Q5;A2CEE8;B2GVN8;B1AXN5;E9Q1Q1;Q8C0P0;Q9R1L5;A0A338P701	F6Q8A4;F6RQA2;Q505N6;E9PWV3;P18653;G3UZI3	Ribosomal protein S6 kinase;Ribosomal protein S6 kinase alpha-1
Echs1	2.16726	28.0968	28.0353	25.8642	25.9334	25.3564	0	47.527	31	7	7	7	5	6	Q8BH95	Q8BH95	Enoyl-CoA hydratase, mitochondrial
Ap2a2	2.16696	26.4833	26.2348	24.4615	23.9227	22.0142	0	24.977	18	8	7	8	7	7	P17427;A0A140LHG0	P17427	AP-2 complex subunit alpha-2
Metap1	2.16578	24.1486	23.0127	21.4139	21.4159	22.6388	0.0032468	2.2789	1	1	1	1	1	1	A0A0G2JFL1;Q8BP48	A0A0G2JFL1;Q8BP48	Methionine aminopeptidase 1
Arpc1b	2.16574	30.7912	30.672	28.7389	28.3928	27.8548	0	102.59	61	12	11	12	12	11	Q9WV32;Q91Z25;F6THG2;F6VVE6;D3Z6S0	Q9WV32;Q91Z25	Actin-related protein 2/3 complex subunit 1B
Bcl2l13	2.16526	23.7388	23.6628	21.5429	21.5281	21.0847	0	7.6749	6	2	2	2	2	2	P59017	P59017	Bcl-2-like protein 13
Grb2	2.16489	28.5425	28.6295	26.4918	26.3505	26.07	0	35.998	32	10	10	10	10	10	Q60631;B1AT92;B1AT95	Q60631;B1AT92	Growth factor receptor-bound protein 2
Apbb1ip	2.16484	27.7332	27.5138	25.5666	25.3507	24.5258	0	30.221	17	8	8	7	8	7	Q8R5A3;G5E867;F2Z3U3;S4R2K5;F2Z4B7	Q8R5A3	Amyloid beta A4 precursor protein-binding family B member 1-interacting protein
Fcho2	2.16479	23.9379	21.9924	20.8287	20.772	19.1883	0.0038869	2.0436	0	2	2	1	1	1	Q3UQN2;F6RG68;A0A286YDL7;J3QPQ1;A0A286YCL2	Q3UQN2;F6RG68;A0A286YDL7;J3QPQ1;A0A286YCL2	F-BAR domain only protein 2
Ddx1	2.1647	26.5928	25.8239	23.7207	24.3666	22.2613	0	21.684	19	7	7	5	5	7	Q91VR5;A0A1Y7VM48	Q91VR5	ATP-dependent RNA helicase DDX1
Mrpl47	2.16436	22.6024	22.218	20.1976	20.2941	19.6239	0.0085529	1.7748	1	1	1	1	1	1	Q8K2Y7	Q8K2Y7	39S ribosomal protein L47, mitochondrial
Pgm2l1	2.16398	20.6895	20.6559	18.4058	18.6117	16.8765	0	3.4657	1	1	1	1	1	1	Q8CAA7	Q8CAA7	Glucose 1,6-bisphosphate synthase
Dctn3	2.16377	23.6513	23.6081	21.342	21.5898	21.462	0	6.832	7	3	3	3	1	2	Q9Z0Y1;E9Q919	Q9Z0Y1;E9Q919	Dynactin subunit 3
Sri	2.16372	29.3707	29.548	27.3463	27.2449	27.1674	0	38.992	38	10	10	10	10	10	Q6P069	Q6P069	Sorcin
Pecam1	2.16312	24.5289	24.1934	22.0552	22.3409	20.4516	0	11.906	2	2	2	2	1	2	Q08481;B1ARB3;B1ARA9	Q08481;B1ARB3;B1ARA9	Platelet endothelial cell adhesion molecule
Sash3	2.16297	27.1839	26.9693	24.8404	24.9868	24.5636	0	23.699	18	6	6	6	6	6	Q8K352	Q8K352	SAM and SH3 domain-containing protein 3
Gltp	2.16256	27.022	26.8592	24.7604	24.7957	24.3265	0	15.715	9	4	4	4	4	4	Q9JL62;D3Z1H9;D3Z1H8	Q9JL62;D3Z1H9;D3Z1H8	Glycolipid transfer protein
Sqrdl	2.16228	24.84	24.7918	22.6992	22.608	21.1529	0	6.1042	2	3	3	3	3	3	Q9R112;H3BLH2;F6ZKZ3	Q9R112;H3BLH2	Sulfide:quinone oxidoreductase, mitochondrial
Pdia3	2.16199	32.7799	32.3955	30.3949	30.4566	28.935	0	179.99	153	33	33	32	32	32	P27773;F6Q404	P27773	Protein disulfide-isomerase A3
Lipa	2.16194	29.2099	28.3664	27.0419	26.2106	25.8917	0	42.727	35	9	8	8	8	9	Q9Z0M5	Q9Z0M5	Lysosomal acid lipase/cholesteryl ester hydrolase
	2.1618	27.7692	27.0423	25.035	25.4529	25.7366	0	25.247	11	5	5	5	5	5	A0A338P7E3;A0A338P711;C0HKG6;C0HKG5	A0A338P7E3;A0A338P711;C0HKG6;C0HKG5
Stat5b	2.16166	23.4211	23.4279	21.42	21.1057	19.4317	0.0041987	1.9599	3	1	1	1	1	1	P42232	P42232	Signal transducer and activator of transcription 5B
Snx2	2.16071	28.347	28.316	26.1687	26.173	24.8679	0	58.924	43	15	14	15	11	12	Q9CWK8	Q9CWK8	Sorting nexin-2
Napg	2.16049	25.8604	25.6188	23.5607	23.5975	22.8651	0	11.944	15	5	5	5	4	4	Q9CWZ7;D3Z4B2;A0A494BAE3;A0A494BA20;A0A494BBF5;A0A494BA49;A0A494BAX2	Q9CWZ7;D3Z4B2;A0A494BAE3;A0A494BA20	Gamma-soluble NSF attachment protein
Atp6v1f	2.16039	27.2927	26.5939	24.8484	24.7175	25.2692	0	15.022	15	4	4	4	4	4	Q9D1K2;A0A0N4SVE1;F7B2B4	Q9D1K2;A0A0N4SVE1;F7B2B4	V-type proton ATPase subunit F
Fus	2.16023	29.9004	29.7333	27.8046	27.5085	27.411	0	71.604	44	10	10	10	10	9	P56959;Q8CFQ9;G3UXT7;G3UZD2;Q91VQ2	P56959;Q8CFQ9;G3UXT7	RNA-binding protein FUS
Zyx	2.16015	30.2484	30.2007	28.1233	28.0055	27.0567	0	132.81	72	21	21	21	21	20	Q62523;Q7TQE2;A0A0N4SVP4;A0A0N4SVD2;A0A0N4SUX7	Q62523;Q7TQE2	Zyxin
Mrpl16	2.15994	21.5982	21.105	19.4029	18.9803	19.3409	0.00038358	2.9597	0	1	1	1	1	1	Q99N93	Q99N93	39S ribosomal protein L16, mitochondrial
Rasgrp2	2.15978	27.9944	27.6118	25.7522	25.5345	24.0181	0	66.898	30	11	11	10	10	10	Q9QUG9;D3YXD6;D3Z2F9;D3Z3N3;D3YZX2;D3YZP2;D6RDD3;D3YZP4;D3YZP1	Q9QUG9	RAS guanyl-releasing protein 2
Actr3	2.15943	31.3706	31.4056	29.2912	29.1661	28.2875	0	182.53	88	21	20	21	20	20	Q99JY9;A0A087WRA1;A0A087WP86;A0A087WQ14;Q641P0;A0A087WS98;A0A087WQ83;A0A087WPR6	Q99JY9	Actin-related protein 3
Ndufb4	2.15911	27.2888	26.7769	24.8543	24.8931	26.0209	0	14.198	11	3	3	3	3	3	Q9CQC7	Q9CQC7	NADH dehydrogenase [ubiquinone] 1 beta subcomplex subunit 4
Mthfsl	2.15873	22.9468	23.3023	21.1101	20.8215	21.1044	0.0007391	2.5113	3	1	1	1	1	1	Q8R1G5;L7N466	Q8R1G5;L7N466	5-formyltetrahydrofolate cyclo-ligase
Rab1b	2.15839	29.1681	29.0981	27.0645	26.885	26.5187	0	69.547	47	9	8	9	8	7	Q9D1G1;A0A494BA38;A0A494B945;A0A494BBL7;Q3TYH2;Q8K386	Q9D1G1;A0A494BA38;A0A494B945;A0A494BBL7	Ras-related protein Rab-1B
Tom1	2.15825	24.6812	24.5567	23.1198	21.8016	21.48	0	8.9704	6	2	2	2	2	1	O88746;Q3UDC3;A0A1D5RM45	O88746;Q3UDC3;A0A1D5RM45	Target of Myb protein 1
Dnajc8	2.15818	27.4359	27.619	25.5029	25.2357	25.1222	0	28.304	20	7	7	7	7	7	Q6NZB0;F6TQL3;A2ALF0;A2ALF3;F6QIL6;D3Z4I5;F7CXJ2;E9PZT4	Q6NZB0;F6TQL3;A2ALF0;A2ALF3	DnaJ homolog subfamily C member 8
Ptk2b	2.15815	26.479	26.6119	24.4544	24.3202	21.8386	0	21.536	16	8	8	8	7	7	E9Q2A6;Q9QVP9;Q3UDE9;F7CCX1;P34152;A0A5F8MPY3	E9Q2A6;Q9QVP9;Q3UDE9;F7CCX1	Protein-tyrosine kinase 2-beta
Rpl9	2.15798	26.7897	26.5908	24.2565	24.808	24.8196	0	34.773	27	7	6	6	6	5	P51410;A0A140T8T4;A0A0G2JES3;D3Z629;D3YZT0;A0A0G2JFQ3;S4R1R7	P51410;A0A140T8T4;A0A0G2JES3;D3Z629	60S ribosomal protein L9
Tpd52l2	2.15772	27.5388	26.761	24.9945	24.9899	24.7836	0	19.17	15	5	5	5	4	4	Q9CYZ2;A2AUD5;Q3TAI4;V9GWU5;Q3TUJ9;F6VQ81;Q8BKP1	Q9CYZ2;A2AUD5;Q3TAI4;V9GWU5;Q3TUJ9;F6VQ81;Q8BKP1	Tumor protein D54
Gps1	2.1577	22.5267	22.5466	20.4175	20.3404	19.6586	0.00075586	2.7582	2	1	1	1	1	1	Q99LD4;G3UXW9;A0A140LJB7;Q3MIA8;B1ATU4	Q99LD4;G3UXW9;A0A140LJB7;Q3MIA8;B1ATU4	COP9 signalosome complex subunit 1
Adnp	2.15696	22.8655	22.2243	20.706	20.0699	17.8947	0	4.8709	1	2	2	2	2	1	Q9Z103	Q9Z103	Activity-dependent neuroprotector homeobox protein
Ndufb7	2.15695	24.4563	23.9417	21.9281	22.156	22.5104	0.0018355	2.45	4	1	1	1	1	1	Q9CR61	Q9CR61	NADH dehydrogenase [ubiquinone] 1 beta subcomplex subunit 7
Calr	2.15626	32.2527	31.8532	29.9137	29.8797	28.7712	0	173.49	115	18	18	16	16	17	P14211	P14211	Calreticulin
Calu	2.15544	27.3156	26.9413	24.9132	25.0329	24.4307	0	18.495	17	6	6	6	6	6	O35887;G3V004;G3UXA8;G3UWR0;G3UWV3;G3UXA3;G3UY49	O35887;G3V004;G3UXA8;G3UWR0;G3UWV3	Calumenin
Plekho2	2.15535	28.456	28.3424	26.3115	26.1762	25.169	0	105.96	36	14	13	14	14	13	Q8K124	Q8K124	Pleckstrin homology domain-containing family O member 2
Hnrnpa2b1	2.15513	31.5934	31.7942	29.4208	29.6566	28.6678	0	138.12	84	20	20	19	19	18	O88569;A0A0N4SUM2	O88569	Heterogeneous nuclear ribonucleoproteins A2/B1
Pfdn4	2.15485	23.502	22.7831	20.9924	20.9831	22.8862	0	4.307	1	1	1	1	1	1	Q3UWL8;E9Q4Q8;E9Q8R1;Q6P0X1;E9Q6U4	Q3UWL8;E9Q4Q8;E9Q8R1;Q6P0X1;E9Q6U4	Prefoldin subunit 4
Atp5b	2.15423	32.6534	32.2008	30.3259	30.2199	28.8761	0	210.28	161	24	24	24	24	24	P56480	P56480	ATP synthase subunit beta, mitochondrial
Rbm5	2.15355	24.7492	23.7956	22.0365	22.2012	20.4995	0	5.2578	2	3	3	3	2	2	Q91YE7;S4R1N4;S4R1V5;S4R184;A0A0A6YX44;S4R1U7	Q91YE7	RNA-binding protein 5
Prpf3	2.15354	24.9336	24.7094	23.5946	21.7413	21.1284	0	5.2311	4	3	3	3	3	1	Q922U1	Q922U1	U4/U6 small nuclear ribonucleoprotein Prp3
Pip4k2a	2.15307	28.4473	28.0084	26.1247	26.0249	25.3643	0	54.595	25	8	8	8	7	7	O70172;F6RJE8	O70172	Phosphatidylinositol 5-phosphate 4-kinase type-2 alpha
Bub3	2.15237	26.5605	26.6139	24.3894	24.4803	23.9733	0	25.842	14	7	7	7	6	7	Q9WVA3;A0A140LHA2;A0A140LJ21;A0A140LIM5;A0A140LI47	Q9WVA3;A0A140LHA2	Mitotic checkpoint protein BUB3
Scarb2	2.15204	29.875	28.8189	27.4239	26.9659	26.1969	0	63.97	48	10	10	10	10	10	O35114	O35114	Lysosome membrane protein 2
Ndufs5	2.15181	27.0324	26.817	24.8359	24.7099	25.6361	0	9.4026	12	4	4	4	4	4	Q99LY9;B1ARW4	Q99LY9;B1ARW4	NADH dehydrogenase [ubiquinone] iron-sulfur protein 5;NADH dehydrogenase [ubiquinone] iron-sulfur protein 5, N-terminally processed
Dnajc13	2.15163	22.5855	22.6677	20.6991	20.2508	17.1158	0	4.7956	5	2	2	2	2	2	G3X922;D4AFX7	G3X922;D4AFX7
Purb	2.15116	27.0353	27.0556	24.9112	24.8773	25.1685	0	81.513	18	6	6	6	5	5	O35295	O35295	Transcriptional activator protein Pur-beta
Prss34	2.15027	29.8943	29.9721	27.4091	28.1568	27.1482	0	30.429	43	9	8	9	8	9	Q80UR4	Q80UR4
Mndal	2.15011	28.1985	27.9275	25.872	25.9538	24.5034	0	62.356	32	12	12	12	11	12	D0QMC3;A0A087WRA4;A0A087WQG9;A0A087WSH9	D0QMC3;A0A087WRA4	Myeloid cell nuclear differentiation antigen-like protein
Igtp	2.1495	27.4466	27.1144	25.1682	25.0938	24.1222	0	40.052	23	8	8	8	8	8	Q9DCE9	Q9DCE9
Pdlim1	2.14926	28.5338	28.0919	26.3136	26.0136	25.6213	0	100.81	40	12	12	12	11	11	O70400;S4R1V0	O70400;S4R1V0	PDZ and LIM domain protein 1
Nt5c3a	2.14914	24.7501	24.8699	22.6764	22.6453	21.6449	0	6.052	6	3	3	3	3	3	Q9D020	Q9D020	Cytosolic 5-nucleotidase 3A
Fuca1	2.14853	22.9442	22.1254	20.4443	20.3283	19.483	0.00075273	2.6812	3	1	1	1	1	1	Q99LJ1	Q99LJ1	Tissue alpha-L-fucosidase
Ist1	2.14816	25.4897	25.7587	23.6357	23.3164	23.465	0	5.6766	6	5	3	4	3	4	Q9CX00	Q9CX00	IST1 homolog
Mpp1	2.14794	25.9835	26.4642	24.439	23.7128	22.8416	0	23.879	16	7	4	6	6	4	P70290;B7ZCL8;A2AN84;B7ZCL9;B7ZCM0;D6RFD5;B7ZCM1	P70290;B7ZCL8;A2AN84;B7ZCL9	55 kDa erythrocyte membrane protein
Numa1	2.14778	27.1505	27.4517	25.0208	25.2858	21.7567	0	64.799	26	16	15	16	13	14	E9Q7G0;A0A1B0GSW3;A0A1B0GT61;F6ZQA3	E9Q7G0;A0A1B0GSW3;A0A1B0GT61
Cd68	2.14729	30.6972	29.8497	28.3049	27.9474	28.1599	0	14.181	15	5	5	5	5	5	P31996;A0A0R4J1C8	P31996;A0A0R4J1C8	Macrosialin
Lbh	2.14675	24.6738	24.7522	22.5609	22.5715	23.6852	0	10.905	2	2	2	2	2	2	Q9CX60	Q9CX60	Protein LBH
Lrrc59	2.14664	28.1427	27.6076	25.9376	25.5194	25.3844	0	22.757	21	7	6	6	7	7	Q922Q8	Q922Q8	Leucine-rich repeat-containing protein 59
Mesdc2	2.14645	25.7005	25.6121	23.3676	23.6522	23.63	0	9.6909	9	5	5	5	4	4	Q9ERE7;D3YVR4;F6SWV4	Q9ERE7;D3YVR4	LDLR chaperone MESD
Dpysl2	2.14609	28.8374	28.5623	26.6589	26.4485	25.0456	0	123.05	51	18	17	17	17	15	O08553;Q62188;Q3TT92;E9PWE8;P97427;Q6P1J1;Q71H75	O08553	Dihydropyrimidinase-related protein 2
Vrk2	2.14603	22.4805	23.1919	20.3035	21.0769	19.317	0	5.4573	2	2	1	2	1	2	Q8BN21	Q8BN21	Serine/threonine-protein kinase VRK2
Ywhaz	2.1458	32.2692	32.4619	30.2789	30.1606	29.855	0	218.4	120	15	15	15	15	14	P63101;A0A2I3BQ03;D3YXN6;D3YXF4;D3YW45	P63101;A0A2I3BQ03	14-3-3 protein zeta/delta
Tradd	2.1455	22.8089	22.6363	20.4872	20.667	20.0192	0.00074906	2.6406	3	1	1	1	1	1	Q3U0V2	Q3U0V2	Tumor necrosis factor receptor type 1-associated DEATH domain protein
Txndc17	2.14511	26.0363	25.9437	23.9473	23.7425	24.478	0	6.6414	6	2	2	2	2	2	Q9CQM5	Q9CQM5	Thioredoxin domain-containing protein 17
Dlst	2.14507	28.1977	28.0207	25.8904	26.0379	24.8208	0	55.159	33	6	6	6	6	6	Q9D2G2	Q9D2G2	Dihydrolipoyllysine-residue succinyltransferase component of 2-oxoglutarate dehydrogenase complex, mitochondrial
Hsp90ab1	2.14392	32.7405	32.4093	30.4441	30.4178	28.8325	0	312.17	176	40	39	38	37	39	P11499;E9Q3D6;E9PX27;D3Z1R1;E9Q0C3	P11499	Heat shock protein HSP 90-beta
Gnas	2.14368	25.2971	25.3385	23.3692	22.9791	22.2928	0	9.704	4	2	2	2	2	2	P63094;Q6R0H7;Z4YKV1;A0A571BEI3;A0A571BEG2;A0A571BE25;A0A571BEM2	P63094;Q6R0H7;Z4YKV1;A0A571BEI3	Guanine nucleotide-binding protein G(s) subunit alpha isoforms short;Guanine nucleotide-binding protein G(s) subunit alpha isoforms XLas
Psmc5	2.14355	26.3129	26.1735	24.1958	24.0035	22.9545	0	25.83	19	8	8	8	8	7	P62196;Q8K1K2	P62196;Q8K1K2	26S protease regulatory subunit 8
Mrpl3	2.14293	23.0267	22.215	20.5258	20.43	19.6396	0.0042002	1.9607	2	1	1	1	1	1	Q99N95;D3Z456	Q99N95;D3Z456	39S ribosomal protein L3, mitochondrial
Rps16	2.14061	29.5814	29.3659	27.3533	27.3128	27.3124	0	25.92	35	9	9	9	9	9	P14131	P14131	40S ribosomal protein S16
Wars	2.13995	25.7163	25.567	23.4628	23.5406	22.1309	0	12.3	9	3	3	3	2	2	P32921	P32921	Tryptophan--tRNA ligase, cytoplasmic;T1-TrpRS;T2-TrpRS
Mapre1	2.13989	29.3714	29.116	27.1708	27.0368	26.6367	0	91.451	44	11	11	11	11	11	Q61166	Q61166	Microtubule-associated protein RP/EB family member 1
Tagln2	2.13953	31.3538	31.3193	29.1721	29.222	28.8244	0	68.372	87	14	14	14	13	14	Q9WVA4;A0A0A6YXG6;Q9R1Q8	Q9WVA4	Transgelin-2
Nucb1	2.13848	26.7934	26.705	24.8646	24.3569	23.2418	0	30.342	21	9	8	8	8	6	Q02819;A0A1C7CYU3;A0A1B0GR41;A0A1B0GR92;A0A1B0GS16;A0A1B0GT83	Q02819;A0A1C7CYU3;A0A1B0GR41	Nucleobindin-1
Rock2	2.13846	24.6617	24.5936	22.8073	22.171	19.6078	0	28.075	4	3	3	3	3	2	P70336;A0A1Y7VMN0;F8VPK5	P70336;A0A1Y7VMN0;F8VPK5	Rho-associated protein kinase 2;Rho-associated protein kinase
Flna	2.138	33.8503	33.724	31.6803	31.618	28.0176	0	323.31	523	112	109	109	106	107	Q8BTM8;B7FAU9;B7FAV1;F6XC15;J3JS91;F6Z2C0;Q8VHX6;Q80X90;A0A668KLG7;F7AVL7	Q8BTM8;B7FAU9;B7FAV1	Filamin-A
Iqgap1	2.13797	31.6485	31.4894	29.5704	29.2915	26.4923	0	323.31	276	70	68	67	67	64	Q9JKF1;A0A0U1RNG5;A0A0U1RPU3;A0A0U1RPI2	Q9JKF1	Ras GTPase-activating-like protein IQGAP1
Ppih	2.13741	24.3138	24.3425	21.9844	22.3969	22.1669	0	5.1701	5	3	3	3	2	3	A2BGI8;Q9D868;A2BGI9	A2BGI8;Q9D868;A2BGI9	Peptidyl-prolyl cis-trans isomerase;Peptidyl-prolyl cis-trans isomerase H
Ddx19a	2.13688	24.9305	24.2859	22.1939	22.7487	21.1304	0	11.361	5	3	3	2	2	3	Q61655;Q8BZY3	Q61655	ATP-dependent RNA helicase DDX19A
Prg2	2.13671	30.7264	30.4026	28.2452	28.6104	28.6997	0	33.179	21	4	4	4	4	4	Q61878	Q61878	Bone marrow proteoglycan;Eosinophil granule major basic protein
Pycr2	2.13647	25.493	25.2166	23.3825	23.0542	22.4876	0	10.435	8	4	3	4	3	4	Q922Q4;Q922W5;A2ABZ2	Q922Q4	Pyrroline-5-carboxylate reductase 2
Tuba1b	2.13584	32.6401	32.5233	30.5137	30.378	29.4864	0	220.69	140	26	25	24	23	24	P05213;A0A2R8VHF3	P05213	Tubulin alpha-1B chain
Mogs	2.13572	26.6457	26.3889	24.4689	24.2942	22.4963	0	28.112	18	8	8	8	7	7	Q80UM7	Q80UM7	Mannosyl-oligosaccharide glucosidase
Cyba	2.13567	26.7367	26.7767	24.787	24.4551	25.247	0	10.577	8	2	2	2	2	2	Q61462	Q61462	Cytochrome b-245 light chain
Nans	2.13523	26.5166	26.998	24.6386	24.6055	24.0695	0	55.204	16	9	8	8	8	8	Q99J77	Q99J77
Pddc1	2.13496	23.1177	22.9369	20.7555	21.0292	21.1568	0.0021922	2.4307	4	1	1	1	1	1	Q8BFQ8	Q8BFQ8	Parkinson disease 7 domain-containing protein 1
Mdh1	2.13489	30.1695	30.4776	28.2439	28.1334	27.819	0	58.462	43	10	9	10	9	9	P14152;A0A5F8MPN8;B1ATQ3	P14152;A0A5F8MPN8	Malate dehydrogenase, cytoplasmic
Acadvl	2.13488	27.8232	27.4034	25.6451	25.3117	23.5658	0	59.363	40	15	15	15	11	10	P50544;B1AR28	P50544;B1AR28	Very long-chain specific acyl-CoA dehydrogenase, mitochondrial
Nedd4	2.13345	25.461	25.0582	23.1909	23.0615	21.2456	0	15.128	12	5	5	5	5	4	P46935;A0A571BEP7;A0A571BDN7;V9GWV8;Q3V335;V9GXK3	P46935;A0A571BEP7;A0A571BDN7	E3 ubiquitin-protein ligase NEDD4
Cox4i1	2.13317	30.0328	29.7209	27.7073	27.78	27.7206	0	43.157	34	7	7	7	7	7	P19783;M0QWX7;D6RG40	P19783	Cytochrome c oxidase subunit 4 isoform 1, mitochondrial
Cox6b1	2.13293	29.1591	28.9335	26.8902	26.9365	27.7612	0	15.511	14	5	5	5	5	5	P56391;A0A140LIU3	P56391;A0A140LIU3	Cytochrome c oxidase subunit 6B1
Bin1	2.13218	26.9442	26.8102	24.8326	24.6575	23.3681	0	32.025	13	5	5	5	5	5	O08539;A0A3Q4EBK4;Q6P1B9	O08539;A0A3Q4EBK4;Q6P1B9	Myc box-dependent-interacting protein 1
Hsd17b12	2.13155	26.374	25.8533	23.7989	24.1653	23.4314	0	10.622	9	4	4	4	3	4	O70503	O70503	Very-long-chain 3-oxoacyl-CoA reductase
Treml1	2.13152	28.6712	28.4919	26.5742	26.3258	26.7115	0	63.779	30	9	9	9	8	9	Q8K558;A6XA75	Q8K558	Trem-like transcript 1 protein
Psmc2	2.13052	27.1222	27.5679	25.2423	25.1868	23.8484	0	75.479	32	13	9	12	12	11	P46471;Q8BVQ9	P46471;Q8BVQ9	26S protease regulatory subunit 7
Ero1l	2.1302	24.1908	24.1993	22.0671	22.0626	20.6339	0	20.356	3	2	2	2	2	2	Q8R180	Q8R180	ERO1-like protein alpha
Coro1a	2.12927	32.2137	32.2766	30.1493	30.0825	29.2945	0	81.544	116	21	21	20	18	17	O89053;G3UYK8;A0A0U1RPY8;D3YW57;G3UX53;D3YXM2	O89053;G3UYK8	Coronin-1A;Coronin
Set	2.1289	28.7782	28.9374	26.7251	26.7327	26.9867	0	57.464	26	7	7	7	7	7	Q9EQU5;A2BE93;A2BE92	Q9EQU5;A2BE93;A2BE92	Protein SET
Capzb	2.12817	30.6069	30.44	28.4978	28.2927	27.9164	0	112.65	69	17	17	15	15	15	A2AMW0;F7CAZ6	A2AMW0;F7CAZ6
Gsr	2.12778	28.3649	28.607	26.3806	26.3358	25.3951	0	39.286	25	7	6	7	7	7	P47791	P47791	Glutathione reductase, mitochondrial
Ehbp1l1	2.12772	25.0488	24.6977	23.0614	22.4296	19.6778	0	13.922	6	4	4	4	4	3	Q99MS7;E9QP49;A0A494BBL8;A0A494B9G7;G5E8Y6;A0A494BA91	Q99MS7;E9QP49;A0A494BBL8;A0A494B9G7;G5E8Y6;A0A494BA91	EH domain-binding protein 1-like protein 1
Ppa1	2.1274	25.4794	25.8318	23.3691	23.6873	22.7934	0	19.356	8	6	5	6	5	6	Q9D819	Q9D819	Inorganic pyrophosphatase
Fam50a	2.12713	23.0683	22.8091	20.6412	20.9819	20.2427	0	3.9854	1	1	1	1	1	1	Q9WV03	Q9WV03	Protein FAM50A
Rab27b	2.1266	27.5019	27.3292	25.4596	25.1183	25.132	0	36.879	29	9	8	9	8	8	Q99P58	Q99P58	Ras-related protein Rab-27B
Naca	2.12397	29.1027	28.5756	26.7301	26.7003	23.4842	0	36.67	22	4	4	4	4	4	P70670;Q60817	P70670;Q60817	Nascent polypeptide-associated complex subunit alpha, muscle-specific form;Nascent polypeptide-associated complex subunit alpha
Ndufa12	2.12383	25.9655	25.6136	23.6128	23.7187	23.9265	0	15.051	16	4	4	4	4	4	Q7TMF3;A0A0R4J275;F6RBR6	Q7TMF3;A0A0R4J275;F6RBR6	NADH dehydrogenase [ubiquinone] 1 alpha subcomplex subunit 12
Prorsd1	2.12347	22.9982	22.92	20.8825	20.7888	20.7984	0.00075557	2.7579	1	1	1	1	1	1	Q9D820	Q9D820	Prolyl-tRNA synthetase associated domain-containing protein 1
Sars	2.123	27.5738	27.2483	25.434	25.1422	24.0176	0	41.771	29	12	12	12	11	11	P26638;Q8C483;A2AFS0;A2AFS1	P26638;Q8C483;A2AFS0;A2AFS1	Serine--tRNA ligase, cytoplasmic
Spcs2	2.12289	25.8251	25.376	23.5702	23.3851	23.3284	0	14.905	6	3	3	3	3	3	Q9CYN2;A0A140LHR3;A0A140LJ01;A0A140LHG8;A0A140LJG6;A0A140LIK0;A0A140LHW5	Q9CYN2;A0A140LHR3;A0A140LJ01;A0A140LHG8;A0A140LJG6;A0A140LIK0	Signal peptidase complex subunit 2
Iqgap2	2.12281	26.8001	26.6235	24.7695	24.4085	21.6393	0	18.477	13	6	6	6	5	5	Q3UQ44	Q3UQ44	Ras GTPase-activating-like protein IQGAP2
Atox1	2.12276	30.7588	30.4855	28.615	28.3839	29.9265	0	135.02	28	5	5	5	5	5	O08997	O08997	Copper transport protein ATOX1
Psmd4	2.12276	26.896	26.9197	24.876	24.6942	24.3992	0	31.988	13	7	7	7	6	6	O35226	O35226	26S proteasome non-ATPase regulatory subunit 4
Rtn4	2.12147	27.6007	27.5702	25.6232	25.3048	23.4261	0	49.208	17	8	7	8	8	7	Q99P72	Q99P72	Reticulon-4
Lonp1	2.12107	25.954	25.6502	23.7642	23.598	21.6813	0	13.568	12	6	6	6	5	4	Q8CGK3	Q8CGK3	Lon protease homolog, mitochondrial
Tmed7	2.12043	25.7658	25.4552	23.7778	23.2023	23.3363	0	9.8263	5	3	3	3	3	3	D3YZZ5;E9Q7G1	D3YZZ5;E9Q7G1
Psmb2	2.12012	27.0527	27.321	25.062	25.0715	25.1687	0	15.631	20	6	5	6	5	6	Q9R1P3	Q9R1P3	Proteasome subunit beta type-2
Gzma	2.11917	27.139	27.5151	25.3416	25.0741	24.637	0	40.017	17	8	7	8	6	7	P11032	P11032	Granzyme A
Tcirg1	2.11915	29.1311	28.2365	26.8925	26.2369	25.2378	0	70.61	34	10	10	10	9	10	Q9JHF5;F6XRE6;F6ZFB8	Q9JHF5	V-type proton ATPase subunit a
Ywhab	2.11829	29.7731	29.74	27.6442	27.6324	27.2483	0	224.58	50	7	7	7	7	7	Q9CQV8;A2A5N1	Q9CQV8;A2A5N1	14-3-3 protein beta/alpha;14-3-3 protein beta/alpha, N-terminally processed
Zcchc8	2.11827	21.1967	21.4007	19.0404	19.3205	17.6951	0.003196	2.133	1	1	1	1	1	1	Q9CYA6	Q9CYA6	Zinc finger CCHC domain-containing protein 8
Parvg	2.11699	25.2516	25.1648	23.2505	22.9319	22.4222	0	8.5202	5	2	2	2	2	2	Q9ERD8;E9PYG5;A6PW97	Q9ERD8;E9PYG5;A6PW97	Gamma-parvin
Pura	2.11676	26.6986	26.6512	24.4202	24.696	24.9756	0	98.442	19	4	4	4	4	4	P42669	P42669	Transcriptional activator protein Pur-alpha
Ywhag	2.11673	27.6886	27.8459	25.6981	25.6029	25.0685	0	62.756	24	6	6	6	6	6	P61982	P61982	14-3-3 protein gamma;14-3-3 protein gamma, N-terminally processed
Sptbn1	2.11646	29.4429	29.1809	27.3671	27.0238	23.4682	0	225.85	109	43	39	40	40	37	Q62261;A0A0A0MQG2;Q68FG2	Q62261;A0A0A0MQG2	Spectrin beta chain, non-erythrocytic 1
As3mt	2.11625	24.8143	24.7346	22.7947	22.5217	21.3751	0	10.155	10	3	3	3	3	3	Q91WU5;A0A494B985	Q91WU5	Arsenite methyltransferase
Ndufv2	2.11599	26.8605	26.4558	24.4235	24.6609	24.1628	0	22.523	16	5	5	4	5	4	Q9D6J6;M0QWP9;D6RGN4	Q9D6J6	NADH dehydrogenase [ubiquinone] flavoprotein 2, mitochondrial
Arrb1	2.11576	26.1232	25.63	23.7632	23.7584	22.8008	0	18.865	12	6	6	5	5	5	Q8BWG8;J3QNU6;E0CYB1;E0CY53	Q8BWG8;J3QNU6	Beta-arrestin-1
Itgad	2.11566	27.7392	27.2189	25.6537	25.0731	23.1883	0	40.599	36	13	12	13	13	10	Q3V0T4;H3BKX8;E9PXZ7	Q3V0T4;H3BKX8;E9PXZ7	Integrin alpha-D
Pip4k2c	2.11528	23.3445	22.9925	21.2252	20.8812	20.1567	0	2.9755	3	1	1	1	1	1	Q91XU3	Q91XU3	Phosphatidylinositol 5-phosphate 4-kinase type-2 gamma
Lpxn	2.11515	25.0358	25.1274	23.0908	22.8421	22.0609	0	10.782	5	3	3	3	3	3	Q99N69;A0A494B990	Q99N69	Leupaxin
Nsfl1c	2.11415	27.4757	27.4778	25.4515	25.2736	24.3176	0	54.42	27	12	10	12	9	8	Q9CZ44;A2AT02	Q9CZ44;A2AT02	NSFL1 cofactor p47
Lcp1	2.11379	33.648	33.5622	31.6372	31.3454	29.6974	0	323.31	290	44	44	44	44	43	Q61233;D3YZ25;D3YVW8;D3Z7D9;D3Z311;Q99K51;A0A1C7CYV0;B1AX58	Q61233	Plastin-2
Rps7	2.11343	29.2723	28.9641	27.2573	26.7523	27.107	0	43.449	47	6	6	6	6	5	P62082	P62082	40S ribosomal protein S7
Atp1b3	2.11271	26.0316	25.4515	23.9517	23.3059	23.165	0	10.193	11	5	4	4	4	3	P97370	P97370	Sodium/potassium-transporting ATPase subunit beta-3
Slc4a1	2.1118	28.376	27.0675	25.8759	25.3441	23.974	0	98.874	35	12	12	12	10	8	P04919	P04919	Band 3 anion transport protein
Hmgb3	2.11021	25.0997	25.7031	24.089	22.4934	24.1837	0	6.3629	6	2	1	2	2	2	O54879;A2AP78	O54879;A2AP78	High mobility group protein B3
Hmgn5	2.10967	22.2571	22.6476	20.2316	20.4537	18.9065	0.0038692	1.993	1	1	1	1	1	1	Q9JL35	Q9JL35	High mobility group nucleosome-binding domain-containing protein 5
Atp5i;Atp5k	2.10789	28.3631	27.8512	25.9471	26.0514	27.8417	0	9.878	8	2	2	2	2	2	Q06185;Q8BTB6	Q06185;Q8BTB6	ATP synthase subunit e, mitochondrial
Ptpn6	2.10621	30.7073	30.596	28.544	28.5469	26.7839	0	131.56	101	30	28	28	27	27	P29351;G3UYY5;G3UZU6;G3UXM2	P29351	Tyrosine-protein phosphatase non-receptor type 6
Tma16	2.10556	26.8027	26.1095	24.6055	24.0956	24.3358	0	46.369	21	7	7	6	7	6	Q9CR02	Q9CR02	Translation machinery-associated protein 16
Tkt	2.10538	30.8923	31.4099	28.9494	29.1421	27.7715	0	131.34	112	27	25	25	25	25	P40142;A0A286YE28;E0CY51	P40142;A0A286YE28	Transketolase
Gtf2f1	2.10532	25.9076	25.524	23.9084	23.3126	22.7854	0	10.527	3	5	5	5	5	3	Q3THK3	Q3THK3	General transcription factor IIF subunit 1
Smchd1	2.1052	23.6222	23.9227	21.6236	21.7109	18.2603	0	6.3442	5	3	2	3	3	3	Q6P5D8	Q6P5D8	Structural maintenance of chromosomes flexible hinge domain-containing protein 1
Sf3a1	2.10465	27.5813	27.5853	25.4068	25.5505	23.5277	0	31.274	27	12	12	12	10	11	Q8K4Z5	Q8K4Z5	Splicing factor 3A subunit 1
Ctsh	2.10444	29.7947	29.2725	27.4913	27.367	26.8546	0	89.602	37	6	6	6	6	6	P49935;A0A087WR20;D3Z437	P49935;A0A087WR20	Pro-cathepsin H;Cathepsin H mini chain;Cathepsin H;Cathepsin H heavy chain;Cathepsin H light chain
Acin1	2.10438	27.8532	27.5874	25.7479	25.4839	22.8988	0	42.251	34	14	14	14	14	12	Q9JIX8;F6RJ39;Q52KR6;B8JJ92;B8JJ91;B8JJ89;F6Q8C0	Q9JIX8;F6RJ39;Q52KR6;B8JJ92;B8JJ91	Apoptotic chromatin condensation inducer in the nucleus
Rab5c	2.10435	28.7273	28.3768	26.4426	26.4529	26.4029	0	51.189	29	7	7	7	6	7	P35278;Q8C266	P35278;Q8C266	Ras-related protein Rab-5C
Sh3bgrl	2.10354	26.0536	26.0381	24.172	23.7127	24.3512	0	14.727	7	4	4	4	4	4	Q9JJU8	Q9JJU8	SH3 domain-binding glutamic acid-rich-like protein
Pdia6	2.10325	30.1317	29.8387	27.9561	27.8078	27.206	0	101.24	52	13	13	13	13	13	F7DBQ0;Q3TML0;Q922R8	F7DBQ0;Q3TML0;Q922R8	Protein disulfide-isomerase A6
Igsf6	2.10238	22.8407	22.6209	20.7751	20.4818	20.8677	0.0025473	2.3818	0	1	1	1	1	1	P0C6B7	P0C6B7	Immunoglobulin superfamily member 6
Add3	2.10221	25.8426	25.5729	23.6498	23.5614	22.2077	0	11.423	6	5	5	4	4	4	Q9QYB5;A0A494B9K4;A0A494BAX9;A0A494B969;A0A494BBK1	Q9QYB5;A0A494B9K4	Gamma-adducin
Tpp2	2.10185	25.6383	25.2755	23.2247	23.4854	20.7694	0	28.165	8	6	5	6	4	6	Q64514;A0A087WRC0;Q05DJ9;A0A087WP19;A0A087WQR6	Q64514;A0A087WRC0;Q05DJ9	Tripeptidyl-peptidase 2
Dctn2	2.1017	27.7256	27.3964	25.6207	25.2979	24.5505	0	57.908	34	12	12	12	11	10	Q99KJ8	Q99KJ8	Dynactin subunit 2
Psmd12	2.10079	22.7736	22.6704	20.4023	20.8402	19.3844	0	3.228	4	1	1	1	1	1	Q9D8W5;Q3TRH2	Q9D8W5;Q3TRH2	26S proteasome non-ATPase regulatory subunit 12
Sars2	2.10061	23.6695	23.4028	21.4728	21.3982	19.9857	0	5.2832	1	1	1	1	1	1	Q9JJL8	Q9JJL8	Serine--tRNA ligase, mitochondrial
Cap1	2.10025	32.3096	32.1087	30.2523	29.9655	28.7609	0	215.54	132	23	21	23	22	20	P40124;B1ARS0;Q9CYT6;D3YTR7;A0A286YCS6	P40124	Adenylyl cyclase-associated protein 1
Samhd1	2.10024	23.6238	24.495	22.0878	21.8306	22.8307	0.0018389	2.4584	4	1	1	1	1	1	E0CXZ5	E0CXZ5
Capns1	2.10011	27.7383	27.598	25.6843	25.4518	25.5135	0	61.932	24	8	8	8	7	7	A0A0R4IZW8;O88456;A0A0R4J1C2;Q9D7J7	A0A0R4IZW8;O88456;A0A0R4J1C2	Calpain small subunit 1
Mccc2	2.09931	22.9603	23.0836	20.3827	21.4626	19.5375	0	4.2666	1	2	2	2	1	2	Q3ULD5;Q6PD20	Q3ULD5;Q6PD20	Methylcrotonoyl-CoA carboxylase beta chain, mitochondrial
Gnai2	2.09909	30.0486	29.5957	27.8719	27.5742	27.0531	0	182.52	64	16	16	16	16	15	P08752;A0A0A6YWA9;B2RSH2;P18872;P20612;P50149;Q3V3I2;A2AE32;Q8CGK7;A2A610;A2AE31;Q8C040;D3Z2M7;Q8BHK8;F6QPU5;Q66L47	P08752;A0A0A6YWA9	Guanine nucleotide-binding protein G(i) subunit alpha-2
Atp5d	2.0981	29.0245	28.6782	26.7069	26.7996	27.8408	0	21.422	12	3	3	3	3	3	Q9D3D9;D3Z7S4	Q9D3D9	ATP synthase subunit delta, mitochondrial
Pgm1;Pgm2	2.09803	26.2082	26.3497	24.2879	24.074	22.4965	0	16.639	18	8	8	8	8	7	Q9D0F9;A2CEK3	Q9D0F9;A2CEK3	Phosphoglucomutase-1
Lrrc25	2.09779	25.9306	25.7901	23.773	23.7522	23.2578	0	10.225	7	3	3	3	3	3	Q8K1T1	Q8K1T1	Leucine-rich repeat-containing protein 25
Gmps	2.09772	23.6401	23.847	21.8386	21.453	19.6596	0	9.0511	4	3	2	3	3	2	Q3THK7	Q3THK7	GMP synthase [glutamine-hydrolyzing]
Rplp2	2.09732	30.4545	30.1804	28.251	28.1894	29.3039	0	110.25	34	8	8	8	8	8	P99027;A0A5F8MPY2	P99027;A0A5F8MPY2	60S acidic ribosomal protein P2
Lsp1	2.09725	31.432	31.402	29.5166	29.1228	28.5527	0	299.1	68	13	13	13	13	13	P19973	P19973	Lymphocyte-specific protein 1
Apoa1bp	2.09704	25.4039	25.3129	23.2648	23.2578	22.8546	0	12.228	5	2	2	2	2	2	Q8K4Z3	Q8K4Z3	NAD(P)H-hydrate epimerase
Snrpd2	2.09666	29.478	29.3554	27.5054	27.1347	27.9158	0	45.19	34	8	7	8	7	7	P62317	P62317	Small nuclear ribonucleoprotein Sm D2
Echdc1	2.09582	20.8702	20.7812	18.802	18.6578	17.882	0	3.098	1	1	1	1	1	1	Q9D9V3	Q9D9V3	Ethylmalonyl-CoA decarboxylase
Gar1	2.0954	27.3388	27.1178	25.0224	25.2434	24.8354	0	18.589	17	6	6	6	5	6	Q9CY66;D3YZ09;F6SL78	Q9CY66;D3YZ09	H/ACA ribonucleoprotein complex subunit 1
Mtatp8	2.09533	27.0485	26.7771	24.8805	24.7544	26.6366	0	3.9014	4	1	1	1	1	1	P03930	P03930	ATP synthase protein 8
Col4a1;Col4a5	2.09452	25.369	25.7022	23.3344	23.5477	20.5997	0	3.7736	10	2	2	2	2	2	P02463;Q63ZW6;F7CK55;A0A1B0GRC0;A0A1B0GSI7	P02463;Q63ZW6;F7CK55;A0A1B0GRC0;A0A1B0GSI7	Collagen alpha-1(IV) chain;Arresten
Chd4	2.09416	27.6057	27.3731	25.4366	25.3539	22.3375	0	65.29	42	18	18	18	15	14	Q6PDQ2;E9QAS5;E9QAS4;B1AR17;F7C528;E9Q614;F6WR45	Q6PDQ2;E9QAS5;E9QAS4	Chromodomain-helicase-DNA-binding protein 4
Aldh4a1	2.09379	26.1694	25.9291	24.2455	23.6655	22.662	0	30.257	9	4	4	4	4	3	Q8CHT0	Q8CHT0	Delta-1-pyrroline-5-carboxylate dehydrogenase, mitochondrial
Ckb	2.09363	30.3418	29.9906	28.1913	27.9539	27.3095	0	227.89	76	16	16	16	15	15	Q04447	Q04447	Creatine kinase B-type
Atp5j	2.09296	28.3563	28.2477	26.1431	26.2749	27.285	0	43.685	18	5	4	4	4	5	P97450;E9QAD6	P97450	ATP synthase-coupling factor 6, mitochondrial
Acads	2.09288	27.4041	27.2583	25.089	25.3876	24.316	0	38.078	30	10	9	10	9	10	Q07417	Q07417	Short-chain specific acyl-CoA dehydrogenase, mitochondrial
Srp19	2.09266	24.2117	24.0314	21.4907	22.5671	22.6395	0	13.413	5	2	2	2	1	2	Q9D7A6;Q9D104;G5E8T3	Q9D7A6;Q9D104;G5E8T3	Signal recognition particle 19 kDa protein
Edf1	2.09254	25.6015	25.5608	23.2305	23.7466	23.7196	0	11.266	10	3	3	3	2	3	Q9JMG1	Q9JMG1	Endothelial differentiation-related factor 1
S100a6	2.09248	27.9238	28.3929	26.0199	26.1119	27.1559	0	4.0982	10	2	2	2	2	2	P14069	P14069	Protein S100-A6
Tlr3	2.09221	25.876	24.9297	23.4532	23.168	21.3778	0	12.313	13	6	5	5	5	4	Q99MB1;A0A1B0GSY9;A0A1B0GS40	Q99MB1	Toll-like receptor 3
Dlat	2.09186	27.7968	27.4878	25.5309	25.57	23.8238	0	51.999	34	11	11	11	11	11	Q8BMF4	Q8BMF4	Dihydrolipoyllysine-residue acetyltransferase component of pyruvate dehydrogenase complex, mitochondrial
Apex1	2.09115	27.4946	27.7529	25.6666	25.3986	25.1264	0	96.67	31	10	10	10	9	9	P28352;F6QA74;D3Z124;D3Z6R9	P28352;F6QA74;D3Z124;D3Z6R9	DNA-(apurinic or apyrimidinic site) lyase;DNA-(apurinic or apyrimidinic site) lyase, mitochondrial
Uggt1	2.09107	27.7961	27.944	25.8663	25.6916	22.9283	0	82.373	39	20	18	19	19	18	Q6P5E4;G3UYG7;G3UY73;G3UZU8;G3UY35	Q6P5E4	UDP-glucose:glycoprotein glucosyltransferase 1
Lmnb1	2.09093	30.9594	31.0392	28.738	29.0788	27.1359	0	220.27	118	32	32	31	28	31	P14733	P14733	Lamin-B1
Psmc3	2.09088	22.3702	22.6655	20.3682	20.4858	19.741	0	12.426	5	1	1	1	1	1	A0A087WPH7;F6Q2E3	A0A087WPH7;F6Q2E3
Pdxk	2.08987	26.4625	26.4424	24.5845	24.1407	24.0597	0	21.316	14	3	3	3	3	3	Q8K183	Q8K183	Pyridoxal kinase
Tecr	2.08968	25.5535	24.6409	22.8068	23.2083	22.7615	0	7.3414	7	3	3	3	2	3	Q9CY27;G3UWE1;Q52L67;A0A5F8MPU6;A0A5F8MQC8;A0A1D5RLH3	Q9CY27;G3UWE1;Q52L67;A0A5F8MPU6;A0A5F8MQC8	Very-long-chain enoyl-CoA reductase
Psmb10	2.0896	27.2037	27.1713	25.1337	25.0621	24.9072	0	27.153	19	5	5	5	4	4	O35955	O35955	Proteasome subunit beta type-10
Gstm1;Gstm7;Gstm2	2.08951	26.895	27.4967	24.8056	25.4071	24.5315	0	17.356	15	6	6	6	4	5	P10649;A2AE89;F6WHQ7;D3YVP5;D3YX76;E9QAC8;P15626;D3YVP6;Q80W21;Q8R5I6;D3YZ29;A2AE91;P19639;E9PV63;G5E8M7;P48774;E9PVM7;O35660;D3YVP8;D3YVP9	P10649;A2AE89;F6WHQ7;D3YVP5;D3YX76;E9QAC8;P15626;D3YVP6;Q80W21	Glutathione S-transferase Mu 1;Glutathione S-transferase Mu 2;Glutathione S-transferase Mu 7
Hspa8	2.0884	33.1802	33.0476	31.056	30.995	29.3755	0	323.31	182	29	28	29	29	29	P63017;Q504P4;P17156;D3Z5E2	P63017;Q504P4	Heat shock cognate 71 kDa protein
Stt3a	2.08686	25.0332	24.8542	22.9009	22.8128	21.3931	0	6.1887	4	2	2	2	2	2	P46978	P46978	Dolichyl-diphosphooligosaccharide--protein glycosyltransferase subunit STT3A
Hnrnpl	2.08679	30.3904	30.1777	28.2665	28.128	27.069	0	134.47	75	21	19	17	20	19	G5E924;Q8R081;G3UY38;G3UY56;G3UYY3	G5E924;Q8R081;G3UY38	Heterogeneous nuclear ribonucleoprotein L
Timm9	2.08655	26.8276	26.4965	24.4804	24.6706	25.3904	0	16.241	13	5	5	5	5	5	Q9WV98;A0A1Y7VIZ6;A0A1Y7VL11	Q9WV98;A0A1Y7VIZ6	Mitochondrial import inner membrane translocase subunit Tim9
Supt4h1a;Supt4h1b;Supt4a	2.08628	25.0524	24.7276	22.8047	22.8028	23.6175	0.0032247	2.2012	4	2	2	2	2	2	P63271;Q9Z199;G3UVU8;D6RHM5	P63271;Q9Z199;G3UVU8;D6RHM5	Transcription elongation factor SPT4-A;Transcription elongation factor SPT4-B
Arf5	2.08582	25.2284	25.1915	23.1277	23.1205	23.0558	0	5.8447	5	2	2	2	1	1	P84084;D3YV25;E9Q2C2	P84084	ADP-ribosylation factor 5
Thy1	2.08534	27.1661	27.0073	24.9886	25.0142	25.5864	0	34.523	11	4	4	4	4	4	P01831;A0A1L1SUX8	P01831;A0A1L1SUX8	Thy-1 membrane glycoprotein
Erlin2	2.08508	27.4163	26.9665	24.9792	25.2334	24.1196	0	32.752	25	10	9	9	8	9	Q8BFZ9;A0A1B0GT70;A0A1B0GSD8;A0A1B0GQZ0;Q91X78;A0A1B0GT43;A0A1B0GRQ1	Q8BFZ9;A0A1B0GT70	Erlin-2
Tceb2	2.08488	28.0039	28.0031	25.9661	25.8711	25.9871	0	29.135	28	10	8	8	9	8	P62869;A0A3B2WBM3;A6PWE0	P62869;A0A3B2WBM3	Transcription elongation factor B polypeptide 2
Hsp90b1	2.08442	32.0937	31.6651	29.664	29.9259	27.9134	0	274.2	167	38	37	37	38	36	P08113;F7C312	P08113;F7C312	Endoplasmin
Ssbp1	2.08412	26.6604	26.4754	24.6281	24.3395	24.8772	0	41.75	19	6	6	6	6	5	Q8R2K3;Q9CYR0;D3Z3Y3	Q8R2K3;Q9CYR0	Single-stranded DNA-binding protein;Single-stranded DNA-binding protein, mitochondrial
Ermp1	2.08378	24.3344	24.2025	21.9992	22.37	20.49	0	3.1279	3	2	2	2	2	2	Q3UVK0;G8JL46;F6TQS9	Q3UVK0;G8JL46;F6TQS9	Endoplasmic reticulum metallopeptidase 1
Pdia4	2.08362	30.6769	30.3992	28.3478	28.5611	26.7205	0	205.39	86	25	25	24	25	24	P08003;A0A0R4J0Z1	P08003;A0A0R4J0Z1	Protein disulfide-isomerase A4
Tmem123	2.08334	24.3382	24.1098	22.2177	22.0636	23.5336	0.0018328	2.4454	2	1	1	1	1	1	Q91Z22	Q91Z22	Porimin
Bcap31	2.08333	26.9947	26.7402	24.7402	24.8281	24.3704	0	15.331	11	2	2	2	2	2	Q61335	Q61335	B-cell receptor-associated protein 31
Myl12b	2.08292	31.3329	31.1088	29.1996	29.0763	29.3604	0	109.22	66	8	8	8	8	8	Q3THE2;D3Z249	Q3THE2	Myosin regulatory light chain 12B
Ddx58	2.08257	23.6403	23.5171	21.5949	21.3974	19.46	0.0035486	2.1187	2	1	1	1	1	1	Q6Q899;A2AP29	Q6Q899;A2AP29	Probable ATP-dependent RNA helicase DDX58
Ddx5	2.08217	32.2559	31.7574	30.0007	29.8482	28.3302	0	153.99	130	28	28	28	28	28	Q61656;Q8BTS0;S4R1I6;B1ARB9;B1ARC0;S4R1E3	Q61656;Q8BTS0;S4R1I6	Probable ATP-dependent RNA helicase DDX5
Ndufs3	2.08201	27.2061	26.5929	24.8003	24.8347	24.2316	0	24.906	14	5	5	5	5	5	Q9DCT2	Q9DCT2	NADH dehydrogenase [ubiquinone] iron-sulfur protein 3, mitochondrial
Hnrnpa3	2.08176	31.6662	31.7235	29.4783	29.7478	28.7543	0	160.84	96	20	20	20	18	20	Q8BG05;A2AL12;A2AL13;V9GX38	Q8BG05;A2AL12	Heterogeneous nuclear ribonucleoprotein A3
Snx8	2.08175	22.1856	21.4118	19.7343	19.6996	18.6227	0	3.1735	1	1	1	1	1	1	Q8CFD4;Q3U0I9	Q8CFD4;Q3U0I9	Sorting nexin-8
Snap23	2.08066	28.0022	27.5472	25.6439	25.7443	25.5105	0	121.85	32	9	9	9	9	9	O09044;Q9D3L3;B0R030;B0R029;E9Q8A1;P60879	O09044;Q9D3L3;B0R030	Synaptosomal-associated protein 23;Synaptosomal-associated protein
Ufc1	2.08057	25.2817	25.131	23.1597	23.0918	23.5141	0	4.2816	6	2	2	2	2	2	Q9CR09;M0QWS4	Q9CR09;M0QWS4	Ubiquitin-fold modifier-conjugating enzyme 1
Ech1	2.08048	24.1312	23.9444	22.0491	21.8655	21.0251	0	9.9218	5	2	2	2	1	2	O35459;F7B227	O35459;F7B227	Delta(3,5)-Delta(2,4)-dienoyl-CoA isomerase, mitochondrial
Fadd	2.08016	22.2631	23.2055	20.686	20.6222	20.9321	0	4.4175	4	1	1	1	1	1	Q61160	Q61160	FAS-associated death domain protein
Rpn1	2.07999	29.3608	28.9734	26.9922	27.1821	25.275	0	73.494	52	18	18	18	15	16	Q91YQ5;A0A0N4SUJ8	Q91YQ5	Dolichyl-diphosphooligosaccharide--protein glycosyltransferase subunit 1
Rpl17	2.07995	29.681	29.3465	27.464	27.4037	27.658	0	39.507	22	7	7	7	6	6	Q9CPR4;Q6ZWZ7;B2RY53	Q9CPR4;Q6ZWZ7	60S ribosomal protein L17
Top1	2.07983	28.7728	28.4803	26.4802	26.6132	24.6912	0	56.003	47	20	19	19	17	16	Q04750;Q8R4U6	Q04750	DNA topoisomerase 1
Psmd1	2.07983	26.5779	26.455	24.6001	24.2731	22.271	0	16.389	14	7	7	7	7	7	Q3TXS7;J3QN38	Q3TXS7	26S proteasome non-ATPase regulatory subunit 1
Gnb2l1	2.07951	29.1037	29.006	27.0107	26.94	26.0401	0	82.056	50	14	14	13	13	13	P68040	P68040	Guanine nucleotide-binding protein subunit beta-2-like 1;Guanine nucleotide-binding protein subunit beta-2-like 1, N-terminally processed
Myh14	2.07871	27.5865	27.3002	25.3287	25.4006	22.0552	0	4.1986	6	2	2	2	2	2	Q6URW6;K3W4R2;A0A140LI60	Q6URW6;K3W4R2	Myosin-14
Chchd2;Zbed5	2.07824	26.6176	26.3882	24.3748	24.4746	25.4915	0	15.045	9	3	3	3	3	3	Q9D1L0;B2RPU8;D3Z5B1	Q9D1L0;B2RPU8;D3Z5B1	Coiled-coil-helix-coiled-coil-helix domain-containing protein 2
Smc1a	2.07762	26.8275	26.9494	24.7654	24.8562	22.0264	0	27.832	21	12	11	11	11	11	Q9CU62	Q9CU62	Structural maintenance of chromosomes protein 1A
Actn4	2.07727	30.2741	30.0744	28.1636	28.0304	25.7028	0	247.97	87	30	30	29	27	24	P57780;A0A1L1SV25;E9Q2W9;A0A1L1SVJ6;D3Z0L8;D3Z761;Q91ZE6;E9PX29	P57780;A0A1L1SV25;E9Q2W9	Alpha-actinin-4
Cbfb	2.07723	26.441	26.3618	24.3629	24.2855	24.7087	0	35.014	6	5	5	5	5	5	Q08024	Q08024	Core-binding factor subunit beta
Epb4.1l3;Epb41l3	2.07622	27.3933	26.9257	24.9935	25.1731	23.0229	0	59.626	16	9	9	9	7	8	A0A3B2WBE1;A7YY80;Q9WV92;A0A3B2WD96;D0VYV6;A0A5F8MPR1;A0A5F8MPE1;A0A286YD84;A0A286YDY4;A0A286YCT6;A0A286YCY1;A0A286YCY8;A0A286YDD0;A0A286YD94	A0A3B2WBE1;A7YY80;Q9WV92;A0A3B2WD96;D0VYV6;A0A5F8MPR1;A0A5F8MPE1;A0A286YD84;A0A286YDY4	Band 4.1-like protein 3;Band 4.1-like protein 3, N-terminally processed
Serpine2	2.07596	28.5967	27.6516	26.3049	25.7914	25.1048	0	44.507	46	14	14	14	13	13	Q07235;A0A087WQ70;A0A087WQM1;A2RSF9	Q07235;A0A087WQ70;A0A087WQM1	Glia-derived nexin
Ube2v1;Gm20431;Ube2v2	2.07588	26.9668	26.7106	24.8492	24.6763	24.8289	0	28.658	7	5	4	3	3	2	Q9CZY3;B7ZBY7;E9PY39;Q9D2M8;B7ZBY6;A6X925;B2KF55	Q9CZY3;B7ZBY7;E9PY39;Q9D2M8;B7ZBY6	Ubiquitin-conjugating enzyme E2 variant 1;Ubiquitin-conjugating enzyme E2 variant 2
Capn1	2.07545	27.8954	27.6651	25.6801	25.7296	23.7337	0	51.123	36	14	14	13	11	13	O35350;A0A494BAC4;A0A494BAS0	O35350	Calpain-1 catalytic subunit
Srrt	2.07535	28.747	28.328	26.3247	26.5995	24.3987	0	65.586	42	16	15	15	11	12	Q99MR6;A0A0G2JDF8;A0A0G2JG65;A0A0G2JDN3;A0A1Y7VNN4;A0A0G2JDF1	Q99MR6;A0A0G2JDF8	Serrate RNA effector molecule homolog
Chordc1	2.07496	26.3344	26.2345	24.1911	24.2279	23.6855	0	23.244	15	6	6	6	6	6	Q9D1P4;A0A1L1STZ1;A0A1L1SU22;A0A1L1STQ1;A0A1L1SSG7	Q9D1P4;A0A1L1STZ1;A0A1L1SU22;A0A1L1STQ1;A0A1L1SSG7	Cysteine and histidine-rich domain-containing protein 1
Ddx21	2.07495	29.8345	29.3889	27.6144	27.4592	25.3185	0	153.05	86	27	27	27	26	24	Q9JIK5	Q9JIK5	Nucleolar RNA helicase 2
Rab3gap2	2.07492	23.9474	23.7701	21.7124	21.8553	19.2617	0	3.201	1	2	2	2	2	2	Q8BMG7;E9QKE4;A0A0A6YWM5	Q8BMG7;E9QKE4;A0A0A6YWM5	Rab3 GTPase-activating protein non-catalytic subunit
Smarcd2;Smarcd3;Smarcd1	2.07458	24.1182	23.9635	21.8788	22.0538	20.3504	0	6.6523	3	2	2	2	2	2	Q99JR8;Q6P9Z1;Q61466;A0A2R8VHB7;A0A2R8VI28;A0A2R8VI06;G3UXC0;A0A0G2JG60;A0A2R8VKP3	Q99JR8;Q6P9Z1;Q61466;A0A2R8VHB7;A0A2R8VI28;A0A2R8VI06;G3UXC0;A0A0G2JG60;A0A2R8VKP3	SWI/SNF-related matrix-associated actin-dependent regulator of chromatin subfamily D member 2;SWI/SNF-related matrix-associated actin-dependent regulator of chromatin subfamily D member 3;SWI/SNF-related matrix-associated actin-dependent regulator of chromatin subfamily D member 1
Nmt1	2.07447	26.5608	26.3511	24.3817	24.3813	23.3741	0	21.67	18	7	6	6	5	6	O70310;O70311;F7APP3;A2AJH3	O70310	Glycylpeptide N-tetradecanoyltransferase 1
Dpf2	2.07358	24.1585	24.2055	22.0623	22.1545	21.0303	0	15.809	7	3	3	3	3	3	Q61103;D3Z5N6;F8WIP7;A0A494BBF7	Q61103;D3Z5N6;F8WIP7;A0A494BBF7	Zinc finger protein ubi-d4
Mlec	2.07343	26.8415	26.5397	24.5876	24.6467	24.0045	0	20.808	14	6	6	6	6	5	Q6ZQI3	Q6ZQI3	Malectin
Yes1;Src;Fyn	2.07325	25.7719	25.6206	23.5937	23.6523	22.3616	0	5.5678	8	2	2	1	1	1	Q04736;P05480;P39688;D3YZ57;P06240;E9Q696	Q04736;P05480;P39688;D3YZ57	Tyrosine-protein kinase Yes;Neuronal proto-oncogene tyrosine-protein kinase Src;Tyrosine-protein kinase Fyn;Non-specific protein-tyrosine kinase
Ahnak	2.07281	28.266	29.1813	26.7367	26.565	21.582	0	87.736	51	25	19	24	17	14	E9Q616;A0A494BBD5;G5E8K8;A0A494B8Y7	E9Q616
Rpl31	2.07278	29.242	28.8887	27.1561	26.8289	27.5761	0	17.855	21	5	5	5	5	4	P62900;A0A0A6YX26;A0A0A6YXL3	P62900;A0A0A6YX26;A0A0A6YXL3	60S ribosomal protein L31
Dhx15	2.07269	27.0448	27.1495	24.9827	25.0662	23.1203	0	21.513	25	10	10	10	10	8	O35286;A0A0G2JG10;Q497W9;A0A0G2JGQ5	O35286;A0A0G2JG10;Q497W9	Pre-mRNA-splicing factor ATP-dependent RNA helicase DHX15
Yy1;Zfp42;Yy2	2.0722	23.1793	23.2252	21.0387	21.2214	20.4233	0.0025372	2.3159	4	1	1	1	1	1	Q00899;P22227;Q3TTC2;E9QK22	Q00899;P22227;Q3TTC2;E9QK22	Transcriptional repressor protein YY1;Zinc finger protein 42;Transcription factor YY2
Fam63a	2.07188	23.5279	23.1708	21.2882	21.2668	20.8588	0	6.6732	1	1	1	1	1	1	Q76LS9	Q76LS9	Protein FAM63A
Dkc1	2.07176	27.837	27.5255	25.5164	25.7026	24.0896	0	64.843	34	10	10	10	8	10	Q9ESX5;B7ZCL7;F6YUI5;A2AN81;F6S1S5	Q9ESX5;B7ZCL7	H/ACA ribonucleoprotein complex subunit 4
Stx7	2.0716	29.1801	28.669	26.8326	26.8734	26.6657	0	65.758	25	10	10	10	8	10	O70439;Q8BH40	O70439;Q8BH40	Syntaxin-7
Vps26a	2.07145	25.6856	25.4805	23.6004	23.4228	22.6465	0	8.4172	6	3	3	3	3	3	P40336;Q8C0E2;A0A1W2P7Z9	P40336	Vacuolar protein sorting-associated protein 26A
Gspt1	2.07105	26.9963	26.7287	24.8577	24.7252	23.3684	0	23.59	18	8	8	8	7	7	Q8R050;Q149F3	Q8R050	Eukaryotic peptide chain release factor GTP-binding subunit ERF3A
P2rx4	2.07072	29.3632	28.3528	27.0118	26.5627	25.8474	0	57.453	30	9	8	8	8	8	D3Z5U5;Q9Z257;Q9JJX6;D3YYR5;Q9Z256;A0A0G2JEP2	D3Z5U5;Q9Z257;Q9JJX6;D3YYR5;Q9Z256	P2X purinoceptor;P2X purinoceptor 4
Arl3	2.07023	22.747	23.5711	20.7595	21.4182	21.0619	0	6.016	2	2	1	2	1	2	Q9WUL7;A0A494BAJ6	Q9WUL7;A0A494BAJ6	ADP-ribosylation factor-like protein 3
Dynll2	2.06965	27.203	27.1501	25.1218	25.092	26.1631	0	12.05	15	4	4	4	4	4	Q9D0M5;D6RIN4	Q9D0M5;D6RIN4	Dynein light chain 2, cytoplasmic
Eif2s2	2.06955	28.4702	28.3886	26.4683	26.2515	25.417	0	72.56	33	13	11	13	11	10	Q99L45;E0CXJ3	Q99L45	Eukaryotic translation initiation factor 2 subunit 2
Rpn2	2.06931	28.1785	27.6181	25.7589	25.8991	24.7052	0	87.632	36	11	11	11	11	11	Q9DBG6;A2ACG7	Q9DBG6;A2ACG7	Dolichyl-diphosphooligosaccharide--protein glycosyltransferase subunit 2
Acox3	2.06926	22.9582	22.7098	20.811	20.7185	18.7892	0	5.3102	2	2	2	2	2	2	Q9EPL9;Q3TAW3;E9Q296;Q8C178;D3Z2N6;A0A0J9YVH1	Q9EPL9;Q3TAW3;E9Q296;Q8C178;D3Z2N6;A0A0J9YVH1	Peroxisomal acyl-coenzyme A oxidase 3;Acyl-coenzyme A oxidase
Nxf1	2.06882	26.6642	25.7146	24.1083	24.1329	22.5602	0	26.227	19	9	8	6	5	6	Q99JX7;V9GXW3;V9GXF3;V9GXM5	Q99JX7	Nuclear RNA export factor 1
Dnm2	2.06791	28.8171	28.6722	26.7677	26.5858	24.4704	0	90.283	66	21	20	20	19	20	P39054;Q3T9X3;Q3TCR7;G3X9G4;F8WIV5;G3UZZ3;G3UXX2;G3UY64;D6RH60;F2Z460;E0CXZ8	P39054;Q3T9X3;Q3TCR7;G3X9G4;F8WIV5;G3UZZ3	Dynamin-2
Spata5;Katnal2	2.06738	25.9204	25.8052	23.8554	23.7355	21.4448	0.00037951	2.8076	3	1	1	1	1	1	Q3UMC0;Q9D3R6;D3Z0U5;D6RGM7;D3Z4J2;A0A0G2JFY0;A0A0A0MQ80	Q3UMC0;Q9D3R6;D3Z0U5;D6RGM7;D3Z4J2;A0A0G2JFY0;A0A0A0MQ80	Spermatogenesis-associated protein 5;Katanin p60 ATPase-containing subunit A-like 2
Pax5;Pax2	2.06707	24.9787	24.4789	22.9541	22.3694	22.1537	0	4.0193	1	2	2	2	2	2	Q02650;P32114;A0A0R4J267;A2AKM6;A2AKM5;A2AKM7;G3UW65;G3V008;V9GXS5;A2AKM8;G3UZ86;G3UZ20;G3UZ71;G3X8Q7;G3UX39;G3UYK4;G3UXF6;G3UY80;A0A087WST9	Q02650;P32114;A0A0R4J267;A2AKM6;A2AKM5;A2AKM7;G3UW65;G3V008;V9GXS5;A2AKM8;G3UZ86;G3UZ20;G3UZ71;G3X8Q7;G3UX39;G3UYK4;G3UXF6;G3UY80;A0A087WST9	Paired box protein Pax-5;Paired box protein Pax-2
Tollip	2.06646	24.1517	24.2706	22.1624	22.1271	21.9361	0	8.2768	5	2	2	2	2	2	Q9QZ06;A9JEI5;Q8C5G6;F7AT44	Q9QZ06;A9JEI5;Q8C5G6;F7AT44	Toll-interacting protein
Psma7	2.06496	29.0613	28.9535	26.9593	26.9256	26.51	0	77.984	48	13	12	13	10	11	Q9Z2U0;A0A338P7D7;Q9CWH6;B7ZMS4;A0A3Q4L361;A0A3Q4EHS3;A0A3Q4EG42	Q9Z2U0;A0A338P7D7	Proteasome subunit alpha type-7
Psmd11	2.06392	27.1382	27.1521	25.1985	24.9639	23.7006	0	30.416	24	11	8	10	10	9	Q8BG32;G3UYI4;G3UYL3;G3UYL8;G3UX15;G3UYH2;G3UX67;G3UWV7;G3UWW7;G3UXL5;G3UZ28;G3UZ33	Q8BG32;G3UYI4;G3UYL3	26S proteasome non-ATPase regulatory subunit 11
Qki	2.0635	24.1997	24.3853	22.0116	22.4464	21.8002	0	6.4621	3	3	3	3	3	3	Q9QYS9;A0A3B2WCH2	Q9QYS9;A0A3B2WCH2	Protein quaking
Sbno1	2.06339	22.2006	21.9638	19.9545	20.0832	17.3735	0.00038095	2.8381	1	1	1	1	1	1	Q689Z5;B2RRI2;F7CVW0	Q689Z5;B2RRI2;F7CVW0	Protein strawberry notch homolog 1
Etfa	2.06334	29.1454	28.6309	26.8778	26.7718	25.8943	0	52.45	43	10	10	9	10	10	Q99LC5	Q99LC5	Electron transfer flavoprotein subunit alpha, mitochondrial
Prcp	2.06275	27.1743	26.5205	25.2106	24.3587	23.8767	0	19.933	13	6	5	5	6	4	Q7TMR0;A0A140LHY2	Q7TMR0;A0A140LHY2	Lysosomal Pro-X carboxypeptidase
Fdps	2.0613	24.3901	24.5314	22.39	22.4089	21.6021	0	10.593	7	3	3	3	3	3	Q920E5;A0A0G2JEA5;A0A0G2JDJ5;A0A0G2JEB3	Q920E5;A0A0G2JEA5;A0A0G2JDJ5;A0A0G2JEB3	Farnesyl pyrophosphate synthase
Bank1	2.06106	23.8243	23.9376	21.8562	21.7835	19.8343	0	6.1336	2	2	2	2	2	2	Q80VH0;A0A0G2JF26;B0F3S4	Q80VH0;A0A0G2JF26;B0F3S4	B-cell scaffold protein with ankyrin repeats
Dbnl	2.06084	29.3449	29.3316	27.2983	27.2565	26.2559	0	155	65	14	14	14	14	14	Q62418	Q62418	Drebrin-like protein
Hdac2	2.06012	23.5815	23.5681	21.3828	21.6466	20.5642	0.0032235	2.2011	2	1	1	1	1	1	P70288;Q8BQ10;A0A0R4J008	P70288;Q8BQ10;A0A0R4J008	Histone deacetylase 2
Supt16h;Supt16	2.05989	27.9306	27.6601	25.6181	25.8529	23.3566	0	59.516	28	12	12	11	10	11	Q920B9;G3X956	Q920B9;G3X956	FACT complex subunit SPT16
Gng2	2.05958	26.8779	26.5294	24.8749	24.4133	26.0259	0	20.854	12	3	3	3	3	3	P63213	P63213	Guanine nucleotide-binding protein G(I)/G(S)/G(O) subunit gamma-2
Cyc1	2.05906	28.7977	28.1591	26.3995	26.4392	26.0097	0	50.887	29	8	8	7	8	8	Q9D0M3;A0A2R8VHK1	Q9D0M3;A0A2R8VHK1	Cytochrome c1, heme protein, mitochondrial
Serpinb9c;Serpinb9b	2.05904	23.3543	23.3506	21.56	21.0268	20.6675	0	3.228	4	1	1	1	1	1	Q9D6A7;Q9DAV6;I7HJI5	Q9D6A7;Q9DAV6;I7HJI5
Npc2	2.05851	29.5653	28.4445	27.2488	26.644	27.6	0	23.778	19	6	6	6	5	4	Q9Z0J0	Q9Z0J0	Epididymal secretory protein E1
Aco1	2.05817	26.0331	25.7389	23.655	24.0007	21.8122	0	36.19	20	8	7	8	7	8	P28271	P28271	Cytoplasmic aconitate hydratase
Nono	2.05798	29.0087	28.771	26.7943	26.8694	25.812	0	156.61	58	17	15	17	15	14	Q99K48;B1AXT0	Q99K48	Non-POU domain-containing octamer-binding protein
Phb2	2.0579	29.3466	28.8496	26.7195	27.3609	25.9732	0	49.606	51	14	14	13	12	14	O35129;F6QPR1;F6Q8V7	O35129;F6QPR1	Prohibitin-2
Baz1a	2.05772	21.8817	21.7904	19.7273	19.8293	17.1251	0.0055633	1.9125	2	1	1	1	1	1	O88379;G3UWZ0	O88379;G3UWZ0	Bromodomain adjacent to zinc finger domain protein 1A
Mycbp	2.05727	24.0212	23.7278	21.9952	21.6392	22.3859	0	6.5063	6	2	2	2	1	1	Q9EQS3;A2A7K5	Q9EQS3;A2A7K5	C-Myc-binding protein
Chmp4b	2.05712	27.8471	27.79	25.8902	25.6328	25.3233	0	50.369	24	6	6	6	6	6	Q9D8B3	Q9D8B3	Charged multivesicular body protein 4b
Nat10	2.05605	24.3243	24.0657	22.1877	22.0902	19.7558	0	7.1284	7	4	4	4	4	4	Q8K224	Q8K224	N-acetyltransferase 10
Dars	2.05602	28.7777	28.4959	26.6983	26.4633	24.7843	0	70.398	40	19	17	16	17	17	Q922B2;Q8BJY7	Q922B2	Aspartate--tRNA ligase, cytoplasmic
Sdha	2.0558	29.3025	29.1926	27.1694	27.2141	25.515	0	126	62	18	17	18	15	16	Q8K2B3;A0A1Y7VJ55	Q8K2B3	Succinate dehydrogenase [ubiquinone] flavoprotein subunit, mitochondrial
Nop58	2.0553	28.6589	28.3543	26.5728	26.3298	25.3016	0	74.957	26	14	13	13	14	13	Q6DFW4;A0A0A0MQ76;A0A087WQ46;A0A087WSL8;A0A087WSU5;A0A087WP00;A0A087WNW0	Q6DFW4;A0A0A0MQ76;A0A087WQ46	Nucleolar protein 58
Rela	2.05499	24.3068	23.9387	22.1387	21.9968	21.0513	0	6.9652	1	2	2	2	2	2	Q04207;A0A494BA44	Q04207;A0A494BA44	Transcription factor p65
Serbp1	2.05474	28.9188	28.4484	26.7667	26.491	25.8415	0	40.565	41	13	13	12	13	13	Q9CY58;A0A0N4SV32;Q3UMP4;A0A0N4SWH2;A0A0N4SUQ1;A0A0N4SUN8;A0A0N4SV40;A0A0N4SVK5	Q9CY58;A0A0N4SV32;Q3UMP4;A0A0N4SWH2;A0A0N4SUQ1;A0A0N4SUN8	Plasminogen activator inhibitor 1 RNA-binding protein
Smarca5	2.05454	27.7928	27.573	25.5649	25.6919	23.2164	0	39.657	31	12	12	12	11	12	Q91ZW3;Q6PGB8	Q91ZW3	SWI/SNF-related matrix-associated actin-dependent regulator of chromatin subfamily A member 5
Tor3a	2.05421	21.7258	21.9178	19.6799	19.8552	18.9662	0	7.2541	1	2	2	2	2	2	Q9ER38	Q9ER38	Torsin-3A
S100a10	2.05398	25.2768	25.399	23.364	23.2038	24.6506	0	3.3825	3	2	2	2	2	2	P08207	P08207	Protein S100-A10
Actr1b	2.05334	25.3479	25.4337	23.5329	23.142	22.4573	0	19.909	9	3	3	3	3	3	Q8R5C5;E0CZD4;E0CYB4	Q8R5C5;E0CZD4;E0CYB4	Beta-centractin
Dhrs1	2.05325	27.7136	27.4379	25.4184	25.6265	24.6453	0	24.422	21	10	10	10	7	9	Q99L04	Q99L04	Dehydrogenase/reductase SDR family member 1
Cdk6	2.05296	21.1469	21.5519	19.5737	19.0192	18.4296	0	3.2271	1	1	1	1	1	1	Q64261	Q64261	Cyclin-dependent kinase 6
Mob1a;Mob1b	2.05278	26.7636	26.6309	24.7667	24.5222	24.6891	0	15.796	14	5	5	5	5	4	Q921Y0;Q8BPB0;Q3UDM0	Q921Y0;Q8BPB0;Q3UDM0	MOB kinase activator 1A;MOB kinase activator 1B
Ddx52	2.0526	23.3834	22.8955	21.3389	20.8348	19.5649	0	10.763	5	2	2	2	2	1	Q8K301	Q8K301	Probable ATP-dependent RNA helicase DDX52
Prpf19	2.05206	27.6485	27.3921	25.5147	25.4218	24.5888	0	60.828	24	10	10	9	10	10	Q99KP6	Q99KP6	Pre-mRNA-processing factor 19
Glrx3	2.05155	26.3699	26.1744	24.1712	24.2701	23.4169	0	15.113	10	6	5	5	5	6	Q9CQM9;A0A1B0GS58;A0A1B0GT04	Q9CQM9;A0A1B0GS58;A0A1B0GT04	Glutaredoxin-3
Lrrc47	2.05091	28.5494	28.0283	26.2135	26.2624	24.6655	0	66.369	51	18	18	17	17	17	Q505F5;E9PV22;F6Z4L9;F6YT33	Q505F5;E9PV22	Leucine-rich repeat-containing protein 47
Iws1	2.05067	24.7457	24.1015	22.573	22.1728	20.5971	0	7.3878	4	3	3	3	3	2	Q8C1D8;A0A1D5RLV0;A0A1D5RMB4	Q8C1D8;A0A1D5RLV0;A0A1D5RMB4	Protein IWS1 homolog
Evl	2.05052	29.1957	28.9354	27.2338	26.7962	25.9931	0	91.132	44	13	13	13	13	12	P70429;F8WJB9;E9PVP4;A0A1Y7VJA2;A0A1Y7VNI5	P70429;F8WJB9;E9PVP4;A0A1Y7VJA2	Ena/VASP-like protein
Hnrnpd	2.04976	29.806	29.8295	27.8514	27.6845	27.4299	0	52.506	51	11	11	11	11	10	Q60668;F6ZV59;G5E8G0;G3X9W0;E9Q5B6;F6SHF3;A0A0G2JFL4;Q9D3U4	Q60668;F6ZV59;G5E8G0;G3X9W0;E9Q5B6	Heterogeneous nuclear ribonucleoprotein D0
Uba5	2.04876	24.5432	22.8058	22.8616	20.3897	21.1937	0	11.498	3	2	2	1	2	1	Q8VE47	Q8VE47	Ubiquitin-like modifier-activating enzyme 5
Atp6v1b2	2.0468	30.7106	29.9506	28.4409	28.1267	27.041	0	172.77	116	26	26	24	26	24	P62814;Q91YH6;A0A0U1RNU9	P62814	V-type proton ATPase subunit B, brain isoform
Rap1a	2.04666	30.6998	30.3524	28.612	28.3468	28.5265	0	98.676	59	13	13	12	13	12	P62835;A0A0G2JE52;A0A0G2JED9	P62835;A0A0G2JE52;A0A0G2JED9	Ras-related protein Rap-1A
Psma5	2.04611	29.0029	28.788	26.9254	26.7733	26.7524	0	66.267	32	11	11	10	11	10	Q9Z2U1;A0A0G2JF97	Q9Z2U1	Proteasome subunit alpha type-5
Tsg101	2.04608	25.2967	25.2308	23.3756	23.0598	22.3307	0	13.889	11	4	4	4	4	4	Q61187;A0A1B0GS09;A0A1B0GRX2;D3Z0S9;A0A1B0GS10	Q61187;A0A1B0GS09	Tumor susceptibility gene 101 protein
Prkaa1	2.04598	24.4047	24.1166	22.3336	22.0958	20.7729	0	3.5335	3	2	2	2	2	2	Q5EG47;Q3TUQ7	Q5EG47;Q3TUQ7	5-AMP-activated protein kinase catalytic subunit alpha-1
Fkbp2	2.04563	26.8724	26.6831	24.739	24.7253	25.2859	0	31.321	13	4	4	4	4	4	P45878	P45878	Peptidyl-prolyl cis-trans isomerase FKBP2
Cpsf6	2.0455	28.4073	27.7987	26.1528	25.9622	25.2723	0	59.898	23	7	7	7	7	7	Q6NVF9;H3BJ30;H3BJW3;H3BKW0;H3BLM9	Q6NVF9;H3BJ30;H3BJW3	Cleavage and polyadenylation specificity factor subunit 6
Emr4	2.0454	22.8337	23.1472	20.9178	20.9722	19.6664	0	7.1358	4	1	1	1	1	1	Q91ZE5	Q91ZE5	EGF-like module-containing mucin-like hormone receptor-like 4
Fam107b	2.04471	27.0747	27.4067	25.0949	25.297	25.5621	0	30.464	16	5	5	5	5	5	Q3TGF2;H9H9T1;A0A2I3BR29;H3BLM7;H3BLE6	Q3TGF2;H9H9T1;A0A2I3BR29	Protein FAM107B
Ran;1700009N14Rik;Rasl2-9	2.04428	29.408	29.4863	27.3421	27.4637	27.3016	0	22.476	22	8	7	7	7	7	P62827;Q14AA6;Q61820	P62827;Q14AA6;Q61820	GTP-binding nuclear protein Ran;GTP-binding nuclear protein Ran, testis-specific isoform
Ppp2r2a	2.04428	25.9326	25.9783	23.9512	23.8712	22.6839	0	25.642	8	4	4	4	4	4	Q6P1F6;Q9CWU3;Q6ZWR4;A0A494B941;G3UXS9;A0A494B8Z0;A0A668KLA9;Q925E7	Q6P1F6;Q9CWU3	Serine/threonine-protein phosphatase 2A 55 kDa regulatory subunit B alpha isoform;Serine/threonine-protein phosphatase 2A 55 kDa regulatory subunit B
Mrps12	2.04331	22.9729	22.5625	20.8566	20.5922	21.2866	0.0032143	2.1818	1	1	1	1	1	1	O35680;E9PUY1	O35680;E9PUY1	28S ribosomal protein S12, mitochondrial
Fnbp1	2.04327	28.2562	28.1044	26.2289	26.0452	24.6885	0	66.421	50	16	15	15	16	15	Q80TY0;A2AQ43;A2AQ44;A2AQ42;A2AQ45;A2AQ41;F6VVN1;A0A0A6YWT1;A2AQ39;A2AQ47	Q80TY0;A2AQ43;A2AQ44;A2AQ42;A2AQ45;A2AQ41;F6VVN1;A0A0A6YWT1	Formin-binding protein 1
Zc3h15	2.04289	24.9853	24.2112	22.3134	22.7974	21.372	0	16.456	6	2	2	2	1	2	Q3TIV5	Q3TIV5	Zinc finger CCCH domain-containing protein 15
Dnmt1	2.0427	27.0604	26.1497	24.7136	24.4112	21.5678	0	18.29	11	11	10	8	9	7	P13864;J3QNW0	P13864;J3QNW0	DNA (cytosine-5)-methyltransferase 1;DNA (cytosine-5)-methyltransferase
Txndc5	2.04261	28.6674	28.2063	26.0021	26.7863	25.4535	0	82.646	45	11	11	9	10	11	Q91W90;E9PXX7;A0A0R4J1Y7	Q91W90;E9PXX7;A0A0R4J1Y7	Thioredoxin domain-containing protein 5
Itga4	2.04257	23.5685	23.4541	21.5795	21.3579	19.3671	0	4.2322	4	2	2	2	2	2	Q00651;Q792F9	Q00651;Q792F9	Integrin alpha-4
Pnp	2.04228	27.5621	27.5846	25.6421	25.4201	24.8878	0	55.798	33	9	9	9	9	8	P23492;Q543K9;Q9D8C9;A0A2I3BQH2;A0A2I3BS22	P23492;Q543K9	Purine nucleoside phosphorylase
Erh	2.04222	28.1422	28.1055	26.0735	26.0898	27.1157	0	50.914	11	3	3	3	3	3	P84089;A0A1W2P7H9;A0A1W2P7T3;G3UW85	P84089;A0A1W2P7H9;A0A1W2P7T3;G3UW85	Enhancer of rudimentary homolog
Nhp2l1	2.04203	29.3283	29.0683	27.1916	27.121	27.5168	0	30.516	30	8	8	8	8	8	Q9D0T1	Q9D0T1	NHP2-like protein 1;NHP2-like protein 1, N-terminally processed
Arl8b	2.04107	29.484	28.7341	27.1125	27.0236	27.0025	0	57.325	34	9	9	8	8	8	Q9CQW2;A0A0N4SVB8	Q9CQW2;A0A0N4SVB8	ADP-ribosylation factor-like protein 8B
Ddi2	2.04107	26.2614	26.4193	24.3717	24.2268	23.2638	0	32.646	14	7	6	7	7	7	A2ADY9	A2ADY9	Protein DDI1 homolog 2
Ptrf	2.04094	26.3854	25.8695	24.1239	24.0492	23.29	0	46.576	16	6	6	6	6	6	O54724	O54724	Polymerase I and transcript release factor
Stmn1	2.04081	27.0924	27.1227	24.9718	25.1617	25.2522	0	6.3852	11	4	3	3	3	3	P54227;D3Z1Z8;D3Z5N2	P54227;D3Z1Z8;D3Z5N2	Stathmin
Ppp1r9b	2.04065	25.3911	25.6713	23.5272	23.4539	21.9437	0	14.47	8	6	5	6	6	5	Q6R891;Q7TN74;H3BJA6;Q3UXW4;H3BKQ7;H3BJD0;H3BL28;H3BJD6	Q6R891	Neurabin-2
Pck2	2.04061	27.4856	27.1138	25.4395	25.0787	23.4961	0	59.811	29	13	13	11	12	10	Q8BH04;A0A2I3BQL9;A0A0R4J0G0;A0A2I3BS39;A0A2I3BRX1;A0A2I3BQC6;A0A2I3BQ75	Q8BH04;A0A2I3BQL9;A0A0R4J0G0;A0A2I3BS39;A0A2I3BRX1	Phosphoenolpyruvate carboxykinase [GTP], mitochondrial
Gstp1;Gstp2	2.04042	28.8376	28.3667	26.6241	26.4994	26.3468	0	64.371	33	10	9	10	9	9	P19157;A0A494BAW2;A0A494B908;P46425;A0A494BAS3;A0A494BAU3;A0A494BAM8;Q8VC73;F6RWR5	P19157;A0A494BAW2;A0A494B908;P46425	Glutathione S-transferase P 1;Glutathione S-transferase P 2
Ndufs4	2.04034	26.421	26.4901	24.2988	24.5316	24.3113	0	6.0922	7	3	2	3	3	3	Q9CXZ1;E9QPX3;A0A338P7A0	Q9CXZ1;E9QPX3	NADH dehydrogenase [ubiquinone] iron-sulfur protein 4, mitochondrial
Chmp1b1;Chmp1b2	2.04016	24.66	24.8998	22.9986	22.4808	23.1024	0	4.3601	8	2	2	2	2	1	Q99LU0;Q9CQD4	Q99LU0;Q9CQD4	Charged multivesicular body protein 1b-1;Charged multivesicular body protein 1b-2
Fcer1g	2.03961	27.6988	27.3875	25.4706	25.5364	27.864	0	13.541	12	3	3	3	3	3	P20491	P20491	High affinity immunoglobulin epsilon receptor subunit gamma
Sumo2;Sumo3	2.0394	27.631	28.0028	25.857	25.698	28.1411	0	6.6252	4	1	1	1	1	1	P61957;Q9Z172;G3UZX6;H7BWX9;D3Z794;G3UZ60;G3UWI9;G3UWX9;G3UZA7	P61957;Q9Z172;G3UZX6;H7BWX9;D3Z794;G3UZ60;G3UWI9;G3UWX9;G3UZA7	Small ubiquitin-related modifier 2;Small ubiquitin-related modifier 3;Small ubiquitin-related modifier
Prps1l1	2.03919	25.4619	25.3118	23.4408	23.2545	22.7963	0	3.1808	4	1	1	1	1	1	Q8C5R8	Q8C5R8
Nck1	2.03911	23.0066	23.1012	21.2503	20.7792	19.9801	0.00038037	2.8227	1	1	1	1	1	1	Q99M51;Q8BH99	Q99M51;Q8BH99	Cytoplasmic protein NCK1
Gimap7	2.03896	21.5835	21.7615	19.5896	19.6775	20.6671	0	4.4203	4	1	1	1	1	1	A0A0N4SVT7;Q8R379	A0A0N4SVT7;Q8R379
Pycard	2.03836	27.7819	27.6726	25.6034	25.7743	25.4579	0	78.749	32	9	9	9	9	9	Q9EPB4;A0A0U1RQ20	Q9EPB4;A0A0U1RQ20	Apoptosis-associated speck-like protein containing a CARD
Pdcd10	2.03816	25.7058	25.5422	23.8253	23.3464	23.2437	0	10.105	5	2	2	2	2	2	Q8VE70;E0CY82;F8WI55	Q8VE70;E0CY82;F8WI55	Programmed cell death protein 10
Atp6ap1	2.03768	22.0747	21.2924	19.7089	19.5829	19.2332	0	3.5171	1	1	1	1	1	1	Q9R1Q9	Q9R1Q9	V-type proton ATPase subunit S1
Hsd17b10	2.03737	27.8401	27.1283	25.6732	25.2205	25.0299	0	75.905	31	9	9	9	9	7	Q99N15;A2AFQ2;O08756	Q99N15;A2AFQ2;O08756	3-hydroxyacyl-CoA dehydrogenase type-2
Rpl34	2.0372	27.1339	27.1118	25.1079	25.0634	25.8525	0	5.952	10	3	3	3	3	3	Q9D1R9;A0A0G2JGY8;A0A0G2JEY6	Q9D1R9	60S ribosomal protein L34
Rpl28	2.03704	27.8514	27.7441	25.7255	25.7959	26.1132	0	13.753	17	4	4	4	4	4	P41105	P41105	60S ribosomal protein L28
Hdlbp	2.03687	26.4987	26.1804	24.4799	24.1253	21.6189	0	29.48	18	6	6	6	6	5	Q8VDJ3;A0A087WP83;A0A087WQY9;A0A087WPC5;A0A087WS92;A0A087WPH2	Q8VDJ3;A0A087WP83	Vigilin
Mtpn	2.03638	29.2072	29.0316	27.3092	26.8569	27.8548	0	70.6	33	6	5	6	6	6	P62774;A0A0J9YV46	P62774;A0A0J9YV46	Myotrophin
Cpt2	2.0358	25.9704	26.0068	23.7323	24.1733	22.1776	0	16.194	10	6	5	5	4	5	P52825;A2A8E8;A2A8E7;A2A8E9	P52825;A2A8E8	Carnitine O-palmitoyltransferase 2, mitochondrial
Psmd3	2.03528	25.1211	25.4056	23.3853	23.0707	21.4981	0	14.238	10	4	3	4	3	3	P14685	P14685	26S proteasome non-ATPase regulatory subunit 3
Mcm3	2.03516	27.1461	27.3229	24.9837	25.415	22.911	0	50.671	27	11	9	10	11	11	P25206	P25206	DNA replication licensing factor MCM3
Blmh	2.03437	26.2557	26.0063	24.2071	23.9862	22.7509	0	14.955	13	7	7	7	7	6	Q8R016;E9PY26;E9Q6V3;E9PZH4	Q8R016;E9PY26	Bleomycin hydrolase
Pla2g7	2.034	24.9412	21.9328	19.8092	22.9968	21.1916	0	6.4351	3	3	3	1	1	2	Q60963;E9Q330	Q60963	Platelet-activating factor acetylhydrolase
Stat2	2.03398	23.0947	22.9508	21.2554	20.7221	19.0223	0	6.9882	6	2	2	2	2	2	Q9WVL2;Q9QXJ2;E9QJX9	Q9WVL2;Q9QXJ2;E9QJX9	Signal transducer and activator of transcription 2;Signal transducer and activator of transcription
Camk1d	2.03373	25.5947	25.3632	23.6442	23.2462	22.6307	0	15.951	7	6	6	6	6	4	Q8BW96	Q8BW96	Calcium/calmodulin-dependent protein kinase type 1D
Clec1b	2.03259	25.9356	25.4523	23.8675	23.4553	23.2212	0	25.045	6	3	2	3	2	2	Q9JL99;A0T1G3	Q9JL99	C-type lectin domain family 1 member B
Hdgfrp2	2.03224	26.1044	25.7154	24.5065	23.2488	22.2628	0	15.237	8	3	3	3	3	2	Q3UMU9	Q3UMU9	Hepatoma-derived growth factor-related protein 2
Syk	2.03177	29.4165	29.4047	27.5526	27.2051	25.5584	0	152.99	70	19	19	19	18	16	P48025;E9PWE9;Q8BZ25	P48025;E9PWE9	Tyrosine-protein kinase SYK;Tyrosine-protein kinase
Denr	2.03101	24.7088	24.412	22.5169	22.5419	22.7124	0	3.3649	4	2	2	2	2	2	Q9CQJ6;E9Q0G1	Q9CQJ6;E9Q0G1	Density-regulated protein
Syncrip	2.0309	29.1246	28.9907	27.0583	26.9953	25.3748	0	81.611	51	19	17	17	18	17	Q7TMK9;A0A0R4J259;G3UZI2;G3V018;G3UXJ6;G3UZ48;G3UWM1;G3XA76	Q7TMK9;A0A0R4J259;G3UZI2;G3V018;G3UXJ6;G3UZ48	Heterogeneous nuclear ribonucleoprotein Q
Arpc5	2.03085	30.3434	30.1832	28.435	28.0299	28.2618	0	80.871	27	7	7	7	7	7	Q9CPW4;Q3UA72	Q9CPW4;Q3UA72	Actin-related protein 2/3 complex subunit 5
Eif2a	2.0303	26.1443	25.9476	23.9697	24.0616	22.4105	0	13.496	7	5	5	5	5	5	Q8BJW6;D6RFN2;D6RGA6;D3YZZ6	Q8BJW6	Eukaryotic translation initiation factor 2A;Eukaryotic translation initiation factor 2A, N-terminally processed
Myl6	2.03024	32.192	31.993	30.1257	29.9989	30.0895	0	68.048	65	8	8	8	8	8	Q60605;A0A1W2P6F6;A0A1W2P7Q9;Q8CI43	Q60605;A0A1W2P6F6;A0A1W2P7Q9	Myosin light polypeptide 6
Snd1	2.03015	28.469	28.5175	26.502	26.4242	24.0546	0	111.73	58	18	16	18	16	16	Q78PY7;Q3TJ56;E9Q3E9	Q78PY7;Q3TJ56	Staphylococcal nuclease domain-containing protein 1
Tor1aip1	2.03012	26.3553	26.4857	24.7491	24.0316	22.702	0	14.046	6	5	4	5	4	3	Q921T2;J3QQ40;Q3UE61;E9PWW2;D3YXF8	Q921T2;J3QQ40;Q3UE61	Torsin-1A-interacting protein 1
Gosr2	2.03002	20.8797	21.6109	19.0887	19.3418	19.4668	0	5.0311	5	2	1	2	1	2	A2A9I0;O35166	A2A9I0;O35166	Golgi SNAP receptor complex member 2
Tbca	2.02999	27.1821	26.8005	25.1246	24.7979	25.7342	0	28.651	18	8	8	7	8	7	P48428;A0A1Y7VJ48	P48428;A0A1Y7VJ48	Tubulin-specific chaperone A
Asph	2.02925	24.1337	23.735	21.729	22.0812	20.4562	0	8.4283	2	3	3	3	3	3	Q8BSY0;Q8CBM2;A2AL85	Q8BSY0;Q8CBM2;A2AL85	Aspartyl/asparaginyl beta-hydroxylase
Arhgef1	2.02911	28.1183	27.8982	26.0243	25.934	23.7733	0	107.12	51	21	19	20	20	17	E9PUF7;Q61210;F6ZN61;A0A0U1RPN7;A0A0U1RPP2;A0A0U1RPH2;D3YVJ9	E9PUF7;Q61210;F6ZN61	Rho guanine nucleotide exchange factor 1
Suclg1	2.02872	27.6139	27.2764	25.6033	25.2295	25.0712	0	32.698	18	6	6	6	6	6	Q9WUM5	Q9WUM5	Succinyl-CoA ligase [ADP/GDP-forming] subunit alpha, mitochondrial
Ctss	2.02743	30.1418	29.7608	28.0514	27.7962	27.5785	0	115.27	48	10	10	10	9	10	F6WR04;O70370	F6WR04;O70370	Cathepsin S
Ppp3r1	2.02635	23.5327	23.5574	21.4771	21.5603	21.692	0	8.9094	4	2	2	2	2	2	Q63810	Q63810	Calcineurin subunit B type 1
Aifm1	2.02621	27.2926	26.9772	25.1799	25.0375	23.5047	0	40.538	35	10	9	9	10	9	Q9Z0X1;B1AU25	Q9Z0X1;B1AU25	Apoptosis-inducing factor 1, mitochondrial
Anxa5	2.02613	30.8388	30.6391	28.8749	28.5508	27.5367	0	175.32	79	20	18	18	18	18	P48036;A0A0G2JGQ0	P48036	Annexin A5
Snx9	2.02577	26.1959	25.5852	23.7956	23.9339	22.5896	0	36.383	15	7	7	7	4	5	Q91VH2	Q91VH2	Sorting nexin-9
Rad23b	2.02561	26.8466	26.8434	24.7828	24.856	24.4615	0	40.42	25	8	8	8	7	8	P54728	P54728	UV excision repair protein RAD23 homolog B
Sec23a	2.02556	24.0756	23.7152	21.6611	22.0787	20.0148	0	14.295	6	4	4	4	3	4	Q01405;E9Q1S3	Q01405;E9Q1S3	Protein transport protein Sec23A
Drg1	2.02542	24.0664	24.7598	21.7503	23.0251	21.267	0	10.525	7	3	2	3	2	3	P32233	P32233	Developmentally-regulated GTP-binding protein 1
Rpl23	2.02518	29.3556	28.9454	27.2725	26.9781	27.3106	0	36.684	38	5	5	5	5	5	P62830;A2A6F8	P62830	60S ribosomal protein L23
Mtco2	2.02378	29.5697	28.3852	26.9929	26.9144	27.3905	0	37.017	23	5	5	5	5	5	P00405	P00405	Cytochrome c oxidase subunit 2
Ptges2	2.02356	24.6306	23.2669	22.3225	21.5278	20.7581	0	11.917	4	4	4	2	4	3	Q8BWM0	Q8BWM0	Prostaglandin E synthase 2;Prostaglandin E synthase 2 truncated form
Eif4e2	2.02353	21.5694	21.4136	19.4167	19.5192	18.9659	0.00075358	2.6936	2	1	1	1	0	1	Q0P688;M0QWD1;D3Z730	Q0P688;M0QWD1;D3Z730
Wipf1	2.02305	27.1461	27.2996	25.5621	24.8375	23.6439	0	17.703	18	7	6	7	7	6	Q8K1I7;F6RQI2;F6QWW7	Q8K1I7	WAS/WASL-interacting protein family member 1
Arpc1a	2.02216	24.6502	24.9604	22.7596	22.8068	21.7373	0	5.3193	3	3	2	3	2	2	Q9R0Q6;A0A0G2JF52	Q9R0Q6;A0A0G2JF52	Actin-related protein 2/3 complex subunit 1A
Hsd17b4	2.0208	28.4873	28.1562	26.3544	26.2475	24.362	0	51.679	37	16	15	15	15	14	P51660	P51660	Peroxisomal multifunctional enzyme type 2;(3R)-hydroxyacyl-CoA dehydrogenase;Enoyl-CoA hydratase 2
Rps11	2.02011	29.4179	29.0884	27.2255	27.2406	27.2566	0	44.949	39	10	10	10	10	9	P62281;A0A1B0GRR3;A0A1B0GSE8	P62281;A0A1B0GRR3;A0A1B0GSE8	40S ribosomal protein S11
Ndufa10	2.01991	27.6329	27.068	25.4035	25.2576	24.2986	0	29.967	33	10	10	9	10	9	Q99LC3;A0A087WR38	Q99LC3	NADH dehydrogenase [ubiquinone] 1 alpha subcomplex subunit 10, mitochondrial
Wdr91	2.01902	23.2182	22.7748	21.2563	20.6986	19.0116	0.0095433	1.7393	2	1	1	1	1	1	Q7TMQ7;S4R1X1	Q7TMQ7;S4R1X1	WD repeat-containing protein 91
Gatad2b	2.01892	23.0726	22.8706	20.5323	21.3731	19.4468	0.00074377	2.56	1	1	1	1	1	1	Q8VHR5;A0A0U1RNM2;A1L3S7	Q8VHR5;A0A0U1RNM2;A1L3S7	Transcriptional repressor p66-beta
Slpi	2.01835	27.6647	27.0866	25.3765	25.3381	25.9097	0	5.8524	8	3	3	3	3	3	E9Q748;P97430	E9Q748;P97430	Antileukoproteinase
Prpsap2	2.01828	26.1167	25.8338	24.0363	23.8776	22.776	0	17.068	10	5	5	5	5	5	Q8R574	Q8R574	Phosphoribosyl pyrophosphate synthase-associated protein 2
Arf3;Arf1	2.01789	29.4062	29.3556	27.4578	27.2682	27.3782	0	45.182	38	9	9	8	9	9	P61205;P84078	P61205;P84078	ADP-ribosylation factor 3;ADP-ribosylation factor 1
Ddx17	2.01725	29.8221	29.4756	27.7042	27.559	25.976	0	65.561	55	16	16	16	16	14	Q501J6;Q3U741;Q3TU25	Q501J6;Q3U741;Q3TU25	Probable ATP-dependent RNA helicase DDX17
Ndufs2	2.01489	26.6158	25.7965	24.1779	24.2046	22.8709	0	27.341	19	7	7	7	6	6	Q91WD5;D3YXT0;A0A0A6YW30	Q91WD5;D3YXT0	NADH dehydrogenase [ubiquinone] iron-sulfur protein 2, mitochondrial
Ccdc115	2.0134	22.8225	22.6591	20.7665	20.6883	20.477	0	4.5785	1	1	1	1	1	1	Q8VE99	Q8VE99	Coiled-coil domain-containing protein 115
Aldh16a1	2.01292	25.5775	25.5544	23.2929	23.8131	22.3664	0	11.805	7	3	3	3	2	3	Q571I9;D3Z0B9;A0A1B0GSU0;A0A1B0GSN3	Q571I9;D3Z0B9;A0A1B0GSU0	Aldehyde dehydrogenase family 16 member A1
Etfb	2.01252	29.5418	29.2454	27.4064	27.3557	27.0187	0	63.052	59	15	15	15	13	13	Q9DCW4;A0A0U1RNP5;A0A0N4SVE0;A0A0U1RNR3;A0A0N4SWE9;A0A0U1RNK9;A0A0U1RQB4	Q9DCW4;A0A0U1RNP5;A0A0N4SVE0;A0A0U1RNR3	Electron transfer flavoprotein subunit beta
Srrm1	2.01152	27.6867	27.1955	25.2673	25.5919	23.353	0	24.125	16	6	6	6	5	6	Q52KI8;A2A8V9;E9QKA4;A2A8V8;E9PUK6;A2A983;F6T4M4;F7BWM1;F6UK16	Q52KI8;A2A8V9;E9QKA4;A2A8V8;E9PUK6;A2A983	Serine/arginine repetitive matrix protein 1
Copg1	2.01092	25.771	25.7976	23.9197	23.627	21.582	0	22.885	10	7	7	7	7	5	Q9QZE5	Q9QZE5	Coatomer subunit gamma-1
Dpy30	2.01023	25.5311	25.1587	23.5066	23.1627	24.6764	0	26.981	9	4	4	4	4	4	Q99LT0	Q99LT0	Protein dpy-30 homolog
Eif4b	2.00999	27.3309	27.1774	25.2793	25.2091	23.8754	0	67.367	32	9	9	9	9	9	Q8BGD9;B2RWE8	Q8BGD9;B2RWE8	Eukaryotic translation initiation factor 4B
Rfc3	2.00881	22.6519	22.3053	20.4849	20.4547	19.0967	0	5.6656	2	1	1	1	0	0	Q8R323	Q8R323	Replication factor C subunit 3
Cdc5l	2.00845	26.6834	26.4421	24.5347	24.5738	22.6391	0	33.351	22	11	9	10	8	10	Q6A068;A0A1W2P7S8;A0A1W2P855;A0A1W2P7Z8;A0A1W2P7H4;A0A1W2P6Q8	Q6A068;A0A1W2P7S8;A0A1W2P855;A0A1W2P7Z8;A0A1W2P7H4;A0A1W2P6Q8	Cell division cycle 5-like protein
Tmx1	2.00753	26.1847	26.0435	24.0439	24.1691	24.1142	0	16.405	13	6	5	5	5	5	Q8VBT0;F6V084	Q8VBT0;F6V084	Thioredoxin-related transmembrane protein 1
Tbc1d10c	2.00702	24.3592	23.9875	21.4445	22.8883	21.0801	0	8.4538	3	3	3	3	1	3	Q8C9V1	Q8C9V1	Carabin
Tbrg4	2.00645	23.1081	22.331	20.5763	20.85	19.0386	0.00322	2.1909	1	1	1	1	1	1	Q91YM4;Q5SWP0;Q5SWP1;E9PUT1	Q91YM4;Q5SWP0;Q5SWP1;E9PUT1	Protein TBRG4
Rps6	2.00527	29.6654	28.8204	27.1872	27.2882	27.613	0	28.099	17	4	4	3	4	4	P62754	P62754	40S ribosomal protein S6
Slc9a3r1	2.00326	28.2433	28.2705	26.3553	26.152	25.1866	0	34.06	29	10	10	9	8	8	P70441	P70441	Na(+)/H(+) exchange regulatory cofactor NHE-RF1
Cox5b	2.00205	28.585	27.4386	25.6437	26.3757	26.4315	0	21.902	27	6	6	6	6	6	P19536;Q9D881;F7C106;A0A0A6YVR0	P19536;Q9D881	Cytochrome c oxidase subunit 5B, mitochondrial
Prex1	2.00083	25.1512	24.9792	23.0221	23.1067	20.0316	0	16.118	4	5	5	5	5	5	Q69ZK0;I7HPV9	Q69ZK0;I7HPV9	Phosphatidylinositol 3,4,5-trisphosphate-dependent Rac exchanger 1 protein
Arap1	1.99988	25.0657	25.0388	22.8617	23.243	20.3323	0	12.148	14	5	5	5	4	5	Q4LDD4;E9PUB0;D3YWW7	Q4LDD4;E9PUB0	Arf-GAP with Rho-GAP domain, ANK repeat and PH domain-containing protein 1
Map4	1.99973	26.1504	26.2811	24.2569	24.1751	21.7061	0	36.591	20	10	10	10	8	10	P27546;A0A140T8T5;E9PZ43;A0A0G2JFH2;Q78TF3;A0A0G2JFK3;A0A0G2JDY5;A0A0G2JG35;A0A0G2JDN7;A0A0G2JE57;A0A0G2JDU1;A0A0G2JFT4	P27546;A0A140T8T5	Microtubule-associated protein 4
Mpp6	1.99938	25.3439	24.1093	23.1729	22.2816	21.1206	0	7.6398	3	4	4	2	4	2	Q9JLB0;E9PWC5	Q9JLB0;E9PWC5	MAGUK p55 subfamily member 6
	1.99852	28.4612	27.9415	26.2407	26.1648	26.3724	0	53.332	27	1	1	1	1	1	A0A1W2P6G5	A0A1W2P6G5
Crkl	1.99807	26.3228	26.2218	24.1524	24.3961	23.5964	0	25.745	16	7	6	6	6	7	P47941;A0A338P675;A0A338P6Q0	P47941;A0A338P675	Crk-like protein
Epb4.1l2;Epb41l2	1.9974	28.3765	27.932	26.2025	26.1111	23.7625	0	65.67	43	18	18	18	15	17	Q80UE5;O70318;Q80UE4;Q8C928;A0A1W2P6I5;A0A1W2P7I4;A0A1W2P896;A0A1W2P7H7;A0A1W2P7I2;A0A1W2P8C0	Q80UE5;O70318;Q80UE4;Q8C928;A0A1W2P6I5	Band 4.1-like protein 2
Dimt1	1.99658	25.0324	24.4323	22.7462	22.7254	21.9099	0	5.1862	6	3	3	3	3	3	Q9D0D4;A0A286YCE5	Q9D0D4	Probable dimethyladenosine transferase
Sfpq	1.99605	30.6916	30.3987	28.5317	28.5665	26.967	0	105.27	81	21	21	20	18	21	Q8VIJ6	Q8VIJ6	Splicing factor, proline- and glutamine-rich
Rrs1	1.99558	21.9906	21.8797	19.7368	20.1423	19.0918	0	7.3966	2	1	1	1	1	1	Q9CYH6	Q9CYH6	Ribosome biogenesis regulatory protein homolog
Apmap	1.99536	24.525	24.7481	22.754	22.5284	21.4402	0	5.1785	3	2	2	2	2	2	Q9D7N9	Q9D7N9	Adipocyte plasma membrane-associated protein
Taok3	1.9944	26.6402	25.9922	24.5443	24.0993	22.2452	0	27.746	15	8	8	8	8	6	Q8BYC6;Q3V3K3;A0A0R4J1T3;F6RXB5;Q5F2E8	Q8BYC6;Q3V3K3;A0A0R4J1T3	Serine/threonine-protein kinase TAO3
Bud31	1.99411	25.0776	24.8546	22.9379	23.0061	23.2928	0	10.764	8	3	3	3	2	3	Q6PGH1	Q6PGH1	Protein BUD31 homolog
Snx12	1.99263	24.466	24.5927	22.651	22.4225	22.5329	0	8.5189	7	3	3	3	3	3	O70493;Q6ZWQ5;Q3TGS7;Q3V2H3	O70493;Q6ZWQ5;Q3TGS7;Q3V2H3	Sorting nexin-12
Cmpk2	1.99239	22.6821	23.1877	21.1664	20.7186	19.7559	0.0025455	2.3761	1	1	1	1	1	1	Q3U5Q7	Q3U5Q7	UMP-CMP kinase 2, mitochondrial
Ddx27	1.99231	23.2525	22.7421	20.8793	21.1308	18.9136	0.00075216	2.6784	3	1	1	1	1	1	Q921N6	Q921N6	Probable ATP-dependent RNA helicase DDX27
Man2b2	1.99194	27.8804	27.224	25.448	25.6726	23.4468	0	30.04	20	6	6	6	5	6	O54782;F6TMZ3;F6Z025	O54782;F6TMZ3	Epididymis-specific alpha-mannosidase
Rcc1	1.99193	27.5413	27.3682	25.387	25.5386	24.7808	0	45.753	19	7	7	7	6	6	Q8VE37;Q6PFB2;A2CER2	Q8VE37;Q6PFB2	Regulator of chromosome condensation
Mbp	1.99164	23.5145	23.2488	21.601	21.1789	21.5433	0	8.4618	1	1	1	1	1	1	P04370	P04370	Myelin basic protein
Aagab	1.99147	21.5384	21.7126	19.7582	19.5098	19.0454	0	4.0009	1	1	1	1	1	1	Q8R2R3	Q8R2R3	Alpha- and gamma-adaptin-binding protein p34
Hsdl2	1.99132	25.01	24.7976	22.8874	22.9376	21.2306	0	10.118	9	4	4	4	4	3	Q2TPA8;B1AX78	Q2TPA8;B1AX78	Hydroxysteroid dehydrogenase-like protein 2
Stxbp2	1.99101	27.2557	27.62	25.4527	25.441	23.7708	0	43.034	28	14	13	14	13	13	Q64324;F8WGM5	Q64324;F8WGM5	Syntaxin-binding protein 2
Apoe	1.99077	29.8689	28.925	27.6059	27.2065	26.8775	0	29.428	31	9	8	8	8	8	P08226;A0A1B0GX15;G3UWN5;G3UZM8	P08226;A0A1B0GX15;G3UWN5	Apolipoprotein E
Gtf2e2	1.99046	21.5066	21.2559	19.1867	19.5949	18.5424	0	3.2761	1	1	1	1	1	1	Q9D902	Q9D902	General transcription factor IIE subunit 2
Tuba4a	1.99038	29.996	29.7506	27.9857	27.7802	26.8098	0	49.995	24	7	7	7	7	6	P68368;A0A0A0MQA5;A0A087WQS4;A0A087WRB4;A0A087WSB0;A0A087WSL5;Q3UX10;A0A087WS35	P68368;A0A0A0MQA5	Tubulin alpha-4A chain
Gmip	1.99038	23.1866	23.015	21.1083	21.1124	18.9348	0	5.7172	2	1	1	1	1	1	Q6PGG2	Q6PGG2	GEM-interacting protein
Lcp2	1.99008	27.6196	27.405	25.5694	25.4751	24.1391	0	51.011	33	11	11	11	10	10	Q60787;B1ATD1	Q60787;B1ATD1	Lymphocyte cytosolic protein 2
Ecm1	1.98963	23.6487	22.9254	21.1892	21.4056	19.6936	0.0032086	2.1627	1	1	1	1	1	1	Q61508;D3Z772;D3YV22;D3Z0U9;D3Z038;D3YV64;F8WI14	Q61508;D3Z772;D3YV22;D3Z0U9;D3Z038;D3YV64;F8WI14	Extracellular matrix protein 1
Gtf2a1	1.98888	22.7869	22.821	20.851	20.7791	21.8063	0	5.0912	4	2	2	2	2	1	Q99PM3	Q99PM3	Transcription initiation factor IIA subunit 1;Transcription initiation factor IIA alpha chain;Transcription initiation factor IIA beta chain
Dpp4	1.98877	26.2309	25.8621	24.1328	23.9827	22.0585	0	8.411	6	3	3	3	3	3	P28843	P28843	Dipeptidyl peptidase 4;Dipeptidyl peptidase 4 membrane form;Dipeptidyl peptidase 4 soluble form
Rpl27	1.98798	28.807	28.545	26.7049	26.6711	27.4201	0	27.304	19	6	6	5	6	6	P61358;A2A4Q0	P61358	60S ribosomal protein L27
Sdpr	1.98745	29.0712	28.7975	27.1223	26.7715	25.8067	0	120.9	41	12	12	12	12	12	Q63918	Q63918	Serum deprivation-response protein
Ap1g1	1.98678	21.6819	21.7079	19.3844	20.0318	17.7042	0	3.3071	2	1	1	1	1	0	P22892;Q8CBB7	P22892;Q8CBB7	AP-1 complex subunit gamma-1
Cotl1	1.9863	31.6298	31.6323	29.7427	29.5468	29.7864	0	49.791	55	9	9	9	9	8	Q9CQI6;A0A1D5RLP1	Q9CQI6	Coactosin-like protein
Rpl18a	1.9859	26.8157	26.8265	24.7536	24.9167	24.9764	0	8.1564	6	3	3	3	3	3	P62717;A0A1D5RLW5;A0A1D5RM85;A0A1D5RM79;A0A1D5RME4;A0A1D5RMC7	P62717;A0A1D5RLW5;A0A1D5RM85;A0A1D5RM79;A0A1D5RME4	60S ribosomal protein L18a
Ranbp1	1.98586	28.2569	27.9436	26.2868	25.9419	26.4338	0	32.088	26	7	6	6	7	7	P34022;H7BX22	P34022;H7BX22	Ran-specific GTPase-activating protein
Dync1li1	1.98554	26.8985	26.6367	24.8621	24.702	23.1907	0	30.532	17	10	9	9	9	9	Q8R1Q8	Q8R1Q8	Cytoplasmic dynein 1 light intermediate chain 1
Dnajc9	1.98492	27.7701	28.1103	25.8835	26.027	25.5731	0	56.006	37	12	10	12	9	11	Q91WN1	Q91WN1	DnaJ homolog subfamily C member 9
Hnrnpk	1.98421	30.8951	30.8714	28.7654	29.0326	27.6861	0	165.33	102	19	18	19	19	19	P61979;H3BLL4;A0A286YDM3;H3BK96;A0A286YCM2;A0A286YEC4;A0A286YDH1;A0A286YE41;H3BJ43	P61979;H3BLL4;A0A286YDM3;H3BK96;A0A286YCM2	Heterogeneous nuclear ribonucleoprotein K
Pla2g15	1.98314	27.955	27.02	25.6413	25.3674	24.7864	0	36.58	32	10	10	9	8	8	Q8VEB4;A0A1D5RLZ5	Q8VEB4;A0A1D5RLZ5	Group XV phospholipase A2
Ftsj3	1.98257	21.6069	20.76	19.1047	19.297	17.4293	0.00074047	2.528	2	1	1	1	1	1	Q9DBE9	Q9DBE9	pre-rRNA processing protein FTSJ3
Rassf4	1.98243	23.5193	23.5744	21.6543	21.4745	20.5511	0	7.801	4	1	1	1	1	1	Q8CB96;A0A0N4SVF1	Q8CB96;A0A0N4SVF1	Ras association domain-containing protein 4
Pspc1	1.98134	24.9566	25.0738	22.8984	23.1693	21.9508	0	8.3766	7	3	3	3	3	3	Q8R326;F7D909	Q8R326;F7D909	Paraspeckle component 1
Hist1h1b	1.98111	31.7057	32.0555	29.6946	30.1044	30.0478	0	32.928	39	10	9	10	9	10	P43276	P43276	Histone H1.5
H2afv;H2afz	1.97935	29.9751	30.0123	27.9369	28.0918	28.9984	0	12.307	12	2	2	2	2	2	Q3THW5;P0C0S6;Q8R029;Q3UA95	Q3THW5;P0C0S6;Q8R029;Q3UA95	Histone H2A.V;Histone H2A.Z;Histone H2A
Timm8a1	1.97926	26.1327	26.0062	23.8132	24.3672	25.0801	0	10.866	10	4	3	3	3	4	Q9WVA2;Q4FZG7	Q9WVA2	Mitochondrial import inner membrane translocase subunit Tim8 A
Wdr81	1.97887	21.0261	20.7128	19.1335	18.6478	15.8142	0	3.168	2	1	1	1	1	1	Q5ND34;K4DI77	Q5ND34;K4DI77	WD repeat-containing protein 81
Alyref	1.97836	28.6687	28.4998	26.6999	26.5119	26.2127	0	84.602	32	8	8	8	8	8	O08583	O08583	THO complex subunit 4
Rps3	1.97758	30.2611	30.0355	28.1608	28.1807	27.2303	0	51.798	48	16	16	14	14	14	P62908;D3YV43;A0A140LI77	P62908;D3YV43;A0A140LI77	40S ribosomal protein S3
Crip1	1.97746	28.4502	28.2345	26.6824	26.0474	27.6791	0	15.645	14	2	2	2	2	2	P63254;A0A0G2JEK2	P63254;A0A0G2JEK2	Cysteine-rich protein 1
Arhgap25	1.97679	27.2255	27.305	25.2935	25.2834	23.2347	0	39.057	32	12	10	11	11	11	Q8BYW1	Q8BYW1	Rho GTPase-activating protein 25
Chchd3	1.97608	26.9621	26.5469	24.784	24.7729	24.5082	0	9.9248	9	3	3	3	3	3	Q9CRB9;S4R238;Q9D9P1;D3Z0L4;F6QFL0	Q9CRB9;S4R238;Q9D9P1;D3Z0L4	MICOS complex subunit Mic19
Acadm	1.97576	27.7123	27.4742	25.6281	25.607	24.6021	0	12.383	16	6	6	6	6	6	P45952;D6RFD7	P45952	Medium-chain specific acyl-CoA dehydrogenase, mitochondrial
Rpl30	1.97538	28.7553	28.379	26.682	26.5015	27.3194	0	20.721	26	5	4	4	5	4	P62889;A0A2I3BQF4	P62889;A0A2I3BQF4	60S ribosomal protein L30
Ap2m1	1.97471	26.2238	26.1118	24.0741	24.3121	22.7962	0	13.817	12	5	4	5	4	3	P84091;Q3TWV4;A0A338P6T4	P84091;Q3TWV4	AP-2 complex subunit mu
Ilvbl	1.97375	22.4202	21.9252	20.2202	20.1777	18.8164	0	8.4291	3	1	1	1	1	1	Q8BU33;A0A1W2P8D6;A0A1W2P727;A0A1W2P8E1	Q8BU33;A0A1W2P8D6;A0A1W2P727;A0A1W2P8E1	Acetolactate synthase-like protein
Manba	1.97368	26.2218	25.7968	24.1013	23.97	21.7644	0	14.993	15	6	6	5	5	5	Q8K2I4;A0A0R4J092;D6RGR1	Q8K2I4;A0A0R4J092	Beta-mannosidase
[truncated: 780 more rows]
