# Supplementary material for: Impaired iron recycling from erythrocytes is an early hallmark of aging
Source: eLife. 2023 Jan 31;12:e79196. doi: 10.7554/eLife.79196 (PMC9931393; doi:10.7554/eLife.79196)
Supplement: Figure 4—source data 1. [file elife-79196-fig4-data1.xlsx]

## Sheet: Arkusz1
Figure 4 - Source Data 1 Related to Figure 4 (A-E) and (G-K)
RPM dysfunction develops early in aging and is associated with ferroportin downregulation.
(A) Cytosolic ferrous iron (Fe2+) content in RPMs derived from mice at the indicated age was measured using FerroOrange and flow cytometry.
	Labile iron (normalized MFI)
2 months	0.644549	0.774358	0.730988	0.905364
5 months	0.929549	1.03078	0.950235	0.941451	0.996957
6 months	1.1456	0.912361	1.15819	0.858217	1.22744
7.5 months	1.13311	1.16119	1.26342	1.14195	0.814022
9 months	0.978715	1.17418	1.01279	0.965825	0.966726
(B) Erythrophagocytosis capacity of RPMs derived from mice at the indicated age was determined using flow cytometry by measuring the percentage of RPMs that phagocytosed transfused PKH67-labeled temperature-stressed RBCs.
	Erythrophagocytosis rate (% of RBC+ RPMs)
2 months	44.8	42.66	37.88	40.97	41.29
5 months	24.58	33	27.88	28.52	28.32
6 months	25.2	23.23	16.77	31.44	33.42
7.5 months	28.24	27.44	18.23	30.85	28.85
9 months	24.42	29.15	22.02	18.23	24.76
(C) Lysosomal activity in RPMs derived from mice at the indicated age was determined using a dedicated fluorescent probe and flow cytometry.
	Lysosomal activity (normalized MFI)
2 months	1.72397	1.64161	1.30864	1.15072
5 months	0.777949	0.91527	1.22534	0.717317
6 months	0.953299	1.10162	0.876027	0.963497
7.5 months	0.912592	0.595389	1.04688	0.821492
9 months	0.684877	0.693425	1.06746	0.822633
(D) The cytosolic ROS levels in RBCs derived from the spleens of mice at the indicated age were estimated by determining CellROX Deep Red fluorescence intensity with flow cytometry.
	Oxidative stress in splenic RBCs (normalized MFI)
2 months	0.699941	0.880923	0.620923	0.803026	0.772204
5 months	1.11181	1.04256	0.965449	1.27705	1.12028
6 months	0.97195	1.26895	1.23392	0.927532	1.13791
7.5 months	0.895844	0.99351	1.15565	1.22289	0.893052
9 months	1.0165	1.11802	0.903196	0.999375	0.967556
(E) Splenic non-heme iron content was determined in mice at the indicated age.
	Spleen non-heme iron (μg/g dry tissue)
2 months	1990.43	2011.39	1917.1	2985.65	2315.19
5 months	6348.43	5897.97	6317.01	5510.36	4263.72
6 months	5332.27	6652.24	6411.29	6578.91	6526.53
7.5 months	4420.86	6641.76	6442.72	6610.33	6516.05
9 months	6516.05	5206.55	6505.57	6159.87	5028.46
(G) Plasma transferrin saturation was determined in mice at the indicated age.
	Transferrin saturation (%)
2 months	55.9119	63.1279	50.2236
5 months	31.6749	32.5012	37.9482
6 months	40.5178	34.185	43.6695
7.5 months	44.6621	33.3596	34.1581
9 months	25.4103	31.8277	31.6713
(H) Expression of ferroportin (FPN) on the cell membrane of RPMs derived from mice at the indicated age was assessed by flow cytometry.
	Surface FPN (normalized MFI)
2 months	1.15736	1.19266	1.06793	1.0908	1.13549	1.18787
3 months	0.999086	1.12215	1.15421	0.998984	0.938213	0.921433
4 months	0.917834	0.816297	0.857274	0.940453	1.12399	0.930242
5 months	0.906431	0.888186	0.949917	0.940429	0.883288	0.879466
(I) Relative mRNA expression of hepcidin (Hamp) in the liver from mice at the indicated age was determined by qPCR.
	Liver HAMP mRNA expression (fold change)
2 months	1	1.79	1.23	1.4	1.33
3 months	1.87	1.25	1.76	2.19	1.92
4 months	1.61	1.76	2.21	1.65	2.1
5 months	2.31	2.67	2.94	2.95	1.78
(J) Erythrophagocytosis capacity of RPMs derived from mice at the indicated age was determined by intracellular staining of the erythrocytic marker TER119 in RPMs and flow cytometry.
	Intracellular TER119 levels in RPMs (normalized MFI)
2 months	1.26329	1.41145	1.28561	1.04935
3 months	1.14915	1.24614	0.954875	0.852487
4 months	0.586721	0.779087	0.95958	0.85301
5 months	0.708772	0.855404	1.06959	0.975506
(K) The cytosolic ROS levels in RBCs derived from the spleens of mice at the indicated age were estimated by determining CellROX Deep Red fluorescence intensity with flow cytometry.
	Oxidative stress in splenic RBCs (normalized MFI)
2 months	0.672879	1.04178	0.450654	0.635899	0.862796	0.644917
3 months	1.24403	0.966833	0.889231	0.974532	0.700441	0.84325
4 months	0.896371	0.973005	1.02489	0.927514	0.753617	1.67246
5 months	1.11858	1.08651	1.49918	1.5981	1.03531	1.48721
