# Supplementary material for: Impaired iron recycling from erythrocytes is an early hallmark of aging
Source: eLife. 2023 Jan 31;12:e79196. doi: 10.7554/eLife.79196 (PMC9931393; doi:10.7554/eLife.79196)
Supplement: Figure 5—figure supplement 1—source data 1. [file elife-79196-fig5-figsupp1-data1.xlsx]

## Sheet: Arkusz1
Figure 5-figure supplement 1. Mitochondrial oxidative stress and ATP levels in young, aged and aged IR RPMs.
(A) The mitochondria-associated ROS levels in young, aged and aged IR RPMs was determined using the MitoSOX Red probe with flow cytometry.
	Mitochondrial oxidative stress (normalized MFI)
Young	1.06255	1.20512	1.6182	1.30869	0.754923	0.897155
Aged	0.792039	0.811535	1.19781	0.905361	1.08972	0.995624
Aged IR	0.717709	0.538586	0.962632	0.879773	1.26258
(B) Levels of ATP in FACS-sorted RPMs isolated from young, aged, and aged IR mice were measured using ATP Fluorometric Assay Kit.
	RPMs ATP (chemiluminescence fold change)
Young	0.773587	1.0886	1.0739	0.737646	0.944342	0.992556	1.33591	1.05946	1.10051
Aged	0.7929	1.02107	0.892776	0.526943	0.478411	1.12943	0.759071	0.89191	0.941647
Aged IR	1.05683	1.00955	1.29078	0.934481	1.40873	1.84746	0.618278	0.951996	1.3412
