# Supplementary material for: Impaired iron recycling from erythrocytes is an early hallmark of aging
Source: eLife. 2023 Jan 31;12:e79196. doi: 10.7554/eLife.79196 (PMC9931393; doi:10.7554/eLife.79196)
Supplement: Figure 5—source data 1. [file elife-79196-fig5-data1.xlsx]

## Sheet: Arkusz1
Figure 5 - Source Data 1 Related to Figure 5 (A-F) and (H-K)
Aging triggers RPM loss via mechanisms that resemble ferroptosis and involve proteotoxicity.
(A) Lipid peroxidation was determined in RPMs derived from mice at the indicated age using a dedicated ratiometric fluorescent probe and flow cytometry.
	Lipid Peroxidation (normalized MFI)
2 months	0.154236	0.173853	0.215039	0.279822	0.275364
5 months	0.301782	0.354799	0.33662	0.412493	0.427606
6 months	0.471557	0.416299	0.537869	0.44213	0.546028
7.5 months	0.368977	0.490933	0.446328	0.457633	0.401017
9 months	0.247495	0.384809	0.264224	0.40188	0.412934
(B) Lipid peroxidation was determined in RPMs derived from young, aged, and aged IR mice using a dedicated ratiometric fluorescent probe and flow cytometry.
	Lipid Peroxidation (normalized MFI)
Young	0.846558	1.00217	1.83243	0.986325	0.694038	0.836501	0.434552	0.71525
Aged	1.27924	2.09473	1.46314	1.37466	1.40737	1.50263	1.4559
Aged IR	0.712876	0.680888	0.490961	0.51172	0.747993	0.910462	0.981213
(C) Lipid peroxidation was determined in RPMs derived from dextran- and iron-dextran-injected mice (8 h post-injection) using a dedicated ratiometric fluorescent probe flow cytometry.
	Lipid peroxidation (normalized MFI)
Dextran	0.851724	0.770885	0.783401	0.894672	0.714926
Iron Dextran	1.01764	1.183	1.18179	1.20678	1.40725
(D) The percentage of RPMs from CD45+ live cells present in the spleen of dextran- and iron dextran-injected mice (8 h post-injection) was assessed by flow cytometry.
	% of RPMs from CD45+ live cells
Dextran	3	2.11	3.43	1.95	2.28
Iron Dextran	2	2.15	1.44	1.74	1.99
(E) Mitochondrial mass was determined in RPMs derived from young, aged, and aged IR mice using dedicated fluorescent probes and flow cytometry.
	Mitochondria mass (normalized MFI)
Young	1.33152	1.15867	1.23641	1.27059	1.3954	1.53372
Aged	0.924951	0.689254	0.761823	0.598454	0.795023	0.698944
Aged IR	1.02067	1.01316	0.863541	0.856682	0.95198	0.899211
(F) Mitochondrial membrane potential was determined in RPMs derived from young, aged, and aged IR mice using dedicated fluorescent probes and flow cytometry.
	Mitochondrial activity (normalized MFI)
Young	1.44769	1.30089	1.19659	1.40555	1.28483
Aged	0.674107	0.6094	0.607469	0.582354	0.563706
Aged IR	1.04689	0.999571	1.11739	1.00441	1.15915
(H) Protein aggregation in cultured iRPMs was determined using a fluorescent PROTEOSTAT Aggresome detection kit and flow cytometry. Cells were treated with FAC (150 µM, 24 h), PR73 mini-hepcidin (2 µg/mL, 24 h), or exposed to heat shock (HS) stress (42 °C, 4 h) as indicated.
	Protein aggregation (normalized MFI)
Control	0.865441	0.86605	0.592195	0.506441	0.531636	0.803501
FAC	0.761752	0.683602	0.617908	0.968593	0.785547	0.929613
PR73	0.730915	0.788956	0.751306	0.586588	0.707204	0.566541
FAC + PR73	0.775523	0.795254	0.772306	0.787491	1.07875	0.752964
HS Control	1.08251	0.867365	0.855562	1.02317	1.34418	1.03951
HS FAC	1.3597	1.51139	1.18452	1.68678	1.13788	1.52189
HS PR73	1.43025	1.00301	1.11333	1.18685	0.687996	1.17198
HS FAC + PR73	1.76692	1.79581	1.44819	1.57959	1.23795	1.37734
(I) Cell viability in cultured iRPMs was determined using a fluorescent Aqua Live/Dead probe and flow cytometry. Cells were treated with FAC (150 µM, 24 h), PR73 mini-hepcidin (2 µg/mL, 24 h), or exposed to heat shock (HS) stress (42 °C, 4 h) as indicated.
	Cell viability (normalized)
Control	1.01423	1.03954	0.986655	0.981394	1.01233	0.96585
FAC	0.878998	0.872259	0.91861	1.01206	1.01112	0.958841
PR73	0.98042	1.06344	1.00934	1.03223	0.992969	0.966628
FAC + PR73	0.912805	0.908105	0.907269	0.977861	0.991429	0.873069
HS Control	1.00296	0.920054	0.952633	0.884623	0.843133	0.829572
HS FAC	0.664883	0.776669	0.771179	0.5111	0.806059	0.85883
HS PR73	0.901536	0.812515	0.884587	0.847578	0.708478	0.828014
HS FAC + PR73	0.777575	0.740823	0.703134	0.886561	0.767884	0.8526
(J) Lipid peroxidation of cultured iRPMs was determined using a dedicated ratiometric fluorescent probe with flow cytometry. Cells were treated with FAC (150 µM, 24 h), Liproxstatin-1 (Lip-1; 2 µM, 25 h) or exposed to heat shock (HS) stress (42 °C, 4 h) as indicated.
	Lipid Peroxidation (Normalized MFI)
Control	0.816679	1.21266	0.368102	0.516396	0.510625	0.745726	0.74525	0.83096
FAC	1.5168	2.35152	1.85737	2.10661	2.10948	1.76119	2.46703	2.18105
HS FAC	1.39459	1.76174	1.89889	2.18118	2.54074	2.06325	1.44224	1.86393
HS Lip-1 + FAC	1.2839	1.59553	0.832812	0.850859	0.880792	0.726129	0.687774	0.66904
(K) Cell viability of cultured iRPMs was determined using a fluorescent Aqua Live/Dead probe with flow cytometry. Cells were treated with FAC (150 µM, 24 h), Liproxstatin-1 (Lip-1; 2 µM, 25 h) or exposed to heat shock (HS) stress (42 °C, 4 h) as indicated.
	Cell viability (normalized)
Control	1.01951	0.90801	0.882065	0.804562	1.20867	1.19277	1.18735	0.934728	0.914045	0.948288
FAC	0.844732	1.12237	1.02868	0.793781	1.1138	1.17312	1.11909	0.803848	0.875111	0.673353
HS FAC	0.794477	0.736445	0.831115	0.815343	0.773285	0.680352	0.64583	0.801846	0.707898	0.648582
HS Lip-1 + FAC	1.09052	1.03773	1.11854	1.14533	0.917368	0.983873	1.01581	0.956967	0.868472	1.01582
