# Supplementary material for: Impaired iron recycling from erythrocytes is an early hallmark of aging
Source: eLife. 2023 Jan 31;12:e79196. doi: 10.7554/eLife.79196 (PMC9931393; doi:10.7554/eLife.79196)
Supplement: Figure 6—figure supplement 1—source data 1. [file elife-79196-fig6-figsupp1-data1.xlsx]

## Sheet: Arkusz1
Figure 6 - Source Data 2 Related to Figure 6-figure supplement 1 (A-E) and (G)
Iron loading, but not oxidative stress leads to RPM decline during aging.
(A) The cytosolic ROS levels in RPMs derived from young, aged, and aged NAC were assessed by determining CellROX Deep Red fluorescence intensity with flow cytometry.
	Oxidative stress in RPMs (normalized MFI)
Young	0.749866	0.85011	0.794868	0.859307	0.929639
Aged	1.01686	1.17772	1.34689	1.1987	1.37904
Aged NAC	1.10498	1.02174	0.936966	0.799976	0.833339
(B) RBC clearance capacity of RPMs derived from young, aged, and aged NAC mice was determined by measuring the percentage of RPMs that phagocytosed transfused PKH67-labeled temperature-stressed RBCs.
	Erythrophagocytosis rate (% of RBC+ RPMs)
Young	42.84	44.21	39.25	41.28	39.46	34.73
Aged	35.73	30.26	33.57	34.13	26.73
Aged NAC	36.49	36.64	33.42	29.87	38.09	28.24
(C) The cytosolic ROS levels in RBCs derived from the spleen of young, aged, and aged NAC mice were assessed by determining CellROX Deep Red fluorescence intensity with flow cytometry.
	Oxdative stress in RBCs (normalized MFI)
Young	0.462779	0.389085	0.781284	0.585913	0.745497
Aged	1.49702	1.72991	1.05452	1.24002	1.08183
Aged NAC	1.24917	0.986131	1.01436	1.06407	1.11841
(D) Extracellular heme levels were measured in the supernatant obtained after the dissociation of spleens from young, aged, and aged NAC mice using the Heme Assay Kit.
	Extracellular heme (ug/g fresh tissue)
Young	86.6872	126.572	181.422	170.825	116.469
Aged	190.18	210.522	233.02	181.24	215.077
Aged NAC	233.076	201.629	213.362	253.434	209.321
(E) Lipid peroxidation was determined in RPMs derived from young, aged, and aged NAC mice using the Lipid Peroxidation Assay Kit with flow cytometry.
	Lipid peroxidation in RPMs (normalized MFI)
Young	0.493325	0.722145	0.723547	0.578088	0.676644
Aged	0.939667	0.709546	1.0147	1.03102	1.03942
Aged NAC	1.00875	1.08264	1.27213	0.706501	1.05859
(G) Spleen non-heme iron content was determined in young, aged, and aged NAC mice.
	Spleen non-heme iron (ug/g dry tissue)
Young	3181.59	2395.66	2007.43	2177.87	2736.54	1898.14	1526.76
Aged	5747.69	4573.53	5728.75	5738.22	5766.63	6633.16	6684.74
Aged NAC	5842.38	4781.85	5548.84	5681.41	5700.34	6241.16	6798.22
