# Supplementary material for: Impaired iron recycling from erythrocytes is an early hallmark of aging
Source: eLife. 2023 Jan 31;12:e79196. doi: 10.7554/eLife.79196 (PMC9931393; doi:10.7554/eLife.79196)
Supplement: Figure 6—figure supplement 2—source data 1. [file elife-79196-fig6-figsupp2-data1.xlsx]

## Sheet: Arkusz1
Figure 6 - Source Data 3 Related to Figure 6-figure supplement 2 (A-B)
The complement receptor CD16 and the apoptotic cell receptor STAB2 are not regulated by iron-loading.
(A) Cell membrane expression of CD16 was determined by using fluorescently labeled antibodies and flow cytometry. Cells were treated with FAC (50 µM, 24 h) with or without the addition of DFO (100 µM, 18 h) as indicated.
	CD16 (normalized MFI)
Control	1.04234	0.957773	1.01789	0.754622	0.59104	0.997491	0.750524
FAC	0.873354	1.02149	1.00983	1.04913	0.839709	0.916096	1.12736
FAC+DFO	0.978374	1.0705	1.02845	1.16937	1.19904	1.3239	1.28172
(B) Surface STAB2 was determined by using fluorescently labeled antibodies and flow cytometry. Cells were treated with FAC (50 µM, 24 h) with or without the addition of DFO (100 µM, 18 h) as indicated.
	STAB2 (normalized MFI)
Control	0.981055	0.978521	0.959659	0.744373	1.00941	1.1083	0.793101	1.06063
FAC	0.892065	1.05841	0.999506	0.902499	1.13477	1.08776	1.0515	0.996405
FAC+DFO	1.07035	0.964867	1.09557	1.25767	0.864413	1.07004	0.976161	0.942967
