# Supplementary material for: Impaired iron recycling from erythrocytes is an early hallmark of aging
Source: eLife. 2023 Jan 31;12:e79196. doi: 10.7554/eLife.79196 (PMC9931393; doi:10.7554/eLife.79196)
Supplement: Figure 6—figure supplement 3—source data 1. [file elife-79196-fig6-figsupp3-data1.xlsx]

## Sheet: Arkusz1
Figure 6 - Source Data 4 Related to Figure 6-figure supplement 3
Validation of the antibody against HO-1 in flow cytometry.
Shown is the intracellular staining and flow cytometric analysis of HO-1 in bone marrow-derived macrophages treated with ferric ammonium citrate (FAC, 50 µM, 24 h) and iron chelator DFO (100 µM, 18h). Expected changes in fluorescence intensity were observed.
	Intracellular HO-1 (normalized MFI)
Control	0.532497	0.646686	0.420014	0.510325	0.516452	0.842933
FAC	1.87714	1.74828		1.67423	1.31242	1.14951
FAC + DFO	0.679828	0.577744		1.04794	0.938637	0.840779
