# Supplementary material for: Impaired iron recycling from erythrocytes is an early hallmark of aging
Source: eLife. 2023 Jan 31;12:e79196. doi: 10.7554/eLife.79196 (PMC9931393; doi:10.7554/eLife.79196)
Supplement: Figure 6—figure supplement 4—source data 1. [file elife-79196-fig6-figsupp4-data1.xlsx]

## Sheet: Arkusz1
Figure 6-figure supplement 4.
(A) Lysosomal activity of cultured iRPMs was determined using a dedicated fluorescent probe and flow cytometry. Cells were treated with ZnPP in 5 µM, 1 µM and 0.5 µM concentrations for 24 h.
	Lysosomal activity (normalized MFI)
Control	1.06572	1.09372	1.00608	1.33055	1.31118
ZnPP 5 μM	0.713558	0.80526	0.731455	0.683662	0.635513
ZnPP 1 μM	1.07149	1.06424	1.13124	1.01281	0.989371
ZnPP 0.5 μM	1.14924	1.03678	1.13123	0.973158	1.06393
(B) Normalized phagocytic rate of PKH67-labeled temperature-stressed RBCs by cultured iRPMs. Cells were treated with hemin (50 µM).
	Lysosomal activity (normalized MFI)
Control	2.03614	2.03848	1.91499	1.41721	1.49136
Hemin	1.61815	1.85658	1.80624	1.61817	1.55624
(C) Normalized phagocytic rate of PKH67-labeled temperature-stressed RBCs by cultured iRPMs. Cells were treated with ZnPP (5 µM) and CORMA1 (50 µM) as indicated.
	Normalized erythrophagocytosis rate
Control	1.90847	2.046	1.67704	1.32754
CORM-A1	1.80424	1.76503	1.33708	1.42562
ZnPP	0.314031	0.356305	0.310308	0.185392
CORM-A1 + ZnPP	1.18987	1.20418	1.67175	1.06145
(D) Normalized phagocytic rate of PKH67-labeled temperature-stressed RBCs by cultured iRPMs. Cells were treated with ZnPP (5 µM) and Biliverdin (50 µM) as indicated.
	Normalized erythrophagocytosis rate
Control	1.35317	1.33789	1.07554	1.66369
Biliverdin	1.42901	1.27349	1.16803	1.87061
ZnPP	0.681857	0.621058	0.9942	0.232335
Biliverdin + ZnPP	0.535963	0.767562	0.76222	0.233372
