# Supplementary material for: Impaired iron recycling from erythrocytes is an early hallmark of aging
Source: eLife. 2023 Jan 31;12:e79196. doi: 10.7554/eLife.79196 (PMC9931393; doi:10.7554/eLife.79196)
Supplement: Figure 6—source data 1. [file elife-79196-fig6-data1.xlsx]

## Sheet: Arkusz1
Figure 6 - Source Data 1 Related to Figure (A) and (C-L)
Iron loading undermines the phagocytic activity of aged RPMs in concert with impaired heme metabolism and ER stress.
(A) Normalized erythrophagocytosis capacity of PKH67-labeled temperature-stressed RBCs by cultured iRPMs. Cells were treated with FAC (50 µM, 24 h) and DFO (100 µM, 18 h) as indicated.
	Normalized erythrophagocytosis rate
Control	2.03614	2.03848	1.91499	1.41721	1.49136	1.20213	1.03	1.97	1.25
FAC	0.408208	0.482136	0.634018	0.414471	0.697022	0.589448	0.97	0.56	0.52
DFO	1.9549	1.96121	1.616	1.51993	1.49887	1.02001	1.02	0.86	1.18
FAC + DFO	0.582455	1.79565	1.26454	0.834019	1.06859	0.956307	1.02	0.67	1.01
(C) Lysosomal activity of cultured iRPMs were determined using Lysosomal Intracellular Activity Assay Kit and TMRE probe, respectively, with flow cytometry. Cells were treated with FAC (50 µM, 24 h) and DFO (100 µM, 18 h) as indicated.
	Lysosomal Activity (normalized MFI)
Control	1.40237	1.30136	1.1138	1.03743
FAC	0.644865	0.614087	0.946837	0.877895
DFO	1.09893	1.10152	1.0332	0.967573
FAC + DFO	1.05107	1.05507	1.18333	1.09152
(D) Mitochondrial activity of cultured iRPMs were determined using Lysosomal Intracellular Activity Assay Kit and TMRE probe, respectively, with flow cytometry. Cells were treated with FAC (50 µM, 24 h) and DFO (100 µM, 18 h) as indicated.
	Mitochondrial activity (normalized MFI)
Control	1.41084	1.06629	1.65874	1.68651
FAC	1.00364	0.761022	0.636851	0.660953
DFO	0.985903	0.641198	0.991008	0.8549
FAC + DFO	0.970438	0.635011	0.815563	0.840146
(E) Membrane levels of MERTK of cultured iRPMs were determined using fluorescently labeled antibodies and flow cytometry. Cells were treated with FAC (50 µM, 24 h) and DFO (100 µM, 18 h) as indicated.
	MERTK (normalized MFI)
Control	0.961553	1.01758	1.04793	0.981259	1.31384
FAC	0.83968	0.888086	0.927209	0.942521	0.555732
FAC + DFO	1.21308	0.876862	1.2133	1.09095	1.13043
(F) Membrane levels of AXL of cultured iRPMs were determined using fluorescently labeled antibodies and flow cytometry. Cells were treated with FAC (50 µM, 24 h) and DFO (100 µM, 18 h) as indicated.
	AXL (normalized MFI)
Control	1.39479	1.40672	1.63636	1.52665	1.22347	1.03217	0.750494	1.24524
FAC	0.181602	0.238327	0.339591	0.590328	0.987722	0.79074	0.883998	1.04552
FAC + DFO	0.943503	1.45981	1.3993	1.05089	0.835986	1.36485	0.962698	0.709242
(G) Membrane levels of TIM4 of cultured iRPMs were determined using fluorescently labeled antibodies and flow cytometry. Cells were treated with FAC (50 µM, 24 h) and DFO (100 µM, 18 h) as indicated.
	TIM4 (normalized MFI)
Control	1.58933	1.64959	0.920352	0.70826	1.11424	0.992176	1.60158	1.54356	1.43558	0.832377
FAC	0.51313	0.342678	0.879125	1.06255	1.14082	1.02761	0.697149	0.802817	0.814989	0.004869
FAC + DFO	1.60947	1.83857	1.29155	1.28076	0.198725	1.38383	0.701271	1.24378	1.55956	0.762476
(H) Cytosolic calcium levels of cultured iRPMs were determined using Cal-520 fluorescent probe with flow cytometry. Cells were treated with FAC (50 µM, 24 h) and DFO (100 µM, 18 h) as indicated.
	Calcium levels (normalized MFI)
Control	0.369282	1.15571	1.32308	0.568773	1.49855	1.4841	1.42921
FAC	0.485053	0.61761	0.959282	0.707779	0.433245	0.351837	0.634284
FAC + DFO	1.20106	1.25584	1.73657	1.61997	1.21722	1.00925	0.942296
(I) Intracellular HO-1 protein levels in RPMs isolated from young, aged, and aged IR mice.
	Intracellular HO-1 (normalized MFI)
Young	1.27919	0.926602	1.21402	1.42743	1.68039
Aged	0.812291	0.799924	0.706049	0.675073
Aged IR	1.16132	1.02067	0.617163	0.805955	0.873924
(J) Intracellular HO-1 protein levels in RPMs isolated from mice at the indicated age.
	Intracellular HO-1 (normalized MFI)
2 months	1.41166	1.22839	1.20578
5 months	1.14565	0.993689	0.862821
6 months	0.862087	0.984536	0.909003
7.5 months	1.04798	0.821473	0.973842
9 months	0.853174	0.902971	0.796949
(K) Normalized erythrophagocytosis capacity of PKH67-labeled temperature-stressed RBCs by cultured iRPMs. Cells were treated with ZnPP (0.5 µM, 24 h).
	Normalized erythrophagocytosis rate
Control	2.4317	2.03614	2.03848	1.91499	1.41721	1.49136
ZnPP 0.5 μM	0.694772	0.846762	0.559842	1.00821	1.15622	1.01604
(L) Normalized erythrophagocytosis capacity of PKH67-labeled temperature-stressed RBCs by cultured iRPMs. Cells were treated with indicated concentrations of ZnPP (0.5 µM) and FAC (10 µM) and with ER stress inducer Tunicamycin (Tm; 2.5 µM) for 24 h.
	Normalized erythrophagocytosis rate
Control	1.25334	1.52487	1.4423	1.47641	1.13455	1.11176	1.27	1.37	1.7
FAC	1.03608	1.0368	1.0552	1.29646	0.918701	0.839712	1.24	0.61	0.82
ZnPP	0.914259	0.579871	0.919938	0.919076	1.13027	1.18303	1.16	0.8	1
Tm	1.15501	1.24908	0.873486	0.797576	1.10518	1.22158	1.06	1.41	1.46
FAC + ZnPP	0.641316	0.609376	0.709081	0.955895	0.942367	0.783417	1.16	0.74	0.81
FAC + Tm					1.03789	0.934554	0.79	0.83	0.67
ZnPP + Tm					0.918701	1.13921	0.86	1.4	1.02
FAC + ZnPP + Tm				0.554575	0.812346	0.786744	0.46	0.85	0.52
